# Supplementary material for: A transcriptome atlas of leg muscles from healthy human volunteers reveals molecular and cellular signatures associated with muscle location
Source: eLife. 2023 Feb 6;12:e80500. doi: 10.7554/eLife.80500 (PMC9988256; doi:10.7554/eLife.80500)
Supplement: Supplementary file 1. [file elife-80500-supp1.xls]

## Sheet: overview
Supplementary Table S1. Samples’ metadata.
individual	The individual anonymous id.
age	Age of individual underwent surgery.
muscle	The muscle biopsies collected from gracilis (GR), semitendinosus (ST), rectus femoris (RF), vastus lateralis (VL), vastus medialis (VM) muscles, and gastrocnemius lateralis (GL).
hospital	The hospital in which the surgery took place: Erasmus Medical Center (EMC) and Medisch Centrum Haaglanden (HMC).
RNA isolation protocol	RNA was precipitated with isopropyl alcohol (without kit) or RNA purified with miRNeasy Mini Kit (217004, Qiagen) (with kit).
concentration (ng/ul)	The RNA concentaration.
RIN score	RNA integrity was assessed with the Agilent 2100 Bioanalyzer using Eukaryote Total RNA Nano chips (Agilent BioAnalyzer, 824.070.709).
batch	Poly(A) library preparation was performed in four batches each with 39 samples. Batch 5 was the re-sequencing batch.
library size	The total number of reads that were sequenced.

## Sheet: SupplementaryTableS1
individual	age	muscle	hospital	RNA isolation protocol	concentration (ng/ul)	RIN score	batch	library size
MD06	19	GL	HMC	Without Kit	151	5.6	5	19312813
MD06	19	GR	HMC	Without Kit	108	4.2	4	6957983
MD06	19	RF	HMC	Without Kit	76.6	5	3	10425392
MD06	19	STD	HMC	Without Kit	121	5.3	4	6104432
MD06	19	STM	HMC	Without Kit	111	4.9	3	7684701
MD06	19	VL	HMC	Without Kit	110	5.9	5	19131368
MD06	19	VM	HMC	Without Kit	13.1	5.4	1	11512520
MD07	20	GL	HMC	Without Kit	20.6	NA	5	9584483
MD07	20	GR	HMC	Without Kit	30.4	NA	5	6656686
MD07	20	RF	HMC	Without Kit	25	NA	2	7359520
MD07	20	STD	HMC	Without Kit	23.2	2.6	1	8351668
MD07	20	STM	HMC	Without Kit	13.9	2.6	5	5379489
MD07	20	VL	HMC	Without Kit	8.16	NA	5	17766553
MD08	22	GL	HMC	Without Kit	108	2.8	1	16509908
MD08	22	GR	HMC	Without Kit	110	NA	5	5974163
MD10	29	RF	HMC	Without Kit	16.3	5.2	5	7560118
MD08	22	STD	HMC	Without Kit	29.2	NA	5	22750547
MD08	22	STM	HMC	Without Kit	82	NA	1	11845152
MD08	22	VL	HMC	Without Kit	16	5.6	4	7709406
MD08	22	VM	HMC	Without Kit	24.6	NA	5	14999286
MD10	29	GL	HMC	Without Kit	103	4.8	3	10917381
MD10	29	GR	HMC	Without Kit	27.8	4.2	1	13439956
MD10	29	STM	HMC	Without Kit	152	4.8	2	5260015
MD10	29	VL	HMC	Without Kit	89.4	2.9	1	11083907
MD10	29	VM	HMC	Without Kit	48.8	3.4	4	9616014
MD11	24	GL	HMC	With Kit	408	7.8	3	9125877
MD11	24	GR	HMC	With Kit	146	NA	5	14753963
MD11	24	STD	HMC	With Kit	195	8.1	1	14441081
MD11	24	STM	HMC	With Kit	448	7.8	1	14409651
MD11	24	VL	HMC	With Kit	74.4	5.4	5	5692863
MD11	24	VM	HMC	With Kit	36.6	6.7	5	22293426
MD12	32	GL	HMC	Without Kit	152	5.2	5	18600240
MD12	32	GR	HMC	Without Kit	47.4	3.8	3	9950045
MD12	32	RF	HMC	Without Kit	91.6	5	1	11226897
MD12	32	STD	HMC	Without Kit	153	7.2	4	11087501
MD12	32	STM	HMC	Without Kit	302	6.6	3	6040923
MD12	32	VM	HMC	Without Kit	23.2	4.7	1	9416315
MD13	25	GL	HMC	With Kit	314	5	5	17538412
MD13	25	GR	HMC	With Kit	187	7.3	1	13262462
MD13	25	RF	HMC	With Kit	210	2.2	5	6291953
MD13	25	STD	HMC	With Kit	126	6.5	5	7697754
MD13	25	STM	HMC	With Kit	11.8	4.7	1	10818494
MD13	25	VL	HMC	With Kit	97.8	6.2	5	22713096
MD13	25	VM	HMC	With Kit	87	6.7	5	31376756
MD14	26	GL	HMC	With Kit	191	7.6	5	15234931
MD14	26	GR	HMC	With Kit	202	7.5	2	8028778
MD14	26	RF	HMC	With Kit	6	7.2	1	18255975
MD14	26	STD	HMC	With Kit	114	7.3	5	33068202
MD14	26	STM	HMC	With Kit	85	7.9	3	9889515
MD14	26	VL	HMC	With Kit	129	4.9	3	7468396
MD15	24	GL	HMC	With Kit	96.8	6.5	1	8934171
MD15	24	GR	HMC	With Kit	554	8.1	3	18528552
MD15	24	RF	HMC	With Kit	117	6.9	3	5404656
MD15	24	STD	HMC	With Kit	686	7.9	5	10156502
MD15	24	STM	HMC	With Kit	232	8.5	5	17032340
MD15	24	VL	HMC	With Kit	302	7.7	5	15199914
MD15	24	VM	HMC	With Kit	114	7.6	1	17788167
MD16	21	GL	HMC	With Kit	246	5.4	2	6377236
MD16	21	GR	HMC	With Kit	420	7.5	1	15305785
MD16	21	RF	HMC	With Kit	77.6	5.2	1	14999701
MD16	21	STD	HMC	With Kit	179	7.1	3	8067746
MD16	21	STM	HMC	With Kit	121	8	4	6741066
MD16	21	VL	HMC	With Kit	9.2	6.9	4	10054982
MD16	21	VM	HMC	With Kit	29	6.3	3	17411136
MD17	25	GL	HMC	With Kit	136	6.4	5	8687751
MD17	25	GR	HMC	With Kit	648	7.6	2	6856659
MD17	25	STD	HMC	With Kit	206	7.3	1	13865968
MD17	25	STM	HMC	With Kit	618	7.6	4	7570028
MD17	25	VL	HMC	With Kit	40.4	NA	4	6152770
MD17	25	VM	HMC	With Kit	138	7.2	3	7079168
MD18	28	GL	HMC	With Kit	38.6	4	5	7271363
MD18	28	GR	HMC	With Kit	35.6	6.6	4	5232778
MD18	28	RF	HMC	With Kit	10.3	NA	4	10883068
MD18	28	STD	HMC	With Kit	154	7.5	3	5545791
MD18	28	STM	HMC	With Kit	664	8.8	1	15114869
MD18	28	VL	HMC	With Kit	146	6.9	2	7602302
MD18	28	VM	HMC	With Kit	145	6.5	1	17748634
MD19	31	GL	HMC	With Kit	14.4	5.2	1	18640846
MD19	31	GR	HMC	With Kit	458	8.2	4	7939820
MD19	31	RF	HMC	With Kit	244	3.2	5	19282575
MD19	31	STD	HMC	With Kit	10.9	NA	5	14638446
MD19	31	STM	HMC	With Kit	248	7.1	3	9895899
MD19	31	VL	HMC	With Kit	314	4.2	5	12844065
MD19	31	VM	HMC	With Kit	288	5.5	4	6435884
MD20	25	GL	HMC	With Kit	145	8.2	3	8386377
MD20	25	GR	HMC	With Kit	364	7.2	3	4132094
MD20	25	RF	HMC	With Kit	19.8	6	2	5567186
MD20	25	STD	HMC	With Kit	42	5.9	4	11905414
MD20	25	STM	HMC	With Kit	396	7.2	1	10140520
MD20	25	VL	HMC	With Kit	17.3	5.9	1	8429970
MD20	25	VM	HMC	With Kit	48.8	7.6	2	9996881
MD21	28	GL	HMC	With Kit	222	6.6	3	4689113
MD21	28	GR	HMC	With Kit	476	7.8	1	14636332
MD21	28	RF	HMC	With Kit	39.6	7	4	12562898
MD21	28	STD	HMC	With Kit	25	6.8	1	11311332
MD21	28	STM	HMC	With Kit	50.4	7.1	2	6568411
MD21	28	VL	HMC	With Kit	42.2	5.3	5	13899506
MD21	28	VM	HMC	With Kit	61.8	7.4	3	13072165
MD22	26	GL	HMC	With Kit	204	7.2	5	19100263
MD22	26	GR	HMC	With Kit	28.8	7.2	3	10253013
MD22	26	RF	HMC	With Kit	80	2.7	4	10125077
MD22	26	STD	HMC	With Kit	161	7.3	3	9909226
MD22	26	STM	HMC	With Kit	750	8	4	5111233
MD22	26	VM	HMC	With Kit	73.2	2.9	1	6858025
MD26	22	GL	EMC	With Kit	14.3	5.4	5	30971825
MD26	22	GR	EMC	With Kit	49.8	6	3	13253220
MD26	22	STD	EMC	With Kit	32.6	5.5	2	7718697
MD26	22	STM	EMC	With Kit	196	7.4	3	5379238
MD26	22	VL	EMC	With Kit	24	6.2	1	15284131
MD27	28	GL	EMC	With Kit	44.6	6.1	4	5627489
MD27	28	GR	EMC	With Kit	280	8.3	1	14561222
MD27	28	RF	EMC	With Kit	95.6	4.9	1	13643153
MD27	28	STD	EMC	With Kit	312	8	3	5246056
MD27	28	STM	EMC	With Kit	560	7.9	2	7533505
MD27	28	VM	EMC	With Kit	24.8	6.4	5	15142149
MD28	20	GL	EMC	With Kit	24.8	2.2	1	17025127
MD28	20	GR	EMC	With Kit	560	8.4	5	21804141
MD28	20	RF	EMC	With Kit	41.2	6.5	3	14496087
MD28	20	STD	EMC	With Kit	208	6.5	2	7251099
MD28	20	VL	EMC	With Kit	14.4	6.7	1	15791847
MD28	20	VM	EMC	With Kit	42.6	6.3	3	10142248
MD31	24	GL	EMC	With Kit	27	5.7	4	4873448
MD31	24	GR	EMC	With Kit	328	5.5	5	14998204
MD31	24	RF	EMC	With Kit	8.66	6.6	1	10630829
MD31	24	STD	EMC	With Kit	280	6.6	4	8160627
MD31	24	STM	EMC	With Kit	566	7.7	3	22525605
MD31	24	VL	EMC	With Kit	21.6	6.7	1	15305754
MD31	24	VM	EMC	With Kit	9.9	6.7	2	6125152
