# Supplementary material for: A transcriptome atlas of leg muscles from healthy human volunteers reveals molecular and cellular signatures associated with muscle location
Source: eLife. 2023 Feb 6;12:e80500. doi: 10.7554/eLife.80500 (PMC9988256; doi:10.7554/eLife.80500)
Supplement: Supplementary file 2. [file elife-80500-supp2.xls]

## Sheet: overview
Supplementary Table S2. A combined list of the genes marking different cell types.
ensembl gene id	The id based on ensembl version 98 (http://sep2019.archive.ensembl.org/).
hgnc symbol	Gene symbol based on ensembl version 98 (http://sep2019.archive.ensembl.org/).
hgnc symbol (synonym)	Gene symbol used in the publication when differed from the `hgnc symbol` (column B).
Cell type	Different cell types present in human skeletal muscles; FAB stands for fibro-adipogenic progenitors, PCV stands for post-capillary venule (PCV) and NK for natural killer.
reference	The DOI of the studies presenting the cell type marker.

## Sheet: SupplementaryTableS2
ensembl gene id	hgnc symbol	hgnc symbol (synonym)	Cell type	reference
ENSG00000110799	VWF		Endothelial Cells	Rubenstein (2020; DOI:10.1038/s41598-019-57110-6)
ENSG00000240583	AQP1		Endothelial Cells	Rubenstein (2020; DOI:10.1038/s41598-019-57110-6)
ENSG00000091409	ITGA6		Endothelial Cells	Rubenstein (2020; DOI:10.1038/s41598-019-57110-6)
ENSG00000175899	A2M		Endothelial Cells	Rubenstein (2020; DOI:10.1038/s41598-019-57110-6)
ENSG00000165949	IFI27		Endothelial Cells	Rubenstein (2020; DOI:10.1038/s41598-019-57110-6)
ENSG00000127920	GNG11		Endothelial Cells	Rubenstein (2020; DOI:10.1038/s41598-019-57110-6)
ENSG00000019582	CD74		Endothelial Cells	Rubenstein (2020; DOI:10.1038/s41598-019-57110-6)
ENSG00000184113	CLDN5		Endothelial Cells	Rubenstein (2020; DOI:10.1038/s41598-019-57110-6)
ENSG00000135218	CD36		Endothelial Cells	Rubenstein (2020; DOI:10.1038/s41598-019-57110-6)
ENSG00000165810	BTNL9		Endothelial Cells	Rubenstein (2020; DOI:10.1038/s41598-019-57110-6)
ENSG00000213949	ITGA1		Endothelial Cells	Rubenstein (2020; DOI:10.1038/s41598-019-57110-6)
ENSG00000170323	FABP4		Endothelial Cells	Rubenstein (2020; DOI:10.1038/s41598-019-57110-6)
ENSG00000129538	RNASE1		Endothelial Cells	Rubenstein (2020; DOI:10.1038/s41598-019-57110-6)
ENSG00000172889	EGFL7		Endothelial Cells	Rubenstein (2020; DOI:10.1038/s41598-019-57110-6)
ENSG00000069122	ADGRF5	GPR116	Endothelial Cells	Rubenstein (2020; DOI:10.1038/s41598-019-57110-6)
ENSG00000179776	CDH5		Endothelial Cells	Rubenstein (2020; DOI:10.1038/s41598-019-57110-6)
ENSG00000234745	HLA-B		Endothelial Cells	Rubenstein (2020; DOI:10.1038/s41598-019-57110-6)
ENSG00000102760	RGCC		Endothelial Cells	Rubenstein (2020; DOI:10.1038/s41598-019-57110-6)
ENSG00000167874	TMEM88		Endothelial Cells	Rubenstein (2020; DOI:10.1038/s41598-019-57110-6)
ENSG00000196126	HLA-DRB1		Endothelial Cells	Rubenstein (2020; DOI:10.1038/s41598-019-57110-6)
ENSG00000173210	ABLIM3		Endothelial Cells	Rubenstein (2020; DOI:10.1038/s41598-019-57110-6)
ENSG00000204592	HLA-E		Endothelial Cells	Rubenstein (2020; DOI:10.1038/s41598-019-57110-6)
ENSG00000105974	CAV1		Endothelial Cells	Rubenstein (2020; DOI:10.1038/s41598-019-57110-6)
ENSG00000125810	CD93		Endothelial Cells	Rubenstein (2020; DOI:10.1038/s41598-019-57110-6)
ENSG00000169908	TM4SF1		Endothelial Cells	Rubenstein (2020; DOI:10.1038/s41598-019-57110-6)
ENSG00000167244	IGF2		Endothelial Cells	Rubenstein (2020; DOI:10.1038/s41598-019-57110-6)
ENSG00000128567	PODXL		Endothelial Cells	Rubenstein (2020; DOI:10.1038/s41598-019-57110-6)
ENSG00000074416	MGLL		Endothelial Cells	Rubenstein (2020; DOI:10.1038/s41598-019-57110-6)
ENSG00000166710	B2M		Endothelial Cells	Rubenstein (2020; DOI:10.1038/s41598-019-57110-6)
ENSG00000164035	EMCN		Endothelial Cells	Rubenstein (2020; DOI:10.1038/s41598-019-57110-6)
ENSG00000167434	CA4		Endothelial Cells	Rubenstein (2020; DOI:10.1038/s41598-019-57110-6)
ENSG00000164687	FABP5		Endothelial Cells	Rubenstein (2020; DOI:10.1038/s41598-019-57110-6)
ENSG00000102755	FLT1		Endothelial Cells	Rubenstein (2020; DOI:10.1038/s41598-019-57110-6)
ENSG00000140105	WARS		Endothelial Cells	Rubenstein (2020; DOI:10.1038/s41598-019-57110-6)
ENSG00000034510	TMSB10		Endothelial Cells	Rubenstein (2020; DOI:10.1038/s41598-019-57110-6)
ENSG00000125337	KIF25		Endothelial Cells	Rubenstein (2020; DOI:10.1038/s41598-019-57110-6)
ENSG00000130303	BST2		Endothelial Cells	Rubenstein (2020; DOI:10.1038/s41598-019-57110-6)
ENSG00000065054	SLC9A3R2		Endothelial Cells	Rubenstein (2020; DOI:10.1038/s41598-019-57110-6)
ENSG00000251322	SHANK3		Endothelial Cells	Rubenstein (2020; DOI:10.1038/s41598-019-57110-6)
ENSG00000149564	ESAM		Endothelial Cells	Rubenstein (2020; DOI:10.1038/s41598-019-57110-6)
ENSG00000196628	TCF4		Endothelial Cells	Rubenstein (2020; DOI:10.1038/s41598-019-57110-6)
ENSG00000130396	AFDN	MLLT4	Endothelial Cells	Rubenstein (2020; DOI:10.1038/s41598-019-57110-6)
ENSG00000185010	F8		Endothelial Cells	Rubenstein (2020; DOI:10.1038/s41598-019-57110-6)
ENSG00000206503	HLA-A		Endothelial Cells	Rubenstein (2020; DOI:10.1038/s41598-019-57110-6)
ENSG00000161649	CD300LG		Endothelial Cells	Rubenstein (2020; DOI:10.1038/s41598-019-57110-6)
ENSG00000127329	PTPRB		Endothelial Cells	Rubenstein (2020; DOI:10.1038/s41598-019-57110-6)
ENSG00000106991	ENG		Endothelial Cells	Rubenstein (2020; DOI:10.1038/s41598-019-57110-6)
ENSG00000204291	COL15A1		LUM+ FAP Cells	Rubenstein (2020; DOI:10.1038/s41598-019-57110-6)
ENSG00000189058	APOD		LUM+ FAP Cells	Rubenstein (2020; DOI:10.1038/s41598-019-57110-6)
ENSG00000139329	LUM		LUM+ FAP Cells	Rubenstein (2020; DOI:10.1038/s41598-019-57110-6)
ENSG00000011465	DCN		LUM+ FAP Cells	Rubenstein (2020; DOI:10.1038/s41598-019-57110-6)
ENSG00000196616	ADH1B		LUM+ FAP Cells	Rubenstein (2020; DOI:10.1038/s41598-019-57110-6)
ENSG00000034971	MYOC		LUM+ FAP Cells	Rubenstein (2020; DOI:10.1038/s41598-019-57110-6)
ENSG00000125730	C3		LUM+ FAP Cells	Rubenstein (2020; DOI:10.1038/s41598-019-57110-6)
ENSG00000197766	CFD		LUM+ FAP Cells	Rubenstein (2020; DOI:10.1038/s41598-019-57110-6)
ENSG00000141338	ABCA8		LUM+ FAP Cells	Rubenstein (2020; DOI:10.1038/s41598-019-57110-6)
ENSG00000107317	PTGDS		LUM+ FAP Cells	Rubenstein (2020; DOI:10.1038/s41598-019-57110-6)
ENSG00000148180	GSN		LUM+ FAP Cells	Rubenstein (2020; DOI:10.1038/s41598-019-57110-6)
ENSG00000112562	SMOC2		LUM+ FAP Cells	Rubenstein (2020; DOI:10.1038/s41598-019-57110-6)
ENSG00000143196	DPT		LUM+ FAP Cells	Rubenstein (2020; DOI:10.1038/s41598-019-57110-6)
ENSG00000104213	PDGFRL		LUM+ FAP Cells	Rubenstein (2020; DOI:10.1038/s41598-019-57110-6)
ENSG00000145824	CXCL14		LUM+ FAP Cells	Rubenstein (2020; DOI:10.1038/s41598-019-57110-6)
ENSG00000163359	COL6A3		LUM+ FAP Cells	Rubenstein (2020; DOI:10.1038/s41598-019-57110-6)
ENSG00000182326	C1S		LUM+ FAP Cells	Rubenstein (2020; DOI:10.1038/s41598-019-57110-6)
ENSG00000163520	FBLN2		LUM+ FAP Cells	Rubenstein (2020; DOI:10.1038/s41598-019-57110-6)
ENSG00000132386	SERPINF1		LUM+ FAP Cells	Rubenstein (2020; DOI:10.1038/s41598-019-57110-6)
ENSG00000111341	MGP		LUM+ FAP Cells	Rubenstein (2020; DOI:10.1038/s41598-019-57110-6)
ENSG00000077942	FBLN1		LUM+ FAP Cells	Rubenstein (2020; DOI:10.1038/s41598-019-57110-6)
ENSG00000000971	CFH		LUM+ FAP Cells	Rubenstein (2020; DOI:10.1038/s41598-019-57110-6)
ENSG00000164692	COL1A2		LUM+ FAP Cells	Rubenstein (2020; DOI:10.1038/s41598-019-57110-6)
ENSG00000106333	PCOLCE		LUM+ FAP Cells	Rubenstein (2020; DOI:10.1038/s41598-019-57110-6)
ENSG00000138615	CILP		LUM+ FAP Cells	Rubenstein (2020; DOI:10.1038/s41598-019-57110-6)
ENSG00000136546	SCN7A		LUM+ FAP Cells	Rubenstein (2020; DOI:10.1038/s41598-019-57110-6)
ENSG00000154263	ABCA10		LUM+ FAP Cells	Rubenstein (2020; DOI:10.1038/s41598-019-57110-6)
ENSG00000017427	IGF1		LUM+ FAP Cells	Rubenstein (2020; DOI:10.1038/s41598-019-57110-6)
ENSG00000090006	LTBP4		LUM+ FAP Cells	Rubenstein (2020; DOI:10.1038/s41598-019-57110-6)
ENSG00000142173	COL6A2		LUM+ FAP Cells	Rubenstein (2020; DOI:10.1038/s41598-019-57110-6)
ENSG00000140092	FBLN5		LUM+ FAP Cells	Rubenstein (2020; DOI:10.1038/s41598-019-57110-6)
ENSG00000167779	IGFBP6		LUM+ FAP Cells	Rubenstein (2020; DOI:10.1038/s41598-019-57110-6)
ENSG00000196569	LAMA2		LUM+ FAP Cells	Rubenstein (2020; DOI:10.1038/s41598-019-57110-6)
ENSG00000142156	COL6A1		LUM+ FAP Cells	Rubenstein (2020; DOI:10.1038/s41598-019-57110-6)
ENSG00000134853	PDGFRA		LUM+ FAP Cells	Rubenstein (2020; DOI:10.1038/s41598-019-57110-6)
ENSG00000116194	ANGPTL1		LUM+ FAP Cells	Rubenstein (2020; DOI:10.1038/s41598-019-57110-6)
ENSG00000106483	SFRP4		LUM+ FAP Cells	Rubenstein (2020; DOI:10.1038/s41598-019-57110-6)
ENSG00000189129	PLAC9		LUM+ FAP Cells	Rubenstein (2020; DOI:10.1038/s41598-019-57110-6)
ENSG00000123384	LRP1		LUM+ FAP Cells	Rubenstein (2020; DOI:10.1038/s41598-019-57110-6)
ENSG00000087245	MMP2		LUM+ FAP Cells	Rubenstein (2020; DOI:10.1038/s41598-019-57110-6)
ENSG00000101938	CHRDL1		LUM+ FAP Cells	Rubenstein (2020; DOI:10.1038/s41598-019-57110-6)
ENSG00000174348	PODN		LUM+ FAP Cells	Rubenstein (2020; DOI:10.1038/s41598-019-57110-6)
ENSG00000117594	HSD11B1		LUM+ FAP Cells	Rubenstein (2020; DOI:10.1038/s41598-019-57110-6)
ENSG00000115414	FN1		LUM+ FAP Cells	Rubenstein (2020; DOI:10.1038/s41598-019-57110-6)
ENSG00000129009	ISLR		LUM+ FAP Cells	Rubenstein (2020; DOI:10.1038/s41598-019-57110-6)
ENSG00000197614	MFAP5		LUM+ FAP Cells	Rubenstein (2020; DOI:10.1038/s41598-019-57110-6)
ENSG00000091986	CCDC80		LUM+ FAP Cells	Rubenstein (2020; DOI:10.1038/s41598-019-57110-6)
ENSG00000149131	SERPING1		LUM+ FAP Cells	Rubenstein (2020; DOI:10.1038/s41598-019-57110-6)
ENSG00000119630	PGF		LUM+ FAP Cells	Rubenstein (2020; DOI:10.1038/s41598-019-57110-6)
ENSG00000145824	CXCL14		Satellite Cells	Rubenstein (2020; DOI:10.1038/s41598-019-57110-6)
ENSG00000165092	ALDH1A1		Satellite Cells	Rubenstein (2020; DOI:10.1038/s41598-019-57110-6)
ENSG00000164056	SPRY1		Satellite Cells	Rubenstein (2020; DOI:10.1038/s41598-019-57110-6)
ENSG00000214548	MEG3		Satellite Cells	Rubenstein (2020; DOI:10.1038/s41598-019-57110-6)
ENSG00000135404	CD63		Satellite Cells	Rubenstein (2020; DOI:10.1038/s41598-019-57110-6)
ENSG00000130208	APOC1		Satellite Cells	Rubenstein (2020; DOI:10.1038/s41598-019-57110-6)
ENSG00000130203	APOE		Satellite Cells	Rubenstein (2020; DOI:10.1038/s41598-019-57110-6)
ENSG00000111049	MYF5		Satellite Cells	Rubenstein (2020; DOI:10.1038/s41598-019-57110-6)
ENSG00000186439	TRDN		Satellite Cells	Rubenstein (2020; DOI:10.1038/s41598-019-57110-6)
ENSG00000111046	MYF6		Satellite Cells	Rubenstein (2020; DOI:10.1038/s41598-019-57110-6)
ENSG00000106484	MEST		Satellite Cells	Rubenstein (2020; DOI:10.1038/s41598-019-57110-6)
ENSG00000187193	MT1X		Satellite Cells	Rubenstein (2020; DOI:10.1038/s41598-019-57110-6)
ENSG00000137285	TUBB2B		Satellite Cells	Rubenstein (2020; DOI:10.1038/s41598-019-57110-6)
ENSG00000138435	CHRNA1		Satellite Cells	Rubenstein (2020; DOI:10.1038/s41598-019-57110-6)
ENSG00000196141	SPATS2L		Satellite Cells	Rubenstein (2020; DOI:10.1038/s41598-019-57110-6)
ENSG00000125740	FOSB		Satellite Cells	Rubenstein (2020; DOI:10.1038/s41598-019-57110-6)
ENSG00000185482	STAC3		Satellite Cells	Rubenstein (2020; DOI:10.1038/s41598-019-57110-6)
ENSG00000170345	FOS		Satellite Cells	Rubenstein (2020; DOI:10.1038/s41598-019-57110-6)
ENSG00000009709	PAX7		Satellite Cells	Rubenstein (2020; DOI:10.1038/s41598-019-57110-6)
ENSG00000109846	CRYAB		Satellite Cells	Rubenstein (2020; DOI:10.1038/s41598-019-57110-6)
ENSG00000175183	CSRP2		Satellite Cells	Rubenstein (2020; DOI:10.1038/s41598-019-57110-6)
ENSG00000120738	EGR1		Satellite Cells	Rubenstein (2020; DOI:10.1038/s41598-019-57110-6)
ENSG00000115461	IGFBP5		Satellite Cells	Rubenstein (2020; DOI:10.1038/s41598-019-57110-6)
ENSG00000185559	DLK1		Satellite Cells	Rubenstein (2020; DOI:10.1038/s41598-019-57110-6)
ENSG00000171223	JUNB		Satellite Cells	Rubenstein (2020; DOI:10.1038/s41598-019-57110-6)
ENSG00000177606	JUN		Satellite Cells	Rubenstein (2020; DOI:10.1038/s41598-019-57110-6)
ENSG00000175161	CADM2		Satellite Cells	Rubenstein (2020; DOI:10.1038/s41598-019-57110-6)
ENSG00000105854	PON2		Satellite Cells	Rubenstein (2020; DOI:10.1038/s41598-019-57110-6)
ENSG00000131435	PDLIM4		Satellite Cells	Rubenstein (2020; DOI:10.1038/s41598-019-57110-6)
ENSG00000108551	RASD1		Satellite Cells	Rubenstein (2020; DOI:10.1038/s41598-019-57110-6)
ENSG00000173457	PPP1R14B		Satellite Cells	Rubenstein (2020; DOI:10.1038/s41598-019-57110-6)
ENSG00000108823	SGCA		Satellite Cells	Rubenstein (2020; DOI:10.1038/s41598-019-57110-6)
ENSG00000143171	RXRG		Satellite Cells	Rubenstein (2020; DOI:10.1038/s41598-019-57110-6)
ENSG00000117519	CNN3		Satellite Cells	Rubenstein (2020; DOI:10.1038/s41598-019-57110-6)
ENSG00000173402	DAG1		Satellite Cells	Rubenstein (2020; DOI:10.1038/s41598-019-57110-6)
ENSG00000175084	DES		Satellite Cells	Rubenstein (2020; DOI:10.1038/s41598-019-57110-6)
ENSG00000111907	TPD52L1		Satellite Cells	Rubenstein (2020; DOI:10.1038/s41598-019-57110-6)
ENSG00000128016	ZFP36		Satellite Cells	Rubenstein (2020; DOI:10.1038/s41598-019-57110-6)
ENSG00000120129	DUSP1		Satellite Cells	Rubenstein (2020; DOI:10.1038/s41598-019-57110-6)
ENSG00000198830	HMGN2		Satellite Cells	Rubenstein (2020; DOI:10.1038/s41598-019-57110-6)
ENSG00000196531	NACA		Satellite Cells	Rubenstein (2020; DOI:10.1038/s41598-019-57110-6)
ENSG00000099622	CIRBP		Satellite Cells	Rubenstein (2020; DOI:10.1038/s41598-019-57110-6)
ENSG00000154553	PDLIM3		Satellite Cells	Rubenstein (2020; DOI:10.1038/s41598-019-57110-6)
ENSG00000204628	RACK1	GNB2L1	Satellite Cells	Rubenstein (2020; DOI:10.1038/s41598-019-57110-6)
ENSG00000136997	MYC		Satellite Cells	Rubenstein (2020; DOI:10.1038/s41598-019-57110-6)
ENSG00000096384	HSP90AB1		Satellite Cells	Rubenstein (2020; DOI:10.1038/s41598-019-57110-6)
ENSG00000171490	RSL1D1		Satellite Cells	Rubenstein (2020; DOI:10.1038/s41598-019-57110-6)
ENSG00000142871	CCN1	CYR61	Satellite Cells	Rubenstein (2020; DOI:10.1038/s41598-019-57110-6)
ENSG00000100129	EIF3L		Satellite Cells	Rubenstein (2020; DOI:10.1038/s41598-019-57110-6)
ENSG00000120885	CLU		Satellite Cells	Rubenstein (2020; DOI:10.1038/s41598-019-57110-6)
ENSG00000100234	TIMP3		Pericytes	Rubenstein (2020; DOI:10.1038/s41598-019-57110-6)
ENSG00000168542	COL3A1		Pericytes	Rubenstein (2020; DOI:10.1038/s41598-019-57110-6)
ENSG00000163453	IGFBP7		Pericytes	Rubenstein (2020; DOI:10.1038/s41598-019-57110-6)
ENSG00000251562	MALAT1		Pericytes	Rubenstein (2020; DOI:10.1038/s41598-019-57110-6)
ENSG00000165795	NDRG2		Pericytes	Rubenstein (2020; DOI:10.1038/s41598-019-57110-6)
ENSG00000143248	RGS5		Pericytes	Rubenstein (2020; DOI:10.1038/s41598-019-57110-6)
ENSG00000185633	NDUFA4L2		Pericytes	Rubenstein (2020; DOI:10.1038/s41598-019-57110-6)
ENSG00000131097	HIGD1B		Pericytes	Rubenstein (2020; DOI:10.1038/s41598-019-57110-6)
ENSG00000069431	ABCC9		Pericytes	Rubenstein (2020; DOI:10.1038/s41598-019-57110-6)
ENSG00000074181	NOTCH3		Pericytes	Rubenstein (2020; DOI:10.1038/s41598-019-57110-6)
ENSG00000131055	COX4I2		Pericytes	Rubenstein (2020; DOI:10.1038/s41598-019-57110-6)
ENSG00000106819	ASPN		Pericytes	Rubenstein (2020; DOI:10.1038/s41598-019-57110-6)
ENSG00000121361	KCNJ8		Pericytes	Rubenstein (2020; DOI:10.1038/s41598-019-57110-6)
ENSG00000113721	PDGFRB		Pericytes	Rubenstein (2020; DOI:10.1038/s41598-019-57110-6)
ENSG00000140545	MFGE8		Pericytes	Rubenstein (2020; DOI:10.1038/s41598-019-57110-6)
ENSG00000127954	STEAP4		Pericytes	Rubenstein (2020; DOI:10.1038/s41598-019-57110-6)
ENSG00000109472	CPE		Pericytes	Rubenstein (2020; DOI:10.1038/s41598-019-57110-6)
ENSG00000128641	MYO1B		Pericytes	Rubenstein (2020; DOI:10.1038/s41598-019-57110-6)
ENSG00000146072	TNFRSF21		Pericytes	Rubenstein (2020; DOI:10.1038/s41598-019-57110-6)
ENSG00000135678	CPM		Pericytes	Rubenstein (2020; DOI:10.1038/s41598-019-57110-6)
ENSG00000151491	EPS8		Pericytes	Rubenstein (2020; DOI:10.1038/s41598-019-57110-6)
ENSG00000088992	TESC		Pericytes	Rubenstein (2020; DOI:10.1038/s41598-019-57110-6)
ENSG00000101335	MYL9		Pericytes	Rubenstein (2020; DOI:10.1038/s41598-019-57110-6)
ENSG00000107796	ACTA2		Pericytes	Rubenstein (2020; DOI:10.1038/s41598-019-57110-6)
ENSG00000183807	FAM162B		Pericytes	Rubenstein (2020; DOI:10.1038/s41598-019-57110-6)
ENSG00000185551	NR2F2		Pericytes	Rubenstein (2020; DOI:10.1038/s41598-019-57110-6)
ENSG00000113140	SPARC		Pericytes	Rubenstein (2020; DOI:10.1038/s41598-019-57110-6)
ENSG00000135916	ITM2C		Pericytes	Rubenstein (2020; DOI:10.1038/s41598-019-57110-6)
ENSG00000161544	CYGB		Pericytes	Rubenstein (2020; DOI:10.1038/s41598-019-57110-6)
ENSG00000167641	PPP1R14A		Pericytes	Rubenstein (2020; DOI:10.1038/s41598-019-57110-6)
ENSG00000122786	CALD1		Pericytes	Rubenstein (2020; DOI:10.1038/s41598-019-57110-6)
ENSG00000187513	GJA4		Pericytes	Rubenstein (2020; DOI:10.1038/s41598-019-57110-6)
ENSG00000164318	EGFLAM		Pericytes	Rubenstein (2020; DOI:10.1038/s41598-019-57110-6)
ENSG00000143933	CALM2		Pericytes	Rubenstein (2020; DOI:10.1038/s41598-019-57110-6)
ENSG00000101220	C20orf27		Pericytes	Rubenstein (2020; DOI:10.1038/s41598-019-57110-6)
ENSG00000111348	ARHGDIB		Pericytes	Rubenstein (2020; DOI:10.1038/s41598-019-57110-6)
ENSG00000104763	ASAH1		Pericytes	Rubenstein (2020; DOI:10.1038/s41598-019-57110-6)
ENSG00000113296	THBS4		Pericytes	Rubenstein (2020; DOI:10.1038/s41598-019-57110-6)
ENSG00000076706	MCAM		Pericytes	Rubenstein (2020; DOI:10.1038/s41598-019-57110-6)
ENSG00000172159	FRMD3		Pericytes	Rubenstein (2020; DOI:10.1038/s41598-019-57110-6)
ENSG00000150093	ITGB1		Pericytes	Rubenstein (2020; DOI:10.1038/s41598-019-57110-6)
ENSG00000148671	ADIRF		Pericytes	Rubenstein (2020; DOI:10.1038/s41598-019-57110-6)
ENSG00000125148	MT2A		Pericytes	Rubenstein (2020; DOI:10.1038/s41598-019-57110-6)
ENSG00000122378	PRXL2A	FAM213A	Pericytes	Rubenstein (2020; DOI:10.1038/s41598-019-57110-6)
ENSG00000105655	ISYNA1		Pericytes	Rubenstein (2020; DOI:10.1038/s41598-019-57110-6)
ENSG00000149591	TAGLN		Pericytes	Rubenstein (2020; DOI:10.1038/s41598-019-57110-6)
ENSG00000198467	TPM2		Pericytes	Rubenstein (2020; DOI:10.1038/s41598-019-57110-6)
ENSG00000143416	SELENBP1		Pericytes	Rubenstein (2020; DOI:10.1038/s41598-019-57110-6)
ENSG00000011465	DCN		FBN1+ FAP Cells	Rubenstein (2020; DOI:10.1038/s41598-019-57110-6)
ENSG00000197766	CFD		FBN1+ FAP Cells	Rubenstein (2020; DOI:10.1038/s41598-019-57110-6)
ENSG00000182326	C1S		FBN1+ FAP Cells	Rubenstein (2020; DOI:10.1038/s41598-019-57110-6)
ENSG00000163520	FBLN2		FBN1+ FAP Cells	Rubenstein (2020; DOI:10.1038/s41598-019-57110-6)
ENSG00000164692	COL1A2		FBN1+ FAP Cells	Rubenstein (2020; DOI:10.1038/s41598-019-57110-6)
ENSG00000167779	IGFBP6		FBN1+ FAP Cells	Rubenstein (2020; DOI:10.1038/s41598-019-57110-6)
ENSG00000189129	PLAC9		FBN1+ FAP Cells	Rubenstein (2020; DOI:10.1038/s41598-019-57110-6)
ENSG00000087245	MMP2		FBN1+ FAP Cells	Rubenstein (2020; DOI:10.1038/s41598-019-57110-6)
ENSG00000101938	CHRDL1		FBN1+ FAP Cells	Rubenstein (2020; DOI:10.1038/s41598-019-57110-6)
ENSG00000197614	MFAP5		FBN1+ FAP Cells	Rubenstein (2020; DOI:10.1038/s41598-019-57110-6)
ENSG00000091986	CCDC80		FBN1+ FAP Cells	Rubenstein (2020; DOI:10.1038/s41598-019-57110-6)
ENSG00000139910	NOVA1		FBN1+ FAP Cells	Rubenstein (2020; DOI:10.1038/s41598-019-57110-6)
ENSG00000168477	TNXB		FBN1+ FAP Cells	Rubenstein (2020; DOI:10.1038/s41598-019-57110-6)
ENSG00000108821	COL1A1		FBN1+ FAP Cells	Rubenstein (2020; DOI:10.1038/s41598-019-57110-6)
ENSG00000166482	MFAP4		FBN1+ FAP Cells	Rubenstein (2020; DOI:10.1038/s41598-019-57110-6)
ENSG00000164530	PI16		FBN1+ FAP Cells	Rubenstein (2020; DOI:10.1038/s41598-019-57110-6)
ENSG00000008394	MGST1		FBN1+ FAP Cells	Rubenstein (2020; DOI:10.1038/s41598-019-57110-6)
ENSG00000038427	VCAN		FBN1+ FAP Cells	Rubenstein (2020; DOI:10.1038/s41598-019-57110-6)
ENSG00000136235	GPNMB		FBN1+ FAP Cells	Rubenstein (2020; DOI:10.1038/s41598-019-57110-6)
ENSG00000115380	EFEMP1		FBN1+ FAP Cells	Rubenstein (2020; DOI:10.1038/s41598-019-57110-6)
ENSG00000144476	ACKR3		FBN1+ FAP Cells	Rubenstein (2020; DOI:10.1038/s41598-019-57110-6)
ENSG00000163430	FSTL1		FBN1+ FAP Cells	Rubenstein (2020; DOI:10.1038/s41598-019-57110-6)
ENSG00000035862	TIMP2		FBN1+ FAP Cells	Rubenstein (2020; DOI:10.1038/s41598-019-57110-6)
ENSG00000115461	IGFBP5		FBN1+ FAP Cells	Rubenstein (2020; DOI:10.1038/s41598-019-57110-6)
ENSG00000166147	FBN1		FBN1+ FAP Cells	Rubenstein (2020; DOI:10.1038/s41598-019-57110-6)
ENSG00000116690	PRG4		FBN1+ FAP Cells	Rubenstein (2020; DOI:10.1038/s41598-019-57110-6)
ENSG00000163710	PCOLCE2		FBN1+ FAP Cells	Rubenstein (2020; DOI:10.1038/s41598-019-57110-6)
ENSG00000224259	LINC01133		FBN1+ FAP Cells	Rubenstein (2020; DOI:10.1038/s41598-019-57110-6)
ENSG00000188257	PLA2G2A		FBN1+ FAP Cells	Rubenstein (2020; DOI:10.1038/s41598-019-57110-6)
ENSG00000196352	CD55		FBN1+ FAP Cells	Rubenstein (2020; DOI:10.1038/s41598-019-57110-6)
ENSG00000131459	GFPT2		FBN1+ FAP Cells	Rubenstein (2020; DOI:10.1038/s41598-019-57110-6)
ENSG00000174807	CD248		FBN1+ FAP Cells	Rubenstein (2020; DOI:10.1038/s41598-019-57110-6)
ENSG00000075223	SEMA3C		FBN1+ FAP Cells	Rubenstein (2020; DOI:10.1038/s41598-019-57110-6)
ENSG00000117143	UAP1		FBN1+ FAP Cells	Rubenstein (2020; DOI:10.1038/s41598-019-57110-6)
ENSG00000182667	NTM		FBN1+ FAP Cells	Rubenstein (2020; DOI:10.1038/s41598-019-57110-6)
ENSG00000154736	ADAMTS5		FBN1+ FAP Cells	Rubenstein (2020; DOI:10.1038/s41598-019-57110-6)
ENSG00000129038	LOXL1		FBN1+ FAP Cells	Rubenstein (2020; DOI:10.1038/s41598-019-57110-6)
ENSG00000168079	SCARA5		FBN1+ FAP Cells	Rubenstein (2020; DOI:10.1038/s41598-019-57110-6)
ENSG00000164694	FNDC1		FBN1+ FAP Cells	Rubenstein (2020; DOI:10.1038/s41598-019-57110-6)
ENSG00000146592	CREB5		FBN1+ FAP Cells	Rubenstein (2020; DOI:10.1038/s41598-019-57110-6)
ENSG00000184254	ALDH1A3		FBN1+ FAP Cells	Rubenstein (2020; DOI:10.1038/s41598-019-57110-6)
ENSG00000124212	PTGIS		FBN1+ FAP Cells	Rubenstein (2020; DOI:10.1038/s41598-019-57110-6)
ENSG00000101000	PROCR		FBN1+ FAP Cells	Rubenstein (2020; DOI:10.1038/s41598-019-57110-6)
ENSG00000121769	FABP3		FBN1+ FAP Cells	Rubenstein (2020; DOI:10.1038/s41598-019-57110-6)
ENSG00000038382	TRIO		FBN1+ FAP Cells	Rubenstein (2020; DOI:10.1038/s41598-019-57110-6)
ENSG00000069702	TGFBR3		FBN1+ FAP Cells	Rubenstein (2020; DOI:10.1038/s41598-019-57110-6)
ENSG00000187955	COL14A1		FBN1+ FAP Cells	Rubenstein (2020; DOI:10.1038/s41598-019-57110-6)
ENSG00000186665	C17orf58		FBN1+ FAP Cells	Rubenstein (2020; DOI:10.1038/s41598-019-57110-6)
ENSG00000105374	NKG7		NK Cells	Rubenstein (2020; DOI:10.1038/s41598-019-57110-6)
ENSG00000115523	GNLY		NK Cells	Rubenstein (2020; DOI:10.1038/s41598-019-57110-6)
ENSG00000271503	CCL5		NK Cells	Rubenstein (2020; DOI:10.1038/s41598-019-57110-6)
ENSG00000172543	CTSW		NK Cells	Rubenstein (2020; DOI:10.1038/s41598-019-57110-6)
ENSG00000158869	FCER1G		NK Cells	Rubenstein (2020; DOI:10.1038/s41598-019-57110-6)
ENSG00000126264	HCST		NK Cells	Rubenstein (2020; DOI:10.1038/s41598-019-57110-6)
ENSG00000134539	KLRD1		NK Cells	Rubenstein (2020; DOI:10.1038/s41598-019-57110-6)
ENSG00000203747	FCGR3A		NK Cells	Rubenstein (2020; DOI:10.1038/s41598-019-57110-6)
ENSG00000011600	TYROBP		NK Cells	Rubenstein (2020; DOI:10.1038/s41598-019-57110-6)
ENSG00000102879	CORO1A		NK Cells	Rubenstein (2020; DOI:10.1038/s41598-019-57110-6)
ENSG00000160255	ITGB2		NK Cells	Rubenstein (2020; DOI:10.1038/s41598-019-57110-6)
ENSG00000171476	HOPX		NK Cells	Rubenstein (2020; DOI:10.1038/s41598-019-57110-6)
ENSG00000180644	PRF1		NK Cells	Rubenstein (2020; DOI:10.1038/s41598-019-57110-6)
ENSG00000137441	FGFBP2		NK Cells	Rubenstein (2020; DOI:10.1038/s41598-019-57110-6)
ENSG00000100385	IL2RB		NK Cells	Rubenstein (2020; DOI:10.1038/s41598-019-57110-6)
ENSG00000136167	LCP1		NK Cells	Rubenstein (2020; DOI:10.1038/s41598-019-57110-6)
ENSG00000198821	CD247		NK Cells	Rubenstein (2020; DOI:10.1038/s41598-019-57110-6)
ENSG00000081237	PTPRC		NK Cells	Rubenstein (2020; DOI:10.1038/s41598-019-57110-6)
ENSG00000147443	DOK2		NK Cells	Rubenstein (2020; DOI:10.1038/s41598-019-57110-6)
ENSG00000132965	ALOX5AP		NK Cells	Rubenstein (2020; DOI:10.1038/s41598-019-57110-6)
ENSG00000115956	PLEK		NK Cells	Rubenstein (2020; DOI:10.1038/s41598-019-57110-6)
ENSG00000143119	CD53		NK Cells	Rubenstein (2020; DOI:10.1038/s41598-019-57110-6)
ENSG00000036448	MYOM2		NK Cells	Rubenstein (2020; DOI:10.1038/s41598-019-57110-6)
ENSG00000182866	LCK		NK Cells	Rubenstein (2020; DOI:10.1038/s41598-019-57110-6)
ENSG00000143110	C1orf162		NK Cells	Rubenstein (2020; DOI:10.1038/s41598-019-57110-6)
ENSG00000128340	RAC2		NK Cells	Rubenstein (2020; DOI:10.1038/s41598-019-57110-6)
ENSG00000110934	BIN2		NK Cells	Rubenstein (2020; DOI:10.1038/s41598-019-57110-6)
ENSG00000175567	UCP2		NK Cells	Rubenstein (2020; DOI:10.1038/s41598-019-57110-6)
ENSG00000235162	C12orf75		NK Cells	Rubenstein (2020; DOI:10.1038/s41598-019-57110-6)
ENSG00000175463	TBC1D10C		NK Cells	Rubenstein (2020; DOI:10.1038/s41598-019-57110-6)
ENSG00000240583	AQP1		PCV Endothelial Cells	Rubenstein (2020; DOI:10.1038/s41598-019-57110-6)
ENSG00000019582	CD74		PCV Endothelial Cells	Rubenstein (2020; DOI:10.1038/s41598-019-57110-6)
ENSG00000196126	HLA-DRB1		PCV Endothelial Cells	Rubenstein (2020; DOI:10.1038/s41598-019-57110-6)
ENSG00000204287	HLA-DRA		PCV Endothelial Cells	Rubenstein (2020; DOI:10.1038/s41598-019-57110-6)
ENSG00000162618	ADGRL4	ELTD1	PCV Endothelial Cells	Rubenstein (2020; DOI:10.1038/s41598-019-57110-6)
ENSG00000163762	TM4SF18		PCV Endothelial Cells	Rubenstein (2020; DOI:10.1038/s41598-019-57110-6)
ENSG00000231389	HLA-DPA1		PCV Endothelial Cells	Rubenstein (2020; DOI:10.1038/s41598-019-57110-6)
ENSG00000204257	HLA-DMA		PCV Endothelial Cells	Rubenstein (2020; DOI:10.1038/s41598-019-57110-6)
ENSG00000205542	TMSB4X		PCV Endothelial Cells	Rubenstein (2020; DOI:10.1038/s41598-019-57110-6)
ENSG00000223865	HLA-DPB1		PCV Endothelial Cells	Rubenstein (2020; DOI:10.1038/s41598-019-57110-6)
ENSG00000133574	GIMAP4		PCV Endothelial Cells	Rubenstein (2020; DOI:10.1038/s41598-019-57110-6)
ENSG00000088832	FKBP1A		PCV Endothelial Cells	Rubenstein (2020; DOI:10.1038/s41598-019-57110-6)
ENSG00000120885	CLU		PCV Endothelial Cells	Rubenstein (2020; DOI:10.1038/s41598-019-57110-6)
ENSG00000156508	EEF1A1		PCV Endothelial Cells	Rubenstein (2020; DOI:10.1038/s41598-019-57110-6)
ENSG00000213088	ACKR1	DARC	PCV Endothelial Cells	Rubenstein (2020; DOI:10.1038/s41598-019-57110-6)
ENSG00000276409	CCL14		PCV Endothelial Cells	Rubenstein (2020; DOI:10.1038/s41598-019-57110-6)
ENSG00000130300	PLVAP		PCV Endothelial Cells	Rubenstein (2020; DOI:10.1038/s41598-019-57110-6)
ENSG00000104368	PLAT		PCV Endothelial Cells	Rubenstein (2020; DOI:10.1038/s41598-019-57110-6)
ENSG00000196735	HLA-DQA1		PCV Endothelial Cells	Rubenstein (2020; DOI:10.1038/s41598-019-57110-6)
ENSG00000122679	RAMP3		PCV Endothelial Cells	Rubenstein (2020; DOI:10.1038/s41598-019-57110-6)
ENSG00000112378	PERP		PCV Endothelial Cells	Rubenstein (2020; DOI:10.1038/s41598-019-57110-6)
ENSG00000163072	NOSTRIN		PCV Endothelial Cells	Rubenstein (2020; DOI:10.1038/s41598-019-57110-6)
ENSG00000179344	HLA-DQB1		PCV Endothelial Cells	Rubenstein (2020; DOI:10.1038/s41598-019-57110-6)
ENSG00000154721	JAM2		PCV Endothelial Cells	Rubenstein (2020; DOI:10.1038/s41598-019-57110-6)
ENSG00000074590	NUAK1		PCV Endothelial Cells	Rubenstein (2020; DOI:10.1038/s41598-019-57110-6)
ENSG00000158716	DUSP23		PCV Endothelial Cells	Rubenstein (2020; DOI:10.1038/s41598-019-57110-6)
ENSG00000137509	PRCP		PCV Endothelial Cells	Rubenstein (2020; DOI:10.1038/s41598-019-57110-6)
ENSG00000145708	CRHBP		PCV Endothelial Cells	Rubenstein (2020; DOI:10.1038/s41598-019-57110-6)
ENSG00000144283	PKP4		PCV Endothelial Cells	Rubenstein (2020; DOI:10.1038/s41598-019-57110-6)
ENSG00000198355	PIM3		PCV Endothelial Cells	Rubenstein (2020; DOI:10.1038/s41598-019-57110-6)
ENSG00000233016	SNHG7		PCV Endothelial Cells	Rubenstein (2020; DOI:10.1038/s41598-019-57110-6)
ENSG00000156298	TSPAN7		PCV Endothelial Cells	Rubenstein (2020; DOI:10.1038/s41598-019-57110-6)
ENSG00000107281	NPDC1		PCV Endothelial Cells	Rubenstein (2020; DOI:10.1038/s41598-019-57110-6)
ENSG00000113594	LIFR		PCV Endothelial Cells	Rubenstein (2020; DOI:10.1038/s41598-019-57110-6)
ENSG00000089327	FXYD5		PCV Endothelial Cells	Rubenstein (2020; DOI:10.1038/s41598-019-57110-6)
ENSG00000124785	NRN1		PCV Endothelial Cells	Rubenstein (2020; DOI:10.1038/s41598-019-57110-6)
ENSG00000204161	TMEM273	C10orf128	PCV Endothelial Cells	Rubenstein (2020; DOI:10.1038/s41598-019-57110-6)
ENSG00000071282	LMCD1		PCV Endothelial Cells	Rubenstein (2020; DOI:10.1038/s41598-019-57110-6)
ENSG00000145632	PLK2		PCV Endothelial Cells	Rubenstein (2020; DOI:10.1038/s41598-019-57110-6)
ENSG00000143669	LYST		PCV Endothelial Cells	Rubenstein (2020; DOI:10.1038/s41598-019-57110-6)
ENSG00000163513	TGFBR2		PCV Endothelial Cells	Rubenstein (2020; DOI:10.1038/s41598-019-57110-6)
ENSG00000137033	IL33		PCV Endothelial Cells	Rubenstein (2020; DOI:10.1038/s41598-019-57110-6)
ENSG00000157557	ETS2		PCV Endothelial Cells	Rubenstein (2020; DOI:10.1038/s41598-019-57110-6)
ENSG00000182463	TSHZ2		PCV Endothelial Cells	Rubenstein (2020; DOI:10.1038/s41598-019-57110-6)
ENSG00000178695	KCTD12		PCV Endothelial Cells	Rubenstein (2020; DOI:10.1038/s41598-019-57110-6)
ENSG00000157554	ERG		PCV Endothelial Cells	Rubenstein (2020; DOI:10.1038/s41598-019-57110-6)
ENSG00000059804	SLC2A3		PCV Endothelial Cells	Rubenstein (2020; DOI:10.1038/s41598-019-57110-6)
ENSG00000124831	LRRFIP1		PCV Endothelial Cells	Rubenstein (2020; DOI:10.1038/s41598-019-57110-6)
ENSG00000134954	ETS1		T and B Cells	Rubenstein (2020; DOI:10.1038/s41598-019-57110-6)
ENSG00000130755	GMFG		T and B Cells	Rubenstein (2020; DOI:10.1038/s41598-019-57110-6)
ENSG00000157514	TSC22D3		T and B Cells	Rubenstein (2020; DOI:10.1038/s41598-019-57110-6)
ENSG00000171223	JUNB		T and B Cells	Rubenstein (2020; DOI:10.1038/s41598-019-57110-6)
ENSG00000135486	HNRNPA1		T and B Cells	Rubenstein (2020; DOI:10.1038/s41598-019-57110-6)
ENSG00000111716	LDHB		T and B Cells	Rubenstein (2020; DOI:10.1038/s41598-019-57110-6)
ENSG00000156508	EEF1A1		T and B Cells	Rubenstein (2020; DOI:10.1038/s41598-019-57110-6)
ENSG00000181163	NPM1		T and B Cells	Rubenstein (2020; DOI:10.1038/s41598-019-57110-6)
ENSG00000114942	EEF1B2		T and B Cells	Rubenstein (2020; DOI:10.1038/s41598-019-57110-6)
ENSG00000133872	SARAF	TMEM66	T and B Cells	Rubenstein (2020; DOI:10.1038/s41598-019-57110-6)
ENSG00000070756	PABPC1		T and B Cells	Rubenstein (2020; DOI:10.1038/s41598-019-57110-6)
ENSG00000221983	UBA52		T and B Cells	Rubenstein (2020; DOI:10.1038/s41598-019-57110-6)
ENSG00000111348	ARHGDIB		T and B Cells	Rubenstein (2020; DOI:10.1038/s41598-019-57110-6)
ENSG00000142669	SH3BGRL3		T and B Cells	Rubenstein (2020; DOI:10.1038/s41598-019-57110-6)
ENSG00000126264	HCST		T and B Cells	Rubenstein (2020; DOI:10.1038/s41598-019-57110-6)
ENSG00000102879	CORO1A		T and B Cells	Rubenstein (2020; DOI:10.1038/s41598-019-57110-6)
ENSG00000081237	PTPRC		T and B Cells	Rubenstein (2020; DOI:10.1038/s41598-019-57110-6)
ENSG00000182866	LCK		T and B Cells	Rubenstein (2020; DOI:10.1038/s41598-019-57110-6)
ENSG00000175463	TBC1D10C		T and B Cells	Rubenstein (2020; DOI:10.1038/s41598-019-57110-6)
ENSG00000136490	LIMD2		T and B Cells	Rubenstein (2020; DOI:10.1038/s41598-019-57110-6)
ENSG00000082074	FYB1	FYB	T and B Cells	Rubenstein (2020; DOI:10.1038/s41598-019-57110-6)
ENSG00000162511	LAPTM5		T and B Cells	Rubenstein (2020; DOI:10.1038/s41598-019-57110-6)
ENSG00000196405	EVL		T and B Cells	Rubenstein (2020; DOI:10.1038/s41598-019-57110-6)
ENSG00000104894	CD37		T and B Cells	Rubenstein (2020; DOI:10.1038/s41598-019-57110-6)
ENSG00000146386	ABRACL		T and B Cells	Rubenstein (2020; DOI:10.1038/s41598-019-57110-6)
ENSG00000197622	CDC42SE1		T and B Cells	Rubenstein (2020; DOI:10.1038/s41598-019-57110-6)
ENSG00000169442	CD52		T and B Cells	Rubenstein (2020; DOI:10.1038/s41598-019-57110-6)
ENSG00000143443	C1orf56		T and B Cells	Rubenstein (2020; DOI:10.1038/s41598-019-57110-6)
ENSG00000101109	STK4		T and B Cells	Rubenstein (2020; DOI:10.1038/s41598-019-57110-6)
ENSG00000133639	BTG1		T and B Cells	Rubenstein (2020; DOI:10.1038/s41598-019-57110-6)
ENSG00000123349	PFDN5		T and B Cells	Rubenstein (2020; DOI:10.1038/s41598-019-57110-6)
ENSG00000168685	IL7R		T and B Cells	Rubenstein (2020; DOI:10.1038/s41598-019-57110-6)
ENSG00000198851	CD3E		T and B Cells	Rubenstein (2020; DOI:10.1038/s41598-019-57110-6)
ENSG00000121966	CXCR4		T and B Cells	Rubenstein (2020; DOI:10.1038/s41598-019-57110-6)
ENSG00000009790	TRAF3IP3		T and B Cells	Rubenstein (2020; DOI:10.1038/s41598-019-57110-6)
ENSG00000172183	ISG20		T and B Cells	Rubenstein (2020; DOI:10.1038/s41598-019-57110-6)
ENSG00000103187	COTL1		T and B Cells	Rubenstein (2020; DOI:10.1038/s41598-019-57110-6)
ENSG00000026297	RNASET2		T and B Cells	Rubenstein (2020; DOI:10.1038/s41598-019-57110-6)
ENSG00000142546	NOSIP		T and B Cells	Rubenstein (2020; DOI:10.1038/s41598-019-57110-6)
ENSG00000127184	COX7C		T and B Cells	Rubenstein (2020; DOI:10.1038/s41598-019-57110-6)
ENSG00000131055	COX4I2		Smooth Muscle Cells	Rubenstein (2020; DOI:10.1038/s41598-019-57110-6)
ENSG00000101335	MYL9		Smooth Muscle Cells	Rubenstein (2020; DOI:10.1038/s41598-019-57110-6)
ENSG00000107796	ACTA2		Smooth Muscle Cells	Rubenstein (2020; DOI:10.1038/s41598-019-57110-6)
ENSG00000076706	MCAM		Smooth Muscle Cells	Rubenstein (2020; DOI:10.1038/s41598-019-57110-6)
ENSG00000105655	ISYNA1		Smooth Muscle Cells	Rubenstein (2020; DOI:10.1038/s41598-019-57110-6)
ENSG00000149591	TAGLN		Smooth Muscle Cells	Rubenstein (2020; DOI:10.1038/s41598-019-57110-6)
ENSG00000198467	TPM2		Smooth Muscle Cells	Rubenstein (2020; DOI:10.1038/s41598-019-57110-6)
ENSG00000173267	SNCG		Smooth Muscle Cells	Rubenstein (2020; DOI:10.1038/s41598-019-57110-6)
ENSG00000213145	CRIP1		Smooth Muscle Cells	Rubenstein (2020; DOI:10.1038/s41598-019-57110-6)
ENSG00000148053	NTRK2		Smooth Muscle Cells	Rubenstein (2020; DOI:10.1038/s41598-019-57110-6)
ENSG00000111404	RERGL		Smooth Muscle Cells	Rubenstein (2020; DOI:10.1038/s41598-019-57110-6)
ENSG00000133392	MYH11		Smooth Muscle Cells	Rubenstein (2020; DOI:10.1038/s41598-019-57110-6)
ENSG00000198523	PLN		Smooth Muscle Cells	Rubenstein (2020; DOI:10.1038/s41598-019-57110-6)
ENSG00000118729	CASQ2		Smooth Muscle Cells	Rubenstein (2020; DOI:10.1038/s41598-019-57110-6)
ENSG00000163017	ACTG2		Smooth Muscle Cells	Rubenstein (2020; DOI:10.1038/s41598-019-57110-6)
ENSG00000105894	PTN		Smooth Muscle Cells	Rubenstein (2020; DOI:10.1038/s41598-019-57110-6)
ENSG00000181649	PHLDA2		Smooth Muscle Cells	Rubenstein (2020; DOI:10.1038/s41598-019-57110-6)
ENSG00000168032	ENTPD3		Smooth Muscle Cells	Rubenstein (2020; DOI:10.1038/s41598-019-57110-6)
ENSG00000213626	LBH		Smooth Muscle Cells	Rubenstein (2020; DOI:10.1038/s41598-019-57110-6)
ENSG00000172348	RCAN2		Smooth Muscle Cells	Rubenstein (2020; DOI:10.1038/s41598-019-57110-6)
ENSG00000065911	MTHFD2		Smooth Muscle Cells	Rubenstein (2020; DOI:10.1038/s41598-019-57110-6)
ENSG00000130176	CNN1		Smooth Muscle Cells	Rubenstein (2020; DOI:10.1038/s41598-019-57110-6)
ENSG00000154556	SORBS2		Smooth Muscle Cells	Rubenstein (2020; DOI:10.1038/s41598-019-57110-6)
ENSG00000065534	MYLK		Smooth Muscle Cells	Rubenstein (2020; DOI:10.1038/s41598-019-57110-6)
ENSG00000156265	MAP3K7CL		Smooth Muscle Cells	Rubenstein (2020; DOI:10.1038/s41598-019-57110-6)
ENSG00000151468	CCDC3		Smooth Muscle Cells	Rubenstein (2020; DOI:10.1038/s41598-019-57110-6)
ENSG00000162998	FRZB		Smooth Muscle Cells	Rubenstein (2020; DOI:10.1038/s41598-019-57110-6)
ENSG00000267280	TBX2-AS1	RP11-332H18.4	Smooth Muscle Cells	Rubenstein (2020; DOI:10.1038/s41598-019-57110-6)
ENSG00000169507	SLC38A11		Smooth Muscle Cells	Rubenstein (2020; DOI:10.1038/s41598-019-57110-6)
ENSG00000077943	ITGA8		Smooth Muscle Cells	Rubenstein (2020; DOI:10.1038/s41598-019-57110-6)
ENSG00000145936	KCNMB1		Smooth Muscle Cells	Rubenstein (2020; DOI:10.1038/s41598-019-57110-6)
ENSG00000077157	PPP1R12B		Smooth Muscle Cells	Rubenstein (2020; DOI:10.1038/s41598-019-57110-6)
ENSG00000164116	GUCY1A1	GUCY1A3	Smooth Muscle Cells	Rubenstein (2020; DOI:10.1038/s41598-019-57110-6)
ENSG00000182492	BGN		Smooth Muscle Cells	Rubenstein (2020; DOI:10.1038/s41598-019-57110-6)
ENSG00000184347	SLIT3		Smooth Muscle Cells	Rubenstein (2020; DOI:10.1038/s41598-019-57110-6)
ENSG00000173848	NET1		Smooth Muscle Cells	Rubenstein (2020; DOI:10.1038/s41598-019-57110-6)
ENSG00000143333	RGS16		Smooth Muscle Cells	Rubenstein (2020; DOI:10.1038/s41598-019-57110-6)
ENSG00000109610	SOD3		Smooth Muscle Cells	Rubenstein (2020; DOI:10.1038/s41598-019-57110-6)
ENSG00000163431	LMOD1		Smooth Muscle Cells	Rubenstein (2020; DOI:10.1038/s41598-019-57110-6)
ENSG00000165996	HACD1	PTPLA	Smooth Muscle Cells	Rubenstein (2020; DOI:10.1038/s41598-019-57110-6)
ENSG00000151617	EDNRA		Smooth Muscle Cells	Rubenstein (2020; DOI:10.1038/s41598-019-57110-6)
ENSG00000170412	GPRC5C		Smooth Muscle Cells	Rubenstein (2020; DOI:10.1038/s41598-019-57110-6)
ENSG00000107242	PIP5K1B		Smooth Muscle Cells	Rubenstein (2020; DOI:10.1038/s41598-019-57110-6)
ENSG00000213160	KLHL23		Smooth Muscle Cells	Rubenstein (2020; DOI:10.1038/s41598-019-57110-6)
ENSG00000166165	CKB		Smooth Muscle Cells	Rubenstein (2020; DOI:10.1038/s41598-019-57110-6)
ENSG00000121068	TBX2		Smooth Muscle Cells	Rubenstein (2020; DOI:10.1038/s41598-019-57110-6)
ENSG00000166831	RBPMS2		Smooth Muscle Cells	Rubenstein (2020; DOI:10.1038/s41598-019-57110-6)
ENSG00000150687	PRSS23		Smooth Muscle Cells	Rubenstein (2020; DOI:10.1038/s41598-019-57110-6)
ENSG00000158869	FCER1G		Myeloid Cells	Rubenstein (2020; DOI:10.1038/s41598-019-57110-6)
ENSG00000011600	TYROBP		Myeloid Cells	Rubenstein (2020; DOI:10.1038/s41598-019-57110-6)
ENSG00000143110	C1orf162		Myeloid Cells	Rubenstein (2020; DOI:10.1038/s41598-019-57110-6)
ENSG00000103187	COTL1		Myeloid Cells	Rubenstein (2020; DOI:10.1038/s41598-019-57110-6)
ENSG00000090382	LYZ		Myeloid Cells	Rubenstein (2020; DOI:10.1038/s41598-019-57110-6)
ENSG00000204472	AIF1		Myeloid Cells	Rubenstein (2020; DOI:10.1038/s41598-019-57110-6)
ENSG00000163220	S100A9		Myeloid Cells	Rubenstein (2020; DOI:10.1038/s41598-019-57110-6)
ENSG00000204482	LST1		Myeloid Cells	Rubenstein (2020; DOI:10.1038/s41598-019-57110-6)
ENSG00000085265	FCN1		Myeloid Cells	Rubenstein (2020; DOI:10.1038/s41598-019-57110-6)
ENSG00000172243	CLEC7A		Myeloid Cells	Rubenstein (2020; DOI:10.1038/s41598-019-57110-6)
ENSG00000197249	SERPINA1		Myeloid Cells	Rubenstein (2020; DOI:10.1038/s41598-019-57110-6)
ENSG00000140749	IGSF6		Myeloid Cells	Rubenstein (2020; DOI:10.1038/s41598-019-57110-6)
ENSG00000110077	MS4A6A		Myeloid Cells	Rubenstein (2020; DOI:10.1038/s41598-019-57110-6)
ENSG00000101336	HCK		Myeloid Cells	Rubenstein (2020; DOI:10.1038/s41598-019-57110-6)
ENSG00000066336	SPI1		Myeloid Cells	Rubenstein (2020; DOI:10.1038/s41598-019-57110-6)
ENSG00000166927	MS4A7		Myeloid Cells	Rubenstein (2020; DOI:10.1038/s41598-019-57110-6)
ENSG00000197629	MPEG1		Myeloid Cells	Rubenstein (2020; DOI:10.1038/s41598-019-57110-6)
ENSG00000197405	C5AR1		Myeloid Cells	Rubenstein (2020; DOI:10.1038/s41598-019-57110-6)
ENSG00000198223	CSF2RA		Myeloid Cells	Rubenstein (2020; DOI:10.1038/s41598-019-57110-6)
ENSG00000165168	CYBB		Myeloid Cells	Rubenstein (2020; DOI:10.1038/s41598-019-57110-6)
ENSG00000160593	JAML	AMICA1	Myeloid Cells	Rubenstein (2020; DOI:10.1038/s41598-019-57110-6)
ENSG00000169413	RNASE6		Myeloid Cells	Rubenstein (2020; DOI:10.1038/s41598-019-57110-6)
ENSG00000116741	RGS2		Myeloid Cells	Rubenstein (2020; DOI:10.1038/s41598-019-57110-6)
ENSG00000085514	PILRA		Myeloid Cells	Rubenstein (2020; DOI:10.1038/s41598-019-57110-6)
ENSG00000163131	CTSS		Myeloid Cells	Rubenstein (2020; DOI:10.1038/s41598-019-57110-6)
ENSG00000076944	STXBP2		Myeloid Cells	Rubenstein (2020; DOI:10.1038/s41598-019-57110-6)
ENSG00000102524	TNFSF13B		Myeloid Cells	Rubenstein (2020; DOI:10.1038/s41598-019-57110-6)
ENSG00000112149	CD83		Myeloid Cells	Rubenstein (2020; DOI:10.1038/s41598-019-57110-6)
ENSG00000163563	MNDA		Myeloid Cells	Rubenstein (2020; DOI:10.1038/s41598-019-57110-6)
ENSG00000011422	PLAUR		Myeloid Cells	Rubenstein (2020; DOI:10.1038/s41598-019-57110-6)
ENSG00000059377	TBXAS1		Myeloid Cells	Rubenstein (2020; DOI:10.1038/s41598-019-57110-6)
ENSG00000170458	CD14		Myeloid Cells	Rubenstein (2020; DOI:10.1038/s41598-019-57110-6)
ENSG00000109061	MYH1		Fast-twitch	Rubenstein (2020; DOI:10.1038/s41598-019-57110-6); Smith (2013; DOI:10.1002/wsbm.1197)
ENSG00000125414	MYH2		Fast-twitch	Rubenstein (2020; DOI:10.1038/s41598-019-57110-6); Smith (2013; DOI:10.1002/wsbm.1197)
ENSG00000168530	MYL1		Fast-twitch	Rubenstein (2020; DOI:10.1038/s41598-019-57110-6); Smith (2013; DOI:10.1002/wsbm.1197)
ENSG00000130595	TNNT3		Fast-twitch	Rubenstein (2020; DOI:10.1038/s41598-019-57110-6); Smith (2013; DOI:10.1002/wsbm.1197)
ENSG00000130598	TNNI2		Fast-twitch	Rubenstein (2020; DOI:10.1038/s41598-019-57110-6); Smith (2013; DOI:10.1002/wsbm.1197)
ENSG00000101470	TNNC2		Fast-twitch	Rubenstein (2020; DOI:10.1038/s41598-019-57110-6); Smith (2013; DOI:10.1002/wsbm.1197)
ENSG00000140416	TPM1		Fast-twitch	Rubenstein (2020; DOI:10.1038/s41598-019-57110-6); Smith (2013; DOI:10.1002/wsbm.1197)
ENSG00000196296	ATP2A1		Fast-twitch	Rubenstein (2020; DOI:10.1038/s41598-019-57110-6); Smith (2013; DOI:10.1002/wsbm.1197)
ENSG00000143318	CASQ1		Fast-twitch	Smith (2013; DOI:10.1002/wsbm.1197)
ENSG00000149925	ALDOA		Fast-twitch	Rubenstein (2020; DOI:10.1038/s41598-019-57110-6)
ENSG00000145358	DDIT4L		Fast-twitch	Rubenstein (2020; DOI:10.1038/s41598-019-57110-6)
ENSG00000108515	ENO3		Fast-twitch	Rubenstein (2020; DOI:10.1038/s41598-019-57110-6)
ENSG00000123689	G0S2		Fast-twitch	Rubenstein (2020; DOI:10.1038/s41598-019-57110-6)
ENSG00000111640	GAPDH		Fast-twitch	Rubenstein (2020; DOI:10.1038/s41598-019-57110-6)
ENSG00000134333	LDHA		Fast-twitch	Rubenstein (2020; DOI:10.1038/s41598-019-57110-6)
ENSG00000086967	MYBPC2		Fast-twitch	Rubenstein (2020; DOI:10.1038/s41598-019-57110-6)
ENSG00000180209	MYLPF		Fast-twitch	Rubenstein (2020; DOI:10.1038/s41598-019-57110-6)
ENSG00000152556	PFKM		Fast-twitch	Rubenstein (2020; DOI:10.1038/s41598-019-57110-6)
ENSG00000079739	PGM1		Fast-twitch	Rubenstein (2020; DOI:10.1038/s41598-019-57110-6)
ENSG00000067225	PKM		Fast-twitch	Rubenstein (2020; DOI:10.1038/s41598-019-57110-6)
ENSG00000170290	SLN		Fast-twitch	Rubenstein (2020; DOI:10.1038/s41598-019-57110-6)
ENSG00000092054	MYH7		Slow-twitch	Rubenstein (2020; DOI:10.1038/s41598-019-57110-6); Smith (2013; DOI:10.1002/wsbm.1197)
ENSG00000111245	MYL2		Slow-twitch	Rubenstein (2020; DOI:10.1038/s41598-019-57110-6); Smith (2013; DOI:10.1002/wsbm.1197)
ENSG00000160808	MYL3		Slow-twitch	Rubenstein (2020; DOI:10.1038/s41598-019-57110-6); Smith (2013; DOI:10.1002/wsbm.1197)
ENSG00000105048	TNNT1		Slow-twitch	Rubenstein (2020; DOI:10.1038/s41598-019-57110-6); Smith (2013; DOI:10.1002/wsbm.1197)
ENSG00000159173	TNNI1		Slow-twitch	Rubenstein (2020; DOI:10.1038/s41598-019-57110-6); Smith (2013; DOI:10.1002/wsbm.1197)
ENSG00000114854	TNNC1		Slow-twitch	Rubenstein (2020; DOI:10.1038/s41598-019-57110-6); Smith (2013; DOI:10.1002/wsbm.1197)
ENSG00000143549	TPM3		Slow-twitch	Rubenstein (2020; DOI:10.1038/s41598-019-57110-6); Smith (2013; DOI:10.1002/wsbm.1197)
ENSG00000136842	TMOD1		Slow-twitch	Smith (2013; DOI:10.1002/wsbm.1197)
ENSG00000174437	ATP2A2		Slow-twitch	Rubenstein (2020; DOI:10.1038/s41598-019-57110-6); Smith (2013; DOI:10.1002/wsbm.1197)
ENSG00000118729	CASQ2		Slow-twitch	Rubenstein (2020; DOI:10.1038/s41598-019-57110-6); Smith (2013; DOI:10.1002/wsbm.1197)
ENSG00000165887	ANKRD2		Slow-twitch	Rubenstein (2020; DOI:10.1038/s41598-019-57110-6)
ENSG00000164879	CA3		Slow-twitch	Rubenstein (2020; DOI:10.1038/s41598-019-57110-6)
ENSG00000135218	CD36		Slow-twitch	Rubenstein (2020; DOI:10.1038/s41598-019-57110-6)
ENSG00000159348	CYB5R1		Slow-twitch	Rubenstein (2020; DOI:10.1038/s41598-019-57110-6)
ENSG00000121769	FABP3		Slow-twitch	Rubenstein (2020; DOI:10.1038/s41598-019-57110-6)
ENSG00000111716	LDHB		Slow-twitch	Rubenstein (2020; DOI:10.1038/s41598-019-57110-6)
ENSG00000101608	MYL12A		Slow-twitch	Rubenstein (2020; DOI:10.1038/s41598-019-57110-6)
ENSG00000196465	MYL6B		Slow-twitch	Rubenstein (2020; DOI:10.1038/s41598-019-57110-6)
ENSG00000172399	MYOZ2		Slow-twitch	Rubenstein (2020; DOI:10.1038/s41598-019-57110-6)
ENSG00000107438	PDLIM1		Slow-twitch	Rubenstein (2020; DOI:10.1038/s41598-019-57110-6)
ENSG00000198523	PLN		Slow-twitch	Rubenstein (2020; DOI:10.1038/s41598-019-57110-6)
ENSG00000108821	COL1A1		Tendon	Kendal (2019; DOI:10.1101/2019.12.09.869933); Orfei (2019; DOI:10.3390/ijms20010149)
ENSG00000164692	COL1A2		Tendon	Kendal (2019; DOI:10.1101/2019.12.09.869933); Orfei (2019; DOI:10.3390/ijms20010149)
ENSG00000166147	FBN1		Tendon	Kendal (2019; DOI:10.1101/2019.12.09.869933); Orfei (2019; DOI:10.3390/ijms20010149)
ENSG00000197614	MFAP5		Tendon	Kendal (2019; DOI:10.1101/2019.12.09.869933); Orfei (2019; DOI:10.3390/ijms20010149)
ENSG00000038427	VCAN		Tendon	Kendal (2019; DOI:10.1101/2019.12.09.869933); Orfei (2019; DOI:10.3390/ijms20010149)
ENSG00000138080	EMILIN1		Tendon	Kendal (2019; DOI:10.1101/2019.12.09.869933); Orfei (2019; DOI:10.3390/ijms20010149)
ENSG00000105329	TGFB1		Tendon	Kendal (2019; DOI:10.1101/2019.12.09.869933); Orfei (2019; DOI:10.3390/ijms20010149)
ENSG00000049323	LTBP1		Tendon	Kendal (2019; DOI:10.1101/2019.12.09.869933); Orfei (2019; DOI:10.3390/ijms20010149)
ENSG00000119681	LTBP2		Tendon	Kendal (2019; DOI:10.1101/2019.12.09.869933); Orfei (2019; DOI:10.3390/ijms20010149)
ENSG00000168542	COL3A1		Tendon	Kendal (2019; DOI:10.1101/2019.12.09.869933); Orfei (2019; DOI:10.3390/ijms20010149)
ENSG00000148180	GSN		Tendon	Kendal (2019; DOI:10.1101/2019.12.09.869933); Orfei (2019; DOI:10.3390/ijms20010149)
ENSG00000139329	LUM		Tendon	Kendal (2019; DOI:10.1101/2019.12.09.869933); Orfei (2019; DOI:10.3390/ijms20010149)
ENSG00000011465	DCN		Tendon	Kendal (2019; DOI:10.1101/2019.12.09.869933); Orfei (2019; DOI:10.3390/ijms20010149)
ENSG00000160932	LY6E		Tendon	Kendal (2019; DOI:10.1101/2019.12.09.869933); Orfei (2019; DOI:10.3390/ijms20010149)
ENSG00000134853	PDGFRA		Tendon	Kendal (2019; DOI:10.1101/2019.12.09.869933); Orfei (2019; DOI:10.3390/ijms20010149)
ENSG00000145824	CXCL14		Tendon	Kendal (2019; DOI:10.1101/2019.12.09.869933); Orfei (2019; DOI:10.3390/ijms20010149)
ENSG00000149591	TAGLN		Tendon	Kendal (2019; DOI:10.1101/2019.12.09.869933); Orfei (2019; DOI:10.3390/ijms20010149)
ENSG00000101335	MYL9		Tendon	Kendal (2019; DOI:10.1101/2019.12.09.869933); Orfei (2019; DOI:10.3390/ijms20010149)
ENSG00000107796	ACTA2		Tendon	Kendal (2019; DOI:10.1101/2019.12.09.869933); Orfei (2019; DOI:10.3390/ijms20010149)
ENSG00000143248	RGS5		Tendon	Kendal (2019; DOI:10.1101/2019.12.09.869933); Orfei (2019; DOI:10.3390/ijms20010149)
ENSG00000135424	ITGA7		Tendon	Kendal (2019; DOI:10.1101/2019.12.09.869933); Orfei (2019; DOI:10.3390/ijms20010149)
ENSG00000187498	COL4A1		Tendon	Kendal (2019; DOI:10.1101/2019.12.09.869933); Orfei (2019; DOI:10.3390/ijms20010149)
ENSG00000133110	POSTN		Tendon	Kendal (2019; DOI:10.1101/2019.12.09.869933); Orfei (2019; DOI:10.3390/ijms20010149)
ENSG00000011465	DCN		Tendon	Kendal (2019; DOI:10.1101/2019.12.09.869933); Orfei (2019; DOI:10.3390/ijms20010149)
ENSG00000150051	MKX		Tendon	Kendal (2019; DOI:10.1101/2019.12.09.869933); Orfei (2019; DOI:10.3390/ijms20010149)
ENSG00000041982	TNC		Tendon	Kendal (2019; DOI:10.1101/2019.12.09.869933); Orfei (2019; DOI:10.3390/ijms20010149)
