# Supplementary material for: A transcriptome atlas of leg muscles from healthy human volunteers reveals molecular and cellular signatures associated with muscle location
Source: eLife. 2023 Feb 6;12:e80500. doi: 10.7554/eLife.80500 (PMC9988256; doi:10.7554/eLife.80500)
Supplement: Supplementary file 4. [file elife-80500-supp4.xls]

## Sheet: overview
Supplementary Table S4. The result of differential expression analysis for transcripts.
column A (ensembl transcript id)	The id based on ensembl version 98 (http://sep2019.archive.ensembl.org/).
column B-D	Anova results to test the significance of fixed effects (F value, Pr(>F) and FDR (>F)).
column E-BO	The log2 fold change (log2FC), t.ratio and p.value from the post-hoc pairwise comparisons to identify significant differences between each pair of muscles.
abbreviations in columns E-BO:	gracilis (GR), semitendinosus middle (STM), semitendinosus distal (STD), rectus femoris (RF), vastus lateralis (VL), vastus medialis (VM) muscles, and gastrocnemius lateralis (GL).

## Sheet: SupplementaryTableS4
ensembl transcript id	F value	Pr(>F)	FDR(>F)	GL-GR Log2FC	GL-GR t.ratio	GL-GR p.value	GL-RF Log2FC	GL-RF t.ratio	GL-RF p.value	GL-STD Log2FC	GL-STD t.ratio	GL-STD p.value	GL-STM Log2FC	GL-STM t.ratio	GL-STM p.value	GL-VL Log2FC	GL-VL t.ratio	GL-VL p.value	GL-VM Log2FC	GL-VM t.ratio	GL-VM p.value	GR-RF Log2FC	GR-RF t.ratio	GR-RF p.value	GR-STD Log2FC	GR-STD t.ratio	GR-STD p.value	GR-STM Log2FC	GR-STM t.ratio	GR-STM p.value	GR-VL Log2FC	GR-VL t.ratio	GR-VL p.value	GR-VM Log2FC	GR-VM t.ratio	GR-VM p.value	RF-STD Log2FC	RF-STD t.ratio	RF-STD p.value	RF-STM Log2FC	RF-STM t.ratio	RF-STM p.value	RF-VL Log2FC	RF-VL t.ratio	RF-VL p.value	RF-VM Log2FC	RF-VM t.ratio	RF-VM p.value	STD-STM Log2FC
ENST00000000233	4.106	0.00096	0.01812	0.50469	4.03993	0.00109	0.159	1.04563	0.94327	0.26611	2.0747	0.36819	0.37736	2.69301	0.10054	0.09058	0.45397	0.99934	0.40276	2.92442	0.05397	-0.34569	-2.72304	0.09315	-0.23859	-1.89436	0.48431	-0.12733	-1.20516	0.89234	-0.41411	-3.42898	0.01105	-0.10193	-0.99265	0.95568	0.1071	0.90317	0.97214	0.21836	1.50674	0.7409	-0.06842	-0.58452	0.99725	0.24375	1.71956	0.60292	0.11125
ENST00000000412	2.36263	0.03505	0.21622	0.19285	1.51805	0.7339	-0.28557	-2.06866	0.37309	-0.05129	-0.08925	1	-0.03477	-0.26122	0.99997	-0.13162	-0.50925	0.99873	0.11408	0.81974	0.98289	-0.47842	-3.46738	0.01029	-0.24414	-1.57423	0.69893	-0.22762	-1.71601	0.60573	-0.32447	-1.96948	0.43572	-0.07877	-0.65457	0.99483	0.23428	1.94342	0.45255	0.2508	1.74431	0.58651	0.15395	1.52358	0.73056	0.39965	2.76933	0.08409	0.01652
ENST00000000442	0.32506	0.92254	0.97632	0.18238	0.34453	0.99987	-0.19012	-0.32388	0.99991	0.13047	0.55958	0.99785	0.06877	0.04541	1	0.18212	0.28312	0.99996	-0.21019	-0.6465	0.99521	-0.3725	-0.64128	0.99542	-0.05191	0.21346	0.99999	-0.11362	-0.28361	0.99996	-0.00027	-0.0493	1	-0.39257	-0.96912	0.96055	0.32059	0.84129	0.98056	0.25888	0.35219	0.99985	0.37223	0.575	0.99749	-0.02007	-0.29107	0.99995	-0.0617
ENST00000001008	4.95609	0.00017	0.00459	-0.16949	-2.10357	0.35073	-0.09935	-1.19864	0.89488	0.07245	1.30796	0.84845	-0.30228	-3.77055	0.00316	-0.07154	-0.59002	0.99711	-0.09439	-1.20149	0.8938	0.07015	0.76315	0.9883	0.24194	3.34356	0.01472	-0.13279	-1.71152	0.60835	0.09795	1.43243	0.78425	0.0751	0.8322	0.98163	0.1718	2.39007	0.2031	-0.20293	-2.34805	0.22166	0.0278	0.60527	0.99667	0.00496	0.03799	1	-0.37473
ENST00000001146	2.15803	0.05274	0.27345	0.47825	1.55872	0.70856	0.82416	2.10956	0.35573	0.27385	1.16306	0.90642	1.08746	3.26228	0.02628	0.73386	2.31089	0.24906	0.40682	1.48077	0.75564	0.3459	0.66487	0.99413	-0.2044	-0.38705	0.99972	0.6092	1.74331	0.59	0.25561	0.80601	0.98377	-0.07143	-0.03796	1	-0.5503	-1.0217	0.94767	0.2633	0.98873	0.95475	-0.0903	0.11033	1	-0.41734	-0.68736	0.993	0.8136
ENST00000002125	0.91172	0.48899	0.78207	-0.30625	-0.8152	0.98332	-0.26531	-0.5957	0.99691	-0.00112	0.11009	1	-0.18999	-0.70156	0.99244	-0.08282	-0.22648	0.99999	-0.60569	-1.89601	0.48418	0.04094	0.17278	1	0.30513	0.90345	0.97185	0.11626	0.08129	1	0.22343	0.55604	0.9979	-0.29945	-1.09394	0.92974	0.26419	0.68576	0.99332	0.07532	-0.08965	1	0.18249	0.35971	0.99983	-0.34039	-1.19921	0.8943	-0.18887
ENST00000002165	4.03091	0.00116	0.02077	0.17958	2.30139	0.24746	0.06385	1.21742	0.88698	0.27305	2.9919	0.04749	0.40456	4.33341	0.00045	0.18809	2.35571	0.22191	0.04019	0.95616	0.96273	-0.11574	-0.9376	0.96607	0.09346	0.72222	0.99112	0.22498	2.1078	0.35241	0.00851	0.12534	1	-0.13939	-1.28041	0.86043	0.2092	1.60564	0.67885	0.34071	2.90348	0.06136	0.12424	1.02993	0.9467	-0.02366	-0.28916	0.99995	0.13151
ENST00000002501	4.03172	0.00113	0.02042	-0.18649	-0.69172	0.99291	0.14141	0.8698	0.97644	-0.44246	-2.02468	0.40285	-0.34854	-1.77108	0.56946	0.3395	1.83039	0.52993	0.24911	1.08623	0.9313	0.3279	1.50229	0.74307	-0.25598	-1.33116	0.83646	-0.16206	-1.09757	0.92807	0.52599	2.47714	0.17545	0.4356	1.74241	0.58878	-0.58388	-2.70891	0.10291	-0.48996	-2.47105	0.1778	0.19809	0.86674	0.97682	0.10769	0.17546	1	0.09392
ENST00000002596	2.37657	0.03435	0.21384	0.15493	1.25165	0.86926	0.48555	2.83674	0.09438	0.11703	1.06844	0.9338	0.34128	2.05732	0.39812	0.26562	1.87612	0.50686	0.54438	3.22298	0.03777	0.33061	1.66881	0.64021	-0.0379	-0.16911	1	0.18635	0.83616	0.97926	0.11068	0.6716	0.99345	0.38945	2.01843	0.42088	-0.36851	-1.80837	0.55118	-0.14426	-0.84765	0.9777	-0.21993	-0.98224	0.95475	0.05884	0.28385	0.99995	0.22425
ENST00000002829	1.19925	0.31252	0.65476	0.22791	1.53401	0.72409	0.13889	0.98321	0.95739	0.29089	1.65399	0.64721	0.44166	2.31392	0.24117	0.11572	0.85805	0.97833	0.10762	0.46942	0.9992	-0.08903	-0.4492	0.99937	0.06298	0.14796	1	0.21375	0.84326	0.98007	-0.1122	-0.62433	0.996	-0.1203	-1.0082	0.95193	0.152	0.58018	0.99733	0.30277	1.22835	0.88259	-0.02317	-0.15054	1	-0.03127	-0.51096	0.99869	0.15077
ENST00000003302	0.46495	0.83285	0.94431	-0.19632	-0.47568	0.99914	-0.10459	-0.2881	0.99995	0.15382	0.3156	0.99992	-0.38155	-0.92509	0.96851	-0.2047	-0.55647	0.99791	0.0819	0.45175	0.99936	0.09173	0.15423	1	0.35014	0.77193	0.98751	-0.18523	-0.45821	0.9993	-0.00837	-0.09495	1	0.27822	0.90752	0.97137	0.25841	0.5732	0.99752	-0.27696	-0.57848	0.9974	-0.10011	-0.23869	0.99998	0.18649	0.70114	0.99252	-0.53537
ENST00000003912	0.73917	0.61919	0.85197	-0.36759	-0.5598	0.99746	1.52731	1.32821	0.8262	0.68052	1.10221	0.91989	0.48012	0.33461	0.99985	0.83926	0.99626	0.9488	0.80857	0.36927	0.99975	1.8949	1.82767	0.55687	1.04811	1.64085	0.65946	0.84771	0.86314	0.97397	1.20686	1.51356	0.73404	1.17617	0.88349	0.97119	-0.84679	-0.29431	0.99992	-1.04719	-0.96536	0.95106	-0.68805	-0.34308	0.9998	-0.71874	-0.909	0.96308	-0.2004
ENST00000004103	1.04181	0.40264	0.72573	-0.16907	0.02019	1	0.17562	0.56215	0.99751	-0.63097	-0.96636	0.95876	-0.03873	0.12613	1	0.36094	0.82741	0.98042	0.69439	1.37743	0.80962	0.34469	0.54333	0.99794	-0.4619	-0.98586	0.95464	0.13034	0.10644	1	0.53001	0.80803	0.98263	0.86346	1.3583	0.81925	-0.80659	-1.46046	0.76587	-0.21435	-0.4311	0.99944	0.18532	0.24018	0.99998	0.51877	0.76268	0.98695	0.59224
ENST00000004982	2.82323	0.01378	0.12101	-0.28344	-1.21333	0.88929	0.08864	0.25939	0.99998	0.364	1.7203	0.60232	-0.46021	-1.95164	0.44593	-0.02287	-0.10344	1	0.16386	0.78947	0.98604	0.37208	1.37523	0.81523	0.64744	2.87833	0.06097	-0.17677	-0.76856	0.98788	0.26057	1.06204	0.93906	0.4473	1.9514	0.44609	0.27536	1.34895	0.82865	-0.54885	-2.05295	0.38116	-0.11151	-0.34667	0.99986	0.07522	0.48304	0.99907	-0.82421
ENST00000005082	0.76131	0.60189	0.84325	0.93766	1.31535	0.83906	0.34823	0.24539	0.99998	1.00924	0.87396	0.97351	-0.17722	-0.27811	0.99996	-0.57145	-0.57541	0.99725	0.35881	0.5392	0.99803	-0.58943	-0.97094	0.95593	0.07158	-0.39066	0.99965	-1.11488	-1.53899	0.71979	-1.5091	-1.83872	0.53336	-0.57884	-0.73256	0.98918	0.66101	0.57373	0.99706	-0.52545	-0.4911	0.99882	-0.91967	-0.76259	0.98724	0.01059	0.2609	0.99997	-1.18646
ENST00000005178	7.50436	0	8e-05	0.14891	0.22508	0.99999	-0.835	-3.3135	0.01613	0.09826	0.45816	0.99931	-0.44321	-2.83691	0.06851	-0.95948	-4.48542	0.00015	-0.43148	-2.01231	0.40678	-0.98391	-3.50103	0.00846	-0.05065	0.23513	0.99999	-0.59212	-3.01549	0.04122	-1.10839	-4.64884	7e-05	-0.58039	-2.21447	0.28766	0.93326	3.63327	0.00524	0.39179	0.44728	0.9994	-0.12448	-1.00625	0.95276	0.40352	1.28305	0.85995	-0.54148
ENST00000005257	1.98545	0.07423	0.32933	0.16781	1.92638	0.46341	0.20422	2.08752	0.36119	0.21037	2.44323	0.18229	0.20168	2.18979	0.30243	0.22924	2.64379	0.11458	0.0593	0.71484	0.99171	0.03641	0.28577	0.99996	0.04255	0.53466	0.99833	0.03387	0.3264	0.9999	0.06143	0.77045	0.98765	-0.10851	-1.14957	0.91233	0.00615	0.21991	0.99999	-0.00254	0.0299	1	0.02502	0.44712	0.9994	-0.14492	-1.35893	0.82337	-0.00869
ENST00000005259	0.89566	0.50049	0.7895	-0.48873	-0.75496	0.98866	0.01421	-0.02328	1	-0.56274	-1.37235	0.81566	-0.44635	-1.11301	0.92321	-0.6873	-1.12147	0.92074	0.2113	0.42793	0.99951	0.50294	0.67295	0.99386	-0.07401	-0.63763	0.99546	0.04237	-0.38826	0.99973	-0.19858	-0.38665	0.99973	0.70003	1.15312	0.91011	-0.57695	-1.24233	0.8763	-0.46056	-1.00738	0.95155	-0.70151	-1.01254	0.95049	0.19709	0.42205	0.99955	0.11639
ENST00000005260	6.67609	1e-05	0.00027	0.69609	4.65297	0.00021	-0.09132	-0.50316	0.99878	0.29764	1.89721	0.48652	0.33247	1.90824	0.47978	0.07727	0.51091	0.99867	-0.15627	-0.85011	0.97903	-0.78741	-4.85015	9e-05	-0.39845	-2.65677	0.12249	-0.36362	-2.56027	0.15271	-0.61882	-3.97101	0.00256	-0.85236	-5.34919	1e-05	0.38896	2.25797	0.2738	0.42379	2.26494	0.27114	0.16859	0.95981	0.96157	-0.06495	-0.3033	0.99993	0.03483
ENST00000005286	1.92831	0.08153	0.34463	-0.05313	-0.08791	1	1.22333	1.33397	0.83169	-0.42444	-0.49628	0.99883	1.17235	1.94601	0.46487	0.37125	0.46638	0.99916	-0.74284	-1.09217	0.92861	1.27646	1.39498	0.8009	-0.37131	-0.40091	0.99965	1.22548	2.00239	0.4313	0.42438	0.54239	0.99803	-0.68971	-0.98723	0.95521	-1.64777	-1.75704	0.58344	-0.05098	0.47702	0.99897	-0.85208	-0.85936	0.97636	-1.96616	-2.26919	0.28222	1.59679
ENST00000005340	0.70244	0.64825	0.86555	-0.1485	-1.1721	0.90434	-0.02782	-0.19443	1	-0.14563	-1.14719	0.91299	-0.07327	-0.41902	0.99958	-0.10534	-0.63847	0.99549	-0.20903	-1.68726	0.62492	0.12068	0.89556	0.97315	0.00287	0.00915	1	0.07522	0.70863	0.99205	0.04316	0.49601	0.9989	-0.06053	-0.53751	0.99827	-0.11782	-0.8762	0.97595	-0.04546	-0.20359	0.99999	-0.07752	-0.4071	0.99965	-0.18121	-1.38209	0.81131	0.07236
ENST00000005386	0.93012	0.47672	0.77501	-0.05082	-0.80234	0.98472	-0.02226	-0.56528	0.99771	-0.15848	-2.1806	0.30751	-0.0687	-1.31897	0.843	-0.10122	-1.30269	0.85072	-0.0474	-0.88044	0.97541	0.02855	0.18403	1	-0.10766	-1.37072	0.8173	-0.01788	-0.53725	0.99828	-0.0504	-0.51845	0.99859	0.00341	-0.09892	1	-0.13621	-1.46718	0.76426	-0.04644	-0.68386	0.99346	-0.07895	-0.66626	0.99433	-0.02514	-0.27275	0.99997	0.08978
ENST00000005558	1.925	0.083	0.3476	-1.09467	-3.32121	0.10058	-1.17624	-1.46089	0.75924	-0.61182	-1.6337	0.67129	0.23553	0.39055	0.99944	0.32143	0.09805	1	-0.62614	-1.7549	0.60506	-0.08157	1.56861	0.70299	0.48286	1.63136	0.67011	1.33021	3.66892	0.0678	1.4161	3.29547	0.11003	0.46854	1.34478	0.81791	0.56442	-0.04455	1	1.41177	1.79285	0.58535	1.49767	1.49369	0.7425	0.5501	-0.23955	0.99998	0.84735
ENST00000006015	81.0601	0	0	4.35972	14.0806	0	-0.36407	-1.98308	0.42782	3.15931	10.8465	0	3.30612	11.2518	0	-0.23921	-1.32836	0.83815	-0.07462	-0.57469	0.99746	-4.72379	-15.189	0	-1.20041	-3.61712	0.023	-1.0536	-2.93252	0.09796	-4.59893	-14.8334	0	-4.43434	-14.2233	0	3.52338	12.08	0	3.67019	12.4531	0	0.12486	0.66601	0.9943	0.28945	1.35416	0.82541	0.14681
ENST00000006053	1.24577	0.28947	0.63472	0.09133	0.219	0.99999	-0.50073	-0.62514	0.99597	0.62648	1.33102	0.83664	1.27825	1.40786	0.79679	-0.31867	-0.35554	0.99984	0.68329	0.9923	0.95526	-0.59205	-0.82592	0.98214	0.53515	1.10425	0.92621	1.18692	1.20032	0.89293	-0.41	-0.56212	0.99776	0.59196	0.77838	0.9868	1.12721	1.87409	0.4996	1.77898	1.91134	0.47604	0.18206	0.26468	0.99997	1.18402	1.5348	0.72355	0.65177
ENST00000006275	0.88115	0.51099	0.79547	0.19962	1.03144	0.94419	-0.11025	-0.39642	0.99967	-0.08146	-0.05134	1	-0.23579	-0.67344	0.99355	-0.42008	-1.16491	0.90455	-0.07263	-0.00509	1	-0.30987	-1.3569	0.82153	-0.28109	-1.06472	0.93543	-0.43541	-1.66993	0.63858	-0.6197	-2.15083	0.33812	-0.27225	-0.997	0.95248	0.02878	0.34216	0.99986	-0.12554	-0.24282	0.99998	-0.30983	-0.70354	0.99193	0.03762	0.37786	0.99975	-0.15433
ENST00000006658	2.15405	0.05428	0.27812	0.34683	1.30648	0.84846	0.00421	0.85848	0.9782	-0.10576	-0.02337	1	1.31013	3.17292	0.03022	0.45691	1.07695	0.93434	0.14672	0.50227	0.99881	-0.34262	-0.37277	0.99979	-0.45259	-1.2969	0.85288	0.9633	1.97361	0.4367	0.11007	-0.16237	1	-0.20011	-0.75153	0.98905	-0.10997	-0.86243	0.97767	1.30592	2.23972	0.2816	0.4527	0.20182	0.99999	0.14251	-0.35299	0.99984	1.41589
ENST00000006750	0.67549	0.66967	0.8766	-0.13996	-1.37168	0.80412	0.32651	0.16323	1	0.28922	-0.01553	1	-0.36152	-1.59221	0.69059	0.03243	-1.09452	0.91578	-0.21093	-1.16648	0.89251	0.46646	1.45482	0.76223	0.42917	1.35168	0.81203	-0.22156	-0.24253	0.99997	0.17238	0.20547	0.99999	-0.07098	0.13658	1	-0.03729	-0.17697	0.99999	-0.68803	-1.65989	0.65547	-0.29408	-1.18467	0.88269	-0.53744	-1.26499	0.85133	-0.65074
ENST00000006777	0.4524	0.84186	0.94779	-0.26022	-1.40953	0.7961	-0.13615	-0.62628	0.99588	-0.2144	-1.04871	0.9417	-0.10361	-0.40787	0.99963	-0.1915	-0.80767	0.98396	-0.10039	-0.28217	0.99996	0.12408	0.68579	0.99324	0.04582	0.33736	0.99988	0.15661	0.94339	0.96479	0.06872	0.55649	0.99787	0.15983	1.08335	0.93234	-0.07825	-0.36066	0.99982	0.03254	0.22197	0.99999	-0.05536	-0.14623	1	0.03576	0.34531	0.99986	0.11079
ENST00000007264	1.11429	0.35896	0.69192	-0.98317	-1.85003	0.52249	0.10973	0.10714	1	0.21993	0.13328	1	-0.36675	-0.9439	0.96271	-0.02692	0.16502	1	-0.46065	-0.56494	0.99749	1.09289	1.80858	0.54978	1.2031	1.92103	0.47863	0.61642	0.84167	0.9791	0.95625	1.94153	0.46409	0.52251	1.23313	0.87813	0.11021	0.01964	1	-0.47648	-0.9791	0.95548	-0.13665	0.04986	1	-0.57038	-0.6294	0.99542	-0.58669
ENST00000007390	0.22117	0.9692	0.99241	0.0068	0.03055	1	0.00872	0.01452	1	0.04679	0.74701	0.98956	0.00518	0.07851	1	0.03085	0.34106	0.99988	0.05656	0.75323	0.98909	0.00192	-0.01397	1	0.03999	0.70764	0.99218	-0.00162	0.04833	1	0.02404	0.30786	0.99993	0.04975	0.71616	0.99166	0.03806	0.67951	0.99372	-0.00354	0.05912	1	0.02212	0.30358	0.99994	0.04783	0.68826	0.99327	-0.0416
ENST00000007414	1.23572	0.29389	0.63879	-0.27736	-1.00255	0.95225	0.09384	-0.38226	0.99974	-0.47767	-1.31513	0.84338	-1.03098	-2.16102	0.32488	-0.36225	-1.2157	0.88669	-0.01764	0.07681	1	0.3712	0.52088	0.99848	-0.20031	-0.31119	0.99992	-0.75362	-1.11725	0.92162	-0.08489	-0.2232	0.99999	0.25972	1.0359	0.94434	-0.5715	-0.80172	0.98421	-1.12482	-1.5386	0.72091	-0.45609	-0.71746	0.99121	-0.11147	0.43935	0.99942	-0.55331
ENST00000007516	7.36638	0	9e-05	0.32501	3.40607	0.01183	-0.0023	-0.26356	0.99997	0.42345	4.56315	0.00011	0.25525	2.51621	0.15362	0.23462	2.38465	0.20519	0.00767	-0.47251	0.99918	-0.32732	-3.42108	0.01124	0.09844	1.20108	0.89398	-0.06976	-0.76885	0.98784	-0.09039	-0.89991	0.97267	-0.31734	-3.73579	0.00358	0.42576	4.49382	0.00015	0.25755	2.59391	0.128	0.23693	2.46924	0.1708	0.00998	-0.18553	1	-0.1682
ENST00000007708	0.69023	0.65793	0.87022	1.06927	1.26318	0.85185	0.70542	0.90667	0.96351	0.24203	-0.28246	0.99994	0.47474	0.66463	0.99216	0.12744	-0.84806	0.97483	0.27362	-0.116	1	-0.36386	-0.2479	0.99996	-0.82725	-1.52449	0.7268	-0.59454	-0.56352	0.99624	-0.94184	-2.05511	0.44707	-0.79566	-1.31606	0.82928	-0.46339	-1.14863	0.89767	-0.23068	-0.27278	0.99994	-0.57798	-1.64716	0.65935	-0.4318	-0.97864	0.94861	0.23271
ENST00000007969	0.30525	0.93316	0.98043	-0.19152	-0.31741	0.9999	-0.49403	-0.82653	0.98065	-0.50523	-0.87715	0.97387	-0.48372	-0.74026	0.98896	-0.26569	-0.15885	1	0.14553	0.09813	1	-0.30251	-0.52375	0.99833	-0.31371	-0.55986	0.99757	-0.2922	-0.42541	0.99948	-0.07417	0.14879	1	0.33705	0.40037	0.99963	-0.0112	-0.0103	1	0.01031	0.11385	1	0.22833	0.65056	0.99453	0.63956	0.88489	0.97275	0.02151
ENST00000008180	5.57326	5e-05	0.00172	-1.12506	-4.11536	0.00127	-0.08555	0.40469	0.99965	-0.6833	-2.98732	0.05129	-0.86046	-2.68548	0.11079	-0.49434	-2.15816	0.32618	-0.27077	-0.54135	0.99814	1.0395	4.29866	0.00062	0.44175	1.03412	0.94545	0.26459	1.33649	0.83385	0.63072	1.74203	0.58889	0.85429	3.45047	0.01243	-0.59775	-3.2287	0.02571	-0.77491	-2.95021	0.05654	-0.40878	-2.44474	0.18902	-0.18521	-0.91296	0.96986	-0.17716
ENST00000008527	1.41358	0.21651	0.55922	-0.18906	-1.89653	0.48433	0.04256	0.29619	0.99994	-0.13498	-1.11477	0.92324	-0.15641	-1.60498	0.67927	-0.03218	0.03605	1	-0.02049	-0.45985	0.99928	0.23162	2.04558	0.38859	0.05408	0.74777	0.98937	0.03265	0.21933	0.99999	0.15688	1.85533	0.51182	0.16857	1.3663	0.81928	-0.17753	-1.31876	0.84272	-0.19897	-1.77232	0.56805	-0.07474	-0.25262	0.99998	-0.06304	-0.71452	0.99165	-0.02143
ENST00000009041	0.55797	0.76295	0.91695	-0.13668	-0.33998	0.99987	-0.46911	-1.14405	0.91264	-0.27355	-0.63047	0.99562	-0.63364	-1.52548	0.72889	-0.21826	-0.58805	0.99703	-0.44722	-1.13648	0.91528	-0.33243	-0.81371	0.98302	-0.13687	-0.29118	0.99995	-0.49695	-1.17935	0.90016	-0.08158	-0.25436	0.99998	-0.31054	-0.79294	0.98519	0.19556	0.52905	0.99836	-0.16452	-0.31835	0.99991	0.25085	0.55201	0.99792	0.02189	0.05114	1	-0.36008
ENST00000009180	0.58322	0.74314	0.90874	0.21369	0.27822	0.99996	-0.26099	-0.55525	0.99784	0.20649	0.58214	0.99716	0.09405	0.21958	0.99999	0.60491	1.3013	0.84914	0.05919	0.08127	1	-0.47468	-0.80796	0.98354	-0.0072	0.30087	0.99994	-0.11963	-0.05306	1	0.39122	1.02001	0.9476	-0.1545	-0.18825	1	0.46748	1.09092	0.92912	0.35505	0.74457	0.98925	0.8659	1.7558	0.58136	0.32018	0.61307	0.99625	-0.11244
ENST00000009530	3.74762	0.00202	0.03122	0.89222	4.31025	0.00041	0.36851	1.78484	0.55894	0.55878	2.629	0.11966	0.47568	2.66629	0.10941	0.54752	2.68509	0.10413	0.60252	3.2348	0.02192	-0.5237	-2.27936	0.2569	-0.33344	-1.63201	0.66166	-0.41654	-1.54719	0.71592	-0.3447	-1.51128	0.73798	-0.2897	-1.00853	0.95188	0.19027	0.70608	0.99221	0.10717	0.76514	0.98804	0.17901	0.79079	0.9858	0.23401	1.29093	0.85598	-0.0831
ENST00000009589	1.88428	0.09047	0.3631	0.02753	0.13247	1	-0.16948	-0.97008	0.9604	0.06069	0.12322	1	-0.02624	-0.14213	1	0.37921	1.59483	0.68574	0.66754	1.9565	0.44288	-0.19701	-1.08272	0.93333	0.03316	-0.00741	1	-0.05377	-0.26721	0.99997	0.35168	1.45146	0.7735	0.64001	1.81731	0.53628	0.23016	1.06109	0.93928	0.14324	0.80109	0.98493	0.54869	2.41349	0.19293	0.83702	2.74362	0.08793	-0.08692
ENST00000011473	2.19063	0.04839	0.26045	0.00275	0.13848	1	0.93938	0.52508	0.99847	-2.72342	-1.68718	0.62496	-0.30827	-0.14376	1	1.3866	1.46755	0.76364	-1.63764	-1.00036	0.95385	0.93663	0.41186	0.99962	-2.72617	-1.87789	0.49586	-0.31102	-0.28454	0.99996	1.38385	1.363	0.82067	-1.64039	-1.16933	0.90541	-3.6628	-1.94323	0.45368	-1.24765	-0.64878	0.99503	0.44722	0.84473	0.97975	-2.57702	-1.38693	0.80851	2.41514
ENST00000011619	2.18432	0.05021	0.26571	-0.24961	-2.86974	0.06295	-0.12588	-1.32023	0.84262	-0.23607	-2.60184	0.12589	-0.20183	-2.36176	0.21567	-0.22434	-2.55489	0.14071	-0.22595	-2.82233	0.07162	0.12374	1.3535	0.82627	0.01354	0.22577	0.99999	0.04778	0.41034	0.99963	0.02527	0.22024	0.99999	0.02367	-0.04045	1	-0.1102	-1.12314	0.92114	-0.07596	-0.92824	0.96807	-0.09846	-1.10669	0.92624	-0.10007	-1.35591	0.82506	0.03424
ENST00000011653	3.77115	0.00196	0.03067	0.65175	3.43171	0.01364	0.60279	3.25417	0.02357	0.50672	2.61014	0.1304	0.55683	3.4498	0.01301	0.68828	3.21794	0.02605	0.65478	3.67457	0.00596	-0.04896	0.04845	1	-0.14503	-0.76616	0.98766	-0.09492	0.09709	1	0.03653	-0.07885	1	0.00303	0.31872	0.99991	-0.09607	-0.76938	0.9874	-0.04596	0.04402	1	0.08549	-0.12133	1	0.05199	0.25274	0.99998	0.05011
ENST00000011691	1.02417	0.41379	0.73338	-0.27009	-1.10623	0.92472	-0.41077	-1.62364	0.6675	-0.16121	-0.606	0.99648	-0.3453	-1.32303	0.8394	-0.34209	-1.41388	0.79319	-0.49468	-2.20686	0.30049	-0.14069	-0.57498	0.99739	0.10888	0.48079	0.99904	-0.07522	-0.24622	0.99998	-0.072	-0.33595	0.99988	-0.22459	-1.11838	0.92126	0.24957	1.02177	0.94787	0.06547	0.32669	0.9999	0.06869	0.24205	0.99998	-0.0839	-0.49353	0.9989	-0.1841
ENST00000011898	0.955	0.45983	0.76401	1.04741	1.74167	0.58821	0.61931	0.81958	0.98295	-0.22041	0.00355	1	0.98425	1.46566	0.76511	0.65876	1.25031	0.87398	0.50241	0.76362	0.98823	-0.4281	-0.80071	0.98485	-1.26782	-1.71572	0.60576	-0.06316	-0.20642	0.99999	-0.38865	-0.45981	0.99929	-0.545	-0.93891	0.96607	-0.83972	-0.80651	0.98432	0.36494	0.58025	0.99734	0.03945	0.35617	0.99984	-0.1169	-0.0949	1	1.20466
ENST00000012049	1.75906	0.11511	0.41193	0.10331	0.55559	0.99773	0.62596	2.28145	0.27639	0.3337	1.57868	0.69612	0.35373	1.84749	0.52459	0.1536	0.78219	0.98569	0.53018	2.55147	0.16488	0.52266	1.7619	0.58011	0.23039	1.02549	0.9453	0.25043	1.29919	0.84845	0.05029	0.24792	0.99998	0.42687	2.00977	0.42291	-0.29226	-0.78858	0.9848	-0.27223	-0.51934	0.9984	-0.47237	-1.471	0.7599	-0.09579	0.16337	1	0.02003
ENST00000012134	2.44632	0.0293	0.19457	1.21778	0.95537	0.95965	-3.3149	-1.42377	0.78786	1.97658	1.69129	0.62797	0.84054	1.37618	0.81053	0.79014	0.66431	0.99394	-1.03495	-0.28717	0.99995	-4.53268	-2.25949	0.29115	0.7588	0.71069	0.99009	-0.37724	0.36965	0.99975	-0.42763	-0.28228	0.99995	-2.25273	-1.22171	0.88081	5.29148	2.9676	0.08066	4.15544	2.736	0.11264	4.10505	1.98377	0.43455	2.27995	1.13406	0.9167	-1.13604
ENST00000012443	0.83991	0.54187	0.812	-0.06514	-0.78993	0.98591	-0.06108	-0.60397	0.99669	0.03186	0.08281	1	-0.20956	-1.2788	0.86154	-0.11544	-0.43106	0.99951	-0.28259	-1.72763	0.59765	0.00406	0.13708	1	0.097	0.84863	0.97958	-0.14442	-0.49966	0.99886	-0.0503	0.33716	0.99988	-0.21745	-0.93434	0.96692	0.09294	0.66554	0.99435	-0.14847	-0.60539	0.99664	-0.05436	0.18366	1	-0.22151	-1.01499	0.95057	-0.24142
ENST00000013070	2.77605	0.01512	0.12869	-0.0128	-0.34175	0.99987	-0.1447	-1.88104	0.4937	0.0501	0.7789	0.98691	0.00473	0.03832	1	-0.10715	-1.2914	0.85591	-0.17669	-2.59315	0.12958	-0.1319	-1.54078	0.71997	0.0629	1.10181	0.9275	0.01753	0.3647	0.99981	-0.09435	-0.94681	0.96468	-0.16389	-2.23184	0.27982	0.1948	2.56537	0.1386	0.14943	1.84208	0.52005	0.03755	0.60717	0.99659	-0.03199	-0.59929	0.99683	-0.04537
ENST00000013125	0.71762	0.63624	0.85949	-0.08213	-0.40128	0.99966	0.28838	1.25779	0.86841	-0.11852	-0.53409	0.99824	0.0858	0.12204	1	0.13734	0.72131	0.99087	0.07199	0.03869	1	0.37051	1.62917	0.66419	-0.03639	-0.13985	1	0.16793	0.50681	0.99868	0.21947	1.10273	0.92541	0.15413	0.42477	0.99952	-0.4069	-1.72998	0.59868	-0.20258	-1.10299	0.92492	-0.15104	-0.53734	0.99817	-0.21639	-1.18296	0.89831	0.20432
ENST00000013222	1.86107	0.09455	0.3719	0.19553	1.14297	0.91451	0.09622	0.6866	0.99332	0.44009	2.52334	0.1528	0.05544	0.63132	0.99577	0.21106	1.22461	0.88455	-0.12206	-0.57271	0.99754	-0.09932	-0.38535	0.99974	0.24455	1.38148	0.81165	-0.1401	-0.47689	0.99912	0.01553	0.11362	1	-0.3176	-1.67298	0.63441	0.34387	1.68983	0.62318	-0.04078	-0.07448	1	0.11484	0.48319	0.99906	-0.21828	-1.20012	0.89414	-0.38465
ENST00000013807	1.34798	0.24285	0.58784	-0.02315	0.15829	1	0.10936	0.84904	0.97913	0.17839	0.68127	0.99343	0.22394	1.23553	0.87885	-0.25351	-1.311	0.84603	0.21249	0.7597	0.98828	0.13252	0.69593	0.99263	0.20154	0.52089	0.99851	0.24709	1.07275	0.93482	-0.23036	-1.44929	0.77399	0.23565	0.60333	0.99662	0.06902	-0.19338	1	0.11458	0.33077	0.99989	-0.36287	-2.02542	0.40319	0.10313	-0.10806	1	0.04555
ENST00000014914	2.83416	0.01342	0.11886	0.01964	0.22593	0.99999	0.69791	1.90662	0.49401	0.25855	0.97834	0.95492	0.71229	1.6236	0.66945	1.35069	3.25117	0.05168	1.0287	2.9178	0.0922	0.67827	1.69596	0.62467	0.23891	0.75408	0.98754	0.69265	1.40544	0.79333	1.33105	3.03636	0.08003	1.00906	2.7003	0.14186	-0.43936	-0.97482	0.95479	0.01438	-0.32329	0.99988	0.65278	1.24667	0.86663	0.33079	0.90304	0.96795	0.45374
ENST00000014930	0.92944	0.47715	0.77535	0.11524	1.28081	0.86058	0.04135	0.52155	0.99854	0.16394	1.35501	0.82523	-0.02557	-0.25111	0.99998	0.0806	0.7703	0.98764	0.15186	1.54416	0.71785	-0.07389	-0.67176	0.99405	0.0487	0.09507	1	-0.14081	-1.47359	0.76045	-0.03465	-0.46399	0.99925	0.03662	0.29922	0.99994	0.12259	0.74979	0.98927	-0.06692	-0.735	0.99035	0.03924	0.21512	0.99999	0.11051	0.93703	0.96639	-0.18951
ENST00000014935	2.83391	0.01346	0.11902	0.17164	0.88446	0.97476	0.62674	2.6378	0.11809	-0.08909	-0.76713	0.98789	0.41287	2.05446	0.38251	0.01292	0.1028	1	0.00898	-0.09758	1	0.45511	1.80988	0.54237	-0.26072	-1.61353	0.67369	0.24123	1.19046	0.89744	-0.15871	-0.74824	0.98938	-0.16265	-0.94691	0.96458	-0.71583	-3.26895	0.02019	-0.21388	-0.64922	0.99503	-0.61382	-2.46089	0.17703	-0.61776	-2.64449	0.11609	0.50196
ENST00000016171	1.29647	0.26533	0.61034	0.01159	0.14057	1	-0.02108	0.01445	1	0.07245	0.57886	0.99738	0.0002	-0.24845	0.99998	-0.1647	-1.15151	0.91163	-0.19622	-1.77097	0.56824	-0.03266	-0.11645	1	0.06086	0.43637	0.99947	-0.01138	-0.38075	0.99976	-0.17629	-1.27649	0.86259	-0.2078	-1.89385	0.48514	0.09353	0.52525	0.99848	0.02128	-0.24589	0.99998	-0.14362	-1.08652	0.93202	-0.17514	-1.66446	0.64011	-0.07224
ENST00000017003	1.71158	0.1239	0.42805	0.30777	1.58071	0.69482	-0.03316	0.11933	1	-0.08948	-0.71631	0.99156	0.003	0.08025	1	-0.20119	-1.07062	0.93633	-0.25424	-1.21874	0.88669	-0.34094	-1.36448	0.82018	-0.39725	-2.24081	0.27725	-0.30478	-1.43758	0.78088	-0.50897	-2.5709	0.13866	-0.56202	-2.72911	0.09445	-0.05632	-0.78515	0.98628	0.03616	-0.03947	1	-0.16803	-1.11532	0.92323	-0.22108	-1.25332	0.87246	0.09248
ENST00000019019	0.65793	0.68368	0.88255	-0.17187	-0.14789	1	0.28307	1.27739	0.85285	0.60454	1.34592	0.81976	0.27921	1.07006	0.9273	-0.02067	0.12978	1	-0.13929	0.33293	0.99986	0.45494	1.4188	0.78505	0.7764	1.49383	0.74413	0.45108	1.21696	0.87689	0.15119	0.27197	0.99996	0.03258	0.47736	0.99891	0.32147	0.01413	1	-0.00385	-0.24291	0.99998	-0.30374	-1.10902	0.91713	-0.42236	-0.93466	0.9616	-0.32532
ENST00000019317	1.24116	0.29084	0.63626	2.02929	0.7962	0.98033	0.56188	0.17782	1	-0.15048	-0.54276	0.99784	-0.43996	-1.04788	0.93749	0.59267	-0.14881	1	-0.76192	-1.93368	0.47371	-1.4674	-0.55009	0.99708	-2.17977	-1.30087	0.83814	-2.46925	-1.78403	0.5825	-1.43661	-0.88676	0.96707	-2.79121	-2.6332	0.19968	-0.71236	-0.66298	0.99332	-1.00185	-1.11686	0.91568	0.03079	-0.30179	0.99992	-1.32381	-1.91258	0.49191	-0.28948
ENST00000020945	0.86143	0.52583	0.80404	0.4857	0.95064	0.96243	0.08245	0.46952	0.99915	0.9408	1.63375	0.6616	-0.09407	0.0395	1	1.08549	1.53558	0.72244	0.6491	1.06179	0.93686	-0.40326	-0.43246	0.99946	0.4551	0.7097	0.99135	-0.57977	-0.89805	0.97156	0.59978	0.63696	0.99519	0.1634	0.14643	1	0.85835	1.09919	0.92561	-0.17651	-0.4259	0.99951	1.00304	1.0202	0.9472	0.56666	0.55865	0.99771	-1.03487
ENST00000022615	5.13771	0.00011	0.00343	0.18768	2.05761	0.37838	-0.05231	-0.74294	0.98987	0.31028	3.58868	0.00617	0.12104	1.22791	0.88347	0.07361	0.55745	0.9979	-0.05964	-1.20504	0.89249	-0.23999	-2.65118	0.11116	0.1226	1.54402	0.71802	-0.06663	-0.75944	0.98861	-0.11407	-1.41915	0.79166	-0.24732	-3.17058	0.02563	0.36259	4.07417	0.00092	0.17335	1.86181	0.50602	0.12591	1.23404	0.88098	-0.00733	-0.40689	0.99965	-0.18923
ENST00000025008	0.46118	0.83581	0.94531	-1.75055	-1.41739	0.79085	-1.27059	-0.80697	0.98357	-0.84421	-0.34848	0.99985	-1.69838	-1.0687	0.93529	-1.19066	-0.82475	0.98162	-0.56843	-0.42401	0.99952	0.47995	0.55904	0.99779	0.90634	1.09992	0.9269	0.05217	0.36795	0.9998	0.55989	0.56416	0.99767	1.18212	0.93635	0.96568	0.42638	0.48397	0.99901	-0.42778	-0.21562	0.99999	0.07993	-0.00543	1	0.70216	0.36771	0.99979	-0.85417
ENST00000025301	2.85809	0.01271	0.1148	-0.36538	-2.92584	0.05547	-0.00505	0.21819	0.99999	-0.21686	-1.76212	0.57452	-0.09739	-0.73517	0.99031	-0.06842	-0.22285	0.99999	-0.00595	0.35593	0.99984	0.36033	2.92761	0.05528	0.14852	1.1136	0.92383	0.268	2.06713	0.37452	0.29696	2.58585	0.13283	0.35943	3.17533	0.02661	-0.21181	-1.85088	0.51444	-0.09234	-0.89625	0.97299	-0.06337	-0.41867	0.99958	-0.0009	0.12085	1	0.11947
ENST00000026218	2.48178	0.02789	0.18934	-0.40974	-0.39192	0.99966	1.37116	1.35606	0.81604	-0.49845	-0.32928	0.99988	0.10584	-0.0645	1	-2.33502	-1.81349	0.54685	1.31361	1.71987	0.61342	1.78089	1.71918	0.61368	-0.08871	0.05836	1	0.51558	0.31406	0.99991	-1.92528	-1.43298	0.78153	1.72334	2.10019	0.39403	-1.8696	-1.64814	0.6559	-1.26531	-1.38182	0.80314	-3.70618	-3.0006	0.08595	-0.05755	0.2995	0.99991	0.60429
ENST00000028008	0.91506	0.48663	0.78065	-0.23514	-0.4973	0.99824	-0.44559	-1.0833	0.91949	0.44191	0.97804	0.94425	0.7631	1.83111	0.57296	-0.0153	-0.34023	0.99979	0.08465	0.1113	1	-0.21044	-0.61873	0.99457	0.67705	1.48436	0.74716	0.99825	2.36938	0.33685	0.21984	0.13052	1	0.31979	0.58228	0.99587	0.8875	2.005	0.47528	1.20869	2.8361	0.19172	0.43029	0.71014	0.98892	0.53024	1.14114	0.9005	0.32119
ENST00000029410	0.98706	0.43806	0.74923	0.33104	0.7208	0.99111	0.09164	0.3808	0.99975	0.72671	1.74741	0.58597	0.30665	0.47602	0.9991	0.20526	0.83179	0.98125	-0.09408	-0.59679	0.99684	-0.2394	-0.29469	0.99994	0.39567	1.02462	0.94715	-0.02439	-0.21159	0.99999	-0.12578	0.12306	1	-0.42512	-1.27378	0.8628	0.63508	1.26517	0.86618	0.21501	0.08311	1	0.11362	0.40645	0.99964	-0.18572	-0.91878	0.96908	-0.42006
ENST00000031146	2.06529	0.06318	0.30213	-1.88785	-3.63077	0.0676	-1.00003	-1.4732	0.75218	-1.26119	-2.21368	0.39467	-2.01723	-4.11656	0.03708	-1.53053	-2.87563	0.17422	-1.06162	-2.42449	0.31133	0.88782	1.86704	0.54258	0.62666	1.31385	0.83161	-0.12938	-0.52636	0.99788	0.35732	0.53224	0.99772	0.82623	0.97198	0.95	-0.26115	-0.6048	0.99457	-1.01719	-2.3295	0.32597	-0.53049	-1.27249	0.84826	-0.06159	-0.86266	0.96896	-0.75604
ENST00000033079	1.39484	0.22211	0.56543	-0.09415	-0.91734	0.96961	0.18357	1.10976	0.92476	-0.16384	-1.33845	0.83327	0.08025	0.10875	1	0.09328	0.77145	0.98747	-0.01008	-0.02275	1	0.27772	1.94169	0.45472	-0.06969	-0.42531	0.99954	0.1744	0.97868	0.9582	0.18743	1.6405	0.65612	0.08407	0.86376	0.97755	-0.34741	-2.32041	0.2381	-0.10331	-0.9619	0.96153	-0.09029	-0.35493	0.99984	-0.19364	-1.09936	0.92793	0.2441
ENST00000034275	2.61835	0.0209	0.15849	-0.29317	-2.51014	0.1574	-0.16614	-0.99706	0.95459	-0.08218	-0.38303	0.99975	-0.2983	-2.40314	0.19907	0.00362	0.35402	0.99984	-0.26703	-1.87742	0.49612	0.12703	1.35134	0.82717	0.21099	2.07301	0.37019	-0.00513	0.03254	1	0.29679	2.75984	0.08577	0.02614	0.57528	0.99748	0.08396	0.61895	0.99621	-0.13216	-1.28463	0.85894	0.16976	1.29398	0.8547	-0.10089	-0.78521	0.98636	-0.21612
ENST00000035307	1.03815	0.40498	0.72744	0.00342	0.18639	1	0.02695	0.3521	0.99985	-0.13756	-0.5785	0.99738	0.27926	1.77881	0.56349	-0.11345	-0.24731	0.99998	-0.02611	0.08997	1	0.02353	0.17554	1	-0.14098	-0.75556	0.9888	0.27584	1.58625	0.69128	-0.11687	-0.42534	0.99954	-0.02953	-0.09153	1	-0.16451	-0.88475	0.97469	0.25231	1.33218	0.83631	-0.14039	-0.57271	0.99752	-0.05306	-0.25854	0.99998	0.41682
ENST00000037243	1.63488	0.14491	0.46227	-0.12272	-2.05023	0.38313	-0.12069	-2.11718	0.34263	-0.0734	-0.95943	0.96245	-0.13144	-2.12651	0.33718	-0.02229	-0.14896	1	-0.07776	-1.24113	0.87802	0.00203	-0.19933	0.99999	0.04932	1.05072	0.94198	-0.00872	-0.13929	1	0.10043	1.81535	0.53766	0.04496	0.73962	0.9901	0.04729	1.18161	0.90123	-0.01075	0.06287	1	0.0984	1.89852	0.4814	0.04292	0.88869	0.97433	-0.05804
ENST00000037502	8.0426	0	3e-05	-0.31136	-1.48424	0.75438	0.15812	0.94854	0.96448	-0.31513	-1.21465	0.88869	0.37716	1.98554	0.42425	0.68468	3.4182	0.01149	0.72164	3.45745	0.01003	0.46948	2.31017	0.23944	-0.00377	0.25749	0.99998	0.68852	3.37868	0.01314	0.99604	4.78034	4e-05	1.033	4.83316	3e-05	-0.47325	-2.05485	0.38036	0.21904	0.94317	0.96544	0.52656	2.30386	0.24263	0.56352	2.34199	0.22468	0.69228
ENST00000037869	2.37796	0.03415	0.21322	0.09858	0.58376	0.99726	-0.14882	-1.14632	0.91339	0.24474	1.76958	0.56928	0.16774	0.91214	0.9706	-0.07976	-0.89051	0.97396	-0.11948	-1.13939	0.91572	-0.2474	-1.67359	0.63403	0.14616	1.17687	0.90265	0.06916	0.34436	0.99987	-0.17834	-1.43562	0.78229	-0.21807	-1.68477	0.62655	0.39355	2.76341	0.08514	0.31656	1.94623	0.45059	0.06905	0.27143	0.99997	0.02933	0.0444	1	-0.077
ENST00000038176	0.62077	0.71327	0.89536	0.30511	0.3875	0.99973	-0.26974	-1.12919	0.91889	-0.22074	-1.11728	0.92266	-0.1155	-0.30296	0.99994	-0.06516	-0.16218	1	-0.1129	-0.64899	0.99507	-0.57485	-1.45767	0.76962	-0.52584	-1.45664	0.77019	-0.4206	-0.66569	0.99431	-0.37027	-0.53029	0.99839	-0.418	-1.0014	0.95349	0.04901	0.06096	1	0.15425	0.80187	0.98471	0.20458	0.93608	0.96654	0.15685	0.47922	0.9991	0.10524
ENST00000039989	0.19213	0.97843	0.99444	0.02952	0.06831	1	0.08899	0.30413	0.99993	0.03911	0.13953	1	0.11464	0.25176	0.99998	-0.00398	0.00882	1	-0.02244	-0.65928	0.99458	0.05948	0.23805	0.99998	0.00959	0.07146	1	0.08512	0.18421	1	-0.03349	-0.05676	1	-0.05196	-0.71805	0.99141	-0.04989	-0.1675	1	0.02564	-0.05649	1	-0.09297	-0.28487	0.99996	-0.11144	-0.90412	0.97164	0.07553
ENST00000040584	4.5485	0.00039	0.00902	-0.14993	-2.08042	0.36543	0.10786	0.65093	0.995	-0.12874	-1.48547	0.75356	-0.24579	-2.86903	0.06392	0.10489	0.82421	0.98245	0.09268	0.97895	0.95846	0.25779	2.5497	0.1436	0.02119	0.56223	0.99778	-0.09587	-0.83891	0.98078	0.25481	2.78901	0.07926	0.24261	2.96144	0.04932	-0.2366	-1.99661	0.41775	-0.35365	-3.2631	0.0198	-0.00297	0.13676	1	-0.01518	0.27729	0.99996	-0.11705
ENST00000040663	1.52625	0.17719	0.50968	0.5858	2.07665	0.36889	0.20941	1.26937	0.86559	-0.02465	-0.07892	1	-0.01113	-0.25078	0.99998	0.04793	0.15919	1	-0.07538	-0.33507	0.99989	-0.3764	-0.70399	0.99231	-0.61045	-2.10231	0.35361	-0.59693	-2.23364	0.28046	-0.53787	-1.84439	0.51889	-0.66118	-2.33476	0.23023	-0.23405	-1.3142	0.84515	-0.22053	-1.45314	0.77224	-0.16148	-1.0754	0.93506	-0.28479	-1.54143	0.71954	0.01352
ENST00000040738	0.89189	0.50381	0.79135	-0.02554	-0.62361	0.99607	-0.05077	-0.9259	0.96848	0.07329	0.77709	0.98713	0.00257	-0.24187	0.99998	-0.05361	-0.91425	0.9704	-0.10049	-1.21645	0.88799	-0.02523	-0.33928	0.99988	0.09883	1.37353	0.81603	0.02811	0.35761	0.99984	-0.02807	-0.30799	0.99993	-0.07494	-0.60492	0.99668	0.12406	1.62534	0.66588	0.05334	0.66596	0.99437	-0.00284	0.03934	1	-0.04971	-0.23689	0.99999	-0.07072
ENST00000040877	1.49074	0.1886	0.52498	-0.11332	-0.68429	0.99341	0.3377	1.68961	0.62355	0.11899	0.52841	0.99842	-0.12436	-1.10085	0.92761	0.119	0.47269	0.99916	0.12866	0.21245	0.99999	0.45102	2.3034	0.24567	0.2323	1.18483	0.89957	-0.01104	-0.44073	0.99944	0.23231	1.11892	0.92209	0.24198	0.86404	0.97755	-0.21872	-1.16387	0.90702	-0.46206	-2.63178	0.12033	-0.21871	-1.18696	0.89873	-0.20905	-1.43215	0.78402	-0.24334
ENST00000042381	0.613	0.71948	0.89848	-0.02308	-0.01974	1	1.19271	1.28905	0.85659	0.15474	0.08618	1	-0.00723	-0.26017	0.99997	0.20048	0.18877	1	0.42022	1.02854	0.94729	1.2158	1.29872	0.85216	0.17782	0.1045	1	0.01585	-0.23945	0.99998	0.22356	0.20607	0.99999	0.44331	1.04024	0.94439	-1.03797	-1.18341	0.89996	-1.19995	-1.46544	0.76503	-0.99224	-1.08152	0.93314	-0.77249	-0.37832	0.99977	-0.16197
ENST00000043402	0.75819	0.60416	0.84411	0.26744	0.87918	0.96693	0.29102	0.84561	0.97238	0.24676	1.14319	0.89851	0.66842	1.74068	0.61516	0.03934	0.31114	0.99988	-0.66673	-0.6467	0.99359	0.02359	0.02997	1	-0.02068	0.2839	0.99992	0.40098	0.82983	0.97219	-0.2281	-0.51768	0.99778	-0.93416	-1.51779	0.73057	-0.04427	0.23349	0.99998	0.3774	0.72847	0.98518	-0.25169	-0.50953	0.99797	-0.95775	-1.44795	0.76706	0.42166
ENST00000044462	1.2632	0.28084	0.62552	-0.27767	-1.35121	0.82723	-0.11448	-0.47652	0.99913	0.02682	0.05052	1	-0.39396	-1.97793	0.42984	-0.10335	-0.85218	0.97916	0.06792	0.16988	1	0.16319	0.78069	0.98676	0.30449	1.36149	0.82202	-0.11629	-0.66154	0.99454	0.17433	0.44201	0.99943	0.34559	1.46256	0.76694	0.1413	0.5115	0.99869	-0.27948	-1.37817	0.81343	0.01114	-0.33788	0.99988	0.1824	0.61742	0.99626	-0.42078
ENST00000046640	1.72295	0.12297	0.42648	0.0854	1.16977	0.90497	-0.08791	-0.20366	0.99999	0.08173	1.37181	0.81646	0.14392	1.91081	0.47493	-0.13595	-0.68785	0.99322	0.02878	0.10539	1	-0.17331	-1.29522	0.85384	-0.00367	0.21454	0.99999	0.05852	0.77537	0.98711	-0.22135	-1.8109	0.54163	-0.05662	-1.0186	0.94951	0.16964	1.47948	0.7569	0.23183	1.988	0.42465	-0.04804	-0.44463	0.99941	0.11669	0.29512	0.99995	0.06219
ENST00000046794	1.1959	0.31432	0.65653	-0.13289	-0.48936	0.99886	-0.25858	-0.87165	0.97485	-0.16883	-0.60012	0.99645	0.33045	0.68715	0.99246	-0.54858	-1.94272	0.464	-0.21172	-0.78663	0.98508	-0.12569	-0.41008	0.99959	-0.03594	-0.11652	1	0.46334	1.15464	0.90578	-0.41569	-1.46368	0.76416	-0.07883	-0.31203	0.99992	0.08975	0.29556	0.99994	0.58903	1.48745	0.75013	-0.29	-0.97956	0.95606	0.04686	0.1039	1	0.49927
ENST00000052569	1.99803	0.07193	0.32366	0.14484	0.6446	0.9943	-1.01062	-1.32504	0.83505	0.85837	0.91	0.96552	0.31317	0.1472	1	1.85092	2.6574	0.20191	0.21509	0.34801	0.99982	-1.15546	-1.9513	0.46558	0.71353	0.29266	0.99993	0.16833	-0.4681	0.99897	1.70608	2.05023	0.44237	0.07026	-0.26441	0.99996	1.86899	2.14772	0.36526	1.32379	1.40528	0.79352	2.86155	3.81615	0.02988	1.22572	1.60325	0.68136	-0.5452
ENST00000052754	1.50484	0.18439	0.5193	-0.09936	-0.28516	0.99996	0.13265	0.41115	0.99963	-0.08115	-0.50782	0.99876	-0.35151	-0.67387	0.994	0.26998	1.16723	0.90643	0.57128	1.73691	0.59108	0.23201	0.67296	0.99404	0.01821	-0.22683	0.99999	-0.25215	-0.39128	0.99972	0.36934	1.43343	0.78371	0.67064	2.00151	0.41372	-0.2138	-0.87148	0.97676	-0.48416	-1.02673	0.94798	0.13733	0.69257	0.99304	0.43863	1.23322	0.88129	-0.27036
ENST00000053468	1.26713	0.27909	0.62372	-0.07587	-1.44301	0.77829	-0.07657	-1.33866	0.8337	-0.17088	-2.64844	0.11217	-0.03543	-0.88078	0.97546	-0.05267	-1.21496	0.88859	-0.06277	-1.59592	0.68504	-0.0007	0.00734	1	-0.09501	-1.2075	0.89149	0.04044	0.50763	0.99876	0.0232	0.17593	1	0.0131	-0.20161	0.99999	-0.09431	-1.13656	0.91684	0.04114	0.46924	0.99921	0.0239	0.15779	1	0.0138	-0.19627	1	0.13546
ENST00000053867	1.59813	0.15469	0.47735	0.29307	2.54836	0.14329	0.2409	1.91247	0.47232	0.2296	2.12866	0.33633	0.27276	2.52009	0.15302	0.16484	1.49053	0.75061	0.1632	1.77124	0.56785	-0.05217	-0.47297	0.99917	-0.06347	-0.3825	0.99976	-0.02031	0.04624	1	-0.12823	-0.97932	0.95845	-0.12987	-0.7165	0.99162	-0.0113	0.10709	1	0.03187	0.50494	0.99879	-0.07606	-0.46166	0.99928	-0.0777	-0.21104	0.99999	0.04316
ENST00000054650	1.26509	0.27995	0.62468	-0.00016	0.12237	1	-0.15202	-0.42135	0.99956	0.19824	0.75834	0.98838	0.10607	0.51302	0.99863	0.61985	1.92455	0.46813	0.34203	1.43809	0.78021	-0.15185	-0.53057	0.99836	0.1984	0.63098	0.99567	0.10623	0.39048	0.99971	0.62002	1.78937	0.55779	0.34219	1.30531	0.84843	0.35026	1.11844	0.92153	0.25809	0.88393	0.97442	0.77187	2.20911	0.29779	0.49405	1.75512	0.58035	-0.09217
ENST00000054666	1.07922	0.37981	0.70915	0.01337	0.43083	0.99951	0.08624	1.89822	0.48164	0.0225	0.54157	0.99821	0.06113	1.53381	0.72435	0.08016	1.7027	0.6143	0.06347	1.27577	0.86315	0.07288	1.48363	0.75474	0.00914	0.11541	1	0.04776	1.10562	0.92657	0.06679	1.2734	0.86419	0.0501	0.85154	0.97933	-0.06374	-1.35434	0.82586	-0.02511	-0.40269	0.99967	-0.00609	-0.24231	0.99998	-0.02278	-0.64641	0.99521	0.03863
ENST00000054950	0.69581	0.65352	0.86796	-0.05753	-0.22483	0.99999	-0.06595	-0.53834	0.99826	-0.09672	-0.72736	0.99091	0.03341	0.88982	0.97409	-0.00123	0.4513	0.99936	-0.06652	-0.68528	0.99341	-0.00842	-0.32574	0.9999	-0.03918	-0.49936	0.99887	0.09094	1.09689	0.92906	0.05631	0.66247	0.99451	-0.00898	-0.46448	0.99925	-0.03076	-0.14705	1	0.09936	1.34839	0.82872	0.06472	0.9386	0.96622	-0.00057	-0.1192	1	0.13012
ENST00000055077	3.65317	0.00248	0.03636	0.37157	1.70182	0.61569	0.06384	0.43012	0.99951	0.71094	3.35723	0.01671	0.34277	1.5845	0.69241	-0.1816	-0.94552	0.96467	0.30063	1.38148	0.81123	-0.30773	-1.16564	0.90607	0.33937	1.67241	0.63547	-0.0288	-0.06144	1	-0.55317	-2.56746	0.14147	-0.07094	-0.27523	0.99996	0.6471	2.73753	0.09568	0.27893	1.07373	0.93501	-0.24544	-1.29438	0.85407	0.23679	0.87913	0.97532	-0.36816
ENST00000055335	1.1834	0.32094	0.66257	-0.15414	-1.21294	0.88921	-0.07442	-0.58812	0.99715	-0.26738	-1.97353	0.43239	-0.25137	-1.90333	0.47865	-0.15863	-1.14586	0.91361	-0.01133	-0.17594	1	0.07973	0.54231	0.99819	-0.11324	-0.765	0.98812	-0.09723	-0.71894	0.99145	-0.00449	0.02899	1	0.14281	0.99253	0.95563	-0.19296	-1.2526	0.87304	-0.17696	-1.20244	0.89327	-0.08421	-0.49957	0.99886	0.06308	0.4043	0.99966	0.016
ENST00000056217	0.311	0.93021	0.97895	-0.37513	-0.43291	0.99941	0.15255	0.61939	0.99551	-0.17461	-0.26324	0.99997	0.06711	0.47157	0.999	-0.11409	0.32042	0.9999	0.28287	0.52647	0.99817	0.52767	1.02689	0.94299	0.20051	0.16033	1	0.44224	0.89591	0.9698	0.26104	0.74181	0.9886	0.65799	0.94175	0.96193	-0.32716	-0.85636	0.97585	-0.08543	-0.16277	1	-0.26663	-0.30196	0.99993	0.13032	-0.09895	1	0.24173
ENST00000056233	2.22524	0.04604	0.25345	1.60892	3.03718	0.0921	1.6706	2.94851	0.11159	0.56017	1.42664	0.78292	1.12049	2.03866	0.42553	0.32689	0.84845	0.97751	0.65255	0.54265	0.99787	0.06168	0.13818	1	-1.04876	-1.5883	0.69143	-0.48843	-0.91342	0.96283	-1.28203	-2.10434	0.39647	-0.95637	-2.33139	0.29241	-1.11044	-1.61434	0.67671	-0.55012	-0.98742	0.94696	-1.34371	-2.09119	0.40547	-1.01805	-2.31155	0.30479	0.56032
ENST00000060969	1.15428	0.33656	0.67431	0.13941	0.93961	0.9639	-0.09766	-0.52339	0.99838	0.07375	0.32109	0.9999	-0.11855	-0.88391	0.97327	-0.00593	-0.18136	1	-0.18566	-1.438	0.77884	-0.23707	-1.39607	0.80109	-0.06565	-0.60041	0.99648	-0.25796	-1.78791	0.56291	-0.14534	-1.07815	0.93144	-0.32507	-2.33009	0.25056	0.17141	0.81244	0.98254	-0.02089	-0.31612	0.99991	0.09173	0.33245	0.99988	-0.088	-0.84021	0.97942	-0.1923
ENST00000061240	1.39757	0.22231	0.56567	-0.00045	0.13567	1	0.28204	0.85345	0.97687	0.06447	0.36579	0.99978	0.90942	2.52537	0.19852	0.44066	1.63284	0.66299	0.20651	0.83181	0.9798	0.28249	0.72443	0.98998	0.06492	0.23071	0.99999	0.90987	2.38717	0.25122	0.44111	1.49631	0.74478	0.20696	0.69824	0.99182	-0.21757	-0.50066	0.99867	0.62738	1.55278	0.71159	0.15862	0.70513	0.99126	-0.07553	-0.04792	1	0.84495
ENST00000064571	2.70811	0.01794	0.1437	-0.13793	-0.45262	0.99924	0.96967	1.75577	0.58975	-0.64895	-1.96534	0.45402	-0.23305	-0.84844	0.9773	0.40095	0.8035	0.98254	0.46951	1.02627	0.94311	1.1076	2.15593	0.3601	-0.51102	-1.50818	0.73811	-0.09512	-0.40506	0.9996	0.53888	1.2266	0.87751	0.60744	1.45046	0.77004	-1.61862	-3.48852	0.02942	-1.20273	-2.47931	0.21848	-0.56873	-0.94547	0.95983	-0.50017	-0.7485	0.98725	0.4159
ENST00000064724	2.60531	0.02154	0.16172	0.03801	0.2739	0.99996	0.17836	0.65485	0.99437	-0.72033	-1.94675	0.4591	0.29519	0.81956	0.98156	0.56729	1.19992	0.89029	0.6043	1.59247	0.68765	0.14035	0.39673	0.99966	-0.75834	-2.19969	0.31306	0.25718	0.54976	0.99782	0.52928	0.93522	0.96443	0.56629	1.3243	0.83659	-0.89869	-2.44255	0.20254	0.11683	0.12928	1	0.38893	0.50257	0.99868	0.42594	0.86881	0.97519	1.01552
ENST00000064778	0.78982	0.57994	0.83181	0.27545	1.10263	0.92742	0.10911	0.64496	0.99527	-0.11513	-0.7603	0.98852	-0.05692	-0.3381	0.99988	0.04683	0.36027	0.99983	0.16377	0.63107	0.9958	-0.16634	-0.39337	0.99971	-0.39058	-1.82107	0.53393	-0.33237	-1.39217	0.80617	-0.22862	-0.70692	0.99221	-0.11168	-0.43963	0.99945	-0.22425	-1.33701	0.83445	-0.16603	-0.93746	0.96645	-0.06229	-0.28634	0.99996	0.05465	-0.03254	1	0.05821
ENST00000064780	3.1249	0.0075	0.08053	-0.10379	-0.62811	0.99586	0.60853	2.48508	0.1697	-0.26644	-1.36779	0.8186	0.06507	0.45577	0.99932	-0.0861	-0.69713	0.99271	0.37464	1.32951	0.83762	0.71232	3.02599	0.04332	-0.16265	-0.73331	0.99044	0.16886	1.04931	0.94186	0.01769	-0.08959	1	0.47844	1.91509	0.47197	-0.87497	-3.65537	0.00579	-0.54346	-1.98852	0.42512	-0.69463	-3.02192	0.04362	-0.23388	-1.18371	0.89968	0.33151
ENST00000066544	0.80366	0.56895	0.82616	-0.41712	-1.03759	0.94515	-0.46909	-0.97234	0.95981	0.15948	0.26967	0.99997	-0.40043	-0.86991	0.97686	-0.03911	0.25933	0.99997	-0.53057	-1.18222	0.90084	-0.05197	0.01208	1	0.5766	1.26792	0.86636	0.01669	0.1388	1	0.37801	1.26055	0.8696	-0.11346	-0.16345	1	0.62858	1.19645	0.8955	0.06867	0.12	1	0.42998	1.18891	0.89836	-0.06148	-0.16677	1	-0.55991
ENST00000072644	1.20768	0.3082	0.65124	-0.36156	-1.73068	0.59664	-0.46587	-2.08647	0.3657	-0.521	-2.45253	0.18402	-0.39552	-1.7881	0.55821	-0.35579	-1.73975	0.59046	-0.34225	-1.59907	0.68312	-0.1043	-0.45549	0.99931	-0.15944	-0.733	0.99035	-0.03395	-0.10474	1	0.00578	-0.05775	1	0.01931	0.08758	1	-0.05514	-0.23765	0.99998	0.07035	0.3448	0.99986	0.11008	0.38856	0.99973	0.12361	0.52735	0.99842	0.12549
ENST00000072869	4.77634	0.00025	0.00627	0.00978	0.21672	0.99999	-0.10862	-0.83867	0.98073	0.01292	0.26245	0.99997	0.16558	1.43804	0.78073	-0.18736	-1.88397	0.49211	-0.2761	-3.3111	0.0173	-0.11839	-1.03235	0.94628	0.00315	0.04826	1	0.1558	1.21748	0.88705	-0.19714	-2.07088	0.3721	-0.28587	-3.49234	0.00947	0.12154	1.06199	0.93867	0.27419	2.14362	0.3297	-0.07874	-0.94172	0.96552	-0.16748	-2.27203	0.26005	0.15266
ENST00000074304	2.20968	0.04657	0.2554	0.7163	0.79919	0.98025	0.66951	0.60011	0.99548	0.5292	0.86231	0.9719	-0.23102	-0.78978	0.9826	-0.21099	-0.24465	0.99998	-1.56329	-2.31839	0.2774	-0.04679	-0.1382	1	-0.1871	0.07646	1	-0.94732	-1.56612	0.70426	-0.92729	-1.01246	0.94156	-2.27959	-3.13678	0.0791	-0.14031	0.2069	0.99999	-0.90053	-1.31399	0.83294	-0.8805	-0.80427	0.98007	-2.2328	-2.74541	0.15672	-0.76022
ENST00000075120	0.70689	0.64475	0.86422	0.57308	1.26555	0.86004	0.15642	0.23589	0.99998	0.09231	0.34775	0.99983	1.20573	1.79227	0.57048	0.12244	0.44579	0.99929	0.05098	0.06953	1	-0.41666	-0.9444	0.96057	-0.48077	-0.8999	0.96861	0.63265	0.56946	0.99682	-0.45064	-0.77579	0.98508	-0.5221	-1.14507	0.90702	-0.0641	0.09096	1	1.04932	1.4514	0.76763	-0.03398	0.18789	1	-0.10544	-0.16242	1	1.11342
ENST00000075322	0.37214	0.89524	0.96722	0.4485	0.85873	0.97046	-0.4313	-0.83187	0.97601	-0.29541	-0.41602	0.99939	0.01031	-0.42375	0.99929	0.02971	-0.04379	1	-0.07532	-0.21547	0.99999	-0.8798	-1.637	0.66529	-0.74391	-1.26282	0.85354	-0.43819	-1.27014	0.84936	-0.41879	-0.85977	0.97087	-0.52382	-1.03285	0.93422	0.13589	0.43107	0.99929	0.44161	0.42175	0.99935	0.46101	0.75265	0.98563	0.35598	0.59556	0.99577	0.30572
ENST00000075430	1.57034	0.16367	0.49033	0.06386	-0.39762	0.99968	-0.17282	-0.36443	0.99981	0.91835	1.16135	0.90665	2.0575	2.18533	0.32196	0.66153	0.17324	1	0.06888	-0.4347	0.99947	-0.23668	0.01413	1	0.8545	1.50528	0.74098	1.99364	2.48542	0.18741	0.59767	0.53086	0.99833	0.00502	-0.04329	1	1.09117	1.43442	0.78187	2.23032	2.3944	0.2213	0.83435	0.4965	0.99886	0.2417	-0.0552	1	1.13914
ENST00000078429	1.74788	0.11736	0.41632	-0.12195	-1.60561	0.67875	0.1178	1.23716	0.87968	0.02801	0.38543	0.99975	-0.08236	-0.85759	0.97858	-0.03949	-0.47393	0.99916	0.07738	0.65667	0.99479	0.23975	2.71101	0.09566	0.14996	1.94581	0.44989	0.03958	0.69352	0.99299	0.08246	1.06655	0.93781	0.19933	2.19256	0.29959	-0.08979	-0.85465	0.97895	-0.20017	-1.9924	0.41957	-0.15729	-1.63091	0.66221	-0.04042	-0.58361	0.99728	-0.11037
ENST00000078527	0.1512	0.98845	0.9975	-0.43992	-0.41012	0.99957	-1.15493	0.06026	1	-0.43668	-0.36577	0.99978	0.38373	0.29461	0.99993	-0.63546	-0.41546	0.99955	-0.4931	-0.42502	0.99948	-0.715	0.47278	0.99908	0.00324	0.04448	1	0.82365	0.68245	0.99243	-0.19554	-0.01591	1	-0.05317	-0.02571	1	0.71825	-0.42667	0.99949	1.53865	0.23798	0.99998	0.51947	-0.47617	0.99905	0.66183	-0.48669	0.99892	0.82041
ENST00000080059	1.95492	0.07924	0.34005	0.94374	1.94067	0.45991	1.07762	1.934	0.46463	-0.09129	0.4901	0.99895	0.72077	1.94449	0.45729	1.14135	2.29935	0.25664	0.07667	0.21298	0.99999	0.13387	0.14136	1	-1.03504	-1.46013	0.76717	-0.22298	0.02305	1	0.19761	0.4221	0.99953	-0.86708	-1.66857	0.63851	-1.16891	-1.49444	0.74725	-0.35685	-0.11874	1	0.06374	0.2581	0.99997	-1.00095	-1.6889	0.62534	0.81206
ENST00000081029	1.08785	0.37447	0.70415	-0.0715	-0.9021	0.97229	-0.11113	-1.26195	0.86914	0.10308	0.81743	0.98323	-0.06406	-0.67026	0.99416	-0.09361	-1.28008	0.86119	0.03447	-0.22418	0.99999	-0.03963	-0.41278	0.99962	0.17458	1.68319	0.62748	0.00743	0.20127	0.99999	-0.02211	-0.4031	0.99967	0.10597	0.64341	0.99533	0.21421	1.98984	0.42154	0.04706	0.59052	0.99709	0.01752	0.02124	1	0.1456	1.00738	0.95243	-0.16714
ENST00000082468	1.3401	0.24569	0.59079	0.3707	0.98856	0.95272	-0.98067	-0.71835	0.99083	1.59194	1.56166	0.7064	0.79667	1.4115	0.7904	0.36955	1.19826	0.88985	0.89165	1.22482	0.87829	-1.35137	-1.65832	0.64672	1.22124	0.62255	0.99501	0.42597	0.45579	0.99915	-0.00115	0.23462	0.99998	0.52095	0.29298	0.99994	2.57261	2.17253	0.3498	1.77733	2.03912	0.4146	1.35022	1.84048	0.52984	1.87232	1.84739	0.52802	-0.79527
ENST00000083182	0.39852	0.87856	0.96085	-0.0977	-1.20913	0.89064	-0.0174	-0.06126	1	-0.00596	0.00062	1	0.00669	-0.01188	1	-0.0119	0.0278	1	-0.0101	-0.10347	1	0.0803	1.06325	0.93849	0.09174	1.1794	0.90181	0.10439	1.14419	0.91407	0.0858	1.18728	0.89894	0.0876	1.06237	0.93875	0.01144	0.0605	1	0.02409	0.04779	1	0.0055	0.08501	1	0.0073	-0.03736	1	0.01265
ENST00000084795	0.37164	0.89548	0.96725	-0.00783	0.24708	0.99998	-0.14045	-0.60166	0.99678	-0.20167	-0.84431	0.98022	-0.22013	-0.91053	0.97101	-0.16499	-0.65292	0.99495	-0.04644	-0.46374	0.99926	-0.13262	-0.82759	0.98215	-0.19384	-1.07695	0.93493	-0.2123	-1.1405	0.91555	-0.15717	-0.88544	0.9748	-0.03861	-0.69755	0.99276	-0.06122	-0.19115	1	-0.07968	-0.26546	0.99997	-0.02455	-0.02695	1	0.09401	0.14499	1	-0.01846
ENST00000084798	4.78395	0.00024	0.00621	-0.31476	-2.95628	0.05462	-0.05812	-0.75512	0.98863	-0.38233	-3.70068	0.00541	-0.40518	-3.78944	0.00406	-0.1768	-0.83566	0.98081	-0.08074	-0.85011	0.97905	0.25664	1.96542	0.44119	-0.06757	-0.7658	0.98782	-0.09042	-0.91043	0.97044	0.13796	2.01886	0.40689	0.23403	1.99372	0.42272	-0.32421	-2.65094	0.11858	-0.34706	-2.75747	0.09203	-0.11868	-0.04007	1	-0.02261	-0.05786	1	-0.02285
ENST00000085068	1.31892	0.25529	0.60059	0.17632	0.64254	0.9953	0.15194	0.46915	0.99919	0.16263	0.88712	0.97427	-0.00926	-0.46416	0.99924	0.20898	0.40141	0.99967	-0.22321	-1.53925	0.72086	-0.02438	-0.12863	1	-0.01369	0.246	0.99998	-0.18558	-1.06444	0.93779	0.03267	-0.21317	0.99999	-0.39953	-2.12521	0.34052	0.01069	0.35856	0.99983	-0.1612	-0.87507	0.97595	0.05704	-0.07604	1	-0.37515	-1.86495	0.50531	-0.17189
ENST00000085079	3.29915	0.00519	0.06194	-0.35241	-2.25134	0.26835	0.23567	1.26645	0.86727	-0.18109	-1.06385	0.93854	-0.30366	-1.83066	0.52719	-0.07828	-0.40525	0.99966	0.18728	0.97298	0.95981	0.58808	3.3211	0.01577	0.17132	1.14662	0.91353	0.04875	0.35205	0.99985	0.27412	1.75745	0.5771	0.53969	3.11928	0.03014	-0.41675	-2.22194	0.28377	-0.53933	-2.91432	0.05532	-0.31395	-1.59872	0.68323	-0.04839	-0.31934	0.99992	-0.12258
ENST00000155093	0.23851	0.963	0.9906	0.5159	0.60439	0.99616	-0.07634	-0.24475	0.99998	-0.10301	-0.21402	0.99999	-0.13711	-0.29417	0.99994	0.57588	0.461	0.99916	0.04824	-0.24825	0.99998	-0.59224	-0.80581	0.98254	-0.61891	-0.80466	0.98263	-0.65301	-0.87795	0.97307	0.05998	-0.11489	1	-0.46766	-0.82186	0.98073	-0.02667	0.04148	1	-0.06077	-0.03557	1	0.65222	0.66329	0.99373	0.12458	0.00233	1	-0.0341
ENST00000155840	3.31763	0.00501	0.06058	0.46721	2.62729	0.13434	0.42514	2.39897	0.21509	0.76757	3.99771	0.00313	0.40628	2.47584	0.18541	0.60707	3.4784	0.01473	0.44371	2.35117	0.23463	-0.04207	-0.05652	1	0.30036	1.39062	0.8043	-0.06093	-0.09051	1	0.13986	0.93174	0.96579	-0.0235	-0.1865	1	0.34243	1.36653	0.81682	-0.01886	-0.02977	1	0.18192	0.93342	0.96555	0.01857	-0.12073	1	-0.36129
ENST00000155926	6.0353	2e-05	0.00078	0.28114	2.85812	0.06601	0.2551	2.83961	0.06938	0.43711	4.72992	6e-05	0.52393	4.82714	4e-05	0.26654	3.12038	0.0309	0.13181	1.43406	0.7832	-0.02604	0.15694	1	0.15597	1.89531	0.48433	0.24279	2.07081	0.37188	-0.0146	0.34146	0.99987	-0.14933	-1.34	0.83282	0.18201	1.63705	0.65828	0.26884	1.81125	0.54105	0.01144	0.16965	1	-0.12329	-1.4173	0.79247	0.08682
ENST00000156084	1.51039	0.18033	0.51403	-0.04913	0.30269	0.99992	0.68398	1.66736	0.64615	0.67474	1.74891	0.59975	0.79016	1.86397	0.5372	1.08272	1.8691	0.53331	1.42243	2.87352	0.15123	0.73311	1.39897	0.79371	0.72387	1.46527	0.7591	0.83929	1.57975	0.69673	1.13185	1.59624	0.68743	1.47156	2.60229	0.22008	-0.00923	-0.01533	1	0.10618	0.08147	1	0.39874	0.15221	1	0.73845	1.05174	0.92774	0.11541
ENST00000156109	0.83919	0.54241	0.81243	0.05515	0.82896	0.98195	-0.05321	-0.87031	0.97685	0.07434	1.08381	0.93288	-0.00464	-0.01475	1	-0.00442	-0.3346	0.99989	-0.01616	-0.13543	1	-0.10836	-1.63163	0.66179	0.01919	0.26318	0.99997	-0.0598	-0.80883	0.98409	-0.05957	-1.12461	0.92058	-0.07132	-0.9334	0.96713	0.12755	1.85915	0.50822	0.04856	0.82358	0.98254	0.04879	0.52491	0.9985	0.03704	0.71614	0.99164	-0.07898
ENST00000156471	0.18014	0.98172	0.99541	0.10834	0.64282	0.99528	0.15257	0.78873	0.9859	0.14535	0.73455	0.99031	0.18441	0.79526	0.98525	0.12227	0.80329	0.9845	0.123	0.51307	0.99866	0.04423	0.18624	1	0.03702	0.10034	1	0.07607	0.17478	1	0.01393	0.17912	1	0.01467	-0.11118	1	-0.00721	-0.0895	1	0.03184	-0.01574	1	-0.0303	-0.01262	1	-0.02956	-0.2865	0.99995	0.03905
ENST00000156825	0.87806	0.51378	0.79735	0.20282	0.91366	0.97047	0.2796	0.74021	0.99004	0.43816	1.67171	0.63518	0.20875	0.69617	0.99283	0.52329	1.97335	0.43221	0.43654	1.26785	0.86657	0.07679	-0.10203	1	0.23535	0.7713	0.98761	0.00593	-0.18174	1	0.32048	1.08708	0.93199	0.23373	0.39224	0.99972	0.15856	0.81893	0.98306	-0.07086	-0.07038	1	0.24369	1.11424	0.92388	0.15694	0.46501	0.99925	-0.22941
ENST00000157600	1.38027	0.22951	0.57222	-0.18145	-1.27112	0.86524	0.11068	0.66456	0.99444	0.14866	0.95271	0.96374	-0.1006	-0.67291	0.99405	0.08637	0.9486	0.96451	0.01604	0.22586	0.99999	0.29213	1.8326	0.52585	0.33011	2.17752	0.30789	0.08085	0.55519	0.99794	0.26782	2.1591	0.31823	0.19749	1.44906	0.77488	0.03798	0.2333	0.99999	-0.21128	-1.26684	0.86711	-0.02431	0.2389	0.99998	-0.09463	-0.43467	0.99949	-0.24926
ENST00000157812	1.65266	0.13978	0.45324	-0.16338	-1.44701	0.77597	-0.23429	-2.18588	0.30373	-0.19547	-1.93993	0.45406	-0.02606	-0.31277	0.99992	-0.16315	-1.72639	0.59832	-0.23116	-2.33094	0.22979	-0.07091	-0.81792	0.98318	-0.03209	-0.50968	0.99873	0.13732	1.0756	0.93524	0.00023	-0.32225	0.99991	-0.06778	-0.91356	0.97049	0.03882	0.32641	0.9999	0.20823	1.80897	0.54214	0.07113	0.49015	0.99898	0.00313	-0.06198	1	0.16941
ENST00000158166	2.58238	0.02242	0.1655	-0.45114	-0.66987	0.99183	-1.25247	-2.32765	0.29818	0.39278	1.05571	0.92521	0.61535	1.62587	0.67502	-0.92375	-1.60196	0.68382	-0.85094	-1.18255	0.88824	-0.80133	-1.69304	0.62966	0.84392	1.72432	0.61941	1.06649	2.31335	0.34665	-0.47261	-0.95489	0.95646	-0.3998	-0.54019	0.99762	1.64525	3.32392	0.07412	1.86782	3.91832	0.03911	0.32872	0.72925	0.98895	0.40153	1.12468	0.91253	0.22257
ENST00000158526	0.87968	0.51239	0.79652	1.4114	2.0008	0.4305	0.75706	0.85332	0.97771	0.04433	0.12441	1	0.37546	0.44081	0.99939	0.64505	0.98169	0.95586	0.33554	0.17771	1	-0.65434	-1.0243	0.94488	-1.36707	-1.85773	0.51912	-1.03594	-1.50674	0.73899	-0.76635	-0.95603	0.96016	-1.07586	-1.74797	0.58928	-0.71273	-0.72977	0.99005	-0.3816	-0.4194	0.99954	-0.11201	0.09276	1	-0.42152	-0.65673	0.99433	0.33113
ENST00000158762	2.04768	0.06586	0.30881	0.19892	1.15496	0.90814	0.06169	0.40939	0.99961	-0.08709	-0.54201	0.99809	0.43122	2.5061	0.17579	0.00014	0.04298	1	-0.12098	-0.39521	0.99969	-0.13722	-0.66208	0.99417	-0.28601	-1.65379	0.64848	0.23231	1.35693	0.82157	-0.19878	-1.05809	0.93792	-0.31989	-1.4954	0.74657	-0.14879	-0.89651	0.97191	0.36953	1.92784	0.47099	-0.06156	-0.35212	0.99984	-0.18267	-0.75995	0.98795	0.51832
ENST00000158771	0.84832	0.5356	0.80882	0.00074	-0.18354	1	-0.15411	-1.94628	0.45127	-0.07061	-0.79813	0.98504	-0.09351	-1.11047	0.9246	-0.09711	-1.17455	0.90332	-0.08405	-0.88532	0.97459	-0.15485	-1.74849	0.58393	-0.07135	-0.60642	0.99659	-0.09425	-0.91832	0.96943	-0.09785	-0.98061	0.95791	-0.08479	-0.69534	0.9928	0.0835	1.15899	0.90879	0.0606	0.83313	0.98132	0.057	0.77999	0.98675	0.07006	1.05897	0.93944	-0.02291
ENST00000159087	0.79338	0.57703	0.83014	0.5841	0.81124	0.98326	0.64325	1.21099	0.88825	-0.99185	-0.69188	0.99289	0.2688	0.66135	0.99432	-0.60717	0.06831	1	-0.14256	0.23059	0.99999	0.05914	0.42852	0.9995	-1.57596	-1.49018	0.75004	-0.31531	-0.12831	1	-1.19127	-0.74813	0.98909	-0.72667	-0.56368	0.99765	-1.6351	-1.85823	0.51229	-0.37445	-0.54359	0.99806	-1.25042	-1.1516	0.91026	-0.78581	-0.96684	0.95986	1.26065
ENST00000159111	0.34071	0.91406	0.97363	0.51619	0.34864	0.99986	0.95596	0.97693	0.95842	0.43892	0.42097	0.99957	0.20664	-0.28206	0.99996	0.54357	0.22469	0.99999	0.69197	0.77798	0.98687	0.43977	0.64069	0.99533	-0.07727	0.07386	1	-0.30955	-0.597	0.99685	0.02738	-0.10518	1	0.17578	0.42357	0.99955	-0.51703	-0.56704	0.99762	-0.74932	-1.17397	0.90303	-0.41239	-0.71724	0.99141	-0.26399	-0.23754	0.99998	-0.23228
ENST00000160262	2.5916	0.0219	0.16314	2.26684	4.28807	0.02322	1.76881	2.61701	0.20193	2.30412	3.6621	0.0501	1.77496	2.73424	0.18391	1.50327	2.4102	0.26383	1.65759	2.43125	0.2629	-0.49803	-1.11243	0.90577	0.03727	-0.4556	0.99868	-0.49188	-1.33753	0.81545	-0.76357	-1.39418	0.79131	-0.60926	-1.37891	0.79805	0.53531	0.677	0.99028	0.00615	-0.10496	1	-0.26554	-0.22893	0.99998	-0.11122	-0.21599	0.99999	-0.52915
ENST00000160373	1.7627	0.11239	0.40696	0.11527	0.09246	1	0.73789	1.74965	0.59261	-0.4185	-1.14066	0.91052	0.65677	1.53535	0.72162	0.24413	1.00133	0.94958	-0.02624	0.17075	1	0.62261	1.64952	0.65407	-0.53378	-1.21842	0.88153	0.5415	1.43209	0.77863	0.12885	0.90244	0.96903	-0.14152	0.07975	1	-1.15639	-2.7591	0.12781	-0.08111	-0.26898	0.99996	-0.49376	-0.77138	0.98544	-0.76413	-1.54505	0.71612	1.07528
ENST00000160740	0.60722	0.72413	0.90038	0.27709	0.07517	1	0.88057	1.147	0.91126	-0.20738	-0.19657	0.99999	-0.64985	-0.63546	0.9955	-0.33241	-0.25381	0.99998	0.23444	0.55268	0.99792	0.60348	1.05798	0.93815	-0.48447	-0.2654	0.99997	-0.92694	-0.69231	0.9928	-0.6095	-0.32089	0.99991	-0.04264	0.46634	0.9992	-1.08795	-1.30638	0.84705	-1.53041	-1.6937	0.62211	-1.21298	-1.35353	0.82443	-0.64612	-0.62808	0.99569	-0.44247
ENST00000160827	0.62198	0.71234	0.89502	0.38786	0.89182	0.97369	-0.21458	-0.11812	1	0.04301	0.64419	0.99527	0.59133	1.42528	0.78788	-0.07376	0.04434	1	-0.09951	0.06257	1	-0.60243	-0.96217	0.96172	-0.34485	-0.24989	0.99998	0.20348	0.563	0.99774	-0.46162	-0.82174	0.98267	-0.48736	-0.8111	0.9838	0.25758	0.72689	0.99091	0.80591	1.47125	0.76177	0.14081	0.15659	1	0.11507	0.17483	1	0.54833
ENST00000161559	0.45916	0.83726	0.94581	0.66774	1.14881	0.90918	0.65649	0.97643	0.95666	0.55758	1.25921	0.86675	0.24637	0.5264	0.99833	0.24874	0.22798	0.99999	0.15217	0.30281	0.99993	-0.01125	-0.09179	1	-0.11016	0.1126	1	-0.42137	-0.59545	0.99661	-0.41901	-0.86505	0.97592	-0.51557	-0.80571	0.98324	-0.09891	0.19698	0.99999	-0.41012	-0.4667	0.99914	-0.40776	-0.72157	0.99055	-0.50432	-0.66509	0.99389	-0.31121
ENST00000161863	1.92432	0.08363	0.34935	-0.01062	-0.37767	0.99977	-0.00514	-0.19424	1	0.01716	-0.17092	1	0.10785	0.36085	0.99982	-0.19888	-1.96363	0.43904	-0.19438	-2.18654	0.30418	0.00548	0.15824	1	0.02778	0.19847	0.99999	0.11847	0.71596	0.99161	-0.18825	-1.57739	0.69694	-0.18375	-1.79869	0.54942	0.02231	0.03074	1	0.11299	0.52255	0.99853	-0.19373	-1.6369	0.65835	-0.18923	-1.84451	0.51834	0.09069
ENST00000162044	1.98394	0.07405	0.32892	-0.86976	-1.67293	0.63567	-1.18314	-2.42442	0.19993	-0.75581	-1.50424	0.74152	-1.19874	-2.3913	0.21453	-1.37241	-3.05921	0.04345	-0.64186	-1.18876	0.89662	-0.31339	-0.85289	0.97861	0.11395	0.13413	1	-0.32899	-0.76793	0.98753	-0.50265	-1.45155	0.77262	0.2279	0.44068	0.99942	0.42734	0.95968	0.96151	-0.0156	0.11029	1	-0.18926	-0.5318	0.99834	0.54128	1.24344	0.87565	-0.44294
ENST00000162330	0.93211	0.47529	0.77376	0.07397	0.22678	0.99999	-0.17404	-0.61157	0.99626	-0.58654	-1.69614	0.6205	-0.46827	-1.37788	0.81177	-0.34495	-0.49957	0.9988	-0.24255	-0.75152	0.98871	-0.24802	-0.81846	0.98228	-0.66051	-1.90305	0.48451	-0.54225	-1.58627	0.69135	-0.41892	-0.7162	0.99122	-0.31653	-0.96699	0.95957	-0.4125	-0.96247	0.96059	-0.29423	-0.68348	0.99317	-0.1709	0.13316	1	-0.06851	-0.10392	1	0.11827
ENST00000162391	7.30151	0	0.0001	-0.39692	-4.5458	0.00012	-0.02599	-0.14068	1	-0.14846	-1.52618	0.72903	-0.44242	-4.88207	2e-05	-0.16724	-1.57074	0.70117	-0.15334	-1.64409	0.65355	0.37092	4.06194	0.00102	0.24846	2.92768	0.05377	-0.0455	-0.46212	0.99927	0.22968	2.80153	0.07601	0.24358	2.74849	0.08739	-0.12247	-1.27611	0.8629	-0.41643	-4.38868	0.00025	-0.14124	-1.32386	0.84082	-0.12735	-1.39582	0.80423	-0.29396
ENST00000162749	1.63189	0.14401	0.461	0.1633	0.65133	0.99499	0.81804	2.07679	0.368	0.68606	1.57856	0.69619	0.01372	0.1205	1	0.5296	1.31784	0.84359	0.90601	2.221	0.28573	0.65474	1.47356	0.76051	0.52276	0.94093	0.96572	-0.14958	-0.50654	0.99877	0.3663	0.69049	0.99311	0.74271	1.59143	0.68795	-0.13198	-0.56949	0.99761	-0.80432	-1.90506	0.47783	-0.28844	-0.78593	0.98626	0.08797	0.05974	1	-0.67234
ENST00000163416	0.75344	0.60788	0.84614	-0.0888	-1.12956	0.91893	-0.07305	-1.10894	0.92541	-0.11039	-1.62962	0.66313	-0.01159	-0.05687	1	-0.06348	-0.87798	0.97577	-0.11079	-1.30784	0.84835	0.01575	-0.04656	1	-0.0216	-0.51048	0.99871	0.07721	1.02533	0.94812	0.02531	0.21586	0.99999	-0.02199	-0.2022	0.99999	-0.03735	-0.43478	0.99949	0.06146	1.01377	0.95085	0.00956	0.24904	0.99998	-0.03774	-0.14507	1	0.09881
ENST00000163678	0.35633	0.90472	0.97039	0.28182	0.60724	0.99648	-0.07694	-0.16175	1	-0.00888	0.03062	1	0.26571	0.66813	0.99404	-0.10114	-0.42069	0.99956	-0.07536	-0.38562	0.99974	-0.35876	-0.72442	0.99084	-0.2907	-0.55855	0.99778	-0.01611	0.08163	1	-0.38296	-0.99927	0.95333	-0.35718	-0.96538	0.96045	0.06806	0.18565	1	0.34264	0.77864	0.98655	-0.0242	-0.23431	0.99999	0.00158	-0.20261	0.99999	0.27458
ENST00000164133	0.86725	0.52168	0.80135	-0.01996	-0.28329	0.99996	-0.01327	-0.02528	1	0.07573	1.42919	0.78592	0.00388	0.201	0.99999	-0.01096	-0.08445	1	-0.06152	-0.78179	0.98668	0.00669	0.23768	0.99999	0.09569	1.6863	0.62549	0.02384	0.46958	0.9992	0.009	0.18782	1	-0.04156	-0.50127	0.99884	0.08901	1.35227	0.82674	0.01715	0.2115	0.99999	0.00232	-0.05424	1	-0.04825	-0.7038	0.99238	-0.07186
ENST00000164139	10.5273	0	0	-0.41491	-4.49888	0.00014	0.01398	0.12689	1	-0.42365	-4.47986	0.00015	-0.51938	-5.43271	0	-0.13143	-1.51323	0.73701	-0.06029	-0.68124	0.99364	0.42889	4.26783	0.0004	-0.00874	-0.038	1	-0.10447	-1.06475	0.93833	0.28348	2.80263	0.07502	0.35462	3.65441	0.00481	-0.43763	-4.24943	0.00043	-0.53336	-5.13855	1e-05	-0.14541	-1.52561	0.72944	-0.07427	-0.75646	0.98885	-0.09573
ENST00000164227	0.87601	0.51524	0.7982	-0.08945	-0.44274	0.99942	0.09681	0.26951	0.99997	0.27997	1.35358	0.82526	0.04265	0.44102	0.99943	-0.00953	0.03659	1	0.1857	1.29284	0.85453	0.18626	0.67535	0.99378	0.36942	1.76898	0.5709	0.1321	0.86116	0.97766	0.07992	0.46255	0.99925	0.27515	1.70968	0.61048	0.18316	0.99381	0.95469	-0.05416	0.14936	1	-0.10634	-0.22698	0.99999	0.08889	0.93954	0.96555	-0.23732
ENST00000164305	0.88497	0.5087	0.7948	0.79872	1.52017	0.73072	0.31966	0.93522	0.96373	-0.00259	0.04377	1	0.53128	1.39461	0.79982	0.40962	0.92589	0.96547	0.0219	-0.19177	1	-0.47906	-0.50402	0.99856	-0.80131	-1.45207	0.76906	-0.26744	-0.10334	1	-0.38909	-0.54293	0.99782	-0.77681	-1.64489	0.65596	-0.32225	-0.87968	0.97305	0.21161	0.39914	0.99962	0.08996	-0.02768	1	-0.29776	-1.07936	0.9297	0.53386
ENST00000164640	1.35768	0.23719	0.58152	0.43555	0.87091	0.96897	-0.70623	-0.16303	1	0.79419	2.15685	0.40683	1.54769	3.32358	0.11454	0.39336	1.03781	0.93303	0.39421	0.78822	0.98095	-1.14178	-1.00045	0.94401	0.35864	1.26613	0.84764	1.11215	2.35142	0.35188	-0.04219	0.21828	0.99998	-0.04134	-0.03382	1	1.50042	2.23716	0.36069	2.25393	3.35376	0.09679	1.09959	1.15218	0.89932	1.10044	0.91815	0.96214	0.75351
ENST00000165698	3.30458	0.00508	0.06108	0.70373	1.91577	0.47394	0.86081	2.04956	0.38989	-0.42335	-0.97868	0.95805	0.69338	1.50553	0.74098	-0.33453	-0.72718	0.99078	0.79592	1.6594	0.64411	0.15708	0.28026	0.99996	-1.12708	-2.82581	0.07804	-0.01035	-0.31816	0.99991	-1.03826	-2.56737	0.1443	0.09219	-0.16058	1	-1.28417	-2.88178	0.06829	-0.16743	-0.56786	0.99754	-1.19534	-2.64575	0.1214	-0.0649	-0.42035	0.99956	1.11673
ENST00000166139	1.32164	0.25386	0.59898	0.06641	0.8777	0.97545	0.31693	1.47487	0.7593	0.24916	1.21889	0.88599	0.74302	2.27444	0.2651	0.22586	1.18225	0.90004	0.56711	2.25816	0.27127	0.25053	0.66071	0.99446	0.18275	0.35841	0.99983	0.67661	1.45555	0.77014	0.15946	0.33986	0.99987	0.50071	1.42291	0.78865	-0.06777	-0.31536	0.99992	0.42608	0.74566	0.9893	-0.09107	-0.32076	0.99991	0.25018	0.70137	0.99233	0.49386
ENST00000166534	0.50965	0.79988	0.93251	0.63991	1.55355	0.71127	-0.12005	0.19322	0.99999	-0.16664	0.33038	0.99985	0.36271	1.24809	0.86015	-0.56376	0.2879	0.99994	-0.16442	0.06355	1	-0.75996	-1.26066	0.85568	-0.80655	-1.2003	0.87937	-0.2772	-0.28072	0.99993	-1.20367	-1.22851	0.87024	-0.80432	-1.43235	0.77566	-0.04659	0.11889	1	0.48276	0.97866	0.94852	-0.44371	0.08037	1	-0.04437	-0.1277	1	0.52935
ENST00000167106	8.60777	0	1e-05	0.51574	5.74433	0	0.37189	3.81963	0.00276	0.4186	4.78388	4e-05	0.6029	5.99164	0	0.26937	3.70019	0.0043	0.28529	3.2695	0.01922	-0.14385	-1.52742	0.72822	-0.09714	-0.87806	0.97573	0.08716	0.48304	0.99906	-0.24637	-1.88149	0.49338	-0.23045	-2.29955	0.24565	0.04672	0.68202	0.99356	0.23101	1.92926	0.46173	-0.10252	-0.27496	0.99996	-0.0866	-0.66674	0.99431	0.18429
ENST00000167218	0.43574	0.85354	0.95187	-0.39238	-0.86098	0.97568	-0.32729	-0.41244	0.99956	-0.35645	-1.04549	0.9388	-0.32025	-0.63813	0.99484	0.26801	0.2255	0.99999	-0.12412	0.08378	1	0.06509	0.40097	0.99963	0.03593	-0.20094	0.99999	0.07213	0.20316	0.99999	0.66039	1.04103	0.93979	0.26826	0.91872	0.96686	-0.02916	-0.58335	0.9969	0.00705	-0.20032	0.99999	0.5953	0.60678	0.9961	0.20318	0.48139	0.99894	0.03621
ENST00000167825	1.26702	0.27862	0.62348	0.50578	1.66544	0.65484	-0.44829	-0.3751	0.99964	-0.60331	-1.37412	0.80317	-0.59729	-0.9507	0.95334	-0.40812	-1.26136	0.85458	-0.45728	-1.07644	0.92169	-0.95407	-1.91411	0.52331	-1.10908	-3.05275	0.14033	-1.10307	-2.61187	0.24582	-0.91389	-2.87265	0.17128	-0.96305	-2.67923	0.21888	-0.15502	-0.90531	0.9641	-0.149	-0.51306	0.99802	0.04017	-0.81464	0.97848	-0.00899	-0.64764	0.99323	0.00602
ENST00000168216	3.49615	0.00346	0.04643	0.22607	2.35996	0.21723	-0.04629	-0.25905	0.99998	0.29506	2.78412	0.08016	0.21974	1.99661	0.41764	0.04911	0.11719	1	-0.04195	-0.35466	0.99984	-0.27236	-2.45337	0.17812	0.06899	0.46203	0.99927	-0.00633	-0.27492	0.99996	-0.17696	-2.14072	0.32971	-0.26802	-2.62635	0.11937	0.34135	2.84386	0.06834	0.26602	2.11286	0.34605	0.0954	0.35762	0.99983	0.00434	-0.0803	1	-0.07533
ENST00000168977	11.2134	0	0	1.22413	5.06061	1e-05	-0.11937	-0.72371	0.99119	0.59672	2.06621	0.37311	1.44985	5.20874	0	0.10837	0.09394	1	0.18624	0.01339	1	-1.3435	-5.40643	0	-0.6274	-2.87523	0.06173	0.22572	0.4151	0.99961	-1.11576	-4.76602	4e-05	-1.03789	-4.8289	3e-05	0.71609	2.59912	0.12629	1.56922	5.5404	0	0.22774	0.77797	0.98707	0.30561	0.70294	0.99246	0.85313
ENST00000169293	3.42451	0.00406	0.05203	-0.66753	-3.00363	0.04444	-0.12438	-0.63665	0.99555	0.02781	-0.17845	1	-0.57637	-2.7355	0.09232	0.13822	0.26388	0.99997	0.015	-0.85791	0.97835	0.54315	2.11747	0.34424	0.69534	2.71834	0.09638	0.09115	0.15188	1	0.80575	3.09582	0.03401	0.68253	1.97732	0.43062	0.15219	0.45361	0.99934	-0.45199	-1.90286	0.47965	0.2626	0.85286	0.97898	0.13938	-0.18955	1	-0.60418
ENST00000169298	2.2795	0.04163	0.23919	0.10993	1.01648	0.95025	-0.02708	0.17793	1	0.32448	2.64114	0.1155	0.44252	2.83079	0.0712	0.20363	1.19736	0.89519	0.09397	1.14191	0.91492	-0.13701	-0.7681	0.98785	0.21455	1.62491	0.66622	0.33259	1.84483	0.51822	0.0937	0.22023	0.99999	-0.01596	0.15423	1	0.35155	2.28668	0.25196	0.46959	2.48228	0.1676	0.23071	0.94705	0.96466	0.12105	0.89517	0.97329	0.11804
ENST00000169551	2.51462	0.02582	0.18119	0.14863	1.07022	0.93664	-0.12685	-1.4041	0.79972	0.1107	0.92583	0.9684	0.05703	0.23494	0.99999	0.01344	-0.09312	1	-0.1484	-2.03752	0.3916	-0.27548	-2.38059	0.2082	-0.03793	-0.128	1	-0.0916	-0.79037	0.98588	-0.13519	-1.11693	0.92296	-0.29703	-3.03917	0.03924	0.23755	2.22782	0.28174	0.18387	1.56474	0.70496	0.14029	1.26241	0.86885	-0.02155	-0.54106	0.99821	-0.05368
ENST00000170168	1.20509	0.3097	0.65264	-0.13833	-0.86717	0.97726	0.21495	1.11024	0.92504	0.01721	0.18238	1	-0.09582	-0.53782	0.99827	-0.06358	-0.22959	0.99999	0.22374	1.27558	0.86309	0.35328	1.8992	0.48138	0.15554	1.02629	0.94796	0.04251	0.29897	0.99994	0.07475	0.60508	0.99666	0.36207	2.0982	0.35454	-0.19774	-0.91993	0.96939	-0.31077	-1.56978	0.70178	-0.27853	-1.28524	0.85877	0.00879	0.11213	1	-0.11303
ENST00000170447	0.31422	0.92829	0.97833	0.04055	0.49938	0.99887	0.06197	0.03603	1	0.07617	0.94992	0.96417	0.06182	0.56301	0.99777	-0.01622	0.14273	1	0.02435	-0.24338	0.99998	0.02142	-0.42289	0.99956	0.03562	0.45095	0.99937	0.02126	0.07999	1	-0.05677	-0.33722	0.99988	-0.01621	-0.71868	0.99148	0.0142	0.8366	0.98108	-0.00015	0.48464	0.99904	-0.07819	0.09659	1	-0.03763	-0.25995	0.99997	-0.01435
ENST00000170564	0.18084	0.98153	0.99541	0.03062	0.25384	0.99998	0.15786	0.30967	0.99993	0.00908	0.04797	1	-0.10364	-0.48854	0.99897	0.04016	0.02512	1	-0.03685	-0.43863	0.99945	0.12725	0.07482	1	-0.02154	-0.19988	0.99999	-0.13426	-0.72906	0.9906	0.00954	-0.21688	0.99999	-0.06746	-0.68161	0.99347	-0.14879	-0.25917	0.99997	-0.26151	-0.74983	0.98909	-0.1177	-0.27366	0.99996	-0.19471	-0.70546	0.99213	-0.11272
ENST00000171111	0.68	0.66609	0.87457	-1.16781	-1.51258	0.73676	-1.2414	-1.41086	0.79497	-1.22368	-1.66407	0.64117	-0.95841	-1.40028	0.80043	-0.36835	-0.58894	0.997	-0.96614	-1.01432	0.94975	-0.07359	0.02228	1	-0.05587	-0.18714	1	0.2094	0.03798	1	0.79946	0.84953	0.97903	0.20167	0.4649	0.99922	0.01772	-0.19805	0.99999	0.28299	0.01478	1	0.87305	0.78468	0.98609	0.27526	0.41748	0.99958	0.26527
ENST00000171887	0.80364	0.56914	0.82627	0.66977	0.30152	0.99993	1.85463	1.70739	0.61582	1.06559	-0.19963	0.99999	0.36811	-0.2327	0.99999	0.45404	-0.50699	0.9987	0.37136	-0.31952	0.99991	1.18486	1.39415	0.80079	0.39582	-0.45978	0.99921	-0.30167	-0.49959	0.99876	-0.21573	-0.76006	0.98785	-0.29841	-0.57841	0.9972	-0.78904	-1.74674	0.59178	-1.48653	-1.80822	0.55228	-1.40059	-2.03713	0.41019	-1.48327	-1.8632	0.51709	-0.69749
ENST00000172229	1.36268	0.2365	0.58078	-0.35745	-0.59159	0.99691	0.20283	0.94524	0.96373	0.13848	0.92928	0.96664	0.399	1.59356	0.68679	0.13758	0.831	0.98098	0.44454	1.69691	0.62026	0.56028	1.49099	0.74928	0.49593	1.50412	0.74155	0.75645	2.16011	0.33043	0.49503	1.39594	0.80251	0.80199	2.25732	0.27836	-0.06435	-0.06498	1	0.19617	0.56958	0.99745	-0.06525	-0.13777	1	0.24171	0.68214	0.99318	0.26052
ENST00000172853	0.47057	0.82892	0.94314	-2.99798	-0.97785	0.95693	-2.06844	-0.94807	0.96288	-3.2443	-1.63539	0.66032	-3.38634	-1.25741	0.86831	-3.13721	-0.99328	0.95369	-3.00122	-1.19988	0.89174	0.92954	-0.06685	1	-0.24631	-0.83332	0.98125	-0.38836	-0.35876	0.99983	-0.13923	-0.05852	1	-0.00324	-0.29428	0.99995	-1.17586	-0.65191	0.99487	-1.3179	-0.24409	0.99998	-1.06877	0.01295	1	-0.93278	-0.18947	1	-0.14205
ENST00000173229	4.26569	0.0007	0.01415	0.31072	2.17814	0.3112	0.54727	3.5504	0.00843	0.36728	2.69101	0.10497	0.55935	3.38347	0.01486	0.61325	3.97047	0.00184	0.59127	3.7185	0.00461	0.23655	1.52331	0.73052	0.05657	0.53609	0.99827	0.24863	1.29104	0.85531	0.30254	1.87203	0.50131	0.28055	1.60893	0.67675	-0.17998	-1.00483	0.95242	0.01208	-0.25955	0.99997	0.06599	0.2847	0.99996	0.044	0.02542	1	0.19207
ENST00000173527	15.8216	0	0	0.35196	3.86499	0.00243	-0.20272	-1.7313	0.59522	0.51101	5.34554	0	0.30739	3.1518	0.02866	-0.02478	-0.0407	1	-0.20984	-2.17099	0.31291	-0.55468	-5.32888	0	0.15906	1.54014	0.72031	-0.04457	-0.56911	0.99761	-0.37673	-3.75803	0.00362	-0.5618	-5.87548	0	0.71373	6.6855	0	0.51011	4.60985	0.00011	0.17794	1.62832	0.66399	-0.00712	-0.35518	0.99984	-0.20362
ENST00000173898	0.11618	0.99431	0.99865	-0.12913	0.08181	1	0.25548	0.46731	0.99902	0.30607	0.66178	0.9934	0.47077	-0.06691	1	0.27738	0.09513	1	0.03751	0.14738	1	0.38461	0.39225	0.99964	0.4352	0.58188	0.9967	0.5999	-0.14443	1	0.4065	0.0183	1	0.16664	0.06927	1	0.05059	0.15233	1	0.21529	-0.50795	0.99837	0.02189	-0.35435	0.9998	-0.21797	-0.31369	0.9999	0.1647
ENST00000174618	2.18005	0.05067	0.26729	-0.15897	-0.84688	0.97972	0.25613	2.19984	0.2987	0.0138	0.49166	0.99895	0.00789	0.18497	1	0.13538	1.48105	0.75601	0.13827	1.51094	0.73818	0.4151	2.96318	0.05075	0.17276	1.31277	0.84572	0.16685	0.99217	0.95545	0.29435	2.28043	0.25655	0.29724	2.31829	0.23818	-0.24234	-1.70427	0.61376	-0.24825	-1.94789	0.45058	-0.12075	-0.75219	0.98904	-0.11786	-0.73384	0.99038	-0.00591
ENST00000175091	2.43	0.03074	0.20022	-0.03313	-0.24473	0.99998	0.01552	0.64464	0.99529	0.06095	1.42854	0.78643	0.01791	0.68613	0.99338	0.10748	2.52564	0.15036	0.12606	2.49184	0.16242	0.04865	0.86722	0.97732	0.09408	1.65262	0.64785	0.05104	0.91498	0.97029	0.14061	2.73799	0.08934	0.15919	2.70908	0.09624	0.04543	0.69834	0.99272	0.00239	0.01815	1	0.09197	1.73815	0.59026	0.11054	1.70682	0.6115	-0.04304
ENST00000175756	1.06267	0.39004	0.71694	0.15318	0.8833	0.97451	-0.26472	0.0655	1	0.14886	0.77192	0.98724	0.6832	2.28663	0.26085	-0.06237	0.48205	0.99905	0.13674	0.73795	0.98996	-0.4179	-0.77291	0.98717	-0.00432	-0.09766	1	0.53002	1.4314	0.78343	-0.21555	-0.38239	0.99975	-0.01644	-0.12001	1	0.41358	0.66899	0.99406	0.94792	2.12228	0.34739	0.20236	0.39361	0.9997	0.40146	0.6387	0.9954	0.53434
ENST00000176183	1.05763	0.39191	0.71844	-0.03606	-0.01736	1	0.0525	0.19007	1	0.42607	1.13683	0.91247	-0.3143	-0.54276	0.99799	-0.59574	-1.14724	0.91005	0.283	0.70858	0.99135	0.08855	0.20535	0.99999	0.46213	1.14794	0.90863	-0.27824	-0.52282	0.99836	-0.55969	-1.12404	0.91765	0.31906	0.72163	0.99045	0.37357	0.87944	0.97355	-0.3668	-0.69338	0.99231	-0.64824	-1.25583	0.86829	0.2305	0.48308	0.99895	-0.74037
ENST00000176195	8.69486	0	1e-05	-1.11209	-3.66132	0.00568	-1.19076	-3.81095	0.00326	-1.74877	-6.25052	0	-0.38982	-1.27281	0.8635	-1.43714	-4.88536	4e-05	-0.85934	-3.07165	0.03784	-0.07866	-0.32875	0.9999	-0.63668	-2.65101	0.11376	0.72228	2.23431	0.28139	-0.32505	-1.30434	0.84977	0.25276	0.46147	0.99927	-0.55802	-2.16863	0.31483	0.80094	2.44426	0.18481	-0.24639	-0.90798	0.97123	0.33142	0.75412	0.98891	1.35896
ENST00000176643	1.01168	0.42211	0.73935	-1.01164	-1.14049	0.91291	0.48334	0.16155	1	0.30703	0.8847	0.97306	0.35113	-0.07705	1	-1.28296	-0.99032	0.95445	0.40555	0.3077	0.99992	1.49498	1.17146	0.90114	1.31868	2.02563	0.41108	1.36278	0.98301	0.95526	-0.27132	0.12857	1	1.41719	1.38316	0.80828	-0.17631	0.63612	0.99508	-0.13221	-0.22363	0.99999	-1.76631	-1.04187	0.94145	-0.0778	0.12573	1	0.0441
ENST00000176763	18.9584	0	0	0.70409	6.9828	0	0.29603	3.16106	0.02794	0.71284	7.05991	0	0.88174	7.60573	0	0.45259	4.3525	0.00034	0.118	0.99723	0.9545	-0.40806	-3.38665	0.01395	0.00875	0.17658	1	0.17765	0.96512	0.96087	-0.25149	-2.38959	0.2066	-0.58609	-5.75458	0	0.41681	3.50451	0.00941	0.58571	4.15988	0.00085	0.15656	1.02423	0.94822	-0.17803	-2.12631	0.33919	0.1689
ENST00000177694	7.61564	0	6e-05	2.01892	4.9002	0.00363	1.08067	2.59906	0.17009	2.44756	5.76358	0.00156	1.97894	4.78668	0.00431	0.46656	1.24888	0.86982	0.46651	1.06617	0.93383	-0.93825	-1.96772	0.47722	0.42864	0.87774	0.96636	-0.03998	-0.02227	1	-1.55236	-3.49782	0.04372	-1.55241	-3.66613	0.03211	1.36689	2.78095	0.16717	0.89827	1.91584	0.50505	-0.6141	-1.36457	0.81439	-0.61415	-1.5282	0.7259	-0.46862
ENST00000177742	1.0694	0.38564	0.71373	-0.14549	-0.94863	0.96377	0.1554	0.88106	0.97481	0.25345	1.11307	0.92305	-0.0675	-0.51867	0.99855	0.10889	0.33312	0.99989	0.08613	0.62411	0.99594	0.30089	1.73861	0.5916	0.39894	2.00726	0.41546	0.07799	0.39402	0.9997	0.25438	1.22751	0.88232	0.23162	1.52359	0.73025	0.09805	0.17494	1	-0.2229	-1.32481	0.83904	-0.04651	-0.53458	0.99828	-0.06927	-0.27338	0.99996	-0.32095
ENST00000178638	2.05731	0.06319	0.30216	-0.56832	-0.66015	0.9937	-0.23838	0.43108	0.9994	0.46245	0.64956	0.99383	1.20366	2.26098	0.33819	1.08325	1.99842	0.45387	1.22134	2.03339	0.44034	0.32995	1.06404	0.93332	1.03078	1.29468	0.84622	1.77199	2.94617	0.12436	1.65157	2.64351	0.17653	1.78967	2.6785	0.17637	0.70083	0.20428	0.99999	1.44204	1.7379	0.60648	1.32162	1.50941	0.73595	1.45972	1.55088	0.71258	0.74121
ENST00000178640	0.35636	0.90477	0.97039	-0.16022	-1.092	0.93032	-0.11885	-0.55098	0.99801	-0.02615	0.01823	1	-0.13297	-0.71153	0.99188	-0.06278	-0.30185	0.99994	-0.00339	-0.02066	1	0.04137	0.47289	0.99916	0.13407	1.0841	0.93259	0.02725	0.34499	0.99986	0.09745	0.75165	0.98913	0.15683	1.03489	0.94572	0.0927	0.5565	0.99789	-0.01412	-0.13459	1	0.05607	0.24952	0.99998	0.11546	0.51534	0.99864	-0.10682
ENST00000179259	2.6938	0.01801	0.14401	-0.48316	-2.5845	0.135	0.03547	0.13932	1	-0.27926	-1.27529	0.86267	-0.19398	-0.95131	0.96352	0.03858	0.30597	0.99993	0.43826	0.84702	0.97956	0.51862	2.51988	0.15675	0.2039	1.27446	0.86314	0.28918	1.53128	0.72572	0.52173	2.77319	0.08513	0.92141	3.26408	0.02128	-0.31473	-1.3142	0.84481	-0.22945	-1.01709	0.94965	0.00311	0.15032	1	0.40279	0.6611	0.99448	0.08528
ENST00000181796	1.58446	0.15733	0.48139	-0.11263	-0.06072	1	0.40768	0.45422	0.99925	-0.30849	-0.33732	0.99987	0.58841	0.99783	0.95083	0.72391	1.18333	0.89582	1.59931	2.44974	0.22128	0.5203	0.51052	0.99855	-0.19587	-0.27732	0.99996	0.70104	1.05681	0.93606	0.83653	1.24163	0.87295	1.71193	2.50697	0.2001	-0.71617	-0.76222	0.98727	0.18074	0.48989	0.99882	0.31623	0.66945	0.99346	1.19163	1.88163	0.51045	0.89691
ENST00000181839	0.57705	0.74788	0.91099	-0.38589	-0.92195	0.96809	0.27085	0.22673	0.99999	-0.48323	-0.84319	0.97961	-1.31352	-1.31527	0.84335	-0.68279	-0.66705	0.99408	-0.92157	-1.08754	0.93049	0.65674	1.08088	0.93204	-0.09735	0.07574	1	-0.92763	-0.38149	0.99975	-0.2969	0.24993	0.99998	-0.53568	-0.17427	1	-0.75408	-1.00719	0.95106	-1.58437	-1.44174	0.77772	-0.95364	-0.84437	0.97948	-1.19242	-1.23278	0.87957	-0.83029
ENST00000182527	3.43567	0.00391	0.05049	0.05831	0.99686	0.95458	0.15775	2.07247	0.37093	0.15883	2.11983	0.3427	0.2861	3.06855	0.03695	0.31613	3.66718	0.00508	0.2691	3.01604	0.04272	0.09945	1.13426	0.91725	0.10053	1.12792	0.9193	0.22779	2.09671	0.35675	0.25783	2.68707	0.10402	0.21079	2.03926	0.39136	0.00108	-0.05869	1	0.12835	0.88051	0.9753	0.15838	1.43212	0.78415	0.11135	0.81404	0.98349	0.12727
ENST00000184266	2.2342	0.0456	0.25185	0.16617	1.68167	0.62845	0.08498	0.47451	0.99915	0.28323	2.86001	0.06445	0.05997	0.43712	0.99947	0.23437	2.16171	0.31686	0.08556	0.37686	0.99978	-0.08119	-1.08114	0.93375	0.11706	1.19141	0.89761	-0.1062	-1.17575	0.90336	0.0682	0.53554	0.99832	-0.08061	-1.23484	0.88062	0.19825	2.17894	0.30724	-0.02501	-0.05205	1	0.14939	1.54762	0.71577	0.00058	-0.10695	1	-0.22326
ENST00000184956	0.46581	0.83248	0.94417	-0.18885	-0.22811	0.99999	-0.13777	-0.19694	1	-0.11483	-0.25686	0.99998	-0.26611	-0.73004	0.99063	0.34895	0.93785	0.96602	0.02017	0.02924	1	0.05108	0.01745	1	0.07402	-0.03322	1	-0.07726	-0.51014	0.9987	0.5378	1.15266	0.91079	0.20902	0.24869	0.99998	0.02294	-0.04842	1	-0.12834	-0.49727	0.99888	0.48672	1.07626	0.93456	0.15794	0.21795	0.99999	-0.15128
ENST00000185150	0.62743	0.70797	0.89331	0.01655	-0.31853	0.99991	-0.02846	-0.44794	0.99938	-0.23892	-1.60425	0.67972	-0.06496	-0.55531	0.99791	-0.14173	-0.98658	0.9567	0.10738	-0.03444	1	-0.04501	-0.14884	1	-0.25547	-1.26448	0.86758	-0.08152	-0.24215	0.99998	-0.15828	-0.66555	0.99432	0.09082	0.27024	0.99997	-0.21046	-1.03498	0.94557	-0.0365	-0.08216	1	-0.11327	-0.47774	0.99911	0.13584	0.39928	0.99968	0.17395
ENST00000185206	2.54152	0.02472	0.1762	-0.28777	-1.94149	0.45269	0.10278	0.45096	0.99937	-0.33842	-2.5395	0.1454	-0.30781	-2.32929	0.22999	-0.11145	-0.56231	0.99779	-0.08937	-0.81066	0.98397	0.39055	2.23824	0.27505	-0.05065	-0.62429	0.99605	-0.02004	-0.44546	0.99941	0.17632	1.30583	0.84951	0.1984	1.06089	0.93935	-0.44121	-2.78259	0.07927	-0.4106	-2.5913	0.12865	-0.21423	-0.95736	0.96287	-0.19215	-1.18962	0.89832	0.03061
ENST00000186436	1.90237	0.08737	0.35666	-0.13052	-1.00698	0.95249	-0.11674	-0.76626	0.98803	-0.05401	-0.39003	0.99973	-0.18807	-1.47989	0.7569	-0.2921	-1.98645	0.42379	-0.33314	-2.86459	0.06408	0.01379	0.1735	1	0.07651	0.59596	0.99694	-0.05754	-0.50195	0.99883	-0.16157	-1.00445	0.95307	-0.20262	-1.88266	0.49224	0.06272	0.38775	0.99974	-0.07133	-0.63878	0.99551	-0.17536	-1.10829	0.92571	-0.21641	-1.92868	0.46153	-0.13405
ENST00000187397	2.93961	0.01032	0.09939	-0.49479	-1.01485	0.94853	-0.46351	-1.21245	0.8866	-0.12851	-0.16552	1	-0.15481	-0.28318	0.99995	-1.17386	-3.51334	0.01291	-0.40938	-0.79363	0.98476	0.03129	-0.26193	0.99997	0.36628	0.83114	0.98063	0.33998	0.70373	0.99184	-0.67907	-2.53307	0.16137	0.08542	0.19082	1	0.33499	1.03719	0.94314	0.30869	0.91594	0.96853	-0.71035	-2.10581	0.35915	0.05413	0.43397	0.99945	-0.0263
ENST00000187762	2.29948	0.04007	0.23426	-0.15891	-2.07442	0.36799	-0.20021	-2.5327	0.14764	-0.16942	-2.2482	0.2698	-0.22696	-2.74801	0.08676	-0.29397	-3.39768	0.0121	-0.14654	-2.23012	0.27924	-0.04129	-0.5934	0.99702	-0.01051	-0.20115	0.99999	-0.06805	-0.72888	0.99085	-0.13506	-1.37565	0.815	0.01238	-0.22272	0.99999	0.03078	0.39596	0.9997	-0.02676	-0.10542	1	-0.09376	-0.71113	0.99198	0.05367	0.36841	0.9998	-0.05754
ENST00000187879	0.41638	0.86681	0.95656	-0.15391	0.44802	0.99914	0.09687	-0.25069	0.99997	0.27177	-0.00585	1	-0.20957	-0.62035	0.99482	-0.47299	-0.69062	0.99133	-0.77581	-1.00406	0.94637	0.25078	-0.66596	0.99241	0.42568	-0.44331	0.99916	-0.05566	-1.06214	0.92889	-0.31908	-1.13077	0.90949	-0.6219	-1.45385	0.76673	0.1749	0.23989	0.99998	-0.30645	-0.32829	0.99985	-0.56986	-0.39417	0.9996	-0.87268	-0.68113	0.99187	-0.48135
ENST00000188312	0.92457	0.48059	0.7775	-0.39645	-0.97859	0.9578	-0.47687	-1.39116	0.80572	-0.3119	-0.53371	0.99829	-0.39064	-0.73495	0.99012	-0.5921	-2.05006	0.38796	-0.225	-0.42203	0.99955	-0.08042	-0.47448	0.99913	0.08455	0.43094	0.9995	0.00581	0.21421	0.99999	-0.19565	-1.10445	0.92602	0.17145	0.52746	0.99841	0.16498	0.87191	0.97616	0.08623	0.66212	0.99438	-0.11522	-0.57409	0.99745	0.25187	0.95733	0.96216	-0.07875
ENST00000188376	0.61407	0.7186	0.89823	0.25837	0.19166	1	0.44113	0.57665	0.99739	0.00306	0.26315	0.99997	0.64427	1.14638	0.91248	0.69435	1.555	0.71098	0.53983	0.83503	0.98098	0.18277	0.38793	0.99973	-0.25531	0.06623	1	0.38591	0.93615	0.96598	0.43598	1.32974	0.83701	0.28147	0.63158	0.99568	-0.43807	-0.3299	0.99989	0.20314	0.5079	0.99871	0.25322	0.87218	0.97616	0.0987	0.21548	0.99999	0.64121
ENST00000188790	1.01403	0.4203	0.73796	0.04005	0.11582	1	0.17794	0.33675	0.99987	-0.07044	-0.08038	1	-0.16223	-0.37574	0.99976	-0.35854	-1.09801	0.92641	0.48552	1.38797	0.80557	0.13789	0.22609	0.99999	-0.11049	-0.19264	1	-0.20228	-0.48338	0.99897	-0.39859	-1.19594	0.89293	0.44546	1.26325	0.86496	-0.24838	-0.4044	0.99963	-0.34017	-0.67507	0.99343	-0.53648	-1.33958	0.8304	0.30757	0.97229	0.95757	-0.09179
ENST00000189444	0.21608	0.97106	0.99285	-0.44126	-0.78357	0.98434	-0.74847	-0.81086	0.98166	-0.32455	-0.71336	0.99031	-0.36698	-0.65597	0.99372	-0.13223	-0.35304	0.99981	-1.44058	-1.06597	0.93317	-0.30722	-0.0624	1	0.11671	0.05418	1	0.07428	0.10468	1	0.30903	0.39239	0.99965	-0.99932	-0.26934	0.99996	0.42393	0.11291	1	0.38149	0.1607	1	0.61625	0.43501	0.99939	-0.6921	-0.19308	1	-0.04243
ENST00000190165	3.10558	0.00773	0.08209	1.26891	3.30824	0.03703	1.16784	2.60002	0.16339	0.72608	1.61613	0.67317	1.578	3.95233	0.01119	0.89751	1.99873	0.43361	0.58523	1.85065	0.52339	-0.10107	-0.46036	0.99911	-0.54283	-1.63614	0.6617	0.30908	0.75834	0.98601	-0.3714	-1.16788	0.89933	-0.68368	-1.38274	0.80586	-0.44176	-1.07006	0.93116	0.41016	1.15893	0.90031	-0.27033	-0.64729	0.99434	-0.58261	-0.83881	0.9784	0.85192
ENST00000190611	1.60896	0.15151	0.47235	1.63067	1.7825	0.56279	1.32323	1.25082	0.87252	2.11218	2.62812	0.1319	1.00531	1.62292	0.66785	0.28923	0.70746	0.99205	0.08689	0.46191	0.99926	-0.30744	-0.41067	0.99961	0.48151	0.85878	0.97713	-0.62537	-0.17507	1	-1.34144	-1.08496	0.93121	-1.54378	-1.31255	0.84467	0.78896	1.22475	0.88201	-0.31792	0.24753	0.99998	-1.034	-0.60625	0.99652	-1.23633	-0.82186	0.98229	-1.10688
ENST00000190983	2.37836	0.03402	0.21283	0.1456	0.95436	0.96331	0.32588	1.79142	0.55428	-0.16119	-0.16992	1	0.21849	1.21334	0.88903	0.27928	1.36682	0.81937	0.85828	3.08083	0.03492	0.18029	0.8882	0.9743	-0.30678	-1.10781	0.92578	0.0729	0.28661	0.99995	0.13368	0.43849	0.99946	0.71269	2.16952	0.31382	-0.48707	-1.92744	0.46265	-0.10739	-0.59381	0.99699	-0.04661	-0.44943	0.99938	0.5324	1.21791	0.88716	0.37968
ENST00000191018	0.81524	0.56043	0.82166	2.0718	2.20578	0.3418	0.87161	1.12058	0.91686	0.20506	0.62285	0.99564	0.73055	0.78927	0.98433	0.23245	0.2249	0.99999	0.677	0.79543	0.98398	-1.20019	-0.97325	0.95294	-1.86674	-1.59446	0.68746	-1.34124	-1.37197	0.80799	-1.83935	-1.91051	0.49905	-1.3948	-1.3544	0.81732	-0.66655	-0.5402	0.99794	-0.14105	-0.35108	0.99982	-0.63916	-0.87176	0.97423	-0.19461	-0.34094	0.99985	0.5255
ENST00000191063	0.75435	0.60716	0.84581	-0.29112	-0.0492	1	0.15259	0.8616	0.96998	0.07981	1.12986	0.90307	0.44109	2.15151	0.4142	-0.19061	0.31213	0.99988	0.20948	1.44325	0.76895	0.44371	0.90862	0.96191	0.37093	1.17966	0.88578	0.73221	2.20602	0.38914	0.10051	0.35903	0.99974	0.50059	1.49128	0.74439	-0.07278	0.20282	0.99999	0.2885	1.10479	0.90776	-0.3432	-0.52914	0.99758	0.05688	0.53564	0.99728	0.36128
ENST00000192788	0.47869	0.82286	0.94047	0.02976	0.03863	1	0.06068	0.3395	0.99988	0.02914	0.13528	1	-0.00266	-0.48493	0.99904	-0.05541	-0.43623	0.99948	-0.12362	-1.1451	0.9139	0.03092	0.30125	0.99994	-0.00062	0.09605	1	-0.03242	-0.51705	0.99862	-0.08517	-0.46883	0.99921	-0.15338	-1.17463	0.90364	-0.03153	-0.20683	0.99999	-0.06334	-0.77528	0.98725	-0.11609	-0.73044	0.9907	-0.1843	-1.39053	0.80701	-0.0318
ENST00000193322	1.73925	0.11919	0.41964	-0.15061	-0.94798	0.96431	0.00044	-0.09396	1	-0.26215	-1.97074	0.43524	-0.01423	-0.13688	1	-0.12576	-0.99343	0.95523	0.24849	1.05069	0.94157	0.15105	0.78208	0.98655	-0.11154	-1.0261	0.94777	0.13637	0.77078	0.98753	0.02485	-0.07849	1	0.3991	1.94973	0.44904	-0.26259	-1.72358	0.60069	-0.01467	-0.03663	1	-0.1262	-0.83019	0.98168	0.24805	1.06954	0.93652	0.24792
ENST00000193403	1.74475	0.11758	0.41667	0.17511	1.02794	0.94647	0.59699	1.68053	0.63057	0.29571	1.17171	0.90316	1.05574	2.75332	0.10021	0.77746	2.08098	0.37245	0.72393	2.16649	0.32324	0.42189	0.73794	0.98977	0.1206	0.16625	1	0.88064	1.7851	0.5626	0.60236	1.10881	0.92379	0.54882	1.18507	0.89803	-0.30129	-0.56997	0.99748	0.45875	0.96498	0.95964	0.18047	0.32772	0.99989	0.12693	0.39072	0.99971	0.76003
ENST00000194118	0.53145	0.78349	0.92521	0.13207	0.40096	0.99966	-0.09188	-0.37425	0.99978	0.01903	-0.0903	1	0.198	0.67079	0.99391	-0.14824	-0.90807	0.97076	-0.0315	-0.45675	0.9993	-0.22395	-0.74252	0.98955	-0.11304	-0.47842	0.99907	0.06593	0.27766	0.99996	-0.28031	-1.27761	0.86093	-0.16357	-0.83441	0.98085	0.11091	0.28015	0.99996	0.28988	0.98688	0.95586	-0.05636	-0.4869	0.99899	0.06038	-0.06597	1	0.17896
ENST00000194152	0.6347	0.70218	0.89098	0.1865	1.12844	0.91715	0.21284	1.32986	0.83561	0.27615	1.25336	0.8703	0.07208	0.5804	0.99718	0.26719	1.50601	0.74035	0.28164	1.48314	0.7538	0.02634	0.27081	0.99997	0.08965	0.14168	1	-0.11442	-0.51532	0.99854	0.08069	0.41519	0.99958	0.09514	0.38739	0.99972	0.06331	-0.13352	1	-0.14076	-0.74978	0.9887	0.05435	0.12918	1	0.0688	0.10162	1	-0.20407
ENST00000194155	0.953	0.46089	0.76508	0.09566	0.59565	0.9966	0.08153	0.51961	0.99841	0.24545	1.40098	0.79802	0.3304	1.88789	0.50076	0.31555	1.72328	0.60501	0.30832	1.41816	0.789	-0.01413	-0.03831	1	0.14979	0.80902	0.98259	0.23474	1.30112	0.8468	0.21989	1.14642	0.90931	0.21266	0.84306	0.97863	0.16392	0.79843	0.98377	0.24887	1.26305	0.86394	0.23402	1.11745	0.91902	0.22679	0.83321	0.97989	0.08495
ENST00000194214	1.42955	0.21034	0.5519	0.16201	0.73943	0.98936	-0.22262	-1.12147	0.919	-0.01152	0.029	1	0.38341	1.58057	0.69495	-0.07793	-0.35365	0.99983	-0.1931	-0.63605	0.99531	-0.38463	-1.7952	0.55692	-0.17353	-0.69274	0.99245	0.2214	0.85005	0.97791	-0.23994	-1.05684	0.9378	-0.35511	-1.34028	0.83001	0.21111	1.1229	0.91844	0.60603	2.556	0.16205	0.14469	0.74739	0.98887	0.02952	0.49203	0.99888	0.39492
ENST00000194530	0.37092	0.89596	0.96739	-0.10253	-0.87209	0.97665	-0.05159	-0.61397	0.99639	-0.19172	-1.32611	0.8398	-0.11818	-0.70866	0.99211	-0.12807	-1.12321	0.92112	-0.08389	-1.00154	0.95376	0.05094	0.1989	0.99999	-0.08919	-0.45577	0.99933	-0.01566	0.13644	1	-0.02554	-0.27634	0.99996	0.01864	-0.1557	1	-0.14013	-0.62346	0.99607	-0.06659	-0.06564	1	-0.07648	-0.45216	0.99936	-0.0323	-0.33965	0.99988	0.07354
ENST00000194900	0.39828	0.87892	0.96091	0.12757	0.22177	0.99998	-0.30653	-1.18274	0.88282	-0.01785	-0.09649	1	-0.41184	-0.6397	0.99275	0.33757	0.64357	0.99225	0.27059	0.28636	0.99992	-0.4341	-1.40917	0.78406	-0.14543	-0.31706	0.99984	-0.53941	-0.87159	0.96627	0.21	0.44437	0.9989	0.14302	0.08228	1	0.28867	1.07728	0.91851	-0.10531	0.57164	0.9961	0.6441	1.72727	0.62065	0.57711	1.40327	0.78733	-0.39398
ENST00000196061	2.54168	0.02457	0.17551	-0.01802	-0.21225	0.99999	-0.03199	-0.29855	0.99994	0.17132	2.98762	0.04508	0.01717	0.49175	0.99896	0.1003	1.40246	0.80071	0.00817	0.45208	0.99936	-0.01396	-0.09923	1	0.18935	3.15296	0.0274	0.03519	0.68924	0.99321	0.11833	1.58869	0.6897	0.0262	0.65254	0.99496	0.20331	3.06265	0.03611	0.04915	0.74457	0.98973	0.13229	1.59012	0.68878	0.04016	0.71006	0.99203	-0.15416
ENST00000196169	0.44285	0.84863	0.9503	1.14158	1.3606	0.81829	0.13414	-0.10067	1	0.23834	0.4802	0.999	0.16371	-0.08735	1	0.79137	0.48065	0.99898	0.25042	0.31464	0.99991	-1.00745	-1.35836	0.8194	-0.90325	-0.86491	0.9753	-0.97787	-1.38038	0.80787	-0.35021	-0.79382	0.98385	-0.89116	-0.99491	0.95175	0.1042	0.54036	0.99805	0.02958	0.01531	1	0.65724	0.53915	0.99805	0.11629	0.38733	0.99971	-0.07462
ENST00000196371	2.34031	0.037	0.22324	0.27707	1.42994	0.78544	-0.02224	0.55633	0.99791	0.67186	3.11986	0.0315	0.32725	1.59112	0.68815	0.48726	2.40394	0.1989	0.40329	2.25374	0.26876	-0.29931	-0.78768	0.98611	0.39479	1.72275	0.60115	0.05017	0.21346	0.99999	0.21019	1.0263	0.94782	0.12622	0.85846	0.97834	0.6941	2.40264	0.19983	0.34949	0.96367	0.96144	0.5095	1.73337	0.59386	0.42553	1.5835	0.69303	-0.34461
ENST00000196482	0.29431	0.93851	0.98236	-0.58717	0.28044	0.99995	0.25688	0.86996	0.97228	-0.33544	-0.26543	0.99996	-0.24462	-0.3557	0.99979	0.41604	0.46586	0.99898	-0.12308	0.03044	1	0.84405	0.63002	0.99478	0.25172	-0.55207	0.99758	0.34254	-0.64033	0.99448	1.00321	0.21388	0.99999	0.46409	-0.23896	0.99998	-0.59233	-1.114	0.91548	-0.50151	-1.18729	0.88943	0.15915	-0.38729	0.99964	-0.37996	-0.81672	0.97989	0.09082
ENST00000196489	2.52397	0.02545	0.17941	0.21254	2.33929	0.23613	0.30703	3.28003	0.02361	0.24929	2.64762	0.12328	0.30014	3.07319	0.04301	0.18721	1.94437	0.45613	0.16923	1.80854	0.5453	0.09449	1.09419	0.92825	0.03675	0.34174	0.99987	0.0876	0.80704	0.98362	-0.02533	-0.30771	0.99993	-0.04331	-0.45149	0.99933	-0.05774	-0.75725	0.98828	-0.00689	-0.3044	0.99993	-0.11982	-1.34791	0.82736	-0.1378	-1.48901	0.75062	0.05085
ENST00000196551	1.60732	0.15078	0.47134	-0.88622	-1.27643	0.86223	0.57394	0.49576	0.99888	-0.65208	-1.50983	0.73878	0.02739	-0.46584	0.99922	1.12919	0.80373	0.98424	0.46177	0.60437	0.99662	1.46016	1.63436	0.66026	0.23414	-0.2824	0.99996	0.91361	0.72403	0.99101	2.01541	1.91512	0.47373	1.348	1.81168	0.54156	-1.22602	-1.83579	0.52562	-0.54655	-0.89603	0.97271	0.55525	0.29555	0.99994	-0.11217	0.07631	1	0.67947
ENST00000197268	0.2616	0.95347	0.98723	-0.02129	-0.2822	0.99996	-0.00052	-0.15737	1	0.02929	-0.08197	1	-0.04246	-0.38557	0.99972	-0.26482	-1.08156	0.93168	0.00966	-0.57094	0.99744	0.02077	0.10606	1	0.05059	0.19354	1	-0.02117	-0.11107	1	-0.24353	-0.80256	0.98403	0.03096	-0.29808	0.99994	0.02981	0.07744	1	-0.04194	-0.20752	0.99999	-0.2643	-0.85571	0.97786	0.01018	-0.38288	0.99974	-0.07175
ENST00000198536	4.36224	0.00058	0.01224	0.51991	1.95334	0.45832	-0.24116	-0.65554	0.99439	0.4851	1.61415	0.67421	1.1174	4.05127	0.0053	0.30435	0.68512	0.99283	-0.07293	8e-05	1	-0.76108	-2.49117	0.18703	-0.03481	-0.2958	0.99994	0.59748	2.17349	0.34044	-0.21557	-1.18257	0.89669	-0.59284	-1.8848	0.50066	0.72626	2.15595	0.3397	1.35856	4.46242	0.00155	0.54551	1.27136	0.86155	0.16824	0.63422	0.99533	0.63229
ENST00000198767	3.08652	0.0081	0.08451	0.11411	1.39316	0.80564	-0.07721	-0.5888	0.99714	0.14507	1.30063	0.85178	0.16349	1.16158	0.90826	-0.07994	-0.75476	0.98895	-0.20117	-1.9692	0.43493	-0.19133	-1.87876	0.49493	0.03096	-0.06352	1	0.04937	-0.17222	1	-0.19405	-2.08084	0.36477	-0.31528	-3.2993	0.01725	0.22228	1.78044	0.56164	0.2407	1.64591	0.65237	-0.00272	-0.13565	1	-0.12396	-1.26408	0.8682	0.01842
ENST00000198939	1.26377	0.28031	0.62491	-0.26305	-0.5863	0.99702	-0.66578	-0.69643	0.99244	-2.07017	-1.7266	0.60021	-1.44698	-1.48978	0.75008	0.76958	0.63116	0.99544	-0.93274	-0.56192	0.99768	-0.40273	-0.13971	1	-1.80712	-1.14095	0.91405	-1.18393	-0.91523	0.96941	1.03263	1.18791	0.89589	-0.66969	0.03237	1	-1.40438	-0.9267	0.96764	-0.7812	-0.72246	0.99097	1.43536	1.26823	0.86366	-0.26695	0.1723	1	0.62319
ENST00000199320	1.25058	0.28697	0.63198	-0.08588	-0.88121	0.97508	-0.08932	-0.60366	0.99666	0.01872	0.15609	1	0.11118	1.1899	0.89734	0.06315	0.5503	0.99801	-0.08414	-1.10342	0.92669	-0.00345	0.22098	0.99999	0.10459	1.00889	0.95159	0.19706	2.01409	0.40906	0.14903	1.3857	0.80907	0.00173	-0.24436	0.99998	0.10804	0.73325	0.99039	0.20051	1.68973	0.62369	0.15248	1.09302	0.92974	0.00518	-0.44587	0.9994	0.09247
ENST00000199389	2.15524	0.05341	0.27544	-0.05123	-0.69464	0.99292	-0.10659	-1.70608	0.61206	0.01682	0.27773	0.99996	-0.01824	-0.22152	0.99999	-0.14184	-2.17708	0.30853	-0.15361	-2.21252	0.28914	-0.05536	-1.04804	0.94263	0.06805	0.94952	0.96428	0.03299	0.44519	0.99941	-0.09061	-1.48962	0.75117	-0.10238	-1.52714	0.72846	0.12341	1.92268	0.46545	0.08835	1.43471	0.78292	-0.03525	-0.38271	0.99976	-0.04702	-0.41101	0.99963	-0.03506
ENST00000199448	0.99682	0.43156	0.74529	-0.19667	-0.77578	0.98725	0.09279	0.30948	0.99993	-0.3354	-1.46605	0.76506	-0.28329	-1.18803	0.89886	-0.398	-1.39649	0.80395	0.08563	-0.01364	1	0.28946	1.01942	0.94969	-0.13873	-0.6885	0.99326	-0.08662	-0.42876	0.99953	-0.20133	-0.63252	0.99575	0.28229	0.72482	0.99111	-0.42819	-1.64811	0.65086	-0.37608	-1.39381	0.80537	-0.49079	-1.58472	0.69225	-0.00717	-0.30957	0.99993	0.05211
ENST00000199706	1.79465	0.1057	0.39414	0.01192	0.31426	0.99992	0.13653	0.8069	0.98425	0.43805	3.01343	0.04318	0.07589	0.78035	0.98676	0.09434	0.86079	0.97805	0.15263	0.69636	0.99278	0.12461	0.5097	0.99872	0.42613	2.68497	0.10462	0.06397	0.47209	0.99917	0.08242	0.55085	0.99802	0.14071	0.38881	0.99973	0.30152	2.02725	0.39896	-0.06064	-0.05275	1	-0.04219	0.01972	1	0.0161	-0.13097	1	-0.36216
ENST00000199814	1.27168	0.277	0.62214	-0.28084	-0.75433	0.98881	-0.6253	-1.85209	0.51428	-0.48484	-1.4613	0.76734	-0.73282	-2.39304	0.20624	-0.04365	-0.8359	0.9809	-0.17587	-0.87752	0.97558	-0.34446	-1.14601	0.91311	-0.20399	-0.7222	0.99114	-0.45198	-1.67072	0.63621	0.23719	-0.12351	1	0.10498	-0.15255	1	0.14046	0.44747	0.99939	-0.10752	-0.46047	0.99928	0.58165	0.96671	0.96064	0.44943	0.95936	0.9621	-0.24798
ENST00000199940	0.68945	0.65855	0.87063	0.19029	1.00014	0.94718	0.13065	0.52916	0.99799	0.91934	1.71192	0.62114	0.70588	1.2677	0.85377	0.98661	1.94145	0.49121	0.57301	0.99038	0.94886	-0.05964	-0.4036	0.99955	0.72905	0.73895	0.98675	0.51559	0.30066	0.99991	0.79632	1.0024	0.94368	0.38272	0.04971	1	0.78869	1.08593	0.92125	0.57523	0.67323	0.99186	0.85596	1.32208	0.83022	0.44236	0.4303	0.99934	-0.21346
ENST00000200135	0.52893	0.78542	0.926	-0.00258	0.3009	0.99994	0.04873	0.54637	0.99809	0.01155	0.05603	1	-0.10244	-0.62435	0.99599	0.14323	0.66057	0.99454	-0.11847	-0.69659	0.99273	0.05131	0.26216	0.99997	0.01414	-0.23747	0.99998	-0.09985	-0.9074	0.97117	0.14581	0.36814	0.9998	-0.11589	-0.98108	0.95779	-0.03718	-0.48153	0.99906	-0.15117	-1.10885	0.92503	0.0945	0.09389	1	-0.1672	-1.17927	0.90154	-0.11399
ENST00000200181	1.38547	0.22583	0.56888	0.77852	1.46568	0.76398	1.573	2.26355	0.27883	0.03478	0.18093	1	1.03838	1.80103	0.55206	0.6429	1.14478	0.91223	0.75209	1.31121	0.84502	0.79447	0.93305	0.96533	-0.74374	-1.26225	0.86682	0.25986	0.38779	0.99971	-0.13562	-0.25479	0.99998	-0.02644	-0.10433	1	-1.53822	-2.07312	0.3818	-0.53462	-0.55123	0.99782	-0.93009	-1.13702	0.91371	-0.82091	-1.00698	0.95028	1.0036
ENST00000200453	7.0538	0	0.00015	-0.39617	-4.87661	2e-05	-0.05022	-0.64465	0.99528	-0.17825	-1.97595	0.43046	-0.09645	-0.9864	0.957	-0.02444	-0.41064	0.99963	0.07384	1.00607	0.95272	0.34595	3.86194	0.00224	0.21792	2.80315	0.0755	0.29973	3.69652	0.00424	0.37173	4.23694	0.00048	0.47002	5.66823	0	-0.12803	-1.19611	0.89579	-0.04623	-0.29462	0.99995	0.02578	0.23679	0.99999	0.12406	1.56227	0.70655	0.08181
ENST00000200457	1.05815	0.39237	0.71874	0.25581	1.18767	0.89836	0.14586	1.00113	0.95345	0.26917	1.33183	0.83642	0.49015	2.08301	0.36658	0.35036	1.56222	0.7065	0.45333	2.03747	0.39365	-0.10996	-0.12199	1	0.01336	0.15728	1	0.23434	0.93245	0.96687	0.09455	0.40558	0.99965	0.19752	0.8757	0.97584	0.12332	0.27026	0.99997	0.34429	1.00823	0.95169	0.20451	0.50531	0.99877	0.30747	0.95434	0.963	0.22098
ENST00000200557	1.76418	0.11378	0.40926	1.03421	1.8362	0.54519	-0.37504	-0.89167	0.97083	0.39769	0.91371	0.96602	0.67943	1.54759	0.71445	0.04739	0.24258	0.99998	-0.3056	-0.69924	0.99155	-1.40925	-2.6083	0.1823	-0.63651	-0.89733	0.96705	-0.35478	-0.24749	0.99997	-0.98682	-1.53074	0.724	-1.3398	-2.45856	0.23323	0.77273	1.73022	0.60419	1.05447	2.31877	0.28905	0.42243	1.0854	0.92725	0.06944	0.20322	0.99999	0.28173
ENST00000200639	1.84894	0.09671	0.37645	0.00349	-0.04921	1	0.35238	2.41402	0.19733	0.1223	0.20908	0.99999	0.22324	1.11372	0.92345	0.20271	1.52016	0.73253	-0.06813	-0.22029	0.99999	0.34889	2.43612	0.1885	0.11881	0.25372	0.99998	0.21975	1.14813	0.91227	0.19922	1.55023	0.714	-0.07163	-0.17057	1	-0.23008	-2.15086	0.32689	-0.12914	-1.27881	0.86094	-0.14967	-0.91607	0.96973	-0.42051	-2.55007	0.14636	0.10094
ENST00000200652	2.08896	0.06084	0.29594	0.16817	0.9687	0.95857	-0.26803	-1.21232	0.88672	-0.03341	-0.14665	1	0.23957	1.0722	0.9333	-0.27129	-1.49995	0.74379	-0.21626	-1.2358	0.87744	-0.4362	-2.11293	0.35928	-0.20158	-1.09378	0.9272	0.0714	0.13105	1	-0.43946	-2.42012	0.20873	-0.38443	-2.16525	0.32959	0.23462	1.05163	0.9394	0.5076	2.17854	0.32425	-0.00326	-0.23743	0.99998	0.05177	0.01506	1	0.27298
ENST00000201647	0.62687	0.70848	0.89355	1.02639	2.08111	0.43463	0.83651	1.70871	0.62649	0.5751	0.95189	0.95476	0.41007	0.55836	0.99693	0.47536	0.80141	0.98051	0.71567	1.29718	0.84059	-0.18988	-0.18074	0.99999	-0.45129	-1.04146	0.92817	-0.61632	-1.43931	0.7696	-0.55104	-1.11804	0.90603	-0.31073	-0.61252	0.99427	-0.26141	-0.77434	0.98154	-0.42644	-1.13689	0.89972	-0.36115	-0.85358	0.97142	-0.12084	-0.39579	0.99949	-0.16503
ENST00000201979	11.0415	0	0	0.77795	6.51854	0	0.2133	2.33901	0.23154	0.66182	5.80143	0	0.70826	5.83779	0	0.47046	4.44683	0.00031	0.39543	3.81948	0.00344	-0.56465	-3.79783	0.00412	-0.11614	-0.66561	0.99417	-0.06969	-0.47049	0.99915	-0.30749	-1.90035	0.48405	-0.38252	-2.54106	0.15371	0.44852	3.13244	0.03381	0.49496	3.24312	0.02491	0.25716	1.90567	0.47971	0.18213	1.31056	0.84617	0.04645
ENST00000202017	4.72456	0.00028	0.0068	0.12107	1.73467	0.59301	-0.09684	-1.84184	0.52028	0.15611	2.22646	0.28327	0.16564	2.52086	0.15438	0.07897	1.44478	0.77708	0.00228	-0.4854	0.99903	-0.2179	-3.43011	0.0116	0.03505	0.5127	0.99867	0.04458	0.83901	0.98069	-0.04209	-0.23293	0.99999	-0.11878	-2.14326	0.32895	0.25295	3.84934	0.00256	0.26248	4.10748	0.00094	0.17581	3.1085	0.03236	0.09912	1.32199	0.84153	0.00953
ENST00000202028	0.58359	0.74285	0.90868	0.33737	0.96537	0.94524	0.29225	0.76504	0.98103	-0.63442	-1.15696	0.8918	-0.55388	-0.61628	0.99399	-0.26131	-0.638	0.99284	-0.42149	-0.27366	0.99994	-0.04512	-0.11643	1	-0.97179	-2.12848	0.42747	-0.89125	-1.56742	0.70518	-0.59868	-1.54865	0.71465	-0.75886	-1.16847	0.88635	-0.92668	-1.83958	0.56389	-0.84614	-1.32458	0.82256	-0.55357	-1.31405	0.82744	-0.71375	-0.97877	0.94428	0.08054
ENST00000202556	0.9311	0.47594	0.77421	0.17188	1.25381	0.87176	0.19143	0.77867	0.98674	-0.11781	-0.223	0.99999	0.19845	1.03459	0.94526	-0.15496	-0.55147	0.99798	-0.0275	-0.1021	1	0.01955	-0.37866	0.99976	-0.28969	-1.45126	0.77298	0.02657	-0.16408	1	-0.32684	-1.75537	0.5797	-0.19937	-1.3133	0.84511	-0.30924	-0.97071	0.95967	0.00702	0.21169	0.99999	-0.34639	-1.26023	0.86907	-0.21893	-0.85027	0.97914	0.31627
ENST00000202677	1.04129	0.40333	0.72617	0.159	0.66479	0.99442	0.08686	0.38295	0.99975	0.55793	1.45897	0.76912	0.57887	1.38965	0.80753	0.41396	1.50237	0.74354	-0.00288	-0.28419	0.99996	-0.07214	-0.23657	0.99999	0.39893	0.81124	0.98388	0.41987	0.7576	0.98873	0.25495	0.86164	0.97803	-0.16188	-0.9204	0.96939	0.47107	0.99391	0.9554	0.49201	0.94063	0.96589	0.3271	1.0397	0.94475	-0.08974	-0.63438	0.99568	0.02094
ENST00000202773	0.68906	0.65888	0.87074	0.13787	1.07629	0.93507	0.21516	1.42116	0.79048	-0.00355	0.14913	1	0.13819	1.13967	0.91577	0.25162	1.42811	0.78664	0.25346	0.96588	0.96118	0.07729	0.41671	0.9996	-0.14142	-0.90332	0.97211	0.00032	0.09753	1	0.11375	0.38779	0.99974	0.11559	-0.06397	1	-0.21871	-1.25554	0.8719	-0.07697	-0.31381	0.99992	0.03646	-0.03972	1	0.03831	-0.46246	0.99927	0.14174
ENST00000202816	2.28032	0.04149	0.23879	-0.0067	-0.54755	0.99809	-0.10712	-1.63114	0.66209	0.07399	0.49774	0.99889	0.06438	0.49028	0.99898	-0.10032	-1.52764	0.72814	-0.18233	-2.21858	0.28603	-0.10042	-1.1033	0.92721	0.08069	1.0196	0.94958	0.07107	1.00496	0.95294	-0.09362	-0.98126	0.95806	-0.17563	-1.6633	0.64079	0.18111	2.04689	0.38555	0.1715	2.01939	0.40282	0.0068	0.14883	1	-0.07521	-0.48596	0.99903	-0.00962
ENST00000202831	0.36631	0.89883	0.96846	0.15123	-0.4004	0.99948	-0.01768	-0.74528	0.98531	-0.25866	-1.15124	0.89748	0.18061	0.17912	1	-0.22318	-0.97117	0.95046	0.50113	0.02634	1	-0.16891	-0.37516	0.99963	-0.40989	-0.76142	0.9836	0.02938	0.5795	0.99571	-0.37441	-0.59322	0.99555	0.34991	0.40729	0.99941	-0.24098	-0.33913	0.9998	0.19829	0.90883	0.96078	-0.2055	-0.19558	0.99999	0.51881	0.74133	0.98537	0.43927
ENST00000202834	1.05015	0.39749	0.72212	-0.02445	0.41082	0.99963	0.11643	0.81216	0.98376	-0.08237	-0.0991	1	0.09506	0.72992	0.99073	0.37544	1.97808	0.42944	-0.00582	-0.13693	1	0.14088	0.42998	0.99952	-0.05792	-0.50062	0.99885	0.11951	0.33489	0.99989	0.39988	1.58237	0.69376	0.01863	-0.53202	0.99838	-0.1988	-0.88903	0.97421	-0.02137	-0.10202	1	0.259	1.07039	0.93661	-0.12225	-0.9134	0.97047	0.17743
ENST00000202917	1.97021	0.0767	0.33487	1.01969	2.69678	0.18817	-0.33949	-0.32919	0.99987	0.14615	1.20698	0.88228	0.58925	1.6953	0.63012	-0.20969	0.67147	0.99286	-0.19098	-0.59013	0.9964	-1.35918	-2.87608	0.138	-0.87354	-1.46655	0.75753	-0.43043	-0.93984	0.95544	-1.22937	-1.95658	0.48506	-1.21066	-3.16506	0.08928	0.48564	1.46515	0.76079	0.92874	1.92449	0.49611	0.1298	0.95617	0.95838	0.14851	-0.24497	0.99998	0.4431
ENST00000202967	1.56127	0.1659	0.49329	0.09352	0.31587	0.99992	0.0697	0.00157	1	0.41224	2.28662	0.26017	0.18027	0.84835	0.97908	0.18489	1.13935	0.91459	0.00224	-0.46423	0.99923	-0.02381	-0.28836	0.99995	0.31872	1.94197	0.45808	0.08676	0.53501	0.99825	0.09138	0.82094	0.98234	-0.09127	-0.75805	0.98836	0.34254	2.10871	0.35553	0.11057	0.78185	0.98624	0.11519	1.04964	0.94107	-0.06746	-0.43007	0.9995	-0.23197
ENST00000203001	0.57589	0.74891	0.91125	-0.05011	-0.15259	1	0.1062	0.02715	1	0.683	0.47781	0.99908	0.60911	0.85751	0.9778	0.38607	0.5426	0.99812	1.11229	1.41811	0.7907	0.15631	0.1675	1	0.73312	0.61854	0.99608	0.65922	0.9958	0.95373	0.43618	0.68263	0.99333	1.1624	1.55042	0.71365	0.5768	0.41915	0.99956	0.50291	0.77449	0.98685	0.27987	0.47967	0.99906	1.00609	1.30597	0.84744	-0.07389
ENST00000203166	0.97385	0.44598	0.75464	-0.06248	0.14706	1	-0.13503	-0.34847	0.99985	0.23972	0.52621	0.9984	0.4077	0.90668	0.97044	1.00809	1.49729	0.74548	-0.33916	-0.65477	0.99468	-0.07255	-0.48018	0.99905	0.3022	0.37862	0.99976	0.47018	0.75853	0.98807	1.07056	1.34893	0.82621	-0.27669	-0.78778	0.98571	0.37475	0.82431	0.98182	0.54273	1.174	0.90177	1.14311	1.72176	0.60395	-0.20414	-0.26855	0.99997	0.16798
ENST00000203407	6.52573	1e-05	0.00035	0.37902	4.02521	0.00112	0.00612	0.12475	1	0.37715	4.14668	0.00067	0.22981	2.32744	0.23079	0.10124	0.73401	0.9905	0.02701	-0.01496	1	-0.37289	-3.61803	0.00552	-0.00187	0.1832	1	-0.14921	-1.55442	0.71151	-0.27778	-3.12422	0.02958	-0.35201	-3.88471	0.00198	0.37102	3.73464	0.00357	0.22369	2.04792	0.38432	0.09512	0.56254	0.99779	0.02088	-0.13432	1	-0.14734
ENST00000203556	0.7935	0.57701	0.83014	0.43538	1.36949	0.81503	0.04386	0.13688	1	0.17018	0.91587	0.96842	0.37139	1.10048	0.92496	-0.16256	-0.42926	0.99949	0.03275	0.28629	0.99995	-0.39152	-1.13986	0.91239	-0.2652	-0.43895	0.9994	-0.06399	-0.23493	0.99998	-0.59794	-1.74374	0.59058	-0.40263	-1.04086	0.94186	0.12632	0.718	0.99089	0.32753	0.89446	0.97171	-0.20642	-0.53128	0.99827	-0.01111	0.13416	1	0.20121
ENST00000203630	1.04993	0.39759	0.72223	-0.00452	0.07306	1	-0.08584	-0.80883	0.98415	0.10567	0.97096	0.96021	-0.10921	-0.72543	0.99107	0.01433	0.26795	0.99997	-0.14179	-1.20136	0.89387	-0.08132	-0.86946	0.97702	0.11019	0.88823	0.9744	-0.10469	-0.78774	0.98619	0.01884	0.19516	1	-0.13727	-1.26118	0.86954	0.19151	1.69152	0.62183	-0.02337	0.10538	1	0.10017	1.02724	0.94785	-0.05595	-0.33733	0.99988	-0.21488
ENST00000204005	1.31142	0.25827	0.60318	0.17807	0.36752	0.99979	-0.08796	-0.05163	1	-0.65066	-1.06582	0.93587	0.42638	0.96954	0.95801	-0.13853	0.03698	1	1.36364	1.5986	0.68394	-0.26603	-0.39826	0.99966	-0.82874	-1.42576	0.78591	0.24831	0.61032	0.99614	-0.31661	-0.3203	0.99991	1.18557	1.25659	0.86666	-0.5627	-0.94876	0.96299	0.51434	0.96906	0.95826	-0.05057	0.08517	1	1.4516	1.57468	0.69859	1.07704
ENST00000204517	0.82731	0.55137	0.8173	-0.34512	-1.38285	0.81014	0.2644	0.48451	0.99901	0.10187	-0.02789	1	-0.25066	-0.92322	0.9682	-0.01716	-0.38141	0.99975	0.23317	0.25351	0.99998	0.60951	1.7322	0.59596	0.44698	1.29424	0.85346	0.09446	0.40369	0.99965	0.32795	0.92976	0.96717	0.57828	1.54647	0.7162	-0.16253	-0.49306	0.9989	-0.51506	-1.3079	0.84695	-0.28156	-0.81213	0.98332	-0.03123	-0.22698	0.99999	-0.35252
ENST00000204549	1.04548	0.40038	0.72428	-0.11111	-1.23026	0.88231	0.03966	0.27796	0.99996	0.02312	0.58959	0.99711	-0.09507	-0.8008	0.98489	0.02144	0.40098	0.99968	0.04351	0.70385	0.99238	0.15077	1.41393	0.79437	0.13423	1.78168	0.56089	0.01604	0.38699	0.99974	0.13255	1.57495	0.69849	0.15462	1.88131	0.49334	-0.01654	0.275	0.99996	-0.13473	-1.01234	0.95121	-0.01823	0.1052	1	0.00384	0.38673	0.99974	-0.11819
ENST00000204566	0.56911	0.75424	0.91387	-0.68118	-1.15154	0.91084	-0.1727	-0.0418	1	-0.02602	-0.47438	0.99913	-0.01295	0.01413	1	0.08444	-0.07074	1	0.38461	0.5968	0.99681	0.50848	1.03092	0.94616	0.65516	0.62708	0.99584	0.66823	1.11225	0.92347	0.76562	1.0059	0.95201	1.06579	1.67595	0.63313	0.14669	-0.40532	0.99965	0.15975	0.05352	1	0.25715	-0.02714	1	0.55731	0.60407	0.99659	0.01307
ENST00000204604	1.88818	0.08954	0.36121	-0.54643	-0.70112	0.99176	0.06214	-0.19825	0.99999	-1.04652	-1.29844	0.8492	-1.05307	-0.8351	0.97978	1.07612	1.55854	0.70824	0.73996	1.16422	0.90151	0.60857	0.44857	0.9993	-0.50009	-0.58724	0.99694	-0.50663	-0.1289	1	1.62255	2.20533	0.32744	1.28639	1.82187	0.54447	-1.10865	-0.99098	0.95339	-1.1152	-0.5693	0.99736	1.01399	1.64722	0.65479	0.67783	1.27975	0.85533	-0.00655
ENST00000204679	2.5932	0.0222	0.16456	-0.15141	-1.39549	0.80429	-0.05742	-0.11316	1	-0.15006	-1.24515	0.87612	-0.00449	-0.02164	1	0.15863	1.52389	0.73039	0.12232	1.53099	0.72603	0.09399	1.18428	0.90003	0.00135	0.13189	1	0.14691	1.31176	0.84643	0.31003	2.84002	0.06935	0.27373	2.8596	0.06572	-0.09265	-1.04599	0.94302	0.05292	0.08858	1	0.21604	1.53404	0.72415	0.17974	1.543	0.71859	0.14557
ENST00000204726	1.30387	0.26122	0.60624	0.94741	-0.00503	1	0.29208	-0.80037	0.9848	2.31013	0.61122	0.99631	-0.63887	-1.72557	0.59929	2.14872	0.58075	0.99723	1.20229	0.58034	0.9973	-0.65533	-0.72017	0.99122	1.36272	0.5718	0.99743	-1.58628	-1.51691	0.73442	1.20131	0.54481	0.99805	0.25488	0.53592	0.99825	2.01805	1.20362	0.89114	-0.93095	-0.71931	0.99135	1.85664	1.16557	0.90536	0.91021	1.21795	0.88637	-2.949
ENST00000204961	9.11789	0	1e-05	0.44555	5.25057	0	0.18108	2.46688	0.17335	0.4302	5.23208	0	0.42236	4.87607	3e-05	0.1671	2.37717	0.20993	0.06323	0.9353	0.96676	-0.26447	-2.45273	0.17919	-0.01535	0.05239	1	-0.02319	-0.19423	1	-0.27845	-2.71182	0.09728	-0.38231	-4.15237	0.00075	0.24912	2.46974	0.17264	0.24128	2.19615	0.29949	-0.01398	-0.16941	1	-0.11785	-1.52024	0.73262	-0.00784
ENST00000205061	2.20478	0.04825	0.26011	-0.51582	-1.81018	0.54122	0.528	0.76197	0.98839	-0.59437	-2.25461	0.26691	-0.35543	-1.27843	0.86194	-0.30766	-0.9843	0.95747	0.04645	0.11659	1	1.04382	2.37463	0.20997	-0.07855	-0.47009	0.9992	0.16039	0.47711	0.99913	0.20817	0.76429	0.98821	0.56227	1.85426	0.51126	-1.12237	-2.76146	0.0843	-0.88342	-1.89224	0.48573	-0.83565	-1.62751	0.66446	-0.48154	-0.6333	0.99572	0.23894
ENST00000205194	0.52134	0.79099	0.92835	0.4271	1.13275	0.91512	0.31569	0.82069	0.98183	0.09013	0.21873	0.99999	-0.12068	-0.45331	0.99929	-0.02104	0.16285	1	0.15079	0.54749	0.99796	-0.11141	-0.23594	0.99998	-0.33697	-0.88543	0.9732	-0.54779	-1.53334	0.72374	-0.44814	-0.93006	0.96606	-0.27631	-0.54683	0.99794	-0.22556	-0.59832	0.99661	-0.43638	-1.20901	0.88767	-0.33673	-0.64255	0.99503	-0.1649	-0.28436	0.99995	-0.21081
ENST00000205214	0.62969	0.70624	0.89257	-0.8046	-1.15392	0.9088	-0.29637	-0.36026	0.99981	-0.50476	-1.04982	0.9403	0.03817	-0.17268	1	-0.36938	-0.59424	0.9968	0.68539	0.52512	0.99836	0.50824	0.71779	0.99114	0.29985	0.07905	1	0.84277	0.92421	0.96731	0.43522	0.50392	0.99874	1.49	1.5851	0.69212	-0.20839	-0.62995	0.99561	0.33453	0.18234	1	-0.07302	-0.21389	0.99999	0.98176	0.83399	0.98025	0.54292
ENST00000205402	3.24133	0.00579	0.06695	0.10049	0.54706	0.99811	-0.00696	-0.0593	1	0.24468	2.02858	0.39654	0.1072	0.56821	0.99766	-0.07842	-0.95988	0.96239	-0.20688	-2.15189	0.32233	-0.10745	-0.56768	0.99767	0.14419	1.471	0.76219	0.00671	0.03821	1	-0.17891	-1.47163	0.76183	-0.30738	-2.6519	0.11101	0.25164	1.95138	0.44624	0.11416	0.58781	0.99717	-0.07146	-0.83763	0.98102	-0.19993	-1.94633	0.44953	-0.13748
ENST00000205557	5.13279	0.00012	0.00354	0.90011	4.05798	0.0017	0.62621	3.34967	0.01804	0.71056	2.68251	0.11155	0.51286	1.99682	0.42182	0.18244	0.68251	0.99342	0.14636	0.06281	1	-0.2739	-0.44198	0.99941	-0.18955	-1.24802	0.87319	-0.38725	-1.91296	0.47701	-0.71768	-3.24274	0.02511	-0.75376	-3.8537	0.00345	0.08435	-0.74829	0.98905	-0.11335	-1.37657	0.81296	-0.44377	-2.61939	0.12893	-0.47985	-3.1953	0.02844	-0.1977
ENST00000205636	1.70981	0.12602	0.43203	0.20473	1.62954	0.66336	0.07715	0.72398	0.99103	0.15143	1.15697	0.9093	0.35041	2.33201	0.23415	0.22371	1.83137	0.52816	-0.01293	-0.16777	1	-0.12758	-0.79759	0.98502	-0.0533	-0.4426	0.99942	0.14568	0.76312	0.98806	0.01898	0.24926	0.99998	-0.21766	-1.73549	0.59289	0.07428	0.36854	0.9998	0.27326	1.49043	0.75027	0.14656	1.01123	0.95108	-0.09008	-0.85534	0.97859	0.19898
ENST00000206020	1.0176	0.41808	0.73612	0.24989	1.89913	0.48095	0.15891	1.07438	0.93565	0.17369	1.26733	0.86688	0.2676	1.9961	0.41726	0.24058	1.70258	0.61436	0.15628	0.76595	0.98808	-0.09098	-0.6886	0.99325	-0.0762	-0.59425	0.99699	0.01771	0.15942	1	-0.00931	-0.13123	1	-0.09361	-1.05773	0.94016	0.01478	0.12093	1	0.10869	0.8183	0.98316	0.08167	0.54458	0.99815	-0.00262	-0.32341	0.99991	0.09391
ENST00000206249	2.08573	0.06052	0.29515	0.78179	2.05309	0.4267	1.114	1.40098	0.79141	1.73045	2.73365	0.19375	-0.4062	-0.78524	0.98381	0.97488	1.09178	0.91969	1.10116	1.4026	0.79152	0.33221	-0.48737	0.99848	0.94866	0.64339	0.99266	-1.18799	-2.81123	0.13731	0.19309	-0.8283	0.97633	0.31937	-0.5248	0.99779	0.61645	1.08491	0.91537	-1.52021	-2.10352	0.40832	-0.13912	-0.30763	0.99989	-0.01285	-0.02569	1	-2.13665
ENST00000206380	1.38893	0.22568	0.5687	-0.74312	-1.56273	0.70619	-1.15619	-2.47407	0.17193	-0.41855	-1.18237	0.90036	-0.77573	-1.64	0.65645	-1.02449	-2.43158	0.18858	-0.82329	-1.77582	0.56536	-0.41307	-0.98832	0.95642	0.32457	0.33751	0.99988	-0.0326	-0.12644	1	-0.28136	-0.92367	0.96868	-0.08016	-0.25308	0.99998	0.73764	1.27898	0.86133	0.38046	0.83439	0.98125	0.1317	0.07716	1	0.3329	0.72174	0.99125	-0.35718
ENST00000206423	1.25485	0.28483	0.62975	-0.14997	-0.33131	0.99989	-0.05536	0.12606	1	0.20166	1.28725	0.85797	0.24705	1.23584	0.88014	0.20231	1.34092	0.83255	0.29969	1.65952	0.64329	0.09461	0.43398	0.99949	0.35162	1.59711	0.68428	0.39701	1.5414	0.71963	0.35228	1.64709	0.65155	0.44966	1.96662	0.43648	0.25702	1.08084	0.9338	0.3024	1.0401	0.94464	0.25767	1.13708	0.91664	0.35505	1.43936	0.78033	0.04539
ENST00000206451	1.02985	0.40932	0.73036	0.09692	0.52467	0.99847	-0.34365	-0.71665	0.99151	-0.40217	-0.81639	0.98315	0.29403	1.21175	0.88891	-0.33131	-0.63724	0.99551	0.02367	0.09772	1	-0.44057	-1.20692	0.89103	-0.49909	-1.32703	0.83871	0.19711	0.70254	0.99231	-0.42823	-1.14307	0.91407	-0.07324	-0.40706	0.99964	-0.05852	-0.0615	1	0.63768	1.83643	0.52508	0.01234	0.09733	1	0.36733	0.78209	0.98652	0.6962
ENST00000206474	1.40328	0.2188	0.56165	1.47802	2.485	0.24195	-0.00379	0.33975	0.99985	-0.011	0.2801	0.99995	1.192	2.16987	0.36702	0.12468	0.33584	0.99986	0.6061	1.00583	0.94735	-1.48181	-2.00281	0.45542	-1.48903	-2.17726	0.36889	-0.28602	-0.25261	0.99996	-1.35334	-2.05294	0.42936	-0.87192	-1.35201	0.81585	-0.00722	-0.07307	1	1.19579	1.71706	0.61607	0.12847	-0.01043	1	0.60989	0.62849	0.99506	1.203
ENST00000206542	4.113	0.00097	0.01824	0.1373	1.32554	0.83928	-0.16898	-1.22457	0.88403	0.16141	1.31377	0.84489	0.22689	2.08209	0.3678	-0.19172	-1.87884	0.49634	-0.08035	-0.66288	0.99442	-0.30628	-2.45575	0.18112	0.02411	0.01103	1	0.08959	0.79579	0.98512	-0.32903	-3.13617	0.03147	-0.21765	-1.94191	0.45496	0.33039	2.42058	0.19525	0.39587	3.13104	0.0325	-0.02274	-0.574	0.99748	0.08863	0.56569	0.99767	0.06548
ENST00000206595	0.75454	0.60702	0.84568	-0.371	-0.90942	0.96989	-0.09983	-0.32293	0.9999	-0.11531	-0.28868	0.99995	-0.36652	-1.09695	0.92685	0.27469	0.61874	0.99596	-0.36947	-1.13172	0.91629	0.27116	0.52112	0.99846	0.25569	0.60022	0.99661	0.00448	-0.21767	0.99999	0.64569	1.4789	0.75609	0.00153	-0.24976	0.99998	-0.01547	0.04758	1	-0.26668	-0.70821	0.99166	0.37453	0.88754	0.97318	-0.26964	-0.73977	0.98956	-0.25121
ENST00000206765	1.32788	0.2499	0.59513	0.62005	1.30422	0.83839	0.07744	0.0615	1	-0.60017	-1.12104	0.91419	0.21094	0.55868	0.9971	0.60867	0.92811	0.96139	-0.53844	-0.94433	0.96053	-0.54261	-1.15162	0.89991	-1.22022	-2.41899	0.25886	-0.40912	-0.7108	0.98892	-0.01138	-0.30549	0.9999	-1.15849	-2.21951	0.34083	-0.67761	-1.09939	0.92071	0.1335	0.46025	0.99901	0.53123	0.80814	0.98016	-0.61588	-0.93928	0.96119	0.8111
ENST00000207157	2.53117	0.02463	0.17582	-0.22378	-0.16	1	-0.42721	-0.62757	0.99357	-1.00272	-1.86663	0.54133	0.04008	0.01637	1	-1.48226	-3.60785	0.04747	-1.25957	-1.80216	0.57331	-0.20343	-0.47999	0.99849	-0.77894	-1.70502	0.62881	0.26386	0.18071	0.99999	-1.25848	-3.44031	0.0602	-1.03579	-1.6431	0.66182	-0.57552	-1.09497	0.91644	0.46728	0.6545	0.99157	-1.05505	-2.6837	0.18304	-0.83236	-1.05172	0.93041	1.0428
ENST00000207549	1.86655	0.0935	0.36961	0.29181	2.46471	0.17877	0.36505	2.47977	0.17323	0.14978	1.20145	0.89291	0.33177	2.36087	0.22239	0.05975	0.81847	0.98286	0.18936	1.74625	0.58585	0.07324	0.1871	1	-0.14202	-1.21363	0.88802	0.03996	-0.01118	1	-0.23205	-1.55816	0.709	-0.10245	-0.64608	0.99511	-0.21526	-1.31933	0.84202	-0.03328	-0.19174	1	-0.30529	-1.63923	0.65712	-0.17569	-0.78774	0.98589	0.18198
ENST00000207636	0.78105	0.58663	0.83544	-0.52724	-1.20513	0.89013	-0.24013	-0.22026	0.99999	0.28037	-0.02439	1	-0.49013	-0.81058	0.98317	-0.61772	-1.06179	0.93734	0.19764	0.55273	0.99785	0.28711	0.91541	0.96911	0.80761	1.13439	0.91518	0.03712	0.37119	0.99978	-0.09048	0.10981	1	0.72488	1.70396	0.61561	0.5205	0.18992	1	-0.24999	-0.54924	0.99795	-0.37759	-0.78837	0.98555	0.43777	0.73711	0.98973	-0.77049
ENST00000207870	0.49219	0.81297	0.9368	0.58645	1.15555	0.89876	0.37353	0.67172	0.99234	-0.22881	-0.52375	0.99811	-0.05147	-0.14913	1	0.08804	0.55897	0.99727	0.15568	0.11936	1	-0.21292	-0.40072	0.99952	-0.81526	-1.65041	0.65593	-0.63792	-1.26818	0.85369	-0.49841	-0.5554	0.99717	-0.43077	-0.97926	0.95012	-0.60234	-1.14068	0.90525	-0.425	-0.79013	0.9821	-0.28549	-0.13015	1	-0.21785	-0.53217	0.9978	0.17734
ENST00000209873	0.84002	0.54178	0.812	0.27664	1.04908	0.94071	0.23711	0.63113	0.99558	0.00227	0.44905	0.99935	0.24948	0.96017	0.96094	0.32949	0.81887	0.98241	-0.32655	-0.8197	0.98246	-0.03953	-0.34033	0.99987	-0.27438	-0.58723	0.99702	-0.02716	-0.06072	1	0.05285	-0.18518	1	-0.60319	-1.81453	0.54189	-0.23484	-0.20928	0.99999	0.01237	0.27599	0.99996	0.09238	0.15477	1	-0.56365	-1.36087	0.82082	0.24721
ENST00000209875	2.6393	0.02014	0.15466	0.08663	1.24888	0.87465	0.0672	0.88053	0.97544	-0.02777	-0.39858	0.99969	0.23407	3.22763	0.02196	0.09081	1.29214	0.85568	0.01726	0.51591	0.99864	-0.01943	-0.2835	0.99996	-0.11441	-1.60948	0.67627	0.14744	2.00382	0.41295	0.00417	0.08499	1	-0.06938	-0.69251	0.99302	-0.09497	-1.22896	0.88288	0.16687	2.16119	0.318	0.02361	0.35457	0.99984	-0.04994	-0.37299	0.99979	0.26185
ENST00000209884	0.42143	0.86333	0.95534	-0.03514	-0.30026	0.99994	0.02913	0.18621	1	-0.0907	-1.04787	0.94244	0.04292	0.44638	0.9994	-0.0304	-0.22885	0.99999	-0.00937	-0.28317	0.99996	0.06427	0.46308	0.99926	-0.05557	-0.74365	0.98972	0.07806	0.72873	0.99076	0.00473	0.06188	1	0.02576	0.00916	1	-0.11984	-1.15553	0.91012	0.01379	0.23761	0.99998	-0.05954	-0.39289	0.99971	-0.03851	-0.44408	0.99942	0.13363
ENST00000209929	1.99628	0.07289	0.32606	0.19181	1.74439	0.58616	0.32359	2.35145	0.22076	0.17199	1.39026	0.80718	-0.03436	-0.30001	0.99994	0.24945	2.02074	0.40198	0.2648	1.44483	0.77719	0.13178	0.73595	0.99033	-0.01982	-0.32204	0.99991	-0.22617	-1.9697	0.43475	0.05764	0.34389	0.99987	0.07299	-0.22787	0.99999	-0.1516	-1.0234	0.94866	-0.35795	-2.54582	0.14436	-0.07414	-0.3894	0.99973	-0.05879	-0.92529	0.96852	-0.20635
ENST00000210060	0.66416	0.6787	0.88058	-0.44914	-1.32414	0.83934	0.1329	0.47967	0.99906	-0.24974	-0.42224	0.99955	-0.02599	-0.10385	1	-0.08701	-0.078	1	0.06739	0.25837	0.99997	0.58204	1.69356	0.62183	0.19941	0.88565	0.97411	0.42315	1.16355	0.90607	0.36213	1.19082	0.89642	0.51653	1.52599	0.72871	-0.38264	-0.86358	0.97707	-0.15889	-0.55916	0.99775	-0.21991	-0.53539	0.99824	-0.06551	-0.22388	0.99999	0.22375
ENST00000210187	0.67939	0.66654	0.87492	0.5697	0.88509	0.96511	-0.81891	-1.27144	0.8531	-0.35838	-0.51613	0.99799	0.48043	0.51683	0.9977	0.11509	-0.35246	0.99976	-0.12962	-0.61206	0.99499	-1.38861	-2.14813	0.39779	-0.92808	-1.40286	0.78812	-0.08927	-0.36203	0.99965	-0.45462	-1.19898	0.87734	-0.69933	-1.46882	0.75557	0.46053	0.76233	0.98514	1.29934	1.7767	0.58906	0.93399	0.87355	0.97083	0.68928	0.63294	0.99436	0.83881
ENST00000210313	0.71135	0.64121	0.86244	0.00426	0.50761	0.99874	-0.1467	-0.93225	0.96714	-0.05257	-0.07589	1	0.06503	1.04911	0.94195	-0.04823	0.53667	0.99828	-0.01565	0.05973	1	-0.15095	-1.39808	0.80269	-0.05683	-0.57079	0.99756	0.06078	0.55411	0.99793	-0.05249	0.04212	1	-0.0199	-0.42954	0.99952	0.09413	0.84257	0.98024	0.21173	1.87555	0.4982	0.09847	1.40287	0.80015	0.13105	0.95574	0.96288	0.1176
ENST00000210444	3.8419	0.00168	0.02738	0.30218	2.46987	0.17648	0.13701	1.22656	0.8831	0.48577	4.12832	0.0011	0.35166	2.89725	0.06346	0.40382	3.37388	0.01542	0.21185	1.93629	0.45876	-0.16517	-1.07628	0.93427	0.18359	1.67148	0.63604	0.04948	0.51083	0.99867	0.10163	0.97302	0.95912	-0.09033	-0.46387	0.99924	0.34876	2.64199	0.12051	0.21465	1.52581	0.72893	0.2668	1.96505	0.44062	0.07484	0.6158	0.99625	-0.13411
ENST00000210633	1.20072	0.31116	0.65398	0.0087	-0.62565	0.99373	-0.00909	0.16951	1	0.52682	1.05103	0.92373	-0.67787	-1.64174	0.66367	0.36176	0.34079	0.99977	-0.58711	-1.58932	0.69166	-0.0178	0.75049	0.98423	0.51812	1.70764	0.63395	-0.68657	-1.033	0.93298	0.35305	0.94185	0.95332	-0.59581	-0.99833	0.9434	0.53591	0.79305	0.97803	-0.66878	-1.69281	0.63585	0.37085	0.15359	1	-0.57801	-1.65384	0.6562	-1.20469
ENST00000211287	1.1558	0.33459	0.67291	-0.16467	0.09543	1	0.13279	0.34556	0.99985	-0.52646	-1.02004	0.94672	0.52042	1.50174	0.74177	-0.15049	-0.09132	1	-0.38298	-0.68502	0.99285	0.29746	0.25785	0.99997	-0.36179	-1.1174	0.91951	0.68509	1.414	0.7905	0.01418	-0.18347	1	-0.21831	-0.77954	0.98589	-0.65926	-1.28814	0.8536	0.38763	1.07121	0.93209	-0.28329	-0.41932	0.99953	-0.51578	-0.975	0.95683	1.04688
ENST00000211314	1.38034	0.22992	0.57288	-0.05373	0.42269	0.99953	-0.01786	0.8178	0.98224	-0.25736	-0.56212	0.99764	0.05035	0.88822	0.97295	0.21964	2.01109	0.41858	0.08914	1.29657	0.85102	0.03587	0.42031	0.99954	-0.20363	-0.97749	0.95709	0.10408	0.47496	0.99907	0.27337	1.60024	0.68265	0.14286	0.88619	0.97336	-0.2395	-1.33444	0.83318	0.06821	0.03684	1	0.2375	1.10447	0.92434	0.10699	0.42808	0.99949	0.30771
ENST00000211379	1.15867	0.33301	0.67191	-0.33579	-0.88012	0.97547	0.27924	-0.40868	0.99964	-0.47929	-0.76921	0.98777	-0.85585	-1.85312	0.51234	-0.43719	-1.00478	0.95295	0.50405	0.64591	0.99521	0.61504	0.37728	0.99977	-0.1435	0.11464	1	-0.52006	-0.9744	0.95943	-0.10139	-0.14191	1	0.83984	1.45513	0.77122	-0.75854	-0.2766	0.99996	-1.13509	-1.23994	0.87831	-0.71643	-0.49787	0.99888	0.22481	0.97112	0.95999	-0.37656
ENST00000211936	0.27409	0.94798	0.98598	-0.10251	-0.45724	0.99927	-0.10513	-0.38114	0.99974	-0.17136	-0.33291	0.99988	-0.1942	-0.80618	0.98364	-0.0669	-0.08025	1	0.12453	0.39577	0.99968	-0.00262	0.04829	1	-0.06885	0.12096	1	-0.09169	-0.35669	0.99983	0.03561	0.35943	0.99982	0.22704	0.83034	0.981	-0.06623	0.06575	1	-0.08908	-0.38339	0.99974	0.03823	0.29226	0.99995	0.22966	0.73822	0.98969	-0.02285
ENST00000211998	0.84141	0.54099	0.81164	-0.01178	-0.03388	1	0.85184	1.88613	0.48968	0.28091	0.15565	1	0.2031	0.36165	0.99982	0.20267	0.53629	0.99831	-0.02062	-0.11263	1	0.86362	1.90016	0.48027	0.2927	0.18633	1	0.21489	0.39011	0.99973	0.21445	0.56298	0.99778	-0.00883	-0.07886	1	-0.57093	-1.68121	0.62876	-0.64873	-1.49096	0.7504	-0.64917	-1.33468	0.83567	-0.87245	-1.9308	0.45985	-0.07781
ENST00000212015	1.15409	0.3366	0.67433	-0.13822	-1.15869	0.909	-0.0261	-0.37045	0.9998	0.09013	0.26041	0.99997	-0.20309	-1.57278	0.69985	0.07449	0.48054	0.99908	0.09271	0.17879	1	0.11211	0.70627	0.99219	0.22834	1.38068	0.81194	-0.06487	-0.44657	0.9994	0.2127	1.5838	0.69284	0.23092	1.28818	0.8572	0.11623	0.60295	0.9967	-0.17698	-1.10472	0.92649	0.10059	0.80438	0.98446	0.11881	0.52416	0.9985	-0.29321
ENST00000212355	0.68601	0.66126	0.87193	0.33551	0.7731	0.98734	0.49997	1.02731	0.94739	0.00577	-0.06163	1	0.55069	0.42046	0.99957	1.05629	1.64597	0.65261	0.58058	0.63151	0.99573	0.16446	0.30857	0.99993	-0.32974	-0.8182	0.98299	0.21517	-0.30133	0.99994	0.72078	0.93122	0.96713	0.24507	-0.10105	1	-0.4942	-1.06582	0.93751	0.05072	-0.57525	0.99744	0.55632	0.591	0.99702	0.08061	-0.39054	0.99972	0.54491
ENST00000214869	1.01253	0.42136	0.7386	-0.15038	-2.09854	0.35394	-0.0489	-0.71895	0.99147	-0.07634	-1.25023	0.87415	-0.11488	-1.37716	0.8141	-0.02221	-0.29835	0.99994	-0.01365	-0.55228	0.998	0.10147	1.22981	0.8826	0.07403	0.80614	0.9844	0.0355	0.64997	0.99506	0.12817	1.71353	0.60703	0.13673	1.46686	0.76456	-0.02744	-0.45606	0.99933	-0.06598	-0.5864	0.9972	0.02669	0.41474	0.99961	0.03525	0.17944	1	-0.03854
ENST00000215057	0.76063	0.60236	0.84334	-1.24366	-1.45941	0.76696	0.02101	0.06664	1	-0.7181	-0.86153	0.97662	-0.97372	-1.24598	0.87255	-1.21176	-1.42075	0.78848	-0.41369	-0.4459	0.99935	1.26467	1.41226	0.79279	0.52557	0.58407	0.99709	0.26994	0.17285	1	0.0319	-0.01103	1	0.82997	0.96008	0.96067	-0.73911	-0.86418	0.97619	-0.99473	-1.21955	0.88319	-1.23277	-1.38023	0.8098	-0.4347	-0.48065	0.99899	-0.25562
ENST00000215061	0.77949	0.58786	0.83578	0.23771	0.87399	0.97342	0.22789	0.80103	0.98282	-0.08659	-0.1462	1	0.03189	-0.05148	1	0.4057	1.27093	0.85874	-0.2452	-0.58097	0.99696	-0.00982	-0.01539	1	-0.3243	-1.00199	0.94898	-0.20582	-0.8956	0.96975	0.16799	0.43292	0.99939	-0.48291	-1.41818	0.78776	-0.31448	-0.92266	0.96545	-0.196	-0.82479	0.9799	0.17782	0.42212	0.99947	-0.47309	-1.31515	0.83927	0.11848
ENST00000215071	1.43253	0.20765	0.54896	-0.0849	-0.55549	0.99793	-0.28229	-1.3116	0.84669	-0.0085	0.06797	1	0.00295	-0.00275	1	-0.10942	-0.41551	0.99961	0.46396	1.62321	0.6673	-0.19739	-0.77492	0.9873	0.07641	0.60896	0.99655	0.08786	0.52892	0.99843	-0.02452	0.12506	1	0.54886	2.1278	0.33691	0.27379	1.34571	0.83013	0.28524	1.25687	0.87129	0.17287	0.87688	0.97598	0.74625	2.77574	0.08149	0.01145
ENST00000215095	0.98874	0.43603	0.74776	0.44585	1.51178	0.73623	0.64922	1.56791	0.70271	0.02916	0.05799	1	0.24722	0.87199	0.97473	0.61589	1.74236	0.59287	0.13477	0.68162	0.99303	0.20337	0.16752	1	-0.41669	-1.42236	0.78653	-0.19863	-0.60191	0.99634	0.17004	0.29603	0.99994	-0.31108	-0.78129	0.98551	-0.62005	-1.48574	0.75119	-0.402	-0.72461	0.99006	-0.03333	0.11534	1	-0.51445	-0.89207	0.9716	0.21806
ENST00000215115	1.26766	0.27865	0.62348	0.20687	1.39323	0.80548	-0.00164	-0.17181	1	0.24425	1.73119	0.59528	0.17613	1.30645	0.84891	0.27963	1.9176	0.46932	0.15306	1.18071	0.90135	-0.20851	-1.46165	0.76745	0.03738	0.35197	0.99985	-0.03073	-0.04144	1	0.07277	0.55982	0.99783	-0.05381	-0.1741	1	0.24589	1.77297	0.56695	0.17778	1.38052	0.81217	0.28128	1.94924	0.44849	0.1547	1.26585	0.86728	-0.06812
ENST00000215375	0.73176	0.62508	0.85462	-0.10337	-0.1782	1	0.12599	0.50307	0.99882	0.4895	1.59739	0.6841	-0.15282	-0.10035	1	-0.02825	0.57931	0.99739	-0.11403	0.01831	1	0.22937	0.66339	0.99448	0.59287	1.75381	0.57975	-0.04944	0.07301	1	0.07513	0.74686	0.98955	-0.01066	0.19142	1	0.36351	1.00395	0.95316	-0.27881	-0.5821	0.99731	-0.15424	0.047	1	-0.24003	-0.47433	0.99916	-0.64232
ENST00000215555	0.44161	0.84942	0.95054	0.0474	0.2478	0.99998	0.04685	0.68423	0.99346	0.11378	1.06613	0.93781	-0.0348	-0.109	1	0.06493	0.65523	0.99484	-0.071	-0.22375	0.99999	-0.00055	0.44732	0.9994	0.06639	0.81079	0.98391	-0.0822	-0.34562	0.99986	0.01754	0.40981	0.99964	-0.11839	-0.46089	0.99928	0.06693	0.32378	0.99991	-0.08165	-0.76208	0.98836	0.01808	-0.04899	1	-0.11784	-0.87279	0.97652	-0.14859
ENST00000215565	0.58162	0.74424	0.90913	0.13522	1.31902	0.84327	0.04254	0.38939	0.99973	0.15884	1.36484	0.82056	0.04882	0.50077	0.99885	0.13371	1.03516	0.94594	0.04945	0.19214	1	-0.09268	-0.83366	0.98147	0.02362	0.06713	1	-0.0864	-0.76867	0.98786	-0.00151	-0.23487	0.99999	-0.08576	-1.07232	0.93624	0.1163	0.88219	0.97527	0.00628	0.08903	1	0.09117	0.58618	0.99721	0.00691	-0.19636	1	-0.11002
ENST00000215567	1.67003	0.13404	0.44371	0.04251	0.0499	1	-0.95212	-1.51372	0.73572	-0.4152	-0.5897	0.99689	-0.05279	0.06952	1	0.60067	1.0616	0.93599	0.65351	1.31174	0.84294	-0.99463	-1.54327	0.71788	-0.45771	-0.63199	0.99543	-0.09529	0.0203	1	0.55816	1.00363	0.95048	0.611	1.25108	0.86978	0.53692	0.94086	0.96457	0.89934	1.53454	0.72316	1.55279	2.44619	0.19929	1.60563	2.69574	0.11885	0.36242
ENST00000215570	1.31366	0.25775	0.60274	-0.00858	-0.2714	0.99997	-0.13693	-1.83644	0.52334	0.08873	0.873	0.97653	0.00544	-0.0257	1	-0.03759	-0.62921	0.99587	-0.0259	-0.85537	0.97885	-0.12835	-1.56791	0.70297	0.09731	1.12381	0.92093	0.01402	0.23379	0.99999	-0.02902	-0.36246	0.99982	-0.01732	-0.58841	0.99715	0.22566	2.59494	0.12789	0.14237	1.73948	0.58939	0.09933	1.17893	0.9022	0.11103	0.96984	0.96042	-0.08329
ENST00000215574	1.53931	0.17274	0.50338	0.04919	0.72666	0.99096	0.03451	0.32204	0.99991	0.22212	2.57026	0.13632	0.0174	0.42846	0.99953	0.10313	1.33272	0.83652	0.00272	0.11989	1	-0.01468	-0.35215	0.99985	0.17292	1.83683	0.52334	-0.0318	-0.27268	0.99997	0.05394	0.62457	0.99603	-0.04647	-0.58116	0.99734	0.18761	2.06779	0.37287	-0.01711	0.08682	1	0.06862	0.92707	0.96823	-0.03179	-0.20044	0.99999	-0.20472
ENST00000215587	0.74882	0.6116	0.84801	0.00149	0.12503	1	0.91786	1.26245	0.86429	0.2787	0.43222	0.99945	0.81585	0.87849	0.97355	0.98829	1.34995	0.82408	1.07649	1.52804	0.7266	0.91637	1.14358	0.90999	0.27721	0.30846	0.99992	0.81436	0.75655	0.98757	0.9868	1.22556	0.87983	1.07501	1.40448	0.7959	-0.63916	-0.8391	0.97888	-0.10201	-0.3969	0.99964	0.07043	0.04068	1	0.15863	0.21239	0.99999	0.53715
ENST00000215631	2.77257	0.01531	0.12982	0.28079	0.92587	0.96789	0.02521	0.03124	1	0.4034	1.94266	0.45572	0.77713	3.57934	0.00885	0.25114	1.12346	0.92012	0.24731	1.09921	0.92764	-0.25558	-0.82863	0.98162	0.12261	1.00361	0.95237	0.49633	2.6376	0.1253	-0.02965	0.21916	0.99999	-0.03348	0.1891	1	0.37819	1.77485	0.5671	0.75192	3.32366	0.0197	0.22594	1.01512	0.94994	0.2221	0.99477	0.95455	0.37372
ENST00000215659	1.08633	0.37554	0.70523	-0.23172	-1.47766	0.75827	0.00578	-0.11249	1	-0.20753	-1.48023	0.75676	-0.22327	-1.47551	0.75953	-0.01675	-0.10527	1	0.03518	-0.0266	1	0.2375	1.25273	0.87314	0.02419	-0.02489	1	0.00844	-0.04333	1	0.21497	1.30905	0.84795	0.2669	1.3888	0.80804	-0.21331	-1.25714	0.87126	-0.22905	-1.25895	0.87048	-0.02253	0.01057	1	0.0294	0.08373	1	-0.01574
ENST00000215730	1.93473	0.08204	0.34558	0.03688	0.54323	0.99818	-0.10715	-1.66005	0.64296	0.04384	0.46566	0.99924	0.02011	0.04503	1	-0.07819	-1.31082	0.84705	-0.08339	-1.72029	0.60247	-0.14403	-2.15028	0.32386	0.00695	-0.06882	1	-0.01677	-0.47556	0.99914	-0.11507	-1.81768	0.53624	-0.12028	-2.22802	0.2811	0.15099	2.05413	0.38107	0.12726	1.63837	0.65734	0.02896	0.37607	0.99978	0.02376	-0.00291	1	-0.02373
ENST00000215742	0.70847	0.64346	0.86356	-0.18283	-0.6924	0.99206	0.31011	0.91186	0.96732	-0.01554	-0.38626	0.99969	0.45745	0.97335	0.95459	0.13768	0.50191	0.99863	0.17654	0.41875	0.99951	0.49294	1.54728	0.71493	0.16729	0.28954	0.99994	0.64028	1.62692	0.66754	0.3205	1.16317	0.9023	0.35936	1.07776	0.92976	-0.32565	-1.2487	0.86819	0.14734	0.03304	1	-0.17243	-0.41271	0.99954	-0.13357	-0.48794	0.99881	0.47299
ENST00000215743	1.15668	0.33411	0.67252	0.85528	1.67946	0.64329	0.87029	1.6138	0.67922	1.23083	2.64959	0.22547	0.54507	1.49081	0.74471	1.01566	2.34619	0.31673	1.34506	2.84884	0.17535	0.01501	0.05165	1	0.37554	0.95824	0.948	-0.31021	-0.137	1	0.16038	0.76734	0.98171	0.48978	1.22013	0.86578	0.36053	0.83092	0.97259	-0.32522	-0.17746	1	0.14537	0.66245	0.99123	0.47477	1.08909	0.91237	-0.68575
ENST00000215754	5.43024	7e-05	0.00218	0.40479	3.9286	0.00172	0.27686	2.56058	0.13893	0.39873	3.43442	0.01086	0.5438	4.7841	4e-05	0.42599	4.43013	0.0002	0.2954	2.80752	0.07457	-0.12793	-1.09526	0.92963	-0.00605	-0.42137	0.99957	0.13901	0.9997	0.95412	0.0212	0.61809	0.99626	-0.10938	-0.99089	0.95605	0.12188	0.67983	0.99369	0.26694	2.00116	0.41432	0.14914	1.64726	0.65144	0.01855	0.13634	1	0.14506
ENST00000215770	1.55439	0.16821	0.49744	0.01071	-0.38374	0.99971	0.57066	-0.30632	0.99992	-0.10048	-0.91636	0.96745	-1.3639	-2.64894	0.13474	-0.6457	-1.0464	0.93997	-0.81087	-1.50588	0.73994	0.55995	0.03903	1	-0.11119	-0.53362	0.99812	-1.37461	-2.23025	0.29997	-0.65641	-0.6557	0.9943	-0.82158	-1.10945	0.92205	-0.67114	-0.51971	0.99833	-1.93455	-2.02372	0.41883	-1.21636	-0.62808	0.99537	-1.38153	-1.0343	0.9423	-1.26341
ENST00000215790	2.36122	0.03562	0.2182	0.39744	1.82851	0.53122	-0.02368	0.24863	0.99998	0.16125	1.00011	0.9533	0.78042	3.29746	0.02196	0.28091	1.44528	0.77627	0.52388	1.9043	0.48087	-0.42112	-1.46204	0.76662	-0.2362	-0.79334	0.98525	0.38298	1.54302	0.7182	-0.11653	-0.33333	0.99989	0.12644	0.15218	1	0.18493	0.69053	0.99296	0.8041	2.87282	0.07079	0.30459	1.11126	0.92389	0.54756	1.55514	0.71085	0.61917
ENST00000215793	3.63129	0.00259	0.03741	-0.2255	-2.52519	0.15096	0.0002	0.09503	1	-0.10801	-1.0166	0.95031	-0.3084	-3.37314	0.01344	-0.0396	-0.29361	0.99995	-0.03351	-0.13129	1	0.2257	2.43797	0.18354	0.11749	1.46214	0.76729	-0.08291	-0.91232	0.97069	0.1859	2.13177	0.33435	0.19199	2.30747	0.24089	-0.10821	-1.03916	0.94487	-0.30861	-3.23152	0.02143	-0.0398	-0.3658	0.99981	-0.03371	-0.21476	0.99999	-0.2004
ENST00000215794	5.58792	5e-05	0.00168	0.41174	3.12328	0.03752	-0.05831	-0.47277	0.99913	0.41094	3.15765	0.03409	0.44657	3.40727	0.01709	0.1648	1.20942	0.88901	-0.00702	-0.24042	0.99998	-0.47005	-3.35777	0.01925	-0.0008	0.07669	1	0.03483	0.37946	0.99975	-0.24694	-1.77813	0.56628	-0.41876	-3.22652	0.02788	0.46925	3.38196	0.01793	0.50488	3.62004	0.00893	0.22311	1.57033	0.70132	0.05129	0.23114	0.99999	0.03563
ENST00000215798	0.43423	0.8548	0.95243	0.85756	1.41865	0.78681	0.70405	0.84573	0.97739	0.83302	1.10131	0.92165	0.31097	0.2726	0.99996	-0.0403	0.40515	0.99961	0.28972	0.60598	0.99618	-0.15351	-0.46373	0.99907	-0.02454	-0.27936	0.99995	-0.54659	-1.09718	0.92218	-0.89786	-0.9841	0.95301	-0.56784	-0.7714	0.98566	0.12897	0.19328	0.99999	-0.39308	-0.56804	0.99717	-0.74435	-0.4564	0.99919	-0.41433	-0.26469	0.99997	-0.52205
ENST00000215829	3.0867	0.00807	0.08436	-0.10864	-1.53989	0.72058	0.10675	1.34992	0.8281	-0.11902	-1.40765	0.79792	-0.15206	-2.16386	0.31572	0.04826	0.59092	0.99708	0.02435	0.2675	0.99997	0.21539	2.76278	0.0838	-0.01039	0.11057	1	-0.04342	-0.66646	0.99435	0.1569	2.05619	0.37942	0.13299	1.74677	0.58441	-0.22577	-2.62272	0.1195	-0.25881	-3.30897	0.0165	-0.05849	-0.74947	0.98937	-0.0824	-1.05782	0.94012	-0.03304
ENST00000215832	3.69688	0.00228	0.03415	-0.17512	-2.46507	0.17259	-0.01653	-0.3461	0.99986	-0.27531	-3.95107	0.00155	-0.13053	-1.90341	0.47816	-0.07346	-0.84486	0.98014	-0.05749	-0.80732	0.9843	0.15859	1.94037	0.4536	-0.10019	-1.50176	0.74392	0.04459	0.47775	0.99912	0.10166	1.52333	0.73081	0.11763	1.56829	0.70274	-0.25878	-3.31661	0.01609	-0.114	-1.4367	0.78184	-0.05693	-0.4529	0.99935	-0.04096	-0.41822	0.99959	0.14478
ENST00000215838	1.47783	0.19275	0.53047	0.65412	1.73786	0.59221	0.24066	0.77743	0.98678	0.85809	2.56317	0.14757	0.53395	1.64477	0.65374	0.50118	1.27576	0.8619	0.82614	2.08765	0.36639	-0.41346	-0.8566	0.97806	0.20397	0.82841	0.98136	-0.12017	-0.04388	1	-0.15294	-0.40469	0.99965	0.17202	0.39864	0.99967	0.61743	1.64153	0.6559	0.29328	0.79421	0.98509	0.26052	0.44863	0.99936	0.58547	1.21558	0.88682	-0.32414
ENST00000215882	1.02325	0.41353	0.73316	0.92571	1.78127	0.56554	0.59481	1.09521	0.9275	0.01982	0.28942	0.99995	0.45291	1.06326	0.93652	0.45771	1.20781	0.88906	-0.1429	-0.18883	1	-0.3309	-0.57668	0.99723	-0.9059	-1.47848	0.7562	-0.4728	-0.67731	0.9933	-0.468	-0.52976	0.99828	-1.06861	-1.92334	0.47261	-0.575	-0.81756	0.98236	-0.1419	-0.07442	1	-0.1371	0.06376	1	-0.73771	-1.24526	0.87395	0.4331
ENST00000215904	2.58094	0.02261	0.16635	-0.12087	-0.91913	0.96941	-0.03663	-0.19194	1	0.15632	1.39286	0.80551	-0.15535	-1.03359	0.94599	-0.22937	-1.78245	0.56063	0.11557	1.17753	0.90234	0.08425	0.66076	0.99455	0.27719	2.26925	0.26189	-0.03448	-0.14232	1	-0.1085	-0.8819	0.97515	0.23645	2.05529	0.38158	0.19294	1.48254	0.75515	-0.11873	-0.77551	0.98716	-0.19274	-1.46792	0.76376	0.1522	1.28555	0.85838	-0.31167
ENST00000215909	2.40157	0.03266	0.20784	0.07516	0.64213	0.99539	0.13847	0.88042	0.97553	0.10597	0.86434	0.97771	0.06338	1.01242	0.95135	0.3155	2.64601	0.11258	0.32846	3.05077	0.03707	0.0633	0.2828	0.99996	0.03081	0.22851	0.99999	-0.01178	0.38326	0.99975	0.24034	2.00566	0.41101	0.2533	2.41312	0.19302	-0.03249	-0.06515	1	-0.07509	0.08197	1	0.17704	1.60378	0.67995	0.18999	1.98848	0.42204	-0.04259
ENST00000215912	2.00573	0.07123	0.32244	0.14652	0.38138	0.99976	0.3182	0.26113	0.99997	-0.46169	-1.76906	0.56963	0.08647	0.05871	1	0.24376	0.25521	0.99998	0.8228	1.749	0.58352	0.17168	-0.08809	1	-0.6082	-2.09537	0.35708	-0.06005	-0.30472	0.99993	0.09725	-0.10969	1	0.67628	1.36906	0.81789	-0.77989	-1.83576	0.52454	-0.23173	-0.19663	1	-0.07444	-0.01647	1	0.5046	1.36489	0.82002	0.54816
ENST00000215917	6.07622	2e-05	0.00073	-0.11719	-1.51307	0.73705	0.15132	1.57789	0.69662	-0.21449	-2.84991	0.06666	-0.18504	-2.15539	0.3209	0.13619	1.55264	0.7126	0.10055	0.79394	0.98558	0.26851	2.95648	0.04955	-0.0973	-1.33983	0.83306	-0.06784	-0.68024	0.99367	0.25339	2.97801	0.04652	0.21774	2.23598	0.27688	-0.36581	-4.16174	0.00067	-0.33635	-3.51395	0.00831	-0.01513	-0.07675	1	-0.05077	-0.78571	0.98635	0.02945
ENST00000215919	0.98446	0.43954	0.75011	-0.09868	0.04259	1	0.02706	0.58483	0.99718	0.04033	0.65504	0.99473	-0.23115	-0.82295	0.98231	0.12679	1.07504	0.93462	0.1647	1.26124	0.86847	0.12574	0.54111	0.99817	0.13901	0.60737	0.99651	-0.13246	-0.85695	0.97822	0.22547	1.02575	0.94742	0.26338	1.21241	0.88853	0.01327	0.03757	1	-0.25821	-1.33179	0.83605	0.09973	0.44359	0.99941	0.13763	0.61942	0.99611	-0.27148
ENST00000215941	1.07307	0.38352	0.71205	-0.17057	-2.24444	0.2742	-0.05537	-1.00052	0.95372	-0.0089	-0.47531	0.99914	-0.03782	-0.66587	0.99431	0.00723	-0.20259	0.99999	-0.04088	-0.67094	0.99409	0.11521	1.07656	0.93471	0.16167	1.70298	0.61448	0.13275	1.48399	0.7543	0.1778	1.94148	0.45402	0.12969	1.49338	0.74877	0.04647	0.53484	0.99831	0.01754	0.34494	0.99986	0.06259	0.77323	0.98736	0.01448	0.34545	0.99986	-0.02892
ENST00000215956	0.47787	0.82372	0.94077	0.2309	0.81045	0.98388	0.27036	0.66736	0.99427	0.4304	1.33204	0.83663	0.14626	0.30376	0.99994	0.27967	0.70122	0.99251	0.47956	1.32523	0.83996	0.03947	-0.08558	1	0.1995	0.53387	0.99833	-0.08464	-0.46986	0.99919	0.04878	-0.07897	1	0.24866	0.53878	0.99825	0.16003	0.58492	0.99722	-0.12411	-0.35752	0.99983	0.00931	0.00893	1	0.20919	0.58944	0.9971	-0.28414
ENST00000215957	0.96272	0.45429	0.76087	-0.02169	0.03144	1	0.40019	1.92466	0.46495	0.09423	0.6995	0.99261	0.05943	0.1723	1	-0.01604	-0.05771	1	0.21417	0.93476	0.96682	0.42188	1.88565	0.49092	0.11591	0.66233	0.9945	0.08112	0.14109	1	0.00565	-0.08738	1	0.23586	0.90045	0.97244	-0.30597	-1.24714	0.87515	-0.34077	-1.69095	0.62251	-0.41624	-1.91043	0.47433	-0.18603	-0.99608	0.95474	-0.0348
ENST00000216014	1.5262	0.17725	0.50974	-0.07219	-0.08299	1	0.0784	0.29521	0.99994	0.04837	0.35487	0.99983	0.60268	1.79338	0.55912	0.56886	1.96876	0.4463	0.42841	1.60936	0.67696	0.1506	0.37014	0.99978	0.12056	0.4334	0.99945	0.67488	1.86037	0.51612	0.64105	2.03429	0.4067	0.5006	1.67787	0.63333	-0.03004	0.03971	1	0.52428	1.39143	0.80345	0.49046	1.55915	0.7081	0.35001	1.22169	0.88254	0.55432
ENST00000216019	10.8495	0	0	-0.54289	-2.88923	0.05957	0.74185	3.08645	0.03374	-0.67111	-3.71011	0.00399	-0.46753	-2.75805	0.08499	0.11224	0.58536	0.99723	0.15489	0.64224	0.99538	1.28474	5.635	0	-0.12823	-0.8532	0.97912	0.07535	0.03138	1	0.65513	3.32307	0.01579	0.69778	3.40523	0.01196	-1.41296	-6.31773	0	-1.20938	-5.45773	0	-0.62961	-2.44602	0.18042	-0.58695	-2.41299	0.19379	0.20358
ENST00000216027	1.83291	0.09966	0.38273	0.48914	1.42681	0.78535	0.21983	0.67042	0.9938	0.20702	0.48461	0.99898	0.20381	0.40807	0.99962	0.10809	-0.25995	0.99997	0.87655	2.73431	0.10732	-0.26932	-0.66082	0.99421	-0.28212	-0.90317	0.97062	-0.28533	-0.96352	0.95967	-0.38105	-1.60896	0.67712	0.3874	1.3488	0.8256	-0.0128	-0.2018	0.99999	-0.01602	-0.2657	0.99997	-0.11173	-0.8792	0.97452	0.65672	1.92005	0.47595	-0.00321
ENST00000216029	0.86872	0.52054	0.80065	0.15617	0.60146	0.99654	-0.15693	-0.51327	0.99858	0.23295	0.88742	0.97311	0.18623	0.62576	0.99568	0.25735	0.77526	0.98654	0.44981	1.68369	0.62926	-0.3131	-1.06613	0.93554	0.07678	0.29161	0.99994	0.03007	0.03955	1	0.10118	0.19204	1	0.29364	1.08876	0.92886	0.38988	1.32591	0.83711	0.34316	1.07848	0.93195	0.41428	1.21386	0.88629	0.60674	2.06965	0.38334	-0.04672
ENST00000216034	4.05702	0.00108	0.01979	-0.02635	-0.60202	0.99676	-0.19258	-3.18144	0.02512	0.09903	1.5014	0.7441	-0.06739	-0.90406	0.97198	-0.0019	-0.19534	1	-0.09731	-1.82622	0.53039	-0.16623	-2.59024	0.12968	0.12539	2.06436	0.37477	-0.04103	-0.31624	0.99992	0.02445	0.38232	0.99976	-0.07096	-1.22983	0.88258	0.29162	4.49239	0.00016	0.1252	2.22035	0.28515	0.19068	2.8707	0.06294	0.09527	1.36805	0.81884	-0.16642
ENST00000216037	1.11945	0.35614	0.69002	0.02149	0.19259	1	0.19874	0.47515	0.99913	-0.54982	-1.68058	0.62959	-0.29709	-0.71543	0.99157	0.03461	0.09821	1	-0.04071	0.23572	0.99999	0.17724	0.29214	0.99995	-0.57132	-1.83804	0.52359	-0.31858	-0.88895	0.97393	0.01311	-0.08702	1	-0.06221	0.04512	1	-0.74856	-1.99542	0.42022	-0.49582	-1.11528	0.92291	-0.16413	-0.36573	0.99981	-0.23945	-0.24673	0.99998	0.25274
ENST00000216038	1.73946	0.11916	0.41962	0.02805	0.5791	0.99739	-0.06277	-1.34669	0.82967	0.0326	0.6156	0.99634	0.07656	1.44355	0.77794	-0.02836	-0.45666	0.99932	-0.04186	-0.91771	0.96982	-0.09082	-1.87263	0.49894	0.00455	0.04439	1	0.04851	0.87464	0.97628	-0.05641	-1.00701	0.95251	-0.06991	-1.46736	0.76427	0.09537	1.88783	0.48872	0.13933	2.64194	0.1144	0.03442	0.871	0.97679	0.02091	0.44654	0.9994	0.04397
ENST00000216039	0.84553	0.53773	0.81002	-0.02977	-0.23317	0.99999	0.00586	0.49335	0.99894	0.06192	1.20916	0.89061	0.038	0.83761	0.98091	0.0563	1.30034	0.8518	-0.02118	-0.26064	0.99997	0.03564	0.70602	0.99223	0.09169	1.42214	0.78979	0.06777	1.05277	0.94123	0.08607	1.51145	0.73797	0.00859	-0.03423	1	0.05606	0.64044	0.99543	0.03214	0.30581	0.99993	0.05044	0.73619	0.99029	-0.02704	-0.72081	0.99132	-0.02392
ENST00000216044	1.81996	0.10201	0.38752	-0.12879	-1.36355	0.82108	0.03174	0.99643	0.9548	-0.0252	0.46838	0.99921	-0.16782	-1.77795	0.56338	-0.07875	-0.51807	0.9986	-0.09387	-0.81599	0.98337	0.16052	2.25666	0.26654	0.10359	1.7988	0.54918	-0.03904	-0.45074	0.99937	0.05004	0.79905	0.98508	0.03491	0.50936	0.99873	-0.05694	-0.54202	0.9982	-0.19956	-2.62222	0.1205	-0.11049	-1.44775	0.77551	-0.12561	-1.73007	0.5959	-0.14262
ENST00000216061	1.3241	0.25281	0.59816	0.73965	1.01552	0.94965	0.08555	0.52508	0.99846	-0.03279	-0.25078	0.99998	0.72325	1.37336	0.81484	0.13171	0.52749	0.99842	-0.43533	-1.11017	0.92452	-0.6541	-0.4558	0.9993	-0.77244	-1.22829	0.88192	-0.0164	0.37073	0.99979	-0.60795	-0.47552	0.99911	-1.17499	-2.04546	0.39072	-0.11834	-0.74747	0.98929	0.6377	0.81098	0.98345	0.04616	-0.00988	1	-0.52088	-1.55174	0.71303	0.75604
ENST00000216068	1.35887	0.23669	0.58102	0.01277	0.22797	0.99999	-0.05136	-0.27259	0.99997	0.1193	1.40975	0.79568	0.13229	1.43596	0.7812	0.19632	1.96791	0.43995	0.07947	1.06037	0.93845	-0.06413	-0.4818	0.99904	0.10653	1.17153	0.90345	0.11952	1.20202	0.89203	0.18355	1.72852	0.59836	0.0667	0.8286	0.98157	0.17066	1.58194	0.69404	0.18365	1.60528	0.67921	0.24768	2.10311	0.35694	0.13083	1.25493	0.87093	0.01299
ENST00000216083	0.56959	0.75386	0.91387	-0.58394	-1.62555	0.67358	-0.66259	-0.93832	0.95561	-1.49308	-1.53464	0.72147	-1.01841	-1.94988	0.49957	-0.87241	-1.82768	0.56217	-0.83298	-1.68374	0.64071	-0.07864	0.56143	0.9968	-0.90914	0.1126	1	-0.43446	-0.33747	0.99982	-0.28847	-0.26841	0.99995	-0.24904	-0.12699	1	-0.83049	-0.46248	0.99898	-0.35582	-0.8695	0.97069	-0.20982	-0.78948	0.98186	-0.17039	-0.6612	0.99263	0.47468
ENST00000216085	1.29077	0.26651	0.61144	0.0822	0.28696	0.99995	0.15494	0.05584	1	-0.07473	-0.71424	0.99161	-0.11134	-0.65936	0.99454	-0.3427	-2.16094	0.32111	-0.11669	-0.64645	0.99512	0.07274	-0.20743	0.99999	-0.15693	-0.97877	0.95797	-0.19354	-0.92187	0.96859	-0.4249	-2.39438	0.20633	-0.19889	-0.91161	0.97037	-0.22967	-0.70697	0.99204	-0.26628	-0.65762	0.99461	-0.49764	-2.0233	0.40331	-0.27163	-0.64546	0.99515	-0.03661
ENST00000216101	0.12681	0.9928	0.99841	-0.01681	0.3921	0.99964	0.06574	0.26829	0.99996	-0.15032	0.0637	1	-0.2522	0.27201	0.99996	-0.2898	0.11351	1	0.27393	0.81509	0.98043	0.08255	-0.09625	1	-0.13351	-0.32338	0.99988	-0.23538	-0.11374	1	-0.27299	-0.26756	0.99996	0.29074	0.44202	0.99928	-0.21606	-0.20602	0.99999	-0.31794	-0.01116	1	-0.35554	-0.15546	1	0.20819	0.50716	0.99843	-0.10188
ENST00000216106	0.47958	0.82227	0.94034	-0.20937	0.14849	1	-0.84088	-0.77065	0.98703	-1.15555	-0.93105	0.96625	-1.10066	-1.08815	0.92949	-0.75667	-0.75067	0.98867	-1.33225	-1.00246	0.95199	-0.63151	-0.9226	0.96774	-0.94618	-1.09208	0.92853	-0.89129	-1.247	0.87297	-0.5473	-0.90321	0.97089	-1.12288	-1.16486	0.90512	-0.31468	-0.11598	1	-0.25978	-0.29003	0.99995	0.08421	0.02559	1	-0.49137	-0.19289	1	0.0549
ENST00000216117	3.87712	0.00158	0.02617	0.48	2.53989	0.14716	-0.28468	-1.10874	0.92549	0.04707	0.3205	0.99991	0.38537	2.24435	0.27359	-0.02837	0.54186	0.9982	-0.15858	-1.05892	0.9397	-0.76467	-3.48134	0.00958	-0.43293	-2.16828	0.31461	-0.09462	-0.23072	0.99999	-0.50837	-1.94921	0.44851	-0.63858	-3.48725	0.00938	0.33174	1.38245	0.81123	0.67005	3.17616	0.02614	0.2563	1.59104	0.68819	0.12609	0.07231	1	0.33831
ENST00000216121	2.17608	0.05128	0.26906	0.19941	0.74123	0.98956	0.35081	1.90599	0.48198	-0.01065	-0.08832	1	0.67189	2.41247	0.20857	0.63258	2.3535	0.23171	0.40791	1.33758	0.83238	0.15139	1.1907	0.89565	-0.21006	-0.80417	0.98397	0.47248	1.67134	0.63714	0.43317	1.61778	0.67141	0.20849	0.62044	0.99597	-0.36146	-1.93934	0.4607	0.32109	0.43292	0.99946	0.28178	0.38648	0.99972	0.0571	-0.56236	0.99765	0.68255
ENST00000216122	0.494	0.81154	0.93646	0.16044	0.63898	0.99546	0.009	0.05684	1	-0.02979	-0.1145	1	0.07369	0.18114	1	-0.08372	-0.26511	0.99997	0.5047	1.22782	0.88298	-0.15144	-0.53972	0.99822	-0.19023	-0.73681	0.99019	-0.08675	-0.43257	0.9995	-0.24416	-0.87833	0.97562	0.34425	0.61349	0.99636	-0.03879	-0.16229	1	0.06469	0.11478	1	-0.09272	-0.30234	0.99994	0.49569	1.10021	0.92779	0.10348
ENST00000216124	0.80788	0.56572	0.82444	0.2145	0.8886	0.97399	-0.09026	0.54373	0.99814	0.48075	1.03645	0.94494	0.39904	1.27103	0.86433	-0.48804	-0.44182	0.99943	0.34972	1.06919	0.93645	-0.30476	-0.30999	0.99993	0.26624	0.17591	1	0.18453	0.41294	0.99961	-0.70254	-1.30751	0.84803	0.13522	0.21429	0.99999	0.57101	0.47117	0.99917	0.4893	0.69961	0.9925	-0.39778	-0.95355	0.96325	0.43998	0.50673	0.99875	-0.08171
ENST00000216127	8.42667	0	2e-05	0.81462	6.61765	0	0.55694	3.95167	0.00166	0.59938	4.37494	0.00028	0.55727	4.35415	0.00031	0.48097	3.79264	0.00305	0.44563	2.92694	0.0543	-0.25768	-2.20625	0.29387	-0.21524	-2.13496	0.33372	-0.25735	-2.05161	0.38362	-0.33365	-2.60177	0.1274	-0.36899	-3.46304	0.01026	0.04244	0.16823	1	0.00033	0.21881	0.99999	-0.07597	-0.30055	0.99994	-0.11131	-1.10311	0.92714	-0.04211
ENST00000216129	1.31373	0.25764	0.60263	0.08477	0.88095	0.97527	0.28366	2.42948	0.18914	0.18211	1.90458	0.47844	0.123	1.19047	0.89755	0.07196	0.85793	0.97839	0.22752	1.68686	0.62525	0.19889	1.59942	0.68282	0.09734	1.02518	0.94801	0.03824	0.33682	0.99988	-0.0128	0.00437	1	0.14275	0.83051	0.98168	-0.10155	-0.61875	0.9962	-0.16065	-1.23781	0.8789	-0.21169	-1.55202	0.71293	-0.05614	-0.77844	0.9869	-0.05911
ENST00000216133	5.80848	3e-05	0.00115	-0.19804	-2.62545	0.11857	0.13695	1.80615	0.54391	-0.16396	-2.07615	0.36711	-0.17155	-2.33116	0.22929	-0.02058	0.01009	1	0.07763	1.14848	0.91289	0.33499	4.21747	0.0005	0.03409	0.51136	0.99871	0.0265	0.21108	0.99999	0.17746	2.523	0.15123	0.27568	3.66323	0.00471	-0.3009	-3.68851	0.00429	-0.3085	-3.9069	0.00184	-0.15753	-1.73162	0.59469	-0.05932	-0.67711	0.99384	-0.00759
ENST00000216146	2.2193	0.04689	0.25651	0.34844	2.46806	0.17122	0.01409	0.7794	0.98694	0.11176	1.19548	0.89612	0.45558	2.81858	0.07208	0.25177	1.93119	0.45954	0.36563	2.58314	0.13126	-0.33435	-1.5402	0.7204	-0.23668	-1.23722	0.87966	0.10714	0.43659	0.99948	-0.09667	-0.46189	0.99928	0.01719	0.19059	1	0.09767	0.35181	0.99985	0.44149	1.90652	0.47598	0.23768	1.06104	0.93929	0.35154	1.68211	0.62814	0.34382
ENST00000216155	1.61177	0.14953	0.46935	0.08957	-0.30611	0.99987	-0.26575	-1.04755	0.92637	-1.11564	-3.04579	0.12223	-1.19121	-2.62824	0.22099	-0.39452	-1.49248	0.74328	-0.44982	-1.42971	0.77512	-0.35532	-0.79408	0.97784	-1.20521	-2.84754	0.17413	-1.28078	-2.41552	0.30172	-0.48409	-1.24997	0.85512	-0.53939	-1.18569	0.88095	-0.84989	-1.78729	0.58348	-0.92546	-1.40814	0.78625	-0.12877	-0.40123	0.99945	-0.18407	-0.34664	0.99976	-0.07557
ENST00000216160	1.96831	0.07695	0.33534	-0.0309	-0.41213	0.99962	0.05121	0.85877	0.97837	0.13165	2.36335	0.2155	-0.03429	-0.50899	0.99874	0.01941	0.427	0.99954	-0.01228	-0.35711	0.99984	0.08211	1.23225	0.88153	0.16255	2.73313	0.09133	-0.00339	-0.10926	1	0.05031	0.81617	0.98334	0.01862	0.04098	1	0.08044	1.34855	0.82865	-0.0855	-1.29908	0.85246	-0.0318	-0.42968	0.99952	-0.06349	-1.16136	0.90834	-0.16594
ENST00000216181	16.9552	0	0	0.69528	7.55411	0	0.43655	4.97236	1e-05	0.64579	7.25759	0	0.84613	8.37633	0	0.56152	6.13671	0	0.41683	4.66761	6e-05	-0.25873	-2.11199	0.34548	-0.04948	-0.20363	0.99999	0.15085	1.11312	0.92433	-0.13376	-1.16401	0.90757	-0.27845	-2.6578	0.10932	0.20925	1.89385	0.48441	0.40959	3.09966	0.03196	0.12497	0.94953	0.96434	-0.01972	-0.45106	0.99937	0.20034
ENST00000216185	1.48525	0.19019	0.52709	0.05424	0.24888	0.99998	-0.07799	-0.3897	0.99973	0.2022	1.33753	0.83425	0.07014	0.57962	0.99738	0.24403	1.35219	0.82696	-0.12974	-1.0951	0.92973	-0.13223	-0.61789	0.99627	0.14796	1.07964	0.93416	0.0159	0.33472	0.99989	0.18979	1.1007	0.92806	-0.18398	-1.32388	0.84091	0.28019	1.62895	0.66351	0.14813	0.91743	0.96989	0.32202	1.63955	0.65652	-0.05174	-0.64643	0.99522	-0.13206
ENST00000216187	2.03128	0.06808	0.31458	-0.08934	-0.51685	0.99822	0.19904	0.72284	0.98895	-1.54158	-2.33362	0.26839	-1.0179	-2.05969	0.4096	-0.44122	-1.19266	0.88892	-0.9468	-1.56287	0.70569	0.28838	1.19951	0.88429	-1.45224	-1.78105	0.57205	-0.92855	-1.53196	0.72363	-0.35187	-0.68758	0.99187	-0.85745	-1.04571	0.93741	-1.74062	-2.88703	0.10459	-1.21694	-2.62559	0.17432	-0.64026	-1.80539	0.56109	-1.14584	-2.16668	0.35591	0.52368
ENST00000216190	1.56798	0.16369	0.49033	0.18248	2.62363	0.11962	0.15493	1.91447	0.47092	0.13712	1.88818	0.4885	0.09806	1.24031	0.87828	0.05468	0.5718	0.99757	0.07701	1.12733	0.91979	-0.02755	-0.5359	0.99831	-0.04537	-0.69002	0.99316	-0.08443	-1.28699	0.85804	-0.12781	-1.95014	0.44734	-0.10548	-1.412	0.79551	-0.01782	-0.12002	1	-0.05688	-0.69044	0.99314	-0.10026	-1.31309	0.84599	-0.07793	-0.80443	0.98457	-0.03906
ENST00000216200	23.0462	0	0	-2.16202	-2.7746	0.11135	0.74084	1.76879	0.58447	-4.12612	-6.84899	0	-1.44185	-1.54768	0.71474	1.00047	1.63469	0.66488	0.69766	1.7758	0.57981	2.90286	4.34602	0.00489	-1.96409	-4.67497	0.00015	0.72018	1.19297	0.89386	3.1625	4.20497	0.00943	2.85968	4.43049	0.00363	-4.86695	-7.851	0	-2.18268	-3.19956	0.05925	0.25964	-0.13473	1	-0.04318	-0.03136	1	2.68427
ENST00000216211	5.91644	2e-05	0.00097	0.60763	3.35658	0.01608	0.16143	0.73015	0.99062	0.67688	2.55403	0.14576	0.83486	4.73198	0.0001	0.21039	0.85865	0.97818	0.11238	0.29687	0.99994	-0.4462	-2.39149	0.2077	0.06925	-0.72013	0.99121	0.22723	1.49053	0.75002	-0.39724	-2.34781	0.22684	-0.49525	-2.93198	0.05656	0.51545	1.65762	0.64499	0.67343	3.72082	0.005	0.04896	0.09844	1	-0.04905	-0.42627	0.99953	0.15799
ENST00000216218	6.778	0	0.00018	-0.30216	-4.33574	0.0003	-0.06312	-0.82875	0.98203	-0.29337	-4.26264	0.00041	-0.3274	-4.71311	5e-05	-0.14945	-2.09193	0.35744	-0.11379	-1.60179	0.68124	0.23903	3.21189	0.02247	0.00879	0.02143	1	-0.02524	-0.49204	0.99896	0.15271	2.09095	0.35803	0.18837	2.59395	0.12781	-0.23025	-3.15841	0.02662	-0.26428	-3.59675	0.00599	-0.08632	-1.15621	0.91028	-0.05066	-0.69464	0.99293	-0.03403
ENST00000216223	9.11753	0	1e-05	1.06693	4.09607	0.00385	0.59324	2.36223	0.23962	1.66654	5.65231	0.0001	1.27859	4.03271	0.00574	0.31422	1.3402	0.82956	-0.09697	-0.33018	0.99989	-0.47368	-1.48253	0.75277	0.59961	1.71252	0.61521	0.21167	0.11747	1	-0.75271	-2.60907	0.15354	-1.16389	-4.26372	0.00222	1.0733	3.05825	0.06692	0.68535	1.53841	0.72019	-0.27903	-1.02557	0.94509	-0.69021	-2.58766	0.1545	-0.38794
ENST00000216225	2.16428	0.05237	0.27228	0.06106	0.66586	0.99437	-0.08012	-1.46377	0.76636	0.14878	1.90027	0.48035	0.11769	1.24725	0.8754	0.01766	0.19737	1	-0.00298	-0.30133	0.99994	-0.14118	-2.06531	0.37401	0.08772	1.22695	0.88376	0.05663	0.59739	0.9969	-0.0434	-0.44209	0.99944	-0.06404	-0.93704	0.96654	0.22889	3.18339	0.02492	0.1978	2.5622	0.13849	0.09778	1.58944	0.68922	0.07714	1.13065	0.91873	-0.03109
ENST00000216237	0.6301	0.70591	0.89238	-0.63356	-1.36164	0.82165	-0.65261	-1.43164	0.78429	-0.0731	-0.19694	1	-0.40384	-1.05602	0.94006	-0.57753	-1.22832	0.88271	-0.46813	-0.86509	0.97736	-0.01905	-0.15417	1	0.56046	1.12639	0.91959	0.22972	0.24652	0.99998	0.05603	0.0935	1	0.16543	0.46332	0.99925	0.57951	1.20928	0.89024	0.24876	0.37901	0.99977	0.07507	0.23725	0.99999	0.18448	0.58485	0.99722	-0.33074
ENST00000216241	1.01829	0.41757	0.73581	-0.25672	-1.11711	0.92097	-0.065	-0.24125	0.99998	0.15385	0.72938	0.99027	-0.0179	-0.0023	1	-0.33409	-1.12098	0.91992	0.16175	0.57833	0.99725	0.19172	0.7941	0.98488	0.41057	1.81113	0.54523	0.23882	1.07096	0.93445	-0.07738	-0.03557	1	0.41847	1.63636	0.65954	0.21885	0.91402	0.9691	0.0471	0.23092	0.99999	-0.2691	-0.80684	0.98365	0.22675	0.77115	0.98697	-0.17175
ENST00000216252	2.35453	0.03588	0.21927	-0.07287	-0.88666	0.97442	-0.04822	-0.78027	0.98673	-0.0921	-1.41745	0.79223	-0.11676	-1.65163	0.64875	0.05659	1.00741	0.95216	-0.15446	-2.4018	0.20044	0.02465	0.04418	1	-0.01923	-0.53802	0.99825	-0.0439	-0.78879	0.98595	0.12946	1.84466	0.5187	-0.0816	-1.53556	0.72316	-0.04388	-0.54575	0.99811	-0.06855	-0.78057	0.9867	0.10481	1.68419	0.62709	-0.10624	-1.47732	0.75824	-0.02467
ENST00000216254	4.10229	0.00099	0.01847	0.26197	2.26671	0.26035	0.04428	0.56195	0.9978	0.42592	3.96791	0.00142	0.02443	0.24897	0.99998	0.17378	1.26515	0.86787	0.01156	-0.10203	1	-0.21768	-1.54971	0.71447	0.16395	1.71995	0.60257	-0.23753	-1.93054	0.45989	-0.08819	-0.91134	0.9709	-0.25041	-2.2818	0.25279	0.38163	3.14985	0.02731	-0.01985	-0.31034	0.99993	0.12949	0.63995	0.99548	-0.03272	-0.63811	0.99555	-0.40148
ENST00000216259	0.76986	0.5953	0.8395	-0.14997	-0.63244	0.99559	-0.08441	-0.44048	0.99942	-0.07398	-0.562	0.9977	0.04222	-0.03648	1	-0.21606	-0.66349	0.99429	0.36132	1.18404	0.89861	0.06556	0.1485	1	0.076	0.05713	1	0.1922	0.56596	0.9976	-0.06609	-0.04708	1	0.5113	1.77557	0.56747	0.01043	-0.09229	1	0.12663	0.388	0.99972	-0.13165	-0.18902	1	0.44574	1.52861	0.72703	0.1162
ENST00000216264	1.77397	0.11173	0.40563	0.05634	1.38293	0.81104	0.15008	2.59385	0.12886	0.14197	2.45115	0.17866	0.15485	2.28719	0.25124	0.05559	1.4942	0.74841	0.14786	2.24768	0.27099	0.09374	1.30342	0.85046	0.08563	1.08326	0.93304	0.09851	0.95396	0.9634	-0.00075	0.15815	1	0.09152	0.91665	0.96996	-0.00811	-0.26605	0.99997	0.00477	-0.36307	0.99982	-0.09449	-1.11446	0.92378	-0.00222	-0.40476	0.99966	0.01288
ENST00000216267	0.5653	0.75723	0.9152	-0.42881	-1.00947	0.95126	-0.13673	-0.41863	0.99957	0.44969	0.74599	0.9893	0.01341	-0.09306	1	-0.16095	-0.45218	0.99934	-0.22521	-0.59592	0.99687	0.29208	0.50931	0.9987	0.8785	1.69175	0.6228	0.44222	0.8573	0.97809	0.26786	0.51196	0.99866	0.20359	0.37978	0.99976	0.58642	1.09116	0.92963	0.15014	0.31147	0.99992	-0.02421	-0.01621	1	-0.08848	-0.14428	1	-0.43628
ENST00000216268	1.04825	0.39878	0.72344	-0.11311	-0.8618	0.97779	0.00453	0.21017	0.99999	-0.13168	-1.26684	0.86649	-0.13853	-1.28439	0.85867	0.07058	0.59116	0.99703	-0.07962	-0.85618	0.97853	0.11764	1.00752	0.95201	-0.01857	-0.41635	0.99959	-0.02542	-0.44991	0.99937	0.18369	1.40962	0.79638	0.03348	-0.02225	1	-0.13621	-1.37859	0.81288	-0.14306	-1.39672	0.80329	0.06605	0.34868	0.99986	-0.08415	-1.00161	0.95336	-0.00685
ENST00000216271	1.88712	0.08919	0.36028	-0.11597	-1.16672	0.89044	0.57165	0.67662	0.99027	-0.40571	-1.26604	0.85263	-0.97316	-2.32349	0.31408	0.18101	-0.08827	1	-0.68179	-2.51765	0.23517	0.68762	1.78544	0.59024	-0.28975	-0.11791	1	-0.85719	-1.16947	0.89157	0.29698	1.01989	0.93645	-0.56582	-1.39146	0.79653	-0.97737	-1.86642	0.54577	-1.54481	-2.87082	0.16698	-0.39064	-0.725	0.98634	-1.25344	-3.05689	0.12481	-0.56744
ENST00000216274	0.97144	0.44761	0.75587	0.87656	1.97659	0.44865	0.3475	0.80422	0.98315	0.94406	1.97385	0.45085	0.609	1.50906	0.73751	0.19098	0.73664	0.98937	0.75584	1.17997	0.89703	-0.52907	-1.05793	0.93541	0.0675	0.03701	1	-0.26756	-0.42757	0.99944	-0.68558	-1.18231	0.89556	-0.12072	-0.70472	0.99121	0.59656	1.07432	0.9307	0.2615	0.63394	0.99508	-0.15652	-0.08815	1	0.40835	0.34648	0.99984	-0.33506
ENST00000216277	0.12519	0.99304	0.99841	-0.36821	-0.8021	0.98477	-0.02692	-0.27088	0.99997	-0.17753	-0.53987	0.99823	-0.24872	-0.33181	0.99989	-0.15	-0.28258	0.99996	-0.07941	-0.28034	0.99996	0.34129	0.47012	0.99919	0.19067	0.24458	0.99998	0.11949	0.44689	0.9994	0.21821	0.48982	0.99898	0.28879	0.49193	0.99896	-0.15061	-0.23442	0.99999	-0.2218	-0.04393	1	-0.12308	-0.00036	1	-0.05249	0.00152	1	-0.07119
ENST00000216281	1.31199	0.25832	0.60324	0.02268	-0.10158	1	-0.19453	-1.2375	0.87957	0.32192	1.19239	0.8973	-0.13348	-0.60452	0.9967	-0.28301	-1.27831	0.86208	-0.0793	-0.37546	0.99978	-0.21721	-1.12748	0.91983	0.29924	1.27225	0.86476	-0.15616	-0.49791	0.99889	-0.30569	-1.16122	0.90856	-0.10199	-0.27315	0.99997	0.51645	2.30443	0.24175	0.06106	0.63462	0.99568	-0.08847	0.01001	1	0.11523	0.84557	0.98008	-0.4554
ENST00000216286	0.76379	0.60006	0.84222	0.05107	1.0087	0.95143	-0.35947	-0.0915	1	0.18786	1.43899	0.77974	-0.30899	-0.00962	1	0.19693	1.14647	0.91256	0.04098	0.55669	0.99786	-0.41053	-1.05409	0.94035	0.13679	0.46269	0.99924	-0.36005	-1.00042	0.9533	0.14587	0.1863	1	-0.01009	-0.41567	0.99959	0.54733	1.46405	0.76557	0.05048	0.08072	1	0.5564	1.18384	0.89947	0.40045	0.62198	0.99604	-0.49684
ENST00000216288	1.44804	0.20194	0.54127	0.70749	0.75054	0.98871	-0.13408	-0.11402	1	0.16199	0.62962	0.99564	1.9297	2.15084	0.34475	0.36768	0.77641	0.98665	-0.76543	-0.69901	0.99245	-0.84157	-0.81352	0.98287	-0.5455	-0.12737	1	1.22221	1.41881	0.78814	-0.33981	0.03099	1	-1.47292	-1.41596	0.79183	0.29607	0.7001	0.99227	2.06378	2.14511	0.34662	0.50176	0.83721	0.98032	-0.63134	-0.5341	0.99828	1.76771
ENST00000216294	2.81985	0.01393	0.12174	-0.13156	-1.2741	0.86258	-0.22655	-2.3634	0.22217	0.07236	0.77765	0.98671	-0.08923	-1.10701	0.92491	-0.04749	-0.10503	1	-0.21321	-2.43527	0.1914	-0.09499	-1.15764	0.90854	0.20392	2.00322	0.41796	0.04233	0.12393	1	0.08407	1.11491	0.9226	-0.08165	-1.1862	0.89839	0.29891	3.02534	0.04596	0.13732	1.2397	0.87723	0.17906	2.17285	0.31677	0.01334	0.01491	1	-0.16159
ENST00000216297	0.7958	0.57528	0.82954	0.04995	0.61967	0.99619	0.08454	0.81634	0.98332	0.03961	0.25093	0.99998	0.17478	1.53854	0.72138	-0.01103	-0.02144	1	-0.03396	-0.40777	0.99965	0.03458	0.23575	0.99999	-0.01034	-0.35518	0.99984	0.12483	0.93374	0.96705	-0.06099	-0.61502	0.99635	-0.08391	-1.00161	0.95367	-0.04492	-0.56541	0.99771	0.09024	0.65068	0.99502	-0.09557	-0.80616	0.98437	-0.1185	-1.16932	0.90553	0.13517
ENST00000216330	0.58747	0.73978	0.90768	-0.33316	-0.39632	0.99967	0.28534	0.79477	0.98422	-0.33634	-0.69077	0.99254	-0.02241	0.18103	1	0.28939	0.67196	0.9935	-0.30677	-0.44105	0.99939	0.61849	1.1649	0.90328	-0.00318	-0.30115	0.99993	0.31074	0.56724	0.99743	0.62254	1.05213	0.9385	0.02638	-0.05623	1	-0.62167	-1.42908	0.78328	-0.30775	-0.60785	0.99619	0.00405	-0.13492	1	-0.59211	-1.18975	0.89447	0.31392
ENST00000216336	1.83276	0.10006	0.38369	1.03679	2.29369	0.27718	0.94956	1.84742	0.52694	0.46209	0.97702	0.95621	1.82952	3.0211	0.08459	1.32161	2.04802	0.40744	0.67535	1.62192	0.66937	-0.08722	-0.28624	0.99995	-0.5747	-1.27769	0.85643	0.79273	0.86655	0.97276	0.28482	-0.09452	1	-0.36144	-0.60076	0.9963	-0.48747	-0.91312	0.96762	0.87995	1.0913	0.92253	0.37204	0.1817	1	-0.27421	-0.28519	0.99995	1.36743
ENST00000216350	0.79947	0.5724	0.82785	0.58389	0.5647	0.99655	0.95665	1.8229	0.57151	0.99799	1.97689	0.48482	0.63648	1.59635	0.68859	0.68784	1.6143	0.67844	0.1928	0.3483	0.99979	0.37276	1.29269	0.83566	0.4141	1.43321	0.77256	0.05259	1.048	0.92638	0.10395	1.08621	0.91587	-0.39109	-0.18677	0.99999	0.04134	0.11504	1	-0.32017	-0.26082	0.99995	-0.26881	-0.16556	1	-0.76385	-1.39947	0.78889	-0.36151
ENST00000216361	1.50755	0.18255	0.51699	0.18461	0.12885	1	0.82252	2.66534	0.22139	1.08658	2.91784	0.15946	0.80771	1.38614	0.79581	0.8587	1.65934	0.65535	0.68112	1.26067	0.85368	0.6379	2.55022	0.2603	0.90197	2.79757	0.19196	0.62309	1.2599	0.85165	0.67409	1.53815	0.71974	0.4965	1.13804	0.90002	0.26407	0.09785	1	-0.01481	-1.37905	0.79739	0.03618	-1.00505	0.93704	-0.1414	-1.36941	0.80257	-0.27888
ENST00000216366	0.46696	0.83148	0.9436	-0.00109	0.1992	0.99999	0.69606	1.30902	0.83868	0.37055	0.14855	1	0.5687	1.14784	0.90327	0.56298	0.8612	0.97426	0.17435	0.21371	0.99999	0.69715	1.1248	0.9114	0.37164	-0.04338	1	0.56978	0.95408	0.95681	0.56406	0.67249	0.99267	0.17544	0.02323	1	-0.32551	-1.13132	0.90855	-0.12736	-0.20878	0.99999	-0.13308	-0.44554	0.9992	-0.5217	-1.06478	0.93013	0.19815
ENST00000216373	10.3428	0	0	-0.50128	-5.14416	1e-05	-0.00092	-0.34163	0.99987	-0.53498	-5.42062	0	-0.484	-4.89891	2e-05	-0.1719	-1.7587	0.57629	-0.17615	-1.68504	0.6262	0.50036	4.39917	0.00023	-0.0337	-0.34086	0.99988	0.01728	0.08849	1	0.32938	3.16994	0.02582	0.32512	3.27822	0.01823	-0.53407	-4.65376	7e-05	-0.48309	-4.1984	0.00055	-0.17098	-1.30297	0.85079	-0.17524	-1.23545	0.88035	0.05098
ENST00000216392	6.14417	2e-05	0.00066	0.70632	3.90618	0.00296	0.50971	2.7379	0.09748	0.7764	4.20848	0.00102	1.10436	5.23326	2e-05	0.65574	3.46424	0.01265	0.81016	4.07542	0.00159	-0.19661	-0.92236	0.96812	0.07008	0.37173	0.99978	0.39804	1.49051	0.74949	-0.05058	-0.28967	0.99995	0.10384	0.3188	0.99991	0.26669	1.25859	0.86878	0.59465	2.30543	0.25416	0.14602	0.61708	0.99614	0.30045	1.19655	0.89396	0.32797
ENST00000216410	9.00224	0	1e-05	-0.41686	-4.74753	6e-05	-0.00666	0.1344	1	-0.39825	-4.49093	0.00018	-0.29227	-3.08143	0.03562	-0.08455	-0.43661	0.99947	-0.05799	-0.45106	0.99936	0.41021	4.51394	0.00017	0.01861	0.19228	1	0.12459	1.50046	0.74453	0.33231	4.1254	0.00087	0.35887	4.12435	0.00087	-0.3916	-4.27767	0.00047	-0.28561	-2.98892	0.04669	-0.07789	-0.53595	0.99829	-0.05134	-0.55048	0.99802	0.10598
ENST00000216416	4.02323	0.00115	0.02063	-0.30168	-3.4856	0.00957	-0.09517	-0.78506	0.98634	-0.21901	-2.41257	0.19543	-0.14591	-1.44847	0.77494	0.03876	0.509	0.99873	-0.00373	-0.10171	1	0.20651	2.45569	0.17806	0.08266	1.01384	0.95079	0.15577	1.90478	0.47812	0.34043	3.83534	0.00268	0.29794	3.24991	0.02085	-0.12385	-1.47303	0.76081	-0.05074	-0.59469	0.99695	0.13392	1.23087	0.8819	0.09143	0.66402	0.99442	0.0731
ENST00000216420	2.42565	0.03101	0.20113	-0.3749	-1.78775	0.55883	0.13067	1.12598	0.91867	-0.36601	-1.88189	0.49615	-0.21997	-0.86412	0.97704	-0.05626	0.21518	0.99999	0.01847	0.36881	0.99979	0.50557	2.76452	0.09264	0.00889	-0.11777	1	0.15493	0.85567	0.97819	0.31864	1.93386	0.46206	0.39337	2.0823	0.36963	-0.49668	-2.83635	0.07746	-0.35064	-1.8882	0.49299	-0.18693	-0.89197	0.97307	-0.1122	-0.74662	0.98919	0.14604
ENST00000216442	1.72845	0.12141	0.42396	0.31773	1.98701	0.42357	0.2504	1.49401	0.74852	0.42026	2.35126	0.22093	0.29229	1.82386	0.53215	0.20257	1.39957	0.80221	0.46491	2.8977	0.05866	-0.06733	-0.36554	0.99981	0.10253	0.39562	0.9997	-0.02544	-0.0968	1	-0.11516	-0.52724	0.99846	0.14718	0.95986	0.96228	0.16986	0.7334	0.9905	0.04189	0.26387	0.99997	-0.04783	-0.14069	1	0.21451	1.2651	0.86769	-0.12797
ENST00000216452	1.90611	0.08666	0.35543	-0.2687	-2.2188	0.28911	-0.11622	-0.93037	0.96734	-0.31391	-2.74569	0.09129	-0.05112	-0.53527	0.99829	-0.00396	-0.54685	0.99808	-0.07891	-0.87621	0.97581	0.15247	1.13133	0.91794	-0.04521	-0.5524	0.99797	0.21758	1.57931	0.6957	0.26473	1.56876	0.70239	0.18978	1.25567	0.87127	-0.19768	-1.62912	0.6636	0.06511	0.39242	0.99971	0.11226	0.38169	0.99975	0.03731	0.07917	1	0.26279
ENST00000216455	3.72132	0.00217	0.03288	0.00116	-0.39073	0.99972	-0.3313	-3.42797	0.01144	-0.03919	-0.50708	0.99876	-0.22015	-2.27593	0.25742	-0.26029	-2.70294	0.09897	-0.21883	-2.62517	0.11999	-0.33246	-3.02176	0.04154	-0.04036	-0.11888	1	-0.22131	-1.8682	0.50241	-0.26145	-2.28682	0.25185	-0.22	-2.21842	0.28689	0.29211	2.8698	0.06387	0.11115	1.176	0.90306	0.07101	0.78699	0.9862	0.11247	0.85275	0.97911	-0.18096
ENST00000216456	1.19008	0.31693	0.65863	0.18961	0.67184	0.99396	-0.12233	0.15386	1	0.97479	1.4529	0.77172	1.02642	1.75842	0.5787	1.59952	1.90625	0.48081	-0.01402	0.47147	0.99917	-0.31194	-0.47989	0.99908	0.78518	0.8316	0.98115	0.83681	1.14598	0.91212	1.40991	1.31628	0.84285	-0.20363	-0.18285	1	1.09712	1.2414	0.87652	1.14875	1.53791	0.72142	1.72185	1.68927	0.62458	0.1083	0.2958	0.99994	0.05164
ENST00000216463	0.23443	0.96446	0.991	0.33338	0.17854	1	-0.04472	0.00387	1	0.43876	0.58554	0.99559	-0.13214	-0.75971	0.98392	0.39711	0.44803	0.99902	0.22615	-0.06468	1	-0.37809	-0.16155	1	0.10539	0.4139	0.99931	-0.46551	-0.94318	0.95406	0.06374	0.28289	0.99993	-0.10723	-0.23441	0.99998	0.48348	0.53882	0.99722	-0.08742	-0.70962	0.98867	0.44183	0.41296	0.99939	0.27087	-0.06438	1	-0.5709
ENST00000216465	3.30096	0.00515	0.06165	-0.09702	-0.80472	0.98439	-0.42496	-2.55373	0.14375	0.23803	1.42813	0.78619	-0.12094	-0.84636	0.97974	-0.05157	-0.51171	0.99868	0.24416	1.08457	0.93229	-0.32794	-1.77164	0.56816	0.33505	2.18467	0.30739	-0.02392	-0.06821	1	0.04545	0.26444	0.99997	0.34118	1.83814	0.52338	0.66299	3.80893	0.00318	0.30402	1.64927	0.65032	0.37339	1.96862	0.43651	0.66912	3.45434	0.01106	-0.35897
ENST00000216468	0.5376	0.77857	0.92298	-0.07263	-0.60917	0.99643	0.14766	1.01336	0.95001	0.01978	-0.05639	1	0.04382	-0.03851	1	0.11111	0.64938	0.99492	0.01342	-0.13348	1	0.22029	1.56795	0.70283	0.09241	0.53653	0.99823	0.11645	0.54364	0.99809	0.18374	1.22375	0.88365	0.08605	0.45227	0.99933	-0.12787	-1.04218	0.94294	-0.10383	-1.01054	0.95055	-0.03655	-0.36843	0.99979	-0.13424	-1.10283	0.92613	0.02404
ENST00000216479	1.06979	0.38543	0.71366	-0.05784	-0.85071	0.97942	-0.1532	-1.97901	0.42836	0.02404	0.30031	0.99994	-0.07951	-1.08804	0.93176	-0.05992	-0.5842	0.99726	-0.05268	-0.47146	0.99919	-0.09536	-1.16748	0.90629	0.08188	1.12519	0.92049	-0.02167	-0.25984	0.99997	-0.00208	0.23827	0.99998	0.00516	0.35357	0.99985	0.17724	2.21302	0.28875	0.07369	0.89046	0.97406	0.09328	1.36016	0.82291	0.10052	1.47482	0.75993	-0.10355
ENST00000216484	8.30141	0	2e-05	0.37983	5.00591	2e-05	0.26469	3.34326	0.01558	0.38643	5.21926	1e-05	0.48078	5.75712	0	0.18819	2.67869	0.10586	0.19585	2.54337	0.14628	-0.11513	-1.32312	0.84086	0.00661	0.27319	0.99997	0.10096	0.94217	0.96536	-0.19164	-2.15421	0.3231	-0.18398	-2.30481	0.24406	0.12174	1.56258	0.7063	0.21609	2.16706	0.31632	-0.07651	-0.73845	0.9901	-0.06885	-0.87288	0.9764	0.09435
ENST00000216487	2.6118	0.02132	0.16065	0.43543	1.55329	0.71198	-0.28988	-1.12324	0.92025	0.37823	1.39634	0.80294	0.66007	2.26482	0.27082	-0.02338	0.16093	1	-0.04005	-0.26401	0.99997	-0.7253	-2.55913	0.14677	-0.0572	-0.139	1	0.22464	0.7605	0.98804	-0.45881	-1.3453	0.8292	-0.47548	-1.75632	0.57963	0.66811	2.40086	0.20566	0.94995	3.19599	0.02883	0.2665	1.23624	0.87909	0.24983	0.83377	0.98111	0.28184
ENST00000216489	0.57622	0.74866	0.91106	0.12228	0.79915	0.98482	-0.02846	-0.36516	0.99981	0.05776	0.44898	0.99937	0.12663	0.39738	0.99969	-0.12898	-0.41114	0.99962	-0.09621	-0.72206	0.99114	-0.15075	-1.10416	0.9262	-0.06452	-0.33618	0.99988	0.00435	-0.369	0.9998	-0.25126	-1.17901	0.90133	-0.21849	-1.48497	0.75351	0.08623	0.77486	0.98709	0.15509	0.72044	0.9912	-0.10052	-0.02832	1	-0.06774	-0.31783	0.99992	0.06887
ENST00000216500	0.76794	0.59679	0.84025	0.39453	1.37565	0.81283	-0.40249	-0.21048	0.99999	0.23205	0.70281	0.99208	-0.44317	-0.28171	0.99996	0.38109	1.02122	0.9476	0.18245	0.57712	0.99731	-0.79703	-1.51634	0.73428	-0.16248	-0.64589	0.99491	-0.83771	-1.6254	0.66657	-0.01345	-0.29137	0.99995	-0.21208	-0.74152	0.98939	0.63455	0.87237	0.97573	-0.04068	-0.06065	1	0.78358	1.17253	0.90249	0.58495	0.75228	0.9887	-0.67523
ENST00000216513	3.44021	0.00387	0.05019	-0.48299	-3.82898	0.00262	-0.2803	-1.84619	0.51703	-0.31327	-2.32877	0.23139	-0.48333	-3.91852	0.00185	-0.33199	-2.56749	0.13728	-0.32611	-2.53155	0.14923	0.20269	1.73673	0.59139	0.16972	1.4389	0.78052	-0.00035	-0.20935	0.99999	0.151	1.12821	0.91945	0.15688	1.1824	0.90084	-0.03296	-0.36293	0.99982	-0.20303	-1.8814	0.49324	-0.05169	-0.62269	0.99609	-0.04581	-0.58256	0.9973	-0.17007
ENST00000216554	1.92271	0.08243	0.34621	-0.23914	-1.44518	0.77695	-0.29668	-1.84625	0.51697	-0.17671	-0.99162	0.95583	-0.42704	-2.51296	0.15584	-0.21193	-1.26274	0.86872	-0.50575	-2.93119	0.0534	-0.05754	-0.47684	0.99913	0.06243	0.43166	0.99951	-0.18789	-1.09458	0.92975	0.02722	0.13903	1	-0.26661	-1.49656	0.74699	0.11997	0.87966	0.97556	-0.13036	-0.56912	0.99763	0.08475	0.59569	0.99694	-0.20907	-0.94348	0.96536	-0.25032
ENST00000216602	4.12076	0.00091	0.01741	-0.93879	-3.35385	0.03342	-0.52825	-1.80388	0.55714	0.47497	1.30085	0.84265	-0.11968	-0.70202	0.99099	-0.1937	-0.60339	0.9961	0.19896	0.31978	0.99989	0.41054	1.34173	0.82734	1.41375	4.52657	0.00323	0.8191	2.52386	0.19334	0.74508	2.60762	0.15907	1.13775	3.48766	0.02561	1.00321	2.97567	0.08891	0.40857	1.08116	0.92775	0.33455	1.16547	0.90126	0.72721	2.02395	0.42553	-0.59465
ENST00000216639	0.68099	0.6653	0.87405	-0.01963	-0.09163	1	0.19725	1.19624	0.89314	-0.03109	-0.4024	0.99965	-0.06882	-0.6315	0.99551	-0.01195	-0.36504	0.9998	-0.06537	-0.57365	0.99738	0.21689	1.27229	0.86192	-0.01146	-0.30904	0.99992	-0.04919	-0.53757	0.99816	0.00769	-0.27444	0.99996	-0.04573	-0.48107	0.99902	-0.22835	-1.54566	0.71644	-0.26608	-1.7465	0.58817	-0.2092	-1.48833	0.75068	-0.26262	-1.69033	0.62468	-0.03773
ENST00000216714	1.16781	0.32915	0.66917	-0.17601	-0.59468	0.99686	0.02617	0.17944	1	-0.52455	-2.11213	0.35182	-0.10618	-0.72414	0.99082	-0.31833	-1.35037	0.82664	-0.18054	-0.79655	0.98494	0.20218	0.72984	0.99044	-0.34854	-1.51412	0.73594	0.06983	-0.14994	1	-0.14232	-0.76777	0.98759	-0.00453	-0.21819	0.99999	-0.55072	-2.12989	0.34197	-0.13235	-0.84743	0.97917	-0.3445	-1.42805	0.78566	-0.20671	-0.91546	0.96944	0.41836
ENST00000216727	2.17374	0.05103	0.26813	-0.29718	-1.12886	0.91877	-0.54537	-2.52257	0.15487	-0.04523	0.28563	0.99996	0.04354	0.48351	0.99904	-0.31401	-1.21858	0.88659	-0.34157	-1.19305	0.89645	-0.24818	-1.44731	0.7755	0.25195	1.38693	0.80847	0.34072	1.55574	0.71055	-0.01682	-0.11683	1	-0.04438	-0.08815	1	0.50013	2.73856	0.09254	0.58891	2.86738	0.06659	0.23136	1.3018	0.85088	0.2038	1.33486	0.83513	0.08877
ENST00000216733	0.51796	0.79379	0.92951	0.29177	0.48021	0.99905	0.42531	1.52344	0.73007	0.06454	0.41302	0.9996	0.21099	0.7236	0.99077	-0.08374	-0.0221	1	-0.03161	0.26649	0.99997	0.13355	1.05348	0.93944	-0.22722	-0.06422	1	-0.08078	0.24952	0.99998	-0.37551	-0.48673	0.99897	-0.32337	-0.20708	0.99999	-0.36077	-1.11089	0.92304	-0.21432	-0.79774	0.98451	-0.50905	-1.50194	0.74297	-0.45692	-1.245	0.87442	0.14644
ENST00000216743	0.1377	0.99105	0.99822	-0.01026	-0.16756	1	0.05558	-0.19997	0.99999	0.1005	0.22546	0.99999	0.12174	0.22267	0.99999	-0.02006	-0.48052	0.99904	0.01841	0.22787	0.99999	0.06584	-0.04337	1	0.11076	0.38596	0.99972	0.132	0.38032	0.99975	-0.0098	-0.31583	0.99992	0.02868	0.38736	0.99972	0.04492	0.40377	0.99964	0.06616	0.39861	0.99967	-0.07564	-0.25379	0.99998	-0.03716	0.40538	0.99964	0.02124
ENST00000216756	2.84998	0.01299	0.11641	1.76269	2.51535	0.17366	1.26381	1.98123	0.4362	2.72702	3.32334	0.03156	2.08494	2.70151	0.12171	1.74345	2.08117	0.37657	2.2296	2.942	0.06835	-0.49887	-0.37385	0.99976	0.96433	0.92967	0.96424	0.32225	0.28516	0.99995	-0.01923	-0.30386	0.99993	0.46691	0.53646	0.99807	1.46321	1.24716	0.86983	0.82113	0.63416	0.99517	0.47964	0.06995	1	0.96579	0.87338	0.97456	-0.64208
ENST00000216774	0.97525	0.44562	0.75444	0.34802	1.2832	0.85948	0.40754	0.48304	0.99906	-0.04407	0.10887	1	-0.15861	-0.56011	0.99782	-0.15867	-0.37146	0.99979	-0.23148	-0.87621	0.97599	0.05952	-0.68994	0.99311	-0.39209	-1.15887	0.90898	-0.50662	-1.79027	0.55537	-0.50668	-1.60721	0.67777	-0.5795	-2.10649	0.35034	-0.45161	-0.37888	0.99977	-0.56614	-0.97564	0.95903	-0.5662	-0.80567	0.98436	-0.63902	-1.26206	0.86884	-0.11453
ENST00000216780	0.6115	0.7206	0.89887	0.7928	0.71762	0.98981	0.94692	1.50256	0.73982	0.85507	0.41634	0.99949	0.92995	1.2927	0.84624	0.96495	1.21342	0.88077	-0.26901	0.12491	1	0.15412	0.82122	0.97861	0.06227	-0.27633	0.99995	0.13715	0.57666	0.9966	0.17215	0.5147	0.99823	-1.06181	-0.58179	0.99675	-0.09185	-1.06182	0.92952	-0.01697	-0.26934	0.99995	0.01803	-0.31027	0.9999	-1.21593	-1.36439	0.8129	0.07488
ENST00000216797	1.9469	0.08	0.34184	0.75892	2.24793	0.27392	-0.10746	-0.72529	0.99099	0.31505	1.08119	0.93329	0.10212	0.01721	1	-0.089	-0.37729	0.99977	0.43463	1.03275	0.94611	-0.86638	-2.80105	0.07911	-0.44387	-1.13561	0.91645	-0.6568	-2.13264	0.3371	-0.84792	-2.53609	0.15064	-0.3243	-1.12988	0.91836	0.42251	1.70785	0.6113	0.20959	0.70809	0.99206	0.01847	0.34997	0.99985	0.54209	1.65173	0.64869	-0.21292
ENST00000216799	1.1398	0.34471	0.68159	0.15964	1.09345	0.92975	0.11851	0.62071	0.99612	0.31187	2.15454	0.32385	0.07002	0.2646	0.99997	0.23326	1.53613	0.72278	0.06759	0.37563	0.99978	-0.04114	-0.39402	0.99971	0.15223	1.06422	0.9379	-0.08962	-0.78203	0.98653	0.07362	0.47463	0.99914	-0.09205	-0.67832	0.9937	0.19336	1.38583	0.80908	-0.04848	-0.35095	0.99985	0.11475	0.82749	0.98196	-0.05092	-0.25087	0.99998	-0.24184
ENST00000216802	1.00062	0.42903	0.74407	-0.16863	-0.83871	0.98017	-0.25549	-0.79326	0.98513	0.34768	0.75906	0.98807	0.2842	0.34649	0.99985	-0.25805	-1.26747	0.86512	0.27073	0.12846	1	-0.08686	-0.00324	1	0.51632	1.55033	0.71365	0.45284	1.13669	0.91466	-0.08941	-0.44527	0.99938	0.43937	0.91761	0.96883	0.60318	1.47233	0.76017	0.5397	1.0804	0.93212	-0.00255	-0.41693	0.99958	0.52623	0.87338	0.97564	-0.06348
ENST00000216807	2.05726	0.06448	0.30556	-0.81961	-2.66293	0.12602	-0.23142	-0.61934	0.99589	-0.89622	-2.93627	0.06625	-0.52678	-1.51108	0.73702	-0.40179	-1.37399	0.8131	-0.36255	-1.25367	0.86966	0.58819	1.86348	0.5116	-0.07661	-0.30893	0.99993	0.29284	1.08183	0.93122	0.41782	1.1739	0.90151	0.45707	1.31126	0.84446	-0.6648	-2.12491	0.35098	-0.29535	-0.80983	0.98301	-0.17036	-0.69245	0.99256	-0.13112	-0.57767	0.99723	0.36945
ENST00000216832	9.74186	0	0	0.228	3.31168	0.01641	-0.10183	-1.33939	0.83333	0.03302	0.61246	0.99644	0.26512	3.53163	0.00772	-0.1167	-1.45516	0.77135	-0.1906	-2.12293	0.3393	-0.32983	-4.41336	0.00022	-0.19499	-2.62325	0.11954	0.03712	0.33207	0.99989	-0.3447	-4.61759	8e-05	-0.4186	-5.30324	0	0.13485	1.87793	0.49529	0.36695	4.58856	0.0001	-0.01487	-0.06561	1	-0.08877	-0.68153	0.99362	0.2321
ENST00000216840	0.44016	0.85069	0.951	-0.22075	-0.53877	0.99809	0.31576	0.71179	0.99119	-0.10285	-0.22377	0.99999	-0.37111	-0.78746	0.98518	-0.06306	-0.13364	1	0.11622	0.26651	0.99997	0.5365	1.20583	0.88829	0.1179	0.30486	0.99993	-0.15036	-0.25722	0.99997	0.15769	0.38356	0.99973	0.33697	0.78197	0.98572	-0.4186	-0.90621	0.96969	-0.68687	-1.42567	0.78524	-0.37881	-0.81049	0.98274	-0.19954	-0.44004	0.99939	-0.26826
ENST00000216877	0.965	0.4528	0.75967	0.55881	1.09247	0.92988	-0.38376	-0.71926	0.99138	-0.47232	-0.67974	0.99364	0.05977	0.78904	0.98589	0.36772	0.48454	0.99903	-0.36688	-0.32887	0.9999	-0.94257	-1.72818	0.59774	-1.03113	-1.73217	0.59509	-0.49904	-0.30129	0.99994	-0.19109	-0.56059	0.99778	-0.92569	-1.38969	0.80704	-0.08856	0.07625	1	0.44353	1.44498	0.7768	0.75148	1.1328	0.91758	0.01688	0.39767	0.99969	0.53209
ENST00000216879	0.6359	0.70123	0.89025	-0.0133	-0.08635	1	-0.09362	-0.47973	0.99908	0.07807	0.64718	0.99509	-0.01108	0.0004	1	-0.0891	-0.48409	0.99903	0.13646	1.11264	0.92377	-0.08031	-0.39397	0.9997	0.09137	0.72226	0.99111	0.00223	0.08318	1	-0.0758	-0.39491	0.9997	0.14977	1.18377	0.89967	0.17168	1.07202	0.93563	0.08254	0.46228	0.99926	0.00451	0.01112	1	0.23008	1.50606	0.74101	-0.08915
ENST00000216923	0.2529	0.95729	0.98869	-0.22116	0.00765	1	-0.2596	-0.42307	0.99954	-0.41798	-0.67034	0.9939	-0.50821	-0.79528	0.98488	-0.01165	-0.18341	1	0.01205	0.14045	1	-0.03844	-0.43031	0.99949	-0.19682	-0.6781	0.99351	-0.28705	-0.80299	0.9841	0.20951	-0.19073	1	0.23321	0.13318	1	-0.15838	-0.20516	0.99999	-0.2486	-0.32658	0.9999	0.24796	0.23228	0.99999	0.27166	0.53834	0.99818	-0.09023
ENST00000216962	5.38184	7e-05	0.00233	0.2544	3.01429	0.04207	0.23831	2.6202	0.12099	0.2087	2.51439	0.15514	0.56567	5.51167	0	0.11039	1.80816	0.54276	0.23045	2.78336	0.07997	-0.01609	-0.19565	1	-0.04571	-0.45668	0.99932	0.31127	2.61011	0.12446	-0.14401	-1.11323	0.92415	-0.02395	-0.14379	1	-0.02962	-0.23612	0.99999	0.32736	2.65666	0.11106	-0.12792	-0.85589	0.97873	-0.00786	0.0558	1	0.35697
ENST00000216968	4.70891	0.00028	0.00685	0.31114	2.14825	0.32885	0.23436	1.71223	0.60865	0.21207	1.48838	0.75152	0.61773	3.61899	0.00716	0.62061	3.75375	0.00429	0.70105	4.20141	0.0008	-0.07678	-0.30703	0.99993	-0.09907	-0.63163	0.99568	0.30659	1.54633	0.7163	0.30947	1.66985	0.63705	0.38992	2.1018	0.35663	-0.02229	-0.29293	0.99995	0.38337	1.76752	0.57199	0.38625	1.88533	0.49281	0.46669	2.2991	0.25051	0.40566
ENST00000217109	1.42442	0.21218	0.55453	0.03641	0.18914	1	-0.11865	-1.75129	0.58184	0.0607	0.72144	0.99124	0.00593	0.18316	1	-0.06867	-1.22256	0.8852	-0.00067	-0.20926	0.99999	-0.15506	-1.90764	0.47643	0.02429	0.52716	0.99844	-0.03048	4e-05	1	-0.10508	-1.38771	0.80828	-0.03708	-0.38901	0.99973	0.17936	2.37853	0.21052	0.12458	1.85218	0.51363	0.04998	0.54367	0.99815	0.11798	1.49612	0.74713	-0.05477
ENST00000217131	5.47789	6e-05	0.00199	0.11724	1.7332	0.5937	0.09638	1.34188	0.83206	0.18353	2.53716	0.14683	0.31562	3.81942	0.00267	0.30004	3.74296	0.00356	0.39495	4.72796	5e-05	-0.02085	-0.2785	0.99996	0.06629	0.81628	0.98335	0.19838	2.12699	0.33729	0.1828	2.04891	0.38421	0.27771	3.02806	0.04014	0.08715	1.04346	0.94379	0.21924	2.27843	0.25526	0.20365	2.2038	0.29394	0.29857	3.12968	0.02952	0.13209
ENST00000217159	0.45863	0.83764	0.94597	-0.29539	-0.78244	0.98488	0.09749	-0.20538	0.99999	0.01397	-0.07253	1	-0.28919	-0.31238	0.99991	0.03016	0.05326	1	0.70726	0.96085	0.95736	0.39288	0.51569	0.99839	0.30936	0.6933	0.99192	0.0062	0.45505	0.99921	0.32555	0.79884	0.98322	1.00265	1.68608	0.63132	-0.08352	0.13449	1	-0.38668	-0.08681	1	-0.06733	0.24624	0.99998	0.60977	1.09048	0.92431	-0.30316
ENST00000217162	1.02795	0.41146	0.73154	0.41654	0.58451	0.99693	-0.08792	-0.78039	0.9858	-0.01984	-0.18139	1	0.72892	1.64124	0.65764	0.0094	-0.3142	0.99991	0.06067	-0.10798	1	-0.50446	-1.30464	0.84584	-0.43638	-0.74931	0.98833	0.31238	1.05096	0.93731	-0.40714	-0.86069	0.97633	-0.35587	-0.66193	0.99397	0.06808	0.5987	0.99656	0.81684	2.26975	0.28675	0.09732	0.45028	0.99931	0.14859	0.64515	0.99482	0.74875
ENST00000217173	0.56741	0.75557	0.91463	-0.19155	-0.78007	0.98674	-0.02455	0.177	1	-0.2211	-0.9227	0.96877	-0.29171	-1.18857	0.89818	-0.24969	-0.95267	0.96347	-0.29072	-1.172	0.9043	0.167	0.90304	0.97193	-0.02955	-0.15114	1	-0.10016	-0.42602	0.99954	-0.05814	-0.19169	1	-0.09917	-0.40332	0.99966	-0.19655	-1.03519	0.94553	-0.26716	-1.28263	0.85958	-0.22514	-1.06241	0.93854	-0.26617	-1.2675	0.86634	-0.07062
ENST00000217182	1.1453	0.34152	0.6789	-0.12394	-1.17447	0.90388	0.05493	0.3106	0.99993	-0.00723	0.02363	1	-0.148	-1.36779	0.81908	-0.11543	-1.3082	0.84842	0.04075	0.31907	0.99992	0.17887	1.39099	0.80694	0.11671	1.16645	0.90674	-0.02407	-0.22764	0.99999	0.00851	-0.16822	1	0.16468	1.44416	0.77768	-0.06216	-0.28179	0.99996	-0.20293	-1.56602	0.70418	-0.17036	-1.51039	0.73874	-0.01418	-0.00383	1	-0.14077
ENST00000217195	2.29708	0.03901	0.23017	0.59456	0.70099	0.99198	1.71166	1.60358	0.68098	1.65522	2.25298	0.29367	2.4207	2.76747	0.12666	2.42754	2.65281	0.15189	0.50046	0.51953	0.99847	1.1171	0.96871	0.95702	1.06066	1.54634	0.71562	1.82614	2.08547	0.39521	1.83298	1.99407	0.44349	-0.0941	-0.15696	1	-0.05644	0.45019	0.99924	0.70904	0.98591	0.9511	0.71588	0.93033	0.96313	-1.21121	-1.08955	0.92678	0.76548
ENST00000217233	3.94711	0.00136	0.02335	0.46764	2.31853	0.25693	0.41396	2.35439	0.24055	0.53097	2.40355	0.22027	0.69757	3.21678	0.03739	0.76115	3.26654	0.03164	-0.07431	-0.19277	1	-0.05368	0.18093	1	0.06332	0.12376	1	0.22993	0.9644	0.95849	0.29351	1.05077	0.93847	-0.54195	-2.41975	0.21226	0.117	-0.06144	1	0.28361	0.73465	0.98943	0.34719	0.81963	0.98154	-0.48827	-2.45371	0.19895	0.16661
ENST00000217244	0.74709	0.61302	0.8488	-0.17606	0.73203	0.98836	-0.53212	-0.58454	0.99658	-0.81508	-0.7055	0.99065	0.22675	0.67739	0.99185	0.29724	0.02369	1	-1.13057	-0.90858	0.96731	-0.35606	-1.29421	0.8469	-0.63902	-1.45378	0.76726	0.40281	-0.02721	1	0.4733	-0.66192	0.99291	-0.95451	-1.66205	0.64588	-0.28296	-0.08422	1	0.75887	1.21877	0.87701	0.82935	0.57137	0.99688	-0.59845	-0.28195	0.99995	1.04183
ENST00000217246	0.2734	0.9483	0.98606	-0.57382	-1.18561	0.89406	-0.26571	-0.51182	0.99847	-0.28707	-0.71433	0.99054	-0.21693	-0.37999	0.99971	-0.25929	-0.65725	0.99398	0.27594	-0.18774	1	0.30811	0.5973	0.99646	0.28675	0.44534	0.99931	0.35689	0.77173	0.98595	0.31453	0.47965	0.99896	0.84976	0.9243	0.96539	-0.02136	-0.16844	1	0.04878	0.14181	1	0.00642	-0.12475	1	0.54164	0.3073	0.99992	0.07014
ENST00000217315	1.48955	0.18732	0.52316	-0.05587	-0.46971	0.99883	-0.56355	-0.92	0.96277	-0.47043	-0.45188	0.99909	-0.96351	-1.92996	0.49424	1.21619	0.57174	0.99602	-1.70198	-2.18893	0.34837	-0.50768	-0.47577	0.99882	-0.41457	0.01494	1	-0.90764	-1.45982	0.76257	1.27206	1.03071	0.93214	-1.64612	-1.69462	0.62737	0.09312	0.48674	0.9987	-0.39996	-0.90233	0.96729	1.77974	1.43689	0.77191	-1.13843	-1.09509	0.92314	-0.49308
ENST00000217381	7.98497	0	3e-05	-0.47263	-5.2527	0	0.00631	-0.24509	0.99998	-0.2803	-2.95757	0.04874	-0.38046	-3.99553	0.00127	-0.14768	-1.63643	0.65856	-0.0061	-0.4437	0.99943	0.47894	4.58728	9e-05	0.19233	2.20247	0.29405	0.09217	1.09012	0.93123	0.32494	3.39701	0.01213	0.46653	4.59515	9e-05	-0.28661	-2.48402	0.16506	-0.38677	-3.45378	0.00997	-0.154	-1.27935	0.86161	-0.01241	-0.17591	1	-0.10016
ENST00000217402	1.05871	0.39123	0.7178	-0.04867	-0.97138	0.96013	-0.12984	-2.18277	0.30501	-0.10612	-1.62303	0.66738	-0.09311	-1.53268	0.72506	-0.10283	-1.83935	0.52128	-0.10547	-1.5855	0.69175	-0.08117	-1.25249	0.87327	-0.05745	-0.65462	0.99488	-0.04444	-0.58187	0.99733	-0.05416	-0.88518	0.97485	-0.0568	-0.62882	0.99589	0.02372	0.62134	0.99615	0.03673	0.67012	0.99418	0.02701	0.3828	0.99976	0.02436	0.63208	0.99577	0.01301
ENST00000217407	4.63488	0.00033	0.00792	-0.97193	-1.68996	0.62519	0.82718	1.21292	0.88449	-0.16242	-0.22917	0.99999	0.65213	1.30083	0.84701	2.01564	3.04944	0.07332	1.39749	2.06453	0.39743	1.79911	2.72327	0.1186	0.80951	1.42496	0.78631	1.62406	2.91036	0.07817	2.98756	4.5455	0.00228	2.36942	3.61077	0.01511	-0.9896	-1.40252	0.7969	-0.17505	0.01734	1	1.18846	1.72446	0.60844	0.57031	0.77306	0.98566	0.81455
ENST00000217426	0.90251	0.49613	0.7871	-0.39455	-1.31622	0.84441	-0.28988	-0.68177	0.99358	-0.55316	-1.96378	0.4387	-0.44663	-1.84841	0.51556	-0.32525	-0.99317	0.9555	-0.26947	-1.31468	0.84516	0.10467	0.55997	0.99783	-0.15861	-0.65857	0.99469	-0.05208	-0.57304	0.99753	0.06929	0.28717	0.99995	0.12507	-0.03938	1	-0.26329	-1.17499	0.90351	-0.15675	-1.08455	0.93266	-0.03538	-0.27474	0.99996	0.0204	-0.58129	0.99733	0.10653
ENST00000217446	0.99748	0.4311	0.7451	-0.12279	-2.17957	0.30904	-0.10336	-1.29178	0.85554	-0.0717	-1.33779	0.83372	-0.11394	-1.50911	0.73929	-0.10128	-1.53902	0.72102	-0.06442	-0.62667	0.99593	0.01943	0.74299	0.98976	0.05109	0.79875	0.98502	0.00884	0.59794	0.99685	0.02151	0.56656	0.99767	0.05836	1.4804	0.75644	0.03166	0.01924	1	-0.01059	-0.16007	1	0.00208	-0.18866	1	0.03893	0.6663	0.9943	-0.04225
ENST00000217455	0.6541	0.68672	0.88367	0.19377	0.6843	0.99329	0.2402	0.83595	0.98074	0.05733	0.41748	0.99958	-0.2625	-0.8512	0.97895	0.16311	0.34699	0.99986	0.11615	0.71549	0.99151	0.04643	0.2006	0.99999	-0.13644	-0.25475	0.99998	-0.45627	-1.49626	0.74666	-0.03066	-0.30713	0.99993	-0.07762	0.04286	1	-0.18287	-0.4351	0.99947	-0.5027	-1.58491	0.69216	-0.07709	-0.48046	0.99906	-0.12405	-0.15792	1	-0.31983
ENST00000217456	11.7938	0	0	0.36471	5.35614	0	0.07299	1.36828	0.81859	0.41268	5.82589	0	0.51716	6.75695	0	0.26518	3.82903	0.00267	0.21933	3.3932	0.01286	-0.29172	-3.63983	0.00548	0.04797	0.54416	0.99815	0.15245	1.60685	0.67801	-0.09953	-1.34289	0.83136	-0.14538	-1.79889	0.54931	0.33969	4.10058	0.00092	0.44417	5.03443	1e-05	0.19219	2.26189	0.26435	0.14634	1.8523	0.51304	0.10448
ENST00000217515	1.74124	0.11863	0.41872	-0.19252	-2.58494	0.13108	-0.08133	-1.27971	0.86137	-0.14464	-2.00052	0.41457	-0.13377	-2.07827	0.36608	-0.03835	-0.58463	0.99725	-0.03996	-0.67286	0.99404	0.11118	1.1317	0.9184	0.04787	0.54278	0.99819	0.05875	0.41917	0.99959	0.15417	1.89428	0.48431	0.15256	1.82136	0.53362	-0.06331	-0.60763	0.99659	-0.05243	-0.70509	0.99232	0.04299	0.68534	0.99342	0.04138	0.60951	0.99654	0.01088
ENST00000217652	3.09252	0.0079	0.08318	0.26246	1.82909	0.5282	-0.15874	-1.07746	0.93483	0.46758	2.57279	0.1344	0.33218	1.82149	0.53338	-0.00147	-0.00285	1	0.11231	0.54194	0.99821	-0.4212	-2.77206	0.08146	0.20511	0.77413	0.98741	0.06972	0.05693	1	-0.26393	-1.75927	0.57582	-0.15015	-1.2199	0.88669	0.62632	3.4485	0.01016	0.49092	2.73605	0.08954	0.15727	1.034	0.94624	0.27105	1.54294	0.7187	-0.1354
ENST00000217740	7.29534	0	0.0001	0.76939	3.75637	0.00422	0.54604	2.12983	0.33916	0.89123	4.13359	0.00107	1.30099	5.72981	0	0.42751	1.92213	0.46772	0.27209	1.46587	0.76478	-0.22335	-1.33866	0.83268	0.12184	0.46648	0.99921	0.53159	2.19487	0.30703	-0.34189	-1.69531	0.6201	-0.49731	-2.19825	0.30136	0.34519	1.74587	0.58647	0.75495	3.34016	0.01878	-0.11853	-0.28401	0.99996	-0.27396	-0.73169	0.99047	0.40976
ENST00000217893	0.33802	0.91534	0.97406	-0.04309	-0.107	1	-0.40004	-1.22727	0.88215	-0.08152	-0.16665	1	-0.22289	-0.57838	0.99729	-0.0237	-0.37375	0.99978	-0.05662	-0.22512	0.99999	-0.35695	-1.11912	0.92102	-0.03843	-0.06095	1	-0.1798	-0.47122	0.99915	0.0194	-0.26898	0.99997	-0.01353	-0.1205	1	0.31853	1.04309	0.94271	0.17715	0.64094	0.99525	0.37635	0.8227	0.98218	0.34342	0.97505	0.95845	-0.14138
ENST00000217901	2.41908	0.0314	0.20271	0.14906	1.80081	0.54762	-0.11019	-1.22858	0.88314	0.15524	1.97701	0.42969	0.06428	0.64607	0.99523	0.01092	-0.03763	1	-0.01735	-0.19352	1	-0.25925	-2.89142	0.05924	0.00618	0.19968	0.99999	-0.08478	-1.08487	0.93266	-0.13814	-1.76099	0.57476	-0.16641	-1.92393	0.46452	0.26543	3.0375	0.03886	0.17447	1.78287	0.55985	0.12111	1.14472	0.91412	0.09284	1.00507	0.95298	-0.09097
ENST00000217909	1.06329	0.38928	0.71646	0.24621	0.41753	0.99956	0.46068	1.00341	0.95135	1.28522	2.28921	0.27124	0.2281	0.5105	0.99862	0.45152	0.99292	0.9538	0.98784	1.38474	0.80743	0.21447	0.60875	0.99629	1.03901	1.87184	0.50917	-0.01811	0.10323	1	0.20531	0.58631	0.99699	0.74163	0.98659	0.95467	0.82454	1.17863	0.89833	-0.23258	-0.49824	0.99878	-0.00916	-0.03753	1	0.52716	0.35647	0.99982	-1.05712
ENST00000217939	1.75349	0.11615	0.41393	-0.3499	-1.46539	0.76513	-0.12179	-0.09501	1	0.12347	0.79189	0.98561	0.39718	1.37779	0.81316	0.16661	0.89525	0.97308	0.05793	0.57762	0.99739	0.22811	1.27638	0.86238	0.47337	2.21221	0.29221	0.74708	2.75988	0.08844	0.51651	2.29376	0.25036	0.40783	1.99267	0.42129	0.24526	0.83775	0.98076	0.51896	1.39446	0.80442	0.2884	0.93626	0.96638	0.17972	0.6375	0.99551	0.2737
ENST00000217958	0.65157	0.68874	0.88459	0.05464	0.99867	0.95412	0.10637	1.18093	0.90106	-0.04008	-0.05742	1	-0.01282	0.09098	1	0.08228	1.26577	0.86715	0.02013	0.72798	0.99082	0.05172	0.24689	0.99998	-0.09472	-1.03193	0.94637	-0.06746	-0.86603	0.97727	0.02764	0.2947	0.99995	-0.03451	-0.24312	0.99998	-0.14645	-1.21009	0.89005	-0.11918	-1.05252	0.94114	-0.02408	0.03639	1	-0.08623	-0.46965	0.99919	0.02727
ENST00000217961	2.20799	0.04673	0.2558	0.48166	2.18801	0.38013	0.9005	2.7432	0.19573	1.40756	4.15009	0.03282	0.49776	2.43852	0.27978	0.81354	2.7686	0.18536	1.48748	3.66497	0.05998	0.41884	0.67071	0.99054	0.9259	1.90245	0.53485	0.0161	0.28503	0.99992	0.33188	0.67556	0.99029	1.00582	1.5151	0.73159	0.50706	1.09663	0.90943	-0.40274	-0.39133	0.99949	-0.08696	-0.00396	1	0.58698	0.77662	0.97988	-0.9098
ENST00000217971	2.03936	0.06674	0.31098	0.05952	1.17678	0.90273	0.09411	1.34152	0.83204	0.00399	0.49971	0.99886	0.27649	2.90997	0.05768	0.12574	1.89611	0.48367	0.17086	2.2575	0.26672	0.03458	0.23757	0.99999	-0.05553	-0.65646	0.99476	0.21696	1.76741	0.57085	0.06622	0.74953	0.98931	0.11134	1.10626	0.92616	-0.09011	-0.85171	0.9792	0.18238	1.43976	0.77989	0.03163	0.4751	0.99914	0.07675	0.81057	0.98388	0.27249
ENST00000218004	0.8384	0.54261	0.81243	0.6965	1.47794	0.74998	-0.85403	-1.27973	0.84886	-0.94586	-0.56053	0.9969	-0.67847	-0.8504	0.97265	-0.55563	-0.37299	0.99968	0.22214	0.02641	1	-1.55052	-2.78478	0.19189	-1.64235	-2.10219	0.43363	-1.37497	-2.3746	0.32911	-1.25213	-1.81673	0.57364	-0.47436	-1.36445	0.80353	-0.09183	0.74527	0.98718	0.17556	0.44945	0.99913	0.2984	0.8725	0.9717	1.07617	1.2576	0.85674	0.26739
ENST00000218008	2.36342	0.03511	0.21635	-0.14573	-0.43285	0.9995	-0.08819	-0.34775	0.99986	0.91511	2.30253	0.24495	0.30293	1.23446	0.88049	-0.16225	-0.87345	0.9764	-0.20812	-0.63933	0.99548	0.05754	0.05555	1	1.06084	2.6767	0.10659	0.44866	1.6311	0.66218	-0.01653	-0.45402	0.99934	-0.0624	-0.2145	0.99999	1.0033	2.47964	0.16908	0.39112	1.48242	0.75532	-0.07407	-0.47845	0.99911	-0.11994	-0.25468	0.99998	-0.61218
ENST00000218056	0.12692	0.99277	0.99841	0.08956	0.47665	0.99913	0.07042	0.4506	0.99937	0.10368	0.44206	0.99943	0.04087	0.2503	0.99998	0.00242	-0.16741	1	0.07772	0.43378	0.99949	-0.01914	0.00432	1	0.01412	-0.02679	1	-0.04869	-0.20819	0.99999	-0.08714	-0.62097	0.99615	-0.01184	-0.02882	1	0.03326	-0.02946	1	-0.02955	-0.20032	0.99999	-0.068	-0.58843	0.99714	0.0073	-0.03136	1	-0.06281
ENST00000218068	1.01057	0.42265	0.7397	0.65898	2.07675	0.4146	0.82871	1.82171	0.5582	0.40247	1.14383	0.90474	0.6376	1.37082	0.8073	0.97447	2.18357	0.36362	0.1886	0.78131	0.9842	0.16973	-0.09501	1	-0.2565	-0.8857	0.968	-0.02137	-0.64659	0.99307	0.3155	0.21316	0.99999	-0.47038	-1.20922	0.87927	-0.42623	-0.72896	0.98745	-0.19111	-0.50801	0.99808	0.14576	0.28896	0.99992	-0.64011	-1.0362	0.93541	0.23513
ENST00000218089	1.27939	0.27299	0.61802	0.17045	-0.1529	1	-0.29947	-0.76624	0.98778	1.05024	0.75612	0.98841	0.97346	1.04082	0.943	1.24268	1.49168	0.74901	1.28185	1.25931	0.8683	-0.46992	-0.59456	0.99689	0.87979	0.8707	0.97596	0.80301	1.14805	0.91102	1.07223	1.58329	0.69321	1.1114	1.35756	0.82226	1.34972	1.41558	0.79228	1.27293	1.68662	0.62648	1.54216	2.09917	0.36135	1.58133	1.87236	0.50357	-0.07679
ENST00000218104	3.58684	0.00287	0.04037	-0.54203	-4.06885	0.001	-0.22669	-1.57482	0.69858	-0.29052	-1.89841	0.48183	-0.45016	-3.24677	0.02061	-0.46561	-3.1797	0.02542	-0.29247	-1.89759	0.48235	0.31533	2.21099	0.29033	0.2515	2.10409	0.35087	0.09187	0.69847	0.99269	0.07642	0.76568	0.98808	0.24956	2.05055	0.3833	-0.06383	-0.21832	0.99999	-0.22346	-1.49909	0.74547	-0.23891	-1.43563	0.78238	-0.06578	-0.24272	0.99998	-0.15963
ENST00000218147	2.51658	0.02562	0.18016	-0.06793	-0.53526	0.9971	-0.08992	-0.26035	0.99995	-1.07091	-2.43592	0.28472	-0.83371	-2.23053	0.37103	-1.08024	-2.46203	0.2713	0.91353	1.56772	0.70592	-0.02199	0.23226	0.99998	-1.00299	-1.88246	0.52948	-0.76578	-1.68196	0.64154	-1.01232	-1.92567	0.50426	0.98145	2.0659	0.46286	-0.981	-1.98083	0.47947	-0.74379	-1.79403	0.58098	-0.99032	-2.01638	0.45855	1.00345	1.69419	0.64163	0.23721
ENST00000218176	0.18877	0.97936	0.99472	0.30576	0.35058	0.99982	0.06058	0.38264	0.9997	0.31268	0.86786	0.97372	0.39046	0.52036	0.99819	0.00257	0.60578	0.99605	-0.0363	-0.05705	1	-0.24518	0.0492	1	0.00692	0.51471	0.99831	0.0847	0.17847	1	-0.30319	0.25845	0.99997	-0.34207	-0.39391	0.99964	0.2521	0.44139	0.9993	0.32988	0.12228	1	-0.05801	0.1976	0.99999	-0.09688	-0.4239	0.99947	0.07778
ENST00000218200	0.53535	0.78049	0.92371	0.25246	0.53025	0.99799	0.11129	-0.10188	1	-0.18604	-0.42091	0.99947	0.43702	0.10281	1	0.60498	1.14523	0.90525	-0.30083	-0.53322	0.99804	-0.14117	-0.58894	0.99639	-0.4385	-0.93723	0.96151	0.18456	-0.40393	0.99954	0.35253	0.63489	0.99446	-0.55329	-1.04193	0.9381	-0.29733	-0.28663	0.99994	0.32573	0.19253	0.99999	0.4937	1.15686	0.90093	-0.41212	-0.39261	0.99965	0.62306
ENST00000218224	0.33362	0.91804	0.97476	-0.09596	-0.98636	0.94918	-0.12954	-0.63168	0.99449	0.11804	0.04139	1	-0.14482	-0.48291	0.9987	0.10356	-0.0771	1	0.2151	0.38715	0.99963	-0.03358	0.28859	0.99993	0.214	1.00102	0.94466	-0.04886	0.48172	0.99871	0.19952	0.8567	0.97359	0.31106	1.31511	0.83389	0.24759	0.65451	0.99314	-0.01528	0.16756	1	0.2331	0.52809	0.99791	0.34464	0.96401	0.95389	-0.26287
ENST00000218230	2.21736	0.04585	0.25281	-0.35743	-0.84242	0.97597	1.0855	1.67956	0.64443	-0.12205	-0.66059	0.99287	0.43674	0.79856	0.97965	1.44883	2.54199	0.26348	1.26493	2.34801	0.32438	1.44293	2.50636	0.26503	0.23538	0.16125	1	0.79416	1.63976	0.66397	1.80625	3.42059	0.08647	1.62235	3.20439	0.10716	-1.20755	-2.27758	0.35154	-0.64877	-0.87881	0.96497	0.36333	0.72151	0.98551	0.17943	0.58884	0.99488	0.55878
ENST00000218340	1.2905	0.26789	0.61283	-0.24592	-1.32	0.84048	-0.12356	-0.47135	0.99913	-0.02589	-0.09857	1	0.10624	0.68469	0.99302	0.11618	0.92171	0.96785	-0.19346	-1.04102	0.94275	0.12236	0.76109	0.98789	0.22003	1.19335	0.89449	0.35216	1.95281	0.45398	0.3621	2.17702	0.32058	0.05246	0.23916	0.99998	0.09767	0.37025	0.99978	0.22981	1.09814	0.92648	0.23974	1.31724	0.84173	-0.0699	-0.51714	0.99854	0.13213
ENST00000218348	0.56475	0.75765	0.91529	-0.10424	-0.26733	0.99997	0.11328	0.49278	0.99895	-0.0693	-0.18402	1	0.46836	0.85888	0.97832	-0.23837	-0.86315	0.97781	-0.02299	0.13831	1	0.21752	0.73675	0.99027	0.03493	0.07842	1	0.5726	1.1002	0.92804	-0.13414	-0.59827	0.99687	0.08125	0.39519	0.9997	-0.18259	-0.65351	0.9949	0.35508	0.34353	0.99987	-0.35166	-1.27869	0.86173	-0.13627	-0.3494	0.99986	0.53767
ENST00000218364	0.49239	0.81301	0.9368	-0.09639	0.12552	1	-0.51236	-1.03604	0.94563	-0.52058	-1.20231	0.89341	-0.11951	-0.36737	0.99981	-0.40396	-0.69149	0.99308	-0.37436	-0.5617	0.9978	-0.41597	-1.15424	0.91083	-0.42418	-1.32502	0.84027	-0.02312	-0.48777	0.99901	-0.30757	-0.81335	0.98365	-0.27797	-0.68471	0.99344	-0.00821	-0.1147	1	0.39285	0.64832	0.99513	0.1084	0.35575	0.99984	0.138	0.48751	0.99901	0.40107
ENST00000218388	1.85349	0.09604	0.37507	0.22589	1.28347	0.85919	-0.11996	0.16665	1	0.45352	2.22554	0.2851	0.58888	2.60752	0.12823	0.29334	1.50657	0.74082	0.26693	1.57039	0.70137	-0.34584	-1.04768	0.94237	0.22763	0.95604	0.9627	0.36299	1.37168	0.81632	0.06745	0.25757	0.99998	0.04104	0.3145	0.99992	0.57347	1.94805	0.45027	0.70883	2.32365	0.23678	0.41329	1.26754	0.8663	0.38689	1.32718	0.83886	0.13536
ENST00000218432	1.46179	0.19845	0.53774	-0.14586	-0.50967	0.99862	-0.41077	-1.63409	0.66114	0.14446	0.82219	0.98164	-0.34186	-1.30719	0.84592	0.12492	0.44679	0.99935	-0.12666	-0.56526	0.99755	-0.26491	-1.14278	0.91215	0.29032	1.31247	0.84321	-0.196	-0.79825	0.98425	0.27078	0.92662	0.96665	0.0192	-0.07098	1	0.55523	2.3742	0.22738	0.0689	0.36772	0.99979	0.53568	1.97791	0.43865	0.28411	1.04301	0.94189	-0.48633
ENST00000218439	1.79964	0.10469	0.39234	-0.44545	-1.50968	0.73884	-0.6642	-2.08338	0.36563	-0.08714	-0.31561	0.99992	-0.007	-0.1132	1	-0.72129	-2.35641	0.22146	-0.29695	-0.98161	0.9576	-0.21875	-0.65163	0.99493	0.35831	1.15969	0.90835	0.43845	1.3338	0.83531	-0.27584	-0.88092	0.97521	0.1485	0.49116	0.99895	0.57706	1.7384	0.59088	0.65719	1.89461	0.48595	-0.0571	-0.19543	1	0.36724	1.10203	0.9272	0.08014
ENST00000218516	0.77115	0.59442	0.83905	0.29553	0.9823	0.95395	-0.30681	-0.94148	0.96298	0.33033	0.41704	0.99952	0.13936	-0.09149	1	0.07069	0.3417	0.99985	0.75724	0.96544	0.95726	-0.60235	-1.85183	0.52501	0.03479	-0.53812	0.99795	-0.15617	-1.03592	0.9407	-0.22484	-0.60129	0.99628	0.46171	0.0434	1	0.63714	1.30305	0.8455	0.44618	0.82178	0.98088	0.37751	1.22221	0.88091	1.06405	1.79193	0.56358	-0.19096
ENST00000218652	0.80697	0.56685	0.82506	0.53922	0.63739	0.99553	0.59907	0.36099	0.99982	0.31733	0.55308	0.99797	-0.34826	-0.71429	0.99173	0.68121	0.69983	0.99257	-0.06505	-0.89897	0.97268	0.05985	-0.21839	0.99999	-0.22189	-0.08482	1	-0.88748	-1.29618	0.85354	0.14199	0.08556	1	-0.60426	-1.46502	0.76544	-0.28174	0.14048	1	-0.94733	-0.97721	0.95868	0.08214	0.291	0.99995	-0.66411	-1.13762	0.91614	-0.66559
ENST00000218758	0.60157	0.72852	0.90216	-0.58149	-0.64123	0.99366	0.32239	1.29035	0.84049	-0.45632	-0.45814	0.99899	-0.60745	-0.80182	0.98	-0.67115	-0.53072	0.99777	-0.52813	-0.26205	0.99996	0.90389	1.89738	0.52267	0.12518	0.17447	1	-0.02596	-0.17529	1	-0.08965	0.08711	1	0.05336	0.35825	0.99977	-0.77871	-1.70634	0.62742	-0.92985	-2.02476	0.45741	-0.99354	-1.7461	0.60389	-0.85053	-1.50269	0.73855	-0.15114
ENST00000218789	1.45651	0.19888	0.5379	1.58717	1.18821	0.89196	1.13425	0.9007	0.96966	2.62722	2.42937	0.26401	2.37125	2.54789	0.21698	2.25602	1.90664	0.50214	1.91464	2.06008	0.40795	-0.45292	-0.20769	0.99999	1.04005	1.15643	0.896	0.78408	1.27134	0.85157	0.66884	0.74374	0.9868	0.32747	0.86659	0.97279	1.49296	1.31343	0.83367	1.23699	1.42358	0.78086	1.12176	0.9098	0.96548	0.78039	1.03379	0.93933	-0.25597
ENST00000218867	8.8655	0	1e-05	-0.53132	-6.77694	0	-0.37153	-4.42008	0.00021	-0.41265	-5.13493	1e-05	-0.39915	-4.96235	2e-05	-0.3837	-4.739	5e-05	-0.26588	-3.38202	0.01288	0.15979	1.9276	0.46197	0.11867	1.54553	0.71707	0.13217	1.60578	0.67865	0.14762	1.80692	0.54338	0.26544	3.16967	0.0258	-0.04112	-0.45275	0.99935	-0.02762	-0.36612	0.99981	-0.01217	-0.1707	1	0.10565	1.10503	0.92678	0.0135
ENST00000218981	2.562	0.02357	0.17075	0.25149	1.86003	0.51189	-0.21359	-1.23623	0.87837	-0.16523	-1.13444	0.91598	-0.01028	0.00072	1	-0.26891	-1.54787	0.71531	-0.04029	0.16889	1	-0.46508	-2.9542	0.05845	-0.41672	-2.92726	0.06307	-0.26177	-1.78561	0.56147	-0.5204	-3.31951	0.02079	-0.29178	-1.62412	0.66723	0.04836	0.15473	1	0.20331	1.19126	0.89586	-0.05532	-0.24316	0.99998	0.1733	1.35203	0.82555	0.15495
ENST00000219022	0.76006	0.60301	0.8437	-0.28385	-0.60436	0.99602	-0.48065	-0.61918	0.99552	-0.35411	-0.77213	0.98552	-0.44488	-0.57381	0.99701	-0.98017	-1.98085	0.44777	-0.28254	-0.17423	1	-0.1968	-0.04698	1	-0.07026	-0.17428	1	-0.16103	0.02315	1	-0.69632	-1.38484	0.80527	0.00131	0.41218	0.99954	0.12654	-0.11848	1	0.03577	0.06832	1	-0.49952	-1.26248	0.86349	0.19811	0.43685	0.99937	-0.09077
ENST00000219066	1.00037	0.42915	0.74408	0.45245	1.60283	0.681	0.04571	0.4278	0.9995	0.39672	1.56775	0.70287	0.34808	1.47398	0.7588	-0.07819	0.05628	1	0.08665	0.3847	0.99973	-0.40674	-1.07165	0.93395	-0.05573	-0.01159	1	-0.10438	-0.09307	1	-0.53065	-1.49651	0.74584	-0.36581	-1.1621	0.9055	0.35101	1.0466	0.94074	0.30237	0.96294	0.95992	-0.1239	-0.36269	0.99981	0.04094	-0.05361	1	-0.04864
ENST00000219069	0.84554	0.53764	0.80995	-0.10725	-0.30881	0.99993	-0.40615	-1.07004	0.93527	-0.51896	-1.76075	0.5775	-0.44566	-1.41327	0.79328	-0.32986	-1.17786	0.90079	-0.53372	-1.55286	0.71219	-0.29891	-0.7674	0.98745	-0.41171	-1.43242	0.78286	-0.33841	-1.09606	0.9276	-0.22261	-0.86542	0.97674	-0.42647	-1.23206	0.87996	-0.1128	-0.59794	0.99675	-0.03951	-0.29079	0.99995	0.07629	-0.07617	1	-0.12757	-0.4115	0.99961	0.0733
ENST00000219070	4.51467	0.00042	0.00948	-0.10392	-0.21741	0.99999	0.4203	2.34702	0.2221	0.23398	1.35435	0.82587	0.3545	2.18251	0.30533	0.64609	3.37217	0.01335	0.60653	3.44986	0.01022	0.52423	2.53837	0.1461	0.3379	1.55722	0.70974	0.45842	2.3814	0.20681	0.75001	3.56283	0.00685	0.71045	3.64873	0.005	-0.18632	-1.04588	0.94321	-0.0658	-0.2448	0.99998	0.22578	0.90208	0.97232	0.18623	0.95371	0.96353	0.12052
ENST00000219091	0.66002	0.68201	0.88186	-1.32476	-0.9931	0.95352	-0.7465	0.1606	1	-0.37233	0.04273	1	0.42323	0.7361	0.9892	-0.09517	-0.25758	0.99997	0.41415	0.54573	0.9979	0.57826	1.14291	0.91248	0.95243	1.04129	0.94222	1.74799	1.71577	0.60973	1.22959	0.68355	0.99308	1.73891	1.50784	0.73888	0.37417	-0.11896	1	1.16972	0.57074	0.99731	0.65132	-0.40862	0.99961	1.16065	0.38498	0.99972	0.79555
ENST00000219139	1.07162	0.38333	0.71186	-0.2766	-0.86725	0.9772	-0.36521	-1.21642	0.88777	-0.40854	-1.56933	0.70205	0.11887	-0.15378	1	0.17019	0.51867	0.99859	-0.29932	-1.09822	0.92861	-0.08861	-0.39581	0.9997	-0.13194	-0.71257	0.99184	0.39548	0.66327	0.99445	0.44679	1.33911	0.83322	-0.02271	-0.25302	0.99998	-0.04333	-0.28208	0.99996	0.48408	1.00561	0.95266	0.5354	1.65057	0.64934	0.0659	0.14683	1	0.52741
ENST00000219150	1.27419	0.27535	0.62011	1.36864	2.04792	0.40397	-0.32769	0.12249	1	1.27731	2.09305	0.37763	0.3426	0.87682	0.97445	0.03156	0.64937	0.99476	-0.02077	0.69321	0.99255	-1.69633	-1.83739	0.53215	-0.09133	0.06379	1	-1.02604	-1.15322	0.90619	-1.33708	-1.3927	0.80222	-1.3894	-1.34968	0.82403	1.60501	1.88152	0.50388	0.6703	0.71432	0.99115	0.35925	0.49526	0.99884	0.30693	0.53741	0.99816	-0.93471
ENST00000219168	0.90172	0.49655	0.78737	-0.88381	-0.7177	0.99052	1.22957	1.5118	0.73442	-0.41964	-0.59423	0.99653	-0.71559	-0.69039	0.9922	-0.08708	-0.02966	1	-0.53221	-0.78067	0.98526	2.11339	2.16512	0.36461	0.46417	0.10211	1	0.16822	0.00246	1	0.79673	0.65424	0.99423	0.3516	-0.10899	1	-1.64921	-2.02587	0.43736	-1.94517	-2.10878	0.39356	-1.31665	-1.48533	0.74912	-1.76178	-2.17029	0.36111	-0.29596
ENST00000219169	0.83675	0.54385	0.81311	0.02311	0.34841	0.99986	-0.1316	-0.29144	0.99995	0.12675	0.68122	0.9936	-0.2175	-0.88755	0.97439	0.20228	1.10404	0.92688	-0.11615	-0.27435	0.99997	-0.15471	-0.61445	0.99636	0.10364	0.33542	0.99989	-0.2406	-1.21268	0.88925	0.17917	0.75979	0.98852	-0.13926	-0.60871	0.99655	0.25835	0.92302	0.96885	-0.08589	-0.55017	0.99803	0.33388	1.31816	0.84344	0.01545	0.02595	1	-0.34425
ENST00000219197	3.05213	0.00871	0.08858	-0.71033	-1.0488	0.938	0.00967	0.20559	0.99999	-0.33684	-0.1525	1	0.70921	1.86833	0.52418	0.77079	2.08844	0.39594	0.9191	2.37218	0.26279	0.72	1.17744	0.89687	0.37349	0.89204	0.97132	1.41954	2.8824	0.10935	1.48112	3.08713	0.06866	1.62943	3.37705	0.03868	-0.34651	-0.34662	0.99983	0.69954	1.55384	0.71091	0.76112	1.76498	0.58412	0.90943	2.03817	0.42501	1.04605
ENST00000219204	1.25984	0.28241	0.62726	-0.0997	-0.68765	0.99328	-0.0282	0.20303	0.99999	-0.18264	-1.36979	0.81786	-0.15703	-1.2176	0.88738	0.01486	0.28099	0.99996	0.05941	0.78897	0.98603	0.0715	0.84226	0.9804	-0.08294	-0.68171	0.99359	-0.05733	-0.54628	0.99811	0.11456	0.93761	0.96638	0.1591	1.44503	0.77704	-0.15444	-1.47445	0.76007	-0.12883	-1.3336	0.83603	0.04306	0.06738	1	0.0876	0.54323	0.99817	0.02561
ENST00000219207	1.69337	0.12984	0.43764	0.35882	1.18096	0.89863	0.07474	0.35516	0.99983	0.51602	1.12402	0.91817	0.48471	1.56762	0.70293	0.6591	2.17962	0.32211	-0.14695	-0.57344	0.99738	-0.28408	-0.75095	0.98856	0.1572	-0.03207	1	0.1259	0.41823	0.99955	0.30028	1.03629	0.94305	-0.50577	-1.70353	0.61618	0.44128	0.70595	0.99173	0.40997	1.12717	0.9169	0.58436	1.70829	0.61338	-0.22169	-0.87855	0.97465	-0.03131
ENST00000219240	2.01381	0.07045	0.32058	0.24726	1.81089	0.54166	0.15663	0.8571	0.97843	0.25764	1.93154	0.46098	0.10743	0.63817	0.99548	-0.03168	-0.38744	0.99973	-0.05773	-0.71422	0.99171	-0.09063	-0.81708	0.9831	0.01038	0.14587	1	-0.13983	-1.09409	0.92949	-0.27894	-2.11251	0.34769	-0.30499	-2.4439	0.18378	0.10101	0.94121	0.9655	-0.04919	-0.23276	0.99999	-0.18831	-1.17904	0.9017	-0.21436	-1.48574	0.75324	-0.15021
ENST00000219251	1.89152	0.08761	0.35718	-0.56879	-0.37585	0.99964	0.42063	0.44498	0.99893	0.04682	0.29784	0.99989	-0.91742	-1.34759	0.81539	-1.68806	-2.48079	0.24409	0.19824	0.79342	0.97885	0.98942	0.80408	0.97747	0.61561	0.67713	0.99039	-0.34863	-0.97148	0.95029	-1.11927	-2.06919	0.41444	0.76703	1.15071	0.89531	-0.37381	-0.16428	1	-1.33805	-1.72624	0.62043	-2.10869	-2.84142	0.16264	-0.22239	0.33421	0.99978	-0.96424
ENST00000219252	2.76989	0.01545	0.13047	-0.23558	-3.61731	0.00565	-0.17999	-2.6557	0.11034	-0.15402	-2.7479	0.08729	-0.18036	-2.56519	0.1374	-0.15792	-2.38679	0.20458	-0.06988	-1.36131	0.82231	0.05559	0.71705	0.9916	0.08157	0.80119	0.9849	0.05523	0.92789	0.96813	0.07767	1.09751	0.929	0.1657	2.11681	0.34295	0.02597	0.04542	1	-0.00037	0.17415	1	0.02207	0.33462	0.99989	0.11011	1.28991	0.85678	-0.02634
ENST00000219255	0.35961	0.90305	0.96974	-0.21861	-0.61467	0.99593	0.13311	0.13349	1	0.17274	0.57085	0.99725	0.38983	-0.00921	1	0.24387	0.27663	0.99996	0.74078	0.75119	0.98782	0.35172	0.70073	0.99171	0.39135	1.166	0.9019	0.60844	0.56942	0.99724	0.46248	0.85394	0.97698	0.95939	1.31331	0.84043	0.03963	0.39952	0.99963	0.25672	-0.13526	1	0.11075	0.13096	1	0.60766	0.57901	0.99697	0.21709
ENST00000219271	3.84659	0.00168	0.02734	0.31847	2.75407	0.08705	0.28912	2.48014	0.16833	0.49695	4.43809	0.00022	0.37695	2.83357	0.07082	0.21768	1.85031	0.51437	0.12364	1.42599	0.78769	-0.02935	-0.07556	1	0.17848	1.72418	0.6001	0.05849	0.20076	0.99999	-0.10079	-0.79524	0.98541	-0.19483	-1.23923	0.87856	0.20783	1.69102	0.62241	0.08783	0.26097	0.99997	-0.07145	-0.67067	0.99412	-0.16548	-1.08366	0.93283	-0.11999
ENST00000219281	0.16951	0.98447	0.99627	-0.15989	0.11311	1	0.12828	0.77331	0.98695	-0.01571	0.36854	0.99979	0.0173	0.56672	0.99757	-0.12796	0.17905	1	0.0295	0.63423	0.99551	0.28817	0.66643	0.99408	0.14418	0.25666	0.99998	0.17719	0.45614	0.99929	0.03193	0.06921	1	0.18939	0.52301	0.99846	-0.14399	-0.41708	0.99957	-0.11098	-0.22076	0.99999	-0.25624	-0.58429	0.99713	-0.09877	-0.16056	1	0.03301
ENST00000219299	3.45021	0.00377	0.04928	-0.11823	-0.91944	0.96904	-0.25752	-2.17169	0.316	-0.0715	-0.2938	0.99995	-0.02213	-0.12981	1	-0.29962	-2.7373	0.09452	-0.3148	-3.18082	0.02782	-0.13929	-1.29838	0.852	0.04673	0.60625	0.99655	0.0961	0.74967	0.98909	-0.18139	-1.83009	0.52941	-0.19657	-2.27253	0.26251	0.18602	1.85075	0.51573	0.23539	1.96236	0.44259	-0.0421	-0.46135	0.99926	-0.05729	-0.87084	0.97649	0.04937
ENST00000219302	1.06008	0.39039	0.71714	0.28961	1.57854	0.69618	0.00595	0.31081	0.99992	0.1976	1.05479	0.93902	0.43311	2.22272	0.29836	0.09029	0.74302	0.98936	0.09089	0.77831	0.98644	-0.28366	-1.16334	0.90528	-0.09201	-0.50194	0.99875	0.14349	0.67755	0.99334	-0.19932	-0.7792	0.98624	-0.19872	-0.75174	0.9886	0.19165	0.67831	0.99341	0.42715	1.77984	0.56628	0.08434	0.39464	0.99969	0.08494	0.42628	0.99951	0.23551
ENST00000219313	3.03093	0.00897	0.09043	-0.30693	-3.76767	0.0032	-0.16766	-1.81527	0.53774	-0.27646	-3.43225	0.01088	-0.18491	-2.03852	0.39049	-0.21479	-2.543	0.14456	-0.14518	-1.90769	0.47529	0.13927	1.7114	0.60843	0.03047	0.2828	0.99996	0.12202	1.60024	0.68224	0.09214	1.10111	0.92794	0.16175	1.7415	0.588	-0.10881	-1.42476	0.78852	-0.01725	-0.15611	1	-0.04713	-0.62731	0.99594	0.02248	-0.02853	1	0.09155
ENST00000219315	1.36633	0.2336	0.57686	0.05186	0.25547	0.99997	0.64642	2.29681	0.2764	0.02789	0.1607	1	0.00783	0.0815	1	0.17613	0.72888	0.98988	-0.09063	-0.51409	0.99851	0.59456	2.05069	0.40523	-0.02397	-0.0911	1	-0.04403	-0.16698	1	0.12428	0.48051	0.99897	-0.14249	-0.7561	0.98778	-0.61853	-2.11394	0.36927	-0.63859	-2.1655	0.34248	-0.47029	-1.53787	0.72063	-0.73705	-2.69535	0.13069	-0.02006
ENST00000219320	0.82589	0.55235	0.81782	0.38074	0.62905	0.99555	0.39039	0.44649	0.99935	-0.84043	-0.0955	1	1.09225	1.26386	0.86373	0.53083	0.6136	0.99612	-1.08859	-0.76492	0.9877	0.00965	-0.13387	1	-1.22117	-0.73697	0.98968	0.71151	0.66239	0.99382	0.15009	0.01341	1	-1.46932	-1.38022	0.81048	-1.23082	-0.54126	0.99808	0.70186	0.75055	0.98809	0.14044	0.14112	1	-1.47898	-1.13536	0.91487	1.93268
ENST00000219343	1.42608	0.21124	0.55339	-1.55309	-1.18719	0.89532	-0.76834	-0.46091	0.9992	-2.70164	-2.37233	0.23142	-2.02685	-1.82515	0.53835	-2.35094	-1.82721	0.53642	-1.06856	-0.75202	0.98818	0.78475	0.68434	0.99307	-1.14855	-1.28723	0.85651	-0.47376	-0.71297	0.99151	-0.79785	-0.70645	0.99197	0.48453	0.39375	0.99969	-1.9333	-1.84847	0.51986	-1.25851	-1.32176	0.8396	-1.5826	-1.32007	0.84066	-0.30022	-0.28109	0.99996	0.67479
ENST00000219345	2.03087	0.06793	0.3141	-0.64154	-2.16162	0.32203	-0.18376	-0.5955	0.99687	-0.29959	-0.92263	0.96843	-0.14545	-0.18858	1	-0.64053	-2.49067	0.16874	-0.05225	-0.11082	1	0.45778	1.41164	0.79498	0.34195	1.19973	0.89354	0.49608	1.90938	0.47712	0.00101	-0.40487	0.99965	0.58929	1.98223	0.42944	-0.11583	-0.27367	0.99996	0.03831	0.40432	0.99965	-0.45677	-1.74096	0.58946	0.13151	0.4758	0.99912	0.15414
ENST00000219400	0.94926	0.46345	0.76664	0.07649	0.32569	0.9999	0.20216	0.79994	0.9847	0.1556	0.64245	0.99526	0.29752	1.2218	0.88466	-0.0121	-0.49118	0.99895	-0.07782	-0.76853	0.98764	0.12567	0.49291	0.99892	0.07911	0.31783	0.99991	0.22103	0.89889	0.97219	-0.08859	-0.79513	0.9852	-0.15431	-1.07323	0.9352	-0.04656	-0.18853	1	0.09536	0.3661	0.9998	-0.21426	-1.21881	0.88604	-0.27998	-1.48067	0.75596	0.14192
ENST00000219409	3.03453	0.00898	0.0905	1.15758	2.50647	0.20019	-0.07192	0.64872	0.99455	-0.81479	-0.99905	0.95165	1.24464	2.70074	0.14893	-0.31562	0.44267	0.99936	0.21796	0.56659	0.99739	-1.22949	-1.73851	0.59829	-1.97237	-3.45376	0.0271	0.08707	0.2759	0.99995	-1.47319	-2.03179	0.41945	-0.93962	-1.84127	0.53492	-0.74288	-1.57835	0.69634	1.31656	1.95185	0.47121	-0.2437	-0.22247	0.99999	0.28987	-0.08425	1	2.05944
ENST00000219431	0.04421	0.99963	0.99995	-0.22776	-0.11544	1	0.09604	-0.09413	1	0.00192	0.14531	1	-0.17972	0.02078	1	-0.7624	-0.24779	0.99998	-0.32703	-0.28562	0.99995	0.3238	0.01145	1	0.22968	0.2581	0.99997	0.04804	0.13265	1	-0.53464	-0.13229	1	-0.09927	-0.17375	1	-0.09412	0.22595	0.99999	-0.27576	0.11078	1	-0.85843	-0.13207	1	-0.42307	-0.17055	1	-0.18164
ENST00000219439	0.7827	0.58534	0.83491	0.14169	1.25337	0.87263	-0.17615	-0.73273	0.99053	0.09793	0.89172	0.97377	0.05099	0.47622	0.99913	0.05344	0.41284	0.99962	-0.04369	0.0495	1	-0.31784	-1.90267	0.47924	-0.04376	-0.33947	0.99988	-0.09069	-0.7288	0.99079	-0.08825	-0.79417	0.98551	-0.18538	-1.1658	0.90669	0.27408	1.55237	0.71274	0.22714	1.15186	0.9115	0.22959	1.09306	0.93015	0.13246	0.75842	0.98864	-0.04693
ENST00000219473	1.07652	0.38036	0.70964	-0.1155	-0.63654	0.99557	0.43984	1.12896	0.91897	-0.21648	-0.79493	0.98544	0.3129	0.68199	0.99354	0.35802	0.93042	0.96754	-0.02987	-0.11506	1	0.55534	1.69145	0.62217	-0.10098	-0.1614	1	0.4284	1.27239	0.86427	0.47352	1.51944	0.73308	0.08563	0.50161	0.99883	-0.65631	-1.82782	0.52989	-0.12694	-0.45148	0.99936	-0.08182	-0.2261	0.99999	-0.4697	-1.2036	0.89266	0.52937
ENST00000219476	0.43398	0.85478	0.95243	0.45375	0.18092	1	0.21681	0.21541	0.99999	0.18153	0.63545	0.99526	-0.00434	-0.18621	1	1.32481	1.27232	0.86002	0.73601	0.64487	0.99484	-0.23694	0.04359	1	-0.27223	0.44216	0.99937	-0.45809	-0.3584	0.99981	0.87106	1.08156	0.9293	0.28225	0.46086	0.9992	-0.03528	0.375	0.99976	-0.22115	-0.38264	0.99973	1.108	0.99113	0.95281	0.5192	0.39683	0.99966	-0.18587
ENST00000219478	1.26234	0.27984	0.62454	0.06672	0.19309	1	-0.48758	-1.30584	0.84864	-0.66133	-1.52769	0.72787	-0.77733	-1.77648	0.56544	-0.38175	-0.6541	0.99479	-0.1254	-0.12098	1	-0.55431	-1.47257	0.76074	-0.72805	-1.69823	0.61808	-0.84405	-1.94177	0.45548	-0.44848	-0.83495	0.98098	-0.19212	-0.30755	0.99993	-0.17375	-0.14209	1	-0.28975	-0.39102	0.99972	0.10583	0.66152	0.99448	0.36219	1.15787	0.90894	-0.116
ENST00000219479	2.03615	0.0674	0.31261	-0.4196	-2.19752	0.30556	0.01467	0.29829	0.99994	0.0258	0.63775	0.99535	-0.06959	-0.05194	1	0.03482	0.72215	0.99093	0.0318	0.48371	0.99901	0.43427	2.31318	0.24826	0.4454	2.77658	0.09063	0.35001	2.05417	0.3883	0.45442	2.80839	0.08345	0.4514	2.57852	0.14309	0.01113	0.29489	0.99994	-0.08426	-0.33622	0.99988	0.02016	0.38211	0.99974	0.01713	0.16175	1	-0.09539
ENST00000219481	1.1265	0.3521	0.68697	0.22321	1.55604	0.71045	0.33243	1.9791	0.42898	0.21646	1.74895	0.58317	0.35798	2.11389	0.34569	0.26963	1.87464	0.49791	0.22733	1.50306	0.74306	0.10923	0.52672	0.99846	-0.00674	0.20244	0.99999	0.13478	0.61062	0.99648	0.04642	0.36152	0.99982	0.00413	-0.00717	1	-0.11597	-0.33298	0.99989	0.02555	0.06381	1	-0.0628	-0.17408	1	-0.1051	-0.52118	0.99855	0.14152
ENST00000219535	0.83777	0.54358	0.81296	-0.11054	-0.61609	0.99613	-0.07618	-0.47256	0.99912	0.33895	1.29858	0.85045	0.01899	-0.07397	1	-0.09086	-0.15333	1	0.28527	0.70363	0.99202	0.03436	0.09962	1	0.44949	1.87859	0.50091	0.12953	0.51548	0.99856	0.01967	0.4388	0.99943	0.39581	1.27935	0.85929	0.41513	1.66248	0.6427	0.09517	0.38576	0.99973	-0.01468	0.31347	0.99992	0.36145	1.10472	0.92482	-0.31996
ENST00000219542	1.24514	0.28935	0.63462	-0.13059	-0.86443	0.97728	-0.07754	-0.76512	0.9879	0.20931	1.21916	0.88581	-0.11819	-0.70744	0.992	0.05979	0.16538	1	0.16498	0.82029	0.98261	0.05305	0.03912	1	0.3399	2.03596	0.3965	0.0124	0.12635	1	0.19038	0.98684	0.95631	0.29557	1.63491	0.65994	0.28685	1.8703	0.50308	-0.04065	0.08027	1	0.13733	0.88634	0.97422	0.24252	1.49618	0.7468	-0.32751
ENST00000219548	0.91823	0.48499	0.77987	-0.1262	-0.83774	0.98097	-0.13756	-0.92251	0.96903	-0.10494	-0.91648	0.97002	-0.13202	-0.6544	0.99488	-0.11556	-0.7154	0.9917	0.07301	0.97728	0.9589	-0.01136	-0.13519	1	0.02126	-0.09212	1	-0.00582	0.15712	1	0.01064	0.09679	1	0.19921	1.77716	0.56378	0.03262	0.04634	1	0.00554	0.27964	0.99996	0.022	0.22273	0.99999	0.21057	1.80889	0.54215	-0.02708
ENST00000219599	3.13879	0.00721	0.07829	1.76194	3.76307	0.02053	0.97709	3.61209	0.01971	0.63697	2.16043	0.3453	0.87089	2.01421	0.42987	0.95569	2.96754	0.07816	0.42763	2.40073	0.22965	-0.78485	-0.02837	1	-1.12498	-1.64689	0.65684	-0.89105	-1.70566	0.62272	-0.80625	-0.7492	0.98678	-1.33431	-1.37026	0.80975	-0.34013	-1.56306	0.70558	-0.1062	-1.62283	0.6702	-0.0214	-0.69806	0.99134	-0.54946	-1.30447	0.84331	0.23393
ENST00000219611	0.82632	0.55206	0.81771	0.12588	0.74313	0.9898	0.25367	1.15577	0.91018	0.15106	0.94527	0.96497	0.16053	0.95564	0.96304	-0.16337	-0.64799	0.99513	0.12151	0.83787	0.98091	0.12779	0.46071	0.99928	0.02518	0.20886	0.99999	0.03465	0.23467	0.99999	-0.28924	-1.35703	0.82435	-0.00437	0.11404	1	-0.10261	-0.26022	0.99997	-0.09314	-0.22801	0.99999	-0.41704	-1.71622	0.60535	-0.13216	-0.34374	0.99987	0.00947
ENST00000219689	0.93477	0.47329	0.77264	-0.49245	-1.5192	0.73286	-0.06261	-0.44236	0.99941	-0.76738	-1.96451	0.44183	-0.31426	-0.75032	0.98895	-0.39048	-1.00463	0.95217	-0.03371	-0.33625	0.99988	0.42984	0.95723	0.96205	-0.27494	-0.44578	0.99939	0.17819	0.72443	0.99087	0.10197	0.47026	0.99917	0.45874	1.1264	0.919	-0.70477	-1.36282	0.82042	-0.25165	-0.26368	0.99997	-0.32787	-0.49914	0.99883	0.0289	0.11569	1	0.45313
ENST00000219782	3.24462	0.00543	0.06388	-0.32419	-2.21428	0.28875	0.1062	0.52467	0.9985	-0.15089	-0.76067	0.98847	-0.39941	-2.58044	0.13324	0.04531	0.46221	0.99927	0.04334	0.32971	0.9999	0.43039	2.56353	0.13872	0.1733	1.41439	0.79413	-0.07521	-0.42247	0.99956	0.3695	2.58301	0.13238	0.36754	2.45949	0.17556	-0.2571	-1.22043	0.88625	-0.50561	-2.89758	0.05892	-0.06089	-0.07689	1	-0.06286	-0.20202	0.99999	-0.24851
ENST00000219789	0.89839	0.49911	0.78875	0.13169	0.30295	0.99994	0.00048	-0.09155	1	0.02557	0.02936	1	-0.33509	-0.74795	0.98927	-0.27052	-0.93503	0.96646	0.37985	1.17851	0.9013	-0.13121	-0.37089	0.99979	-0.10612	-0.26503	0.99997	-0.46678	-1.0307	0.94622	-0.40221	-1.21358	0.8882	0.24816	0.87752	0.9754	0.0251	0.11632	1	-0.33557	-0.60228	0.99668	-0.271	-0.77527	0.98706	0.37937	1.18825	0.89769	-0.36067
ENST00000219794	0.90655	0.49331	0.78519	0.23904	1.56724	0.70339	0.0209	0.22217	0.99999	0.19363	1.33695	0.83443	0.0571	0.16175	1	0.15264	0.5958	0.99694	-0.01132	-0.26309	0.99997	-0.21814	-1.23784	0.87924	-0.0454	-0.20488	0.99999	-0.18193	-1.33725	0.83425	-0.0864	-0.90654	0.97157	-0.25036	-1.76889	0.56951	0.17273	1.02677	0.94786	0.0362	-0.06238	1	0.13174	0.34243	0.99987	-0.03222	-0.45946	0.9993	-0.13653
ENST00000219797	1.87942	0.09101	0.36436	-0.18457	-0.31044	0.99991	-0.23137	-0.14642	1	-0.48533	-0.39067	0.99967	-0.96633	-2.03821	0.4116	-0.44137	-0.87762	0.97341	0.68495	1.44956	0.76988	-0.0468	0.14655	1	-0.30075	-0.07895	1	-0.78176	-1.7294	0.60214	-0.2568	-0.57562	0.99711	0.86953	1.73973	0.5984	-0.25396	-0.22136	0.99999	-0.73496	-1.77325	0.57397	-0.21	-0.68629	0.99255	0.91633	1.51953	0.73094	-0.481
ENST00000219837	1.76952	0.1126	0.40736	0.17278	1.86469	0.50497	-0.07849	-0.25531	0.99998	0.17223	2.05477	0.38171	0.20884	1.8484	0.51604	0.09415	0.83858	0.98078	-0.00418	0.30743	0.99993	-0.25127	-1.99182	0.42124	-0.00055	0.21139	0.99999	0.03606	0.0552	1	-0.07863	-0.95393	0.96329	-0.17696	-1.49374	0.74858	0.25072	2.16504	0.31675	0.28733	1.97459	0.43246	0.17264	1.02807	0.94742	0.07431	0.53451	0.99833	0.03661
ENST00000219905	0.48072	0.82163	0.94003	0.59393	0.30355	0.99992	-0.12223	0.49049	0.99879	0.1117	0.21253	0.99999	0.97861	1.48624	0.74854	-0.69832	-0.28396	0.99995	0.17751	0.47299	0.999	-0.71617	0.1871	1	-0.48224	-0.09063	1	0.38467	1.15134	0.90031	-1.29225	-0.57493	0.99699	-0.41642	0.16716	1	0.23393	-0.27737	0.99995	1.10084	0.94599	0.95877	-0.57609	-0.75358	0.98777	0.29975	-0.02127	1	0.86691
ENST00000220003	1.25614	0.28415	0.62921	0.11528	0.76718	0.98781	0.08942	0.44898	0.99937	0.3505	2.36	0.22058	0.12245	0.95821	0.96225	0.29755	1.82599	0.53176	0.08535	0.8819	0.97504	-0.02586	-0.26636	0.99997	0.23522	1.58416	0.69262	0.00716	0.21464	0.99999	0.18227	1.07691	0.93433	-0.02993	0.13197	1	0.26108	1.75645	0.57885	0.03302	0.46077	0.99927	0.20813	1.27341	0.86349	-0.00407	0.38521	0.99974	-0.22805
ENST00000220058	2.03285	0.06766	0.31337	0.13984	1.37031	0.81721	-0.13971	-1.53465	0.72369	0.15315	1.66306	0.64124	0.0522	0.57073	0.99756	0.05136	0.36587	0.99981	0.02126	-0.01586	1	-0.27955	-2.79199	0.08058	0.01331	0.30831	0.99993	-0.08763	-0.74534	0.98953	-0.08848	-0.95157	0.9636	-0.11858	-1.33552	0.83472	0.29286	3.04492	0.04021	0.19191	2.00329	0.41483	0.19107	1.81541	0.53856	0.16097	1.46716	0.76412	-0.10095
ENST00000220062	2.19186	0.0496	0.2641	0.04125	0.65744	0.99474	0.2294	2.38227	0.20718	0.06411	0.71312	0.99183	0.08802	1.19981	0.89431	0.26963	2.7139	0.09583	0.23821	2.27861	0.25537	0.18815	1.75975	0.57576	0.02286	0.06392	1	0.04677	0.55845	0.99787	0.22838	2.06267	0.376	0.19696	1.63397	0.66025	-0.1653	-1.67481	0.63315	-0.14138	-1.18793	0.89875	0.04023	0.23273	0.99999	0.00881	-0.1821	1	0.02392
ENST00000220166	4.2545	0.00072	0.0145	0.28122	1.815	0.53904	0.61117	3.24147	0.02284	0.65285	3.95977	0.00191	0.51737	3.32021	0.01785	0.50898	3.56342	0.0078	0.37063	1.70894	0.61062	0.32995	1.57409	0.699	0.37163	2.15612	0.32427	0.23615	1.55506	0.71096	0.22776	1.78199	0.56155	0.08941	-0.03502	1	0.04168	0.45446	0.99932	-0.09379	-0.08931	1	-0.10219	0.113	1	-0.24054	-1.56283	0.7061	-0.13547
ENST00000220325	14.6189	0	0	0.52145	5.22476	1e-05	0.15399	2.01795	0.40435	0.58805	6.06273	0	0.9057	7.89749	0	0.33131	3.5581	0.00736	0.18903	2.05785	0.3794	-0.36746	-2.88088	0.06256	0.0666	0.89857	0.97266	0.38424	2.92816	0.05583	-0.19014	-1.504	0.74242	-0.33243	-3.00498	0.04406	0.43406	3.69351	0.00462	0.75171	5.5418	0	0.17732	1.3791	0.8129	0.03503	-0.02882	1	0.31764
ENST00000220429	0.81893	0.5573	0.82042	0.44036	0.89402	0.97039	1.5019	1.92083	0.4956	-0.15111	0.32809	0.99988	0.30786	0.09062	1	1.00066	1.39135	0.80071	0.03775	0.40234	0.99962	1.06154	1.11227	0.91466	-0.59147	-0.56451	0.99734	-0.1325	-0.76444	0.98621	0.5603	0.54968	0.99759	-0.40261	-0.46914	0.99906	-1.653	-1.62181	0.67158	-1.19404	-1.7707	0.5844	-0.50124	-0.55608	0.99721	-1.46415	-1.52072	0.72967	0.45896
ENST00000220496	1.24291	0.29058	0.63588	0.09426	1.10221	0.92672	-0.00335	-0.10681	1	0.05994	0.88914	0.9738	0.04329	0.23389	0.99999	0.26017	2.11663	0.34766	0.02066	-0.04832	1	-0.09761	-1.12785	0.91871	-0.03432	-0.19657	1	-0.05097	-0.82151	0.98241	0.16592	1.04519	0.94254	-0.07359	-1.1085	0.92485	0.06329	0.92965	0.96729	0.04664	0.3201	0.99991	0.26352	2.07634	0.37152	0.02402	0.05826	1	-0.01665
ENST00000220509	1.02794	0.4116	0.73166	0.01577	0.10655	1	0.09295	1.29561	0.854	0.10792	1.63307	0.66086	0.02467	0.55596	0.99791	0.13279	1.77451	0.5658	0.08268	1.09314	0.93014	0.07719	1.18499	0.89979	0.09215	1.50743	0.74041	0.0089	0.44768	0.99939	0.11702	1.65286	0.6478	0.06691	0.98134	0.95797	0.01496	0.24624	0.99998	-0.06829	-0.73138	0.99062	0.03984	0.40508	0.99966	-0.01028	-0.23369	0.99999	-0.08325
ENST00000220514	5.10437	0.00012	0.00366	-0.67119	-3.67157	0.00638	-0.50374	-2.60436	0.13359	-0.94594	-5.3957	1e-05	-0.56874	-2.90564	0.06433	-0.64975	-3.48821	0.01141	-0.54552	-3.05505	0.04234	0.16746	0.84298	0.97992	-0.27475	-1.74771	0.5851	0.10246	0.66378	0.9943	0.02144	0.09002	1	0.12568	0.49735	0.99886	-0.44221	-2.46671	0.17867	-0.065	-0.19728	0.99999	-0.14601	-0.73721	0.99003	-0.04178	-0.35167	0.99985	0.3772
ENST00000220531	0.82735	0.55093	0.81696	0.01464	0.27747	0.99996	-1.20849	-0.83373	0.98122	-1.38324	-1.46547	0.765	-0.52447	-0.14306	1	-0.66005	-0.14247	1	-1.2003	-0.97214	0.95957	-1.22313	-1.1037	0.92653	-1.39788	-1.73501	0.59327	-0.53911	-0.41831	0.99958	-0.67469	-0.42056	0.99957	-1.21494	-1.24706	0.87482	-0.17474	-0.60945	0.99651	0.68402	0.68728	0.99323	0.54844	0.6976	0.99268	0.00819	-0.1157	1	0.85877
ENST00000220562	1.68243	0.1325	0.44146	-0.66848	-2.06538	0.37413	-0.03329	0.30992	0.99993	-0.65302	-1.86745	0.5025	0.03029	-0.19335	1	-0.23593	-0.43152	0.99951	-0.48539	-1.19782	0.89512	0.6352	2.23648	0.2767	0.01546	0.18104	1	0.69877	1.76813	0.57001	0.43255	1.56683	0.70365	0.18309	0.83004	0.98185	-0.61974	-2.05223	0.38224	0.06358	-0.47972	0.9991	-0.20265	-0.70755	0.99217	-0.45211	-1.42839	0.78645	0.68331
ENST00000220584	1.79771	0.10508	0.3931	2.01901	1.75624	0.58233	2.0441	1.77521	0.5701	2.68583	2.52688	0.17784	1.559	1.13234	0.91559	1.88835	2.0484	0.39583	0.6417	0.28368	0.99996	0.02509	0.14022	1	0.66683	0.78719	0.98447	-0.46001	-0.54858	0.99783	-0.13065	0.31065	0.99992	-1.3773	-1.40022	0.79931	0.64174	0.60872	0.99604	-0.4851	-0.65467	0.9943	-0.15574	0.15527	1	-1.40239	-1.45166	0.77121	-1.12684
ENST00000220592	0.95979	0.45625	0.76193	-0.22982	-0.91608	0.97008	0.29198	1.05486	0.94082	-0.09072	-0.47613	0.99914	-0.16574	-0.85121	0.97934	0.06367	0.55229	0.998	-0.03924	-0.34285	0.99987	0.5218	1.88898	0.48804	0.1391	0.42113	0.99957	0.06408	0.03271	1	0.29348	1.42624	0.78765	0.19058	0.54026	0.99823	-0.3827	-1.47098	0.76213	-0.45772	-1.80312	0.54618	-0.22832	-0.50836	0.99875	-0.33122	-1.33871	0.83359	-0.07502
ENST00000220597	4.32858	0.0006	0.01248	0.44836	3.3113	0.02075	0.04467	0.50899	0.99869	0.19275	1.61197	0.67491	0.55978	3.7982	0.0046	0.06846	0.63635	0.99547	0.08452	0.29813	0.99994	-0.40369	-2.58729	0.14009	-0.25561	-1.64227	0.65546	0.11142	0.60249	0.99658	-0.37991	-2.54851	0.15242	-0.36384	-2.88786	0.06754	0.14808	1.00346	0.95232	0.51511	3.07586	0.04194	0.02378	0.10406	1	0.03985	-0.21195	0.99999	0.36703
ENST00000220659	5.67345	4e-05	0.00144	-0.3391	-4.67144	7e-05	-0.10644	-1.58395	0.69274	-0.22127	-3.16624	0.0267	-0.31543	-4.09198	0.00093	-0.12256	-1.6907	0.62251	-0.05908	-0.99264	0.9556	0.23266	2.75018	0.0875	0.11783	1.42284	0.78948	0.02367	0.43213	0.9995	0.21654	2.79407	0.07793	0.28002	3.49729	0.00891	-0.11483	-1.38179	0.8116	-0.20899	-2.27012	0.25995	-0.01612	-0.04783	1	0.04736	0.6035	0.99671	-0.09416
ENST00000220669	0.935	0.47315	0.77255	-0.2881	-0.72191	0.99067	-0.17489	-0.71649	0.99105	-0.34419	-1.0975	0.92643	-0.65254	-2.00958	0.41947	-0.2047	-0.52961	0.99829	-0.08733	0.03333	1	0.11321	-0.04088	1	-0.05609	-0.37992	0.99974	-0.36444	-1.29462	0.85185	0.0834	0.16424	1	0.20077	0.72526	0.99046	-0.1693	-0.31473	0.99991	-0.47765	-1.16966	0.90281	-0.02981	0.19365	1	0.08756	0.72183	0.9907	-0.30835
ENST00000220751	0.63692	0.70041	0.88982	0.01301	0.29703	0.99994	0.30338	0.83821	0.97919	0.24307	0.57443	0.9972	0.07279	0.00259	1	0.49417	1.41294	0.7915	-0.23962	-0.33127	0.99988	0.29038	0.56358	0.99748	0.23007	0.28556	0.99995	0.05978	-0.28424	0.99995	0.48116	1.13255	0.91377	-0.25263	-0.62016	0.99581	-0.06031	-0.28487	0.99995	-0.23059	-0.81095	0.98229	0.19079	0.52043	0.99837	-0.54301	-1.1263	0.91631	-0.17028
ENST00000220763	8.87723	0	1e-05	-0.02642	0.06657	1	0.29466	3.32974	0.01635	0.24344	2.7563	0.08729	0.20271	2.87241	0.06436	0.40945	4.87234	3e-05	0.43705	5.23273	1e-05	0.32108	3.2469	0.02137	0.26985	2.65948	0.11145	0.22912	2.78404	0.08151	0.43587	4.76816	5e-05	0.46347	5.14227	1e-05	-0.05122	-0.70892	0.99203	-0.09195	-0.54987	0.99803	0.11479	1.33385	0.83565	0.14239	1.66146	0.64222	-0.04073
ENST00000220764	8.49545	0	1e-05	0.53195	4.39834	0.00023	0.03551	0.58361	0.99728	0.61567	5.16892	1e-05	0.37878	3.15796	0.02695	0.12638	0.7644	0.9882	0.06566	0.43531	0.99948	-0.49643	-3.53647	0.00758	0.08372	0.84208	0.98045	-0.15316	-1.09322	0.93022	-0.40557	-3.46515	0.00975	-0.46628	-3.81653	0.00267	0.58015	4.27589	0.0004	0.34327	2.39883	0.19952	0.09086	0.15278	1	0.03015	-0.15776	1	-0.23688
ENST00000220772	8.56664	0	1e-05	0.18108	1.16395	0.90672	1.1872	3.92381	0.00273	0.27897	1.6785	0.63121	0.75656	2.98165	0.05156	1.54163	5.1853	2e-05	1.50707	5.13577	2e-05	1.00611	2.89701	0.06603	0.09789	0.52858	0.9984	0.57548	1.88183	0.4961	1.36055	4.12961	0.0014	1.32599	4.07198	0.00167	-0.90822	-2.39653	0.20983	-0.43064	-1.08374	0.93142	0.35443	1.07679	0.93322	0.31988	0.9964	0.95349	0.47758
ENST00000220809	2.28087	0.04134	0.23829	0.17512	1.26819	0.86618	0.09974	0.87045	0.97676	0.43409	3.09181	0.0342	0.51964	2.59489	0.13028	0.36048	2.04219	0.38934	0.40522	2.06138	0.37751	-0.07537	-0.31983	0.99991	0.25897	1.81926	0.53574	0.34452	1.37841	0.81312	0.18536	0.81401	0.9835	0.2301	0.83598	0.98107	0.33434	2.04006	0.39087	0.41989	1.61549	0.67241	0.26073	1.08108	0.9335	0.30547	1.10148	0.92755	0.08555
ENST00000220822	2.20564	0.04818	0.25997	1.36027	1.18286	0.89272	-1.43997	-2.2331	0.29591	0.13237	0.07454	1	0.7252	0.58289	0.9968	-0.32416	-0.53886	0.99805	-0.21063	-0.9582	0.96001	-2.80024	-3.24873	0.04518	-1.2279	-1.08452	0.92551	-0.63507	-0.56756	0.997	-1.68443	-1.64893	0.6542	-1.57091	-2.03466	0.42233	1.57234	2.23906	0.29489	2.16517	2.65516	0.1426	1.11581	1.60739	0.67816	1.22934	1.1776	0.89968	0.59282
ENST00000220847	1.02369	0.41395	0.73345	-1.06163	-1.29728	0.84941	-0.43174	-0.55401	0.99771	-1.49134	-2.05728	0.39341	-1.33681	-1.83482	0.53252	-0.92224	-0.93397	0.96485	-0.66053	-0.60945	0.99617	0.62988	0.65442	0.99441	-0.42972	-0.76361	0.98759	-0.27518	-0.56979	0.99743	0.13939	0.32302	0.9999	0.4011	0.65583	0.99441	-1.0596	-1.35312	0.82351	-0.90507	-1.16556	0.90356	-0.4905	-0.33446	0.99988	-0.22879	-0.02873	1	0.15454
ENST00000220849	1.98312	0.0732	0.32687	0.38631	0.94109	0.96584	-0.08024	-0.23676	0.99999	0.21875	0.56098	0.99782	0.06651	0.02935	1	-0.1043	-0.42565	0.99955	1.01626	2.68025	0.10371	-0.46655	-1.11404	0.92401	-0.16757	-0.36345	0.99982	-0.31981	-0.8717	0.97671	-0.49061	-1.31994	0.8428	0.62994	1.76101	0.57475	0.29898	0.75575	0.98889	0.14675	0.25442	0.99998	-0.02406	-0.17077	1	1.0965	2.75881	0.08475	-0.15224
ENST00000220853	0.5022	0.80544	0.93441	-0.09859	-1.51422	0.73633	-0.06398	-1.07968	0.93404	-0.08776	-1.20326	0.89299	-0.04998	-0.77003	0.9877	-0.04562	-0.73516	0.99038	-0.06324	-1.2777	0.86217	0.03461	0.33068	0.9999	0.01083	0.28693	0.99995	0.04861	0.68589	0.99337	0.05297	0.72047	0.99136	0.03535	0.18727	1	-0.02378	-0.05742	1	0.014	0.32296	0.99991	0.01836	0.35518	0.99984	0.00074	-0.14645	1	0.03778
ENST00000220913	6.00979	2e-05	0.00082	-0.31954	-3.5347	0.0081	0.01316	-0.49405	0.99893	-0.4278	-4.47279	0.00019	-0.24359	-2.57481	0.13633	-0.01727	-0.53291	0.99835	-0.07285	-0.56381	0.99774	0.3327	2.75417	0.08765	-0.10825	-0.96686	0.96084	0.07595	0.83241	0.98148	0.30227	2.83247	0.07123	0.24669	2.84383	0.06898	-0.44095	-3.61218	0.00617	-0.25675	-1.89895	0.48214	-0.03043	-0.0193	1	-0.08601	-0.04331	1	0.1842
ENST00000220931	0.62546	0.70954	0.89417	-0.29476	0.10367	1	1.05301	1.34702	0.82654	0.88135	1.17302	0.90142	1.24844	1.20714	0.88784	0.87485	0.88978	0.97275	0.81881	0.67722	0.99343	1.34777	1.27853	0.85878	1.17611	1.09707	0.92664	1.5432	1.13507	0.9139	1.16961	0.81345	0.98271	1.11357	0.59584	0.99675	-0.17166	-0.23835	0.99998	0.19543	-0.15661	1	-0.17816	-0.44304	0.99936	-0.2342	-0.65408	0.99442	0.36709
ENST00000220966	0.1823	0.98124	0.99533	0.67151	0.58989	0.99616	-0.10465	0.16058	1	-0.3613	-0.32381	0.99988	-0.6475	-0.22886	0.99998	-0.35603	-0.35776	0.99979	0.36467	0.14773	1	-0.77616	-0.39813	0.99958	-1.03281	-0.90777	0.96592	-1.31901	-0.81561	0.97972	-1.02754	-0.92586	0.96282	-0.30684	-0.40987	0.99949	-0.25666	-0.46469	0.99907	-0.54285	-0.37573	0.99972	-0.25138	-0.49312	0.99871	0.46932	-0.01196	1	-0.2862
ENST00000221086	0.16798	0.98483	0.99632	0.18004	0.16346	1	0.70773	0.74238	0.98979	0.36115	0.32201	0.99991	0.28665	0.44747	0.99939	0.09475	0.20282	0.99999	0.53833	0.75948	0.98851	0.52769	0.58457	0.99722	0.18112	0.15902	1	0.10662	0.28332	0.99996	-0.08529	0.04179	1	0.3583	0.58938	0.9971	-0.34657	-0.42921	0.99952	-0.42107	-0.31176	0.99992	-0.61298	-0.53738	0.99827	-0.1694	-0.03073	1	-0.0745
ENST00000221114	0.81921	0.55747	0.82048	-0.02391	-0.22462	0.99999	-0.05966	-0.68136	0.99356	-0.00234	-0.11025	1	-0.08663	-0.6593	0.99461	0.03963	0.94524	0.96487	0.08162	0.89644	0.97299	-0.03575	-0.46661	0.99922	0.02157	0.10946	1	-0.06272	-0.43627	0.99947	0.06354	1.14904	0.91229	0.10553	1.10318	0.92696	0.05732	0.56222	0.99777	-0.02697	0.04326	1	0.09928	1.53456	0.72378	0.14127	1.49192	0.74961	-0.08429
ENST00000221130	5.42484	6e-05	0.00217	-0.29035	-3.05467	0.03739	-0.14485	-1.35812	0.82382	-0.46421	-4.90204	2e-05	-0.40314	-4.02189	0.00122	-0.14634	-1.58986	0.68895	-0.23258	-2.31302	0.23871	0.1455	1.48443	0.7542	-0.17385	-1.86633	0.50335	-0.11279	-1.0443	0.94352	0.14401	1.34709	0.8294	0.05778	0.64868	0.99511	-0.31935	-3.20501	0.02353	-0.25828	-2.42255	0.19028	-0.00149	-0.17424	1	-0.08772	-0.84068	0.9806	0.06107
ENST00000221132	4.51102	0.00041	0.00941	0.51939	3.27221	0.02961	0.17899	1.194	0.89357	0.42591	2.62734	0.13831	0.58611	3.62524	0.01157	0.19109	1.37715	0.81154	-0.05803	-0.34153	0.99986	-0.34039	-1.86658	0.5114	-0.09348	-0.60404	0.99637	0.06672	0.42855	0.99947	-0.3283	-1.76415	0.57763	-0.57742	-3.49465	0.01561	0.24692	1.27743	0.85897	0.40712	2.23213	0.29873	0.0121	0.14082	1	-0.23703	-1.4746	0.75843	0.1602
ENST00000221138	5.03365	0.00014	0.00409	-0.31347	-3.88842	0.00201	-0.02433	-0.16358	1	-0.11176	-1.22576	0.88426	-0.23388	-2.542	0.14505	-0.00081	0.4265	0.99954	0.00685	0.02952	1	0.28914	3.43333	0.01087	0.20171	2.57819	0.13317	0.07959	1.21793	0.88738	0.31266	4.1462	0.0007	0.32032	3.76412	0.00325	-0.08743	-0.97566	0.95924	-0.20955	-2.20276	0.29437	0.02352	0.55481	0.99795	0.03118	0.18575	1	-0.12212
ENST00000221166	4.61863	0.00034	0.00801	-0.83502	-1.87015	0.50982	-0.15338	0.09115	1	-1.37361	-2.82114	0.09097	-0.09756	-0.27037	0.99996	0.5565	1.78391	0.5675	0.09401	0.75523	0.98781	0.68164	1.84277	0.52724	-0.53859	-0.96246	0.96013	0.73746	1.54085	0.71909	1.39152	3.55971	0.01629	0.92903	2.55971	0.16307	-1.22023	-2.72398	0.11321	0.05581	-0.34376	0.99985	0.70988	1.6025	0.6816	0.24739	0.62683	0.9955	1.27605
ENST00000221200	1.00304	0.42739	0.74291	-0.09547	-1.21211	0.88958	-0.12632	-1.3686	0.8185	-0.09514	-1.10914	0.92541	-0.14825	-1.66323	0.64087	-0.11487	-1.36334	0.82121	-0.17582	-2.333	0.22912	-0.03085	-0.2295	0.99999	0.00034	0.08487	1	-0.05278	-0.48355	0.99906	-0.0194	-0.18739	1	-0.08035	-1.14437	0.91416	0.03119	0.30609	0.99993	-0.02193	-0.23221	0.99999	0.01145	0.04645	1	-0.0495	-0.85227	0.9792	-0.05311
ENST00000221232	0.78784	0.58137	0.83278	-0.48982	-0.99711	0.95259	0.52459	0.32251	0.9999	-0.07883	-0.53915	0.99809	-0.45907	-1.10747	0.9231	-0.6622	-1.53798	0.72107	0.02524	-0.20728	0.99999	1.01441	1.22463	0.88099	0.411	0.43138	0.99947	0.03076	-0.14095	1	-0.17238	-0.58103	0.99717	0.51507	0.74505	0.98901	-0.60342	-0.80645	0.98309	-0.98366	-1.32111	0.83854	-1.18679	-1.70851	0.61366	-0.49935	-0.50097	0.99872	-0.38024
ENST00000221233	1.21123	0.30652	0.6498	-0.131	-0.8899	0.97401	-0.2906	-2.28406	0.25359	-0.09915	-0.36022	0.99983	-0.2009	-1.57032	0.70142	-0.12598	-0.80053	0.98489	-0.20071	-1.48899	0.75143	-0.1596	-1.44057	0.77948	0.03185	0.51202	0.99869	-0.06991	-0.70532	0.99226	0.00502	0.06196	1	-0.06971	-0.6213	0.99613	0.19145	1.90022	0.48103	0.08969	0.7306	0.99066	0.16462	1.45715	0.77005	0.08989	0.82073	0.98281	-0.10176
ENST00000221249	0.67471	0.67029	0.87695	-0.84676	-0.1185	1	1.01539	0.50692	0.99821	-0.56238	-0.76533	0.98603	-0.06893	1.04024	0.93702	0.45226	0.87136	0.97213	-0.08085	0.1873	1	1.86215	0.63058	0.99433	0.28438	-0.68793	0.99232	0.77783	1.20642	0.88408	1.29902	1.02116	0.94296	0.76591	0.31192	0.99991	-1.57777	-1.19182	0.88505	-1.08432	0.44116	0.99917	-0.56313	0.31041	0.99989	-1.09624	-0.32445	0.99986	0.49345
ENST00000221264	0.73276	0.62415	0.85429	-0.35768	-0.73012	0.9861	-0.62239	-0.69951	0.98926	0.25274	0.84216	0.97135	-0.59914	-1.04683	0.92808	0.27201	0.34889	0.99974	0.34884	1.0656	0.92019	-0.26471	-0.02492	1	0.61042	1.57125	0.7028	-0.24146	-0.32953	0.99982	0.62969	1.0481	0.92643	0.70652	1.77304	0.59804	0.87513	1.47395	0.75278	0.02325	-0.28049	0.99993	0.8944	0.99338	0.94268	0.97123	1.6771	0.64634	-0.85188
ENST00000221265	0.28166	0.94451	0.98445	-0.04644	-0.46895	0.99921	-0.07678	-0.93515	0.96686	-0.06295	-0.59098	0.99708	-0.04078	-0.45111	0.99937	-0.088	-1.15682	0.90997	-0.06141	-0.46507	0.99925	-0.03034	-0.49028	0.99898	-0.01651	-0.12628	1	0.00566	0.00311	1	-0.04156	-0.69424	0.99294	-0.01496	-0.00858	1	0.01383	0.36544	0.99981	0.036	0.47952	0.9991	-0.01122	-0.17727	1	0.01538	0.47107	0.99919	0.02217
ENST00000221315	1.07684	0.38144	0.7105	-0.05047	-0.34628	0.99986	-0.10477	-0.58401	0.9972	-0.0845	-0.58549	0.99716	0.4527	1.52472	0.72949	-0.08366	-0.4321	0.99949	-0.17327	-0.75563	0.98869	-0.05429	-0.2579	0.99998	-0.03403	-0.2439	0.99998	0.50317	1.83846	0.52497	-0.03318	-0.09528	1	-0.1228	-0.41437	0.9996	0.02027	0.02433	1	0.55747	1.98332	0.43026	0.02111	0.16149	1	-0.06851	-0.13605	1	0.5372
ENST00000221327	0.50997	0.79984	0.93251	-0.5236	-0.91999	0.96711	-0.81295	-1.21136	0.88606	-0.43322	-0.43862	0.99939	-0.23994	-0.34259	0.99985	0.01747	0.25793	0.99997	-0.81735	-0.84925	0.9781	-0.28935	-0.33521	0.99987	0.09039	0.47323	0.99907	0.28366	0.55279	0.99774	0.54108	1.14304	0.9107	-0.29374	0.06353	1	0.37974	0.78278	0.98559	0.57301	0.85372	0.97741	0.83043	1.41453	0.79126	-0.00439	0.39337	0.99969	0.19327
ENST00000221355	0.81259	0.56231	0.82275	0.26936	1.95778	0.49835	0.09566	0.88279	0.96574	-0.16596	0.30496	0.99989	-0.55231	0.33545	0.99981	-0.74308	-0.34008	0.99982	-1.0199	-0.27439	0.99995	-0.17369	-0.94275	0.95296	-0.43532	-1.62127	0.67603	-0.82166	-1.58561	0.69461	-1.01244	-2.22849	0.35779	-1.28926	-2.18808	0.37262	-0.26163	-0.58404	0.99558	-0.64797	-0.55368	0.99673	-0.83875	-1.16938	0.89069	-1.11556	-1.12592	0.90623	-0.38634
ENST00000221418	16.9236	0	0	0.65177	5.78118	0	0.06436	0.39816	0.99969	0.85226	7.57562	0	0.41352	3.67638	0.00445	0.10982	0.85583	0.97881	0.09303	0.45028	0.99937	-0.58741	-4.96866	1e-05	0.20048	1.90073	0.4798	-0.23825	-1.91361	0.47119	-0.54195	-4.70193	5e-05	-0.55874	-5.10588	1e-05	0.7879	6.6602	0	0.34916	3.03024	0.0394	0.04546	0.40794	0.99965	0.02867	0.03435	1	-0.43873
ENST00000221419	0.42088	0.86369	0.95534	-0.2586	-1.12421	0.92053	0.13152	0.22679	0.99999	0.04657	-0.29928	0.99994	-0.02948	-0.29747	0.99994	-0.17793	-0.80416	0.98452	0.03707	-0.09925	1	0.39012	1.25967	0.86982	0.30516	0.79186	0.9857	0.22912	0.7809	0.9867	0.08067	0.28266	0.99996	0.29567	0.98271	0.95761	-0.08495	-0.49765	0.99888	-0.161	-0.4944	0.99892	-0.30944	-0.96314	0.96153	-0.09444	-0.31143	0.99993	-0.07605
ENST00000221431	1.4925	0.18787	0.52401	-0.32688	-1.38126	0.8116	-0.52102	-2.43626	0.18646	-0.47461	-2.36028	0.21876	-0.38789	-1.6989	0.61729	-0.12235	-0.94173	0.96547	-0.24961	-0.91582	0.96992	-0.19414	-1.12983	0.91867	-0.14773	-0.99516	0.95489	-0.06101	-0.36134	0.99982	0.20453	0.38278	0.99975	0.07727	0.42415	0.99955	0.04642	0.17425	1	0.13313	0.75267	0.98903	0.39868	1.44788	0.77525	0.27141	1.50109	0.74416	0.08672
ENST00000221444	3.137	0.00728	0.07882	-0.37316	-3.72223	0.00377	-0.137	-1.48539	0.75371	-0.30793	-2.99145	0.04432	-0.35276	-3.28244	0.01794	-0.26806	-2.80369	0.07505	-0.21721	-2.14059	0.32889	0.23616	1.96038	0.44036	0.06524	0.66962	0.9942	0.0204	0.32726	0.9999	0.1051	0.77374	0.98743	0.15595	1.45815	0.76965	-0.17092	-1.30701	0.84893	-0.21576	-1.60283	0.68057	-0.13106	-1.17058	0.90523	-0.08021	-0.55197	0.99801	-0.04483
ENST00000221448	0.31992	0.92551	0.9774	-0.33363	-0.92212	0.96908	-0.28402	-0.91492	0.97026	-0.24513	-0.7932	0.98565	-0.42336	-1.20344	0.89297	-0.31755	-0.98909	0.95642	-0.4212	-1.10357	0.92715	0.04961	-0.05037	1	0.0885	0.11161	1	-0.08973	-0.30561	0.99993	0.01608	-0.09314	1	-0.08757	-0.1982	0.99999	0.03889	0.15422	1	-0.13934	-0.23759	0.99999	-0.03352	-0.03838	1	-0.13718	-0.13629	1	-0.17823
ENST00000221452	1.10582	0.36294	0.69518	-0.78255	-2.02315	0.40405	-0.29034	-0.95189	0.96319	0.05372	-0.73733	0.98997	0.22928	-0.27564	0.99996	-0.5035	-1.541	0.71964	-0.00791	-0.17276	1	0.49221	0.92618	0.96794	0.83627	1.20014	0.89327	1.01183	1.60413	0.67992	0.27905	0.40251	0.99966	0.77463	1.75319	0.58137	0.34406	0.22708	0.99999	0.51962	0.63606	0.99547	-0.21317	-0.51932	0.99855	0.28242	0.75181	0.98893	0.17556
ENST00000221455	1.41701	0.2135	0.5557	-0.01609	-0.09813	1	-0.80957	-1.93003	0.47066	-0.12472	-0.47439	0.99905	-0.46622	-1.17149	0.90105	-0.57671	-1.62672	0.66608	0.14645	0.32043	0.9999	-0.79349	-1.82388	0.53887	-0.10864	-0.37502	0.99975	-0.45014	-1.06732	0.93423	-0.56062	-1.52001	0.73166	0.16254	0.41213	0.99958	0.68485	1.44064	0.77729	0.34335	0.77735	0.9862	0.23286	0.33251	0.99988	0.95602	2.15383	0.33864	-0.3415
ENST00000221459	2.75639	0.01584	0.13278	-0.12434	-0.66192	0.9945	-0.08431	-1.46174	0.76732	-0.47336	-3.40223	0.01275	-0.02937	-0.14803	1	-0.06048	-0.34603	0.99986	-0.10925	-0.88074	0.97531	0.04003	-0.84373	0.98013	-0.34903	-2.70512	0.09925	0.09496	0.48466	0.99903	0.06386	0.2902	0.99995	0.01508	-0.23895	0.99998	-0.38905	-1.65975	0.64331	0.05494	1.2668	0.86665	0.02383	1.08622	0.93198	-0.02494	0.59876	0.99683	0.44399
ENST00000221462	2.42382	0.0312	0.20187	-0.20004	-1.86953	0.50115	0.05895	0.42632	0.99954	-0.01526	0.06504	1	-0.29588	-2.61786	0.12158	-0.02922	-0.18398	1	-0.04715	-0.61996	0.99619	0.25899	2.14681	0.32598	0.18477	1.88426	0.49126	-0.09584	-0.79737	0.98525	0.17082	1.60598	0.67854	0.15288	1.17875	0.90218	-0.07422	-0.35693	0.99984	-0.35483	-2.83266	0.07015	-0.08817	-0.58113	0.99734	-0.10611	-0.98801	0.95663	-0.28062
ENST00000221466	1.77454	0.11146	0.40515	0.23244	1.53131	0.72561	0.2063	1.46619	0.7644	0.24954	1.41491	0.7932	0.49326	2.60612	0.13186	0.30346	1.99989	0.41828	0.39419	2.76068	0.08964	-0.02614	0.02691	1	0.0171	-0.0951	1	0.26082	1.12428	0.91956	0.07102	0.50718	0.99873	0.16175	1.25189	0.8724	0.04324	-0.11639	1	0.28696	1.04035	0.94363	0.09716	0.4538	0.99933	0.18789	1.1586	0.9084	0.24372
ENST00000221476	0.95716	0.45809	0.76296	0.03042	0.22092	0.99999	0.11912	0.89953	0.97275	0.03354	0.08905	1	-0.11098	-1.01956	0.94971	0.14294	1.01354	0.95111	0.14712	0.8665	0.97744	0.0887	0.6894	0.99322	0.00312	-0.12557	1	-0.1414	-1.22157	0.88604	0.11252	0.79506	0.98552	0.1167	0.65085	0.99504	-0.08558	-0.79167	0.98584	-0.2301	-1.80684	0.54334	0.02382	0.07718	1	0.028	-0.05824	1	-0.14452
ENST00000221480	1.05918	0.39192	0.71844	-0.25991	-0.45713	0.99923	-0.11297	0.14985	1	-0.63047	-0.77014	0.98665	0.0231	0.4162	0.99954	0.76927	0.92065	0.9663	-0.98414	-1.35673	0.82148	0.14694	0.57904	0.9971	-0.37056	-0.31355	0.99991	0.28302	0.86045	0.97616	1.02918	1.34296	0.82654	-0.72423	-0.90569	0.97007	-0.5175	-0.87121	0.97502	0.13607	0.24608	0.99998	0.88224	0.73277	0.98939	-0.87118	-1.42244	0.78717	0.65358
ENST00000221485	3.95042	0.00135	0.02327	0.31986	2.52341	0.1628	-0.00375	0.58723	0.99707	0.4949	3.1495	0.03463	0.66006	4.12212	0.00172	0.36138	2.44011	0.19312	0.24464	1.78299	0.56237	-0.32362	-1.77415	0.56865	0.17504	0.65562	0.99454	0.34019	1.66798	0.63921	0.04152	0.00795	1	-0.07522	-0.65611	0.99456	0.49866	2.37185	0.22277	0.66381	3.30766	0.02297	0.36514	1.72399	0.60181	0.2484	1.10549	0.9251	0.16515
ENST00000221494	2.40506	0.0313	0.20227	-0.21593	-1.60351	0.68014	0.15776	0.67538	0.9939	-0.13905	-0.9557	0.96308	-0.26527	-1.90619	0.47665	0.04121	0.27679	0.99996	0.11124	0.97552	0.9592	0.37369	2.14344	0.32809	0.07687	0.62171	0.99613	-0.04935	-0.34486	0.99987	0.25713	1.80977	0.54171	0.32717	2.50882	0.15717	-0.29681	-1.54381	0.71811	-0.42303	-2.41273	0.19441	-0.11656	-0.39507	0.9997	-0.04652	0.24999	0.99998	-0.12622
ENST00000221496	0.42905	0.85804	0.9536	-0.2304	-0.65526	0.99442	0.39021	0.37065	0.99977	-0.36291	-0.89525	0.97178	0.1385	0.12667	1	-0.22674	-0.65747	0.99435	-0.16843	-0.69805	0.9922	0.62061	0.96383	0.95919	-0.13252	-0.24868	0.99998	0.36889	0.75285	0.98818	0.00365	-0.02471	1	0.06196	-0.06645	1	-0.75312	-1.17727	0.89909	-0.25171	-0.24195	0.99998	-0.61695	-0.95756	0.96059	-0.55864	-0.998	0.952	0.50141
ENST00000221504	0.98215	0.44143	0.75141	0.51392	0.76844	0.98738	-1.0174	-1.05887	0.93896	0.64597	0.82767	0.98145	1.18855	0.96607	0.95931	0.01839	0.06369	1	-0.01468	-0.12679	1	-1.53132	-1.79388	0.55474	0.13205	0.0716	1	0.67463	0.26282	0.99997	-0.49553	-0.66967	0.99393	-0.5286	-0.87538	0.97546	1.66337	1.81904	0.53812	2.20596	1.88202	0.49877	1.03579	1.06682	0.93677	1.00272	0.90569	0.97127	0.54259
ENST00000221543	1.6897	0.13062	0.43893	-0.62583	-1.86929	0.50203	-0.70969	-2.02401	0.40096	-0.03896	0.29075	0.99995	-0.64384	-1.86747	0.5033	-0.27289	-1.19694	0.89512	-0.33747	-0.9536	0.96332	-0.08385	-0.25191	0.99998	0.58687	2.11805	0.34413	-0.01801	-0.05039	1	0.35295	0.58992	0.99709	0.28836	0.85903	0.97825	0.67072	2.26101	0.26577	0.06585	0.19725	1	0.4368	0.80095	0.98483	0.37222	1.06031	0.93921	-0.60488
ENST00000221554	0.36675	0.89849	0.96845	-0.08246	-0.4515	0.99935	0.27035	0.83498	0.98089	-0.06811	-0.25561	0.99998	0.09828	-0.42036	0.99956	0.08789	-0.06013	1	-0.08031	-0.46403	0.99924	0.35282	1.24332	0.87596	0.01436	0.18672	1	0.18074	0.00842	1	0.17035	0.37043	0.99979	0.00215	-0.02418	1	-0.33846	-1.05269	0.94056	-0.17208	-1.18377	0.8992	-0.18246	-0.85778	0.97809	-0.35067	-1.2396	0.87759	0.16639
ENST00000221561	5.58751	5e-05	0.00168	-0.56423	-3.10762	0.03259	-0.1188	-0.71681	0.99155	-0.42856	-2.1555	0.32218	-0.77242	-3.92891	0.00189	0.03957	0.16894	1	0.11356	0.196	1	0.44543	2.14917	0.32571	0.13567	0.91004	0.97094	-0.20819	-0.90519	0.97171	0.60379	3.12336	0.0311	0.67779	3.16043	0.02776	-0.30976	-1.28207	0.85999	-0.65362	-2.92596	0.05523	0.15837	0.84588	0.97987	0.23236	0.873	0.97636	-0.34386
ENST00000221566	0.8551	0.53056	0.80656	-0.07449	-1.08173	0.9336	-0.00968	-0.02173	1	0.03037	0.57625	0.99747	-0.10922	-1.3357	0.83517	0.00572	-0.03751	1	-0.01234	-0.26587	0.99997	0.06481	0.98422	0.95751	0.10486	1.62445	0.66646	-0.03473	-0.28164	0.99996	0.08021	0.99957	0.95422	0.06215	0.77873	0.987	0.04006	0.55843	0.99788	-0.09954	-1.22515	0.88455	0.0154	-0.0141	1	-0.00266	-0.22725	0.99999	-0.13959
ENST00000221573	4.05749	0.00107	0.01959	0.37741	1.31408	0.84296	-1.05557	-2.99119	0.05223	0.07805	0.579	0.99722	-0.05038	0.2834	0.99995	-0.11124	-0.37162	0.99978	0.23278	1.03908	0.94304	-1.43297	-4.2048	0.00123	-0.29936	-0.70756	0.99165	-0.42778	-0.99171	0.95391	-0.48865	-1.62554	0.66653	-0.14462	-0.22755	0.99999	1.13361	3.45667	0.01417	1.00519	3.15578	0.03421	0.94433	2.49704	0.17091	1.28835	3.84469	0.00407	-0.12842
ENST00000221576	1.88961	0.08903	0.35995	0.7526	1.97146	0.48991	-0.88712	-0.99784	0.94805	-0.74339	-0.21384	0.99999	-1.23961	-1.32086	0.83365	-0.62843	-0.67673	0.99231	0.52281	1.2589	0.85614	-1.63972	-2.92503	0.14036	-1.49599	-2.20944	0.37208	-1.99221	-3.37079	0.07605	-1.38104	-2.61972	0.21855	-0.22979	-0.56623	0.99612	0.14373	0.79832	0.9827	-0.35249	-0.25872	0.99997	0.25869	0.32076	0.99989	1.40993	2.17196	0.37271	-0.49622
ENST00000221665	1.48955	0.18891	0.52537	-0.20255	-1.70373	0.61396	0.08825	0.39481	0.9997	-0.05015	-0.2375	0.99999	-0.21539	-1.66236	0.64162	-0.09895	-0.74576	0.98956	0.05707	0.35754	0.99983	0.29081	1.96117	0.44134	0.15241	1.42724	0.78684	-0.01284	-0.01003	1	0.1036	0.89837	0.97271	0.25963	1.99503	0.41936	-0.1384	-0.60642	0.9966	-0.30364	-1.91955	0.46868	-0.1872	-1.07203	0.93595	-0.03118	-0.05048	1	-0.16524
ENST00000221671	1.42354	0.21262	0.55494	-0.08116	-0.61842	0.99615	-0.09799	-1.01164	0.95074	0.02007	0.09085	1	-0.09803	-0.98489	0.95658	0.11304	1.23209	0.88062	-0.1549	-1.31322	0.84503	-0.01683	-0.43057	0.9995	0.10123	0.68788	0.9931	-0.01687	-0.38395	0.99974	0.1942	1.80742	0.54513	-0.07374	-0.70764	0.992	0.11806	1.068	0.93646	-4e-05	0.05638	1	0.21103	2.11488	0.34905	-0.05691	-0.24351	0.99998	-0.1181
ENST00000221735	0.72789	0.6281	0.85611	-0.44512	-1.18246	0.883	-0.83907	-2.05282	0.44807	0.18969	0.06627	1	-0.20664	-1.0426	0.92816	-0.65609	-0.76728	0.98288	0.00139	-0.07155	1	-0.39395	-0.94655	0.95498	0.63481	1.25103	0.85479	0.23848	0.12786	1	-0.21097	0.35036	0.99977	0.4465	1.04934	0.92727	1.02876	2.11207	0.42516	0.63243	1.05509	0.92708	0.18297	1.2302	0.8686	0.84045	1.89928	0.5254	-0.39633
ENST00000221784	0.6769	0.66853	0.87598	-0.29187	-0.44156	0.99897	-0.30484	-0.14491	1	0.28449	0.88177	0.96386	-0.53097	-1.10902	0.90743	0.40393	1.10083	0.90753	-0.54713	-0.88957	0.96479	-0.01297	0.26323	0.99995	0.57637	1.32054	0.82381	-0.2391	-0.67862	0.99011	0.69581	1.53245	0.72302	-0.25525	-0.4789	0.99853	0.58933	0.95564	0.94887	-0.22614	-0.88623	0.9643	0.70877	1.14931	0.89165	-0.24229	-0.69836	0.989	-0.81547
ENST00000221801	0.93896	0.46984	0.77062	0.9969	1.48207	0.75543	-0.29063	-0.52885	0.99843	-0.11484	-0.29049	0.99995	0.49957	0.6753	0.99388	-0.10524	-0.33791	0.99988	0.47966	0.63548	0.99561	-1.28753	-1.89546	0.48453	-1.11174	-1.72043	0.60276	-0.49732	-0.76065	0.98837	-1.10213	-1.74666	0.58501	-0.51724	-0.81027	0.98385	0.17579	0.24454	0.99998	0.79021	1.13018	0.91862	0.1854	0.19219	1	0.77029	1.0967	0.92903	0.61442
ENST00000221855	1.26007	0.28093	0.62568	0.33801	1.1121	0.92414	0.1304	0.29592	0.99994	-0.17902	-0.60947	0.9965	0.46467	1.64234	0.65493	0.28184	0.57375	0.9975	0.36848	1.3927	0.80556	-0.20762	-0.73935	0.98999	-0.51704	-1.68451	0.62693	0.12666	0.56299	0.99773	-0.05618	-0.49003	0.99897	0.03046	0.30051	0.99994	-0.30942	-0.85131	0.97918	0.33427	1.25073	0.87334	0.15144	0.25175	0.99998	0.23808	1.01049	0.95139	0.64369
ENST00000221859	0.9181	0.4851	0.7799	0.01176	-0.08862	1	0.10356	0.59406	0.99698	0.07973	0.27198	0.99997	0.03138	0.04682	1	0.05129	0.29831	0.99994	0.34811	1.94306	0.45254	0.09179	0.66877	0.99421	0.06797	0.35362	0.99984	0.01962	0.13072	1	0.03952	0.37902	0.99977	0.33634	2.00481	0.41265	-0.02382	-0.32718	0.9999	-0.07217	-0.52721	0.99845	-0.05227	-0.29584	0.99995	0.24455	1.24116	0.87774	-0.04835
ENST00000221922	1.16553	0.33047	0.67021	0.03753	0.45398	0.99932	0.30927	0.83647	0.98061	0.32251	0.95785	0.9619	0.69215	2.15172	0.33174	-0.18237	-0.28767	0.99995	0.05381	0.81006	0.98364	0.27174	0.41579	0.99959	0.28498	0.51176	0.99865	0.65462	1.71488	0.60801	-0.2199	-0.72424	0.99091	0.01628	0.36155	0.99982	0.01324	0.0682	1	0.38287	1.2087	0.88906	-0.49165	-1.07628	0.93402	-0.25546	-0.07519	1	0.36964
ENST00000221930	3.78595	0.00191	0.03009	0.40693	2.39423	0.2031	0.47674	2.78198	0.0814	0.53686	3.2046	0.0242	0.62819	3.42679	0.01188	0.69758	4.08437	0.00102	0.48993	2.93902	0.05302	0.06981	0.54082	0.99821	0.12993	0.83875	0.98072	0.22126	1.12481	0.92022	0.29065	1.76602	0.57187	0.083	0.60579	0.99662	0.06012	0.25705	0.99998	0.15145	0.54106	0.9982	0.22084	1.14551	0.91351	0.01319	0.04181	1	0.09133
ENST00000221943	0.56747	0.75535	0.91456	0.19292	0.809	0.98378	-0.22894	-0.60229	0.99668	0.1244	0.33398	0.99989	-0.17154	-0.58753	0.9971	0.13826	0.62229	0.99602	-0.04186	0.00383	1	-0.42186	-1.35695	0.82362	-0.06852	-0.45241	0.99933	-0.36446	-1.35939	0.82227	-0.05466	-0.15889	1	-0.23478	-0.78229	0.9864	0.35334	0.89839	0.9724	0.0574	0.0284	1	0.3672	1.1648	0.90636	0.18709	0.58966	0.99706	-0.29594
ENST00000221957	1.60677	0.15255	0.47372	-0.22945	-0.35736	0.99984	0.09944	0.23543	0.99999	1.15294	2.20797	0.29269	-0.09235	-0.04555	1	0.51568	1.4008	0.80152	0.47324	0.9377	0.96638	0.32889	0.56595	0.9977	1.3824	2.52625	0.15175	0.13711	0.29998	0.99994	0.74514	1.73579	0.59203	0.70269	1.27605	0.86291	1.0535	1.86456	0.50483	-0.19179	-0.27134	0.99997	0.41624	1.08597	0.93225	0.3738	0.65354	0.9949	-1.24529
ENST00000221978	10.1888	0	0	1.64334	4.61528	0.00114	0.2637	1.19701	0.89224	2.26982	5.9474	0.0001	1.71322	4.97171	0.00056	0.43559	1.1857	0.89637	0.26148	0.57627	0.99725	-1.37963	-3.20872	0.04331	0.62649	1.47806	0.75339	0.06988	0.46774	0.99902	-1.20774	-3.26256	0.039	-1.38186	-3.8763	0.00815	2.00612	4.53461	0.0025	1.44951	3.58682	0.01889	0.17189	-0.0241	1	-0.00222	-0.60279	0.99645	-0.55661
ENST00000222005	0.84555	0.53763	0.80995	0.05154	0.7061	0.99228	-0.05758	-0.77223	0.98756	0.09636	1.4205	0.79091	0.01982	0.37889	0.99977	0.00759	0.06271	1	0.01261	0.09418	1	-0.10912	-1.42232	0.7899	0.04482	0.71557	0.9917	-0.03172	-0.3033	0.99994	-0.04395	-0.61541	0.99635	-0.03893	-0.58717	0.99719	0.15394	2.0815	0.36381	0.07739	1.09874	0.92868	0.06517	0.80237	0.9848	0.07018	0.83481	0.98134	-0.07654
ENST00000222008	3.61823	0.00268	0.03838	-0.0663	-0.54184	0.9982	0.06611	0.98043	0.95819	-0.10507	-0.9818	0.95792	0.05869	0.82791	0.98206	0.17222	2.06316	0.3757	0.26413	2.81953	0.07276	0.13241	1.47376	0.76048	-0.03877	-0.44084	0.99944	0.12499	1.33749	0.83413	0.23852	2.56008	0.13968	0.33043	3.3172	0.0164	-0.17118	-1.86666	0.50316	-0.00742	-0.17414	1	0.10611	0.97742	0.95881	0.19802	1.69115	0.6222	0.16376
ENST00000222120	0.95106	0.46208	0.76598	0.24246	1.37707	0.81353	-0.10614	0.32639	0.9999	0.22307	1.414	0.79385	0.2194	1.39462	0.80424	-0.06396	0.38861	0.99973	-0.15082	-0.17908	1	-0.3486	-0.97761	0.95837	-0.01939	0.0559	1	-0.02306	0.05946	1	-0.30642	-0.95685	0.96251	-0.39328	-1.51766	0.73402	0.32921	1.01832	0.94941	0.32554	1.00765	0.95183	0.04218	0.04854	1	-0.04468	-0.48704	0.999	-0.00367
ENST00000222122	1.94088	0.08125	0.34402	-0.09829	-0.71225	0.99188	0.28929	1.45444	0.77167	0.11126	0.88509	0.97479	-0.20801	-1.17769	0.90254	0.23356	1.22226	0.88557	0.20057	0.81333	0.98364	0.38759	2.09236	0.35806	0.20955	1.56615	0.70408	-0.10971	-0.47878	0.99911	0.33185	1.88639	0.48987	0.29886	1.48483	0.75397	-0.17804	-0.61454	0.99636	-0.4973	-2.49124	0.16366	-0.05573	-0.27201	0.99997	-0.08873	-0.6443	0.99528	-0.31926
ENST00000222139	2.1687	0.05186	0.27086	-2.16232	-2.77707	0.16783	-2.31264	-3.11278	0.09525	-2.30343	-3.07028	0.10601	-1.9595	-2.80079	0.16373	-1.34013	-1.30923	0.8341	-1.02507	-0.98506	0.94636	-0.15032	-0.49571	0.99873	-0.1411	-0.32673	0.99988	0.20282	-0.10257	1	0.82219	1.34805	0.82198	1.13725	1.65747	0.64961	0.00922	0.18346	1	0.35314	0.38256	0.9997	0.97251	1.74451	0.59504	1.28757	2.04143	0.41998	0.34393
ENST00000222145	4.26461	0.00071	0.01427	0.62199	3.90987	0.00197	0.33924	2.10432	0.35114	0.59512	4.07676	0.00101	0.55854	3.37032	0.01401	0.24082	1.7359	0.592	0.47192	2.81687	0.07357	-0.28275	-1.55768	0.70941	-0.02687	0.2126	0.99999	-0.06345	-0.3961	0.9997	-0.38117	-2.06159	0.37712	-0.15007	-0.97095	0.96004	0.25588	1.74128	0.58846	0.21929	1.13451	0.91725	-0.09842	-0.42381	0.99956	0.13268	0.60093	0.99678	-0.03658
ENST00000222214	1.26919	0.27787	0.62291	0.21762	0.83407	0.98095	-0.11821	-0.30903	0.99993	0.4666	2.20926	0.29839	0.21196	0.94722	0.96392	0.16317	0.09512	1	0.11803	0.56118	0.99775	-0.33583	-1.07906	0.93327	0.24898	1.36787	0.81752	-0.00566	0.13833	1	-0.05445	-0.69629	0.99261	-0.0996	-0.24834	0.99998	0.58482	2.36104	0.22434	0.33017	1.17891	0.90086	0.28139	0.38205	0.99975	0.23624	0.82147	0.98243	-0.25464
ENST00000222219	0.70266	0.6481	0.86551	0.02137	0.39229	0.99972	-0.08633	-0.37919	0.99977	0.06137	0.43801	0.99946	0.17389	1.29993	0.85195	0.07059	0.77856	0.98695	0.00213	-0.39583	0.9997	-0.1077	-0.74091	0.98995	0.03999	0.05107	1	0.15252	0.91247	0.97055	0.04922	0.3949	0.9997	-0.01925	-0.76835	0.98783	0.14769	0.77695	0.98709	0.26022	1.5794	0.69565	0.15692	1.09076	0.93081	0.08845	-0.00597	1	0.11252
ENST00000222224	2.74211	0.01629	0.13513	-0.27983	-2.58535	0.13461	-0.16699	-1.65008	0.64985	-0.04287	-0.19901	0.99999	-0.32699	-2.91672	0.05828	-0.08107	-0.77916	0.98678	-0.08312	-0.37542	0.99978	0.11284	0.7559	0.98873	0.23696	2.31814	0.23935	-0.04716	-0.40905	0.99963	0.19876	1.69865	0.61754	0.19671	2.11709	0.34541	0.12412	1.42746	0.78653	-0.16	-1.11662	0.92263	0.08592	0.86082	0.9779	0.08387	1.24716	0.87488	-0.28411
ENST00000222247	0.40258	0.87582	0.9601	-0.07731	-0.88815	0.97443	-0.13264	-1.31575	0.84484	-0.05862	-0.94261	0.9656	-0.10677	-1.16221	0.90821	-0.04707	-0.5318	0.99839	-0.07027	-1.0374	0.9454	-0.05533	-0.48157	0.99908	0.01869	-0.06743	1	-0.02946	-0.29818	0.99994	0.03024	0.32325	0.99991	0.00704	-0.17903	1	0.07402	0.4101	0.99964	0.02587	0.18776	1	0.08557	0.77002	0.98775	0.06237	0.29922	0.99994	-0.04815
ENST00000222250	3.06791	0.00837	0.08662	-0.59845	-2.95142	0.04986	-0.21196	-1.14599	0.91371	-0.34588	-1.70901	0.61003	-0.54558	-2.94214	0.05122	-0.20946	-0.84674	0.97992	0.01112	0.12268	1	0.3865	1.58732	0.69058	0.25257	1.18953	0.89832	0.05287	-0.08504	1	0.38899	1.98827	0.4223	0.60957	2.94249	0.05115	-0.13392	-0.45831	0.99931	-0.33362	-1.61963	0.66962	0.0025	0.318	0.99992	0.22308	1.21859	0.88715	-0.1997
ENST00000222256	0.32985	0.91987	0.97535	0.18867	0.65979	0.99452	0.13503	0.51304	0.99865	0.09024	0.37587	0.99977	-0.0682	-0.52582	0.99844	0.18784	0.60881	0.99648	0.16062	0.23495	0.99999	-0.05364	-0.10158	1	-0.09843	-0.27164	0.99997	-0.25687	-1.14518	0.91293	-0.00084	-0.02806	1	-0.02806	-0.3975	0.99969	-0.04478	-0.15451	1	-0.20323	-0.9758	0.95853	0.05281	0.07214	1	0.02559	-0.27454	0.99996	-0.15845
ENST00000222266	1.50845	0.1824	0.51672	-0.35659	-0.57997	0.99719	-0.73252	-1.3159	0.84244	0.33557	0.53706	0.99815	1.02345	1.46655	0.76228	0.08576	-0.27436	0.99996	-0.35695	-0.94276	0.96415	-0.37593	-0.76658	0.98745	0.69217	1.09396	0.92742	1.38004	1.99535	0.43291	0.44235	0.27341	0.99996	-0.00036	-0.38375	0.99973	1.06809	1.78189	0.56478	1.75597	2.61684	0.14468	0.81828	0.98622	0.9555	0.37557	0.37688	0.99976	0.68788
ENST00000222271	3.06422	0.00794	0.08353	-0.31099	-0.46568	0.99916	2.24936	2.07757	0.40856	1.21327	1.57279	0.69978	0.79849	1.08027	0.92924	2.64749	2.36036	0.28478	4.13333	4.76103	0.02289	2.56035	2.48482	0.22668	1.52427	2.01832	0.42545	1.10948	1.52451	0.72851	2.95848	2.78175	0.14939	4.44432	5.33078	0.013	-1.03609	-0.60975	0.99538	-1.45087	-1.046	0.93431	0.39813	0.20022	0.99999	1.88397	1.78921	0.59337	-0.41479
ENST00000222284	1.09623	0.36858	0.69976	-0.15925	-0.93428	0.96691	-0.15915	-0.78992	0.98591	-0.3897	-1.56205	0.70666	-0.0203	-0.40013	0.99968	-0.15518	-0.86748	0.97718	0.48637	0.85727	0.97848	0.0001	0.08881	1	-0.23044	-0.61914	0.9962	0.13895	0.49383	0.99893	0.00408	0.04161	1	0.64563	1.71218	0.60819	-0.23054	-0.67118	0.9941	0.13885	0.38134	0.99976	0.00398	-0.04742	1	0.64552	1.54391	0.71801	0.36939
ENST00000222305	3.8728	0.00156	0.0259	-0.34303	-2.79749	0.07829	0.10653	0.84301	0.98021	-0.07655	-0.19035	1	-0.30266	-2.37719	0.21087	0.0349	0.28196	0.99996	0.07416	0.2399	0.99998	0.44956	3.40805	0.01264	0.26648	2.5427	0.14681	0.04036	0.32977	0.9999	0.37793	2.95476	0.05096	0.41719	2.91729	0.05659	-0.18308	-1.00274	0.95322	-0.4092	-3.01161	0.04363	-0.07163	-0.55121	0.998	-0.03238	-0.59137	0.99704	-0.22611
ENST00000222307	0.49343	0.81224	0.93648	-0.15677	-0.65133	0.99475	-0.16495	-0.53988	0.99814	-0.36153	-1.30817	0.84641	-0.19251	-0.73562	0.98989	0.01814	0.08845	1	0.00261	-0.01374	1	-0.00819	0.07179	1	-0.20477	-0.65178	0.99475	-0.03574	-0.09859	1	0.1749	0.70934	0.99168	0.15938	0.6117	0.99628	-0.19658	-0.68404	0.99318	-0.02755	-0.16322	1	0.18309	0.60053	0.99664	0.16756	0.50805	0.99868	0.16902
ENST00000222308	0.21847	0.97025	0.99277	-0.32989	-0.54841	0.99807	0.09678	0.0231	1	-0.39829	-0.79612	0.98535	0.2396	0.11023	1	-0.12447	-0.07482	1	-0.02977	-0.34601	0.99986	0.42666	0.52549	0.99848	-0.06841	-0.25874	0.99998	0.56949	0.62326	0.99606	0.20542	0.45501	0.99933	0.30012	0.17589	1	-0.49507	-0.75329	0.98904	0.14283	0.08043	1	-0.22124	-0.09152	1	-0.12655	-0.34192	0.99987	0.63789
ENST00000222329	3.32838	0.00481	0.05876	0.50014	3.05558	0.03878	0.26647	1.61589	0.67216	0.49475	3.20409	0.02481	0.66053	3.78597	0.00353	0.24922	1.93342	0.45939	0.24384	1.72845	0.59731	-0.23367	-1.24448	0.87605	-0.00539	0.18293	1	0.16039	0.84993	0.97924	-0.25092	-1.04848	0.94214	-0.2563	-1.24705	0.87502	0.22828	1.40371	0.7996	0.39406	2.00827	0.41196	-0.01725	0.23022	0.99999	-0.02263	0.04256	1	0.16578
ENST00000222330	0.53713	0.77896	0.92317	0.17404	0.85822	0.97839	0.34067	1.49144	0.74998	0.2122	1.20631	0.89172	0.03183	0.40776	0.99964	0.20979	1.08649	0.93204	0.36509	1.0646	0.93813	0.16663	0.68662	0.99331	0.03816	0.35454	0.99984	-0.14221	-0.42251	0.99956	0.03575	0.25012	0.99998	0.19105	0.23665	0.99999	-0.12848	-0.34781	0.99986	-0.30884	-1.06665	0.93753	-0.13088	-0.43594	0.99948	0.02442	-0.44342	0.99942	-0.18036
ENST00000222345	3.98381	0.00126	0.02208	0.33959	3.32336	0.01663	0.29197	2.47384	0.17137	0.31986	2.63786	0.11722	0.33245	2.83399	0.07132	0.05938	0.79427	0.98549	0.02174	-0.02972	1	-0.04762	-0.61345	0.99638	-0.01973	-0.62164	0.9961	-0.00714	-0.36367	0.99982	-0.28021	-2.4016	0.20027	-0.31785	-3.22129	0.023	0.02789	0.02046	1	0.04048	0.25265	0.99998	-0.23259	-1.65085	0.6492	-0.27023	-2.41233	0.19571	0.01259
ENST00000222374	3.18218	0.00666	0.07396	0.13351	1.24851	0.87362	-0.15691	-1.12458	0.91964	0.14943	1.64599	0.65284	0.05699	0.23622	0.99999	-0.16522	-0.90519	0.97131	-0.25059	-1.9407	0.45656	-0.29042	-2.27052	0.26596	0.01593	0.40904	0.99962	-0.07652	-0.95845	0.96174	-0.29872	-2.09471	0.36136	-0.3841	-3.13119	0.03336	0.30635	2.62424	0.12693	0.2139	1.29869	0.85146	-0.0083	0.2471	0.99998	-0.09368	-0.71271	0.99168	-0.09245
ENST00000222390	1.51061	0.18182	0.51614	0.04101	0.58697	0.99677	-0.08236	0.46819	0.9991	0.12061	0.77422	0.98583	0.60172	1.68676	0.63074	1.11923	2.71174	0.1423	0.58514	1.62889	0.6657	-0.12337	-0.08595	1	0.0796	0.19633	0.99999	0.56071	1.12826	0.91272	1.07821	2.17337	0.34922	0.54413	1.07554	0.93004	0.20297	0.27044	0.99996	0.68408	1.15399	0.90447	1.20159	2.15053	0.35822	0.6675	1.10563	0.9213	0.48111
ENST00000222399	3.47341	0.00356	0.04734	0.36995	0.40667	0.99963	0.1661	0.43604	0.99945	0.38261	-0.01184	1	1.15884	0.59611	0.99663	1.79297	1.54215	0.71833	-1.93534	-2.56595	0.144	-0.20385	0.04878	1	0.01266	-0.39602	0.99968	0.78889	0.23207	0.99999	1.42302	1.17547	0.89939	-2.30529	-2.92369	0.06094	0.21651	-0.42598	0.99951	0.99274	0.17932	1	1.62687	1.0892	0.92814	-2.10144	-2.78921	0.08584	0.77624
ENST00000222402	1.32595	0.25217	0.59765	-0.40844	-1.98171	0.42684	-0.44637	-2.1152	0.34416	-0.38933	-1.98599	0.42408	-0.38844	-1.65231	0.64811	-0.20057	-0.8247	0.98244	-0.39806	-2.16885	0.31326	-0.03794	-0.25125	0.99998	0.0191	-0.03112	1	0.02	0.27435	0.99997	0.20787	1.08919	0.93139	0.01038	-0.24559	0.99998	0.05704	0.21849	0.99999	0.05794	0.50286	0.99882	0.24581	1.27047	0.86543	0.04832	0.01359	1	0.00089
ENST00000222482	8.99649	0	1e-05	-1.17376	-1.89639	0.53453	-1.34975	-2.28858	0.34952	-1.48619	-3.15196	0.12053	-0.2038	-0.26107	0.99994	-2.62554	-4.97661	0.00738	-3.37524	-6.89144	0.00055	-0.17599	-0.51812	0.99791	-0.31243	-1.25158	0.85936	0.96996	1.69826	0.63891	-1.45178	-3.02301	0.09647	-2.20148	-4.84266	0.0028	-0.13644	-0.65782	0.99272	1.14595	2.10429	0.43685	-1.27579	-2.29834	0.30219	-2.02549	-3.96835	0.01423	1.28238
ENST00000222511	2.66345	0.01837	0.14604	0.4151	2.1463	0.32895	0.19252	0.73938	0.98998	0.16032	1.15079	0.91153	-0.12279	-0.76836	0.98774	0.43187	1.77393	0.56684	0.49197	2.47905	0.17112	-0.22258	-1.25999	0.86932	-0.25478	-0.96838	0.96026	-0.53789	-2.81514	0.07666	0.01677	-0.2871	0.99995	0.07687	0.39201	0.99971	-0.0322	0.3398	0.99988	-0.31531	-1.42143	0.7899	0.23935	0.9471	0.96437	0.29945	1.59978	0.68262	-0.28311
ENST00000222543	11.9288	0	0	1.21065	6.36117	0	0.60113	3.17565	0.03427	1.26617	6.87472	0	0.93958	5.01172	0.0001	0.57169	3.10171	0.04116	0.26633	1.9043	0.48327	-0.60952	-2.77563	0.10071	0.05553	0.5552	0.99771	-0.27107	-1.17853	0.89839	-0.63895	-3.01981	0.05614	-0.94432	-4.24115	0.00155	0.66505	3.2767	0.02926	0.33846	1.59766	0.68432	-0.02943	-0.1637	1	-0.3348	-1.29724	0.85084	-0.32659
ENST00000222547	0.43877	0.85139	0.95124	-0.28717	-0.53683	0.99823	-0.22766	-0.2895	0.99995	-0.09814	0.21533	0.99999	0.16102	0.81931	0.98242	0.05071	0.6366	0.99544	-0.12584	-0.00433	1	0.05951	0.21358	0.99999	0.18903	0.74135	0.98964	0.44819	1.32796	0.83719	0.33788	1.14925	0.91122	0.16134	0.51573	0.99859	0.12952	0.48686	0.99898	0.38868	1.05003	0.94077	0.27837	0.87822	0.97517	0.10183	0.27756	0.99996	0.25916
ENST00000222553	2.72146	0.01704	0.13906	-0.37305	-3.18767	0.02455	-0.19568	-1.36147	0.82222	-0.30808	-2.42224	0.18977	-0.37867	-3.15677	0.02707	-0.29063	-2.21964	0.2853	-0.32156	-3.16719	0.02616	0.17736	1.60804	0.67719	0.06496	0.71965	0.99144	-0.00562	-0.06586	1	0.08242	0.86288	0.97788	0.05149	-0.08825	1	-0.1124	-0.91334	0.97054	-0.18299	-1.62349	0.6671	-0.09494	-0.75303	0.9891	-0.12588	-1.64327	0.65407	-0.07059
ENST00000222567	4.73583	0.00026	0.00657	-0.03968	-1.01858	0.94964	-0.26729	-4.12197	0.00086	-0.00523	-0.41688	0.99959	0.06122	0.42315	0.99956	-0.14144	-2.358	0.21897	-0.13263	-1.89492	0.48462	-0.2276	-3.12263	0.03111	0.03445	0.57945	0.99736	0.1009	1.38739	0.80843	-0.10175	-1.35016	0.82768	-0.09294	-0.88905	0.97413	0.26206	3.62837	0.00581	0.3285	4.33502	0.00036	0.12585	1.76069	0.57533	0.13466	2.21761	0.28772	0.06645
ENST00000222572	1.76974	0.11088	0.40409	0.21105	0.7546	0.98453	-0.76106	-1.9594	0.47524	4e-05	-0.49042	0.99848	-0.34689	-0.80987	0.97915	-0.47202	-1.27643	0.85161	0.38853	1.21836	0.87202	-0.97211	-2.69373	0.181	-0.21101	-1.23108	0.86599	-0.55794	-1.55361	0.71129	-0.68307	-2.01166	0.45725	0.17748	0.50468	0.99805	0.7611	1.45171	0.76666	0.41417	1.14781	0.90284	0.28904	0.667	0.99297	1.14959	3.05446	0.10308	-0.34693
ENST00000222574	0.97067	0.44882	0.75691	-0.08023	-0.03478	1	-0.3416	-1.12221	0.9213	-0.09541	-0.56367	0.99775	0.14658	0.87573	0.97605	-0.19371	-0.73386	0.99046	-0.26771	-1.13582	0.91693	-0.26137	-1.08357	0.93291	-0.01518	-0.5263	0.99847	0.22681	0.90435	0.97185	-0.11348	-0.69618	0.99281	-0.18748	-1.09606	0.9293	0.24619	0.56501	0.99772	0.48818	1.90507	0.47764	0.14788	0.39129	0.99972	0.07389	0.01832	1	0.24199
ENST00000222584	0.93389	0.47413	0.7732	-0.52963	-1.26948	0.86489	0.2088	0.17526	1	-0.44924	-1.01909	0.94903	-0.63518	-1.56342	0.7057	-0.2058	-0.87394	0.97595	0.04111	0.07868	1	0.73842	1.3343	0.83474	0.08039	0.23789	0.99998	-0.10556	-0.33661	0.99988	0.32382	0.33691	0.99988	0.57074	1.29289	0.85444	-0.65804	-1.10556	0.92558	-0.84398	-1.60252	0.68093	-0.4146	-0.97304	0.95905	-0.16768	-0.0965	1	-0.18595
ENST00000222597	0.55815	0.76281	0.91694	0.04173	0.4986	0.99821	0.63977	1.31885	0.82671	0.05671	0.25264	0.99996	0.11187	0.9024	0.96245	0.48777	1.33146	0.82126	0.77958	1.95511	0.5007	0.59803	0.84812	0.97059	0.01498	-0.23592	0.99998	0.07014	0.4098	0.99935	0.44604	0.8542	0.96973	0.73785	1.47853	0.75004	-0.58305	-1.05391	0.92518	-0.52789	-0.45177	0.99884	-0.152	-0.00779	1	0.13981	0.58446	0.99524	0.05516
ENST00000222644	1.34357	0.24429	0.58915	-0.52113	-1.22905	0.88246	0.25919	0.36898	0.9998	-0.4068	-1.19595	0.8954	0.41331	0.28345	0.99996	0.53934	0.40892	0.99963	0.71962	0.94649	0.96443	0.78032	1.48469	0.7538	0.11433	0.00284	1	0.93444	1.41637	0.79259	1.06047	1.53566	0.72303	1.24075	2.07352	0.37175	-0.66599	-1.44894	0.7745	0.15412	-0.08439	1	0.28016	0.03319	1	0.46043	0.53438	0.9983	0.82011
ENST00000222673	1.01904	0.41708	0.73565	0.13967	0.74985	0.98935	-0.02544	-0.28728	0.99995	0.16269	1.06584	0.93801	-0.09062	-0.98642	0.95706	0.01464	-0.27803	0.99996	0.12083	0.75931	0.98862	-0.1651	-0.98157	0.95807	0.02302	0.32163	0.99991	-0.23029	-1.69311	0.62073	-0.12503	-0.99127	0.95603	-0.01884	0.02893	1	0.18813	1.2731	0.86437	-0.06519	-0.64184	0.9954	0.04007	0.01642	1	0.14626	0.98656	0.95703	-0.25331
ENST00000222690	2.86748	0.01257	0.11382	-0.1377	-1.93429	0.45755	-0.10409	-1.39197	0.80637	-0.28842	-3.97318	0.00141	-0.11942	-1.98144	0.4267	-0.17833	-2.37382	0.20998	-0.17402	-2.52029	0.1522	0.03361	0.41891	0.99959	-0.15071	-2.04197	0.3882	0.01828	-0.10782	1	-0.04062	-0.4939	0.99894	-0.03632	-0.63388	0.9957	-0.18432	-2.32946	0.23009	-0.01533	-0.50841	0.99875	-0.07423	-0.87191	0.97669	-0.06993	-1.00512	0.95299	0.169
ENST00000222693	3.56633	0.00274	0.03908	1.13123	3.71018	0.00438	0.11855	1.02947	0.94715	0.45923	1.78212	0.56072	1.07408	3.40735	0.01277	0.50396	2.15593	0.32136	0.18801	1.07511	0.93528	-1.01268	-2.54033	0.14778	-0.67201	-1.91415	0.47221	-0.05715	-0.15909	1	-0.62727	-1.52023	0.73256	-0.94322	-2.60308	0.1276	0.34067	0.68202	0.99355	0.95553	2.29956	0.24685	0.38541	1.04895	0.94225	0.06946	0.00844	1	0.61485
ENST00000222725	4.424	0.0005	0.01093	-0.26416	-1.32558	0.83953	0.25649	0.89263	0.97341	0.22587	1.30021	0.85138	0.14113	0.50837	0.99872	0.45528	2.01405	0.40855	0.82359	3.41242	0.01356	0.52065	2.09859	0.3567	0.49003	2.57615	0.1378	0.4053	1.76521	0.57285	0.71945	3.25168	0.02194	1.08776	4.62606	0.00013	-0.03062	0.324	0.99991	-0.11536	-0.38801	0.99973	0.19879	1.01254	0.95073	0.5671	2.34389	0.22909	-0.08474
ENST00000222726	18.6413	0	0	0.3629	4.15609	0.00102	-0.23011	-2.57376	0.13971	0.43828	5.23983	1e-05	0.17424	2.2359	0.28262	-0.10926	-0.79472	0.98528	-0.21207	-2.83648	0.07309	-0.59301	-6.39939	0	0.07538	1.1206	0.92072	-0.18866	-1.76823	0.57174	-0.47216	-4.77699	8e-05	-0.57497	-6.77153	0	0.66839	7.36758	0	0.40435	4.54464	0.00021	0.12085	1.74241	0.58837	0.01804	-0.16922	1	-0.26404
ENST00000222728	2.17402	0.05003	0.26534	0.49511	1.99709	0.43845	-0.25336	-0.92304	0.96636	-0.03796	0.02969	1	-0.01332	0.03507	1	-0.37873	-1.59474	0.6863	0.07876	0.15404	1	-0.74847	-2.79085	0.11045	-0.53307	-1.93787	0.47372	-0.50843	-1.90736	0.49315	-0.87384	-3.49662	0.02169	-0.41636	-1.76556	0.58019	0.2154	0.93723	0.96378	0.24004	0.93104	0.96473	-0.12537	-0.60788	0.99621	0.33212	1.03361	0.94267	0.02464
ENST00000222747	2.36849	0.03488	0.21577	0.2911	1.61638	0.67223	0.18159	1.41358	0.79316	0.10339	1.04632	0.94161	0.59827	3.34287	0.02142	0.45117	2.43604	0.19648	0.3999	2.36468	0.22604	-0.1095	-0.10341	1	-0.18771	-0.54971	0.99794	0.30718	1.76013	0.57912	0.16007	0.87184	0.97569	0.1088	0.79594	0.98474	-0.07821	-0.41571	0.99958	0.41668	1.76765	0.57395	0.26957	0.92476	0.9675	0.2183	0.85347	0.97821	0.49488
ENST00000222800	0.47873	0.82283	0.94047	0.28941	0.93069	0.96689	-0.15729	-0.25353	0.99998	0.26295	0.89314	0.973	-0.01598	-0.1117	1	0.23101	0.61692	0.99618	-0.03185	-0.0685	1	-0.4467	-1.11859	0.92134	-0.02646	-0.02366	1	-0.30539	-0.99723	0.95362	-0.0584	-0.27684	0.99996	-0.32126	-0.96712	0.96013	0.42024	1.079	0.93318	0.14131	0.13796	1	0.38829	0.81833	0.98272	0.12544	0.18135	1	-0.27893
ENST00000222803	1.41657	0.21518	0.55767	-0.18786	-1.66611	0.63959	-0.15894	-1.15088	0.91094	0.03521	0.20706	0.99999	-0.09133	-0.84288	0.97987	0.0623	0.83479	0.98088	-0.04639	-0.16698	1	0.02893	0.41085	0.99962	0.22307	1.8233	0.53479	0.09654	0.75981	0.98825	0.25016	2.4178	0.19883	0.14148	1.43979	0.77932	0.19414	1.31555	0.84366	0.06761	0.3185	0.99991	0.22123	1.88654	0.49251	0.11255	0.95733	0.96217	-0.12654
ENST00000222812	0.86399	0.52358	0.8026	0.42588	1.10073	0.92164	0.26706	0.2927	0.99994	0.01761	0.49262	0.99876	-0.33035	-0.66026	0.99382	-0.12554	-0.34558	0.99984	0.39624	1.22019	0.88005	-0.15882	-0.73069	0.98904	-0.40826	-0.60003	0.99617	-0.75622	-1.72846	0.60486	-0.55142	-1.40023	0.79665	-0.02964	0.15025	1	-0.24944	0.1666	1	-0.5974	-0.89665	0.96998	-0.3926	-0.60221	0.99623	0.12918	0.85494	0.976	-0.34796
ENST00000222823	2.41071	0.03171	0.20398	2.20299	2.86444	0.0738	1.1284	2.15998	0.32349	1.76707	2.15549	0.32821	2.25473	2.87113	0.07392	1.50469	2.07439	0.37376	0.99681	1.2045	0.89169	-1.07459	-0.66214	0.99425	-0.43592	-0.65228	0.99464	0.05174	0.10162	1	-0.6983	-0.72542	0.99059	-1.20618	-1.58038	0.69503	0.63867	0.00715	1	1.12633	0.74578	0.9891	0.37629	-0.06667	1	-0.13159	-0.9126	0.96996	0.48766
ENST00000222969	0.70885	0.64317	0.86348	0.19215	0.97598	0.958	-0.21234	-0.10326	1	0.33684	1.0229	0.94749	0.16587	0.82554	0.98169	-0.19612	-0.14007	1	0.30854	1.297	0.85178	-0.40449	-1.02322	0.94751	0.14469	0.06324	1	-0.02628	-0.12086	1	-0.38827	-1.08462	0.93131	0.11639	0.35229	0.99984	0.54918	1.06723	0.93614	0.37821	0.88045	0.97467	0.01622	-0.03185	1	0.52088	1.329	0.83677	-0.17097
ENST00000222990	0.97894	0.44342	0.75285	-0.01901	-0.17375	1	0.07369	1.22113	0.88588	0.00497	0.32654	0.9999	0.08006	1.06172	0.93885	-0.03867	-0.29459	0.99995	0.1049	1.42469	0.78838	0.0927	1.37342	0.81587	0.02398	0.49206	0.99895	0.09907	1.21833	0.88695	-0.01966	-0.125	1	0.12391	1.58293	0.6934	-0.06872	-0.89175	0.97375	0.00637	-0.18566	1	-0.11236	-1.45225	0.77286	0.03121	0.14837	1	0.07509
ENST00000223023	4.33485	0.0006	0.01252	-0.30914	-3.97434	0.00145	-0.03922	-0.5042	0.9988	-0.13793	-1.82451	0.53162	-0.2822	-3.51383	0.00832	-0.08056	-0.97064	0.96021	-0.07152	-1.30742	0.84864	0.26992	3.18286	0.0251	0.17121	2.06986	0.3714	0.02694	0.33839	0.99988	0.22858	2.84418	0.06778	0.23762	2.5253	0.15103	-0.09872	-1.20192	0.89354	-0.24298	-2.78188	0.08022	-0.04135	-0.41916	0.99958	-0.03231	-0.73205	0.9906	-0.14426
ENST00000223026	1.14232	0.34347	0.68053	0.50662	1.39771	0.79957	0.48572	1.38425	0.80663	0.25353	0.7552	0.98788	0.49316	1.43821	0.77769	-0.01943	0.39265	0.99968	1.04625	2.33173	0.25863	-0.0209	0.07483	1	-0.25309	-0.62517	0.99551	-0.01346	0.075	1	-0.52605	-0.96066	0.95944	0.53963	1.00112	0.9499	-0.23219	-0.66135	0.99393	0.00744	-0.00256	1	-0.50515	-0.97584	0.95638	0.56053	0.87648	0.97355	0.23963
ENST00000223029	3.05301	0.00865	0.08828	-0.00475	-0.32737	0.9999	-0.18401	-1.94847	0.44829	0.06254	0.44075	0.99945	-0.01489	-0.21071	0.99999	-0.19834	-2.2166	0.28679	-0.24998	-2.71831	0.0941	-0.17926	-1.62209	0.66801	0.06729	0.75202	0.98917	-0.01014	0.10543	1	-0.19359	-1.87285	0.4987	-0.24523	-2.37174	0.21106	0.24655	2.30725	0.24082	0.16912	1.67734	0.63138	-0.01433	-0.18753	1	-0.06597	-0.64887	0.99511	-0.07743
ENST00000223054	0.76017	0.60261	0.84342	-0.73186	-1.23209	0.87312	-0.40578	-0.23351	0.99998	0.1464	0.67688	0.99201	-0.60598	-0.90923	0.96615	-0.10047	-0.35274	0.9998	0.08875	0.37813	0.99969	0.32608	0.92232	0.96471	0.87825	1.89156	0.51133	0.12587	0.28879	0.99994	0.63138	0.81581	0.98052	0.82061	1.55313	0.71134	0.55218	0.86899	0.9724	-0.2002	-0.62793	0.99496	0.30531	-0.11012	1	0.49453	0.58305	0.99656	-0.75238
ENST00000223061	1.90005	0.08781	0.35757	0.06447	0.64511	0.99524	0.12055	0.58688	0.99718	0.11821	0.87394	0.97632	0.36377	2.06025	0.37808	0.34721	1.97483	0.43178	0.5073	2.70411	0.09891	0.05608	-0.01441	1	0.05374	0.23596	0.99999	0.2993	1.43059	0.78507	0.28274	1.34448	0.83059	0.44283	2.07349	0.36991	-0.00234	0.23534	0.99999	0.24322	1.36073	0.82238	0.22666	1.27848	0.86171	0.38675	1.96673	0.43714	0.24555
ENST00000223073	7.65519	0	6e-05	0.26941	3.05859	0.03703	-0.04525	-0.25842	0.99998	0.23163	2.46889	0.17206	0.31438	3.12771	0.03014	-0.11248	-1.00281	0.95341	-0.16688	-1.6594	0.64341	-0.31466	-3.10918	0.03179	-0.03778	-0.53831	0.99826	0.04497	0.17902	1	-0.38189	-3.92938	0.00177	-0.43629	-4.59338	0.0001	0.27688	2.55475	0.14156	0.35963	3.17764	0.02581	-0.06723	-0.68478	0.99343	-0.12163	-1.29794	0.85301	0.08275
ENST00000223084	1.81861	0.10093	0.38528	0.13235	0.30284	0.99992	-0.78348	-1.31259	0.84055	0.33279	0.7312	0.98872	-0.94062	-1.63029	0.66488	-0.82782	-1.66087	0.64577	-0.89175	-1.49233	0.74699	-0.91583	-1.58749	0.691	0.20044	0.42994	0.99937	-1.07297	-1.91097	0.4923	-0.96017	-1.9369	0.47552	-1.02409	-1.77216	0.57685	1.11628	1.97205	0.45709	-0.15713	-0.25091	0.99998	-0.04434	-0.30353	0.99993	-0.10826	-0.13413	1	-1.27341
ENST00000223095	3.65055	0.00251	0.03665	0.76772	3.09472	0.03909	0.64218	2.39074	0.21243	0.70607	3.1935	0.02948	0.98542	4.2242	0.00108	0.64371	2.65093	0.12024	0.50477	2.23389	0.28511	-0.12555	-0.47771	0.99907	-0.06165	0.12925	1	0.2177	1.19987	0.89205	-0.12401	-0.34094	0.99987	-0.26295	-0.76062	0.98806	0.06389	0.59481	0.99682	0.34324	1.59828	0.68378	0.00154	0.14461	1	-0.1374	-0.24663	0.99998	0.27935
ENST00000223122	0.82125	0.55554	0.81948	-0.85025	-0.61709	0.99568	0.10139	0.24155	0.99998	0.7092	0.6957	0.99103	-1.06481	-0.82296	0.98049	-0.03882	-0.12766	1	-1.07455	-1.35577	0.82024	0.95163	0.81814	0.98085	1.55945	1.29836	0.84423	-0.21456	-0.21859	0.99999	0.81143	0.45616	0.9992	-0.2243	-0.77742	0.98589	0.60781	0.41968	0.99944	-1.16619	-1.00674	0.94802	-0.1402	-0.35078	0.99982	-1.17594	-1.49994	0.74255	-1.77401
ENST00000223127	2.06927	0.06318	0.30213	0.19082	2.25531	0.26851	0.23679	2.56229	0.14042	0.17012	2.14687	0.32715	0.26984	3.01646	0.04306	0.1986	2.25567	0.26818	0.21778	2.48884	0.1657	0.04596	0.45574	0.99932	-0.0207	-0.07593	1	0.07902	0.83597	0.98102	0.00778	0.07473	1	0.02695	0.30116	0.99994	-0.06666	-0.52077	0.99855	0.03306	0.34491	0.99986	-0.03819	-0.37235	0.99979	-0.01901	-0.16174	1	0.09972
ENST00000223129	1.17147	0.32733	0.66776	-0.19692	-2.04311	0.39425	-0.21156	-1.66937	0.63774	-0.1342	-1.57561	0.69802	-0.23107	-2.21517	0.29683	-0.14595	-1.11828	0.92127	-0.08662	-0.83056	0.98123	-0.01463	0.2405	0.99998	0.06272	0.4303	0.99949	-0.03415	-0.23027	0.99999	0.05097	0.85725	0.97799	0.1103	1.13536	0.91579	0.07736	0.16716	1	-0.01951	-0.44989	0.99935	0.0656	0.57088	0.9975	0.12494	0.83324	0.98093	-0.09687
ENST00000223136	0.57785	0.74722	0.91049	0.14082	0.92311	0.96897	0.01746	-0.29881	0.99994	0.10852	0.8187	0.98312	0.0846	0.59518	0.99697	0.1549	1.20974	0.89065	0.16691	1.03542	0.94586	-0.12335	-1.14913	0.91267	-0.0323	-0.09241	1	-0.05621	-0.29685	0.99994	0.01408	0.31039	0.99993	0.0261	0.13966	1	0.09105	1.04879	0.94249	0.06714	0.83972	0.98076	0.13744	1.41012	0.7966	0.14945	1.25048	0.87412	-0.02391
ENST00000223145	1.86591	0.09357	0.36977	0.87266	2.6876	0.11914	0.43956	1.50819	0.73902	0.10989	0.23358	0.99999	0.07693	0.43152	0.99947	0.14035	0.65044	0.99478	0.61736	1.89586	0.48988	-0.43309	-1.00757	0.95012	-0.76277	-2.39847	0.21785	-0.79572	-2.17285	0.32672	-0.73231	-1.94075	0.46235	-0.2553	-0.6952	0.99235	-0.32968	-1.26128	0.86681	-0.36263	-1.06168	0.93681	-0.29921	-0.84953	0.97856	0.17779	0.32092	0.9999	-0.03296
ENST00000223190	1.05904	0.3916	0.71813	-2.38519	-1.70141	0.62139	-2.60495	-1.55625	0.70963	-3.74534	-2.0725	0.39648	-3.40427	-2.2718	0.29404	-1.66003	-0.96824	0.9561	-3.17098	-2.16044	0.34805	-0.21976	0.09223	1	-1.36015	-0.33107	0.99989	-1.01908	-0.62279	0.9959	0.72515	0.68726	0.99276	-0.7858	-0.51381	0.9986	-1.14039	-0.41013	0.99962	-0.79932	-0.68274	0.99325	0.94491	0.57396	0.99731	-0.56604	-0.57963	0.99725	0.34107
ENST00000223208	1.48277	0.19124	0.52853	-0.17723	-0.39806	0.99966	-0.26991	-0.59993	0.99652	0.15744	0.79265	0.98445	0.54433	1.85794	0.52005	-0.23831	-0.39589	0.99967	-0.27004	-0.64556	0.99482	-0.09269	-0.22575	0.99999	0.33467	1.17954	0.89791	0.72156	2.23382	0.30401	-0.06108	-0.0117	1	-0.09281	-0.26035	0.99997	0.42735	1.33286	0.8328	0.81425	2.32942	0.2573	0.03161	0.20734	0.99999	-0.00012	-0.02631	1	0.38689
ENST00000223210	1.43627	0.208	0.54928	0.11089	1.71141	0.60876	0.05454	0.94701	0.96457	0.07947	1.14816	0.91264	0.14604	1.62382	0.66699	-0.01571	0.52632	0.99846	-0.1038	-0.63225	0.99573	-0.05634	-0.64775	0.99512	-0.03142	-0.53003	0.9984	0.03515	-0.02229	1	-0.1266	-1.12365	0.92068	-0.21469	-2.28415	0.25389	0.02493	0.13929	1	0.0915	0.60499	0.99664	-0.07025	-0.42534	0.99954	-0.15834	-1.50907	0.73937	0.06657
ENST00000223215	1.97527	0.0754	0.33211	-0.48837	-1.95502	0.44715	-0.24429	-0.81763	0.98288	-0.17855	-0.19673	0.99999	0.2009	0.98137	0.95717	-0.20243	-0.3839	0.99974	0.13436	0.89069	0.9735	0.24409	1.00614	0.95208	0.30983	1.72409	0.60088	0.68927	2.82247	0.07847	0.28594	1.50324	0.74264	0.62274	2.75426	0.09156	0.06574	0.62125	0.99605	0.44518	1.70253	0.61559	0.04185	0.43263	0.99949	0.37865	1.62465	0.66665	0.37944
ENST00000223271	7.39651	0	8e-05	1.18526	3.30636	0.02507	0.35468	1.34949	0.8264	1.50805	4.14907	0.00215	2.05685	5.01541	0.00023	1.67983	4.28142	0.00142	1.81944	4.53199	0.00068	-0.83057	-1.79174	0.55878	0.32279	0.89602	0.97119	0.87159	1.87545	0.50989	0.49457	1.13868	0.91227	0.63419	1.41222	0.79213	1.15337	2.62397	0.1394	1.70217	3.51753	0.01753	1.32515	2.80814	0.09267	1.46476	3.06917	0.05045	0.5488
ENST00000223273	5.02101	0.00015	0.00417	-0.16852	-1.7077	0.61277	-0.59314	-4.97794	5e-05	-0.04143	-0.72915	0.9904	-0.19754	-1.83356	0.52958	-0.22288	-2.06308	0.38273	-0.32893	-2.85665	0.07415	-0.42463	-3.32281	0.02025	0.12709	0.9385	0.96515	-0.02903	-0.17389	1	-0.05436	-0.40247	0.99966	-0.16042	-1.18143	0.89962	0.55172	4.15677	0.00128	0.3956	3.06075	0.04349	0.37027	2.84026	0.07611	0.26421	2.12009	0.34778	-0.15612
ENST00000223293	3.37892	0.0044	0.05515	0.53047	3.91442	0.00351	0.32268	2.23481	0.28846	0.3704	2.89131	0.06972	0.43966	3.08702	0.04287	0.39762	3.24416	0.02682	0.2519	1.87132	0.50425	-0.20779	-1.41246	0.79333	-0.16007	-0.98386	0.95586	-0.09081	-0.71098	0.99145	-0.13286	-0.54254	0.99807	-0.27857	-1.91207	0.47893	0.04772	0.476	0.99908	0.11698	0.70829	0.99167	0.07494	0.86245	0.97698	-0.07078	-0.42083	0.99955	0.06926
ENST00000223321	0.4783	0.8234	0.94072	0.10574	0.11392	1	-0.17118	-1.07201	0.93625	0.14833	0.326	0.9999	-0.00871	-0.13139	1	0.03515	0.12715	1	-0.06933	-0.69835	0.99271	-0.27692	-1.16035	0.90875	0.04259	0.21012	0.99999	-0.11445	-0.23844	0.99998	-0.07059	0.01563	1	-0.17507	-0.79576	0.98542	0.31951	1.34448	0.83076	0.16247	0.90874	0.97125	0.20633	1.1507	0.91208	0.10185	0.38347	0.99975	-0.15704
ENST00000223324	2.78311	0.01501	0.12816	0.11533	0.97365	0.95948	-0.09666	-1.4442	0.77744	0.22574	1.88588	0.49065	0.08862	0.45973	0.99929	0.13504	1.02238	0.94881	-0.07202	-1.27459	0.86344	-0.21199	-2.32523	0.23381	0.11041	0.91368	0.97033	-0.02671	-0.47293	0.99916	0.01971	0.08012	1	-0.18735	-2.19164	0.30161	0.3224	3.14365	0.02909	0.18528	1.80676	0.54407	0.2317	2.32776	0.23251	0.02464	0.20867	0.99999	-0.13713
ENST00000223336	1.25908	0.28141	0.62607	0.00512	-0.00389	1	-0.34552	-1.11657	0.92017	0.33265	1.05138	0.93857	-0.12395	-0.52351	0.99836	0.33004	0.89498	0.97151	0.41795	1.00658	0.94988	-0.35064	-1.10503	0.92366	0.32753	1.04759	0.93947	-0.12907	-0.51587	0.99849	0.32492	0.89252	0.97184	0.41283	1.00336	0.95054	0.67817	2.08231	0.37955	0.22157	0.59189	0.99678	0.67556	1.90934	0.48404	0.76348	2.01843	0.41677	-0.45661
ENST00000223357	5.2168	8e-05	0.00264	-0.07688	-0.12459	1	1.16053	2.8153	0.07409	0.20898	1.2631	0.86858	0.67906	2.04708	0.38583	1.42172	3.96413	0.0016	1.09881	3.22979	0.02194	1.23741	2.90896	0.0574	0.28586	1.37674	0.81427	0.75594	2.15134	0.32374	1.49859	4.05481	0.00111	1.17568	3.32619	0.01606	-0.95155	-1.67584	0.63253	-0.48146	-0.87466	0.97618	0.26119	0.98183	0.95777	-0.06172	0.23737	0.99999	0.47009
ENST00000223361	1.54369	0.16965	0.49932	0.89753	1.00963	0.95034	1.21846	1.61755	0.67164	0.95342	0.89042	0.97294	-0.52326	-1.20538	0.89089	0.38605	0.51595	0.99857	0.39363	0.47635	0.99909	0.32093	0.66543	0.99395	0.05588	-0.08678	1	-1.42079	-2.12207	0.3498	-0.51148	-0.46277	0.99922	-0.5039	-0.49741	0.99882	-0.26504	-0.73215	0.98991	-1.74172	-2.62302	0.13488	-0.83241	-1.08907	0.92915	-0.82483	-1.12098	0.91933	-1.47668
ENST00000223368	0.53053	0.78419	0.92552	-0.13058	-0.684	0.99341	0.08801	0.00891	1	0.20919	0.99546	0.9547	-0.0401	0.00423	1	0.09669	0.52607	0.99846	-0.04581	-0.08507	1	0.2186	0.63593	0.99557	0.33978	1.64458	0.65345	0.09049	0.65723	0.99469	0.22728	1.17394	0.9035	0.08477	0.57687	0.99742	0.12118	0.91069	0.97066	-0.12811	-0.00467	1	0.00868	0.47738	0.99911	-0.13383	-0.08705	1	-0.24929
ENST00000223369	1.79461	0.10571	0.39414	0.06225	0.42401	0.99955	0.20853	1.04338	0.94356	-0.18428	-0.48141	0.99907	-0.20563	-1.32377	0.84062	-0.14002	-0.61793	0.99624	0.26218	1.47488	0.7597	0.14628	0.64234	0.99533	-0.24654	-0.89448	0.97331	-0.26789	-1.71773	0.60452	-0.20227	-1.02193	0.94886	0.19993	1.05307	0.94106	-0.39282	-1.47514	0.75954	-0.41416	-2.23244	0.28049	-0.34855	-1.58568	0.69164	0.05365	0.36227	0.99982	-0.02135
ENST00000223398	0.5179	0.79354	0.92945	-0.31053	-0.41625	0.99958	0.30189	0.07325	1	-0.301	-0.45551	0.9993	0.32727	0.59645	0.99675	-0.16675	-0.76268	0.98796	0.10425	0.62862	0.99571	0.61242	0.44593	0.99937	0.00953	-0.04694	1	0.6378	0.98299	0.95627	0.14378	-0.36331	0.99981	0.41478	1.02597	0.94688	-0.60289	-0.48074	0.99904	0.02538	0.47372	0.9991	-0.46864	-0.75667	0.98837	-0.19764	0.5009	0.99878	0.62827
ENST00000223428	0.34397	0.91203	0.97284	-0.2971	0.43225	0.99912	0.37657	0.63642	0.99252	-0.35005	-0.53264	0.9973	0.15348	0.41782	0.99923	-0.0133	-0.34876	0.99974	-0.44837	-0.86879	0.96832	0.67367	0.22167	0.99998	-0.05295	-0.94917	0.95263	0.45057	-0.01802	1	0.2838	-0.75347	0.98361	-0.15127	-1.2671	0.85026	-0.72662	-1.12282	0.90239	-0.2231	-0.23993	0.99997	-0.38987	-0.92566	0.9559	-0.82494	-1.43337	0.77236	0.50352
ENST00000223459	0.84587	0.53743	0.8099	0.01218	0.33631	0.99988	0.20291	1.50802	0.74	0.07719	0.99121	0.9558	0.16942	1.1758	0.90297	0.22505	1.62449	0.66653	0.23008	1.53849	0.72137	0.19072	1.18803	0.89851	0.06501	0.65253	0.99492	0.15724	0.84567	0.9799	0.21287	1.29034	0.85627	0.2179	1.20689	0.89139	-0.12572	-0.56519	0.9977	-0.03348	-0.35827	0.99983	0.02214	0.05708	1	0.02718	-0.02401	1	0.09223
ENST00000223500	1.33071	0.25027	0.59571	-0.16965	-2.20601	0.29359	-0.11173	-1.55144	0.71333	-0.17563	-2.37065	0.21278	-0.0943	-1.3341	0.8357	-0.14956	-1.60177	0.68128	-0.14513	-2.19208	0.30107	0.05792	0.50313	0.99881	-0.00598	-0.19259	1	0.07534	0.78732	0.98615	0.02008	0.53157	0.99838	0.02451	-0.05928	1	-0.0639	-0.67559	0.99388	0.01743	0.25124	0.99998	-0.03783	0.00918	1	-0.0334	-0.54447	0.99815	0.08133
ENST00000223528	0.71543	0.63786	0.86041	-0.57016	-0.85069	0.9781	-0.05941	-0.00296	1	0.34072	0.14152	1	-0.88027	-1.3898	0.8049	-0.17079	0.08197	1	-0.41132	0.09869	1	0.51074	0.78411	0.98552	0.91087	0.95708	0.96052	-0.31012	-0.55742	0.99775	0.39937	0.90584	0.97019	0.15884	0.95223	0.96222	0.40013	0.13509	1	-0.82086	-1.28254	0.85689	-0.11138	0.07932	1	-0.35191	0.09474	1	-1.22099
ENST00000223641	3.27272	0.00547	0.0643	0.30203	2.42906	0.18975	0.08655	0.88209	0.97508	0.38245	2.91206	0.05828	0.43873	3.47626	0.01043	0.3685	3.18842	0.0259	0.22528	1.91428	0.4721	-0.21548	-1.38574	0.80922	0.08041	0.5213	0.99853	0.1367	1.13165	0.91782	0.06647	0.82324	0.98244	-0.07675	-0.43852	0.99945	0.29589	1.85275	0.51347	0.35218	2.41062	0.19801	0.28195	2.12684	0.33928	0.13873	0.93756	0.96621	0.05629
ENST00000223642	0.74378	0.61546	0.84989	0.09637	0.60667	0.99614	0.26878	1.02273	0.94483	0.44994	1.46685	0.76125	-0.00936	0.25376	0.99997	0.3924	1.35026	0.82301	-0.18494	-0.09106	1	0.17242	0.45633	0.99921	0.35357	0.87507	0.97343	-0.10573	-0.33794	0.99986	0.29604	0.76939	0.98626	-0.28131	-0.68107	0.99288	0.18115	0.37449	0.99974	-0.27815	-0.76299	0.98681	0.12362	0.28359	0.99995	-0.45372	-1.08452	0.92846	-0.4593
ENST00000223836	0.66342	0.67929	0.88092	-0.39161	-0.99659	0.946	-0.14545	-1.16702	0.89428	-0.59057	-0.83777	0.97636	-0.61655	-0.96195	0.95426	0.23161	0.62317	0.99449	0.21419	0.0031	1	0.24616	-0.24289	0.99998	-0.19896	0.15633	1	-0.22494	0.02469	1	0.62322	1.57071	0.70158	0.6058	0.94766	0.95673	-0.44512	0.38691	0.99964	-0.4711	0.26352	0.99996	0.37706	1.69457	0.63128	0.35964	1.12025	0.91017	-0.02598
ENST00000223864	0.65902	0.6828	0.88238	0.02837	0.15707	1	-0.00914	-0.30677	0.99993	0.12056	1.05859	0.93971	0.04786	0.38608	0.99974	0.0418	0.11462	1	-0.03125	-0.87317	0.97642	-0.03751	-0.44896	0.99938	0.09219	0.89149	0.97379	0.01948	0.2318	0.99999	0.01343	-0.03657	1	-0.05962	-1.01576	0.95038	0.1297	1.27662	0.8625	0.05699	0.65237	0.99493	0.05094	0.40027	0.99968	-0.02211	-0.51539	0.99864	-0.0727
ENST00000224073	2.47909	0.02787	0.18928	0.08153	1.12279	0.92129	-0.1246	-1.6697	0.63647	0.18388	2.17413	0.3099	0.05531	0.59102	0.99708	0.03426	0.36005	0.99983	0.05162	0.64797	0.99515	-0.20614	-2.69682	0.09928	0.10234	1.0562	0.94056	-0.02622	-0.48922	0.99899	-0.04727	-0.71741	0.99159	-0.02992	-0.4348	0.99949	0.30848	3.64497	0.00505	0.17991	2.1544	0.32103	0.15886	1.93721	0.45561	0.17622	2.21379	0.28815	-0.12857
ENST00000224140	2.19414	0.04939	0.26356	-0.4066	-3.06538	0.03634	-0.06614	-0.84395	0.98018	-0.21608	-1.70866	0.61045	-0.30109	-2.29008	0.25019	-0.37654	-2.70511	0.09823	-0.28829	-1.76006	0.57558	0.34046	1.98748	0.42346	0.19052	1.29554	0.85407	0.10551	0.66701	0.9943	0.03006	0.25561	0.99998	0.11831	1.22735	0.88352	-0.14994	-0.75236	0.98911	-0.23495	-1.30667	0.84887	-0.3104	-1.68912	0.62358	-0.22214	-0.80871	0.9841	-0.08501
ENST00000224237	1.74936	0.11687	0.41527	0.01799	0.35164	0.99985	0.16873	1.20476	0.89259	0.05461	0.50717	0.99877	0.42335	2.05048	0.38284	0.3273	1.80102	0.54737	0.50028	2.41977	0.19032	0.15073	0.87036	0.97691	0.03661	0.15819	1	0.40536	1.70298	0.61408	0.3093	1.45405	0.77202	0.48229	2.07258	0.36923	-0.11412	-0.71224	0.99191	0.25462	0.77151	0.98762	0.15857	0.53205	0.99838	0.33155	1.12095	0.92189	0.36875
ENST00000224652	2.37803	0.03361	0.21129	-0.21338	0.20556	0.99999	-0.37047	0.0437	1	0.64568	0.3131	0.99991	0.65553	0.67718	0.99304	0.91352	1.13132	0.91363	-2.11752	-2.15628	0.33194	-0.15709	-0.15439	1	0.85906	0.11844	1	0.8689	0.48759	0.99886	1.1269	0.94955	0.96113	-1.90415	-2.38906	0.21792	1.01615	0.26139	0.99997	1.02599	0.61493	0.99592	1.28399	1.05759	0.93636	-1.74705	-2.10658	0.35862	0.00984
ENST00000224721	1.44527	0.2045	0.54492	0.29264	1.71621	0.60601	0.13956	0.80571	0.98421	0.26495	1.68425	0.62734	-0.02513	-0.60507	0.99661	-0.01931	0.05809	1	0.10285	0.67676	0.99375	-0.15308	-0.7932	0.98541	-0.0277	-0.0101	1	-0.31777	-2.23359	0.28278	-0.31195	-1.59184	0.68772	-0.1898	-0.98984	0.95577	0.12539	0.77405	0.98716	-0.16469	-1.33212	0.83608	-0.15886	-0.72293	0.99108	-0.03671	-0.15277	1	-0.29008
ENST00000224756	2.17127	0.05031	0.26612	-1.99782	-2.19139	0.30175	2.0657	1.6309	0.66274	-0.35138	-0.67766	0.99375	-1.01532	-0.71834	0.99146	-0.13833	-0.58422	0.99724	-0.58005	-0.93562	0.96663	4.06352	3.23184	0.02609	1.64645	1.43474	0.7828	0.9825	1.49225	0.74955	1.85949	1.44223	0.77856	1.41777	1.13912	0.91584	-2.41707	-2.12969	0.3423	-3.08102	-2.18091	0.31368	-2.20403	-2.03608	0.39761	-2.64575	-2.31731	0.24423	-0.66395
ENST00000224784	4.99384	0.00016	0.00435	0.64786	3.41812	0.01136	0.51663	2.70795	0.09644	0.83892	4.14803	0.00068	1.01501	4.38493	0.00024	0.83037	3.87275	0.0021	0.68182	3.31077	0.01632	-0.13123	-0.49756	0.99889	0.19106	0.78125	0.98677	0.36715	1.13614	0.91698	0.18251	0.59789	0.99689	0.03396	0.0109	1	0.32229	1.23073	0.8823	0.49838	1.55757	0.70952	0.31374	1.04729	0.94287	0.16519	0.49418	0.99893	0.17609
ENST00000224807	0.95786	0.45731	0.76258	0.68923	0.96142	0.95983	0.04292	0.18875	1	-0.64632	-0.39656	0.99968	1.30596	1.51977	0.73128	0.79137	1.08722	0.92888	-0.01949	-0.18534	1	-0.64631	-0.71262	0.99118	-1.33554	-1.34432	0.82781	0.61673	0.6069	0.99607	0.10215	0.16795	1	-0.70871	-1.10371	0.92413	-0.68923	-0.55436	0.99781	1.26304	1.25764	0.86587	0.74846	0.84386	0.97883	-0.0624	-0.35413	0.99983	1.95227
ENST00000224862	2.00991	0.07029	0.32021	0.69734	1.56462	0.70486	0.24384	0.39666	0.99968	-0.01288	-0.36714	0.9998	0.42754	0.879	0.97477	-0.23493	-0.96043	0.96141	-0.32029	-1.44068	0.77866	-0.4535	-1.05793	0.93825	-0.71022	-1.87278	0.5041	-0.2698	-0.63478	0.99539	-0.93227	-2.44264	0.19318	-1.01763	-2.90291	0.06674	-0.25671	-0.72204	0.99092	0.1837	0.43356	0.99946	-0.47876	-1.26342	0.86693	-0.56413	-1.70196	0.61623	0.44042
ENST00000224949	1.44264	0.20513	0.54561	0.21854	1.03336	0.94624	0.20841	0.95206	0.96376	0.53951	1.94925	0.4483	-0.12785	-0.23804	0.99998	-0.13054	-0.42313	0.99956	-0.07021	-0.1619	1	-0.01013	-0.01566	1	0.32097	0.93639	0.96656	-0.34639	-1.23315	0.88114	-0.34908	-1.41327	0.79475	-0.28875	-1.15904	0.90914	0.3311	0.90035	0.97249	-0.33626	-1.14398	0.91424	-0.33895	-1.31275	0.84608	-0.27862	-1.07457	0.93548	-0.66736
ENST00000224950	3.48139	0.00357	0.04738	-0.07306	-0.3993	0.99968	-0.34208	-2.51867	0.15514	-0.24302	-2.11009	0.3486	0.09111	1.02188	0.94875	-0.23506	-1.71737	0.60474	-0.263	-2.2946	0.24887	-0.26902	-2.12327	0.34082	-0.16995	-1.69533	0.6196	0.16418	1.39267	0.80555	-0.16199	-1.3151	0.84474	-0.18994	-1.89119	0.48727	0.09907	0.48923	0.99898	0.4332	3.37093	0.01445	0.10703	0.82512	0.98231	0.07908	0.28032	0.99996	0.33413
ENST00000225171	3.60057	0.00279	0.03951	-0.58671	-2.86119	0.0745	-0.7747	-3.99457	0.00234	-0.28604	-1.14857	0.91085	-0.62116	-3.17748	0.03236	-0.60894	-2.87822	0.0707	-0.5203	-2.49789	0.17179	-0.18799	-1.31533	0.8435	0.30067	1.66646	0.63976	-0.03445	-0.40064	0.99966	-0.02222	-0.10832	1	0.06642	0.2731	0.99996	0.48866	2.85434	0.07446	0.15354	0.90134	0.97165	0.16576	1.17064	0.9038	0.2544	1.53179	0.72518	-0.33512
ENST00000225174	13.4302	0	0	0.60063	4.63699	8e-05	-0.0497	-0.35274	0.99985	0.70852	5.58449	0	0.32279	2.36318	0.21492	0.12578	0.67255	0.99406	-0.12231	-1.67246	0.63463	-0.65034	-4.67068	7e-05	0.10788	1.02913	0.94734	-0.27784	-2.10247	0.35155	-0.47485	-3.77834	0.00308	-0.72294	-6.09839	0	0.75822	5.5553	0	0.3725	2.54131	0.14522	0.17548	0.96301	0.96176	-0.07261	-1.21604	0.88816	-0.38572
ENST00000225235	1.01731	0.41804	0.73612	-0.02209	-0.23368	0.99999	0.08671	0.49673	0.99888	-0.14417	-1.36549	0.81951	0.08478	0.61264	0.99636	0.09421	0.79599	0.98517	0.02675	0.13712	1	0.10879	0.70819	0.99199	-0.12208	-1.12208	0.92077	0.10686	0.8293	0.98161	0.1163	1.0115	0.95095	0.04884	0.36106	0.99982	-0.23087	-1.7502	0.58314	-0.00193	0.09357	1	0.0075	0.26263	0.99997	-0.05996	-0.35409	0.99984	0.22894
ENST00000225275	3.0276	0.00906	0.09104	0.26445	0.98833	0.95348	-0.27557	-1.15091	0.90821	0.24881	0.72225	0.99033	0.79012	2.10039	0.37892	-0.32389	-1.37043	0.8143	0.70984	1.59548	0.68593	-0.54002	-2.06501	0.39233	-0.01564	-0.24679	0.99998	0.52567	1.15076	0.90607	-0.58834	-2.30518	0.266	0.44539	0.6618	0.99381	0.52437	1.7965	0.5581	1.06568	3.06351	0.06088	-0.04832	-0.1712	1	0.9854	2.58571	0.16062	0.54131
ENST00000225276	3.76533	0.00199	0.03101	-0.1535	-0.35036	0.99985	-0.20171	-1.13719	0.91617	0.22794	1.86381	0.50619	0.00764	0.67252	0.99398	-0.14679	-1.17973	0.90145	-0.36431	-2.51777	0.15587	-0.04821	-0.81111	0.98375	0.38144	2.18677	0.30611	0.16114	1.00297	0.95303	0.00671	-0.84119	0.9804	-0.21082	-2.18014	0.30878	0.42965	2.83096	0.07297	0.20935	1.71625	0.60573	0.05492	-0.00811	1	-0.16261	-1.24184	0.87728	-0.2203
ENST00000225296	1.89718	0.08807	0.35809	0.07515	0.48685	0.99901	-0.07157	-0.79013	0.98584	0.08146	0.57829	0.99738	0.04608	0.2606	0.99997	-0.19816	-1.89458	0.48504	-0.14543	-1.49789	0.74607	-0.14673	-1.23188	0.88135	0.00631	0.09676	1	-0.02908	-0.20736	0.99999	-0.27332	-2.33322	0.23089	-0.22058	-1.94758	0.45014	0.15304	1.30618	0.84884	0.11765	0.99968	0.95384	-0.12659	-0.99645	0.95463	-0.07386	-0.62862	0.99586	-0.03539
ENST00000225298	1.72211	0.12315	0.42678	-0.15364	-2.19755	0.29905	-0.1479	-1.93463	0.45854	-0.16636	-2.70695	0.09908	-0.05976	-0.71976	0.99135	-0.12697	-1.89205	0.4867	-0.11676	-1.81201	0.54062	0.00574	0.11802	1	-0.01272	-0.5417	0.99819	0.09388	1.38681	0.80872	0.02667	0.22827	0.99999	0.03688	0.31201	0.99993	-0.01845	-0.62319	0.99605	0.08814	1.18883	0.89815	0.02093	0.09988	1	0.03114	0.17784	1	0.1066
ENST00000225308	1.16364	0.33163	0.67096	0.36926	0.75386	0.98868	0.79486	1.52244	0.73073	0.23251	0.90263	0.97152	-0.07544	-0.02071	1	-0.33544	-0.37058	0.99979	-0.39248	-0.75517	0.98869	0.4256	0.82155	0.98209	-0.13674	0.15075	1	-0.4447	-0.74946	0.989	-0.7047	-1.09882	0.92748	-0.76174	-1.46809	0.7631	-0.56235	-0.67762	0.99351	-0.8703	-1.50235	0.74274	-1.1303	-1.82406	0.53503	-1.18734	-2.15967	0.32637	-0.30795
ENST00000225328	0.64717	0.69225	0.88629	-0.43245	-0.82826	0.98014	-0.61658	-0.99982	0.95075	-0.63453	-1.07115	0.93237	-0.50932	-1.11618	0.91854	-0.78119	-1.47161	0.75932	0.15543	0.12711	1	-0.18413	-0.21631	0.99999	-0.20208	-0.2496	0.99998	-0.07687	-0.30763	0.99992	-0.34875	-0.66381	0.9939	0.58788	0.91695	0.96717	-0.01795	-0.02122	1	0.10726	-0.07964	1	-0.16462	-0.41601	0.99956	0.77201	1.07972	0.92998	0.12521
ENST00000225388	1.64692	0.14154	0.45644	-0.20121	-2.54825	0.14345	-0.06631	-0.91218	0.97068	-0.0272	-0.5734	0.99753	-0.14982	-2.16741	0.31436	-0.14369	-1.75588	0.57835	-0.11065	-1.71839	0.60379	0.13489	1.45829	0.76948	0.17401	1.91382	0.47151	0.05138	0.29318	0.99995	0.05752	0.70222	0.99248	0.09056	0.74813	0.98945	0.03911	0.35869	0.99983	-0.08351	-1.1396	0.91572	-0.07738	-0.75602	0.98885	-0.04433	-0.71952	0.99143	-0.12262
ENST00000225394	1.54048	0.17065	0.5005	0.8498	2.55549	0.14209	0.62779	1.60875	0.67676	0.31424	1.1352	0.91711	0.32967	1.1069	0.926	0.30928	0.81565	0.98338	0.00837	0.05905	1	-0.22201	-0.77768	0.98699	-0.53556	-1.40501	0.7991	-0.52014	-1.3752	0.81488	-0.54052	-1.65739	0.64485	-0.84143	-2.42322	0.19074	-0.31355	-0.54585	0.99812	-0.29812	-0.53486	0.99832	-0.31851	-0.80153	0.9848	-0.61942	-1.51166	0.73784	0.01543
ENST00000225430	0.85062	0.53391	0.808	0.08594	0.54169	0.99821	-0.04058	-0.41105	0.99963	0.07422	0.2379	0.99999	-0.00223	-0.15542	1	0.31347	1.62519	0.66596	0.18092	0.77556	0.98728	-0.12652	-0.90982	0.97114	-0.01172	-0.29158	0.99995	-0.08817	-0.67281	0.99405	0.22752	1.09406	0.93006	0.09498	0.25257	0.99998	0.1148	0.62143	0.99615	0.03835	0.25124	0.99998	0.35405	1.90906	0.47425	0.2215	1.11805	0.9228	-0.07645
ENST00000225474	2.04755	0.06564	0.30834	0.14037	1.44915	0.76538	-0.19905	0.69071	0.99017	0.08665	1.05406	0.92642	1.32377	4.85155	0.02631	-0.01841	0.65087	0.99255	-0.34348	0.33752	0.99981	-0.33942	-0.65326	0.99253	-0.05372	-0.37322	0.99963	1.1834	3.29518	0.13151	-0.15878	-0.7225	0.98714	-0.48385	-1.03455	0.93337	0.28571	0.2982	0.99991	1.52282	3.6713	0.07618	0.18064	-0.05092	1	-0.14443	-0.3451	0.99979	1.23712
ENST00000225519	0.62127	0.71295	0.89529	-0.38211	-0.00672	1	1.06485	1.37137	0.81474	0.38736	0.63123	0.99558	0.71444	0.99029	0.95444	0.25059	0.84435	0.97943	0.02985	-0.0515	1	1.44697	1.39649	0.80176	0.76948	0.64885	0.99488	1.09655	1.01241	0.94952	0.6327	0.86481	0.97683	0.41197	-0.04605	1	-0.67749	-0.77521	0.98648	-0.35042	-0.41274	0.99958	-0.81426	-0.56086	0.99765	-1.035	-1.36645	0.81728	0.32707
ENST00000225573	0.46881	0.83016	0.94325	-0.52744	-0.856	0.97263	-1.22419	-1.19418	0.88553	-1.03505	-1.50459	0.73816	-1.08852	-1.5499	0.71313	-1.61632	-1.50664	0.73748	-1.5629	-1.19417	0.88651	-0.69675	-0.37169	0.99972	-0.50761	-0.64796	0.99367	-0.56108	-0.69824	0.99055	-1.08888	-0.63942	0.99436	-1.03546	-0.32824	0.99987	0.18914	-0.25121	0.99997	0.13567	-0.3017	0.99992	-0.39213	-0.23775	0.99998	-0.33871	0.06172	1	-0.05347
ENST00000225576	0.21072	0.97284	0.99331	-0.16037	-0.33824	0.99986	-0.36568	-0.53359	0.99812	-0.35905	-0.71997	0.99037	0.26581	0.14029	1	-0.43585	-0.66588	0.9937	-0.08307	-0.06438	1	-0.2053	-0.2126	0.99999	-0.19868	-0.3841	0.99971	0.42618	0.46331	0.99912	-0.27548	-0.33462	0.99987	0.07731	0.26234	0.99997	0.00663	-0.15332	1	0.63148	0.64517	0.99454	-0.07018	-0.10937	1	0.28261	0.45617	0.99923	0.62486
ENST00000225577	1.21787	0.30176	0.64606	-2.11793	-1.92811	0.46336	-0.5746	-0.49735	0.99887	-1.39466	-1.31842	0.84292	-1.38539	-1.28342	0.85909	-0.2112	0.03257	1	-0.40192	-0.26327	0.99997	1.54333	1.33111	0.83702	0.72327	0.60626	0.99662	0.73254	0.60907	0.99653	1.90672	1.90897	0.47579	1.71601	1.61924	0.66998	-0.82006	-0.76091	0.98838	-0.81079	-0.73505	0.99032	0.3634	0.51867	0.99857	0.17268	0.23557	0.99999	0.00927
ENST00000225603	1.0665	0.38645	0.71397	-0.14562	-1.55861	0.70886	-0.0556	-0.59175	0.99706	-0.11979	-1.14509	0.91397	-0.12585	-1.47763	0.75825	0.0426	0.32076	0.99991	-0.1209	-1.3312	0.83732	0.09003	0.86463	0.97764	0.02583	0.38916	0.99973	0.01977	0.03282	1	0.18822	1.80928	0.5419	0.02472	0.18743	1	-0.06419	-0.48845	0.999	-0.07025	-0.81035	0.98397	0.0982	0.86969	0.97696	-0.0653	-0.66951	0.9942	-0.00606
ENST00000225609	1.45254	0.20175	0.54109	-0.55596	-1.3282	0.82904	-0.70339	-1.86471	0.52705	0.22254	0.32036	0.99987	-0.34823	-0.68446	0.99139	-0.3956	-0.94928	0.95789	-0.71315	-2.2942	0.29987	-0.14744	-0.62043	0.99531	0.7785	1.62182	0.67241	0.20773	0.61322	0.99537	0.16036	0.32436	0.99988	-0.15719	-1.02127	0.9434	0.92594	2.13051	0.3855	0.35516	1.18105	0.89216	0.30779	0.89954	0.96854	-0.00976	-0.36044	0.99979	-0.57077
ENST00000225614	0.52174	0.79074	0.92829	-0.75415	-0.477	0.99899	0.36914	0.8164	0.98067	0.69128	0.79394	0.98298	0.42432	0.69295	0.9916	0.52612	0.89477	0.96964	0.05726	0.47676	0.99897	1.12329	1.2681	0.85975	1.44543	1.2669	0.85966	1.17847	1.16502	0.90022	1.28027	1.35944	0.81731	0.81141	0.94628	0.96168	0.32215	-0.05362	1	0.05518	-0.14838	1	0.15699	0.05657	1	-0.31187	-0.35089	0.99982	-0.26696
ENST00000225655	0.31537	0.92793	0.97816	0.18961	1.1718	0.90478	-0.03151	0.07648	1	0.10767	0.77457	0.98736	0.06199	0.6715	0.99411	0.09416	0.64066	0.99545	0.06023	0.55553	0.99794	-0.22112	-1.02206	0.94908	-0.08193	-0.3796	0.99977	-0.12761	-0.46582	0.99924	-0.09545	-0.49412	0.99894	-0.12938	-0.58435	0.99726	0.13919	0.65126	0.99502	0.0935	0.55654	0.99791	0.12567	0.52779	0.99845	0.09174	0.44713	0.9994	-0.04568
ENST00000225665	1.39593	0.22325	0.56656	0.13638	1.00264	0.95356	0.01319	0.14029	1	0.21957	2.03705	0.39117	0.05007	0.30624	0.99993	0.08775	0.34623	0.99986	-0.02229	-0.70362	0.99242	-0.12319	-0.79265	0.98574	0.08319	1.03467	0.94606	-0.08631	-0.65845	0.99471	-0.04863	-0.61482	0.99637	-0.15867	-1.658	0.64426	0.20639	1.7587	0.57623	0.03688	0.15019	1	0.07456	0.18805	1	-0.03548	-0.79104	0.98589	-0.1695
ENST00000225688	4.44542	0.00048	0.01063	0.73513	3.76569	0.00381	0.08658	1.14324	0.91419	0.49055	2.93196	0.05553	0.9339	4.10493	0.00113	0.51203	2.98479	0.04763	0.48451	2.81382	0.07606	-0.64855	-2.41749	0.19544	-0.24457	-0.77353	0.98723	0.19877	0.55016	0.99799	-0.2231	-0.68404	0.99338	-0.25061	-0.82434	0.98226	0.40398	1.63984	0.65657	0.84732	2.82488	0.07537	0.42545	1.70581	0.6127	0.39794	1.56807	0.70283	0.44334
ENST00000225696	1.16192	0.33124	0.6707	-0.6139	-1.68214	0.64495	-1.35351	-3.04611	0.12221	-0.78283	-1.63059	0.67155	-0.2355	-1.02178	0.9312	-0.31511	-1.1015	0.90981	-0.1976	-0.72397	0.98613	-0.7396	-1.42285	0.7803	-0.16893	0.01657	1	0.3784	0.68352	0.98945	0.29879	0.47765	0.99853	0.41631	0.85347	0.97053	0.57068	1.41076	0.78671	1.11801	2.10361	0.42371	1.0384	1.80547	0.5704	1.15591	2.18241	0.37832	0.54733
ENST00000225698	1.41894	0.21429	0.55681	-3e-05	-0.03653	1	-0.0644	-0.65564	0.99483	0.08759	1.24044	0.8783	-0.08981	-1.03566	0.94579	-0.00735	-0.22258	0.99999	-0.10038	-1.43443	0.78313	-0.06436	-0.6154	0.99635	0.08763	1.26134	0.86946	-0.08978	-0.98925	0.95644	-0.00732	-0.18518	1	-0.10035	-1.38518	0.80996	0.15199	1.79587	0.55094	-0.02541	-0.33364	0.99989	0.05705	0.42323	0.99956	-0.03598	-0.70444	0.99237	-0.1774
ENST00000225719	0.74613	0.6138	0.84913	0.05534	0.62269	0.99608	0.05233	0.6821	0.99355	0.19416	2.00583	0.41198	0.09787	0.80874	0.98407	0.10016	1.13086	0.91849	0.07696	0.61737	0.99626	-0.003	0.09878	1	0.13882	1.37688	0.81407	0.04253	0.20639	0.99999	0.04483	0.52433	0.9985	0.02162	0.01324	1	0.14182	1.1979	0.89491	0.04554	0.09867	1	0.04783	0.39769	0.99969	0.02462	-0.08383	1	-0.09629
ENST00000225724	0.2723	0.94895	0.98622	0.31426	0.21171	0.99999	0.20442	0.68382	0.99347	-0.16018	-0.34579	0.99986	-0.11273	-0.38627	0.99974	-0.09273	-0.02229	1	0.26708	0.37163	0.99979	-0.10984	0.46769	0.99922	-0.47444	-0.54308	0.99817	-0.427	-0.57861	0.99739	-0.407	-0.22649	0.99999	-0.04718	0.15946	1	-0.3646	-0.99521	0.95503	-0.31715	-1.02166	0.94902	-0.29715	-0.68452	0.99344	0.06266	-0.30611	0.99993	0.04744
ENST00000225726	0.79191	0.57824	0.83104	-0.31859	-1.61121	0.67514	-0.16914	-0.78036	0.98683	-0.22507	-0.98385	0.95752	0.02019	0.15938	1	-0.17594	-1.16948	0.90552	-0.05347	-0.38919	0.99973	0.14944	0.72492	0.99108	0.09352	0.60378	0.99671	0.33877	1.69835	0.61732	0.14264	0.38087	0.99976	0.26512	1.16279	0.90789	-0.05593	-0.15066	1	0.18933	0.90005	0.97258	-0.0068	-0.34327	0.99987	0.11567	0.38953	0.99973	0.24526
ENST00000225728	3.25141	0.00571	0.06619	0.22273	1.53059	0.72552	-0.25073	-1.70462	0.61531	0.10569	0.61613	0.99607	0.04656	0.22528	0.99999	-0.25891	-1.31589	0.84242	-0.27341	-2.00356	0.42117	-0.47346	-3.11141	0.042	-0.11704	-0.88469	0.97348	-0.17616	-1.25001	0.87107	-0.48163	-2.77381	0.09642	-0.49613	-3.45174	0.01601	0.35642	2.23685	0.29055	0.2973	1.85396	0.51776	-0.00817	0.42235	0.99954	-0.02268	-0.22436	0.99999	-0.05913
ENST00000225729	0.80023	0.57158	0.82744	0.21842	0.40087	0.99967	0.29599	0.56484	0.99768	0.07634	0.07359	1	-0.04659	-0.3002	0.99994	-0.3866	-1.26406	0.86762	0.41527	0.589	0.99707	0.07757	0.18739	1	-0.14208	-0.31674	0.99992	-0.26501	-0.67439	0.99382	-0.60502	-1.61577	0.67232	0.19684	0.19962	0.99999	-0.21965	-0.48265	0.99904	-0.34258	-0.81505	0.98315	-0.68258	-1.69094	0.62289	0.11928	0.00652	1	-0.12293
ENST00000225737	1.28504	0.26916	0.61408	-0.05753	-0.47981	0.99908	-0.05071	-0.42086	0.99957	0.04338	0.456	0.99932	0.07029	0.82302	0.98242	9e-05	0.2879	0.99995	-0.14608	-1.6809	0.62933	0.00682	0.02998	1	0.10092	0.91778	0.96951	0.12782	1.27246	0.86392	0.05762	0.7458	0.98952	-0.08854	-1.19925	0.89414	0.09409	0.83637	0.98093	0.121	1.17431	0.90323	0.0508	0.67515	0.99386	-0.09537	-1.15994	0.90845	0.02691
ENST00000225742	1.23788	0.29261	0.63776	-0.80251	-1.20858	0.87527	-0.70465	-2.43186	0.2801	-1.10182	-2.34426	0.30974	-0.14078	-0.59962	0.9948	0.06362	-0.31163	0.99986	-0.54852	-1.14784	0.89818	0.09786	-1.30875	0.83672	-0.2993	-1.14616	0.90322	0.66173	0.59166	0.99558	0.86614	0.83423	0.97469	0.254	0.00154	1	-0.39717	0.23705	0.99998	0.56387	1.83675	0.55546	0.76827	2.0186	0.45964	0.15613	1.25766	0.85922	0.96103
ENST00000225777	1.97389	0.07562	0.33257	-0.54915	-2.59153	0.12873	-0.21907	-1.14132	0.91528	0.01522	-0.51755	0.99862	-0.42009	-2.0451	0.38624	-0.5599	-2.62111	0.11982	-0.39303	-1.67245	0.63462	0.33008	1.27141	0.8651	0.56437	1.98465	0.4246	0.12906	0.46529	0.99924	-0.01075	-0.1006	1	0.15612	0.85114	0.97939	0.23429	0.62263	0.99611	-0.20102	-0.80183	0.98485	-0.34083	-1.33319	0.83641	-0.17396	-0.44876	0.99939	-0.43531
ENST00000225792	6.06484	2e-05	0.00074	0.52897	3.18217	0.02519	0.15143	0.99058	0.9561	0.50963	3.17418	0.02583	0.44508	2.66889	0.10727	-0.17623	-1.56102	0.70733	0.20846	1.61131	0.67507	-0.37754	-1.98898	0.42226	-0.01934	0.03305	1	-0.08388	-0.4096	0.99964	-0.70519	-4.57375	0.00011	-0.3205	-1.49414	0.74844	0.3582	1.99395	0.41907	0.29366	1.54527	0.71721	-0.32766	-2.3941	0.2017	0.05703	0.54097	0.99822	-0.06454
ENST00000225805	0.79287	0.57747	0.83047	-0.86235	-1.39851	0.79162	-0.38685	-1.19177	0.88069	0.31114	0.31396	0.99985	-0.6591	-1.22618	0.86724	-0.11045	-0.28025	0.99993	-0.84883	-1.76149	0.59528	0.4755	0.10381	1	1.17349	1.72331	0.62131	0.20325	0.14519	1	0.75189	1.04414	0.93121	0.01352	-0.42498	0.99938	0.69799	1.4896	0.74457	-0.27225	0.03272	1	0.2764	0.87062	0.9687	-0.46198	-0.49584	0.99841	-0.97024
ENST00000225831	1.55746	0.16709	0.49531	0.29337	0.89743	0.9711	0.70369	1.64388	0.65564	0.90924	2.20515	0.31748	0.81762	2.08128	0.38537	0.312	1.09012	0.92797	-0.12182	-0.00543	1	0.41032	0.80736	0.98271	0.61587	1.31853	0.83848	0.52426	1.20586	0.88673	0.01863	0.22007	0.99999	-0.41519	-0.86795	0.97558	0.20555	0.44251	0.99934	0.11394	0.34484	0.99984	-0.39169	-0.57929	0.99707	-0.82551	-1.59538	0.68586	-0.09162
ENST00000225873	0.69892	0.65102	0.86689	0.79745	1.71851	0.61115	0.45715	0.99367	0.95124	0.60392	1.64244	0.6577	0.88406	1.19311	0.88885	0.68651	1.47093	0.75874	0.55169	0.65866	0.99388	-0.3403	-0.61796	0.99547	-0.19353	-0.05965	1	0.08662	-0.44833	0.99919	-0.11094	-0.17883	1	-0.24576	-0.9727	0.95477	0.14677	0.55644	0.99747	0.42692	0.17019	1	0.22936	0.42722	0.99943	0.09454	-0.32834	0.99988	0.28015
ENST00000225916	1.31009	0.25947	0.60486	0.13174	0.85688	0.97859	-0.0407	-0.33593	0.99989	-0.1357	-0.80287	0.98469	0.116	0.91179	0.9707	-0.12929	-0.51752	0.99861	-0.25157	-1.31695	0.84409	-0.17244	-1.12753	0.9196	-0.26744	-1.62554	0.6658	-0.01574	0.08042	1	-0.26103	-1.3345	0.83558	-0.38331	-2.12918	0.33635	-0.095	-0.41434	0.99961	0.15669	1.17244	0.90435	-0.08859	-0.15601	1	-0.21087	-0.89864	0.97278	0.25169
ENST00000225927	3.57765	0.00296	0.04131	0.02213	0.34644	0.99986	0.36219	3.30019	0.01813	0.20174	1.83324	0.5263	0.25651	2.16293	0.31846	0.26071	2.69147	0.10292	0.31693	3.1513	0.02871	0.34006	2.95889	0.05088	0.17961	1.47444	0.75993	0.23438	1.81349	0.53981	0.23858	2.33724	0.22891	0.2948	2.79971	0.07811	-0.16044	-1.5428	0.71866	-0.10568	-1.17221	0.90412	-0.10148	-0.69306	0.99294	-0.04525	-0.27404	0.99996	0.05477
ENST00000225941	1.5843	0.15967	0.485	1.0189	1.6025	0.68143	-0.2372	-0.39385	0.99969	0.41605	0.86331	0.97637	1.08692	1.85673	0.52004	-0.29349	-0.2582	0.99997	-0.1264	-0.26682	0.99997	-1.2561	-1.8867	0.4994	-0.60285	-0.72624	0.99006	0.06802	0.29269	0.99994	-1.31239	-1.82097	0.54106	-1.1453	-1.81266	0.54663	0.65326	1.1913	0.89439	1.32412	2.12116	0.36033	-0.05628	0.1454	1	0.1108	0.13228	1	0.67087
ENST00000225964	2.77048	0.01535	0.12998	-0.34869	-0.98074	0.95824	0.4701	1.34584	0.83016	0.22928	1.24511	0.87638	0.46769	1.59784	0.68379	0.73245	2.34177	0.22437	0.51288	1.83862	0.52178	0.81879	2.23092	0.27901	0.57797	2.19368	0.299	0.81638	2.51873	0.15273	1.08114	3.24785	0.02008	0.86158	2.76269	0.08367	-0.24082	-0.17838	1	-0.00241	0.18412	1	0.26235	0.89111	0.97398	0.04279	0.40703	0.99965	0.23841
ENST00000225969	0.98526	0.4392	0.75001	0.09452	0.48967	0.99898	-0.04253	-0.65878	0.99466	0.23259	1.48905	0.75137	0.03992	0.06837	1	0.17396	1.19422	0.89629	0.15192	0.61709	0.99627	-0.13705	-1.10108	0.9277	0.13807	0.98828	0.95642	-0.0546	-0.39934	0.99968	0.07944	0.70831	0.99209	0.0574	0.14204	1	0.27512	2.01454	0.4067	0.08245	0.69442	0.99289	0.21649	1.73652	0.59171	0.19445	1.20424	0.89248	-0.19266
ENST00000225972	1.51908	0.17902	0.51209	-0.05482	-0.77183	0.98752	-0.13333	-1.63908	0.65693	0.01744	0.83678	0.981	-0.00254	0.40458	0.99966	0.00338	0.57408	0.9975	-0.06885	-0.83619	0.98108	-0.07851	-0.90398	0.9719	0.07226	1.58146	0.69434	0.05228	1.14064	0.9152	0.0582	1.31036	0.84708	-0.01404	-0.0826	1	0.15077	2.38732	0.20585	0.13079	1.9575	0.44327	0.13671	2.11948	0.34244	0.06448	0.80646	0.98431	-0.01998
ENST00000225983	1.52658	0.17507	0.50677	-0.05475	0.01149	1	0.41776	2.17108	0.31175	0.0021	0.03249	1	-0.10057	-0.64458	0.99529	0.09294	0.59407	0.997	0.14742	0.99637	0.9549	0.47251	2.1467	0.32558	0.05685	0.02102	1	-0.04582	-0.65076	0.99504	0.14769	0.57876	0.9974	0.20217	0.97805	0.95877	-0.41566	-2.10016	0.35281	-0.51833	-2.69129	0.10089	-0.32482	-1.54745	0.71587	-0.27034	-1.18821	0.89878	-0.10267
ENST00000226004	1.02838	0.41025	0.73089	-0.38272	-2.26211	0.26295	-0.19878	-1.14761	0.91317	-0.06815	-0.67483	0.99395	-0.1058	-0.86864	0.97713	-0.18962	-1.24354	0.87702	-0.09714	-0.45418	0.99934	0.18394	0.96964	0.96047	0.31457	1.53168	0.72567	0.27692	1.30523	0.84975	0.1931	0.93635	0.96669	0.28558	1.73558	0.592	0.13064	0.48862	0.999	0.09299	0.29074	0.99995	0.00916	-0.05882	1	0.10165	0.68827	0.99327	-0.03765
ENST00000226021	2.63631	0.02029	0.15553	0.03332	0.28947	0.99995	0.17954	1.60982	0.67602	-0.04295	-0.9271	0.9683	-0.07941	-0.70514	0.99233	-0.02813	-0.18882	1	0.26104	2.31765	0.23554	0.14622	1.33063	0.83766	-0.07627	-1.19686	0.89559	-0.11273	-0.97633	0.95914	-0.06145	-0.46424	0.99925	0.22772	2.02494	0.39881	-0.22249	-2.42636	0.18764	-0.25894	-2.21005	0.29009	-0.20767	-1.72639	0.59822	0.08151	0.60729	0.99661	-0.03645
ENST00000226067	1.52617	0.17698	0.50942	0.63295	2.4876	0.16851	0.08415	0.17173	1	0.26813	1.12679	0.91946	0.10318	0.44819	0.99938	0.3907	1.79537	0.55228	0.1335	0.94221	0.96536	-0.54881	-2.14202	0.33172	-0.36482	-1.323	0.84055	-0.52978	-1.95988	0.44337	-0.24225	-0.63188	0.9957	-0.49946	-1.49586	0.74713	0.18399	0.87317	0.97624	0.01903	0.24905	0.99998	0.30656	1.50046	0.74443	0.04935	0.70786	0.99207	-0.16496
ENST00000226094	0.98446	0.43948	0.75009	1.29271	1.62383	0.67364	0.79595	1.44994	0.76643	0.39221	0.24264	0.99998	-0.03048	0.01062	1	1.1475	1.54649	0.71507	-0.05855	-0.3988	0.99959	-0.49677	-0.02754	1	-0.90051	-1.3338	0.82031	-1.32319	-1.57533	0.69993	-0.14521	0.03517	1	-1.35126	-1.95876	0.49052	-0.40374	-1.18788	0.88372	-0.82643	-1.40889	0.78702	0.35156	0.05767	1	-0.85449	-1.7738	0.58636	-0.42269
ENST00000226105	0.87993	0.51244	0.79652	0.05073	0.52587	0.99841	0.06614	0.55786	0.99779	0.0946	0.70334	0.99213	0.17467	1.14023	0.91383	-0.10038	-0.71418	0.9915	0.19885	1.28783	0.85606	0.01541	0.06768	1	0.04387	0.18259	1	0.12394	0.62541	0.9958	-0.15111	-1.21028	0.8888	0.14812	0.77557	0.98678	0.02846	0.1041	1	0.10852	0.52064	0.99849	-0.16652	-1.19698	0.8939	0.13271	0.66144	0.99434	0.08007
ENST00000226207	22.252	0	0	-0.85473	-2.70772	0.09625	1.91675	4.64693	7e-05	-1.1903	-4.06393	0.00095	-0.63935	-1.87327	0.49821	1.28065	3.78145	0.00297	1.08158	3.69574	0.00412	2.77147	6.75005	0	-0.33558	-1.40768	0.79796	0.21538	0.75304	0.98912	2.13538	6.13673	0	1.93631	6.13335	0	-3.10705	-7.72359	0	-2.5561	-6.06188	0	-0.63609	-1.13472	0.91751	-0.83516	-1.30193	0.85135	0.55095
ENST00000226225	4.21169	0.00078	0.01546	0.14882	2.39713	0.20097	0.10058	1.45558	0.77101	0.24598	3.86533	0.0023	0.13563	1.91696	0.46959	0.11073	1.92461	0.46442	-0.01824	-0.52472	0.9985	-0.04824	-0.77662	0.98713	0.09716	1.49019	0.75076	-0.01319	-0.39255	0.99971	-0.03809	-0.39095	0.99972	-0.16706	-2.82769	0.07124	0.1454	2.16452	0.31626	0.03505	0.3836	0.99975	0.01015	0.38656	0.99974	-0.11882	-1.89431	0.48461	-0.11035
ENST00000226230	1.59735	0.15531	0.47855	-0.12848	-1.28975	0.85612	-0.06401	-0.75777	0.98855	-0.30125	-2.83176	0.07339	-0.02993	-0.45813	0.99929	-0.1277	-1.29021	0.85596	-0.02512	-0.80403	0.9844	0.06448	0.44259	0.99942	-0.17277	-1.5327	0.72483	0.09855	0.77454	0.98713	0.00078	-0.04187	1	0.10336	0.43599	0.99947	-0.23724	-1.86937	0.50275	0.03407	0.30022	0.99994	-0.06369	-0.46825	0.9992	0.03889	-0.02017	1	0.27132
ENST00000226253	1.18109	0.32199	0.66365	1.80139	2.52579	0.23631	0.66825	0.81952	0.97987	1.83713	2.46992	0.26208	1.29284	1.81166	0.56317	1.16714	1.14265	0.90557	0.65105	1.3162	0.8371	-1.13314	-1.50143	0.73929	0.03574	-0.02741	1	-0.50855	-0.63189	0.99343	-0.63425	-1.20893	0.87565	-1.15034	-1.09973	0.91568	1.16889	1.46026	0.76056	0.62459	0.87462	0.96994	0.4989	0.28897	0.99993	-0.01719	0.42636	0.9994	-0.5443
ENST00000226279	7.29831	0	0.0001	-0.49916	-4.02961	0.00116	-0.21714	-1.81096	0.54083	-0.63148	-5.08739	1e-05	-0.48413	-3.98144	0.00141	-0.7207	-5.68847	0	-0.38945	-3.35045	0.01453	0.28202	1.93355	0.4583	-0.13232	-1.10163	0.92774	0.01503	-0.07003	1	-0.22153	-1.777	0.56388	0.10972	0.54839	0.99808	-0.41434	-2.92705	0.05379	-0.26699	-1.94612	0.45003	-0.50355	-3.5234	0.00798	-0.1723	-1.36949	0.81808	0.14735
ENST00000226299	1.68703	0.13099	0.43953	0.50036	0.67018	0.99362	-0.94946	-0.7503	0.98873	1.06067	1.45684	0.76742	1.09478	1.00431	0.94945	-0.75395	-1.21602	0.88569	-0.26237	-0.32046	0.99991	-1.44981	-1.39235	0.80361	0.56031	0.79923	0.98336	0.59442	0.36792	0.99977	-1.25431	-1.84864	0.52191	-0.76272	-0.9656	0.95909	2.01012	2.13601	0.35099	2.04424	1.67619	0.6352	0.1955	-0.45273	0.99932	0.68709	0.41397	0.99959	0.03412
ENST00000226319	0.45821	0.83794	0.94606	0.46404	0.50944	0.9987	-0.08884	-0.00201	1	-0.40935	-0.44102	0.99944	0.21696	0.41076	0.99962	-0.60323	-0.83683	0.98091	0.13717	0.29816	0.99994	-0.55288	-0.47563	0.99912	-0.87339	-0.92492	0.9682	-0.24708	-0.08685	1	-1.06727	-1.29691	0.85286	-0.32687	-0.20345	0.99999	-0.32051	-0.40356	0.99966	0.3058	0.38447	0.99974	-0.51439	-0.76656	0.98788	0.22601	0.27885	0.99996	0.62631
ENST00000226328	0.90583	0.49397	0.78556	-0.03457	0.09969	1	-0.28275	-1.37045	0.81668	0.28095	0.67542	0.99373	0.0192	0.1289	1	-0.22936	-0.80971	0.98371	-0.18617	-0.6679	0.99414	-0.24818	-1.44927	0.77397	0.31552	0.57115	0.9975	0.05377	0.03182	1	-0.19479	-0.89655	0.97262	-0.1516	-0.75788	0.98845	0.5637	1.95219	0.44982	0.30195	1.43908	0.77966	0.05339	0.564	0.99769	0.09658	0.70025	0.99244	-0.26175
ENST00000226574	1.93892	0.08117	0.34395	-1.70711	-2.66029	0.12361	0.22723	-0.26119	0.99997	-1.47901	-2.47168	0.18596	-0.78683	-1.50079	0.74318	-0.96168	-1.6431	0.65532	-0.53597	-0.83759	0.97989	1.93434	2.0924	0.37067	0.2281	0.10368	1	0.92027	1.04335	0.94234	0.74542	0.90955	0.97037	1.17114	1.70554	0.61415	-1.70624	-1.94783	0.45836	-1.01406	-1.09863	0.92563	-1.18891	-1.22306	0.88226	-0.7632	-0.50553	0.99867	0.69218
ENST00000226725	1.03731	0.40548	0.72775	0.21136	1.27322	0.86237	0.30381	1.79925	0.55206	0.06395	0.53352	0.99828	0.26986	1.66099	0.64347	0.12837	0.82004	0.98238	0.02569	0.03753	1	0.09245	0.60616	0.99646	-0.14741	-0.71563	0.99131	0.0585	0.42089	0.99955	-0.08299	-0.40622	0.99963	-0.18567	-1.18497	0.89819	-0.23986	-1.26932	0.86392	-0.03395	-0.19533	1	-0.17543	-0.96984	0.95918	-0.27812	-1.70188	0.61656	0.20591
ENST00000226760	0.22183	0.96909	0.99241	0.12254	0.30143	0.99994	-0.02805	0.2476	0.99998	-0.30864	-0.53865	0.9982	0.28713	0.35861	0.99982	0.24048	0.19921	0.99999	-0.0192	-0.30524	0.99993	-0.15059	-0.03815	1	-0.43118	-0.82681	0.98166	0.16459	0.06869	1	0.11794	-0.087	1	-0.14174	-0.58831	0.99704	-0.28059	-0.74695	0.98922	0.31518	0.10239	1	0.26853	-0.04651	1	0.00886	-0.52385	0.99845	0.59577
ENST00000226796	0.80838	0.56568	0.82444	0.19425	-0.18363	1	-0.42011	-0.83892	0.97886	0.9449	1.16282	0.90009	-0.60657	-0.73351	0.98937	0.23514	0.54361	0.99786	-0.09489	-0.19027	1	-0.61435	-0.65063	0.99433	0.75065	1.31713	0.83604	-0.80082	-0.53668	0.99802	0.04089	0.70909	0.99087	-0.28914	-0.01016	1	1.36501	1.89871	0.50082	-0.18646	0.14236	1	0.65524	1.31529	0.83989	0.32522	0.62965	0.99533	-1.55147
ENST00000226798	5.15754	0.00011	0.00339	0.1508	2.06413	0.37595	-0.15538	-2.19761	0.29848	0.07326	1.05137	0.94156	0.20305	2.46087	0.17651	-0.04596	-0.71353	0.99177	-0.05853	-0.75222	0.9891	-0.30618	-4.0928	0.00098	-0.07754	-0.97104	0.95996	0.05225	0.46797	0.99921	-0.19675	-2.68288	0.10479	-0.20933	-2.73211	0.09253	0.22864	3.11695	0.03161	0.35843	4.39534	0.00028	0.10943	1.44936	0.7745	0.09685	1.42155	0.7901	0.12979
ENST00000227065	2.22496	0.04626	0.25427	-0.26869	-0.42382	0.9995	1.84619	3.18086	0.06499	-0.13272	-0.22858	0.99999	0.09408	-0.09805	1	0.29052	0.53049	0.99821	0.72694	0.99095	0.95268	2.11488	3.53642	0.03224	0.13597	0.18912	1	0.36278	0.309	0.99992	0.55921	0.92982	0.96544	0.99563	1.38176	0.80764	-1.97891	-3.34037	0.04709	-1.7521	-3.17959	0.06583	-1.55567	-2.59854	0.18404	-1.11925	-2.16157	0.36371	0.22681
ENST00000227155	3.27489	0.0054	0.06359	0.20748	1.97498	0.43234	0.08904	0.68403	0.99343	0.48899	3.79335	0.0033	0.03747	0.71689	0.99154	-0.00148	0.09676	1	0.23438	1.37694	0.81395	-0.11845	-1.15335	0.9108	0.28151	1.84203	0.52069	-0.17002	-1.18982	0.89773	-0.20896	-1.80099	0.54816	0.0269	-0.52427	0.99849	0.39995	2.86839	0.06556	-0.05157	0.00525	1	-0.09051	-0.56973	0.9976	0.14535	0.62566	0.99596	-0.45153
ENST00000227157	2.27225	0.04191	0.24031	-1.10066	-2.17888	0.40504	-0.30242	-0.61441	0.99355	-2.11905	-3.84956	0.04598	-0.55459	-0.80279	0.97624	-0.17207	-0.19844	0.99999	-0.75788	-1.28351	0.8405	0.79824	1.38499	0.7959	-1.0184	-1.59888	0.68574	0.54606	1.29954	0.83578	0.92859	1.83346	0.56545	0.34278	0.73868	0.98591	-1.81663	-2.89996	0.15442	-0.25217	-0.14162	1	0.13035	0.38972	0.99947	-0.45546	-0.61775	0.99392	1.56446
ENST00000227163	0.45491	0.84029	0.94721	0.69636	1.20529	0.88561	1.36407	1.48748	0.74838	0.86149	1.19381	0.88944	0.84465	0.84447	0.97706	0.52599	0.53119	0.99812	1.164	0.83998	0.97766	0.66771	0.39464	0.9996	0.16513	0.02088	1	0.14829	-0.30814	0.99991	-0.17038	-0.61423	0.99567	0.46764	-0.2726	0.99996	-0.50258	-0.36701	0.99974	-0.51942	-0.66301	0.99289	-0.83809	-0.94074	0.96032	-0.20007	-0.62293	0.9949	-0.01684
ENST00000227214	0.99135	0.43505	0.74716	-0.64558	-0.99184	0.95461	0.03922	0.25816	0.99997	0.11276	0.17182	1	-0.67219	-1.01246	0.94989	0.34211	0.69252	0.99264	0.33484	0.73756	0.9897	0.6848	1.16941	0.90361	0.75834	1.13362	0.91589	-0.02661	-0.05	1	0.98769	1.61504	0.67314	0.98042	1.66175	0.64308	0.07354	-0.09293	1	-0.71142	-1.18674	0.89723	0.30288	0.40242	0.99965	0.29561	0.44609	0.99936	-0.78496
ENST00000227266	6.08891	2e-05	0.00072	-0.4893	-3.23903	0.02209	0.09736	1.38377	0.8102	-0.29016	-1.48932	0.75112	-0.16267	-0.43807	0.99946	0.13386	1.57257	0.69998	0.09986	1.09535	0.92919	0.58667	4.38248	0.00032	0.19915	1.69793	0.61788	0.32663	2.68503	0.10527	0.62316	4.67449	9e-05	0.58916	4.2171	0.00062	-0.38752	-2.74681	0.09044	-0.26004	-1.75362	0.58054	0.03649	0.13268	1	0.00249	-0.31622	0.99992	0.12749
ENST00000227322	0.89294	0.50303	0.79094	-0.0627	-0.59486	0.99695	-0.08557	-0.81039	0.98389	0.06446	1.0357	0.94553	-0.01705	-0.00301	1	-0.03153	-0.15288	1	0.06377	0.8783	0.97568	-0.02288	-0.25097	0.99998	0.12716	1.60168	0.68135	0.04564	0.56545	0.9977	0.03117	0.41915	0.99958	0.12647	1.4433	0.77792	0.15003	1.7546	0.57951	0.06852	0.77586	0.98715	0.05405	0.63821	0.99551	0.14935	1.60366	0.68007	-0.08152
ENST00000227378	0.65335	0.68733	0.88388	0.51066	1.05071	0.93993	0.25341	0.43548	0.99945	0.23587	-0.01436	1	-0.14788	-0.74441	0.98923	0.37518	0.72795	0.9904	0.19438	-0.02666	1	-0.25725	-0.54412	0.99803	-0.2748	-1.0259	0.94606	-0.65855	-1.75113	0.58488	-0.13548	-0.276	0.99996	-0.31628	-1.03985	0.94285	-0.01755	-0.43414	0.99945	-0.4013	-1.11155	0.92261	0.12177	0.26334	0.99997	-0.05903	-0.44665	0.99936	-0.38375
ENST00000227451	0.79486	0.576	0.82989	-0.07225	0.28008	0.99996	-0.25568	-0.57824	0.99724	-0.50772	-0.74596	0.98908	0.24764	0.77333	0.98661	-0.12306	-0.07906	1	-0.66708	-1.09914	0.92667	-0.18343	-0.84685	0.97893	-0.43547	-1.03157	0.94499	0.31989	0.50924	0.99863	-0.05081	-0.35038	0.99984	-0.59483	-1.39022	0.80555	-0.25204	-0.12149	1	0.50332	1.2894	0.85414	0.13262	0.48586	0.99897	-0.4114	-0.45605	0.99929	0.75536
ENST00000227471	3.93768	0.00138	0.0236	0.53393	3.27208	0.02086	0.39235	2.25113	0.27262	0.57455	3.20812	0.02542	0.77222	4.21331	0.00078	0.46643	2.81092	0.07744	0.5549	3.32288	0.01758	-0.14158	-0.8046	0.98429	0.04061	-0.00842	1	0.23829	1.07829	0.93356	-0.06751	-0.36017	0.99982	0.02097	0.13588	1	0.1822	0.78477	0.9862	0.37987	1.79713	0.55196	0.07407	0.44431	0.99941	0.16255	0.91589	0.96971	0.19767
ENST00000227474	0.83902	0.54244	0.81243	-0.32196	-0.42863	0.9995	-0.65809	-1.00215	0.95241	-0.42207	-0.46077	0.99925	-0.67804	-0.72053	0.991	0.72566	1.01293	0.94927	-0.88785	-0.96691	0.95996	-0.33613	-0.58775	0.99704	-0.10011	-0.03113	1	-0.35608	-0.29303	0.99995	1.04761	1.40188	0.7989	-0.56589	-0.53726	0.99821	0.23602	0.55888	0.99777	-0.01995	0.30292	0.99993	1.38374	1.89886	0.4874	-0.22976	0.07048	1	-0.25597
ENST00000227495	0.88996	0.5046	0.79197	0.48433	0.71151	0.98993	0.77052	1.14085	0.90395	0.90679	1.57825	0.69738	0.61043	1.48246	0.7501	1.35296	2.48166	0.25333	0.89401	1.29786	0.84241	0.28619	0.47734	0.99873	0.42246	0.86308	0.97126	0.1261	0.77114	0.98367	0.86863	1.76905	0.59219	0.40968	0.6156	0.995	0.13627	0.32816	0.99984	-0.16009	0.24439	0.99997	0.58243	1.17674	0.88714	0.12349	0.11796	1	-0.29636
ENST00000227503	0.60267	0.72775	0.90187	-0.0709	-0.36398	0.99981	0.24608	0.87747	0.97536	-0.09133	-0.56806	0.99759	-0.09085	-0.59161	0.99697	0.10815	0.17813	1	0.12311	0.61751	0.99618	0.31698	1.20127	0.89259	-0.02042	-0.20608	0.99999	-0.01995	-0.23698	0.99998	0.17906	0.52173	0.9985	0.19402	0.9592	0.9618	-0.3374	-1.37963	0.81176	-0.33693	-1.38817	0.80722	-0.13792	-0.67598	0.99371	-0.12297	-0.27814	0.99996	0.00048
ENST00000227507	6.96913	0	0.00017	0.46122	2.73498	0.09161	0.52538	2.99013	0.04582	0.79921	4.38187	0.00029	1.20126	5.41268	0	0.77752	4.13111	0.00083	0.25874	1.80027	0.54831	0.06416	0.44405	0.99942	0.33799	1.7116	0.60867	0.74005	2.87727	0.06428	0.3163	1.50802	0.74	-0.20247	-0.86687	0.97725	0.27383	1.17888	0.90184	0.67589	2.31235	0.24136	0.25214	0.99355	0.95528	-0.26663	-1.24857	0.87461	0.40205
ENST00000227520	2.26766	0.0426	0.2425	-0.30431	-3.25853	0.02044	-0.13189	-1.45024	0.77393	-0.22495	-2.30772	0.24252	-0.23367	-2.33919	0.22793	-0.11286	-1.04496	0.94319	-0.23737	-2.35384	0.2209	0.17242	1.57506	0.69841	0.07936	0.89278	0.97357	0.07064	0.80531	0.98439	0.19145	2.08755	0.36169	0.06694	0.80517	0.98442	-0.09306	-0.71757	0.99151	-0.10178	-0.77533	0.98719	0.01903	0.42638	0.99954	-0.10548	-0.78512	0.98633	-0.00872
ENST00000227524	1.32156	0.25415	0.59944	-0.07153	-0.83815	0.98092	-0.00664	0.13848	1	0.05991	1.11051	0.92505	-0.05304	-0.55238	0.998	0.07945	1.35341	0.82629	-0.04969	-0.4225	0.99957	0.06488	0.91583	0.97012	0.13143	1.91539	0.47032	0.01849	0.25682	0.99998	0.15098	2.14393	0.32735	0.02184	0.38802	0.99973	0.06655	0.89756	0.97298	-0.0464	-0.64858	0.99512	0.0861	1.12955	0.91906	-0.04304	-0.52863	0.99844	-0.11295
ENST00000227525	9.03447	0	1e-05	-0.36951	-3.94894	0.00156	0.25419	2.27194	0.2581	-0.27778	-2.62398	0.1191	-0.29333	-2.729	0.0915	0.04845	0.55409	0.99797	0.02198	-0.01096	1	0.6237	5.87367	0	0.09173	1.26906	0.86612	0.07618	1.10189	0.92772	0.41796	4.32283	0.00032	0.39149	3.78171	0.00302	-0.53197	-4.64538	7e-05	-0.54752	-4.72036	5e-05	-0.20574	-1.67815	0.63082	-0.23221	-2.21012	0.29025	-0.01555
ENST00000227618	0.51903	0.79298	0.92927	-0.61345	-1.23325	0.87925	-0.68895	-1.41969	0.78993	-0.52986	-0.99897	0.95296	-0.40245	-0.65026	0.99479	-0.11492	-0.30743	0.99993	-0.29376	-0.4296	0.99949	-0.07549	-0.25269	0.99998	0.08359	0.2211	0.99999	0.211	0.55012	0.99794	0.49853	0.86941	0.97621	0.31969	0.7666	0.98758	0.15908	0.45889	0.99927	0.28649	0.76718	0.98751	0.57402	1.06692	0.93625	0.39518	0.97261	0.95883	0.12741
ENST00000227638	9.90279	0	0	-1.32831	-6.4808	0	-1.01179	-5.1861	1e-05	-1.28673	-6.05999	0	-1.26518	-5.95715	0	-1.39863	-6.64526	0	-1.00166	-4.48428	0.0002	0.31652	0.93198	0.9673	0.04158	0.37714	0.99977	0.06313	0.37957	0.99976	-0.07032	-0.31551	0.99992	0.32665	1.91302	0.47243	-0.27493	-0.5735	0.99752	-0.25339	-0.55501	0.99793	-0.38683	-1.20296	0.893	0.01013	0.87303	0.97641	0.02155
ENST00000227752	0.13369	0.9917	0.99824	0.02022	-0.5863	0.9955	-0.10393	-0.61112	0.99444	-0.07881	-0.05811	1	-0.05576	-0.56663	0.99622	0.66592	0.26269	0.99995	0.26448	-0.07245	1	-0.12416	-0.06734	1	-0.09903	0.51729	0.99773	-0.07598	0.01157	1	0.6457	0.83023	0.9733	0.24426	0.48218	0.99845	0.02512	0.54637	0.99696	0.04817	0.07717	1	0.76985	0.83315	0.97314	0.36842	0.51725	0.99773	0.02305
ENST00000227756	6.55535	1e-05	0.00034	0.47633	4.81088	6e-05	0.21458	2.87487	0.06544	0.42158	4.5682	0.00016	0.49018	5.01375	2e-05	0.34479	4.00944	0.00155	0.25421	2.89098	0.06238	-0.26175	-1.63179	0.66193	-0.05476	-0.17596	1	0.01384	0.38261	0.99975	-0.13154	-0.66653	0.99423	-0.22212	-1.77956	0.56334	0.20699	1.44215	0.77818	0.2756	1.9411	0.45606	0.13021	0.96157	0.96158	0.03963	-0.08536	1	0.0686
ENST00000227758	1.40721	0.21727	0.5599	-0.79047	-2.13294	0.33445	0.20446	-0.19565	1	-0.56159	-1.71893	0.60356	-0.53249	-1.48032	0.75656	-0.90147	-2.19344	0.30024	-0.4789	-1.07389	0.9356	0.99493	1.70897	0.61031	0.22889	0.36271	0.99982	0.25799	0.57908	0.99738	-0.111	-0.09573	1	0.31158	1.02306	0.94873	-0.76604	-1.35315	0.82621	-0.73695	-1.14433	0.91399	-1.10593	-1.77049	0.5686	-0.68335	-0.77421	0.98732	0.0291
ENST00000227868	0.35177	0.9074	0.97133	0.22636	1.15655	0.9101	0.12918	0.36805	0.99981	0.20764	1.0467	0.943	0.14865	0.60098	0.9968	0.16365	0.31792	0.99992	0.15794	0.90454	0.97194	-0.09717	-0.70182	0.99252	-0.01871	-0.08719	1	-0.07771	-0.50941	0.99873	-0.0627	-0.78448	0.98648	-0.06842	-0.21946	0.99999	0.07846	0.60797	0.99658	0.01946	0.20286	0.99999	0.03447	-0.0577	1	0.02875	0.4818	0.99908	-0.05899
ENST00000227880	1.09827	0.36839	0.6997	0.24457	0.84711	0.97914	-0.17419	-0.4346	0.99947	0.29248	1.13196	0.91657	-0.06203	-0.40868	0.99962	0.49824	1.56769	0.70296	0.09328	0.25262	0.99998	-0.41876	-1.22052	0.88457	0.04791	0.29099	0.99995	-0.30661	-1.20935	0.8887	0.25367	0.74282	0.98938	-0.1513	-0.56118	0.99771	0.46667	1.48269	0.75434	0.11216	0.03258	1	0.67243	1.88651	0.49415	0.26747	0.65371	0.99471	-0.35452
ENST00000228027	4.026	0.00103	0.01914	2.33125	3.25583	0.02922	1.41252	1.89271	0.49019	2.0918	2.94928	0.06264	3.63729	3.86539	0.01096	2.83156	3.39308	0.0222	2.01644	2.33958	0.23902	-0.91873	-1.19558	0.89263	-0.23945	-0.28299	0.99995	1.30604	0.91572	0.96595	0.5003	0.37723	0.99974	-0.31482	-0.7637	0.98726	0.67928	0.91674	0.96837	2.22478	1.9934	0.4423	1.41904	1.49014	0.74899	0.60392	0.41839	0.99956	1.54549
ENST00000228136	2.10767	0.0585	0.28972	-0.12289	-1.85284	0.51221	-0.04879	-0.88357	0.97506	-0.18638	-2.8808	0.06093	-0.12246	-2.04015	0.38945	-0.17422	-2.63585	0.11573	-0.07544	-0.9233	0.96892	0.0741	0.84301	0.98036	-0.06349	-1.0397	0.94478	0.00043	-0.24387	0.99998	-0.05132	-0.83248	0.98159	0.04746	0.87119	0.97678	-0.13758	-1.8063	0.54385	-0.07366	-1.04805	0.94266	-0.12542	-1.60059	0.68202	-0.02664	-0.00501	1	0.06392
ENST00000228140	0.57643	0.74835	0.91099	-0.1106	-0.34552	0.99986	0.04126	0.16928	1	-0.18311	-0.55411	0.99796	-0.14208	-0.30248	0.99994	-0.17138	-0.34707	0.99986	0.13977	1.09848	0.92857	0.15186	0.48658	0.99902	-0.07251	-0.20926	0.99999	-0.03148	0.0327	1	-0.06078	-0.00987	1	0.25037	1.42534	0.78807	-0.22437	-0.67542	0.99389	-0.18334	-0.4434	0.99942	-0.21264	-0.48474	0.99904	0.09851	0.85632	0.97865	0.04103
ENST00000228251	1.02486	0.41344	0.73316	-0.00012	0.15652	1	0.04642	0.60489	0.99669	-0.0692	-0.3019	0.99994	-0.1827	-0.74224	0.98992	0.12958	1.00776	0.95242	0.29825	1.35653	0.82483	0.04654	0.45458	0.99934	-0.06908	-0.45112	0.99937	-0.18258	-0.88528	0.97485	0.1297	0.84763	0.97983	0.29836	1.19738	0.89543	-0.11562	-0.87342	0.97651	-0.22912	-1.27635	0.86295	0.08316	0.35657	0.99984	0.25182	0.69004	0.99318	-0.1135
ENST00000228284	3.23022	0.00591	0.06791	1.17934	1.51496	0.73481	1.63541	1.07401	0.93214	1.81137	1.43027	0.78181	-0.80347	-0.93765	0.96538	-1.3581	-1.33225	0.83558	-1.33063	-1.67657	0.6328	0.45607	-0.23922	0.99998	0.63204	0.06071	1	-1.9828	-2.36482	0.23197	-2.53744	-2.80247	0.08897	-2.50997	-3.11625	0.04015	0.17597	0.27774	0.99995	-2.43887	-1.82371	0.54018	-2.99351	-2.15569	0.33868	-2.96604	-2.43857	0.20613	-2.61484
ENST00000228306	1.37309	0.23214	0.57543	-0.077	0.11187	1	-0.2085	-0.53538	0.99831	0.04094	0.28827	0.99995	-0.53539	-1.99763	0.41736	0.09102	0.46631	0.99923	-0.05461	-0.31594	0.99992	-0.1315	-0.63996	0.99544	0.11794	0.17856	1	-0.4584	-2.10341	0.35213	0.16802	0.35825	0.99983	0.02239	-0.42371	0.99956	0.24944	0.79586	0.98533	-0.3269	-1.35382	0.82589	0.29952	0.95649	0.96283	0.15389	0.22094	0.99999	-0.57633
ENST00000228307	1.89816	0.08648	0.35521	-1.296	-2.40554	0.24407	0.25584	0.20834	0.99999	-0.82806	-1.48783	0.74844	-1.19097	-2.30593	0.28773	-0.6747	-1.14237	0.90711	0.08823	-0.19925	0.99999	1.55184	2.40483	0.25529	0.46795	0.88249	0.97246	0.10503	0.03458	1	0.62131	1.17758	0.89708	1.38423	2.07116	0.40269	-1.08389	-1.5713	0.70091	-1.44681	-2.31711	0.2923	-0.93054	-1.25371	0.86296	-0.16761	-0.38477	0.99965	-0.36292
ENST00000228318	0.71528	0.63808	0.86064	0.10168	0.35738	0.99984	-0.12147	-0.32292	0.99991	0.24565	0.99117	0.95604	0.22266	0.73691	0.99029	0.3107	1.03323	0.9464	0.46903	1.41152	0.79583	-0.22314	-0.65211	0.99498	0.14397	0.63081	0.99582	0.12099	0.38824	0.99973	0.20902	0.68148	0.99362	0.36735	1.05807	0.94007	0.36711	1.24033	0.87836	0.34413	0.99845	0.95446	0.43217	1.27639	0.8629	0.5905	1.63385	0.66028	-0.02298
ENST00000228345	0.37402	0.89413	0.96687	-0.22185	-0.44127	0.99933	0.34899	0.19309	0.99999	-0.48666	-0.68991	0.99226	0.29456	0.50818	0.99845	-0.03354	0.52868	0.99815	-0.16389	0.01327	1	0.57084	0.59227	0.99643	-0.26481	-0.24105	0.99998	0.51641	0.92676	0.96385	0.18831	0.95059	0.96033	0.05796	0.43833	0.99936	-0.83566	-0.81722	0.98088	-0.05443	0.27932	0.99995	-0.38253	0.29585	0.99993	-0.51289	-0.17487	1	0.78123
ENST00000228347	0.96329	0.45396	0.76058	0.18706	1.78848	0.55708	0.13483	0.81611	0.98317	0.13988	1.35572	0.82457	0.00665	0.04014	1	0.17144	1.50827	0.73973	0.09462	0.6919	0.99298	-0.05223	-0.83759	0.98074	-0.04718	-0.39819	0.99969	-0.18041	-1.66869	0.63762	-0.01562	-0.21259	0.99999	-0.09244	-1.02922	0.94687	0.00505	0.45178	0.99935	-0.12818	-0.74738	0.98936	0.0366	0.61103	0.99643	-0.04021	-0.1467	1	-0.13323
ENST00000228425	0.21093	0.97267	0.99327	-0.27753	0.05529	1	-0.21967	0.0056	1	0.23139	0.92845	0.96771	-0.01095	0.41787	0.99959	-0.08339	0.34636	0.99986	-0.18621	0.14975	1	0.05787	-0.04622	1	0.50892	0.8808	0.97518	0.26659	0.3677	0.9998	0.19414	0.295	0.99995	0.09132	0.09675	1	0.45106	0.87105	0.97654	0.20872	0.38904	0.99973	0.13627	0.32084	0.99991	0.03345	0.1355	1	-0.24234
ENST00000228437	0.25655	0.95561	0.98806	-0.00413	-0.33464	0.99989	0.04656	0.22548	0.99999	-0.0641	-0.81189	0.98372	0.06154	0.08381	1	-0.00754	-0.08909	1	0.00568	-0.54634	0.99811	0.05069	0.5331	0.99835	-0.05997	-0.4749	0.99914	0.06567	0.40159	0.99967	-0.00341	0.23291	0.99999	0.00981	-0.21887	0.99999	-0.11067	-0.97253	0.95967	0.01498	-0.13811	1	-0.05411	-0.30014	0.99994	-0.04088	-0.72615	0.99096	0.12564
ENST00000228438	1.53825	0.17315	0.50406	-0.22293	-1.14696	0.9123	-0.33661	-1.92267	0.46838	0.00985	0.39826	0.99968	0.02402	0.18054	1	-0.22409	-0.97171	0.95938	-0.32614	-1.48104	0.75572	-0.11368	-0.83584	0.98083	0.23278	1.51798	0.73365	0.24695	1.27703	0.86127	-0.00116	0.14143	1	-0.10321	-0.36302	0.99981	0.34645	2.26052	0.26996	0.36063	2.01638	0.40894	0.11252	0.94628	0.96436	0.01047	0.47256	0.99915	0.01418
ENST00000228468	2.30319	0.03961	0.23243	-0.45684	-0.9475	0.96151	0.31513	0.88623	0.97166	-0.20055	-0.54959	0.99775	-0.43304	-0.64268	0.9947	0.24682	1.18182	0.8953	0.60468	2.17426	0.3429	0.77197	1.76375	0.58132	0.2563	0.37974	0.99973	0.0238	0.28664	0.99995	0.70366	2.09218	0.38184	1.06153	3.07983	0.06216	-0.51567	-1.38241	0.80631	-0.74817	-1.46885	0.76008	-0.06831	0.24725	0.99998	0.28956	1.1866	0.89239	-0.2325
ENST00000228495	5.1204	0.0001	0.00311	0.58071	3.54089	0.00805	0.48343	2.86003	0.06641	0.35024	2.34508	0.22503	0.93639	5.23811	1e-05	0.41817	2.60266	0.12746	0.49043	2.73926	0.09102	-0.09728	-0.45821	0.9993	-0.23046	-1.15386	0.9106	0.35568	1.86765	0.50379	-0.16254	-0.83537	0.9811	-0.09028	-0.69418	0.99288	-0.13318	-0.63433	0.99564	0.45296	2.21628	0.29022	-0.06526	-0.34209	0.99987	0.007	-0.20946	0.99999	0.58615
ENST00000228506	1.05752	0.39305	0.7192	-0.15434	-1.74019	0.58886	-0.18653	-1.521	0.73225	-0.17349	-1.44131	0.77927	-0.29573	-2.32247	0.23332	-0.08294	-0.88688	0.9746	-0.14311	-1.3534	0.82637	-0.03219	0.10574	1	-0.01915	0.27397	0.99997	-0.14138	-0.62009	0.9962	0.0714	0.78505	0.98644	0.01124	0.33008	0.9999	0.01304	0.15252	1	-0.1092	-0.6847	0.99346	0.10359	0.63517	0.99566	0.04342	0.20709	0.99999	-0.12223
ENST00000228510	0.67723	0.66829	0.8759	-0.64168	-1.43808	0.77972	-0.25088	-0.35837	0.99982	-0.49317	-0.94723	0.96355	-0.77397	-1.66511	0.64072	-0.53483	-1.10672	0.92463	-0.25037	-0.54649	0.99802	0.39079	0.97901	0.95735	0.14851	0.46973	0.99916	-0.13229	-0.26553	0.99997	0.10685	0.29405	0.99995	0.39131	0.83869	0.98023	-0.24229	-0.52971	0.99834	-0.52308	-1.20192	0.89173	-0.28394	-0.68256	0.99329	0.00052	-0.16483	1	-0.2808
ENST00000228515	2.15948	0.05279	0.27364	0.03727	0.56816	0.99764	-0.04478	-0.43192	0.9995	0.12677	1.72243	0.6012	0.0431	0.69975	0.9926	-0.02509	-0.02919	1	-0.10915	-1.72285	0.60086	-0.08205	-0.95663	0.96285	0.0895	1.15012	0.91207	0.00583	0.14903	1	-0.06236	-0.57427	0.9975	-0.14642	-2.255	0.26778	0.17156	2.02594	0.39925	0.08788	1.06871	0.93699	0.0197	0.38908	0.99973	-0.06437	-1.18924	0.89822	-0.08367
ENST00000228641	5.40861	7e-05	0.00225	-0.38817	-3.60539	0.00581	-0.39484	-3.53032	0.00762	-0.49731	-4.66922	6e-05	-0.42621	-3.84363	0.00235	-0.49076	-4.71224	5e-05	-0.24525	-2.2374	0.27552	-0.00667	-0.14502	1	-0.10914	-1.09241	0.93055	-0.03804	-0.34132	0.99987	-0.10258	-1.20921	0.89088	0.14292	1.23497	0.8806	-0.10247	-0.88117	0.97542	-0.03137	-0.18003	1	-0.09591	-0.99481	0.95527	0.14959	1.30347	0.85061	0.0711
ENST00000228644	5.05625	0.00014	0.00396	-0.53466	-3.7693	0.00482	-0.40812	-2.58631	0.14055	-0.62577	-4.52518	0.00029	-0.28596	-1.9118	0.47777	-0.22124	-1.13939	0.91436	-0.13895	-0.99749	0.9535	0.12654	0.94208	0.96484	-0.09111	-0.79354	0.98524	0.2487	1.71604	0.60696	0.31342	2.48774	0.17314	0.39571	2.61744	0.13014	-0.21765	-1.67026	0.63699	0.12216	0.70288	0.99217	0.18688	1.42795	0.78566	0.26917	1.55443	0.71124	0.33981
ENST00000228682	2.39066	0.03329	0.21009	0.5102	1.93386	0.46982	-0.09871	-0.36899	0.99978	0.21874	0.69632	0.99222	0.88674	2.94505	0.0747	0.44905	1.68198	0.63099	0.41276	1.404	0.79704	-0.60891	-2.16958	0.33189	-0.29147	-1.20476	0.88835	0.37653	1.07034	0.93228	-0.06115	-0.1767	1	-0.09744	-0.45819	0.99922	0.31744	1.00996	0.94933	0.98545	3.11611	0.04947	0.54776	1.92645	0.47345	0.51147	1.66982	0.6387	0.668
ENST00000228705	8.34938	0	2e-05	0.67274	4.12818	0.00144	0.10515	0.83404	0.98089	0.62114	3.87676	0.00346	0.82811	4.60735	0.00028	0.08205	0.48952	0.99895	0.08641	-0.11505	1	-0.56759	-3.01323	0.04983	-0.0516	-0.18615	1	0.15537	0.63371	0.99544	-0.59069	-3.46356	0.01343	-0.58633	-4.05537	0.00184	0.51598	2.79246	0.08761	0.72295	3.51203	0.01226	-0.0231	-0.34512	0.99986	-0.01874	-0.90465	0.97121	0.20697
ENST00000228740	1.9179	0.08455	0.35148	-0.06292	-0.83319	0.98147	-0.13228	-1.88672	0.4896	-0.02	-0.02304	1	-0.14484	-2.3923	0.20282	-0.1354	-1.89638	0.4831	-0.13119	-1.8696	0.50109	-0.06936	-1.09647	0.92922	0.04292	0.78961	0.98598	-0.08191	-1.57065	0.70123	-0.07248	-1.07851	0.9344	-0.06827	-1.05232	0.94148	0.11228	1.82411	0.53193	-0.01255	-0.41478	0.99961	-0.00312	0.0498	1	0.00109	0.07898	1	-0.12483
ENST00000228741	7.99796	0	3e-05	0.39378	3.63064	0.00571	0.00866	0.4105	0.99963	0.3781	3.82219	0.0028	0.56416	4.64503	9e-05	0.15781	1.42641	0.78744	-0.01845	-0.35133	0.99985	-0.38512	-2.98494	0.04653	-0.01568	0.23248	0.99999	0.17038	1.1695	0.90519	-0.23597	-2.06997	0.37221	-0.41223	-3.84431	0.00256	0.36944	3.16606	0.02713	0.5555	3.97485	0.00159	0.14915	0.93754	0.96634	-0.02711	-0.72407	0.99111	0.18606
ENST00000228799	0.25602	0.95589	0.9882	-0.19733	-0.5502	0.99796	-0.16767	-0.59254	0.99692	-0.26776	-0.6108	0.99636	-0.04993	-0.24705	0.99998	0.04956	0.13671	1	-0.41654	-0.88323	0.97448	0.02966	-0.07529	1	-0.07043	-0.06437	1	0.1474	0.28281	0.99996	0.24689	0.66101	0.99438	-0.21921	-0.3404	0.99987	-0.10009	0.01427	1	0.11774	0.33963	0.99987	0.21723	0.69652	0.99256	-0.24887	-0.24574	0.99998	0.21783
ENST00000228820	0.73832	0.61997	0.85247	0.24444	0.57628	0.99726	-0.37569	-0.09672	1	0.74611	0.80111	0.98376	-0.7053	-1.00555	0.95114	0.02746	0.07715	1	0.58557	0.68679	0.99282	-0.62012	-0.6437	0.99499	0.50167	0.24606	0.99998	-0.94974	-1.55651	0.70979	-0.21698	-0.47546	0.99907	0.34114	0.14201	1	1.1218	0.85655	0.97732	-0.32961	-0.858	0.97757	0.40315	0.16608	1	0.96126	0.74795	0.98877	-1.45141
ENST00000228825	1.21775	0.30323	0.64705	0.12871	1.59208	0.68753	0.00831	0.37573	0.99978	0.14575	1.4034	0.80005	0.08054	1.05264	0.94129	0.05759	0.87021	0.97683	0.19362	2.39525	0.20208	-0.12039	-1.1067	0.92606	0.01705	-0.15978	1	-0.04816	-0.48095	0.99908	-0.07112	-0.66575	0.99435	0.06491	0.84485	0.98006	0.13744	0.93683	0.96647	0.07223	0.61968	0.99618	0.04927	0.44818	0.99939	0.1853	1.875	0.49776	-0.06521
ENST00000228827	0.90894	0.49165	0.78412	-0.29816	-1.75448	0.57939	-0.04887	0.05764	1	-0.20127	-1.25006	0.87409	-0.04052	-0.38379	0.99975	-0.19862	-0.95247	0.96367	-0.19319	-1.2529	0.87291	0.24929	1.68872	0.62386	0.09689	0.47368	0.99916	0.25765	1.29477	0.85438	0.09954	0.74673	0.98954	0.10498	0.44778	0.99939	-0.1524	-1.22067	0.88614	0.00836	-0.41469	0.99961	-0.14975	-0.94543	0.96497	-0.14431	-1.22705	0.8836	0.16075
ENST00000228837	2.26591	0.04277	0.24297	0.38566	1.63803	0.65848	0.99268	3.45079	0.0171	0.2109	0.84879	0.97875	0.43023	1.38119	0.8098	0.44396	1.91726	0.47576	0.50067	2.06702	0.38295	0.60702	1.94606	0.4601	-0.17476	-0.75448	0.98834	0.04457	-0.1993	0.99999	0.0583	0.3461	0.99985	0.115	0.49504	0.99884	-0.78178	-2.61098	0.14255	-0.56245	-2.07938	0.37992	-0.54872	-1.55979	0.70774	-0.49202	-1.43046	0.78305	0.21933
ENST00000228841	7.34519	0	0.0001	0.39421	2.7071	0.0964	-0.01187	-0.30677	0.99993	0.90705	5.56217	0	0.25607	1.83042	0.52727	0.30414	1.6936	0.62038	0.12523	0.36094	0.99983	-0.40608	-2.80529	0.07448	0.51285	2.90635	0.05636	-0.13814	-0.77708	0.98716	-0.09007	-0.90478	0.97194	-0.26898	-2.23829	0.2749	0.91892	5.46962	0	0.26794	1.99024	0.42081	0.31601	1.85892	0.50792	0.13709	0.6297	0.99586	-0.65098
ENST00000228850	0.61958	0.71422	0.89604	-0.31769	-0.63049	0.99486	-0.56716	-1.04621	0.93689	-0.20286	-0.22373	0.99999	0.49891	0.90898	0.9647	0.11085	-0.20777	0.99999	0.1828	0.31122	0.9999	-0.24947	-0.45437	0.99919	0.11483	0.3996	0.9996	0.8166	1.51988	0.72986	0.42854	0.38517	0.99967	0.50049	0.91148	0.96616	0.3643	0.82448	0.97976	1.06607	1.87456	0.52293	0.67801	0.79109	0.98332	0.74996	1.29766	0.84536	0.70178
ENST00000228862	0.33122	0.91926	0.97513	0.20097	0.14136	1	-0.25833	-0.38344	0.99962	-0.42731	-0.25127	0.99997	0.27768	0.50221	0.99808	0.30473	1.14524	0.89883	0.09269	0.15686	1	-0.4593	-0.51666	0.99786	-0.62827	-0.39185	0.99955	0.07671	0.36532	0.99966	0.10376	1.01797	0.93624	-0.10827	0.02346	1	-0.16898	0.14469	1	0.53601	0.84853	0.97209	0.56306	1.43359	0.77428	0.35103	0.51518	0.99801	0.70499
ENST00000228865	5.10782	0.00012	0.00365	-0.08791	-1.16488	0.90698	0.13365	1.75334	0.58032	-0.17593	-2.24139	0.27501	-0.07146	-0.74847	0.98938	0.14793	2.0996	0.35426	0.12209	1.39955	0.80209	0.22155	2.81278	0.0749	-0.08802	-1.07515	0.93522	0.01644	0.37597	0.99978	0.23584	3.19094	0.02505	0.20999	2.50522	0.15926	-0.30958	-3.78358	0.00324	-0.20511	-2.38491	0.20713	0.01428	0.26317	0.99997	-0.01156	-0.39209	0.99972	0.10447
ENST00000228872	3.76838	0.00192	0.03024	-0.26478	-3.31024	0.01641	-0.03152	-0.3772	0.99978	-0.19385	-2.34566	0.22268	-0.28454	-3.44717	0.01031	-0.09339	-0.97241	0.95991	-0.05048	-0.8736	0.97646	0.23326	2.70035	0.09846	0.07093	0.91386	0.97047	-0.01976	-0.22964	0.99999	0.17139	2.21333	0.28845	0.2143	2.3186	0.23524	-0.16233	-1.81252	0.53959	-0.25302	-2.84751	0.06675	-0.06187	-0.54408	0.99816	-0.01896	-0.45144	0.99936	-0.09069
ENST00000228918	2.88344	0.01212	0.11102	0.13173	0.50236	0.99881	0.31521	1.30617	0.84858	0.0633	0.12587	1	0.00421	0.05811	1	0.61423	3.3574	0.01598	0.39136	1.84524	0.51884	0.18348	0.831	0.98148	-0.06843	-0.36511	0.99981	-0.12752	-0.42331	0.99955	0.4825	2.84108	0.07245	0.25962	1.3444	0.83016	-0.25191	-1.16218	0.90744	-0.311	-1.20484	0.89171	0.29902	1.86687	0.50481	0.07615	0.44901	0.99937	-0.05909
ENST00000228928	6.03991	2e-05	0.00078	0.50577	4.56984	0.00015	0.28358	2.22757	0.2841	0.37633	3.45047	0.01139	0.50406	4.02416	0.00148	0.37195	3.2408	0.02232	0.14676	0.58161	0.9973	-0.22219	-2.00513	0.41422	-0.12944	-1.05292	0.9408	-0.00171	-0.35357	0.99984	-0.13382	-1.1528	0.91073	-0.35901	-3.78659	0.00355	0.09275	0.99289	0.95519	0.22047	1.60212	0.68113	0.08837	0.85929	0.97808	-0.13682	-1.60021	0.68233	0.12773
ENST00000228938	0.34501	0.91139	0.97263	0.74776	0.78996	0.98549	-0.24949	0.0511	1	0.63092	0.57358	0.99743	0.55487	0.93571	0.96586	-0.0779	0.05452	1	0.37506	0.87203	0.97608	-0.99725	-0.71229	0.99162	-0.11684	-0.20422	0.99999	-0.1929	0.14979	1	-0.82566	-0.71806	0.99125	-0.3727	0.08406	1	0.88041	0.50374	0.99877	0.80435	0.85432	0.97837	0.17158	0.0027	1	0.62454	0.79223	0.9854	-0.07606
ENST00000228945	2.45967	0.02878	0.1929	1.41836	3.33725	0.01599	0.58352	1.31072	0.84695	0.82194	1.90912	0.47502	0.86953	2.08018	0.36609	0.31409	0.8068	0.9843	0.27534	0.51478	0.99865	-0.83484	-1.85262	0.51331	-0.59642	-1.4157	0.79315	-0.54883	-1.17953	0.90147	-1.10427	-2.45686	0.17817	-1.14302	-2.73263	0.09287	0.23842	0.49298	0.99894	0.28601	0.68763	0.99325	-0.26943	-0.52257	0.99853	-0.30818	-0.79046	0.98587	0.0476
ENST00000229002	0.55262	0.76695	0.919	0.24629	0.84872	0.97643	0.63021	1.1503	0.9037	0.17394	0.7835	0.98426	0.1845	0.27157	0.99996	0.72111	1.65513	0.65118	0.76078	1.13915	0.90742	0.38393	0.37041	0.99973	-0.07235	-0.05375	1	-0.06178	-0.54698	0.9976	0.47482	0.85024	0.97547	0.51449	0.34501	0.99982	-0.45627	-0.4155	0.99948	-0.44571	-0.86483	0.97315	0.0909	0.43509	0.99931	0.13057	-0.02983	1	0.01056
ENST00000229179	0.91461	0.48791	0.78143	0.01103	0.43608	0.99947	-0.12224	-0.42056	0.99957	-0.13349	-0.33702	0.99988	0.52767	1.56524	0.70461	-0.08706	-0.25474	0.99998	-0.15339	-0.36877	0.9998	-0.13328	-0.82839	0.98192	-0.14452	-0.764	0.98814	0.51664	1.15668	0.9095	-0.09809	-0.6746	0.99391	-0.16442	-0.79304	0.98558	-0.01125	0.09849	1	0.64991	1.8743	0.49904	0.03519	0.16781	1	-0.03114	0.06432	1	0.66116
ENST00000229195	0.6561	0.68513	0.88309	-0.71474	-1.41175	0.79548	-0.52231	-0.9576	0.96264	-0.37991	-0.32302	0.99991	-0.34963	-0.14441	1	-0.34229	-0.24898	0.99998	-0.61827	-1.22281	0.88523	0.19243	0.37273	0.99979	0.33483	1.08815	0.93155	0.3651	1.24063	0.87796	0.37245	1.1374	0.91637	0.09646	0.15354	1	0.1424	0.65143	0.99498	0.17268	0.80472	0.98447	0.18002	0.70637	0.99222	-0.09596	-0.21948	0.99999	0.03027
ENST00000229214	3.94316	0.00137	0.02351	-0.2851	-4.42259	0.00021	-0.18628	-2.70839	0.09683	-0.191	-2.79874	0.0765	-0.22702	-3.55143	0.00724	-0.24839	-3.59698	0.00612	-0.15247	-2.63232	0.11705	0.09882	1.41083	0.79615	0.09411	1.54601	0.71676	0.05808	0.72029	0.99139	0.03671	0.67092	0.99413	0.13263	1.62945	0.66319	-0.00472	0.05679	1	-0.04074	-0.69355	0.99297	-0.06211	-0.73745	0.99024	0.03381	0.15669	1	-0.03602
ENST00000229238	1.45377	0.20155	0.54088	-0.00169	-0.12906	1	-0.06841	-1.26358	0.86847	0.13351	1.60144	0.68147	-0.0162	-0.32273	0.99991	0.01008	-0.06221	1	-0.0232	-0.75603	0.98887	-0.06673	-1.13297	0.91799	0.1352	1.70504	0.61274	-0.01451	-0.19561	1	0.01176	0.06182	1	-0.02151	-0.62599	0.99599	0.20193	2.71299	0.09551	0.05221	0.91618	0.97008	0.07849	1.15576	0.91038	0.04522	0.51438	0.99866	-0.14971
ENST00000229239	12.1911	0	0	-0.52135	-5.01529	1e-05	-0.11182	-0.99319	0.95564	-0.62686	-6.20944	0	-0.57383	-5.37661	0	-0.10181	-1.13885	0.91615	-0.15317	-1.52827	0.7278	0.40954	3.63497	0.00517	-0.1055	-1.25139	0.87378	-0.05247	-0.52067	0.99857	0.41954	3.65292	0.00484	0.36818	3.30078	0.01676	-0.51504	-4.73294	5e-05	-0.46201	-4.00912	0.00119	0.01001	-0.10318	1	-0.04135	-0.46117	0.99928	0.05303
ENST00000229251	0.87064	0.51913	0.79976	-0.30888	-1.72967	0.59606	-0.27979	-1.28143	0.86061	-0.08031	-0.12178	1	-0.2555	-1.40782	0.79781	-0.1657	-0.64299	0.99535	-0.14621	-0.58937	0.99713	0.02909	0.34614	0.99986	0.22857	1.5714	0.70076	0.05337	0.26675	0.99997	0.14317	1.03186	0.94671	0.16267	1.08994	0.93122	0.19948	1.1425	0.91486	0.02429	-0.08451	1	0.11409	0.63764	0.99556	0.13358	0.69145	0.9931	-0.1752
ENST00000229266	1.19989	0.31231	0.65464	0.06343	0.39124	0.99971	-0.14507	-1.30572	0.84788	-0.26955	-1.48012	0.75597	0.05071	0.20036	0.99999	-0.18092	-1.28782	0.85621	-0.04452	-0.7134	0.99154	-0.2085	-1.65114	0.64971	-0.33297	-1.83836	0.52568	-0.01271	-0.17743	1	-0.24434	-1.64335	0.65473	-0.10795	-1.08	0.93264	-0.12447	-0.07973	1	0.19579	1.44258	0.77726	-0.03584	0.06321	1	0.10055	0.59662	0.9968	0.32026
ENST00000229268	1.54886	0.16982	0.49954	-0.523	-1.73848	0.59027	-0.35197	-1.23824	0.87901	-0.17554	-0.46557	0.99924	-0.55115	-1.78334	0.5598	-0.38182	-1.27882	0.86162	-0.69429	-2.67074	0.10705	0.17103	0.38355	0.99975	0.34747	1.2341	0.88072	-0.02814	-0.09515	1	0.14118	0.40079	0.99968	-0.17129	-0.99323	0.9555	0.17643	0.77884	0.98693	-0.19918	-0.46227	0.99927	-0.02985	0.00298	1	-0.34232	-1.29784	0.85303	-0.37561
ENST00000229270	0.43813	0.85183	0.95134	-0.64976	-0.63814	0.99555	-0.14364	-0.12435	1	-1.21418	-1.40202	0.80101	-0.67112	-0.90468	0.97194	-0.6575	-0.54685	0.99811	-0.78186	-0.82285	0.98268	0.50612	0.46247	0.99927	-0.56442	-0.77416	0.9874	-0.02137	-0.29598	0.99995	-0.00775	0.07485	1	-0.1321	-0.20576	0.99999	-1.07054	-1.15941	0.90917	-0.52749	-0.71576	0.99169	-0.51387	-0.38316	0.99975	-0.63822	-0.63976	0.99548	0.54306
ENST00000229277	1.24123	0.2913	0.63667	-0.14604	-0.0885	1	1.32792	1.72364	0.61371	-0.51635	-0.40887	0.99957	0.75321	0.47874	0.99884	0.63048	0.8087	0.98133	-1.30781	-1.04555	0.93942	1.47396	1.7983	0.57058	-0.37031	-0.31795	0.9999	0.89924	0.56099	0.99721	0.77651	0.88895	0.97022	-1.16177	-0.95328	0.9606	-1.84427	-2.09393	0.40563	-0.57472	-1.22105	0.87252	-0.69745	-0.89834	0.9662	-2.63573	-2.6592	0.1766	1.26955
ENST00000229281	1.07747	0.38088	0.70997	0.13061	1.52074	0.73232	-0.04576	-0.02332	1	0.10958	0.94649	0.96475	0.18136	1.66232	0.64154	0.23793	1.79666	0.55074	0.10076	0.96147	0.96195	-0.17637	-1.43882	0.78051	-0.02103	-0.5411	0.99821	0.05075	0.19728	1	0.10732	0.33294	0.99989	-0.02985	-0.50555	0.99878	0.15534	0.90224	0.9722	0.22712	1.5761	0.69775	0.2837	1.70039	0.61603	0.14652	0.92192	0.96905	0.07178
ENST00000229314	1.52339	0.17609	0.50828	-0.60964	-1.50869	0.73916	-0.66983	-1.8948	0.48742	0.15214	-0.13173	1	-0.74259	-2.05003	0.38911	-0.51389	-1.40006	0.8009	0.28194	-0.11376	1	-0.06018	-0.4731	0.99914	0.76178	1.31949	0.84148	-0.13295	-0.5862	0.99713	0.09575	0.05176	1	0.89159	1.29508	0.85291	0.82196	1.70347	0.61509	-0.07276	-0.09157	1	0.15594	0.50423	0.99877	0.95177	1.67197	0.6359	-0.89472
ENST00000229328	2.1571	0.05301	0.27432	1.02638	2.73481	0.1006	0.3264	1.1715	0.90356	0.69704	2.19694	0.30523	0.88694	2.4818	0.17747	0.13835	0.39809	0.99968	0.61112	1.40073	0.80055	-0.69998	-1.40577	0.79737	-0.32934	-0.54144	0.99811	-0.13944	-0.19258	1	-0.88803	-2.23191	0.28847	-0.41526	-1.23382	0.879	0.37064	0.89197	0.97304	0.56054	1.19595	0.89396	-0.18805	-0.75372	0.98872	0.28472	0.18993	1	0.1899
ENST00000229329	0.54325	0.77418	0.9215	-0.04803	-0.51072	0.99871	-0.1257	-1.10058	0.92796	-0.06292	-0.86443	0.97761	0.05999	0.10299	1	-0.16296	-1.22848	0.88304	-0.09286	-0.94068	0.96583	-0.07766	-0.61438	0.99637	-0.01488	-0.35625	0.99984	0.10803	0.58933	0.99711	-0.11493	-0.72355	0.99116	-0.04483	-0.43918	0.99946	0.06278	0.27014	0.99997	0.18569	1.15164	0.91162	-0.03726	-0.08348	1	0.03283	0.1861	1	0.12291
ENST00000229330	0.78586	0.58287	0.83345	-0.30934	-1.21741	0.88694	0.16146	0.61664	0.99623	-0.16128	-0.70699	0.99209	-0.22429	-0.83538	0.98099	-0.0019	0.22652	0.99999	0.00908	-0.15403	1	0.47081	1.73636	0.59238	0.14806	0.48536	0.99902	0.08505	0.34117	0.99987	0.30744	1.39569	0.80382	0.31842	1.01915	0.9493	-0.32275	-1.25916	0.86961	-0.38575	-1.37256	0.81583	-0.16336	-0.38644	0.99974	-0.15238	-0.74134	0.9898	-0.06301
ENST00000229340	1.909	0.08612	0.35457	0.14717	2.14726	0.32618	0.04856	0.93791	0.9663	0.09522	1.66936	0.63683	0.20733	2.97888	0.04715	0.14401	2.30201	0.24433	0.09619	1.35099	0.82739	-0.09862	-1.06623	0.93769	-0.05195	-0.44625	0.9994	0.06015	0.89604	0.97311	-0.00317	0.21669	0.99999	-0.05098	-0.72662	0.99095	0.04666	0.63261	0.99573	0.15877	1.88056	0.49409	0.09545	1.24179	0.87754	0.04763	0.35489	0.99984	0.11211
ENST00000229379	8.64717	0	1e-05	0.51376	4.80232	4e-05	0.04236	1.00855	0.95204	0.53586	4.76272	5e-05	0.62035	5.2922	0	0.41064	4.02106	0.00128	0.19639	2.25556	0.26762	-0.4714	-3.50364	0.00899	0.0221	0.03599	1	0.10659	0.67783	0.99374	-0.10312	-0.64593	0.9952	-0.31737	-2.4173	0.19342	0.4935	3.48255	0.00968	0.57799	4.0256	0.0013	0.36828	2.80185	0.07697	0.15403	1.1377	0.91624	0.08449
ENST00000229390	3.42294	0.00401	0.05148	0.30526	2.75397	0.08783	-0.01801	-0.14724	1	0.30119	2.88515	0.06198	0.31835	2.88701	0.06191	0.18433	1.8168	0.53729	0.0917	0.87362	0.97632	-0.32328	-2.70635	0.09915	-0.00407	0.15896	1	0.01308	0.22502	0.99999	-0.12094	-0.84919	0.97947	-0.21357	-1.79044	0.55525	0.3192	2.82599	0.07274	0.33636	2.83635	0.07098	0.20234	1.83341	0.52605	0.10971	0.95597	0.96292	0.01716
ENST00000229395	0.43981	0.85093	0.95108	-0.33094	-1.20026	0.89137	-0.06927	-0.16501	1	0.10118	0.11363	1	-0.03347	-0.27205	0.99996	-0.08053	-0.48982	0.9989	0.08918	0.20189	0.99999	0.26168	0.952	0.9621	0.43213	1.28541	0.85581	0.29748	0.88952	0.97273	0.25041	0.65572	0.99447	0.42012	1.35013	0.82536	0.17045	0.26782	0.99997	0.0358	-0.09403	1	-0.01126	-0.30011	0.99994	0.15844	0.34826	0.99985	-0.13465
ENST00000229405	2.65015	0.01964	0.1521	-0.06344	-0.34542	0.99986	0.3949	2.1385	0.33943	-0.1201	-0.91713	0.96912	-0.15661	-0.94039	0.96501	0.28343	1.62156	0.66884	0.12573	0.70845	0.99184	0.45835	2.42651	0.20003	-0.05666	-0.56542	0.99762	-0.09316	-0.59481	0.99684	0.34687	1.92437	0.46955	0.18917	1.02789	0.94642	-0.515	-2.9256	0.06314	-0.55151	-2.9242	0.06383	-0.11147	-0.54417	0.99806	-0.26918	-1.40235	0.7992	-0.0365
ENST00000229554	1.60282	0.15335	0.47515	0.15344	0.59226	0.99606	-0.71026	-1.49991	0.74169	-0.93299	-2.05945	0.4116	-0.14295	-0.69262	0.99102	-0.3915	-1.06713	0.93011	-0.82275	-1.81374	0.55381	-0.86369	-2.0623	0.4133	-1.08642	-2.64502	0.17063	-0.29638	-1.26685	0.85552	-0.54493	-1.63659	0.66272	-0.97619	-2.39366	0.25413	-0.22273	-0.45523	0.9992	0.56731	0.79541	0.98254	0.31876	0.43263	0.99939	-0.1125	-0.25118	0.99997	0.79004
ENST00000229563	1.08442	0.37665	0.70616	0.13281	1.42344	0.78922	0.03453	0.35916	0.99983	0.14073	1.58657	0.69106	0.0762	0.55143	0.99802	0.185	1.90535	0.47697	0.05302	0.22772	0.99999	-0.09827	-0.96499	0.96134	0.00792	0.18035	1	-0.05661	-0.81641	0.98333	0.05219	0.52565	0.99849	-0.07979	-1.1404	0.91553	0.10619	1.12099	0.92179	0.04166	0.16783	1	0.15047	1.43026	0.78542	0.01849	-0.134	1	-0.06453
ENST00000229570	0.59655	0.7326	0.9042	-0.37103	-0.64947	0.99496	-0.22251	-0.12775	1	0.19597	0.84045	0.98016	0.12871	0.70971	0.99179	-0.23249	-0.20224	0.99999	-0.27055	-0.44627	0.99939	0.14852	0.48114	0.99906	0.567	1.47266	0.76048	0.49974	1.32882	0.83719	0.13854	0.42678	0.99953	0.10048	0.1848	1	0.41849	0.91873	0.969	0.35122	0.79416	0.98517	-0.00998	-0.06627	1	-0.04803	-0.2955	0.99994	-0.06726
ENST00000229595	1.75132	0.11637	0.41425	-0.20862	-2.62035	0.12206	-0.13998	-1.66016	0.64302	-0.14581	-1.82023	0.53496	-0.13322	-1.76501	0.57249	-0.06562	-0.9984	0.95426	-0.1891	-2.71878	0.09556	0.06864	0.78676	0.98619	0.06281	0.75233	0.98908	0.0754	0.75766	0.98866	0.143	1.51829	0.73379	0.01952	-0.17422	1	-0.00583	-0.0692	1	0.00677	-0.04987	1	0.07437	0.66541	0.99436	-0.04912	-0.93019	0.9676	0.0126
ENST00000229633	3.0395	0.00882	0.08947	-0.30105	-3.53154	0.00761	-0.10055	-1.16925	0.90571	-0.28558	-3.41998	0.01126	-0.23369	-2.67344	0.10524	-0.19773	-2.36573	0.21346	-0.17553	-2.19781	0.29671	0.2005	2.12214	0.33957	0.01547	0.06431	1	0.06736	0.74519	0.9897	0.10332	1.04279	0.94403	0.12552	1.2246	0.88479	-0.18503	-2.03585	0.39196	-0.13314	-1.36526	0.82035	-0.09718	-1.08105	0.9338	-0.07498	-0.92019	0.96946	0.05189
ENST00000229634	1.39976	0.22107	0.56421	0.37441	0.9509	0.95616	0.99002	2.01175	0.46733	0.82882	1.38999	0.79671	0.39415	0.90334	0.96498	1.2227	3.08638	0.11476	1.21883	2.28172	0.3455	0.61561	1.10791	0.90917	0.45442	0.44942	0.99902	0.01974	-0.03056	1	0.8483	2.15715	0.4012	0.84442	1.35369	0.81099	-0.1612	-0.66785	0.99098	-0.59587	-1.12012	0.90487	0.23269	0.98097	0.9436	0.22881	0.21027	0.99999	-0.43468
ENST00000229769	0.49808	0.80852	0.93559	0.36278	0.45574	0.99931	0.61773	0.99483	0.95466	1.46374	1.55292	0.71222	0.53252	0.63945	0.99539	0.14859	0.28357	0.99996	0.77552	0.69545	0.99274	0.25495	0.55885	0.99781	1.10096	1.10263	0.92627	0.16974	0.19597	1	-0.21419	-0.15756	1	0.41274	0.25937	0.99997	0.84601	0.5155	0.99859	-0.08522	-0.35763	0.99983	-0.46915	-0.69583	0.99271	0.15779	-0.29044	0.99995	-0.93122
ENST00000229794	0.24272	0.96121	0.99004	-0.18426	-0.60909	0.99654	0.10272	0.41797	0.99959	-0.01692	0.23327	0.99999	0.00828	0.2016	0.99999	-0.05963	-0.10851	1	0.08472	0.35062	0.99985	0.28697	0.97755	0.95877	0.16734	0.82834	0.98201	0.19254	0.78542	0.98635	0.12463	0.47698	0.99913	0.26897	0.9338	0.96706	-0.11964	-0.19533	1	-0.09444	-0.21709	0.99999	-0.16235	-0.5046	0.9988	-0.018	-0.07808	1	0.0252
ENST00000229795	2.28168	0.04109	0.2377	0.17741	0.33934	0.99987	-0.41624	-1.54465	0.71743	0.51538	1.82137	0.53606	0.49902	1.53205	0.72504	0.01755	0.03437	1	-0.04047	0.38198	0.99975	-0.59365	-1.83621	0.52548	0.33797	1.46181	0.76666	0.32161	1.18643	0.89798	-0.15986	-0.29304	0.99995	-0.21788	0.04353	1	0.93162	3.21605	0.02589	0.91525	2.91262	0.06168	0.43379	1.51973	0.73273	0.37577	1.8696	0.50279	-0.01636
ENST00000229812	4.89092	0.00019	0.00519	0.20064	2.76771	0.08385	-0.00648	-0.12339	1	0.00954	0.54586	0.99812	0.24384	3.33297	0.01581	0.00861	0.46112	0.99928	-0.08798	-1.11593	0.92328	-0.20713	-2.69244	0.1017	-0.1911	-2.16067	0.31861	0.0432	0.65786	0.9947	-0.19203	-2.19967	0.29692	-0.28862	-3.77282	0.00329	0.01603	0.62613	0.99597	0.25033	3.227	0.02227	0.0151	0.54708	0.9981	-0.08149	-0.91972	0.96943	0.2343
ENST00000229829	1.50868	0.18265	0.51713	0.03381	0.57463	0.99737	0.42386	2.35303	0.2331	0.02492	0.62216	0.99593	0.02848	0.82941	0.98118	0.25575	2.1117	0.35535	0.06122	0.4002	0.99967	0.39005	1.79492	0.55583	-0.00889	0.04556	1	-0.00533	0.26102	0.99997	0.22194	1.53025	0.72589	0.02741	-0.15526	1	-0.39894	-1.75036	0.58506	-0.39538	-1.52276	0.73034	-0.16811	-0.31208	0.99992	-0.36264	-1.89811	0.48787	0.00356
ENST00000229854	2.12917	0.05575	0.28209	0.75032	2.1212	0.39275	-0.03879	-0.39271	0.99964	1.61818	2.33687	0.31909	1.38675	2.86658	0.15319	1.71397	2.12585	0.40784	1.45433	1.40903	0.78682	-0.78911	-2.37085	0.27729	0.86785	0.21138	0.99999	0.63643	0.74887	0.98447	0.96365	0.09716	1	0.70401	-0.59226	0.99543	1.65697	2.56881	0.23191	1.42554	3.06527	0.11014	1.75277	2.36086	0.30172	1.49312	1.69755	0.63083	-0.23143
ENST00000229866	2.25075	0.04372	0.24596	-0.39067	-1.18117	0.89028	-0.61667	-0.6951	0.99091	1.1681	1.52081	0.72869	0.58824	0.53678	0.9974	0.25221	-0.12972	1	-1.56182	-2.35291	0.26927	-0.226	0.41991	0.99945	1.55877	2.74446	0.20301	0.9789	1.69972	0.63	0.64287	0.98779	0.94862	-1.17116	-1.15154	0.90502	1.78477	2.1434	0.40727	1.20491	1.19211	0.88391	0.86887	0.537	0.99772	-0.94515	-1.51163	0.73551	-0.57986
ENST00000229903	0.4231	0.86214	0.95496	-0.0313	0.01342	1	-0.00357	0.4177	0.99958	0.05744	0.41165	0.99962	-0.02151	0.22298	0.99999	0.01353	0.86408	0.97732	0.10296	1.27839	0.86097	0.02773	0.40098	0.99967	0.08874	0.39232	0.99971	0.00979	0.20735	0.99999	0.04483	0.84014	0.98032	0.13425	1.25361	0.87171	0.06101	-0.02528	1	-0.01794	-0.19431	1	0.0171	0.39827	0.99968	0.10652	0.78866	0.98579	-0.07895
ENST00000229922	2.37433	0.03427	0.21358	-0.28419	-1.71946	0.60292	0.24024	1.24282	0.87735	-0.22422	-1.55445	0.71149	-0.26861	-1.84129	0.51995	0.01523	0.03879	1	-0.0434	-0.4447	0.99942	0.52443	2.81802	0.07214	0.05997	0.1367	1	0.01559	-0.17331	1	0.29943	1.68511	0.62612	0.24079	1.21397	0.88902	-0.46446	-2.65376	0.1105	-0.50885	-2.90685	0.05645	-0.22501	-1.16375	0.90765	-0.28364	-1.61733	0.67112	-0.04438
ENST00000229971	0.70562	0.64573	0.86446	-0.92547	-0.74265	0.98905	0.40899	0.63431	0.99514	-0.32971	-0.46522	0.99916	-0.19918	0.26281	0.99997	-1.12798	-1.08934	0.9286	-0.10804	0.22619	0.99999	1.33447	1.32464	0.83639	0.59576	0.25779	0.99997	0.72629	0.99952	0.9516	-0.2025	-0.37895	0.99975	0.81744	0.94545	0.963	-0.7387	-1.05582	0.9369	-0.60817	-0.38407	0.99971	-1.53697	-1.62686	0.66618	-0.51703	-0.40657	0.9996	0.13053
ENST00000230036	1.45602	0.20052	0.53979	0.22795	0.79704	0.98435	-0.02562	0.01502	1	0.51293	1.54379	0.71746	0.1406	0.62901	0.99554	-0.19876	-0.37839	0.99975	-0.28728	-1.21548	0.88582	-0.25357	-0.72729	0.99029	0.28499	0.75361	0.98817	-0.08735	-0.14414	1	-0.42671	-1.13866	0.91339	-0.51523	-1.96573	0.44632	0.53855	1.42684	0.78495	0.16622	0.57263	0.99734	-0.17314	-0.36691	0.99979	-0.26166	-1.14829	0.91042	-0.37233
ENST00000230048	0.85274	0.53241	0.80755	0.00765	-0.0346	1	-0.06224	-1.14118	0.91518	0.0642	0.56845	0.99764	-0.01771	-0.3892	0.99973	0.04044	0.47633	0.99913	-0.02591	-1.06023	0.93938	-0.06989	-1.0975	0.92889	0.05655	0.59304	0.99701	-0.02536	-0.35114	0.99985	0.0328	0.50314	0.99882	-0.03356	-1.01741	0.95006	0.12644	1.6357	0.65912	0.04453	0.7334	0.9905	0.10268	1.53556	0.72323	0.03632	0.10963	1	-0.08191
ENST00000230050	0.55222	0.76723	0.91912	-0.02886	-0.42327	0.99956	-0.12863	-1.39647	0.804	-0.05633	-1.00669	0.95266	-0.00978	-0.10587	1	-0.06111	-0.72918	0.99083	-0.0676	-1.134	0.91772	-0.09977	-0.99197	0.95589	-0.02748	-0.58122	0.99734	0.01908	0.30055	0.99994	-0.03225	-0.31623	0.99992	-0.03874	-0.72019	0.99142	0.07229	0.43025	0.99952	0.11885	1.24573	0.87615	0.06751	0.66388	0.99447	0.06103	0.28496	0.99996	0.04656
ENST00000230056	0.75845	0.60417	0.84411	0.29642	0.78734	0.98525	-0.1762	-0.80766	0.98333	0.0225	-0.08246	1	-0.11083	-0.61312	0.99614	-0.11359	-0.53413	0.99822	-0.17809	-1.13018	0.91642	-0.47262	-1.53548	0.72251	-0.27393	-0.85238	0.97786	-0.40725	-1.37122	0.81429	-0.41001	-1.28397	0.8564	-0.47452	-1.87662	0.50349	0.1987	0.71527	0.99115	0.06537	0.21377	0.99999	0.06261	0.27768	0.99996	-0.00189	-0.27843	0.99996	-0.13332
ENST00000230085	1.01225	0.42062	0.73801	-0.31565	-1.41496	0.79392	-0.08736	-0.42785	0.99953	-0.17721	-1.01671	0.95032	-0.40741	-1.98524	0.42432	-0.00748	-0.06049	1	-0.09642	-0.68345	0.99352	0.22829	0.88804	0.97442	0.13844	0.36883	0.9998	-0.09176	-0.61102	0.99649	0.30817	1.29507	0.85444	0.21923	0.681	0.99364	-0.08985	-0.52835	0.99844	-0.32005	-1.43456	0.78305	0.07988	0.35574	0.99984	-0.00906	-0.22442	0.99999	-0.2302
ENST00000230122	1.46381	0.19627	0.53494	-0.18075	-0.26235	0.99997	0.43487	0.77739	0.98625	0.76617	1.48384	0.75287	0.18935	0.33523	0.99988	0.10916	0.21516	0.99999	-0.59366	-1.34152	0.83021	0.61562	1.0197	0.94741	0.94692	1.73795	0.59447	0.3701	0.58873	0.99692	0.28991	0.46526	0.99919	-0.41292	-1.08618	0.93048	0.33131	0.62631	0.9956	-0.24551	-0.44397	0.99937	-0.3257	-0.54656	0.99796	-1.02853	-2.00041	0.42407	-0.57682
ENST00000230124	1.37691	0.23089	0.5739	-0.0561	-0.74715	0.98944	0.03207	0.10669	1	0.05432	0.50769	0.99874	0.14493	1.59058	0.68851	0.09591	1.37376	0.81551	-0.00418	-0.24213	0.99998	0.08816	0.79515	0.98534	0.11041	1.22658	0.88344	0.20103	2.28421	0.25528	0.152	2.07302	0.3712	0.05192	0.47763	0.99911	0.02225	0.36507	0.99981	0.11286	1.37579	0.81436	0.06384	1.17203	0.90421	-0.03625	-0.32784	0.9999	0.09061
ENST00000230173	3.4977	0.00317	0.04362	-0.47658	-1.44964	0.77226	0.94281	2.40449	0.22725	-0.24686	-0.5993	0.99655	0.56156	1.66939	0.63972	0.31781	1.12768	0.91609	0.3743	1.31853	0.83966	1.41939	3.70588	0.01133	0.22971	0.82876	0.98079	1.03814	3.05459	0.05665	0.79439	2.50627	0.18024	0.85088	2.69906	0.12091	-1.18968	-2.91709	0.08011	-0.38125	-0.80282	0.98287	-0.62501	-1.28649	0.85337	-0.56851	-1.1174	0.91831	0.80843
ENST00000230321	1.97923	0.07376	0.32819	1.86221	2.10286	0.39164	2.12773	2.37198	0.27648	1.34919	2.33138	0.27241	2.02366	2.45707	0.24598	1.39212	2.20241	0.33031	2.09499	3.09672	0.07727	0.26552	0.40949	0.99945	-0.51302	0.21397	0.99999	0.16145	0.36065	0.99973	-0.47009	0.15717	1	0.23278	1.02268	0.93872	-0.77854	-0.2114	0.99999	-0.10407	-0.06776	1	-0.73561	-0.25402	0.99997	-0.03273	0.56316	0.99675	0.67447
ENST00000230323	1.51379	0.18047	0.51411	-0.87361	-1.32416	0.82819	-0.06595	0.5686	0.99632	-1.23477	-2.06002	0.42785	-0.92948	-2.11399	0.40677	-1.14761	-1.76191	0.59185	-0.82841	-1.88017	0.5256	0.80766	1.80392	0.57158	-0.36116	-0.74384	0.9875	-0.05587	-0.83008	0.97756	-0.274	-0.48091	0.99882	0.0452	-0.61856	0.99521	-1.16882	-2.48523	0.24824	-0.86353	-2.52872	0.24078	-1.08166	-2.19605	0.36342	-0.76246	-2.3158	0.31427	0.30529
ENST00000230340	3.84124	0.00167	0.02733	0.15355	1.35786	0.82338	-0.0972	-1.28421	0.8587	-0.03416	-0.6178	0.9962	-0.12928	-1.59489	0.68576	0.07781	0.41743	0.99959	0.29285	2.45199	0.1823	-0.25075	-2.52854	0.15418	-0.18771	-1.92867	0.4637	-0.28282	-2.87034	0.06695	-0.07574	-0.88566	0.97441	0.1393	1.12657	0.91931	0.06304	0.67948	0.99362	-0.03207	-0.24932	0.99998	0.17501	1.61913	0.67012	0.39005	3.5204	0.00928	-0.09512
ENST00000230354	1.94628	0.0787	0.33909	0.92485	1.50019	0.74374	-0.13926	0.04873	1	1.097	1.49948	0.74407	1.67541	2.07738	0.38221	0.80058	1.01308	0.94951	-0.61266	-0.68824	0.99306	-1.06411	-1.36973	0.81584	0.17215	0.04092	1	0.75056	0.6522	0.99442	-0.12426	-0.41221	0.99959	-1.53751	-2.14551	0.33674	1.23626	1.37454	0.81322	1.81468	1.93328	0.4687	0.93985	0.91405	0.96929	-0.4734	-0.6908	0.99291	0.57841
ENST00000230361	1.43453	0.20856	0.5499	0.03204	0.5968	0.99678	-0.08544	-0.30459	0.99993	-0.18646	-1.34419	0.82948	0.19693	1.46817	0.76268	0.0098	0.28292	0.99996	-0.08506	-0.3238	0.9999	-0.11749	-0.85643	0.978	-0.2185	-1.90878	0.47932	0.16489	0.88327	0.97416	-0.02224	-0.2902	0.99995	-0.1171	-0.89553	0.97253	-0.10101	-0.94466	0.96425	0.28237	1.66215	0.64263	0.09524	0.55558	0.99784	0.00038	-0.00722	1	0.38339
ENST00000230381	4.41213	0.00052	0.01127	-0.23451	-2.30558	0.24309	-0.00802	-0.5541	0.99795	-0.43591	-4.61234	0.0001	-0.15032	-1.45368	0.772	-0.14535	-1.43665	0.78169	-0.08383	-1.03502	0.94575	0.22649	1.56835	0.70267	-0.2014	-2.29243	0.24927	0.08419	0.76896	0.98775	0.08916	0.7827	0.98657	0.15068	1.18221	0.90076	-0.42789	-3.6721	0.00489	-0.1423	-0.80729	0.9842	-0.13733	-0.79173	0.98573	-0.07581	-0.4236	0.99956	0.28559
ENST00000230402	0.98756	0.43741	0.74889	-0.26647	-0.22468	0.99999	0.01567	0.62125	0.99511	-1.04007	-1.08499	0.92619	-0.65338	-0.50957	0.9984	-0.69468	-0.74216	0.98809	-1.32492	-1.70462	0.61932	0.28214	0.83254	0.97792	-0.7736	-0.85902	0.97532	-0.38691	-0.28746	0.99994	-0.42821	-0.52349	0.9982	-1.05845	-1.48392	0.75148	-1.05574	-1.64011	0.65973	-0.66904	-1.09388	0.92224	-0.71035	-1.30394	0.84259	-1.34059	-2.21443	0.32651	0.3867
ENST00000230413	0.36825	0.89754	0.96813	0.36422	1.01328	0.94928	0.36832	0.68911	0.99281	0.04945	0.10543	1	0.37532	0.79136	0.98503	0.16366	0.29294	0.99995	-0.06789	-0.14121	1	0.0041	-0.24878	0.99998	-0.31477	-0.88041	0.97428	0.0111	-0.18549	1	-0.20056	-0.67713	0.99345	-0.43211	-1.11714	0.92088	-0.31888	-0.57513	0.99732	0.00699	0.06817	1	-0.20467	-0.39114	0.9997	-0.43621	-0.79796	0.98448	0.32587
ENST00000230419	0.40522	0.87438	0.95955	-1.01889	-1.25045	0.85754	-0.04949	0.29295	0.9999	-0.51397	-0.92564	0.95671	-0.1731	-0.04615	1	-0.23795	-0.46949	0.99863	0.20527	0.22114	0.99998	0.9694	1.46265	0.75852	0.50492	0.29899	0.9999	0.8458	1.1914	0.88051	0.78095	0.70082	0.98939	1.22417	1.42372	0.77779	-0.46448	-1.1493	0.89368	-0.12361	-0.33182	0.99979	-0.18846	-0.71231	0.98747	0.25476	-0.07531	1	0.34088
ENST00000230431	1.58016	0.16032	0.48589	-0.06268	-1.0551	0.94069	0.0711	0.16352	1	0.04984	0.1113	1	-0.18144	-1.99128	0.42107	0.10187	0.60985	0.99651	-0.05033	-1.01899	0.94968	0.13378	1.12873	0.9192	0.11252	1.12904	0.9191	-0.11876	-0.95212	0.96372	0.16455	1.60371	0.68002	0.01235	0.00171	1	-0.02126	-0.05685	1	-0.25254	-1.9877	0.42344	0.03077	0.40536	0.99966	-0.12143	-1.09895	0.92842	-0.23128
ENST00000230449	2.53948	0.02475	0.17631	-0.29499	-3.3761	0.014	-0.13528	-1.72437	0.60004	-0.21648	-2.35909	0.21885	-0.30058	-3.24687	0.02137	-0.19791	-2.01809	0.40462	-0.22297	-2.45203	0.17973	0.15972	1.40679	0.7981	0.07852	0.95741	0.96263	-0.00558	0.02113	1	0.09708	1.23349	0.88083	0.07202	0.81093	0.98383	-0.0812	-0.49244	0.99894	-0.1653	-1.34624	0.82958	-0.06264	-0.21082	0.99999	-0.0877	-0.61332	0.99639	-0.0841
ENST00000230461	0.39623	0.87996	0.96139	0.02569	0.48696	0.99902	0.10498	1.35925	0.82331	0.0276	0.44216	0.99943	0.00815	0.27507	0.99996	0.03967	0.96049	0.96221	0.03934	0.63218	0.99576	0.07929	0.90016	0.97257	0.00192	-0.03749	1	-0.01754	-0.19425	1	0.01398	0.48557	0.99903	0.01365	0.15978	1	-0.07737	-0.92195	0.9691	-0.09682	-1.05605	0.94051	-0.06531	-0.41805	0.99959	-0.06564	-0.7273	0.99093	-0.01945
ENST00000230480	0.78365	0.58434	0.83453	-0.68063	-1.04916	0.93086	-0.25434	-0.27996	0.99994	0.13349	0.23823	0.99997	-0.64815	-1.10635	0.91296	-1.29508	-1.46873	0.75759	-1.08319	-1.65177	0.65514	0.42629	0.69147	0.99054	0.81412	1.28175	0.84531	0.03248	-0.08144	1	-0.61445	-0.42831	0.99938	-0.40256	-0.62323	0.99502	0.38783	0.49825	0.99821	-0.39381	-0.75201	0.9853	-1.04074	-1.08153	0.92361	-0.82885	-1.26123	0.85778	-0.78164
ENST00000230538	0.50121	0.8063	0.93477	0.06837	0.30747	0.99993	0.10196	0.00213	1	0.26919	0.95597	0.9627	0.37926	0.69987	0.99249	-0.22906	-0.51923	0.99857	-0.24623	-0.2251	0.99999	0.0336	-0.27965	0.99996	0.20082	0.64255	0.99528	0.31089	0.40244	0.99966	-0.29743	-0.80723	0.98413	-0.3146	-0.51975	0.99856	0.16722	0.87857	0.97544	0.27729	0.64578	0.99514	-0.33103	-0.47693	0.99912	-0.34819	-0.20821	0.99999	0.11007
ENST00000230565	1.64582	0.14222	0.45757	-0.80236	-0.59521	0.99678	-2.10583	-1.93374	0.46344	-0.72099	0.06616	1	-1.06636	-0.58168	0.99716	-1.49191	-1.5317	0.72509	-1.68985	-1.9978	0.42296	-1.30348	-1.42253	0.78888	0.08137	0.6869	0.99304	-0.26401	0.00222	1	-0.68955	-0.99707	0.95382	-0.8875	-1.48952	0.75065	1.38484	2.0824	0.36919	1.03947	1.38696	0.80796	0.61392	0.40019	0.99968	0.41598	-0.05283	1	-0.34538
ENST00000230640	1.29085	0.26796	0.61287	-0.18198	-2.1063	0.34942	-0.05765	-0.61679	0.9963	-0.11482	-1.38989	0.80739	-0.1668	-2.11326	0.34536	-0.03234	-0.46464	0.99925	-0.1099	-1.35395	0.82601	0.12434	1.34154	0.8322	0.06716	0.67558	0.9939	0.01518	-0.07872	1	0.14964	1.55246	0.71272	0.07208	0.68271	0.99355	-0.05718	-0.68748	0.9933	-0.10915	-1.37391	0.81578	0.0253	0.15981	1	-0.05226	-0.66658	0.99433	-0.05198
ENST00000230771	0.8368	0.54381	0.81311	-0.24346	-0.46977	0.99917	-0.32331	-0.51476	0.9986	-0.51602	-1.38834	0.80705	0.0061	-0.1185	1	-0.12335	-0.2326	0.99999	0.15836	0.80043	0.98448	-0.07985	-0.06995	1	-0.27256	-0.92391	0.96808	0.24957	0.33202	0.99989	0.12011	0.22056	0.99999	0.40183	1.25537	0.87043	-0.19271	-0.80389	0.98423	0.32942	0.38287	0.99974	0.19996	0.27705	0.99996	0.48167	1.2626	0.8674	0.52213
ENST00000230792	2.18824	0.04976	0.26448	-0.36714	-3.24181	0.02188	-0.15555	-1.36726	0.81886	-0.25026	-2.33215	0.23167	-0.14782	-1.57641	0.69755	-0.27658	-2.39003	0.20563	-0.06169	-1.07881	0.93402	0.21159	1.64757	0.65141	0.11688	0.85008	0.97935	0.21932	1.53302	0.72471	0.09056	0.74306	0.98976	0.30545	2.03993	0.39116	-0.09471	-0.8276	0.98199	0.00773	-0.15567	1	-0.12103	-0.90462	0.97173	0.09386	0.31213	0.99992	0.10244
ENST00000230859	0.52788	0.78598	0.92614	0.00669	0.09391	1	0.09932	1.28643	0.85808	0.06568	0.91356	0.97036	0.00429	0.15107	1	-0.02699	-0.0782	1	-0.00378	0.04569	1	0.09263	1.1897	0.89793	0.05899	0.81152	0.98376	-0.00241	0.05967	1	-0.03368	-0.16755	1	-0.01047	-0.04519	1	-0.03364	-0.41111	0.99963	-0.09504	-1.09953	0.92812	-0.12631	-1.31371	0.84547	-0.1031	-1.20433	0.89242	-0.0614
ENST00000230882	1.01792	0.41807	0.73612	-0.18062	-1.28088	0.86083	0.19276	0.24911	0.99998	-0.24611	-1.65653	0.64528	-0.18292	-1.16613	0.90673	0.17906	0.02895	1	-0.05221	-0.62669	0.99596	0.37338	1.40712	0.79816	-0.06549	-0.38476	0.99975	-0.00229	0.07335	1	0.35969	1.22466	0.88467	0.12841	0.60203	0.99676	-0.43887	-1.74109	0.58835	-0.37567	-1.30114	0.85157	-0.01369	-0.20874	0.99999	-0.24497	-0.8123	0.98377	0.06319
ENST00000230895	4.55306	0.00039	0.00904	0.08274	0.95283	0.96344	0.30246	2.6338	0.11923	0.23485	1.95146	0.44777	0.61717	4.26004	0.00056	0.35023	2.90897	0.05852	0.43238	3.5201	0.00878	0.21972	1.73538	0.59276	0.15212	1.00388	0.9529	0.53443	3.33454	0.01688	0.2675	1.97636	0.43174	0.34964	2.58551	0.13381	-0.06761	-0.76835	0.98774	0.31471	1.48825	0.75165	0.04777	0.17561	1	0.12992	0.74318	0.98972	0.38232
ENST00000230901	1.05256	0.39504	0.72039	0.06473	-0.21273	0.99999	-0.07168	-0.23619	0.99999	-0.44959	-1.71436	0.60676	-0.3339	-1.18059	0.90121	-0.45984	-1.66711	0.6384	-0.35437	-1.39247	0.80581	-0.13641	-0.03272	1	-0.51432	-1.46179	0.76729	-0.39863	-0.94703	0.96452	-0.52457	-1.41939	0.79122	-0.41909	-1.1526	0.91112	-0.37791	-1.35852	0.82343	-0.26222	-0.87139	0.97658	-0.38816	-1.32005	0.84242	-0.28269	-1.067	0.93739	0.11569
ENST00000230914	3.03495	0.00896	0.09035	0.00516	-0.09798	1	-0.03918	-0.50549	0.99878	0.18343	2.07788	0.36727	-0.10902	-1.31858	0.8432	0.06788	0.40577	0.99965	-0.14742	-1.86732	0.50287	-0.04434	-0.41051	0.99963	0.17827	2.14587	0.3273	-0.11417	-1.21021	0.89019	0.06272	0.49455	0.99892	-0.15258	-1.75804	0.57702	0.22261	2.41873	0.19259	-0.06983	-0.73665	0.99025	0.10706	0.8607	0.97807	-0.10824	-1.2466	0.87552	-0.29245
ENST00000230990	3.28053	0.00538	0.0635	-0.56073	-3.95646	0.00162	-0.13513	-0.98241	0.95772	-0.32599	-2.00987	0.40928	-0.32179	-2.06354	0.37589	-0.12304	-0.58629	0.99719	-0.26966	-1.73267	0.59423	0.4256	2.68537	0.10341	0.23474	1.8857	0.49045	0.23893	1.76304	0.5736	0.43769	3.22249	0.0224	0.29107	2.10022	0.3534	-0.19085	-0.89829	0.9728	-0.18666	-0.96901	0.96045	0.01209	0.40402	0.99966	-0.13453	-0.66188	0.99453	0.00419
ENST00000231004	4.08866	0.0009	0.01725	-0.02041	0.04465	1	0.50298	2.15601	0.33168	0.10741	0.63773	0.99534	0.91865	2.93609	0.06615	0.85985	3.35218	0.02094	0.64195	2.68327	0.11629	0.52339	2.10129	0.36287	0.12782	0.5891	0.99698	0.93906	2.87477	0.07717	0.88027	3.28861	0.02529	0.66237	2.62275	0.13367	-0.39557	-1.53453	0.72326	0.41567	0.67632	0.99341	0.35687	1.07248	0.93383	0.13897	0.42324	0.99953	0.81124
ENST00000231061	4.09203	0.00101	0.01877	0.43961	3.14932	0.0274	0.13065	1.14151	0.91525	0.37116	2.9927	0.04405	0.69915	4.37955	0.00024	0.33523	2.63973	0.11433	0.19599	1.98267	0.42577	-0.30897	-1.79958	0.54834	-0.06845	-0.11817	1	0.25954	1.34892	0.82863	-0.10439	-0.40946	0.99964	-0.24363	-1.08298	0.93327	0.24051	1.66461	0.63985	0.5685	3.01344	0.04146	0.20458	1.36257	0.82174	0.06534	0.742	0.98993	0.32799
ENST00000231134	0.98059	0.44228	0.75202	0.0514	0.47191	0.9991	0.09074	0.53234	0.99823	0.1697	1.09735	0.92617	0.2274	1.45574	0.76884	0.40083	2.18229	0.32252	0.16061	0.95792	0.96084	0.03934	0.09288	1	0.1183	0.62859	0.99553	0.176	0.98997	0.95382	0.34943	1.72191	0.60503	0.10921	0.50193	0.99873	0.07896	0.49582	0.99881	0.13666	0.83557	0.97988	0.31009	1.5252	0.72859	0.06987	0.38063	0.99974	0.0577
ENST00000231137	1.54094	0.17215	0.50272	0.65211	2.52899	0.18306	0.35074	1.53164	0.72442	0.37922	1.60571	0.67961	0.73838	2.21425	0.31939	0.72151	2.57151	0.16756	0.41431	1.75698	0.58387	-0.30138	-0.84531	0.97779	-0.27289	-0.89251	0.97085	0.08626	-0.22346	0.99999	0.06939	0.1464	1	-0.23781	-0.68986	0.99224	0.02848	-0.00611	1	0.38764	0.60734	0.99603	0.37077	0.95287	0.96034	0.06357	0.16938	1	0.35916
ENST00000231173	4.62441	0.00034	0.00797	0.55288	3.5239	0.01381	0.26424	1.84285	0.52483	0.63951	4.01779	0.00304	0.62927	3.76413	0.00709	0.6593	4.1847	0.00176	0.42527	2.59142	0.14587	-0.28864	-1.45265	0.77072	0.08663	0.51726	0.99848	0.07639	0.3308	0.99988	0.10642	0.78824	0.9851	-0.12761	-0.78803	0.98519	0.37527	1.92987	0.47008	0.36503	1.73228	0.59822	0.39506	2.14898	0.33949	0.16103	0.66088	0.9942	-0.01024
ENST00000231198	1.14289	0.34304	0.68019	-0.34126	-0.70951	0.99175	-0.44901	-1.47881	0.75671	-0.44366	-1.12807	0.9181	0.00745	0.56761	0.99754	-0.54598	-1.52219	0.731	-0.30063	-0.41633	0.99958	-0.10775	-0.81245	0.98327	-0.10241	-0.42096	0.99956	0.34871	1.24944	0.87252	-0.20472	-0.82946	0.98143	0.04063	0.27487	0.99996	0.00534	0.4119	0.99961	0.45646	1.96326	0.44463	-0.09697	0.01436	1	0.14838	1.05138	0.94066	0.45111
ENST00000231238	2.09025	0.06037	0.29493	-0.10074	-0.71363	0.9918	-0.29322	-2.68831	0.10205	0.00184	0.10037	1	-0.11186	-1.10338	0.92716	-0.23194	-2.09191	0.35806	-0.03882	-0.6832	0.99352	-0.19248	-1.99636	0.41746	0.10258	0.79467	0.9855	-0.01113	-0.40843	0.99964	-0.1312	-1.38464	0.81016	0.06191	0.00995	1	0.29505	2.71849	0.09457	0.18135	1.55149	0.71332	0.06128	0.63544	0.99564	0.25439	1.95374	0.44505	-0.1137
ENST00000231338	1.50849	0.1823	0.51665	-0.04086	-0.32535	0.99988	-0.06344	-0.22931	0.99998	0.47714	0.52769	0.99797	0.53177	0.06342	1	1.4724	2.10444	0.41086	1.71946	2.23053	0.35474	-0.02259	0.07455	1	0.51799	0.83604	0.97711	0.57262	0.37256	0.99971	1.51325	2.39429	0.28468	1.76031	2.52128	0.24264	0.54058	0.71344	0.98981	0.59521	0.27847	0.99995	1.53584	2.18641	0.36854	1.7829	2.31841	0.31456	0.05463
ENST00000231368	0.60561	0.72541	0.90094	-0.70332	-1.31024	0.84732	-0.61122	-1.14757	0.91311	-0.68904	-1.24391	0.87678	-0.63404	-1.07219	0.93617	-0.79378	-1.5664	0.70393	-0.13414	-0.37111	0.99979	0.0921	0.0865	1	0.01429	0.05176	1	0.06928	0.20803	0.99999	-0.09045	-0.29868	0.99994	0.56919	0.88675	0.97458	-0.07781	-0.03703	1	-0.02282	0.11095	1	-0.18255	-0.36413	0.99982	0.47709	0.75461	0.98897	0.05499
ENST00000231461	7.41221	0	9e-05	0.66522	4.05943	0.00249	0.1372	0.75179	0.98863	0.66698	4.02046	0.00283	0.53678	3.17868	0.03542	0.18276	0.79092	0.98522	-0.06866	-0.80278	0.98411	-0.52802	-3.01805	0.05409	0.00176	0.02257	1	-0.12844	-0.75583	0.98804	-0.48246	-3.07732	0.04624	-0.73388	-4.68628	0.00027	0.52978	2.99475	0.0574	0.39958	2.22791	0.29665	0.04556	0.01597	1	-0.20586	-1.46656	0.76342	-0.1302
ENST00000231484	22.4868	0	0	0.81849	8.05532	0	0.05953	0.93652	0.96645	0.67464	7.16933	0	0.70315	6.39455	0	0.25342	3.03013	0.04117	0.04043	0.49307	0.99894	-0.75897	-6.61203	0	-0.14385	-0.80192	0.98462	-0.11535	-1.34064	0.83201	-0.56507	-4.78911	5e-05	-0.77806	-7.3141	0	0.61511	5.77384	0	0.64362	5.10367	1e-05	0.19389	1.9179	0.4696	-0.0191	-0.44639	0.9994	0.02851
ENST00000231498	1.38827	0.22625	0.56923	-0.01411	-0.15725	1	0.05375	0.75601	0.98873	0.05452	0.70247	0.99238	0.01574	0.10461	1	-0.0996	-1.44167	0.77867	-0.08425	-1.23345	0.88064	0.06786	0.8955	0.97302	0.06862	0.84688	0.97965	0.02984	0.25361	0.99998	-0.0855	-1.27677	0.86215	-0.07014	-1.0727	0.93566	0.00076	-0.08731	1	-0.03802	-0.62856	0.99583	-0.15336	-2.06424	0.37689	-0.138	-1.87766	0.49684	-0.03878
ENST00000231509	0.8703	0.51893	0.7997	-0.64793	-0.72414	0.98985	0.79354	0.73132	0.98843	-0.60147	-1.17392	0.89788	-0.80216	-1.27276	0.85825	-0.22677	-0.07013	1	-0.03985	0.07208	1	1.44148	1.38803	0.80115	0.04646	-0.47885	0.99897	-0.15423	-0.58022	0.99698	0.42117	0.63042	0.99523	0.60809	0.76685	0.9864	-1.39501	-1.77632	0.57833	-1.59571	-1.86412	0.52568	-1.02031	-0.77616	0.98457	-0.83339	-0.64353	0.99413	-0.20069
ENST00000231512	0.77817	0.5889	0.83631	-0.1036	-1.59019	0.68874	-0.03666	-0.54999	0.99804	-0.12949	-1.74796	0.58391	-0.08899	-1.23687	0.8795	-0.06641	-0.50174	0.99883	-0.0781	-0.82353	0.98252	0.06694	0.9268	0.9682	-0.02589	-0.1755	1	0.01461	0.29835	0.99994	0.03719	1.02773	0.94755	0.02551	0.71559	0.99166	-0.09283	-1.07766	0.93452	-0.05233	-0.61946	0.99619	-0.02975	0.06393	1	-0.04143	-0.23408	0.99999	0.04051
ENST00000231524	2.14763	0.05391	0.27699	-0.2647	-2.66812	0.1086	-0.059	-0.67304	0.99399	-0.17941	-1.90337	0.47901	-0.29347	-2.99551	0.04529	-0.17412	-1.72373	0.60037	-0.16968	-2.00304	0.41388	0.2057	1.80698	0.54392	0.08529	0.7177	0.99151	-0.02876	-0.40726	0.99965	0.09058	0.85289	0.97906	0.09502	0.58475	0.99723	-0.12041	-1.10997	0.92499	-0.23446	-2.13801	0.33202	-0.11512	-0.95635	0.96287	-0.11068	-1.21494	0.8883	-0.11406
ENST00000231526	0.55731	0.76335	0.91721	-0.8939	-0.93996	0.96263	-0.5598	-0.06778	1	0.45639	0.69261	0.99146	0.78459	0.58364	0.99647	-0.35422	-0.19976	0.99999	-0.73063	-0.49186	0.99879	0.33411	0.82039	0.98104	1.35029	1.59926	0.68421	1.6785	1.47281	0.75638	0.53968	0.71045	0.99104	0.16327	0.42506	0.99949	1.01618	0.72513	0.98933	1.34439	0.62103	0.99517	0.20558	-0.12372	1	-0.17084	-0.4008	0.99963	0.32821
ENST00000231572	5.90614	2e-05	0.00097	-0.03144	-0.52024	0.99857	-0.1765	-2.58701	0.13126	0.13509	1.76124	0.57483	0.05398	0.44697	0.9994	-0.17807	-2.63009	0.11827	-0.17503	-2.67191	0.10669	-0.14506	-2.08182	0.3645	0.16654	2.24259	0.27416	0.08542	0.93796	0.96628	-0.14662	-2.10262	0.35198	-0.14359	-2.14965	0.32455	0.31159	4.15334	0.00072	0.23048	2.89518	0.05946	-0.00157	0.04392	1	0.00147	0.00904	1	-0.08112
ENST00000231668	1.50647	0.18278	0.51723	-1.62597	-2.55772	0.21809	-0.92927	-1.74339	0.60384	-0.61238	-1.17763	0.8883	-0.20569	-0.1729	1	-0.06181	-0.4218	0.99929	0.18162	-0.04293	1	0.6967	0.61866	0.99532	1.01359	1.31175	0.83715	1.42027	2.33944	0.30401	1.56415	1.98542	0.4688	1.80758	2.38463	0.28854	0.31688	0.60909	0.99544	0.72357	1.55684	0.7094	0.86745	1.25918	0.85698	1.11088	1.63312	0.66745	0.40669
ENST00000231721	9.53641	0	0	0.56025	5.39423	0	0.10487	1.2611	0.86943	0.46316	4.73237	5e-05	0.51014	4.68799	7e-05	0.10019	1.33421	0.83577	0.10906	0.92346	0.96883	-0.45538	-3.78618	0.00313	-0.0971	-0.59328	0.997	-0.05011	-0.51012	0.99872	-0.46007	-3.88446	0.00214	-0.45119	-4.291	0.0004	0.35829	3.17744	0.02582	0.40527	3.18294	0.02546	-0.00469	0.02304	1	0.00419	-0.35779	0.99983	0.04698
ENST00000231749	2.72787	0.01673	0.13731	0.50193	1.37762	0.80014	-0.4604	-0.67929	0.99167	-0.71841	-1.48231	0.75034	0.8961	2.11032	0.43657	0.051	0.34376	0.9998	-1.2447	-1.944	0.48066	-0.96232	-1.97879	0.48228	-1.22033	-2.87851	0.15671	0.39418	0.71087	0.98609	-0.45092	-0.95675	0.95135	-1.74663	-3.35107	0.07141	-0.25801	-0.71329	0.98967	1.3565	2.668	0.22691	0.5114	0.97103	0.95214	-0.7843	-1.14315	0.90632	1.61451
ENST00000231751	1.76174	0.11449	0.41051	-0.18235	-0.41725	0.99954	-1.21784	-2.42575	0.20947	0.13082	0.43482	0.99941	-0.06335	0.01389	1	-0.29453	-0.80974	0.98269	-0.06743	0.07023	1	-1.03549	-2.01443	0.4185	0.31317	0.83974	0.97886	0.119	0.41989	0.99952	-0.11218	-0.40428	0.99962	0.11492	0.4717	0.99908	1.34866	2.78368	0.10111	1.15449	2.37365	0.23263	0.92331	1.55621	0.70994	1.15041	2.40478	0.21747	-0.19417
ENST00000231790	0.42814	0.85899	0.95386	0.3556	1.20434	0.89257	0.19447	0.78351	0.98653	0.30882	1.30759	0.8485	0.29732	1.24888	0.87461	0.2144	0.81982	0.98296	0.23464	0.72853	0.99084	-0.16113	-0.34951	0.99986	-0.04679	0.11256	1	-0.05828	0.07478	1	-0.1412	-0.3491	0.99986	-0.12096	-0.44062	0.99945	0.11435	0.45374	0.99934	0.10285	0.41297	0.99962	0.01993	0.01027	1	0.04017	-0.07619	1	-0.0115
ENST00000231887	8.49874	0	2e-05	0.51383	4.38248	0.00054	-0.10689	-0.25003	0.99998	0.52209	4.2271	0.00097	0.49736	3.48119	0.01281	0.30896	2.48878	0.17259	0.007	-0.23676	0.99998	-0.62072	-4.33752	0.00063	0.00826	-0.06557	1	-0.01647	-0.71566	0.99128	-0.20487	-1.71825	0.6056	-0.50683	-4.44289	0.00041	0.62899	4.18783	0.00112	0.60425	3.49698	0.01212	0.41585	2.5612	0.14741	0.11389	0.01948	1	-0.02473
ENST00000231948	2.23829	0.04499	0.24991	0.32202	2.37425	0.21384	0.05829	0.18717	1	0.26997	1.77399	0.56682	0.13308	0.93932	0.9658	-0.01473	-0.44799	0.99938	0.30871	1.9275	0.46379	-0.26373	-2.01859	0.40554	-0.05205	-0.55633	0.99788	-0.18894	-1.34633	0.82918	-0.33675	-2.71551	0.09836	-0.01331	-0.37846	0.99977	0.21168	1.46509	0.76522	0.07479	0.69338	0.99288	-0.07302	-0.59499	0.99693	0.25042	1.61437	0.67319	-0.13689
ENST00000232014	1.39996	0.22009	0.5632	0.36247	0.76815	0.98786	0.46177	1.00836	0.95215	-0.00379	-0.31252	0.99992	-0.23406	-0.75989	0.98854	0.25571	0.43591	0.99948	0.75737	1.80687	0.54371	0.0993	0.28734	0.99995	-0.36626	-1.05273	0.94135	-0.59653	-1.48615	0.75319	-0.10675	-0.30296	0.99994	0.3949	1.05357	0.9411	-0.46556	-1.26944	0.8658	-0.69583	-1.67223	0.63487	-0.20605	-0.56469	0.99773	0.2956	0.71715	0.99157	-0.23027
ENST00000232125	1.4681	0.19475	0.53314	-0.29749	-0.78733	0.98533	1.27827	1.58587	0.6918	0.86096	1.34544	0.82632	0.94511	1.3163	0.83994	0.93796	1.01057	0.94872	0.58302	0.92177	0.9672	1.57576	2.26744	0.2876	1.15845	2.08481	0.38027	1.2426	2.04351	0.40578	1.23545	1.72543	0.60337	0.88052	1.65615	0.64741	-0.41731	-0.32601	0.99989	-0.33316	-0.32934	0.99988	-0.34031	-0.57833	0.99701	-0.69524	-0.69328	0.99209	0.08415
ENST00000232375	2.66775	0.01907	0.14917	0.18909	1.12432	0.91965	0.11229	0.65054	0.9949	0.17693	1.33978	0.83195	0.12048	0.84211	0.97998	-0.24503	-1.28993	0.85582	-0.28838	-1.62441	0.66676	-0.0768	-0.38881	0.99972	-0.01216	0.22898	0.99999	-0.06862	-0.24503	0.99998	-0.43412	-2.35241	0.22634	-0.47747	-2.68993	0.10757	0.06464	0.59708	0.9968	0.00818	0.14956	1	-0.35733	-1.81024	0.54323	-0.40067	-2.12569	0.3429	-0.05646
ENST00000232424	6.9933	0	0.00017	0.06396	0.4353	0.99948	-0.28168	-3.15899	0.02708	0.31319	2.73744	0.09035	0.03325	-0.07879	1	-0.04692	-0.59012	0.9971	-0.29019	-2.45711	0.1762	-0.34565	-3.54076	0.00758	0.24923	2.28237	0.25375	-0.03071	-0.49358	0.99894	-0.11088	-0.99981	0.95407	-0.35416	-2.86069	0.0649	0.59488	5.61179	0	0.31494	2.95512	0.04991	0.23477	2.47983	0.16756	-0.00851	0.76921	0.98779	-0.27994
ENST00000232496	3.71324	0.00221	0.03335	-0.20364	-3.19029	0.02446	-0.13071	-2.13958	0.32995	-0.14063	-2.0685	0.3722	-0.22438	-3.36196	0.014	-0.04709	-0.6984	0.9927	0.00167	-0.20012	0.99999	0.07293	0.83248	0.98157	0.06301	1.06607	0.93786	-0.02073	-0.26822	0.99997	0.15655	2.36147	0.21597	0.20532	2.86365	0.06421	-0.00992	0.17689	1	-0.09366	-1.06024	0.93942	0.08362	1.40891	0.79718	0.13239	1.87858	0.49498	-0.08375
ENST00000232501	1.40461	0.21977	0.56289	-0.0125	0.15336	1	-0.46993	-1.28121	0.85865	-0.56729	-1.24819	0.87304	-0.33252	-0.69814	0.99233	0.35466	1.22124	0.88353	-0.1585	-0.38977	0.99971	-0.45743	-1.40987	0.79497	-0.55479	-1.38129	0.81011	-0.32002	-0.83765	0.98006	0.36716	1.06094	0.93709	-0.146	-0.53229	0.99827	-0.09736	0.11012	1	0.13741	0.59132	0.99692	0.82459	2.37203	0.22465	0.31144	0.86263	0.97708	0.23477
ENST00000232508	1.36581	0.23382	0.57731	-1.10615	-1.2144	0.88204	-0.39961	-0.56562	0.99721	-1.03505	-1.29136	0.84952	0.37821	0.90657	0.96568	-1.07801	-0.87083	0.97395	-0.13627	0.75201	0.98718	0.70654	0.55582	0.99757	0.0711	-0.10041	1	1.48436	2.09732	0.39658	0.02814	0.31899	0.9999	0.96988	1.94959	0.46748	-0.63543	-0.63818	0.99482	0.77782	1.40341	0.79263	-0.6784	-0.25139	0.99998	0.26335	1.26362	0.86122	1.41325
ENST00000232564	2.74157	0.01634	0.13537	0.23675	1.70201	0.6155	0.56479	3.10917	0.0349	0.23144	1.55361	0.71187	0.61318	3.3581	0.01677	0.39004	2.41098	0.19931	0.4066	2.31783	0.24046	0.32804	1.5324	0.72492	-0.0053	-0.11904	1	0.37644	1.73003	0.59717	0.15329	0.77112	0.9874	0.16985	0.67548	0.99379	-0.33334	-1.62051	0.66932	0.0484	0.14609	1	-0.17475	-0.76504	0.98789	-0.15819	-0.85958	0.97788	0.38174
ENST00000232607	1.22322	0.29905	0.64335	0.30309	0.81573	0.98305	1.0722	2.00481	0.4178	0.86388	1.54055	0.71981	0.4167	1.02873	0.94648	0.97031	1.70227	0.61584	0.02832	0.11188	1	0.76911	1.26074	0.86789	0.56079	0.75213	0.98878	0.11361	0.24258	0.99998	0.66721	0.92883	0.96712	-0.27478	-0.67568	0.99375	-0.20832	-0.53373	0.99826	-0.6555	-1.00389	0.95189	-0.10189	-0.34979	0.99985	-1.04389	-1.85086	0.5171	-0.44718
ENST00000232744	0.99615	0.43202	0.74553	0.49065	1.20563	0.89101	0.13899	0.21334	0.99999	0.05022	-0.06479	1	-0.20683	-0.85884	0.97801	-0.10786	-0.32956	0.9999	0.37369	1.04052	0.94374	-0.35166	-0.90699	0.97093	-0.44043	-1.23479	0.87936	-0.69748	-1.99236	0.42413	-0.59851	-1.48173	0.75527	-0.11696	-0.12678	1	-0.08877	-0.26737	0.99997	-0.34582	-0.99532	0.95442	-0.24686	-0.50954	0.9987	0.2347	0.76398	0.98795	-0.25705
ENST00000232766	0.88188	0.51046	0.79534	-0.456	-0.69384	0.99284	-0.69708	-1.47525	0.75928	-0.10222	-0.20658	0.99999	-0.28677	-0.32238	0.99991	-0.63591	-1.34726	0.82877	-0.72641	-1.62684	0.6651	-0.24108	-0.8296	0.9817	0.35378	0.46694	0.99921	0.16923	0.34778	0.99986	-0.17991	-0.68288	0.99346	-0.27041	-0.96417	0.96118	0.59486	1.24115	0.87726	0.41031	1.12596	0.91959	0.06117	0.16103	1	-0.02933	-0.10041	1	-0.18455
ENST00000232854	1.08877	0.37301	0.70307	-1.09637	-1.20023	0.892	-1.27226	-1.48029	0.75559	0.31288	0.79917	0.98401	-0.74629	-0.62312	0.99582	-0.28265	-0.27614	0.99996	-1.04649	-0.78639	0.98568	-0.17589	-0.35493	0.99983	1.40925	1.97029	0.44384	0.35008	0.53959	0.99815	0.81372	0.87469	0.9754	0.04988	0.40015	0.99967	1.58514	2.20674	0.30628	0.52597	0.84909	0.97886	0.98961	1.16203	0.90639	0.22577	0.72462	0.99082	-1.05918
ENST00000232888	3.72753	0.00213	0.03243	0.04714	0.78749	0.9861	-0.08028	-0.92287	0.96881	0.15995	2.49452	0.16403	-0.08584	-0.98285	0.95752	-0.12455	-1.73195	0.59486	-0.0553	-0.63633	0.99558	-0.12742	-1.64558	0.6527	0.11281	1.69747	0.61819	-0.13298	-1.72521	0.59952	-0.17169	-2.46677	0.17408	-0.10243	-1.38878	0.80775	0.24023	3.22264	0.02309	-0.00556	-0.02817	1	-0.04427	-0.72194	0.99123	0.02499	0.29911	0.99994	-0.24578
ENST00000232905	0.38682	0.886	0.96371	-0.02824	-0.72918	0.99081	0.03397	-0.07531	1	0.0445	0.5011	0.99884	-0.0604	-0.74481	0.9897	-0.00744	-0.05785	1	0.01223	-0.47869	0.99911	0.06221	0.59823	0.99687	0.07274	1.20357	0.89294	-0.03216	-0.03676	1	0.02081	0.64036	0.99545	0.04047	0.22452	0.99999	0.01053	0.53601	0.99831	-0.09437	-0.61686	0.99629	-0.04141	0.0189	1	-0.02174	-0.3719	0.99979	-0.1049
ENST00000232974	3.69787	0.00228	0.03416	-0.3287	-2.87237	0.06211	0.14139	1.05542	0.94079	-0.19341	-1.38722	0.80892	-0.21628	-1.64607	0.65219	0.02661	0.26941	0.99997	0.06421	0.40421	0.99966	0.47009	3.695	0.00416	0.13529	1.43593	0.78232	0.11242	1.13556	0.91721	0.35532	3.01366	0.04142	0.39291	3.15711	0.02674	-0.3348	-2.31825	0.23522	-0.35767	-2.54872	0.14235	-0.11477	-0.76699	0.988	-0.07718	-0.64438	0.9953	-0.02287
ENST00000232975	13.4888	0	0	0.69645	5.35182	0	-0.01236	-0.53176	0.99839	0.95866	6.59416	0	0.47619	3.39814	0.01206	0.25573	1.55729	0.7097	0.1833	0.95739	0.96288	-0.70882	-5.48184	0	0.2622	1.38987	0.80753	-0.22026	-1.73839	0.59003	-0.44072	-3.57858	0.00637	-0.51316	-4.19108	0.00055	0.97102	6.63527	0	0.48856	3.65825	0.00474	0.26809	1.94345	0.45133	0.19566	1.39831	0.80303	-0.48246
ENST00000232978	0.55797	0.76295	0.91695	-0.89884	0.04614	1	-0.78112	-0.47517	0.99888	-1.89041	-0.80348	0.98175	-1.57012	-0.84079	0.97687	0.4007	0.76991	0.98382	-0.45654	0.13907	1	0.11772	-0.53658	0.99792	-0.99156	-0.88741	0.97163	-0.67128	-0.92333	0.9652	1.29954	0.75285	0.98613	0.44231	0.09915	1	-1.10928	-0.26524	0.99997	-0.789	-0.31598	0.9999	1.18182	1.19402	0.88581	0.32459	0.60027	0.99609	0.32028
ENST00000233025	0.73862	0.61952	0.85218	0.55872	1.3334	0.82742	0.4945	0.91602	0.96498	-0.12317	-0.29491	0.99993	-0.2564	-0.59532	0.99633	0.05959	-0.0201	1	0.21627	0.32015	0.99989	-0.06422	-0.31724	0.99988	-0.6819	-1.60017	0.68406	-0.81513	-1.88656	0.51384	-0.49913	-1.29362	0.846	-0.34245	-0.95586	0.95703	-0.61767	-1.17031	0.89632	-0.7509	-1.43889	0.77464	-0.43491	-0.89662	0.96853	-0.27822	-0.58528	0.99648	-0.13323
ENST00000233027	1.43749	0.2074	0.54872	-0.28118	-2.05736	0.3816	0.0913	0.43524	0.99947	-0.2154	-1.5988	0.68326	-0.15686	-1.31658	0.84362	-0.11279	-0.6943	0.99283	-0.12559	-1.12757	0.91913	0.37248	2.32879	0.23492	0.06578	0.42538	0.99954	0.12433	0.65742	0.99466	0.16839	1.28425	0.85872	0.1556	0.85722	0.97837	-0.3067	-1.9006	0.48209	-0.24815	-1.63876	0.65737	-0.20409	-1.06392	0.9379	-0.21688	-1.46758	0.76373	0.05854
ENST00000233047	3.44102	0.00383	0.04986	-0.27899	-1.46523	0.76498	-0.26799	-1.49552	0.74723	-0.0505	-0.35269	0.99984	-0.24304	-1.04108	0.94365	-0.61071	-3.00704	0.04579	0.30676	1.26386	0.86729	0.011	-0.12676	1	0.22849	1.07567	0.93449	0.03595	0.37624	0.99977	-0.33172	-1.56758	0.70312	0.58575	2.65012	0.11777	0.21749	1.13157	0.9176	0.02495	0.47542	0.99912	-0.34272	-1.33674	0.83395	0.57475	2.61758	0.1271	-0.19254
ENST00000233055	0.66125	0.68103	0.88137	-0.16147	-1.56612	0.70408	0.00131	0.19613	1	-0.09322	-0.81024	0.98391	-0.02544	-0.27993	0.99996	-0.09514	-0.66744	0.99427	-0.01908	-0.31078	0.99993	0.16278	1.64824	0.6509	0.06825	0.72816	0.99083	0.13604	1.21995	0.88628	0.06633	0.84302	0.98027	0.14239	1.19992	0.89414	-0.09453	-0.94518	0.96494	-0.02675	-0.44994	0.99937	-0.09645	-0.81152	0.98378	-0.02039	-0.47987	0.99909	0.06779
ENST00000233057	2.08104	0.06028	0.29466	0.01597	0.10182	1	0.16036	1.89913	0.48165	0.07102	0.83304	0.98145	-0.0037	-0.26269	0.99997	0.21331	2.49058	0.16442	0.11086	1.31069	0.84697	0.14439	1.78319	0.56	0.05505	0.72324	0.99116	-0.01967	-0.35676	0.99984	0.19734	2.3634	0.21619	0.09489	1.19635	0.89553	-0.08934	-1.08249	0.93315	-0.16406	-2.07124	0.37137	0.05295	0.49726	0.99889	-0.0495	-0.6189	0.99621	-0.07472
ENST00000233072	1.21365	0.30542	0.64878	0.49981	1.46286	0.76328	0.20683	0.85519	0.97649	0.65146	1.50669	0.73841	-0.11116	-0.22413	0.99999	-0.07997	0.09173	1	-0.21206	-0.58893	0.99676	-0.29298	-0.5213	0.99828	0.15166	0.0808	1	-0.61097	-1.64808	0.6541	-0.57977	-1.31927	0.83736	-0.71186	-1.99243	0.4401	0.44463	0.58568	0.99669	-0.31799	-1.04485	0.93885	-0.28679	-0.74051	0.98878	-0.41889	-1.37982	0.80827	-0.76262
ENST00000233078	0.61612	0.71698	0.89747	0.23518	0.76491	0.98727	-0.20427	-0.53985	0.9981	-0.17675	-0.65743	0.99436	0.13088	0.51002	0.9986	0.10492	0.3914	0.99969	0.16365	0.67161	0.99367	-0.43945	-1.25133	0.87045	-0.41192	-1.39955	0.79958	-0.10429	-0.23807	0.99998	-0.13026	-0.34489	0.99985	-0.07152	-0.07381	1	0.02752	-0.08534	1	0.33515	1.00377	0.95098	0.30919	0.88557	0.9734	0.36792	1.15434	0.90806	0.30763
ENST00000233084	1.31476	0.25723	0.6022	-0.02276	-0.5126	0.99869	-0.0897	-1.32374	0.84099	0.00416	-0.02312	1	-0.01586	-0.49504	0.99892	-0.11548	-1.762	0.574	-0.12823	-1.99911	0.41526	-0.06694	-0.83749	0.98103	0.02692	0.4765	0.99913	0.0069	0.0011	1	-0.09272	-1.25412	0.87258	-0.10547	-1.49125	0.75024	0.09386	1.27249	0.86462	0.07384	0.81415	0.9836	-0.02578	-0.36671	0.99981	-0.03853	-0.58499	0.99725	-0.02002
ENST00000233099	0.39084	0.88345	0.96258	0.01147	-0.04197	1	0.09795	0.78201	0.98653	-0.00403	-0.44883	0.99938	0.06725	0.37328	0.99978	0.04811	0.5516	0.99799	-0.02517	-0.33434	0.99989	0.08648	0.81363	0.98344	-0.0155	-0.40206	0.99967	0.05578	0.40921	0.99963	0.03664	0.58583	0.99718	-0.03664	-0.29102	0.99995	-0.10199	-1.17757	0.90209	-0.03071	-0.40339	0.99966	-0.04984	-0.24008	0.99998	-0.12312	-1.06665	0.93728	0.07128
ENST00000233114	1.03184	0.40899	0.73008	0.69406	1.60313	0.68046	1.2978	2.15715	0.324	0.14789	0.7501	0.98922	0.3207	0.64926	0.99503	0.28384	0.8769	0.97579	0.44574	1.40398	0.79952	0.60374	0.71727	0.99139	-0.54617	-0.86622	0.97716	-0.37337	-0.90973	0.97075	-0.41022	-0.68719	0.99322	-0.24833	-0.1968	1	-1.14991	-1.50287	0.74285	-0.9771	-1.52975	0.72656	-1.01396	-1.32919	0.83746	-0.85206	-0.89541	0.9729	0.1728
ENST00000233121	5.66274	4e-05	0.00145	-0.39764	-3.59753	0.00605	-0.09491	-0.82508	0.98242	-0.40069	-3.55839	0.00697	-0.40127	-3.53461	0.0076	-0.07074	-0.43894	0.99946	-0.05261	-0.2308	0.99999	0.30274	2.50639	0.15732	-0.00304	-0.00596	1	-0.00363	-0.04567	1	0.3269	3.00425	0.04281	0.34503	3.2205	0.02203	-0.30578	-2.47855	0.16752	-0.30637	-2.48042	0.16685	0.02417	0.38578	0.99974	0.0423	0.58135	0.99734	-0.00059
ENST00000233143	5.33763	8e-05	0.0025	0.46754	3.61108	0.00574	0.17115	1.58297	0.69337	0.44666	3.50916	0.00828	0.68147	4.97171	1e-05	0.39987	3.451	0.01016	0.37387	3.03896	0.03855	-0.29639	-1.80063	0.5477	-0.02088	-0.0603	1	0.21393	1.48416	0.75442	-0.06766	-0.06104	1	-0.09367	-0.46325	0.99926	0.27551	1.72161	0.6015	0.51032	3.15307	0.02727	0.22872	1.69839	0.6172	0.20272	1.31804	0.84371	0.23481
ENST00000233146	0.81483	0.56042	0.82166	0.00793	-0.06518	1	-0.22139	-0.48702	0.99899	-0.35168	-1.12797	0.91871	0.05185	0.46236	0.99925	0.00915	0.05762	1	0.20277	0.90941	0.97059	-0.22932	-0.42019	0.99957	-0.35961	-1.04983	0.94139	0.04391	0.51993	0.99853	0.00122	0.11931	1	0.19484	0.96201	0.96122	-0.13029	-0.58115	0.99728	0.27324	0.90716	0.97095	0.23054	0.52157	0.99851	0.42416	1.33008	0.83686	0.40352
ENST00000233154	5.63603	3e-05	0.00129	-0.37126	-3.41451	0.01161	0.06759	0.4603	0.99929	-0.15976	-1.49785	0.74625	-0.2013	-1.98595	0.42398	0.13961	0.96307	0.96172	0.15337	1.15395	0.91097	0.43884	3.60686	0.00589	0.2115	1.84699	0.51623	0.16996	1.30386	0.85034	0.51086	4.20288	0.00055	0.52463	4.40995	0.00022	-0.22735	-1.83908	0.52162	-0.26889	-2.2883	0.25021	0.07202	0.4561	0.99933	0.08578	0.63157	0.99578	-0.04154
ENST00000233156	2.01008	0.0694	0.31813	0.01216	-0.16637	1	-0.98325	-2.38514	0.20997	-0.90722	-2.4211	0.19523	-0.54676	-1.00491	0.9523	-0.40845	-1.10135	0.92706	-0.31019	-0.38886	0.99972	-0.99541	-2.18176	0.31011	-0.91938	-2.20956	0.29541	-0.55892	-0.82434	0.98213	-0.42061	-0.9209	0.9688	-0.32235	-0.21934	0.99999	0.07603	0.04364	1	0.43649	1.36787	0.81833	0.5748	1.2506	0.8734	0.67306	1.95892	0.44361	0.36046
ENST00000233190	2.63058	0.02054	0.15675	0.30257	2.53978	0.14528	0.14798	1.39089	0.80698	0.33613	3.04151	0.03809	0.14827	1.10531	0.92673	0.14484	0.95021	0.96422	0.01086	-0.03409	1	-0.15459	-0.97609	0.9592	0.03357	0.53569	0.99832	-0.1543	-1.34112	0.83253	-0.15773	-1.48272	0.75531	-0.29171	-2.48062	0.16634	0.18815	1.46552	0.7654	0.00029	-0.3131	0.99992	-0.00314	-0.45062	0.99937	-0.13712	-1.37837	0.81358	-0.18787
ENST00000233202	0.63138	0.70483	0.89177	-0.63876	-1.5039	0.73875	-0.49422	-1.4089	0.78932	-0.32823	-1.38015	0.80313	-0.75794	-1.55446	0.71055	0.57276	-0.17057	1	-0.35453	-1.16682	0.89617	0.14454	-0.00429	1	0.31054	0.08648	1	-0.11918	-0.06791	1	1.21152	1.23993	0.86496	0.28424	0.27595	0.99995	0.166	0.08491	1	-0.26372	-0.05905	1	1.06698	1.16711	0.89369	0.1397	0.26301	0.99996	-0.42972
ENST00000233330	0.52236	0.79023	0.92809	-0.2597	-0.37054	0.99979	-0.04101	-0.16748	1	0.00128	-0.0236	1	0.73402	0.92534	0.96758	0.17317	0.03548	1	-0.5554	-0.87694	0.97558	0.21869	0.17491	1	0.26098	0.33146	0.99989	0.99371	1.25816	0.86899	0.43287	0.38217	0.99975	-0.29571	-0.51249	0.99866	0.04229	0.13966	1	0.77503	1.02224	0.94771	0.21418	0.19122	1	-0.51439	-0.64725	0.99507	0.73273
ENST00000233336	2.82306	0.01386	0.12148	-0.21081	-2.22281	0.28348	-0.18662	-1.637	0.6582	-0.39946	-4.02826	0.00113	-0.18063	-1.87315	0.49849	-0.11945	-1.5171	0.73462	-0.20762	-2.16708	0.31393	0.02419	0.44136	0.99944	-0.18865	-1.81511	0.53784	0.03018	0.27369	0.99997	0.09136	0.61859	0.99624	0.00319	-0.01224	1	-0.21283	-2.13478	0.33238	0.00599	-0.17067	1	0.06717	0.15528	1	-0.021	-0.44175	0.99944	0.21882
ENST00000233379	6.67023	1e-05	0.00029	0.38282	4.42144	0.00022	0.02119	0.12575	1	0.27162	3.34312	0.01505	0.30683	3.43129	0.01122	0.05737	0.70022	0.99259	0.0336	0.35725	0.99984	-0.36163	-3.98091	0.00145	-0.1112	-1.0058	0.9527	-0.07599	-0.8328	0.98149	-0.32545	-3.54679	0.00748	-0.34922	-3.90234	0.00197	0.25043	2.97564	0.04715	0.28565	3.07484	0.03528	0.03618	0.52816	0.99844	0.01241	0.21097	0.99999	0.03521
ENST00000233468	1.48813	0.18953	0.52624	-0.05041	-0.90551	0.97168	-0.11722	-1.89151	0.48668	0.0625	0.52619	0.99847	-0.02478	-0.26307	0.99997	0.01053	0.32196	0.99991	-0.07236	-1.31717	0.84391	-0.06681	-1.03604	0.94552	0.11291	1.39578	0.80411	0.02562	0.60488	0.99666	0.06093	1.18452	0.89995	-0.02196	-0.43761	0.99947	0.17972	2.32745	0.23252	0.09243	1.5726	0.69998	0.12774	2.11736	0.34352	0.04485	0.59701	0.9969	-0.08729
ENST00000233545	0.54873	0.76999	0.9198	0.53299	1.19429	0.89055	0.01967	0.00989	1	0.09522	0.16647	1	-0.15332	-0.58993	0.99671	-0.08573	-0.19735	0.99999	0.02568	-0.2726	0.99996	-0.51332	-1.10404	0.92169	-0.43777	-1.00431	0.94866	-0.68632	-1.73594	0.59919	-0.61873	-1.34358	0.82602	-0.50731	-1.40857	0.79295	0.07555	0.14509	1	-0.17299	-0.55818	0.99757	-0.10541	-0.19324	0.99999	0.00601	-0.26406	0.99997	-0.24854
ENST00000233557	0.24297	0.96127	0.99005	-0.10113	-0.64699	0.99518	-0.09213	-0.69574	0.99285	-0.09834	-0.53906	0.99825	-0.15873	-0.99425	0.95531	-0.04329	-0.2214	0.99999	-0.10553	-0.85395	0.97901	0.009	-0.08707	1	0.00279	0.09819	1	-0.05759	-0.36338	0.99982	0.05784	0.40206	0.99967	-0.0044	-0.22232	0.99999	-0.00621	0.17846	1	-0.0666	-0.25778	0.99998	0.04884	0.46405	0.99925	-0.0134	-0.12454	1	-0.06039
ENST00000233575	1.76832	0.11282	0.4078	0.09966	1.15383	0.91097	-0.17585	-1.3051	0.84973	0.15993	1.50897	0.73952	0.04582	0.80967	0.98402	-0.05465	-0.33437	0.99989	0.1	0.84062	0.98062	-0.27551	-2.36705	0.21362	0.06027	0.36809	0.9998	-0.05384	-0.30637	0.99993	-0.15431	-1.4375	0.78134	0.00034	-0.27365	0.99997	0.33578	2.67853	0.10462	0.22167	2.01307	0.40683	0.12119	0.94414	0.96525	0.27584	2.0436	0.38757	-0.11411
ENST00000233596	0.71464	0.6386	0.8609	0.17461	0.67708	0.99317	-0.18008	0.01607	1	0.46707	1.40661	0.79469	0.63373	1.19639	0.89026	0.11351	0.20936	0.99999	0.03474	-0.23412	0.99998	-0.35469	-0.62121	0.99573	0.29245	0.74139	0.98877	0.45912	0.54952	0.99774	-0.0611	-0.43791	0.99939	-0.13988	-0.88135	0.97341	0.64715	1.31136	0.84234	0.81381	1.11679	0.91839	0.29359	0.18213	1	0.21481	-0.23668	0.99998	0.16667
ENST00000233609	1.04582	0.40022	0.72417	0.19528	0.9958	0.95457	-0.10937	-0.75243	0.98901	0.06954	-0.05986	1	0.02512	0.01497	1	-0.03847	-0.45224	0.99935	0.25961	1.36046	0.82218	-0.30465	-1.6646	0.64027	-0.12574	-1.01817	0.94945	-0.17016	-0.93122	0.96715	-0.23375	-1.3974	0.80292	0.06433	0.39339	0.99971	0.17891	0.67249	0.99397	0.13449	0.73193	0.99049	0.07091	0.30407	0.99994	0.36898	1.99062	0.42311	-0.04442
ENST00000233615	3.73793	0.00209	0.03209	0.61765	3.03682	0.04226	-0.17454	-0.95075	0.96376	0.38941	2.1608	0.3211	0.14408	0.95794	0.9623	0.53196	2.24233	0.27711	0.34158	1.92442	0.46603	-0.79218	-3.76054	0.00403	-0.22824	-0.83273	0.98121	-0.47357	-1.96741	0.43906	-0.08569	-0.67586	0.99376	-0.27607	-1.03433	0.94546	0.56394	2.92917	0.05653	0.31862	1.7996	0.54961	0.7065	2.99018	0.04763	0.51612	2.71375	0.09879	-0.24533
ENST00000233623	0.29283	0.93935	0.9825	-0.46571	-0.5136	0.99852	-0.87583	-1.19348	0.89321	-0.24737	-0.55195	0.99777	-0.55832	-0.71363	0.99101	-0.28361	-0.44055	0.99938	-0.42102	-0.98176	0.9554	-0.41012	-0.71349	0.9912	0.21834	-0.05354	1	-0.09261	-0.21401	0.99999	0.1821	0.04907	1	0.04469	-0.4974	0.99878	0.62846	0.64274	0.99495	0.31751	0.49459	0.99883	0.59222	0.72657	0.9903	0.45481	0.20837	0.99999	-0.31095
ENST00000233627	1.76261	0.11411	0.40978	0.29939	0.97641	0.95908	0.1261	0.37922	0.99977	0.74914	2.8539	0.06586	0.42125	1.63635	0.65865	0.45279	1.703	0.61412	0.25119	0.75705	0.98879	-0.17329	-0.53431	0.99834	0.44974	1.86999	0.50075	0.12186	0.677	0.99384	0.1534	0.74349	0.98981	-0.0482	-0.19288	1	0.62303	2.30641	0.24142	0.29514	1.16551	0.90696	0.32669	1.22842	0.88318	0.12508	0.34024	0.99988	-0.32789
ENST00000233630	1.60283	0.15374	0.47573	-0.22941	-1.28787	0.85671	-0.26586	-1.60571	0.67885	-0.11481	-0.40141	0.99967	-0.46043	-2.56579	0.1432	-0.35268	-2.02508	0.40237	-0.19812	-0.97884	0.95799	-0.03645	-0.40067	0.99967	0.1146	0.85763	0.97814	-0.23102	-1.30233	0.85013	-0.12327	-0.76695	0.98777	0.03129	0.26915	0.99997	0.15105	1.19767	0.89425	-0.19457	-0.82706	0.98187	-0.08682	-0.32725	0.9999	0.06774	0.64305	0.99525	-0.34562
ENST00000233668	1.78354	0.10799	0.39854	0.22723	0.66621	0.99382	0.45532	1.17594	0.89939	1.15762	1.93494	0.47286	1.04342	2.13584	0.35673	1.2909	2.53268	0.1801	0.06385	0.30677	0.99993	0.22808	0.5464	0.99789	0.93039	1.28336	0.85418	0.81618	1.48113	0.75335	1.06367	1.89038	0.50119	-0.16338	-0.33691	0.99987	0.70231	0.68697	0.99242	0.5881	0.87359	0.97391	0.83558	1.27597	0.85765	-0.39146	-0.85163	0.97771	-0.11421
ENST00000233710	0.83492	0.54562	0.81403	-1.10961	-1.6173	0.67151	-0.30911	-0.44054	0.99942	-1.02421	-1.5153	0.73514	-1.18558	-1.75982	0.57773	-0.96596	-1.46321	0.76579	-0.51758	-0.81571	0.98286	0.8005	1.05006	0.941	0.08541	0.07787	1	-0.07597	-0.20096	0.99999	0.14365	0.09105	1	0.59203	0.72853	0.99061	-0.7151	-0.96506	0.96045	-0.87647	-1.19982	0.89295	-0.65685	-0.92859	0.96725	-0.20847	-0.33658	0.99988	-0.16138
ENST00000233741	0.78732	0.58152	0.8328	0.17207	0.25405	0.99998	-0.77355	-0.9383	0.96481	0.45395	0.79104	0.98473	-0.02463	-0.28042	0.99996	-0.7918	-0.99118	0.95426	0.10137	0.14457	1	-0.94562	-1.17677	0.9002	0.28188	0.5398	0.99805	-0.1967	-0.52522	0.99834	-0.96386	-1.23511	0.87768	-0.07069	-0.10105	1	1.2275	1.67346	0.6361	0.74892	0.6406	0.99513	-0.01825	-0.02639	1	0.87492	1.04421	0.94158	-0.47858
ENST00000233809	6.31559	1e-05	0.0005	0.68194	3.06851	0.03617	0.53971	2.52664	0.15134	1.16037	5.34664	0	1.04506	4.55611	0.00013	0.73854	3.62509	0.00572	0.6151	2.96253	0.04915	-0.14223	-0.34757	0.99986	0.47843	2.33474	0.22994	0.36312	1.62205	0.66814	0.0566	0.62994	0.99582	-0.06684	-0.02297	1	0.62066	2.56148	0.14049	0.50535	1.87827	0.49589	0.19883	0.93752	0.96634	0.07539	0.31865	0.99992	-0.11532
ENST00000233813	9.00681	0	1e-05	-0.21983	-1.77583	0.56451	0.27676	2.29908	0.2443	-0.31665	-2.47436	0.16859	-0.27582	-2.20266	0.29389	0.20567	1.79943	0.54839	0.29271	2.56888	0.13562	0.49659	3.9064	0.00182	-0.09682	-0.71315	0.99186	-0.05599	-0.47669	0.99913	0.4255	3.46713	0.00949	0.51254	4.2438	0.00044	-0.59341	-4.51245	0.00013	-0.55258	-4.24692	0.00043	-0.07109	-0.54131	0.99822	0.01595	0.17148	1	0.04083
ENST00000233838	0.21488	0.97146	0.99297	0.18827	0.21208	0.99999	-0.16551	-0.15073	1	-0.05112	-0.03168	1	-0.16805	-0.28948	0.99995	-0.13026	0.01058	1	0.32554	0.77008	0.98764	-0.35378	-0.34758	0.99986	-0.23939	-0.23884	0.99998	-0.35632	-0.48707	0.99901	-0.31853	-0.19519	1	0.13727	0.55084	0.99801	0.11439	0.11803	1	-0.00254	-0.12766	1	0.03525	0.15623	1	0.49105	0.87467	0.97615	-0.11693
ENST00000233892	1.31399	0.25682	0.60172	-0.08161	0.51384	0.99795	0.44377	1.35522	0.81112	0.51935	1.58643	0.69512	-0.24083	-0.319	0.99986	1.04	2.85534	0.18148	-0.02506	0.2128	0.99999	0.52538	0.87304	0.9681	0.60097	1.05705	0.92308	-0.15922	-0.82626	0.97556	1.12161	2.35099	0.33005	0.05655	-0.2753	0.99994	0.07558	0.08847	1	-0.6846	-1.63684	0.66726	0.59623	1.34495	0.8139	-0.46883	-1.09735	0.91401	-0.76018
ENST00000233893	2.6776	0.01863	0.14701	-0.0084	-0.14001	1	-0.08069	-1.14225	0.91481	0.27769	2.54888	0.14378	-0.08409	-0.86548	0.97747	-0.00346	0.05281	1	-0.02406	-0.45956	0.99929	-0.07229	-1.00218	0.95351	0.28609	2.65123	0.11268	-0.07569	-0.72146	0.99129	0.00494	0.18629	1	-0.01566	-0.32101	0.99991	0.35838	3.47384	0.00977	-0.0034	0.29756	0.99994	0.07723	1.14817	0.91283	0.05663	0.67539	0.9939	-0.36178
ENST00000233944	0.93273	0.47469	0.77333	0.11735	0.12667	1	-0.16586	-1.07991	0.93223	-0.02346	-0.21224	0.99999	-0.46792	-1.60638	0.67863	-0.15313	-0.83168	0.98092	0.22267	0.2427	0.99998	-0.28321	-1.17963	0.8996	-0.14081	-0.33167	0.99989	-0.58527	-1.69962	0.61848	-0.27048	-0.93838	0.96501	0.10532	0.11875	1	0.1424	0.85578	0.97786	-0.30206	-0.43652	0.99944	0.01272	0.26608	0.99997	0.38853	1.25417	0.87018	-0.44446
ENST00000233948	2.9469	0.01072	0.10196	0.61873	1.67613	0.63556	1.53178	3.64633	0.01891	0.94922	2.30831	0.27105	1.2376	2.82403	0.10884	1.13221	2.89218	0.08818	1.14395	2.83151	0.10002	0.91305	2.11092	0.38096	0.33048	0.66329	0.99361	0.61886	1.21138	0.88256	0.51347	1.2899	0.85063	0.52521	1.22827	0.87704	-0.58256	-1.46741	0.7599	-0.29418	-0.92581	0.96336	-0.39958	-0.84099	0.97742	-0.38783	-0.90188	0.96819	0.28838
ENST00000233969	6.78377	0	0.00024	-0.62271	-4.29051	0.0005	-0.01417	0.04519	1	-0.39122	-2.65976	0.11347	-0.72549	-4.42138	0.0003	-0.13283	-1.12426	0.92011	-0.11425	-1.01829	0.94941	0.60854	3.9711	0.00183	0.23148	1.54051	0.72004	-0.10278	-0.24505	0.99998	0.48988	2.95327	0.05262	0.50845	3.07985	0.03661	-0.37706	-2.4878	0.16894	-0.71132	-4.10472	0.0011	-0.11866	-1.08192	0.93284	-0.10009	-0.98984	0.95577	-0.33426
ENST00000234038	1.16283	0.33183	0.67103	-0.29687	-1.33744	0.83388	-0.41427	-1.9155	0.47122	-0.14497	-0.01923	1	-0.33595	-1.62865	0.66385	-0.14646	-0.49117	0.99896	-0.13467	-0.70794	0.99209	-0.11739	-0.65063	0.995	0.1519	1.29852	0.85242	-0.03908	-0.32934	0.9999	0.15041	0.79921	0.98498	0.1622	0.58518	0.99721	0.2693	1.87165	0.50046	0.07831	0.321	0.99991	0.26781	1.38676	0.8088	0.2796	1.18573	0.89935	-0.19098
ENST00000234091	0.55321	0.7665	0.91887	0.75196	1.1915	0.89197	0.34599	0.61339	0.99595	-0.16569	-0.46113	0.99919	0.56514	0.46124	0.99916	0.20708	0.31454	0.99991	-0.4275	-0.2116	0.99999	-0.40597	-0.50255	0.99861	-0.91764	-1.61652	0.67312	-0.18681	-0.67866	0.99266	-0.54487	-0.83333	0.97935	-1.17946	-1.37191	0.81249	-0.51168	-1.02522	0.94468	0.21915	-0.15581	1	-0.13891	-0.29771	0.99993	-0.77349	-0.79572	0.98403	0.73083
[truncated: 52,371 more rows]
[truncated: 17 more columns]
