# Supplementary material for: A transcriptome atlas of leg muscles from healthy human volunteers reveals molecular and cellular signatures associated with muscle location
Source: eLife. 2023 Feb 6;12:e80500. doi: 10.7554/eLife.80500 (PMC9988256; doi:10.7554/eLife.80500)
Supplement: Supplementary file 5. [file elife-80500-supp5.xls]

## Sheet: overview
Supplementary Table S5. The result of differential transcript usage analysis.
ensembl transcript id	The id based on ensembl version 98 (http://sep2019.archive.ensembl.org/).
hgnc symbol	Gene symbol based on ensembl version 98 (http://sep2019.archive.ensembl.org/).
M1	Muscle 1 in the comparsion.
M2	Muscle 2 in the comparsion.
dIF	Difference in isoform fraction (IF2 - IF1).
p.value	The p.value for the transcript usage difference analysis.
FDR	The Benjamini-Hochberg false-discovery rate (FDR) for the transcript usage difference analysis.
IF1	Isoform fraction in Muscle 1 (M1).
IF2	Isoform fraction in Muscle 2 (M2).
abbreviations in M1 and M2:	gracilis (GR), semitendinosus middle (STM), semitendinosus distal (STD), rectus femoris (RF), vastus lateralis (VL), vastus medialis (VM) muscles, and gastrocnemius lateralis (GL).

## Sheet: SupplementaryTableS5
ensembl transcript id	hgnc symbol	M1	M2	dIF	p.value	FDR	IF1	IF2
ENST00000586601	ABCA5	STM	VM	-0.04976	0	3e-05	0.09158	0.04182
ENST00000586995	ABCA5	GR	VM	0.17306	0	0.0014	0.04165	0.21471
ENST00000586601	ABCA5	STM	VL	-0.05081	0	0.00257	0.09158	0.04076
ENST00000586601	ABCA5	STD	VM	-0.04565	1e-05	0.00961	0.08747	0.04182
ENST00000586995	ABCA5	GR	VL	0.12547	1e-05	0.01017	0.04165	0.16712
ENST00000586995	ABCA5	GR	RF	0.14529	1e-05	0.01109	0.04165	0.18694
ENST00000586601	ABCA5	STD	VL	-0.04671	1e-05	0.01334	0.08747	0.04076
ENST00000586601	ABCA5	RF	STM	0.04102	8e-05	0.03957	0.05056	0.09158
ENST00000586601	ABCA5	GR	VM	-0.02808	0.00071	0.12285	0.0699	0.04182
ENST00000586995	ABCA5	STM	VM	0.12513	0.00098	0.14287	0.08958	0.21471
ENST00000586601	ABCA5	RF	STD	0.03691	0.00135	0.15122	0.05056	0.08747
ENST00000586601	ABCA5	GR	VL	-0.02914	0.00155	0.17019	0.0699	0.04076
ENST00000593153	ABCA5	STM	VL	-0.0144	0.00245	0.18716	0.03511	0.02071
ENST00000586601	ABCA5	GL	VL	-0.04254	0.00033	0.25365	0.0833	0.04076
ENST00000586995	ABCA5	STM	VL	0.07754	0.00507	0.25817	0.08958	0.16712
ENST00000588106	ABCA5	STD	VL	-0.03079	0.00224	0.27511	0.15432	0.12353
ENST00000591234	ABCA5	STM	VL	0.11544	0.00605	0.27688	0.07026	0.18571
ENST00000586601	ABCA5	GL	VM	-0.04148	0.00024	0.28854	0.0833	0.04182
ENST00000586995	ABCA5	GL	GR	-0.0936	0.00372	0.33024	0.13525	0.04165
ENST00000586995	ABCA5	RF	STM	-0.09736	0.01451	0.35553	0.18694	0.08958
ENST00000589609	ABCA5	GR	RF	-0.0159	0.02538	0.4108	0.02965	0.01375
ENST00000586995	ABCA5	STD	VM	0.11386	0.00694	0.42803	0.10084	0.21471
ENST00000593153	ABCA5	RF	STM	0.01111	0.02927	0.45774	0.024	0.03511
ENST00000586995	ABCA5	RF	STD	-0.0861	0.03509	0.48116	0.18694	0.10084
ENST00000588877	ABCA5	RF	STM	0.06505	0.03813	0.49386	0.128	0.19305
ENST00000586601	ABCA5	GR	RF	-0.01934	0.04816	0.50424	0.0699	0.05056
ENST00000589609	ABCA5	RF	STM	0.01167	0.04198	0.50761	0.01375	0.02542
ENST00000588877	ABCA5	RF	STD	0.08858	0.05707	0.55453	0.128	0.21658
ENST00000588106	ABCA5	GL	GR	-0.0294	0.01979	0.55569	0.15725	0.12785
ENST00000392676	ABCA5	STM	VL	-0.0722	0.05024	0.55785	0.30984	0.23765
ENST00000588106	ABCA5	RF	STD	0.02138	0.06718	0.57851	0.13294	0.15432
ENST00000593153	ABCA5	STD	VM	-0.00815	0.02012	0.59594	0.03074	0.02259
ENST00000586995	ABCA5	STD	VL	0.06628	0.02975	0.6264	0.10084	0.16712
ENST00000586995	ABCA5	GR	STD	0.05919	0.01056	0.62791	0.04165	0.10084
ENST00000586811	ABCA5	GL	STM	0.03359	0.02219	0.6364	0.00225	0.03584
ENST00000588106	ABCA5	STD	VM	-0.02949	0.02677	0.637	0.15432	0.12482
ENST00000589609	ABCA5	GR	VM	-0.01377	0.06722	0.64892	0.02965	0.01588
ENST00000593153	ABCA5	GR	RF	-0.0108	0.11461	0.65418	0.0348	0.024
ENST00000392676	ABCA5	STM	VM	-0.06549	0.08109	0.66346	0.30984	0.24435
ENST00000593153	ABCA5	STM	VM	-0.01252	0.08509	0.67092	0.03511	0.02259
ENST00000593153	ABCA5	RF	STD	0.00674	0.12256	0.6761	0.024	0.03074
ENST00000392676	ABCA5	GR	VL	-0.1093	0.09249	0.69648	0.34695	0.23765
ENST00000593153	ABCA5	GR	VL	-0.01409	0.09712	0.70656	0.0348	0.02071
ENST00000588877	ABCA5	GR	RF	-0.06475	0.15011	0.70792	0.19275	0.128
ENST00000593153	ABCA5	GR	VM	-0.01221	0.10022	0.72432	0.0348	0.02259
ENST00000586601	ABCA5	GL	RF	-0.03274	0.05379	0.73765	0.0833	0.05056
ENST00000591234	ABCA5	STD	STM	-0.04068	0.03072	0.73807	0.11095	0.07026
ENST00000588106	ABCA5	GL	VL	-0.03372	0.01697	0.74281	0.15725	0.12353
ENST00000588877	ABCA5	STD	VM	-0.06711	0.06183	0.74821	0.21658	0.14947
ENST00000586811	ABCA5	GL	STD	0.01654	0.05771	0.74969	0.00225	0.01879
ENST00000593153	ABCA5	STD	VL	-0.01003	0.06831	0.75253	0.03074	0.02071
ENST00000589609	ABCA5	STM	VM	-0.00954	0.14534	0.75675	0.02542	0.01588
ENST00000588106	ABCA5	GR	STD	0.02647	0.03048	0.76921	0.12785	0.15432
ENST00000392676	ABCA5	GR	VM	-0.1026	0.14437	0.77991	0.34695	0.24435
ENST00000588106	ABCA5	GL	VM	-0.03243	0.01555	0.78735	0.15725	0.12482
ENST00000586811	ABCA5	STM	VM	-0.01214	0.17645	0.78769	0.03584	0.02371
ENST00000586811	ABCA5	RF	STM	0.0014	0.22827	0.79614	0.03444	0.03584
ENST00000586995	ABCA5	GL	RF	0.05169	0.09211	0.80615	0.13525	0.18694
ENST00000589609	ABCA5	GL	RF	-0.00745	0.0932	0.8064	0.0212	0.01375
ENST00000588106	ABCA5	STM	VL	-0.01052	0.2219	0.81067	0.13405	0.12353
ENST00000589609	ABCA5	GR	VL	-0.011	0.19093	0.81432	0.02965	0.01865
ENST00000588877	ABCA5	STM	VM	-0.04358	0.23918	0.83592	0.19305	0.14947
ENST00000591234	ABCA5	STM	VM	0.08162	0.27508	0.85398	0.07026	0.15188
ENST00000593153	ABCA5	GL	STM	0.00991	0.11543	0.85677	0.0252	0.03511
ENST00000586811	ABCA5	RF	STD	-0.01565	0.35435	0.85793	0.03444	0.01879
ENST00000589609	ABCA5	STM	VL	-0.00677	0.3028	0.86197	0.02542	0.01865
ENST00000586811	ABCA5	STM	VL	-0.01684	0.31247	0.86574	0.03584	0.019
ENST00000586811	ABCA5	GL	GR	0.00295	0.21377	0.871	0.00225	0.0052
ENST00000588106	ABCA5	GL	RF	-0.02431	0.15428	0.87178	0.15725	0.13294
ENST00000588106	ABCA5	STM	VM	-0.00923	0.32263	0.87721	0.13405	0.12482
ENST00000591234	ABCA5	RF	STM	-0.05942	0.36104	0.87754	0.12969	0.07026
ENST00000588877	ABCA5	GR	VM	-0.04328	0.28984	0.88315	0.19275	0.14947
ENST00000591234	ABCA5	GL	STM	-0.07289	0.16246	0.88934	0.14315	0.07026
ENST00000591234	ABCA5	STD	VL	0.07476	0.18367	0.8915	0.11095	0.18571
ENST00000589609	ABCA5	GL	STD	-0.00331	0.21355	0.90329	0.0212	0.01789
ENST00000586811	ABCA5	STD	VM	0.00492	0.20865	0.90487	0.01879	0.02371
ENST00000588106	ABCA5	GL	STM	-0.0232	0.20293	0.90776	0.15725	0.13405
ENST00000591234	ABCA5	GL	RF	-0.01346	0.22537	0.90847	0.14315	0.12969
ENST00000591234	ABCA5	GR	VL	0.04401	0.37217	0.90894	0.1417	0.18571
ENST00000593153	ABCA5	GL	STD	0.00554	0.24406	0.91567	0.0252	0.03074
ENST00000588877	ABCA5	GL	RF	-0.0102	0.24706	0.91654	0.1382	0.128
ENST00000588877	ABCA5	GL	STD	0.07838	0.27107	0.92451	0.1382	0.21658
ENST00000392676	ABCA5	RF	STD	-0.03684	0.53356	0.92471	0.29	0.25316
ENST00000392676	ABCA5	GR	RF	-0.05695	0.51319	0.92559	0.34695	0.29
ENST00000392676	ABCA5	STD	STM	0.05668	0.15861	0.92612	0.25316	0.30984
ENST00000392676	ABCA5	RF	STM	0.01984	0.50053	0.92741	0.29	0.30984
ENST00000586601	ABCA5	GL	STM	0.00828	0.27754	0.93443	0.0833	0.09158
ENST00000586995	ABCA5	GL	STM	-0.04567	0.28034	0.93542	0.13525	0.08958
ENST00000591234	ABCA5	GR	RF	-0.01201	0.57304	0.93917	0.1417	0.12969
ENST00000589609	ABCA5	RF	STD	0.00414	0.59307	0.93926	0.01375	0.01789
ENST00000591234	ABCA5	RF	STD	-0.01874	0.61616	0.94376	0.12969	0.11095
ENST00000586811	ABCA5	GR	VM	0.01851	0.48961	0.94396	0.0052	0.02371
ENST00000586811	ABCA5	STD	VL	0.00021	0.35202	0.94643	0.01879	0.019
ENST00000392676	ABCA5	GL	GR	0.06325	0.40932	0.94689	0.2837	0.34695
ENST00000588877	ABCA5	STM	VL	-0.01423	0.55222	0.94716	0.19305	0.17882
ENST00000588106	ABCA5	RF	STM	0.00112	0.60517	0.95097	0.13294	0.13405
ENST00000593153	ABCA5	GL	GR	0.0096	0.44279	0.95457	0.0252	0.0348
ENST00000586601	ABCA5	GL	GR	-0.0134	0.47456	0.95803	0.0833	0.0699
ENST00000586811	ABCA5	GR	RF	0.02924	0.72132	0.96547	0.0052	0.03444
ENST00000586995	ABCA5	STD	STM	-0.01126	0.22698	0.96612	0.10084	0.08958
ENST00000588877	ABCA5	GL	STM	0.05485	0.42299	0.96928	0.1382	0.19305
ENST00000392676	ABCA5	STD	VL	-0.01551	0.47718	0.97013	0.25316	0.23765
ENST00000588106	ABCA5	GR	VL	-0.00432	0.68459	0.9725	0.12785	0.12353
ENST00000586995	ABCA5	GL	STD	-0.03441	0.46052	0.9727	0.13525	0.10084
ENST00000589609	ABCA5	GR	STD	-0.01176	0.2121	0.97339	0.02965	0.01789
ENST00000593153	ABCA5	GL	RF	-0.0012	0.4816	0.97511	0.0252	0.024
ENST00000586601	ABCA5	GR	STD	0.01757	0.22416	0.97521	0.0699	0.08747
ENST00000392676	ABCA5	GR	STD	-0.09379	0.2269	0.97635	0.34695	0.25316
ENST00000588877	ABCA5	STD	VL	-0.03776	0.53432	0.97669	0.21658	0.17882
ENST00000588106	ABCA5	GR	VM	-0.00303	0.69373	0.97739	0.12785	0.12482
ENST00000588877	ABCA5	GR	VL	-0.01393	0.72314	0.97745	0.19275	0.17882
ENST00000586811	ABCA5	GL	RF	0.03219	0.53426	0.97848	0.00225	0.03444
ENST00000588106	ABCA5	STD	STM	-0.02026	0.28115	0.97923	0.15432	0.13405
ENST00000392676	ABCA5	GL	STM	0.02614	0.49372	0.97963	0.2837	0.30984
ENST00000589609	ABCA5	GL	VM	-0.00532	0.10145	0.98246	0.0212	0.01588
ENST00000589609	ABCA5	STD	STM	0.00753	0.30833	0.98444	0.01789	0.02542
ENST00000591234	ABCA5	GR	VM	0.01018	0.75554	0.98505	0.1417	0.15188
ENST00000589609	ABCA5	GL	GR	0.00845	0.6705	0.98643	0.0212	0.02965
ENST00000588106	ABCA5	GR	RF	0.00509	0.85588	0.98686	0.12785	0.13294
ENST00000589609	ABCA5	STD	VL	0.00075	0.71059	0.98955	0.01789	0.01865
ENST00000392676	ABCA5	STD	VM	-0.0088	0.64928	0.99007	0.25316	0.24435
ENST00000591234	ABCA5	GL	GR	-0.00145	0.79274	0.99359	0.14315	0.1417
ENST00000591234	ABCA5	STD	VM	0.04093	0.74074	0.99416	0.11095	0.15188
ENST00000392676	ABCA5	GL	STD	-0.03054	0.62898	0.99542	0.2837	0.25316
ENST00000586811	ABCA5	GR	STD	0.01359	0.39827	0.99575	0.0052	0.01879
ENST00000392676	ABCA5	GL	RF	0.0063	0.87744	0.99763	0.2837	0.29
ENST00000588877	ABCA5	GR	STD	0.02383	0.42641	0.99872	0.19275	0.21658
ENST00000586601	ABCA5	STD	STM	0.00411	0.47629	0.99941	0.08747	0.09158
ENST00000593153	ABCA5	GL	VL	-0.00449	0.15358	0.9999	0.0252	0.02071
ENST00000588877	ABCA5	GL	GR	0.05455	0.94964	1	0.1382	0.19275
ENST00000591234	ABCA5	GL	STD	-0.0322	0.75949	1	0.14315	0.11095
ENST00000586601	ABCA5	GL	STD	0.00417	0.74723	1	0.0833	0.08747
ENST00000588106	ABCA5	GL	STD	-0.00293	0.99783	1	0.15725	0.15432
ENST00000589609	ABCA5	GL	STM	0.00422	0.9067	1	0.0212	0.02542
ENST00000392676	ABCA5	GL	VL	-0.04605	0.36934	1	0.2837	0.23765
ENST00000588877	ABCA5	GL	VL	0.04062	0.77404	1	0.1382	0.17882
ENST00000591234	ABCA5	GL	VL	0.04256	0.44802	1	0.14315	0.18571
ENST00000586995	ABCA5	GL	VL	0.03187	0.2766	1	0.13525	0.16712
ENST00000586811	ABCA5	GL	VL	0.01675	0.31242	1	0.00225	0.019
ENST00000589609	ABCA5	GL	VL	-0.00255	0.59094	1	0.0212	0.01865
ENST00000392676	ABCA5	GL	VM	-0.03935	0.37847	1	0.2837	0.24435
ENST00000588877	ABCA5	GL	VM	0.01127	0.41448	1	0.1382	0.14947
ENST00000591234	ABCA5	GL	VM	0.00873	0.58765	1	0.14315	0.15188
ENST00000586995	ABCA5	GL	VM	0.07946	0.18631	1	0.13525	0.21471
ENST00000586811	ABCA5	GL	VM	0.02146	0.90825	1	0.00225	0.02371
ENST00000593153	ABCA5	GL	VM	-0.00261	0.55531	1	0.0252	0.02259
ENST00000591234	ABCA5	GR	STD	-0.03075	0.86806	1	0.1417	0.11095
ENST00000593153	ABCA5	GR	STD	-0.00406	0.85346	1	0.0348	0.03074
ENST00000392676	ABCA5	GR	STM	-0.03711	0.83538	1	0.34695	0.30984
ENST00000588877	ABCA5	GR	STM	0.0003	0.98321	1	0.19275	0.19305
ENST00000591234	ABCA5	GR	STM	-0.07144	0.1049	1	0.1417	0.07026
ENST00000586995	ABCA5	GR	STM	0.04793	0.32256	1	0.04165	0.08958
ENST00000586601	ABCA5	GR	STM	0.02168	0.03912	1	0.0699	0.09158
ENST00000586811	ABCA5	GR	STM	0.03064	0.35899	1	0.0052	0.03584
ENST00000588106	ABCA5	GR	STM	0.0062	0.52273	1	0.12785	0.13405
ENST00000593153	ABCA5	GR	STM	0.00031	0.74208	1	0.0348	0.03511
ENST00000589609	ABCA5	GR	STM	-0.00423	0.8742	1	0.02965	0.02542
ENST00000586811	ABCA5	GR	VL	0.0138	1	1	0.0052	0.019
ENST00000392676	ABCA5	RF	VL	-0.05235	0.12161	1	0.29	0.23765
ENST00000588877	ABCA5	RF	VL	0.05082	0.10961	1	0.128	0.17882
ENST00000591234	ABCA5	RF	VL	0.05602	0.08902	1	0.12969	0.18571
ENST00000586995	ABCA5	RF	VL	-0.01982	0.71546	1	0.18694	0.16712
ENST00000586601	ABCA5	RF	VL	-0.0098	0.16219	1	0.05056	0.04076
ENST00000586811	ABCA5	RF	VL	-0.01544	0.85591	1	0.03444	0.019
ENST00000588106	ABCA5	RF	VL	-0.00941	0.27934	1	0.13294	0.12353
ENST00000593153	ABCA5	RF	VL	-0.00329	0.7778	1	0.024	0.02071
ENST00000589609	ABCA5	RF	VL	0.0049	0.29581	1	0.01375	0.01865
ENST00000392676	ABCA5	RF	VM	-0.04565	0.37589	1	0.29	0.24435
ENST00000588877	ABCA5	RF	VM	0.02147	0.84555	1	0.128	0.14947
ENST00000591234	ABCA5	RF	VM	0.02219	0.67307	1	0.12969	0.15188
ENST00000586995	ABCA5	RF	VM	0.02777	0.74711	1	0.18694	0.21471
ENST00000586601	ABCA5	RF	VM	-0.00874	0.16783	1	0.05056	0.04182
ENST00000586811	ABCA5	RF	VM	-0.01073	0.82101	1	0.03444	0.02371
ENST00000588106	ABCA5	RF	VM	-0.00811	0.65843	1	0.13294	0.12482
ENST00000593153	ABCA5	RF	VM	-0.00141	0.91008	1	0.024	0.02259
ENST00000589609	ABCA5	RF	VM	0.00213	0.82962	1	0.01375	0.01588
ENST00000588877	ABCA5	STD	STM	-0.02353	0.97256	1	0.21658	0.19305
ENST00000586811	ABCA5	STD	STM	0.01705	0.86474	1	0.01879	0.03584
ENST00000593153	ABCA5	STD	STM	0.00437	0.61966	1	0.03074	0.03511
ENST00000589609	ABCA5	STD	VM	-0.00201	0.92462	1	0.01789	0.01588
ENST00000392676	ABCA5	VL	VM	0.00671	0.64952	1	0.23765	0.24435
ENST00000588877	ABCA5	VL	VM	-0.02935	0.13907	1	0.17882	0.14947
ENST00000591234	ABCA5	VL	VM	-0.03382	0.34852	1	0.18571	0.15188
ENST00000586995	ABCA5	VL	VM	0.04759	0.93669	1	0.16712	0.21471
ENST00000586601	ABCA5	VL	VM	0.00106	0.87141	1	0.04076	0.04182
ENST00000586811	ABCA5	VL	VM	0.00471	0.55054	1	0.019	0.02371
ENST00000588106	ABCA5	VL	VM	0.00129	0.82204	1	0.12353	0.12482
ENST00000593153	ABCA5	VL	VM	0.00188	0.4619	1	0.02071	0.02259
ENST00000589609	ABCA5	VL	VM	-0.00276	0.30791	1	0.01865	0.01588
ENST00000437205	ABCC5	STM	VL	-0.16212	3e-05	0.01849	0.18895	0.02682
ENST00000437205	ABCC5	GR	VL	-0.12373	5e-05	0.03414	0.15055	0.02682
ENST00000427120	ABCC5	GL	STD	0.03658	0.00076	0.17883	0.30495	0.34153
ENST00000437205	ABCC5	GL	VL	-0.13093	0.00016	0.20558	0.15775	0.02682
ENST00000265586	ABCC5	STM	VL	0.03767	0.00856	0.30992	0.07868	0.11635
ENST00000265586	ABCC5	STD	VM	0.04568	0.00284	0.31568	0.04432	0.09
ENST00000265586	ABCC5	STD	VL	0.07204	0.00321	0.3211	0.04432	0.11635
ENST00000437205	ABCC5	STD	VL	-0.08097	0.00389	0.3449	0.10779	0.02682
ENST00000334444	ABCC5	STD	STM	-0.13837	0.00158	0.37527	0.37074	0.23237
ENST00000437205	ABCC5	RF	VL	-0.14274	0.00051	0.40219	0.16956	0.02682
ENST00000265586	ABCC5	STM	VM	0.01132	0.02136	0.45221	0.07868	0.09
ENST00000427120	ABCC5	RF	STD	0.02665	0.03337	0.47297	0.31488	0.34153
ENST00000334444	ABCC5	RF	STD	0.11167	0.03425	0.47759	0.25906	0.37074
ENST00000443376	ABCC5	RF	STD	-0.03695	0.03947	0.49506	0.123	0.08605
ENST00000334444	ABCC5	GR	VL	0.14347	0.02952	0.49785	0.253	0.39647
ENST00000334444	ABCC5	STM	VL	0.1641	0.04483	0.54372	0.23237	0.39647
ENST00000443376	ABCC5	GL	STD	-0.0235	0.01684	0.58256	0.10955	0.08605
ENST00000437205	ABCC5	STD	STM	0.08116	0.01067	0.60141	0.10779	0.18895
ENST00000437205	ABCC5	VL	VM	0.06441	0.00118	0.61161	0.02682	0.09124
ENST00000437205	ABCC5	RF	STD	-0.06177	0.09277	0.63111	0.16956	0.10779
ENST00000334444	ABCC5	GR	VM	0.09506	0.07057	0.66189	0.253	0.34806
ENST00000334444	ABCC5	STM	VM	0.11569	0.09189	0.68141	0.23237	0.34806
ENST00000437205	ABCC5	STM	VM	-0.09771	0.09934	0.69211	0.18895	0.09124
ENST00000334444	ABCC5	GR	STD	0.11774	0.01904	0.70125	0.253	0.37074
ENST00000427120	ABCC5	GR	RF	-0.01217	0.16661	0.72475	0.32705	0.31488
ENST00000427120	ABCC5	STD	VM	-0.03159	0.06462	0.75327	0.34153	0.30994
ENST00000427120	ABCC5	GL	GR	0.0221	0.10465	0.78104	0.30495	0.32705
ENST00000382494	ABCC5	STD	VL	0.00794	0.09767	0.8081	0.028	0.03594
ENST00000382494	ABCC5	STM	VM	0.00773	0.20341	0.80864	0.03374	0.04147
ENST00000265586	ABCC5	GR	VM	-0.0059	0.17613	0.81152	0.0959	0.09
ENST00000382494	ABCC5	STD	VM	0.01347	0.12258	0.84332	0.028	0.04147
ENST00000382494	ABCC5	STM	VL	0.0022	0.28508	0.85242	0.03374	0.03594
ENST00000265586	ABCC5	GR	VL	0.02045	0.24742	0.85497	0.0959	0.11635
ENST00000443376	ABCC5	GR	STD	-0.02795	0.07058	0.86769	0.114	0.08605
ENST00000443376	ABCC5	STD	VM	0.01695	0.16592	0.87516	0.08605	0.103
ENST00000334444	ABCC5	GL	STD	0.08534	0.17848	0.88461	0.2854	0.37074
ENST00000382494	ABCC5	GR	RF	-0.00856	0.40239	0.88822	0.03825	0.02969
ENST00000443376	ABCC5	GR	RF	0.009	0.41959	0.8945	0.114	0.123
ENST00000334444	ABCC5	GL	STM	-0.05303	0.17762	0.89665	0.2854	0.23237
ENST00000427120	ABCC5	STD	VL	-0.03988	0.20055	0.89887	0.34153	0.30165
ENST00000427120	ABCC5	RF	STM	0.0137	0.42934	0.90457	0.31488	0.32858
ENST00000443376	ABCC5	STD	STM	0.029	0.12838	0.90527	0.08605	0.11505
ENST00000382494	ABCC5	GL	STD	-0.0206	0.23943	0.91365	0.0486	0.028
ENST00000443376	ABCC5	STD	VL	0.02012	0.23082	0.91377	0.08605	0.10618
ENST00000265586	ABCC5	RF	STD	-0.04375	0.51634	0.91997	0.08806	0.04432
ENST00000427120	ABCC5	STD	STM	-0.01295	0.1454	0.92076	0.34153	0.32858
ENST00000443376	ABCC5	STM	VL	-0.00888	0.47237	0.92329	0.11505	0.10618
ENST00000427120	ABCC5	GR	VM	-0.01711	0.41388	0.92839	0.32705	0.30994
ENST00000334444	ABCC5	RF	STM	-0.02669	0.5349	0.93556	0.25906	0.23237
ENST00000265586	ABCC5	RF	STM	-0.00938	0.57111	0.94447	0.08806	0.07868
ENST00000437205	ABCC5	GR	RF	0.01901	0.59784	0.94544	0.15055	0.16956
ENST00000443376	ABCC5	STM	VM	-0.01205	0.57496	0.9513	0.11505	0.103
ENST00000443376	ABCC5	RF	STM	-0.00795	0.60851	0.95237	0.123	0.11505
ENST00000334444	ABCC5	GL	GR	-0.0324	0.4316	0.95242	0.2854	0.253
ENST00000265586	ABCC5	GL	STD	-0.02968	0.36572	0.95472	0.074	0.04432
ENST00000437205	ABCC5	GR	VM	-0.05931	0.56177	0.95763	0.15055	0.09124
ENST00000437205	ABCC5	GL	STD	-0.04996	0.39396	0.95874	0.15775	0.10779
ENST00000427120	ABCC5	GR	VL	-0.0254	0.60659	0.96039	0.32705	0.30165
ENST00000382494	ABCC5	GR	VL	-0.00231	0.61413	0.96101	0.03825	0.03594
ENST00000382494	ABCC5	GL	RF	-0.01891	0.39686	0.96159	0.0486	0.02969
ENST00000265586	ABCC5	GL	VM	0.016	0.08102	0.96464	0.074	0.09
ENST00000265586	ABCC5	GR	RF	-0.00784	0.74682	0.96919	0.0959	0.08806
ENST00000427120	ABCC5	GR	STD	0.01448	0.21031	0.97287	0.32705	0.34153
ENST00000437205	ABCC5	GL	STM	0.0312	0.45892	0.97349	0.15775	0.18895
ENST00000443376	ABCC5	GR	VM	-0.011	0.67667	0.97486	0.114	0.103
ENST00000334444	ABCC5	STD	VL	0.02573	0.52744	0.97624	0.37074	0.39647
ENST00000334444	ABCC5	GR	RF	0.00606	0.7875	0.97627	0.253	0.25906
ENST00000265586	ABCC5	GR	STD	-0.05158	0.24762	0.97635	0.0959	0.04432
ENST00000382494	ABCC5	GR	VM	0.00322	0.69153	0.97689	0.03825	0.04147
ENST00000334444	ABCC5	GL	RF	-0.02634	0.49868	0.9769	0.2854	0.25906
ENST00000427120	ABCC5	GL	STM	0.02363	0.48207	0.97752	0.30495	0.32858
ENST00000382494	ABCC5	GL	STM	-0.01486	0.49068	0.97874	0.0486	0.03374
ENST00000382494	ABCC5	GR	STD	-0.01025	0.25917	0.97959	0.03825	0.028
ENST00000443376	ABCC5	GL	RF	0.01345	0.54789	0.97988	0.10955	0.123
ENST00000437205	ABCC5	GL	RF	0.01181	0.57188	0.98249	0.15775	0.16956
ENST00000437205	ABCC5	RF	STM	0.01938	0.77577	0.98392	0.16956	0.18895
ENST00000427120	ABCC5	STM	VM	-0.01864	0.7864	0.98401	0.32858	0.30994
ENST00000265586	ABCC5	GL	GR	0.0219	0.66045	0.98571	0.074	0.0959
ENST00000437205	ABCC5	GL	GR	-0.0072	0.66359	0.98611	0.15775	0.15055
ENST00000265586	ABCC5	RF	VL	0.02829	0.06223	0.98766	0.08806	0.11635
ENST00000334444	ABCC5	GL	VL	0.11107	0.1301	0.98875	0.2854	0.39647
ENST00000443376	ABCC5	GR	VL	-0.00782	0.85153	0.99116	0.114	0.10618
ENST00000437205	ABCC5	STD	VM	-0.01655	0.67592	0.99256	0.10779	0.09124
ENST00000334444	ABCC5	STD	VM	-0.02268	0.73826	0.99416	0.37074	0.34806
ENST00000382494	ABCC5	RF	STD	-0.00169	0.90816	0.99507	0.02969	0.028
ENST00000382494	ABCC5	RF	STM	0.00405	0.87356	0.99548	0.02969	0.03374
ENST00000443376	ABCC5	GL	STM	0.0055	0.74019	0.99706	0.10955	0.11505
ENST00000382494	ABCC5	GL	GR	-0.01035	0.89173	0.99942	0.0486	0.03825
ENST00000427120	ABCC5	STM	VL	-0.02693	0.90464	0.99991	0.32858	0.30165
ENST00000443376	ABCC5	GL	GR	0.00445	0.92524	1	0.10955	0.114
ENST00000265586	ABCC5	GL	RF	0.01406	0.98182	1	0.074	0.08806
ENST00000427120	ABCC5	GL	RF	0.00993	0.94395	1	0.30495	0.31488
ENST00000265586	ABCC5	GL	STM	0.00468	0.98464	1	0.074	0.07868
ENST00000265586	ABCC5	GL	VL	0.04235	0.2435	1	0.074	0.11635
ENST00000427120	ABCC5	GL	VL	-0.0033	0.45297	1	0.30495	0.30165
ENST00000382494	ABCC5	GL	VL	-0.01266	0.98524	1	0.0486	0.03594
ENST00000443376	ABCC5	GL	VL	-0.00337	0.91653	1	0.10955	0.10618
ENST00000334444	ABCC5	GL	VM	0.06266	0.31298	1	0.2854	0.34806
ENST00000437205	ABCC5	GL	VM	-0.06651	0.29221	1	0.15775	0.09124
ENST00000427120	ABCC5	GL	VM	0.00499	0.60007	1	0.30495	0.30994
ENST00000382494	ABCC5	GL	VM	-0.00713	0.87624	1	0.0486	0.04147
ENST00000443376	ABCC5	GL	VM	-0.00655	0.58211	1	0.10955	0.103
ENST00000437205	ABCC5	GR	STD	-0.04276	0.54418	1	0.15055	0.10779
ENST00000334444	ABCC5	GR	STM	-0.02063	0.97744	1	0.253	0.23237
ENST00000265586	ABCC5	GR	STM	-0.01722	0.50694	1	0.0959	0.07868
ENST00000437205	ABCC5	GR	STM	0.0384	0.26789	1	0.15055	0.18895
ENST00000427120	ABCC5	GR	STM	0.00153	0.58374	1	0.32705	0.32858
ENST00000382494	ABCC5	GR	STM	-0.00451	0.71535	1	0.03825	0.03374
ENST00000443376	ABCC5	GR	STM	0.00105	0.97637	1	0.114	0.11505
ENST00000334444	ABCC5	RF	VL	0.13741	0.1158	1	0.25906	0.39647
ENST00000427120	ABCC5	RF	VL	-0.01323	0.71828	1	0.31488	0.30165
ENST00000382494	ABCC5	RF	VL	0.00625	0.27773	1	0.02969	0.03594
ENST00000443376	ABCC5	RF	VL	-0.01682	0.37031	1	0.123	0.10618
ENST00000334444	ABCC5	RF	VM	0.089	0.11025	1	0.25906	0.34806
ENST00000265586	ABCC5	RF	VM	0.00194	0.25427	1	0.08806	0.09
ENST00000437205	ABCC5	RF	VM	-0.07833	0.18546	1	0.16956	0.09124
ENST00000427120	ABCC5	RF	VM	-0.00493	0.76972	1	0.31488	0.30994
ENST00000382494	ABCC5	RF	VM	0.01178	0.22441	1	0.02969	0.04147
ENST00000443376	ABCC5	RF	VM	-0.02	0.25507	1	0.123	0.103
ENST00000265586	ABCC5	STD	STM	0.03437	0.59138	1	0.04432	0.07868
ENST00000382494	ABCC5	STD	STM	0.00574	0.9124	1	0.028	0.03374
ENST00000334444	ABCC5	VL	VM	-0.04841	0.87168	1	0.39647	0.34806
ENST00000265586	ABCC5	VL	VM	-0.02635	0.66107	1	0.11635	0.09
ENST00000427120	ABCC5	VL	VM	0.00829	0.78792	1	0.30165	0.30994
ENST00000382494	ABCC5	VL	VM	0.00553	0.98561	1	0.03594	0.04147
ENST00000443376	ABCC5	VL	VM	-0.00318	0.89121	1	0.10618	0.103
ENST00000670067	AC012358.3	STM	VL	0.15584	2e-05	0.01833	0.03811	0.19394
ENST00000670067	AC012358.3	RF	STM	-0.06221	0.01825	0.39061	0.10031	0.03811
ENST00000670067	AC012358.3	STM	VM	0.06689	0.02439	0.46834	0.03811	0.105
ENST00000366287	AC012358.3	RF	STD	0.03078	0.04453	0.51288	0.00875	0.03953
ENST00000670067	AC012358.3	STD	VL	0.09873	0.01658	0.54022	0.09521	0.19394
ENST00000366287	AC012358.3	STM	VM	-0.0151	0.03993	0.55132	0.02316	0.00806
ENST00000366287	AC012358.3	STD	VM	-0.03147	0.01784	0.56771	0.03953	0.00806
ENST00000627989	AC012358.3	STM	VL	0.07953	0.0839	0.6495	0.085	0.16453
ENST00000629819	AC012358.3	GL	RF	-0.04928	0.02958	0.66752	0.0514	0.00213
ENST00000629819	AC012358.3	RF	STD	0.05309	0.12616	0.6803	0.00213	0.05521
ENST00000366287	AC012358.3	RF	STM	0.01441	0.12484	0.68605	0.00875	0.02316
ENST00000630025	AC012358.3	RF	STD	-0.05515	0.13588	0.69326	0.13831	0.08316
ENST00000629546	AC012358.3	RF	STD	0.02212	0.13809	0.69658	0.00094	0.02305
ENST00000626226	AC012358.3	STM	VL	-0.03813	0.12041	0.70525	0.06037	0.02224
ENST00000625841	AC012358.3	STM	VL	0.01578	0.14404	0.73336	0.00763	0.02341
ENST00000599475	AC012358.3	STM	VM	-0.07232	0.13122	0.73929	0.17632	0.104
ENST00000670067	AC012358.3	GL	STM	-0.07339	0.05064	0.7464	0.1115	0.03811
ENST00000626053	AC012358.3	RF	STD	0.06041	0.1856	0.74935	0.02806	0.08847
ENST00000626053	AC012358.3	STD	VM	-0.06271	0.06256	0.74964	0.08847	0.02576
ENST00000366287	AC012358.3	GL	RF	-0.0011	0.06174	0.75053	0.00985	0.00875
ENST00000627989	AC012358.3	RF	STM	-0.02844	0.17643	0.75295	0.11344	0.085
ENST00000627989	AC012358.3	RF	STD	-0.01502	0.2155	0.77381	0.11344	0.09842
ENST00000625841	AC012358.3	STD	VL	0.02083	0.08337	0.78465	0.00258	0.02341
ENST00000670067	AC012358.3	GL	VL	0.08244	0.02436	0.78596	0.1115	0.19394
ENST00000626226	AC012358.3	STD	VL	-0.06024	0.10807	0.82117	0.08247	0.02224
ENST00000626226	AC012358.3	GL	STM	0.03757	0.09141	0.822	0.0228	0.06037
ENST00000594078	AC012358.3	STM	VL	-0.06007	0.26042	0.83599	0.14737	0.08729
ENST00000629859	AC012358.3	GL	STD	-0.03671	0.11317	0.84151	0.03855	0.00184
ENST00000670067	AC012358.3	STD	STM	-0.05711	0.06632	0.84343	0.09521	0.03811
ENST00000626226	AC012358.3	GL	STD	0.05967	0.11959	0.84532	0.0228	0.08247
ENST00000594078	AC012358.3	STD	VM	0.06333	0.13692	0.85674	0.09084	0.15418
ENST00000594078	AC012358.3	RF	STD	-0.0406	0.35678	0.85882	0.13144	0.09084
ENST00000366287	AC012358.3	STM	VL	-0.01328	0.30889	0.8657	0.02316	0.00988
ENST00000599352	AC012358.3	RF	STD	0.008	0.3689	0.86641	0.00069	0.00868
ENST00000629819	AC012358.3	RF	STM	0.0184	0.34269	0.86766	0.00213	0.02053
ENST00000630025	AC012358.3	STM	VL	-0.07776	0.33282	0.87701	0.126	0.04824
ENST00000626053	AC012358.3	GL	STD	0.06457	0.16819	0.87775	0.0239	0.08847
ENST00000627989	AC012358.3	GL	RF	0.01894	0.17845	0.8877	0.0945	0.11344
ENST00000366287	AC012358.3	GL	STD	0.02968	0.18208	0.88814	0.00985	0.03953
ENST00000600219	AC012358.3	STM	VL	-0.01507	0.37623	0.8891	0.04542	0.03035
ENST00000599475	AC012358.3	RF	STD	-0.00163	0.43044	0.89075	0.11831	0.11668
ENST00000599475	AC012358.3	STM	VL	-0.10537	0.38966	0.89227	0.17632	0.07094
ENST00000625718	AC012358.3	STM	VM	0.03398	0.36627	0.89514	0.18684	0.22082
ENST00000626053	AC012358.3	STM	VM	-0.01355	0.37096	0.89615	0.03932	0.02576
ENST00000594078	AC012358.3	GL	STM	0.03697	0.18065	0.89831	0.1104	0.14737
ENST00000599475	AC012358.3	GL	STD	-0.03357	0.20342	0.8991	0.15025	0.11668
ENST00000629546	AC012358.3	GL	RF	-0.01656	0.20563	0.90095	0.0175	0.00094
ENST00000366287	AC012358.3	STD	VL	-0.02964	0.20765	0.90162	0.03953	0.00988
ENST00000625841	AC012358.3	STD	VM	0.0163	0.20363	0.90377	0.00258	0.01888
ENST00000626053	AC012358.3	GL	VL	0.01398	0.05963	0.90384	0.0239	0.03788
ENST00000599475	AC012358.3	STD	STM	0.05963	0.1276	0.90441	0.11668	0.17632
ENST00000599352	AC012358.3	STM	VM	-0.01605	0.40133	0.90494	0.01605	0
ENST00000625718	AC012358.3	STD	VM	0.06914	0.21409	0.90571	0.15168	0.22082
ENST00000629859	AC012358.3	GL	RF	-0.02418	0.23538	0.91241	0.03855	0.01437
ENST00000599352	AC012358.3	STD	VM	-0.00868	0.23874	0.91739	0.00868	0
ENST00000626226	AC012358.3	RF	STD	0.03566	0.51626	0.91997	0.04681	0.08247
ENST00000625841	AC012358.3	STM	VM	0.01125	0.45214	0.92054	0.00763	0.01888
ENST00000626226	AC012358.3	STM	VM	-0.02384	0.45452	0.92088	0.06037	0.03653
ENST00000629546	AC012358.3	RF	STM	0.00601	0.4824	0.92147	0.00094	0.00695
ENST00000625718	AC012358.3	STD	VL	0.07173	0.26169	0.92364	0.15168	0.22341
ENST00000625841	AC012358.3	RF	STD	-0.01336	0.53336	0.92465	0.01594	0.00258
ENST00000366287	AC012358.3	GL	VM	-0.00179	0.05359	0.9278	0.00985	0.00806
ENST00000599352	AC012358.3	RF	STM	0.01537	0.51168	0.93036	0.00069	0.01605
ENST00000629859	AC012358.3	GL	STM	-0.02892	0.25928	0.9309	0.03855	0.00963
ENST00000625841	AC012358.3	GL	STD	-0.00662	0.30411	0.93601	0.0092	0.00258
ENST00000629546	AC012358.3	STD	VM	-0.01988	0.30457	0.93624	0.02305	0.00318
ENST00000670067	AC012358.3	RF	STD	-0.0051	0.58876	0.93827	0.10031	0.09521
ENST00000599352	AC012358.3	GL	RF	-0.00991	0.31524	0.93874	0.0106	0.00069
ENST00000594078	AC012358.3	STD	STM	0.05653	0.176	0.94048	0.09084	0.14737
ENST00000627989	AC012358.3	STD	VL	0.06611	0.31237	0.94059	0.09842	0.16453
ENST00000629546	AC012358.3	STD	VL	-0.01835	0.32124	0.94183	0.02305	0.00471
ENST00000629859	AC012358.3	GL	VM	-0.0329	0.0682	0.94237	0.03855	0.00565
ENST00000670067	AC012358.3	RF	VL	0.09363	0.02886	0.94507	0.10031	0.19394
ENST00000625718	AC012358.3	GL	STM	0.03714	0.32048	0.94729	0.1497	0.18684
ENST00000600219	AC012358.3	STD	VL	-0.01702	0.38575	0.95275	0.04737	0.03035
ENST00000626226	AC012358.3	RF	STM	0.01356	0.61044	0.95313	0.04681	0.06037
ENST00000626226	AC012358.3	STD	VM	-0.04594	0.38013	0.9541	0.08247	0.03653
ENST00000629819	AC012358.3	STD	VM	-0.03109	0.40005	0.95813	0.05521	0.02412
ENST00000629819	AC012358.3	GL	STM	-0.03087	0.41089	0.96819	0.0514	0.02053
ENST00000626053	AC012358.3	STD	VL	-0.05059	0.48377	0.97085	0.08847	0.03788
ENST00000600219	AC012358.3	RF	STM	-0.00889	0.70768	0.97263	0.05431	0.04542
ENST00000626053	AC012358.3	GL	STM	0.01542	0.46021	0.97349	0.0239	0.03932
ENST00000599475	AC012358.3	RF	STM	0.058	0.71388	0.9736	0.11831	0.17632
ENST00000599475	AC012358.3	GL	RF	-0.03194	0.4673	0.97511	0.15025	0.11831
ENST00000626053	AC012358.3	GL	RF	0.00416	0.474	0.97511	0.0239	0.02806
ENST00000594078	AC012358.3	STD	VL	-0.00355	0.52812	0.97624	0.09084	0.08729
ENST00000625718	AC012358.3	GL	STD	0.00198	0.47829	0.97686	0.1497	0.15168
ENST00000626053	AC012358.3	STM	VL	-0.00143	0.72604	0.97696	0.03932	0.03788
ENST00000629859	AC012358.3	GL	VL	-0.03279	0.1081	0.97723	0.03855	0.00576
ENST00000600219	AC012358.3	GL	STM	-0.03798	0.47978	0.97742	0.0834	0.04542
ENST00000670067	AC012358.3	STD	VM	0.00979	0.52342	0.97761	0.09521	0.105
ENST00000625718	AC012358.3	GL	RF	0.03199	0.51726	0.97767	0.1497	0.18169
ENST00000626226	AC012358.3	GL	RF	0.02401	0.52934	0.97804	0.0228	0.04681
ENST00000629819	AC012358.3	STM	VM	0.00359	0.73771	0.97807	0.02053	0.02412
ENST00000630025	AC012358.3	STD	VL	-0.03492	0.55688	0.97868	0.08316	0.04824
ENST00000599352	AC012358.3	STD	VL	-0.00392	0.56084	0.97868	0.00868	0.00476
ENST00000629819	AC012358.3	STD	VL	-0.04239	0.55488	0.97868	0.05521	0.01282
ENST00000626053	AC012358.3	STD	STM	-0.04916	0.25698	0.9787	0.08847	0.03932
ENST00000625841	AC012358.3	RF	STM	-0.00831	0.74407	0.97902	0.01594	0.00763
ENST00000625718	AC012358.3	GL	VL	0.07371	0.1136	0.97908	0.1497	0.22341
ENST00000630025	AC012358.3	GL	STD	-0.02634	0.49255	0.97985	0.1095	0.08316
ENST00000629546	AC012358.3	STM	VL	-0.00224	0.76069	0.98102	0.00695	0.00471
ENST00000625718	AC012358.3	RF	STD	-0.03	0.82415	0.98228	0.18169	0.15168
ENST00000594078	AC012358.3	RF	STM	0.01593	0.76638	0.98284	0.13144	0.14737
ENST00000629859	AC012358.3	STM	VM	-0.00398	0.77538	0.98329	0.00963	0.00565
ENST00000629546	AC012358.3	STM	VM	-0.00377	0.77887	0.98387	0.00695	0.00318
ENST00000630025	AC012358.3	STD	VM	0.03278	0.58543	0.98398	0.08316	0.11594
ENST00000366287	AC012358.3	GL	STM	0.01331	0.54908	0.98467	0.00985	0.02316
ENST00000599352	AC012358.3	STM	VL	-0.01129	0.78736	0.98472	0.01605	0.00476
ENST00000625718	AC012358.3	RF	STM	0.00515	0.78369	0.98528	0.18169	0.18684
ENST00000630025	AC012358.3	STD	STM	0.04284	0.33056	0.98667	0.08316	0.126
ENST00000630025	AC012358.3	GL	STM	0.0165	0.58669	0.9867	0.1095	0.126
ENST00000594078	AC012358.3	STM	VM	0.00681	0.82107	0.9876	0.14737	0.15418
ENST00000629546	AC012358.3	GL	STM	-0.01055	0.61778	0.98867	0.0175	0.00695
ENST00000627989	AC012358.3	STM	VM	-6e-05	0.84729	0.99068	0.085	0.08494
ENST00000630025	AC012358.3	RF	STM	-0.01231	0.83947	0.99175	0.13831	0.126
ENST00000600219	AC012358.3	STM	VM	0.02776	0.86488	0.99279	0.04542	0.07318
ENST00000625841	AC012358.3	GL	STM	-0.00157	0.68887	0.99327	0.0092	0.00763
ENST00000599475	AC012358.3	GL	STM	0.02607	0.70874	0.99352	0.15025	0.17632
ENST00000599475	AC012358.3	STD	VM	-0.01268	0.74326	0.99416	0.11668	0.104
ENST00000630025	AC012358.3	GL	RF	0.02881	0.75368	0.99445	0.1095	0.13831
ENST00000594078	AC012358.3	GL	RF	0.02104	0.76915	0.99445	0.1104	0.13144
ENST00000599352	AC012358.3	GL	STM	0.00545	0.71811	0.99475	0.0106	0.01605
ENST00000599475	AC012358.3	GL	VL	-0.07931	0.14581	0.99526	0.15025	0.07094
ENST00000600219	AC012358.3	GL	STD	-0.03603	0.63387	0.99574	0.0834	0.04737
ENST00000629859	AC012358.3	STD	VL	0.00392	0.82538	0.99611	0.00184	0.00576
ENST00000600219	AC012358.3	GL	RF	-0.02909	0.84157	0.99644	0.0834	0.05431
ENST00000599475	AC012358.3	STD	VL	-0.04574	0.84978	0.99717	0.11668	0.07094
ENST00000625718	AC012358.3	STM	VL	0.03657	0.87486	0.99722	0.18684	0.22341
ENST00000627989	AC012358.3	GL	STM	-0.0095	0.75044	0.99724	0.0945	0.085
ENST00000629819	AC012358.3	STM	VL	-0.0077	0.88581	0.9977	0.02053	0.01282
ENST00000630025	AC012358.3	STM	VM	-0.01006	0.906	0.99835	0.126	0.11594
ENST00000629859	AC012358.3	RF	STD	-0.01253	0.94011	0.99988	0.01437	0.00184
ENST00000625841	AC012358.3	GL	RF	0.00674	1	1	0.0092	0.01594
ENST00000670067	AC012358.3	GL	RF	-0.01119	1	1	0.1115	0.10031
ENST00000599352	AC012358.3	GL	STD	-0.00192	0.91662	1	0.0106	0.00868
ENST00000594078	AC012358.3	GL	STD	-0.01956	1	1	0.1104	0.09084
ENST00000627989	AC012358.3	GL	STD	0.00392	0.78788	1	0.0945	0.09842
ENST00000629819	AC012358.3	GL	STD	0.00381	0.88674	1	0.0514	0.05521
ENST00000629546	AC012358.3	GL	STD	0.00555	0.72158	1	0.0175	0.02305
ENST00000670067	AC012358.3	GL	STD	-0.01629	0.88592	1	0.1115	0.09521
ENST00000366287	AC012358.3	GL	VL	3e-05	0.52727	1	0.00985	0.00988
ENST00000630025	AC012358.3	GL	VL	-0.06126	0.96513	1	0.1095	0.04824
ENST00000626226	AC012358.3	GL	VL	-0.00056	0.70672	1	0.0228	0.02224
ENST00000599352	AC012358.3	GL	VL	-0.00584	0.65873	1	0.0106	0.00476
ENST00000600219	AC012358.3	GL	VL	-0.05305	0.20737	1	0.0834	0.03035
ENST00000594078	AC012358.3	GL	VL	-0.02311	0.89547	1	0.1104	0.08729
ENST00000627989	AC012358.3	GL	VL	0.07003	0.3294	1	0.0945	0.16453
ENST00000629819	AC012358.3	GL	VL	-0.03858	0.24897	1	0.0514	0.01282
ENST00000629546	AC012358.3	GL	VL	-0.01279	0.79902	1	0.0175	0.00471
ENST00000625841	AC012358.3	GL	VL	0.01421	0.53597	1	0.0092	0.02341
ENST00000625718	AC012358.3	GL	VM	0.07112	0.15061	1	0.1497	0.22082
ENST00000599475	AC012358.3	GL	VM	-0.04625	0.31297	1	0.15025	0.104
ENST00000626053	AC012358.3	GL	VM	0.00186	1	1	0.0239	0.02576
ENST00000630025	AC012358.3	GL	VM	0.00644	0.35983	1	0.1095	0.11594
ENST00000626226	AC012358.3	GL	VM	0.01373	0.41424	1	0.0228	0.03653
ENST00000599352	AC012358.3	GL	VM	-0.0106	0.14141	1	0.0106	0
ENST00000600219	AC012358.3	GL	VM	-0.01022	0.9214	1	0.0834	0.07318
ENST00000594078	AC012358.3	GL	VM	0.04378	0.23594	1	0.1104	0.15418
ENST00000627989	AC012358.3	GL	VM	-0.00956	1	1	0.0945	0.08494
ENST00000629819	AC012358.3	GL	VM	-0.02728	0.27384	1	0.0514	0.02412
ENST00000629546	AC012358.3	GL	VM	-0.01432	0.51452	1	0.0175	0.00318
ENST00000625841	AC012358.3	GL	VM	0.00968	0.58893	1	0.0092	0.01888
ENST00000670067	AC012358.3	GL	VM	-0.0065	0.5731	1	0.1115	0.105
ENST00000600219	AC012358.3	RF	STD	-0.00694	1	1	0.05431	0.04737
ENST00000626053	AC012358.3	RF	STM	0.01125	1	1	0.02806	0.03932
ENST00000629859	AC012358.3	RF	STM	-0.00474	1	1	0.01437	0.00963
ENST00000625718	AC012358.3	RF	VL	0.04172	0.42963	1	0.18169	0.22341
ENST00000366287	AC012358.3	RF	VL	0.00113	0.36099	1	0.00875	0.00988
ENST00000599475	AC012358.3	RF	VL	-0.04737	0.42543	1	0.11831	0.07094
ENST00000626053	AC012358.3	RF	VL	0.00982	0.46383	1	0.02806	0.03788
ENST00000630025	AC012358.3	RF	VL	-0.09008	0.16129	1	0.13831	0.04824
ENST00000626226	AC012358.3	RF	VL	-0.02458	0.22634	1	0.04681	0.02224
ENST00000599352	AC012358.3	RF	VL	0.00408	0.75315	1	0.00069	0.00476
ENST00000600219	AC012358.3	RF	VL	-0.02396	0.20866	1	0.05431	0.03035
ENST00000594078	AC012358.3	RF	VL	-0.04414	0.95531	1	0.13144	0.08729
ENST00000627989	AC012358.3	RF	VL	0.05109	0.95448	1	0.11344	0.16453
ENST00000629819	AC012358.3	RF	VL	0.0107	0.21474	1	0.00213	0.01282
ENST00000629859	AC012358.3	RF	VL	-0.00861	0.97925	1	0.01437	0.00576
ENST00000629546	AC012358.3	RF	VL	0.00377	0.3483	1	0.00094	0.00471
ENST00000625841	AC012358.3	RF	VL	0.00747	0.55607	1	0.01594	0.02341
ENST00000625718	AC012358.3	RF	VM	0.03914	0.30812	1	0.18169	0.22082
ENST00000366287	AC012358.3	RF	VM	-0.00069	0.91883	1	0.00875	0.00806
ENST00000599475	AC012358.3	RF	VM	-0.01431	0.48661	1	0.11831	0.104
ENST00000626053	AC012358.3	RF	VM	-0.0023	0.38941	1	0.02806	0.02576
ENST00000630025	AC012358.3	RF	VM	-0.02237	0.55402	1	0.13831	0.11594
ENST00000626226	AC012358.3	RF	VM	-0.01028	1	1	0.04681	0.03653
ENST00000599352	AC012358.3	RF	VM	-0.00069	0.70096	1	0.00069	0
ENST00000600219	AC012358.3	RF	VM	0.01886	0.87504	1	0.05431	0.07318
ENST00000594078	AC012358.3	RF	VM	0.02274	0.59971	1	0.13144	0.15418
ENST00000627989	AC012358.3	RF	VM	-0.0285	0.30151	1	0.11344	0.08494
ENST00000629819	AC012358.3	RF	VM	0.02199	0.57212	1	0.00213	0.02412
ENST00000629859	AC012358.3	RF	VM	-0.00873	0.65055	1	0.01437	0.00565
ENST00000629546	AC012358.3	RF	VM	0.00224	0.47646	1	0.00094	0.00318
ENST00000625841	AC012358.3	RF	VM	0.00294	0.79626	1	0.01594	0.01888
ENST00000670067	AC012358.3	RF	VM	0.00469	0.89076	1	0.10031	0.105
ENST00000625718	AC012358.3	STD	STM	0.03516	0.5204	1	0.15168	0.18684
ENST00000366287	AC012358.3	STD	STM	-0.01637	0.51419	1	0.03953	0.02316
ENST00000626226	AC012358.3	STD	STM	-0.02211	0.86909	1	0.08247	0.06037
ENST00000599352	AC012358.3	STD	STM	0.00737	0.94925	1	0.00868	0.01605
ENST00000600219	AC012358.3	STD	STM	-0.00195	0.56255	1	0.04737	0.04542
ENST00000627989	AC012358.3	STD	STM	-0.01342	0.83908	1	0.09842	0.085
ENST00000629819	AC012358.3	STD	STM	-0.03468	0.58087	1	0.05521	0.02053
ENST00000629859	AC012358.3	STD	STM	0.00779	0.93816	1	0.00184	0.00963
ENST00000629546	AC012358.3	STD	STM	-0.01611	0.59083	1	0.02305	0.00695
ENST00000625841	AC012358.3	STD	STM	0.00505	0.68907	1	0.00258	0.00763
ENST00000600219	AC012358.3	STD	VM	0.02581	0.94066	1	0.04737	0.07318
ENST00000627989	AC012358.3	STD	VM	-0.01348	1	1	0.09842	0.08494
ENST00000629859	AC012358.3	STD	VM	0.0038	1	1	0.00184	0.00565
ENST00000629859	AC012358.3	STM	VL	-0.00387	0.90663	1	0.00963	0.00576
ENST00000625718	AC012358.3	VL	VM	-0.00259	0.94367	1	0.22341	0.22082
ENST00000366287	AC012358.3	VL	VM	-0.00182	0.55152	1	0.00988	0.00806
ENST00000599475	AC012358.3	VL	VM	0.03306	0.69331	1	0.07094	0.104
ENST00000626053	AC012358.3	VL	VM	-0.01212	0.05027	1	0.03788	0.02576
ENST00000630025	AC012358.3	VL	VM	0.06771	0.58416	1	0.04824	0.11594
ENST00000626226	AC012358.3	VL	VM	0.01429	0.40332	1	0.02224	0.03653
ENST00000599352	AC012358.3	VL	VM	-0.00476	0.51393	1	0.00476	0
ENST00000600219	AC012358.3	VL	VM	0.04282	0.2931	1	0.03035	0.07318
ENST00000594078	AC012358.3	VL	VM	0.06688	0.54136	1	0.08729	0.15418
ENST00000627989	AC012358.3	VL	VM	-0.07959	0.22464	1	0.16453	0.08494
ENST00000629819	AC012358.3	VL	VM	0.01129	0.76154	1	0.01282	0.02412
ENST00000629859	AC012358.3	VL	VM	-0.00012	0.63256	1	0.00576	0.00565
ENST00000629546	AC012358.3	VL	VM	-0.00153	0.78849	1	0.00471	0.00318
ENST00000625841	AC012358.3	VL	VM	-0.00453	0.69603	1	0.02341	0.01888
ENST00000670067	AC012358.3	VL	VM	-0.08894	0.05803	1	0.19394	0.105
ENST00000392112	AFDN	STM	VM	0.14094	0	0.00046	0.015	0.15594
ENST00000400822	AFDN	STM	VM	-0.10538	1e-05	0.01084	0.16874	0.06335
ENST00000400822	AFDN	GL	STM	0.09254	5e-05	0.07527	0.0762	0.16874
ENST00000366809	AFDN	STD	VM	0.02098	0.00037	0.13757	0.01332	0.03429
ENST00000485634	AFDN	RF	STM	0.03745	0.00193	0.15841	0.03212	0.06958
ENST00000366809	AFDN	STM	VM	0.02493	0.00231	0.19365	0.00937	0.03429
ENST00000400824	AFDN	RF	STM	-0.07243	0.00331	0.19986	0.11837	0.04595
ENST00000400825	AFDN	RF	STM	-0.04251	0.00559	0.25218	0.08756	0.04505
ENST00000485634	AFDN	STM	VL	-0.02846	0.0054	0.2644	0.06958	0.04112
ENST00000400825	AFDN	STM	VL	0.02977	0.00711	0.28939	0.04505	0.07482
ENST00000511503	AFDN	GR	RF	-0.0278	0.0098	0.29511	0.1168	0.089
ENST00000392112	AFDN	STM	VL	0.09612	0.00757	0.29528	0.015	0.11112
ENST00000392112	AFDN	GL	STM	-0.10835	0.00154	0.30723	0.12335	0.015
ENST00000400824	AFDN	RF	STD	-0.05937	0.01177	0.34264	0.11837	0.059
ENST00000485634	AFDN	GR	RF	-0.02803	0.01561	0.34662	0.06015	0.03212
ENST00000400822	AFDN	STM	VL	-0.07274	0.01822	0.40057	0.16874	0.096
ENST00000485634	AFDN	RF	STD	0.02045	0.02583	0.44028	0.03212	0.05258
ENST00000485634	AFDN	STM	VM	-0.02928	0.02012	0.44534	0.06958	0.04029
ENST00000392112	AFDN	STD	STM	-0.09895	0.00308	0.4606	0.11395	0.015
ENST00000392108	AFDN	STM	VM	-0.01017	0.02413	0.46796	0.01053	0.00035
ENST00000511503	AFDN	RF	STD	0.02611	0.03292	0.47065	0.089	0.11511
ENST00000400824	AFDN	GR	RF	0.04382	0.04128	0.48008	0.07455	0.11837
ENST00000400825	AFDN	RF	STD	-0.03367	0.04113	0.5007	0.08756	0.05389
ENST00000476946	AFDN	GR	VL	-0.00806	0.03049	0.50333	0.01135	0.00329
ENST00000366809	AFDN	GR	VM	0.02019	0.02832	0.5074	0.0141	0.03429
ENST00000392112	AFDN	RF	STM	-0.05712	0.04953	0.53223	0.07212	0.015
ENST00000511503	AFDN	RF	STM	0.02421	0.05331	0.54413	0.089	0.11321
ENST00000400825	AFDN	STM	VM	0.02465	0.04023	0.55242	0.04505	0.06971
ENST00000511503	AFDN	STM	VL	-0.01474	0.04913	0.55474	0.11321	0.09847
ENST00000476946	AFDN	GR	RF	-0.00748	0.06606	0.55598	0.01135	0.00387
ENST00000476946	AFDN	RF	STM	0.01149	0.07499	0.59713	0.00387	0.01537
ENST00000400825	AFDN	GR	RF	0.02926	0.09396	0.61766	0.0583	0.08756
ENST00000392108	AFDN	RF	STM	0.00734	0.08897	0.62731	0.00319	0.01053
ENST00000476946	AFDN	STM	VL	-0.01207	0.0771	0.63423	0.01537	0.00329
ENST00000511637	AFDN	GL	STD	-0.00392	0.02801	0.63897	0.02955	0.02563
ENST00000400822	AFDN	STD	VM	-0.02328	0.02746	0.64134	0.08663	0.06335
ENST00000485634	AFDN	GR	VL	-0.01903	0.07442	0.65685	0.06015	0.04112
ENST00000392108	AFDN	STD	VM	-0.01412	0.03106	0.65703	0.01447	0.00035
ENST00000392108	AFDN	RF	STD	0.01129	0.10963	0.65721	0.00319	0.01447
ENST00000400822	AFDN	STD	STM	0.08211	0.01726	0.66481	0.08663	0.16874
ENST00000351017	AFDN	GR	VM	-0.06601	0.07204	0.66764	0.3036	0.23759
ENST00000366809	AFDN	GL	STD	-0.00338	0.03741	0.67917	0.0167	0.01332
ENST00000511503	AFDN	STM	VM	-0.01556	0.10164	0.69832	0.11321	0.09765
ENST00000400824	AFDN	GL	STM	-0.0298	0.03558	0.70948	0.07575	0.04595
ENST00000511503	AFDN	GR	VL	-0.01833	0.09988	0.71032	0.1168	0.09847
ENST00000344191	AFDN	STM	VL	-0.00069	0.12501	0.71127	0.01963	0.01894
ENST00000511503	AFDN	GL	RF	-0.0185	0.04683	0.72235	0.1075	0.089
ENST00000507704	AFDN	GL	RF	-0.0228	0.0475	0.72363	0.0878	0.065
ENST00000485634	AFDN	GL	STM	0.02523	0.04086	0.72926	0.04435	0.06958
ENST00000366806	AFDN	STM	VM	0.02836	0.13368	0.74224	0.01253	0.04088
ENST00000366809	AFDN	STM	VL	0.0161	0.15318	0.7462	0.00937	0.02547
ENST00000485634	AFDN	GL	RF	-0.01222	0.05963	0.7464	0.04435	0.03212
ENST00000400824	AFDN	GL	RF	0.04262	0.05998	0.74672	0.07575	0.11837
ENST00000476946	AFDN	GR	VM	-0.00606	0.11911	0.74876	0.01135	0.00529
ENST00000507704	AFDN	RF	STD	0.04026	0.18633	0.74999	0.065	0.10526
ENST00000400822	AFDN	GL	RF	0.08249	0.0635	0.75363	0.0762	0.15869
ENST00000511503	AFDN	GR	VM	-0.01915	0.12211	0.75393	0.1168	0.09765
ENST00000344191	AFDN	RF	STM	0.01651	0.18185	0.75829	0.00313	0.01963
ENST00000400822	AFDN	GL	STD	0.01043	0.06326	0.76066	0.0762	0.08663
ENST00000392108	AFDN	GR	VM	-0.0127	0.12783	0.76125	0.01305	0.00035
ENST00000476946	AFDN	STM	VM	-0.01007	0.15999	0.76965	0.01537	0.00529
ENST00000511637	AFDN	STM	VL	-0.00811	0.17531	0.77295	0.03658	0.02847
ENST00000351017	AFDN	STM	VM	-0.03073	0.16641	0.77712	0.26832	0.23759
ENST00000344191	AFDN	GR	RF	-0.01442	0.21921	0.78143	0.01755	0.00313
ENST00000366809	AFDN	RF	STD	-0.00218	0.23008	0.78599	0.0155	0.01332
ENST00000400825	AFDN	STD	VL	0.02093	0.08746	0.79233	0.05389	0.07482
ENST00000392108	AFDN	GL	STD	0.00717	0.08824	0.81311	0.0073	0.01447
ENST00000511637	AFDN	STD	STM	0.01095	0.05417	0.8151	0.02563	0.03658
ENST00000400822	AFDN	GR	VM	-0.00915	0.18301	0.81797	0.0725	0.06335
ENST00000507704	AFDN	GR	RF	-0.00575	0.26944	0.82072	0.07075	0.065
ENST00000392112	AFDN	RF	VM	0.08382	0.00743	0.82274	0.07212	0.15594
ENST00000400824	AFDN	GL	STD	-0.01675	0.10304	0.82802	0.07575	0.059
ENST00000400824	AFDN	STM	VM	0.04335	0.23652	0.83338	0.04595	0.08929
ENST00000366809	AFDN	STD	VL	0.01215	0.12147	0.83694	0.01332	0.02547
ENST00000511637	AFDN	RF	STD	-0.00568	0.31688	0.84156	0.03131	0.02563
ENST00000344191	AFDN	RF	STD	0.00766	0.31781	0.84242	0.00313	0.01079
ENST00000344191	AFDN	STD	VL	0.00815	0.1253	0.84275	0.01079	0.01894
ENST00000509296	AFDN	GR	VL	0.00544	0.23372	0.84278	0.02315	0.02859
ENST00000392112	AFDN	GR	RF	-0.03698	0.31688	0.84467	0.1091	0.07212
ENST00000511637	AFDN	GL	GR	-0.0003	0.17055	0.84602	0.02955	0.02925
ENST00000366806	AFDN	STD	VM	0.03725	0.12697	0.84825	0.00363	0.04088
ENST00000392112	AFDN	RF	STD	0.04182	0.34376	0.85287	0.07212	0.11395
ENST00000400825	AFDN	GR	VL	0.01652	0.2482	0.85535	0.0583	0.07482
ENST00000511503	AFDN	STD	VL	-0.01663	0.15384	0.8718	0.11511	0.09847
ENST00000392112	AFDN	GR	VM	0.04684	0.26818	0.87337	0.1091	0.15594
ENST00000392108	AFDN	GL	STM	0.00323	0.14804	0.88145	0.0073	0.01053
ENST00000351017	AFDN	GR	VL	-0.03754	0.29732	0.88169	0.3036	0.26606
ENST00000400822	AFDN	RF	STM	0.01005	0.37682	0.88193	0.15869	0.16874
ENST00000509296	AFDN	RF	STD	0.00661	0.41789	0.88666	0.02113	0.02774
ENST00000511637	AFDN	STD	VM	0.00266	0.18226	0.88874	0.02563	0.02829
ENST00000511637	AFDN	STM	VM	-0.00828	0.35316	0.88928	0.03658	0.02829
ENST00000485634	AFDN	GR	VM	-0.01986	0.30451	0.88971	0.06015	0.04029
ENST00000400824	AFDN	STM	VL	0.02393	0.38483	0.89084	0.04595	0.06988
ENST00000366809	AFDN	GL	VM	0.01759	0.03994	0.89094	0.0167	0.03429
ENST00000485634	AFDN	STD	VL	-0.01146	0.18093	0.8912	0.05258	0.04112
ENST00000400822	AFDN	GR	RF	0.08619	0.41277	0.89191	0.0725	0.15869
ENST00000392108	AFDN	GR	RF	-0.00986	0.41481	0.89264	0.01305	0.00319
ENST00000400825	AFDN	GL	STM	-0.0309	0.17381	0.89439	0.07595	0.04505
ENST00000476946	AFDN	RF	STD	0.00355	0.45722	0.90094	0.00387	0.00742
ENST00000400825	AFDN	GL	RF	0.01161	0.21267	0.90249	0.07595	0.08756
ENST00000392112	AFDN	STD	VM	0.04199	0.20418	0.90377	0.11395	0.15594
ENST00000511503	AFDN	STD	VM	-0.01746	0.21569	0.90571	0.11511	0.09765
ENST00000507704	AFDN	RF	STM	0.06268	0.43626	0.90663	0.065	0.12768
ENST00000392112	AFDN	GL	RF	-0.05123	0.22226	0.90695	0.12335	0.07212
ENST00000400825	AFDN	STD	VM	0.01581	0.21861	0.90748	0.05389	0.06971
ENST00000344191	AFDN	GL	GR	0.00875	0.29926	0.91213	0.0088	0.01755
ENST00000485634	AFDN	STD	VM	-0.01228	0.23236	0.91446	0.05258	0.04029
ENST00000392108	AFDN	STM	VL	0.00247	0.44396	0.91483	0.01053	0.013
ENST00000351017	AFDN	GL	GR	0.03965	0.31341	0.91799	0.26395	0.3036
ENST00000509296	AFDN	GL	STD	0.00659	0.25961	0.91995	0.02115	0.02774
ENST00000476946	AFDN	GL	GR	0.0042	0.31915	0.9207	0.00715	0.01135
ENST00000366806	AFDN	GR	RF	-0.00165	0.50932	0.92477	0.0114	0.00975
ENST00000485634	AFDN	GL	STD	0.00823	0.2779	0.92618	0.04435	0.05258
ENST00000509296	AFDN	STD	VM	-0.0068	0.26898	0.9273	0.02774	0.02094
ENST00000507704	AFDN	STM	VM	-0.05227	0.48494	0.9287	0.12768	0.07541
ENST00000400822	AFDN	RF	VM	-0.09533	0.01454	0.92911	0.15869	0.06335
ENST00000344191	AFDN	GL	VL	0.01014	0.07444	0.92929	0.0088	0.01894
ENST00000392108	AFDN	STD	VL	-0.00147	0.27131	0.92948	0.01447	0.013
ENST00000485634	AFDN	STD	STM	0.017	0.16403	0.93166	0.05258	0.06958
ENST00000344191	AFDN	RF	VL	0.01582	0.02552	0.93356	0.00313	0.01894
ENST00000366806	AFDN	GR	VL	0.00572	0.47892	0.93662	0.0114	0.01712
ENST00000507704	AFDN	STD	VM	-0.02985	0.30763	0.9372	0.10526	0.07541
ENST00000485634	AFDN	GL	GR	0.0158	0.39403	0.94305	0.04435	0.06015
ENST00000400822	AFDN	RF	STD	-0.07206	0.61023	0.94321	0.15869	0.08663
ENST00000511637	AFDN	RF	STM	0.00527	0.56697	0.94362	0.03131	0.03658
ENST00000366809	AFDN	GL	STM	-0.00733	0.30629	0.94421	0.0167	0.00937
ENST00000400822	AFDN	GL	GR	-0.0037	0.40137	0.94556	0.0762	0.0725
ENST00000366809	AFDN	RF	STM	-0.00613	0.58955	0.94779	0.0155	0.00937
ENST00000507704	AFDN	STD	VL	-0.01179	0.37045	0.94914	0.10526	0.09347
ENST00000344191	AFDN	GR	VL	0.00139	0.55661	0.95133	0.01755	0.01894
ENST00000511637	AFDN	GR	RF	0.00206	0.62891	0.95264	0.02925	0.03131
ENST00000509296	AFDN	STM	VM	-0.00237	0.58288	0.95269	0.02332	0.02094
ENST00000366806	AFDN	GL	GR	-0.02075	0.43896	0.95301	0.03215	0.0114
ENST00000400825	AFDN	GR	VM	0.01141	0.53588	0.95411	0.0583	0.06971
ENST00000392108	AFDN	GL	GR	0.00575	0.46541	0.95616	0.0073	0.01305
ENST00000351017	AFDN	GR	RF	-0.0316	0.64737	0.95643	0.3036	0.272
ENST00000511637	AFDN	GL	RF	0.00176	0.37786	0.95791	0.02955	0.03131
ENST00000509296	AFDN	STM	VL	0.00527	0.60716	0.95808	0.02332	0.02859
ENST00000400824	AFDN	GR	VM	0.01474	0.56759	0.95852	0.07455	0.08929
ENST00000507704	AFDN	GL	STD	0.01746	0.39715	0.95899	0.0878	0.10526
ENST00000507704	AFDN	GL	GR	-0.01705	0.47937	0.95931	0.0878	0.07075
ENST00000400824	AFDN	STD	VM	0.03029	0.4093	0.95944	0.059	0.08929
ENST00000366806	AFDN	STM	VL	0.00459	0.62875	0.96183	0.01253	0.01712
ENST00000366806	AFDN	GR	VM	0.02948	0.58929	0.96194	0.0114	0.04088
ENST00000344191	AFDN	GL	STM	0.01083	0.37968	0.96203	0.0088	0.01963
ENST00000507704	AFDN	GR	STD	0.03451	0.19568	0.96316	0.07075	0.10526
ENST00000400824	AFDN	GR	STD	-0.01555	0.20023	0.96482	0.07455	0.059
ENST00000400825	AFDN	GL	STD	-0.02206	0.43073	0.96684	0.07595	0.05389
ENST00000476946	AFDN	GL	RF	-0.00328	0.42335	0.96714	0.00715	0.00387
ENST00000351017	AFDN	STD	VM	-0.05541	0.45015	0.96788	0.293	0.23759
ENST00000476946	AFDN	GL	STM	0.00822	0.42189	0.96928	0.00715	0.01537
ENST00000351017	AFDN	STM	VL	-0.00226	0.67387	0.96948	0.26832	0.26606
ENST00000400822	AFDN	STD	VL	0.00937	0.47934	0.97085	0.08663	0.096
ENST00000344191	AFDN	GL	STD	0.00199	0.44684	0.97099	0.0088	0.01079
ENST00000476946	AFDN	STD	VL	-0.00413	0.49367	0.97293	0.00742	0.00329
ENST00000509296	AFDN	RF	STM	0.00219	0.71394	0.9736	0.02113	0.02332
ENST00000400824	AFDN	RF	VL	-0.04849	0.05324	0.97404	0.11837	0.06988
ENST00000366809	AFDN	GR	STD	-0.00078	0.22174	0.97449	0.0141	0.01332
ENST00000366806	AFDN	GR	STD	-0.00777	0.22226	0.97473	0.0114	0.00363
ENST00000476946	AFDN	GR	STD	-0.00393	0.23009	0.97635	0.01135	0.00742
ENST00000351017	AFDN	RF	STM	-0.00368	0.7381	0.9773	0.272	0.26832
ENST00000511637	AFDN	GR	VM	-0.00096	0.70074	0.97846	0.02925	0.02829
ENST00000366809	AFDN	GL	GR	-0.0026	0.59781	0.97873	0.0167	0.0141
ENST00000351017	AFDN	GL	RF	0.00805	0.55651	0.98091	0.26395	0.272
ENST00000366809	AFDN	GR	VL	0.01137	0.75546	0.98107	0.0141	0.02547
ENST00000400824	AFDN	STD	VL	0.01088	0.6037	0.98205	0.059	0.06988
ENST00000366806	AFDN	RF	STD	-0.00612	0.84149	0.98391	0.00975	0.00363
ENST00000507704	AFDN	GR	VL	0.02272	0.79182	0.98566	0.07075	0.09347
ENST00000400825	AFDN	STD	STM	-0.00884	0.31385	0.98573	0.05389	0.04505
ENST00000476946	AFDN	STD	STM	0.00795	0.34387	0.98732	0.00742	0.01537
ENST00000392108	AFDN	GR	VL	-5e-05	0.81521	0.98764	0.01305	0.013
ENST00000511637	AFDN	STD	VL	0.00284	0.73465	0.99097	0.02563	0.02847
ENST00000509296	AFDN	GR	RF	-0.00202	0.89412	0.99141	0.02315	0.02113
ENST00000400824	AFDN	GR	VL	-0.00467	0.85479	0.99167	0.07455	0.06988
ENST00000344191	AFDN	STD	VM	0.01074	0.67555	0.99256	0.01079	0.02153
ENST00000476946	AFDN	STD	VM	-0.00213	0.67633	0.99256	0.00742	0.00529
ENST00000366806	AFDN	GL	RF	-0.0224	0.70238	0.99324	0.03215	0.00975
ENST00000511503	AFDN	GL	STD	0.00761	0.60994	0.9934	0.1075	0.11511
ENST00000400824	AFDN	GL	GR	-0.0012	0.79799	0.99377	0.07575	0.07455
ENST00000511503	AFDN	GL	GR	0.0093	0.79852	0.99377	0.1075	0.1168
ENST00000366809	AFDN	GL	RF	-0.0012	0.73481	0.99416	0.0167	0.0155
ENST00000511637	AFDN	GR	STD	-0.00362	0.31937	0.99423	0.02925	0.02563
ENST00000511503	AFDN	GL	STM	0.00571	0.71608	0.99469	0.1075	0.11321
ENST00000509296	AFDN	GR	STD	0.00459	0.3438	0.99474	0.02315	0.02774
ENST00000509296	AFDN	GL	STM	0.00217	0.71878	0.99481	0.02115	0.02332
ENST00000509296	AFDN	GR	VM	-0.00221	0.87677	0.99569	0.02315	0.02094
ENST00000400822	AFDN	GR	STD	0.01413	0.38392	0.99575	0.0725	0.08663
ENST00000392108	AFDN	GL	RF	-0.00411	0.81531	0.99598	0.0073	0.00319
ENST00000509296	AFDN	GL	GR	0.002	0.8529	0.99615	0.02115	0.02315
ENST00000509296	AFDN	GL	RF	-2e-05	0.85174	0.99682	0.02115	0.02113
ENST00000507704	AFDN	STM	VL	-0.03421	0.873	0.99697	0.12768	0.09347
ENST00000392112	AFDN	GL	STD	-0.0094	0.66117	0.9972	0.12335	0.11395
ENST00000366809	AFDN	STD	STM	-0.00395	0.46528	0.99722	0.01332	0.00937
ENST00000509296	AFDN	STD	VL	0.00085	0.8806	0.99796	0.02774	0.02859
ENST00000366806	AFDN	STD	STM	0.00889	0.46888	0.99816	0.00363	0.01253
ENST00000507704	AFDN	GR	VM	0.00466	0.89531	0.99831	0.07075	0.07541
ENST00000507704	AFDN	GL	STM	0.03988	0.8728	0.9984	0.0878	0.12768
ENST00000400825	AFDN	GR	STD	-0.00441	0.42951	0.99872	0.0583	0.05389
ENST00000392112	AFDN	GR	VL	0.00202	0.92481	0.99976	0.1091	0.11112
ENST00000400825	AFDN	GL	GR	-0.01765	0.96224	1	0.07595	0.0583
ENST00000392112	AFDN	GL	GR	-0.01425	0.93134	1	0.12335	0.1091
ENST00000344191	AFDN	GL	RF	-0.00568	1	1	0.0088	0.00313
ENST00000351017	AFDN	GL	STD	0.02905	0.74547	1	0.26395	0.293
ENST00000366806	AFDN	GL	STD	-0.02852	0.79073	1	0.03215	0.00363
ENST00000476946	AFDN	GL	STD	0.00027	0.78105	1	0.00715	0.00742
ENST00000351017	AFDN	GL	STM	0.00437	0.89528	1	0.26395	0.26832
ENST00000366806	AFDN	GL	STM	-0.01962	1	1	0.03215	0.01253
ENST00000511637	AFDN	GL	STM	0.00703	0.96898	1	0.02955	0.03658
ENST00000400825	AFDN	GL	VL	-0.00113	0.48858	1	0.07595	0.07482
ENST00000351017	AFDN	GL	VL	0.00211	0.72321	1	0.26395	0.26606
ENST00000392108	AFDN	GL	VL	0.0057	0.46384	1	0.0073	0.013
ENST00000392112	AFDN	GL	VL	-0.01223	0.92073	1	0.12335	0.11112
ENST00000400824	AFDN	GL	VL	-0.00587	0.39538	1	0.07575	0.06988
ENST00000366809	AFDN	GL	VL	0.00877	0.79502	1	0.0167	0.02547
ENST00000400822	AFDN	GL	VL	0.0198	0.41905	1	0.0762	0.096
ENST00000366806	AFDN	GL	VL	-0.01503	0.79848	1	0.03215	0.01712
ENST00000511637	AFDN	GL	VL	-0.00108	0.43221	1	0.02955	0.02847
ENST00000509296	AFDN	GL	VL	0.00744	0.24797	1	0.02115	0.02859
ENST00000507704	AFDN	GL	VL	0.00567	0.85733	1	0.0878	0.09347
ENST00000476946	AFDN	GL	VL	-0.00386	0.20354	1	0.00715	0.00329
ENST00000485634	AFDN	GL	VL	-0.00323	0.47418	1	0.04435	0.04112
ENST00000511503	AFDN	GL	VL	-0.00903	0.51019	1	0.1075	0.09847
ENST00000400825	AFDN	GL	VM	-0.00624	0.71392	1	0.07595	0.06971
ENST00000344191	AFDN	GL	VM	0.01273	0.2165	1	0.0088	0.02153
ENST00000351017	AFDN	GL	VM	-0.02636	0.92665	1	0.26395	0.23759
ENST00000392108	AFDN	GL	VM	-0.00695	0.3268	1	0.0073	0.00035
ENST00000392112	AFDN	GL	VM	0.03259	0.44101	1	0.12335	0.15594
ENST00000400824	AFDN	GL	VM	0.01354	0.26395	1	0.07575	0.08929
ENST00000400822	AFDN	GL	VM	-0.01285	0.71311	1	0.0762	0.06335
ENST00000366806	AFDN	GL	VM	0.00873	0.31745	1	0.03215	0.04088
ENST00000511637	AFDN	GL	VM	-0.00126	0.65735	1	0.02955	0.02829
ENST00000509296	AFDN	GL	VM	-0.00021	0.9191	1	0.02115	0.02094
ENST00000507704	AFDN	GL	VM	-0.01239	0.36025	1	0.0878	0.07541
ENST00000476946	AFDN	GL	VM	-0.00186	0.43764	1	0.00715	0.00529
ENST00000485634	AFDN	GL	VM	-0.00406	0.91763	1	0.04435	0.04029
ENST00000511503	AFDN	GL	VM	-0.00985	0.59532	1	0.1075	0.09765
ENST00000366809	AFDN	GR	RF	0.0014	1	1	0.0141	0.0155
ENST00000344191	AFDN	GR	STD	-0.00676	0.68846	1	0.01755	0.01079
ENST00000351017	AFDN	GR	STD	-0.0106	0.64067	1	0.3036	0.293
ENST00000392108	AFDN	GR	STD	0.00142	0.50683	1	0.01305	0.01447
ENST00000392112	AFDN	GR	STD	0.00485	0.93912	1	0.1091	0.11395
ENST00000485634	AFDN	GR	STD	-0.00757	0.94439	1	0.06015	0.05258
ENST00000511503	AFDN	GR	STD	-0.00169	0.92893	1	0.1168	0.11511
ENST00000400825	AFDN	GR	STM	-0.01325	0.11816	1	0.0583	0.04505
ENST00000344191	AFDN	GR	STM	0.00208	1	1	0.01755	0.01963
ENST00000351017	AFDN	GR	STM	-0.03528	0.56097	1	0.3036	0.26832
ENST00000392108	AFDN	GR	STM	-0.00252	0.32359	1	0.01305	0.01053
ENST00000392112	AFDN	GR	STM	-0.0941	0.00394	1	0.1091	0.015
ENST00000400824	AFDN	GR	STM	-0.0286	0.10867	1	0.07455	0.04595
ENST00000366809	AFDN	GR	STM	-0.00473	0.61473	1	0.0141	0.00937
ENST00000400822	AFDN	GR	STM	0.09624	0.00809	1	0.0725	0.16874
ENST00000366806	AFDN	GR	STM	0.00113	0.57911	1	0.0114	0.01253
ENST00000511637	AFDN	GR	STM	0.00733	0.22761	1	0.02925	0.03658
ENST00000509296	AFDN	GR	STM	0.00017	0.90182	1	0.02315	0.02332
ENST00000507704	AFDN	GR	STM	0.05693	0.46607	1	0.07075	0.12768
ENST00000476946	AFDN	GR	STM	0.00402	0.67652	1	0.01135	0.01537
ENST00000485634	AFDN	GR	STM	0.00943	0.31184	1	0.06015	0.06958
ENST00000511503	AFDN	GR	STM	-0.00359	0.72691	1	0.1168	0.11321
ENST00000400822	AFDN	GR	VL	0.0235	0.9374	1	0.0725	0.096
ENST00000511637	AFDN	GR	VL	-0.00078	0.96585	1	0.02925	0.02847
ENST00000344191	AFDN	GR	VM	0.00398	0.92979	1	0.01755	0.02153
ENST00000351017	AFDN	RF	STD	0.021	0.95139	1	0.272	0.293
ENST00000366806	AFDN	RF	STM	0.00278	1	1	0.00975	0.01253
ENST00000400825	AFDN	RF	VL	-0.01274	0.47309	1	0.08756	0.07482
ENST00000351017	AFDN	RF	VL	-0.00594	0.61532	1	0.272	0.26606
ENST00000392108	AFDN	RF	VL	0.00981	0.48853	1	0.00319	0.013
ENST00000392112	AFDN	RF	VL	0.03899	0.51473	1	0.07212	0.11112
ENST00000366809	AFDN	RF	VL	0.00997	0.77064	1	0.0155	0.02547
ENST00000400822	AFDN	RF	VL	-0.06269	0.85927	1	0.15869	0.096
ENST00000366806	AFDN	RF	VL	0.00737	0.87667	1	0.00975	0.01712
ENST00000511637	AFDN	RF	VL	-0.00284	0.71624	1	0.03131	0.02847
ENST00000509296	AFDN	RF	VL	0.00746	0.41691	1	0.02113	0.02859
ENST00000507704	AFDN	RF	VL	0.02847	0.14458	1	0.065	0.09347
ENST00000476946	AFDN	RF	VL	-0.00058	0.9326	1	0.00387	0.00329
ENST00000485634	AFDN	RF	VL	0.00899	0.40866	1	0.03212	0.04112
ENST00000511503	AFDN	RF	VL	0.00947	0.28053	1	0.089	0.09847
ENST00000400825	AFDN	RF	VM	-0.01786	0.3961	1	0.08756	0.06971
ENST00000344191	AFDN	RF	VM	0.0184	0.14103	1	0.00313	0.02153
ENST00000351017	AFDN	RF	VM	-0.03441	0.21136	1	0.272	0.23759
ENST00000392108	AFDN	RF	VM	-0.00283	0.88938	1	0.00319	0.00035
ENST00000400824	AFDN	RF	VM	-0.02908	0.08809	1	0.11837	0.08929
ENST00000366809	AFDN	RF	VM	0.01879	0.04401	1	0.0155	0.03429
ENST00000366806	AFDN	RF	VM	0.03113	0.30694	1	0.00975	0.04088
ENST00000511637	AFDN	RF	VM	-0.00302	0.94542	1	0.03131	0.02829
ENST00000509296	AFDN	RF	VM	-0.00018	0.89465	1	0.02113	0.02094
ENST00000507704	AFDN	RF	VM	0.01041	0.46656	1	0.065	0.07541
ENST00000476946	AFDN	RF	VM	0.00142	0.73312	1	0.00387	0.00529
ENST00000485634	AFDN	RF	VM	0.00817	0.14576	1	0.03212	0.04029
ENST00000511503	AFDN	RF	VM	0.00865	0.40784	1	0.089	0.09765
ENST00000344191	AFDN	STD	STM	0.00884	0.96161	1	0.01079	0.01963
ENST00000351017	AFDN	STD	STM	-0.02468	0.62261	1	0.293	0.26832
ENST00000392108	AFDN	STD	STM	-0.00395	0.69445	1	0.01447	0.01053
ENST00000400824	AFDN	STD	STM	-0.01305	0.86615	1	0.059	0.04595
ENST00000509296	AFDN	STD	STM	-0.00442	0.80875	1	0.02774	0.02332
ENST00000507704	AFDN	STD	STM	0.02242	0.85881	1	0.10526	0.12768
ENST00000511503	AFDN	STD	STM	-0.00189	0.99422	1	0.11511	0.11321
ENST00000351017	AFDN	STD	VL	-0.02694	0.96951	1	0.293	0.26606
ENST00000392112	AFDN	STD	VL	-0.00283	0.95504	1	0.11395	0.11112
ENST00000366806	AFDN	STD	VL	0.01349	1	1	0.00363	0.01712
ENST00000344191	AFDN	STM	VM	0.0019	1	1	0.01963	0.02153
ENST00000400825	AFDN	VL	VM	-0.00512	0.56524	1	0.07482	0.06971
ENST00000344191	AFDN	VL	VM	0.00259	0.67809	1	0.01894	0.02153
ENST00000351017	AFDN	VL	VM	-0.02847	0.95618	1	0.26606	0.23759
ENST00000392108	AFDN	VL	VM	-0.01265	0.25717	1	0.013	0.00035
ENST00000392112	AFDN	VL	VM	0.04482	0.52583	1	0.11112	0.15594
ENST00000400824	AFDN	VL	VM	0.01941	0.90198	1	0.06988	0.08929
ENST00000366809	AFDN	VL	VM	0.00882	0.14725	1	0.02547	0.03429
ENST00000400822	AFDN	VL	VM	-0.03265	0.38283	1	0.096	0.06335
ENST00000366806	AFDN	VL	VM	0.02376	0.52418	1	0.01712	0.04088
ENST00000511637	AFDN	VL	VM	-0.00018	0.63561	1	0.02847	0.02829
ENST00000509296	AFDN	VL	VM	-0.00765	0.11742	1	0.02859	0.02094
ENST00000507704	AFDN	VL	VM	-0.01806	0.29011	1	0.09347	0.07541
ENST00000476946	AFDN	VL	VM	0.002	0.41052	1	0.00329	0.00529
ENST00000485634	AFDN	VL	VM	-0.00082	0.41381	1	0.04112	0.04029
ENST00000511503	AFDN	VL	VM	-0.00082	0.84904	1	0.09847	0.09765
ENST00000225737	AKAP10	STM	VM	-0.12255	3e-05	0.02493	0.73679	0.61424
ENST00000460046	AKAP10	STM	VM	0.14938	8e-05	0.0398	0.17826	0.32765
ENST00000460046	AKAP10	GR	VM	0.12895	0.0001	0.04612	0.1987	0.32765
ENST00000225737	AKAP10	STD	STM	0.09595	3e-05	0.08497	0.64084	0.73679
ENST00000460046	AKAP10	STD	STM	-0.10126	0.00018	0.1702	0.27953	0.17826
ENST00000225737	AKAP10	GR	VM	-0.09461	0.00185	0.18922	0.70885	0.61424
ENST00000225737	AKAP10	RF	STM	0.08166	0.00685	0.27153	0.65512	0.73679
ENST00000460046	AKAP10	RF	STM	-0.09186	0.02072	0.40678	0.27012	0.17826
ENST00000460046	AKAP10	GR	STD	0.08083	0.00224	0.44692	0.1987	0.27953
ENST00000460046	AKAP10	GR	RF	0.07143	0.04956	0.50971	0.1987	0.27012
ENST00000225737	AKAP10	GL	STM	0.09814	0.01217	0.55242	0.63865	0.73679
ENST00000225737	AKAP10	GR	RF	-0.05373	0.08409	0.60044	0.70885	0.65512
ENST00000225737	AKAP10	GR	STD	-0.06801	0.01694	0.69612	0.70885	0.64084
ENST00000460046	AKAP10	GL	GR	-0.05775	0.08025	0.74109	0.25645	0.1987
ENST00000225737	AKAP10	STM	VL	-0.08508	0.15827	0.75259	0.73679	0.65171
ENST00000225737	AKAP10	GL	GR	0.0702	0.11872	0.79592	0.63865	0.70885
ENST00000460046	AKAP10	GL	STM	-0.07819	0.07581	0.79747	0.25645	0.17826
ENST00000474245	AKAP10	STM	VL	0.01132	0.20664	0.79917	0.04821	0.05953
ENST00000460046	AKAP10	GR	VL	0.04883	0.21501	0.83155	0.1987	0.24753
ENST00000460046	AKAP10	STM	VL	0.06927	0.28301	0.85192	0.17826	0.24753
ENST00000474245	AKAP10	GL	STM	-0.02519	0.13331	0.86931	0.0734	0.04821
ENST00000460046	AKAP10	STD	VM	0.04812	0.17785	0.88468	0.27953	0.32765
ENST00000474245	AKAP10	GR	VM	-0.02696	0.32478	0.89413	0.06825	0.04129
ENST00000225737	AKAP10	GR	VL	-0.05714	0.37179	0.90894	0.70885	0.65171
ENST00000460046	AKAP10	RF	STD	0.0094	0.48412	0.90965	0.27012	0.27953
ENST00000225737	AKAP10	RF	STD	-0.01428	0.53526	0.92513	0.65512	0.64084
ENST00000225737	AKAP10	STD	VM	-0.02661	0.36234	0.95055	0.64084	0.61424
ENST00000474245	AKAP10	RF	STM	-0.00448	0.61486	0.95385	0.05269	0.04821
ENST00000474245	AKAP10	GR	RF	-0.01556	0.68631	0.96089	0.06825	0.05269
ENST00000474245	AKAP10	STD	VM	-0.01886	0.4361	0.96586	0.06016	0.04129
ENST00000460046	AKAP10	STD	VL	-0.032	0.46336	0.96801	0.27953	0.24753
ENST00000474245	AKAP10	STM	VM	-0.00692	0.67657	0.97222	0.04821	0.04129
ENST00000225737	AKAP10	STD	VL	0.01086	0.54644	0.97754	0.64084	0.65171
ENST00000474245	AKAP10	STD	STM	-0.01195	0.26073	0.97879	0.06016	0.04821
ENST00000474245	AKAP10	STD	VL	-0.00063	0.62176	0.98296	0.06016	0.05953
ENST00000474245	AKAP10	RF	STD	0.00747	0.86832	0.98761	0.05269	0.06016
ENST00000474245	AKAP10	GR	VL	-0.00872	0.84658	0.99073	0.06825	0.05953
ENST00000225737	AKAP10	GL	RF	0.01647	0.72488	0.99416	0.63865	0.65512
ENST00000460046	AKAP10	GL	RF	0.01367	0.81497	0.99598	0.25645	0.27012
ENST00000474245	AKAP10	GL	RF	-0.02071	0.82821	0.99598	0.0734	0.05269
ENST00000474245	AKAP10	GL	GR	-0.00515	0.86133	0.99664	0.0734	0.06825
ENST00000225737	AKAP10	GL	STD	0.00219	0.98551	1	0.63865	0.64084
ENST00000460046	AKAP10	GL	STD	0.02308	0.70712	1	0.25645	0.27953
ENST00000474245	AKAP10	GL	STD	-0.01324	0.96783	1	0.0734	0.06016
ENST00000225737	AKAP10	GL	VL	0.01306	0.82983	1	0.63865	0.65171
ENST00000460046	AKAP10	GL	VL	-0.00892	0.86927	1	0.25645	0.24753
ENST00000474245	AKAP10	GL	VL	-0.01387	0.42278	1	0.0734	0.05953
ENST00000225737	AKAP10	GL	VM	-0.02441	0.34331	1	0.63865	0.61424
ENST00000460046	AKAP10	GL	VM	0.0712	0.12962	1	0.25645	0.32765
ENST00000474245	AKAP10	GL	VM	-0.03211	0.62262	1	0.0734	0.04129
ENST00000474245	AKAP10	GR	STD	-0.00809	0.86358	1	0.06825	0.06016
ENST00000225737	AKAP10	GR	STM	0.02794	0.29773	1	0.70885	0.73679
ENST00000460046	AKAP10	GR	STM	-0.02044	0.57751	1	0.1987	0.17826
ENST00000474245	AKAP10	GR	STM	-0.02004	0.20746	1	0.06825	0.04821
ENST00000225737	AKAP10	RF	VL	-0.00342	0.31492	1	0.65512	0.65171
ENST00000460046	AKAP10	RF	VL	-0.0226	0.36084	1	0.27012	0.24753
ENST00000474245	AKAP10	RF	VL	0.00684	0.79786	1	0.05269	0.05953
ENST00000225737	AKAP10	RF	VM	-0.04089	0.15455	1	0.65512	0.61424
ENST00000460046	AKAP10	RF	VM	0.05752	0.07745	1	0.27012	0.32765
ENST00000474245	AKAP10	RF	VM	-0.01139	0.58717	1	0.05269	0.04129
ENST00000225737	AKAP10	VL	VM	-0.03747	0.14128	1	0.65171	0.61424
ENST00000460046	AKAP10	VL	VM	0.08012	0.08685	1	0.24753	0.32765
ENST00000474245	AKAP10	VL	VM	-0.01824	0.33582	1	0.05953	0.04129
ENST00000652769	AL158152.1	GR	RF	-0.15936	1e-05	0.01109	0.6148	0.45544
ENST00000652769	AL158152.1	RF	STD	0.14846	0.0003	0.07606	0.45544	0.60389
ENST00000660581	AL158152.1	STM	VM	0.18689	0.0019	0.18149	0.22853	0.41541
ENST00000652769	AL158152.1	RF	STM	0.13225	0.00351	0.20663	0.45544	0.58768
ENST00000652769	AL158152.1	GR	VM	-0.13268	0.00234	0.21441	0.6148	0.48212
ENST00000660581	AL158152.1	RF	STM	-0.17404	0.00723	0.27517	0.40256	0.22853
ENST00000652769	AL158152.1	STD	VM	-0.12178	0.00353	0.34041	0.60389	0.48212
ENST00000660581	AL158152.1	GR	RF	0.12361	0.01595	0.35004	0.27895	0.40256
ENST00000660581	AL158152.1	GR	VM	0.13646	0.01226	0.39132	0.27895	0.41541
ENST00000652769	AL158152.1	STM	VM	-0.10557	0.02595	0.47587	0.58768	0.48212
ENST00000652620	AL158152.1	GR	VM	-0.03784	0.02486	0.48579	0.06025	0.02241
ENST00000602703	AL158152.1	RF	STD	-0.02271	0.04687	0.52422	0.0735	0.05079
ENST00000660581	AL158152.1	STD	VM	0.13557	0.01549	0.55323	0.27984	0.41541
ENST00000602703	AL158152.1	GR	RF	0.0275	0.06511	0.55427	0.046	0.0735
ENST00000660581	AL158152.1	RF	STD	-0.12272	0.06049	0.56275	0.40256	0.27984
ENST00000652769	AL158152.1	STD	VL	-0.08213	0.02439	0.59104	0.60389	0.52176
ENST00000652769	AL158152.1	GL	STD	0.09214	0.02109	0.60719	0.51175	0.60389
ENST00000660581	AL158152.1	GL	STM	-0.12652	0.01989	0.61857	0.35505	0.22853
ENST00000652769	AL158152.1	GR	VL	-0.09304	0.06829	0.6408	0.6148	0.52176
ENST00000652620	AL158152.1	STM	VM	-0.0629	0.07461	0.64714	0.08532	0.02241
ENST00000602703	AL158152.1	STD	STM	0.04753	0.02855	0.72563	0.05079	0.09832
ENST00000652769	AL158152.1	GL	GR	0.10305	0.07146	0.72641	0.51175	0.6148
ENST00000652620	AL158152.1	VL	VM	-0.10541	0.00263	0.7725	0.12782	0.02241
ENST00000602703	AL158152.1	STM	VL	-0.04743	0.20846	0.80118	0.09832	0.05088
ENST00000602703	AL158152.1	GR	VM	0.03218	0.18688	0.81948	0.046	0.07818
ENST00000652620	AL158152.1	STD	VM	-0.04301	0.1102	0.82943	0.06542	0.02241
ENST00000660581	AL158152.1	GL	GR	-0.0761	0.16195	0.83838	0.35505	0.27895
ENST00000602703	AL158152.1	STD	VM	0.02739	0.11803	0.83933	0.05079	0.07818
ENST00000652769	AL158152.1	STM	VL	-0.06592	0.26743	0.8402	0.58768	0.52176
ENST00000660581	AL158152.1	GL	STD	-0.07521	0.11141	0.84052	0.35505	0.27984
ENST00000602703	AL158152.1	GL	STD	-0.02201	0.11786	0.84532	0.0728	0.05079
ENST00000652620	AL158152.1	STD	VL	0.0624	0.13581	0.85694	0.06542	0.12782
ENST00000652620	AL158152.1	STM	VL	0.04251	0.30858	0.8657	0.08532	0.12782
ENST00000652769	AL158152.1	GL	STM	0.07593	0.13301	0.86931	0.51175	0.58768
ENST00000652620	AL158152.1	GR	VL	0.06757	0.31575	0.8866	0.06025	0.12782
ENST00000652769	AL158152.1	GL	RF	-0.05631	0.19123	0.89239	0.51175	0.45544
ENST00000652620	AL158152.1	GL	STM	0.02492	0.23955	0.92668	0.0604	0.08532
ENST00000602703	AL158152.1	GL	GR	-0.0268	0.38963	0.94203	0.0728	0.046
ENST00000660581	AL158152.1	VL	VM	0.11565	0.00904	0.94466	0.29976	0.41541
ENST00000602703	AL158152.1	STM	VM	-0.02014	0.58303	0.9527	0.09832	0.07818
ENST00000652620	AL158152.1	GR	RF	0.00825	0.63347	0.95386	0.06025	0.0685
ENST00000660581	AL158152.1	GR	VL	0.02081	0.57011	0.95437	0.27895	0.29976
ENST00000660581	AL158152.1	GL	RF	0.04751	0.40188	0.96179	0.35505	0.40256
ENST00000652620	AL158152.1	GL	GR	-0.00015	0.51798	0.96666	0.0604	0.06025
ENST00000660581	AL158152.1	RF	VL	-0.1028	0.0506	0.97163	0.40256	0.29976
ENST00000652620	AL158152.1	RF	STM	0.01682	0.70697	0.97248	0.0685	0.08532
ENST00000660581	AL158152.1	STM	VL	0.07124	0.75252	0.98083	0.22853	0.29976
ENST00000602703	AL158152.1	GL	STM	0.02552	0.51765	0.98302	0.0728	0.09832
ENST00000602703	AL158152.1	GR	VL	0.00488	0.79217	0.98569	0.046	0.05088
ENST00000660581	AL158152.1	STD	STM	-0.05132	0.34327	0.98732	0.27984	0.22853
ENST00000602703	AL158152.1	RF	STM	0.02482	0.82639	0.9899	0.0735	0.09832
ENST00000660581	AL158152.1	STD	VL	0.01992	0.73694	0.99097	0.27984	0.29976
ENST00000602703	AL158152.1	STD	VL	9e-05	0.83185	0.99641	0.05079	0.05088
ENST00000652620	AL158152.1	GL	RF	0.0081	0.86324	0.99734	0.0604	0.0685
ENST00000652620	AL158152.1	RF	STD	-0.00308	0.93731	0.99961	0.0685	0.06542
ENST00000602703	AL158152.1	GL	RF	0.0007	0.94616	1	0.0728	0.0735
ENST00000652620	AL158152.1	GL	STD	0.00502	0.84748	1	0.0604	0.06542
ENST00000652769	AL158152.1	GL	VL	0.01001	0.97887	1	0.51175	0.52176
ENST00000652620	AL158152.1	GL	VL	0.06742	0.25479	1	0.0604	0.12782
ENST00000602703	AL158152.1	GL	VL	-0.02192	0.40776	1	0.0728	0.05088
ENST00000660581	AL158152.1	GL	VL	-0.05529	0.2553	1	0.35505	0.29976
ENST00000652769	AL158152.1	GL	VM	-0.02963	0.58487	1	0.51175	0.48212
ENST00000652620	AL158152.1	GL	VM	-0.03799	0.16709	1	0.0604	0.02241
ENST00000602703	AL158152.1	GL	VM	0.00538	0.97576	1	0.0728	0.07818
ENST00000660581	AL158152.1	GL	VM	0.06036	0.42385	1	0.35505	0.41541
ENST00000652769	AL158152.1	GR	STD	-0.01091	0.75102	1	0.6148	0.60389
ENST00000652620	AL158152.1	GR	STD	0.00517	0.57321	1	0.06025	0.06542
ENST00000602703	AL158152.1	GR	STD	0.00479	0.74131	1	0.046	0.05079
ENST00000660581	AL158152.1	GR	STD	0.00089	0.92423	1	0.27895	0.27984
ENST00000652769	AL158152.1	GR	STM	-0.02712	0.41268	1	0.6148	0.58768
ENST00000652620	AL158152.1	GR	STM	0.02507	0.86618	1	0.06025	0.08532
ENST00000602703	AL158152.1	GR	STM	0.05232	0.04028	1	0.046	0.09832
ENST00000660581	AL158152.1	GR	STM	-0.05042	0.47394	1	0.27895	0.22853
ENST00000652769	AL158152.1	RF	VL	0.06633	0.26147	1	0.45544	0.52176
ENST00000652620	AL158152.1	RF	VL	0.05932	0.18277	1	0.0685	0.12782
ENST00000602703	AL158152.1	RF	VL	-0.02262	0.24386	1	0.0735	0.05088
ENST00000652769	AL158152.1	RF	VM	0.02668	0.64536	1	0.45544	0.48212
ENST00000652620	AL158152.1	RF	VM	-0.04609	0.1568	1	0.0685	0.02241
ENST00000602703	AL158152.1	RF	VM	0.00468	0.75841	1	0.0735	0.07818
ENST00000660581	AL158152.1	RF	VM	0.01285	0.86135	1	0.40256	0.41541
ENST00000652769	AL158152.1	STD	STM	-0.01621	0.92568	1	0.60389	0.58768
ENST00000652620	AL158152.1	STD	STM	0.01989	0.71615	1	0.06542	0.08532
ENST00000652769	AL158152.1	VL	VM	-0.03965	0.2828	1	0.52176	0.48212
ENST00000602703	AL158152.1	VL	VM	0.02729	0.50279	1	0.05088	0.07818
ENST00000395240	ALDOA	RF	STD	-0.11738	0	0	0.29206	0.17468
ENST00000412304	ALDOA	STD	VL	-0.1634	0	0.00118	0.47711	0.31371
ENST00000412304	ALDOA	STD	VM	-0.13987	0	0.00196	0.47711	0.33724
ENST00000412304	ALDOA	RF	STD	0.15786	1e-05	0.00662	0.31925	0.47711
ENST00000412304	ALDOA	STM	VL	-0.13266	0	0.00702	0.44637	0.31371
ENST00000395240	ALDOA	GR	RF	0.07346	1e-05	0.00913	0.2186	0.29206
ENST00000395240	ALDOA	STD	VL	0.09308	1e-05	0.00963	0.17468	0.26776
ENST00000395240	ALDOA	GL	STD	-0.07492	0	0.01031	0.2496	0.17468
ENST00000563987	ALDOA	GR	VL	-0.00591	2e-05	0.01517	0.01715	0.01124
ENST00000412304	ALDOA	GR	VL	-0.11534	2e-05	0.01645	0.42905	0.31371
ENST00000412304	ALDOA	RF	STM	0.12712	0.0001	0.0442	0.31925	0.44637
ENST00000563987	ALDOA	STM	VL	-0.00561	0.00012	0.04772	0.01684	0.01124
ENST00000563987	ALDOA	GR	RF	-0.00602	0.00021	0.05066	0.01715	0.01112
ENST00000412304	ALDOA	GR	RF	-0.1098	0.00037	0.0679	0.42905	0.31925
ENST00000412304	ALDOA	STM	VM	-0.10913	0.00024	0.07353	0.44637	0.33724
ENST00000563060	ALDOA	STM	VL	0.05538	0.00035	0.07898	0.19221	0.24759
ENST00000569798	ALDOA	STD	VM	0.03237	0.00015	0.07986	0.10468	0.13706
ENST00000563987	ALDOA	RF	STM	0.00572	0.00076	0.11237	0.01112	0.01684
ENST00000412304	ALDOA	GR	VM	-0.09181	0.0007	0.12188	0.42905	0.33724
ENST00000395240	ALDOA	RF	STM	-0.0848	0.00096	0.12299	0.29206	0.20726
ENST00000563987	ALDOA	STD	VL	-0.00508	0.00055	0.14665	0.01632	0.01124
ENST00000569798	ALDOA	STD	VL	0.02908	0.00102	0.19425	0.10468	0.13376
ENST00000563987	ALDOA	RF	STD	0.00519	0.00298	0.21305	0.01112	0.01632
ENST00000412304	ALDOA	GL	STD	0.10611	0.00173	0.25677	0.371	0.47711
ENST00000395240	ALDOA	GR	STD	-0.04392	0.00017	0.2703	0.2186	0.17468
ENST00000569798	ALDOA	GR	VM	0.02591	0.00673	0.32242	0.11115	0.13706
ENST00000569798	ALDOA	STM	VM	0.0248	0.00835	0.32735	0.11226	0.13706
ENST00000395240	ALDOA	GR	VL	0.04916	0.01139	0.3573	0.2186	0.26776
ENST00000569798	ALDOA	RF	STD	-0.02019	0.0132	0.36105	0.12488	0.10468
ENST00000563060	ALDOA	STM	VM	0.0592	0.01274	0.38063	0.19221	0.25141
ENST00000569798	ALDOA	GR	VL	0.02261	0.01554	0.40188	0.11115	0.13376
ENST00000563060	ALDOA	GR	VL	0.04909	0.01632	0.40972	0.1985	0.24759
ENST00000563060	ALDOA	GR	VM	0.05291	0.01843	0.43803	0.1985	0.25141
ENST00000569798	ALDOA	STM	VL	0.0215	0.02381	0.43889	0.11226	0.13376
ENST00000563987	ALDOA	GR	VM	-0.00386	0.02117	0.45982	0.01715	0.01329
ENST00000563987	ALDOA	STM	VM	-0.00355	0.0307	0.5029	0.01684	0.01329
ENST00000569798	ALDOA	GL	STD	-0.02327	0.01887	0.59768	0.12795	0.10468
ENST00000395240	ALDOA	STM	VL	0.0605	0.06609	0.61178	0.20726	0.26776
ENST00000569798	ALDOA	RF	STM	-0.01261	0.09615	0.63782	0.12488	0.11226
ENST00000569798	ALDOA	GR	RF	0.01373	0.10997	0.64939	0.11115	0.12488
ENST00000395240	ALDOA	GL	RF	0.04246	0.02858	0.66044	0.2496	0.29206
ENST00000563060	ALDOA	STD	VL	0.04185	0.04727	0.69379	0.20574	0.24759
ENST00000563060	ALDOA	STD	VM	0.04567	0.04038	0.6967	0.20574	0.25141
ENST00000395240	ALDOA	GL	GR	-0.031	0.05804	0.69737	0.2496	0.2186
ENST00000412304	ALDOA	GL	GR	0.05805	0.06989	0.72347	0.371	0.42905
ENST00000563987	ALDOA	GL	RF	-0.00307	0.06338	0.75363	0.0142	0.01112
ENST00000563060	ALDOA	RF	STM	-0.03473	0.19277	0.76847	0.22694	0.19221
ENST00000563987	ALDOA	STD	VM	-0.00302	0.07321	0.77048	0.01632	0.01329
ENST00000412304	ALDOA	GL	STM	0.07537	0.06728	0.78423	0.371	0.44637
ENST00000563987	ALDOA	GL	GR	0.00295	0.11649	0.79338	0.0142	0.01715
ENST00000569798	ALDOA	GL	GR	-0.0168	0.12083	0.79592	0.12795	0.11115
ENST00000395240	ALDOA	GL	STM	-0.04234	0.08244	0.80771	0.2496	0.20726
ENST00000412304	ALDOA	GL	RF	-0.05175	0.10087	0.81846	0.371	0.31925
ENST00000412304	ALDOA	GR	STD	0.04806	0.06238	0.85127	0.42905	0.47711
ENST00000395240	ALDOA	STD	VM	0.05855	0.14092	0.85978	0.17468	0.23324
ENST00000563060	ALDOA	GR	RF	0.02844	0.42514	0.89635	0.1985	0.22694
ENST00000563987	ALDOA	GL	STD	0.00212	0.21947	0.90681	0.0142	0.01632
ENST00000395240	ALDOA	STD	STM	0.03258	0.13952	0.91588	0.17468	0.20726
ENST00000569798	ALDOA	GL	STM	-0.01569	0.23694	0.92533	0.12795	0.11226
ENST00000563060	ALDOA	GL	VM	0.03656	0.06318	0.92892	0.21485	0.25141
ENST00000563987	ALDOA	GL	STM	0.00264	0.32029	0.94729	0.0142	0.01684
ENST00000395240	ALDOA	STM	VM	0.02597	0.57184	0.95065	0.20726	0.23324
ENST00000563060	ALDOA	RF	STD	-0.0212	0.6796	0.95561	0.22694	0.20574
ENST00000563060	ALDOA	STD	STM	-0.01353	0.20938	0.9615	0.20574	0.19221
ENST00000563060	ALDOA	GL	STM	-0.02264	0.43344	0.97024	0.21485	0.19221
ENST00000569798	ALDOA	STD	STM	0.00758	0.28557	0.98013	0.10468	0.11226
ENST00000563060	ALDOA	GL	RF	0.01209	0.55295	0.98091	0.21485	0.22694
ENST00000569798	ALDOA	GR	STD	-0.00647	0.27028	0.98502	0.11115	0.10468
ENST00000563060	ALDOA	GL	VL	0.03274	0.14231	0.99111	0.21485	0.24759
ENST00000412304	ALDOA	GL	VL	-0.05729	0.13737	0.99111	0.371	0.31371
ENST00000563060	ALDOA	GL	GR	-0.01635	0.7639	0.99151	0.21485	0.1985
ENST00000395240	ALDOA	GR	VM	0.01464	0.87002	0.99514	0.2186	0.23324
ENST00000412304	ALDOA	STD	STM	-0.03074	0.46104	0.99696	0.47711	0.44637
ENST00000569798	ALDOA	GL	RF	-0.00308	0.9258	1	0.12795	0.12488
ENST00000563060	ALDOA	GL	STD	-0.00911	0.80169	1	0.21485	0.20574
ENST00000563987	ALDOA	GL	VL	-0.00296	0.20273	1	0.0142	0.01124
ENST00000569798	ALDOA	GL	VL	0.00581	0.75843	1	0.12795	0.13376
ENST00000395240	ALDOA	GL	VL	0.01816	0.51511	1	0.2496	0.26776
ENST00000412304	ALDOA	GL	VM	-0.03376	0.29048	1	0.371	0.33724
ENST00000563987	ALDOA	GL	VM	-0.00091	0.63384	1	0.0142	0.01329
ENST00000569798	ALDOA	GL	VM	0.00911	0.34184	1	0.12795	0.13706
ENST00000395240	ALDOA	GL	VM	-0.01636	0.23506	1	0.2496	0.23324
ENST00000563060	ALDOA	GR	STD	0.00724	0.77576	1	0.1985	0.20574
ENST00000563987	ALDOA	GR	STD	-0.00083	0.54823	1	0.01715	0.01632
ENST00000563060	ALDOA	GR	STM	-0.00629	0.39318	1	0.1985	0.19221
ENST00000412304	ALDOA	GR	STM	0.01732	0.40458	1	0.42905	0.44637
ENST00000563987	ALDOA	GR	STM	-0.00031	0.97202	1	0.01715	0.01684
ENST00000569798	ALDOA	GR	STM	0.00111	0.98819	1	0.11115	0.11226
ENST00000395240	ALDOA	GR	STM	-0.01134	0.35762	1	0.2186	0.20726
ENST00000563060	ALDOA	RF	VL	0.02065	0.41866	1	0.22694	0.24759
ENST00000412304	ALDOA	RF	VL	-0.00554	0.93879	1	0.31925	0.31371
ENST00000563987	ALDOA	RF	VL	0.00011	0.94141	1	0.01112	0.01124
ENST00000569798	ALDOA	RF	VL	0.00889	0.34434	1	0.12488	0.13376
ENST00000395240	ALDOA	RF	VL	-0.0243	0.24323	1	0.29206	0.26776
ENST00000563060	ALDOA	RF	VM	0.02447	0.40805	1	0.22694	0.25141
ENST00000412304	ALDOA	RF	VM	0.01799	0.53611	1	0.31925	0.33724
ENST00000563987	ALDOA	RF	VM	0.00217	0.31278	1	0.01112	0.01329
ENST00000569798	ALDOA	RF	VM	0.01218	0.25622	1	0.12488	0.13706
ENST00000395240	ALDOA	RF	VM	-0.05883	0.07082	1	0.29206	0.23324
ENST00000563987	ALDOA	STD	STM	0.00053	0.51163	1	0.01632	0.01684
ENST00000563060	ALDOA	VL	VM	0.00382	0.84009	1	0.24759	0.25141
ENST00000412304	ALDOA	VL	VM	0.02353	0.53877	1	0.31371	0.33724
ENST00000563987	ALDOA	VL	VM	0.00206	0.30428	1	0.01124	0.01329
ENST00000569798	ALDOA	VL	VM	0.00329	0.79001	1	0.13376	0.13706
ENST00000395240	ALDOA	VL	VM	-0.03453	0.24442	1	0.26776	0.23324
ENST00000376156	ALG8	GL	STM	-0.24616	0	2e-05	0.34295	0.09679
ENST00000530608	ALG8	GR	RF	0.0595	0.00231	0.15617	0.01225	0.07175
ENST00000376156	ALG8	STM	VM	0.06739	0.00364	0.23335	0.09679	0.16418
ENST00000376156	ALG8	GL	GR	-0.16415	0.00245	0.28185	0.34295	0.1788
ENST00000376156	ALG8	GL	STD	-0.14958	0.00337	0.34208	0.34295	0.19337
ENST00000376156	ALG8	GL	VM	-0.17877	0.00039	0.34565	0.34295	0.16418
ENST00000615266	ALG8	GR	VM	0.03595	0.01345	0.40147	0.0274	0.06335
ENST00000531213	ALG8	GR	RF	0.02008	0.04761	0.50209	0.02855	0.04863
ENST00000376156	ALG8	RF	STM	-0.16565	0.04038	0.50267	0.26244	0.09679
ENST00000532552	ALG8	GL	RF	-0.03441	0.01037	0.52373	0.05585	0.02144
ENST00000299626	ALG8	GL	STM	0.19084	0.01167	0.54666	0.34505	0.53589
ENST00000530608	ALG8	GR	VL	0.03087	0.04229	0.55741	0.01225	0.04312
ENST00000376156	ALG8	GL	VL	-0.11619	0.00456	0.57696	0.34295	0.22676
ENST00000299626	ALG8	RF	STD	0.11556	0.06745	0.57858	0.42281	0.53837
ENST00000532552	ALG8	GL	VL	-0.03873	0.00611	0.61218	0.05585	0.01712
ENST00000376156	ALG8	STM	VL	0.12998	0.06846	0.61619	0.09679	0.22676
ENST00000299626	ALG8	GL	VM	0.21819	0.00643	0.65072	0.34505	0.56324
ENST00000299626	ALG8	GL	GR	0.18105	0.0442	0.66362	0.34505	0.5261
ENST00000615266	ALG8	GR	RF	0.02798	0.12056	0.66371	0.0274	0.05538
ENST00000531213	ALG8	RF	STD	-0.01468	0.1217	0.6752	0.04863	0.03395
ENST00000530910	ALG8	RF	STM	0.01128	0.12294	0.6831	0.05287	0.06416
ENST00000532552	ALG8	STD	VL	-0.02183	0.04664	0.68984	0.03895	0.01712
ENST00000376156	ALG8	RF	STD	-0.06907	0.13389	0.69196	0.26244	0.19337
ENST00000530910	ALG8	STM	VL	-0.01733	0.11267	0.69265	0.06416	0.04682
ENST00000532552	ALG8	RF	STM	0.02472	0.13581	0.70185	0.02144	0.04616
ENST00000532552	ALG8	STM	VL	-0.02904	0.11969	0.7041	0.04616	0.01712
ENST00000299626	ALG8	GL	STD	0.19332	0.04397	0.70625	0.34505	0.53837
ENST00000531213	ALG8	GL	RF	0.01387	0.04106	0.70719	0.03475	0.04863
ENST00000530608	ALG8	GL	RF	0.04235	0.04201	0.71209	0.0294	0.07175
ENST00000530608	ALG8	RF	VM	-0.05922	0.00366	0.71944	0.07175	0.01253
ENST00000299626	ALG8	GR	RF	-0.10329	0.16718	0.72475	0.5261	0.42281
ENST00000530910	ALG8	STD	STM	0.02126	0.03303	0.74838	0.04289	0.06416
ENST00000530608	ALG8	STD	VM	-0.01868	0.06309	0.74984	0.03121	0.01253
ENST00000615266	ALG8	GL	GR	-0.02565	0.09007	0.75879	0.05305	0.0274
ENST00000532552	ALG8	GL	GR	-0.01465	0.09195	0.7594	0.05585	0.0412
ENST00000530608	ALG8	GR	STD	0.01896	0.03088	0.77149	0.01225	0.03121
ENST00000529139	ALG8	STM	VL	-0.00206	0.1759	0.77382	0.01253	0.01047
ENST00000532552	ALG8	RF	STD	0.01751	0.23949	0.79373	0.02144	0.03895
ENST00000525755	ALG8	GR	VL	-0.02622	0.19627	0.81926	0.0284	0.00218
ENST00000532552	ALG8	GR	RF	-0.01976	0.27516	0.82278	0.0412	0.02144
ENST00000532552	ALG8	GL	VM	-0.03026	0.02238	0.83009	0.05585	0.02559
ENST00000376156	ALG8	GR	RF	0.08364	0.29068	0.83072	0.1788	0.26244
ENST00000532552	ALG8	STM	VM	-0.02057	0.23893	0.83543	0.04616	0.02559
ENST00000376156	ALG8	GL	RF	-0.08051	0.11643	0.83739	0.34295	0.26244
ENST00000531213	ALG8	RF	STM	-0.01063	0.33127	0.86129	0.04863	0.038
ENST00000529139	ALG8	RF	STM	0.00334	0.34318	0.86769	0.00919	0.01253
ENST00000530608	ALG8	RF	STM	-0.02201	0.36294	0.87791	0.07175	0.04974
ENST00000526849	ALG8	GL	STD	-0.00653	0.17406	0.88163	0.02795	0.02142
ENST00000376156	ALG8	STD	VL	0.0334	0.1665	0.88204	0.19337	0.22676
ENST00000531213	ALG8	GR	VL	0.02251	0.31267	0.8861	0.02855	0.05106
ENST00000530608	ALG8	GL	GR	-0.01715	0.26116	0.89555	0.0294	0.01225
ENST00000299626	ALG8	RF	STM	0.11308	0.42388	0.90255	0.42281	0.53589
ENST00000615266	ALG8	STM	VL	-0.03799	0.45206	0.91681	0.08358	0.04559
ENST00000531213	ALG8	STM	VL	0.01306	0.45681	0.91828	0.038	0.05106
ENST00000532552	ALG8	GR	VL	-0.02408	0.41381	0.9206	0.0412	0.01712
ENST00000526849	ALG8	GR	VL	-0.02538	0.42895	0.92556	0.0452	0.01982
ENST00000530608	ALG8	STM	VM	-0.03721	0.47625	0.92615	0.04974	0.01253
ENST00000530608	ALG8	RF	STD	-0.04054	0.54527	0.92731	0.07175	0.03121
ENST00000532552	ALG8	STD	VM	-0.01336	0.27229	0.92776	0.03895	0.02559
ENST00000530910	ALG8	RF	STD	-0.00998	0.58111	0.93626	0.05287	0.04289
ENST00000529139	ALG8	RF	STD	-3e-05	0.59115	0.93892	0.00919	0.00916
ENST00000615266	ALG8	GR	VL	0.01819	0.50128	0.93997	0.0274	0.04559
ENST00000525755	ALG8	GR	RF	-0.0194	0.59234	0.9436	0.0284	0.009
ENST00000525755	ALG8	GR	VM	-0.01811	0.49256	0.94475	0.0284	0.01029
ENST00000525755	ALG8	STM	VM	-0.00244	0.54235	0.94538	0.01274	0.01029
ENST00000615266	ALG8	GR	STD	0.02176	0.15695	0.94616	0.0274	0.04916
ENST00000526849	ALG8	STD	VM	0.00281	0.34993	0.94715	0.02142	0.02424
ENST00000525755	ALG8	STM	VL	-0.01056	0.55259	0.94747	0.01274	0.00218
ENST00000530910	ALG8	STM	VM	-0.00686	0.56355	0.94946	0.06416	0.05729
ENST00000530608	ALG8	GL	STD	0.00181	0.34751	0.94968	0.0294	0.03121
ENST00000526849	ALG8	GR	RF	-0.02833	0.62348	0.9516	0.0452	0.01688
ENST00000531213	ALG8	GL	STD	-0.0008	0.35874	0.9528	0.03475	0.03395
ENST00000530910	ALG8	STD	VM	0.0144	0.38048	0.9541	0.04289	0.05729
ENST00000526849	ALG8	RF	STD	0.00455	0.67563	0.95492	0.01688	0.02142
ENST00000531213	ALG8	GL	GR	-0.0062	0.44553	0.95501	0.03475	0.02855
ENST00000615266	ALG8	STM	VM	-0.02023	0.59967	0.95604	0.08358	0.06335
ENST00000525755	ALG8	GL	STD	-0.0095	0.38338	0.95731	0.01255	0.00305
ENST00000299626	ALG8	GL	VL	0.16342	0.09431	0.95847	0.34505	0.50847
ENST00000525755	ALG8	RF	STM	0.00374	0.64239	0.95855	0.009	0.01274
ENST00000530910	ALG8	GL	STM	0.01281	0.36606	0.95918	0.05135	0.06416
ENST00000526849	ALG8	STM	VL	0.00019	0.61407	0.95939	0.01963	0.01982
ENST00000532552	ALG8	GL	STM	-0.00969	0.37168	0.96046	0.05585	0.04616
ENST00000531213	ALG8	STD	VM	-0.00395	0.41865	0.96155	0.03395	0.03
ENST00000530910	ALG8	GR	VM	0.00194	0.60075	0.96403	0.05535	0.05729
ENST00000526849	ALG8	STM	VM	0.0046	0.6354	0.96584	0.01963	0.02424
ENST00000531213	ALG8	STM	VM	-0.008	0.64494	0.96759	0.038	0.03
ENST00000532552	ALG8	GR	VM	-0.01561	0.62879	0.96877	0.0412	0.02559
ENST00000376156	ALG8	GR	VL	0.04796	0.66358	0.97017	0.1788	0.22676
ENST00000615266	ALG8	STD	VM	0.0142	0.45813	0.97074	0.04916	0.06335
ENST00000529139	ALG8	STD	STM	0.00337	0.23168	0.97081	0.00916	0.01253
ENST00000529139	ALG8	GR	VL	-0.00128	0.6756	0.97168	0.01175	0.01047
ENST00000525755	ALG8	RF	STD	-0.00595	0.7685	0.9724	0.009	0.00305
ENST00000526849	ALG8	GL	VL	-0.00813	0.1085	0.97723	0.02795	0.01982
ENST00000530608	ALG8	GR	VM	0.00028	0.69574	0.97767	0.01225	0.01253
ENST00000525755	ALG8	GL	RF	-0.00355	0.52955	0.97812	0.01255	0.009
ENST00000532552	ALG8	GL	STD	-0.0169	0.52139	0.98225	0.05585	0.03895
ENST00000526849	ALG8	GL	RF	-0.01108	0.57374	0.98261	0.02795	0.01688
ENST00000529139	ALG8	STD	VL	0.00131	0.61945	0.98296	0.00916	0.01047
ENST00000531213	ALG8	GL	STM	0.00325	0.53809	0.98467	0.03475	0.038
ENST00000615266	ALG8	RF	STD	-0.00622	0.84793	0.98486	0.05538	0.04916
ENST00000615266	ALG8	STD	VL	-0.00357	0.66343	0.9858	0.04916	0.04559
ENST00000299626	ALG8	STD	VL	-0.0299	0.66667	0.98614	0.53837	0.50847
ENST00000376156	ALG8	GR	VM	-0.01462	0.78379	0.98656	0.1788	0.16418
ENST00000530608	ALG8	STM	VL	-0.00662	0.80877	0.98774	0.04974	0.04312
ENST00000526849	ALG8	RF	STM	0.00276	0.82178	0.98887	0.01688	0.01963
ENST00000299626	ALG8	GR	VM	0.03714	0.8074	0.98947	0.5261	0.56324
ENST00000526849	ALG8	GR	STD	-0.02378	0.30345	0.99067	0.0452	0.02142
ENST00000530910	ALG8	GL	RF	0.00152	0.66934	0.99095	0.05135	0.05287
ENST00000526849	ALG8	GL	GR	0.01725	0.76284	0.99144	0.02795	0.0452
ENST00000299626	ALG8	STD	VM	0.02487	0.66225	0.99175	0.53837	0.56324
ENST00000529139	ALG8	GR	VM	0.00013	0.83343	0.99258	0.01175	0.01188
ENST00000530910	ALG8	GR	RF	-0.00248	0.899	0.99268	0.05535	0.05287
ENST00000299626	ALG8	GR	VL	-0.01763	0.86723	0.99292	0.5261	0.50847
ENST00000530910	ALG8	GL	GR	0.004	0.78334	0.99293	0.05135	0.05535
ENST00000526849	ALG8	GL	STM	-0.00832	0.67169	0.99327	0.02795	0.01963
ENST00000529139	ALG8	GL	STM	0.00123	0.69742	0.99327	0.0113	0.01253
ENST00000525755	ALG8	GL	STM	0.00019	0.6788	0.99327	0.01255	0.01274
ENST00000525755	ALG8	STD	VL	-0.00088	0.77066	0.99348	0.00305	0.00218
ENST00000299626	ALG8	STM	VM	0.02734	0.87368	0.99387	0.53589	0.56324
ENST00000299626	ALG8	STM	VL	-0.02742	0.84193	0.99392	0.53589	0.50847
ENST00000376156	ALG8	STD	VM	-0.02919	0.70121	0.99416	0.19337	0.16418
ENST00000299626	ALG8	GL	RF	0.07776	0.78864	0.99512	0.34505	0.42281
ENST00000529139	ALG8	GL	RF	-0.00211	0.7822	0.99512	0.0113	0.00919
ENST00000529139	ALG8	GL	GR	0.00045	0.833	0.99552	0.0113	0.01175
ENST00000530910	ALG8	GR	VL	-0.00853	0.89126	0.99554	0.05535	0.04682
ENST00000530910	ALG8	STD	VL	0.00393	0.81771	0.99611	0.04289	0.04682
ENST00000531213	ALG8	GR	VM	0.00145	0.88184	0.99635	0.02855	0.03
ENST00000615266	ALG8	RF	STM	0.0282	0.88994	0.99678	0.05538	0.08358
ENST00000526849	ALG8	STD	VL	-0.0016	0.89065	0.99811	0.02142	0.01982
ENST00000525755	ALG8	GR	STD	-0.02535	0.4466	0.99872	0.0284	0.00305
ENST00000531213	ALG8	STD	VL	0.01711	0.91106	0.99979	0.03395	0.05106
ENST00000525755	ALG8	GL	GR	0.01585	0.98818	1	0.01255	0.0284
ENST00000615266	ALG8	GL	RF	0.00233	0.93143	1	0.05305	0.05538
ENST00000615266	ALG8	GL	STD	-0.00389	0.69968	1	0.05305	0.04916
ENST00000529139	ALG8	GL	STD	-0.00214	0.83951	1	0.0113	0.00916
ENST00000530910	ALG8	GL	STD	-0.00846	0.81613	1	0.05135	0.04289
ENST00000530608	ALG8	GL	STM	0.02034	0.96462	1	0.0294	0.04974
ENST00000615266	ALG8	GL	STM	0.03053	0.88495	1	0.05305	0.08358
ENST00000530608	ALG8	GL	VL	0.01372	0.19336	1	0.0294	0.04312
ENST00000531213	ALG8	GL	VL	0.01631	0.50857	1	0.03475	0.05106
ENST00000615266	ALG8	GL	VL	-0.00746	0.57665	1	0.05305	0.04559
ENST00000529139	ALG8	GL	VL	-0.00083	0.80933	1	0.0113	0.01047
ENST00000525755	ALG8	GL	VL	-0.01037	0.31496	1	0.01255	0.00218
ENST00000530910	ALG8	GL	VL	-0.00453	0.90099	1	0.05135	0.04682
ENST00000530608	ALG8	GL	VM	-0.01687	0.4295	1	0.0294	0.01253
ENST00000531213	ALG8	GL	VM	-0.00475	0.39415	1	0.03475	0.03
ENST00000526849	ALG8	GL	VM	-0.00371	0.62474	1	0.02795	0.02424
ENST00000615266	ALG8	GL	VM	0.0103	0.70558	1	0.05305	0.06335
ENST00000529139	ALG8	GL	VM	0.00058	0.6654	1	0.0113	0.01188
ENST00000525755	ALG8	GL	VM	-0.00226	0.40622	1	0.01255	0.01029
ENST00000530910	ALG8	GL	VM	0.00594	0.51117	1	0.05135	0.05729
ENST00000529139	ALG8	GR	RF	-0.00256	0.96076	1	0.01175	0.00919
ENST00000531213	ALG8	GR	STD	0.0054	0.59492	1	0.02855	0.03395
ENST00000299626	ALG8	GR	STD	0.01227	0.82797	1	0.5261	0.53837
ENST00000376156	ALG8	GR	STD	0.01457	0.76273	1	0.1788	0.19337
ENST00000532552	ALG8	GR	STD	-0.00225	0.70433	1	0.0412	0.03895
ENST00000529139	ALG8	GR	STD	-0.00259	0.88703	1	0.01175	0.00916
ENST00000530910	ALG8	GR	STD	-0.01246	0.53631	1	0.05535	0.04289
ENST00000530608	ALG8	GR	STM	0.03749	0.22808	1	0.01225	0.04974
ENST00000531213	ALG8	GR	STM	0.00945	0.38227	1	0.02855	0.038
ENST00000526849	ALG8	GR	STM	-0.02557	0.55746	1	0.0452	0.01963
ENST00000299626	ALG8	GR	STM	0.00979	0.97421	1	0.5261	0.53589
ENST00000376156	ALG8	GR	STM	-0.08201	0.05632	1	0.1788	0.09679
ENST00000532552	ALG8	GR	STM	0.00496	0.64592	1	0.0412	0.04616
ENST00000615266	ALG8	GR	STM	0.05618	0.15697	1	0.0274	0.08358
ENST00000529139	ALG8	GR	STM	0.00078	0.56617	1	0.01175	0.01253
ENST00000525755	ALG8	GR	STM	-0.01566	1	1	0.0284	0.01274
ENST00000530910	ALG8	GR	STM	0.00881	0.26989	1	0.05535	0.06416
ENST00000526849	ALG8	GR	VM	-0.02096	1	1	0.0452	0.02424
ENST00000530608	ALG8	RF	VL	-0.02863	0.35817	1	0.07175	0.04312
ENST00000531213	ALG8	RF	VL	0.00243	0.56672	1	0.04863	0.05106
ENST00000526849	ALG8	RF	VL	0.00295	0.54799	1	0.01688	0.01982
ENST00000299626	ALG8	RF	VL	0.08566	0.09811	1	0.42281	0.50847
ENST00000376156	ALG8	RF	VL	-0.03567	0.38644	1	0.26244	0.22676
ENST00000532552	ALG8	RF	VL	-0.00432	0.80263	1	0.02144	0.01712
ENST00000615266	ALG8	RF	VL	-0.00979	0.44371	1	0.05538	0.04559
ENST00000529139	ALG8	RF	VL	0.00128	0.29147	1	0.00919	0.01047
ENST00000525755	ALG8	RF	VL	-0.00682	0.55104	1	0.009	0.00218
ENST00000530910	ALG8	RF	VL	-0.00605	0.62616	1	0.05287	0.04682
ENST00000531213	ALG8	RF	VM	-0.01863	0.08795	1	0.04863	0.03
ENST00000526849	ALG8	RF	VM	0.00736	0.65608	1	0.01688	0.02424
ENST00000299626	ALG8	RF	VM	0.14042	0.12768	1	0.42281	0.56324
ENST00000376156	ALG8	RF	VM	-0.09826	0.38096	1	0.26244	0.16418
ENST00000532552	ALG8	RF	VM	0.00415	0.61993	1	0.02144	0.02559
ENST00000615266	ALG8	RF	VM	0.00798	0.54621	1	0.05538	0.06335
ENST00000529139	ALG8	RF	VM	0.00269	0.98863	1	0.00919	0.01188
ENST00000525755	ALG8	RF	VM	0.00129	0.88874	1	0.009	0.01029
ENST00000530910	ALG8	RF	VM	0.00442	0.71541	1	0.05287	0.05729
ENST00000530608	ALG8	STD	STM	0.01853	0.50354	1	0.03121	0.04974
ENST00000531213	ALG8	STD	STM	0.00405	0.86259	1	0.03395	0.038
ENST00000526849	ALG8	STD	STM	-0.00179	0.59825	1	0.02142	0.01963
ENST00000299626	ALG8	STD	STM	-0.00247	0.63044	1	0.53837	0.53589
ENST00000376156	ALG8	STD	STM	-0.09658	0.50365	1	0.19337	0.09679
ENST00000532552	ALG8	STD	STM	0.00721	0.54983	1	0.03895	0.04616
ENST00000615266	ALG8	STD	STM	0.03442	1	1	0.04916	0.08358
ENST00000525755	ALG8	STD	STM	0.00968	0.55271	1	0.00305	0.01274
ENST00000530608	ALG8	STD	VL	0.01191	0.96673	1	0.03121	0.04312
ENST00000529139	ALG8	STD	VM	0.00272	0.88721	1	0.00916	0.01188
ENST00000525755	ALG8	STD	VM	0.00724	1	1	0.00305	0.01029
ENST00000529139	ALG8	STM	VM	-0.00064	1	1	0.01253	0.01188
ENST00000530608	ALG8	VL	VM	-0.03059	0.05436	1	0.04312	0.01253
ENST00000531213	ALG8	VL	VM	-0.02106	0.17131	1	0.05106	0.03
ENST00000526849	ALG8	VL	VM	0.00441	0.39198	1	0.01982	0.02424
ENST00000299626	ALG8	VL	VM	0.05476	0.44348	1	0.50847	0.56324
ENST00000376156	ALG8	VL	VM	-0.06259	0.47964	1	0.22676	0.16418
ENST00000532552	ALG8	VL	VM	0.00847	0.49186	1	0.01712	0.02559
ENST00000615266	ALG8	VL	VM	0.01776	0.38981	1	0.04559	0.06335
ENST00000529139	ALG8	VL	VM	0.00141	0.89593	1	0.01047	0.01188
ENST00000525755	ALG8	VL	VM	0.00812	0.74813	1	0.00218	0.01029
ENST00000530910	ALG8	VL	VM	0.01047	0.68191	1	0.04682	0.05729
ENST00000618960	AXIN2	STM	VM	0.27393	1e-05	0.01186	0.16095	0.43488
ENST00000307078	AXIN2	STM	VM	-0.19858	0.00226	0.19205	0.51905	0.32047
ENST00000618960	AXIN2	RF	VM	0.29588	1e-05	0.19677	0.139	0.43488
ENST00000580513	AXIN2	STM	VM	-0.0499	0.00743	0.31159	0.14032	0.09041
ENST00000618960	AXIN2	GR	VM	0.20473	0.00648	0.31935	0.23015	0.43488
ENST00000580513	AXIN2	RF	STM	0.03775	0.02166	0.41357	0.10256	0.14032
ENST00000307078	AXIN2	GR	RF	0.08757	0.03862	0.47252	0.4293	0.51687
ENST00000580513	AXIN2	STM	VL	-0.03379	0.03275	0.48698	0.14032	0.10653
ENST00000618960	AXIN2	STD	VM	0.14783	0.01061	0.49317	0.28705	0.43488
ENST00000618960	AXIN2	VL	VM	0.21088	0.00048	0.49918	0.224	0.43488
ENST00000618960	AXIN2	RF	STD	0.14805	0.04183	0.50284	0.139	0.28705
ENST00000611991	AXIN2	GL	STD	-0.02027	0.01147	0.52006	0.05385	0.03358
ENST00000585045	AXIN2	STD	VM	-0.01364	0.01304	0.52398	0.01753	0.00388
ENST00000375702	AXIN2	STM	VL	0.07949	0.05904	0.59108	0.12516	0.20465
ENST00000307078	AXIN2	STM	VL	-0.1107	0.0644	0.60769	0.51905	0.40835
ENST00000580513	AXIN2	GL	STM	0.04157	0.01897	0.60996	0.09875	0.14032
ENST00000611991	AXIN2	RF	STD	-0.01542	0.08577	0.61806	0.049	0.03358
ENST00000580513	AXIN2	STD	STM	0.03889	0.01284	0.63103	0.10142	0.14032
ENST00000611991	AXIN2	GL	STM	-0.01743	0.02187	0.63454	0.05385	0.03642
ENST00000307078	AXIN2	GR	VM	-0.10883	0.07613	0.67576	0.4293	0.32047
ENST00000307078	AXIN2	RF	VM	-0.1964	0.00163	0.68951	0.51687	0.32047
ENST00000618960	AXIN2	GL	VM	0.20113	0.00975	0.69744	0.23375	0.43488
ENST00000307078	AXIN2	GL	RF	0.08337	0.0429	0.71369	0.4335	0.51687
ENST00000580513	AXIN2	GR	VM	-0.03289	0.09237	0.71383	0.1233	0.09041
ENST00000618960	AXIN2	GR	RF	-0.09115	0.16156	0.72024	0.23015	0.139
ENST00000585045	AXIN2	STD	STM	-0.00979	0.02807	0.72521	0.01753	0.00774
ENST00000580513	AXIN2	GR	RF	-0.02074	0.17922	0.73833	0.1233	0.10256
ENST00000307078	AXIN2	RF	STD	-0.07861	0.18487	0.74908	0.51687	0.43826
ENST00000611991	AXIN2	RF	STM	-0.01258	0.1924	0.76847	0.049	0.03642
ENST00000307078	AXIN2	STD	VM	-0.11779	0.08294	0.78834	0.43826	0.32047
ENST00000375702	AXIN2	STD	VL	0.0948	0.08639	0.79111	0.10984	0.20465
ENST00000375702	AXIN2	GR	VL	0.05495	0.18983	0.81335	0.1497	0.20465
ENST00000585045	AXIN2	GR	RF	0.0032	0.2692	0.82056	0.0063	0.0095
ENST00000307078	AXIN2	GL	STM	0.08555	0.09118	0.82152	0.4335	0.51905
ENST00000375702	AXIN2	GR	VM	-0.05288	0.2005	0.82804	0.1497	0.09682
ENST00000618960	AXIN2	STD	VL	-0.06305	0.11372	0.82878	0.28705	0.224
ENST00000580513	AXIN2	GR	VL	-0.01677	0.22316	0.83565	0.1233	0.10653
ENST00000580513	AXIN2	GL	GR	0.02455	0.17218	0.84658	0.09875	0.1233
ENST00000580513	AXIN2	GR	STD	-0.02188	0.05962	0.84866	0.1233	0.10142
ENST00000618960	AXIN2	RF	STM	0.02195	0.31401	0.85148	0.139	0.16095
ENST00000585045	AXIN2	GL	RF	0.00205	0.1516	0.8695	0.00745	0.0095
ENST00000578251	AXIN2	GL	GR	-0.0074	0.21541	0.87135	0.01915	0.01175
ENST00000611991	AXIN2	STD	VM	0.00989	0.1589	0.87288	0.03358	0.04347
ENST00000611991	AXIN2	GR	VL	-0.01591	0.28343	0.87604	0.04885	0.03294
ENST00000375702	AXIN2	GL	RF	0.01916	0.16199	0.87667	0.15365	0.17281
ENST00000611991	AXIN2	GL	VL	-0.02091	0.05255	0.88325	0.05385	0.03294
ENST00000611991	AXIN2	STM	VM	0.00705	0.34035	0.88337	0.03642	0.04347
ENST00000611991	AXIN2	GL	GR	-0.005	0.2415	0.88548	0.05385	0.04885
ENST00000618960	AXIN2	GL	RF	-0.09475	0.20321	0.90077	0.23375	0.139
ENST00000585045	AXIN2	GR	STD	0.01123	0.09145	0.90326	0.0063	0.01753
ENST00000611991	AXIN2	GR	STD	-0.01527	0.1088	0.91513	0.04885	0.03358
ENST00000585045	AXIN2	RF	STM	-0.00176	0.46818	0.91629	0.0095	0.00774
ENST00000578251	AXIN2	GR	RF	-0.00131	0.48741	0.91955	0.01175	0.01044
ENST00000618960	AXIN2	STM	VL	0.06305	0.47235	0.92329	0.16095	0.224
ENST00000618960	AXIN2	GR	VL	-0.00615	0.42889	0.92556	0.23015	0.224
ENST00000375702	AXIN2	GL	STD	-0.04381	0.2768	0.92573	0.15365	0.10984
ENST00000585045	AXIN2	RF	STD	0.00803	0.5445	0.92731	0.0095	0.01753
ENST00000375702	AXIN2	RF	STD	-0.06297	0.55578	0.92981	0.17281	0.10984
ENST00000578251	AXIN2	STD	VM	-0.00236	0.30438	0.93605	0.01195	0.00959
ENST00000611991	AXIN2	GL	RF	-0.00485	0.30845	0.93657	0.05385	0.049
ENST00000375702	AXIN2	RF	STM	-0.04765	0.55905	0.94137	0.17281	0.12516
ENST00000580513	AXIN2	GL	STD	0.00267	0.31652	0.94198	0.09875	0.10142
ENST00000375702	AXIN2	GL	STM	-0.02849	0.33147	0.94742	0.15365	0.12516
ENST00000585045	AXIN2	STM	VM	-0.00385	0.56914	0.94986	0.00774	0.00388
ENST00000585045	AXIN2	GL	STD	0.01008	0.37922	0.95698	0.00745	0.01753
ENST00000375702	AXIN2	GR	RF	0.02311	0.67673	0.95999	0.1497	0.17281
ENST00000307078	AXIN2	RF	VL	-0.10852	0.04043	0.96009	0.51687	0.40835
ENST00000618960	AXIN2	GL	STD	0.0533	0.42681	0.96576	0.23375	0.28705
ENST00000375702	AXIN2	STM	VM	-0.02833	0.67317	0.9717	0.12516	0.09682
ENST00000611991	AXIN2	STM	VL	-0.00348	0.69012	0.97247	0.03642	0.03294
ENST00000578251	AXIN2	GL	STM	-0.00841	0.46426	0.97349	0.01915	0.01074
ENST00000585045	AXIN2	GR	VL	0.00882	0.68942	0.97369	0.0063	0.01512
ENST00000375702	AXIN2	GR	STD	-0.03986	0.23015	0.97635	0.1497	0.10984
ENST00000585045	AXIN2	GR	VM	-0.00242	0.69427	0.9774	0.0063	0.00388
ENST00000618960	AXIN2	STD	STM	-0.12611	0.25691	0.9787	0.28705	0.16095
ENST00000578251	AXIN2	STM	VM	-0.00115	0.75042	0.97881	0.01074	0.00959
ENST00000578251	AXIN2	GR	VL	-0.0034	0.7513	0.98037	0.01175	0.00835
ENST00000578251	AXIN2	STM	VL	-0.00238	0.76924	0.98175	0.01074	0.00835
ENST00000307078	AXIN2	GR	VL	-0.02095	0.76984	0.9827	0.4293	0.40835
ENST00000578251	AXIN2	STD	VL	-0.00359	0.64859	0.9834	0.01195	0.00835
ENST00000307078	AXIN2	STD	STM	0.08079	0.30685	0.98444	0.43826	0.51905
ENST00000580513	AXIN2	RF	STD	-0.00114	0.85114	0.98521	0.10256	0.10142
ENST00000578251	AXIN2	RF	STD	0.00151	0.8525	0.98534	0.01044	0.01195
ENST00000580513	AXIN2	STD	VL	0.00511	0.67474	0.98692	0.10142	0.10653
ENST00000618960	AXIN2	GL	STM	-0.0728	0.59585	0.98757	0.23375	0.16095
ENST00000578251	AXIN2	GL	RF	-0.00871	0.62638	0.9883	0.01915	0.01044
ENST00000578251	AXIN2	GL	STD	-0.0072	0.59295	0.99053	0.01915	0.01195
ENST00000580513	AXIN2	STD	VM	-0.01101	0.65383	0.99054	0.10142	0.09041
ENST00000375702	AXIN2	GL	GR	-0.00395	0.75628	0.99082	0.15365	0.1497
ENST00000307078	AXIN2	STD	VL	-0.02991	0.82144	0.99611	0.43826	0.40835
ENST00000578251	AXIN2	GR	STD	0.0002	0.407	0.9976	0.01175	0.01195
ENST00000578251	AXIN2	GR	VM	-0.00216	0.89462	0.99818	0.01175	0.00959
ENST00000307078	AXIN2	GL	GR	-0.0042	0.91265	1	0.4335	0.4293
ENST00000618960	AXIN2	GL	GR	-0.0036	1	1	0.23375	0.23015
ENST00000585045	AXIN2	GL	GR	-0.00115	0.91991	1	0.00745	0.0063
ENST00000580513	AXIN2	GL	RF	0.00381	0.9565	1	0.09875	0.10256
ENST00000307078	AXIN2	GL	STD	0.00476	0.9758	1	0.4335	0.43826
ENST00000585045	AXIN2	GL	STM	0.00029	0.97021	1	0.00745	0.00774
ENST00000307078	AXIN2	GL	VL	-0.02515	0.5846	1	0.4335	0.40835
ENST00000618960	AXIN2	GL	VL	-0.00975	0.54706	1	0.23375	0.224
ENST00000375702	AXIN2	GL	VL	0.051	0.50187	1	0.15365	0.20465
ENST00000578251	AXIN2	GL	VL	-0.0108	0.15918	1	0.01915	0.00835
ENST00000580513	AXIN2	GL	VL	0.00778	0.83527	1	0.09875	0.10653
ENST00000585045	AXIN2	GL	VL	0.00767	0.44507	1	0.00745	0.01512
ENST00000307078	AXIN2	GL	VM	-0.11303	0.12136	1	0.4335	0.32047
ENST00000611991	AXIN2	GL	VM	-0.01038	0.50137	1	0.05385	0.04347
ENST00000375702	AXIN2	GL	VM	-0.05683	0.12965	1	0.15365	0.09682
ENST00000578251	AXIN2	GL	VM	-0.00956	0.23077	1	0.01915	0.00959
ENST00000580513	AXIN2	GL	VM	-0.00834	0.7802	1	0.09875	0.09041
ENST00000585045	AXIN2	GL	VM	-0.00357	0.45949	1	0.00745	0.00388
ENST00000611991	AXIN2	GR	RF	0.00015	1	1	0.04885	0.049
ENST00000307078	AXIN2	GR	STD	0.00896	0.8433	1	0.4293	0.43826
ENST00000618960	AXIN2	GR	STD	0.0569	0.5381	1	0.23015	0.28705
ENST00000307078	AXIN2	GR	STM	0.08975	0.05273	1	0.4293	0.51905
ENST00000611991	AXIN2	GR	STM	-0.01243	0.08949	1	0.04885	0.03642
ENST00000618960	AXIN2	GR	STM	-0.0692	0.43928	1	0.23015	0.16095
ENST00000375702	AXIN2	GR	STM	-0.02454	0.50449	1	0.1497	0.12516
ENST00000578251	AXIN2	GR	STM	-0.00101	0.57636	1	0.01175	0.01074
ENST00000580513	AXIN2	GR	STM	0.01702	0.23144	1	0.1233	0.14032
ENST00000585045	AXIN2	GR	STM	0.00144	0.68699	1	0.0063	0.00774
ENST00000611991	AXIN2	GR	VM	-0.00538	0.94747	1	0.04885	0.04347
ENST00000307078	AXIN2	RF	STM	0.00218	0.96098	1	0.51687	0.51905
ENST00000578251	AXIN2	RF	STM	0.0003	0.96045	1	0.01044	0.01074
ENST00000611991	AXIN2	RF	VL	-0.01606	0.11965	1	0.049	0.03294
ENST00000618960	AXIN2	RF	VL	0.085	0.7233	1	0.139	0.224
ENST00000375702	AXIN2	RF	VL	0.03183	0.20764	1	0.17281	0.20465
ENST00000578251	AXIN2	RF	VL	-0.00208	0.51819	1	0.01044	0.00835
ENST00000580513	AXIN2	RF	VL	0.00397	0.76043	1	0.10256	0.10653
ENST00000585045	AXIN2	RF	VL	0.00562	0.63476	1	0.0095	0.01512
ENST00000611991	AXIN2	RF	VM	-0.00553	1	1	0.049	0.04347
ENST00000375702	AXIN2	RF	VM	-0.07599	0.73006	1	0.17281	0.09682
ENST00000578251	AXIN2	RF	VM	-0.00085	0.4089	1	0.01044	0.00959
ENST00000580513	AXIN2	RF	VM	-0.01215	0.6765	1	0.10256	0.09041
ENST00000585045	AXIN2	RF	VM	-0.00562	0.09652	1	0.0095	0.00388
ENST00000611991	AXIN2	STD	STM	0.00284	0.91315	1	0.03358	0.03642
ENST00000375702	AXIN2	STD	STM	0.01532	0.65909	1	0.10984	0.12516
ENST00000578251	AXIN2	STD	STM	-0.00121	0.7784	1	0.01195	0.01074
ENST00000611991	AXIN2	STD	VL	-0.00064	0.91921	1	0.03358	0.03294
ENST00000585045	AXIN2	STD	VL	-0.00241	0.9511	1	0.01753	0.01512
ENST00000375702	AXIN2	STD	VM	-0.01302	0.92992	1	0.10984	0.09682
ENST00000585045	AXIN2	STM	VL	0.00738	0.9455	1	0.00774	0.01512
ENST00000307078	AXIN2	VL	VM	-0.08788	0.2422	1	0.40835	0.32047
ENST00000611991	AXIN2	VL	VM	0.01053	0.19788	1	0.03294	0.04347
ENST00000375702	AXIN2	VL	VM	-0.10782	0.03476	1	0.20465	0.09682
ENST00000578251	AXIN2	VL	VM	0.00124	0.52432	1	0.00835	0.00959
ENST00000580513	AXIN2	VL	VM	-0.01612	0.80283	1	0.10653	0.09041
ENST00000585045	AXIN2	VL	VM	-0.01124	0.32183	1	0.01512	0.00388
ENST00000270233	BCAM	STM	VL	-0.12903	0	0.00328	0.73426	0.60524
ENST00000611077	BCAM	STM	VL	0.11235	2e-05	0.01833	0.19795	0.31029
ENST00000589558	BCAM	GR	RF	0.0223	6e-05	0.02431	0.02845	0.05075
ENST00000589558	BCAM	RF	STM	-0.02064	0.00027	0.07068	0.05075	0.03011
ENST00000270233	BCAM	RF	STM	0.10201	0.00034	0.0787	0.63225	0.73426
ENST00000270233	BCAM	STM	VM	-0.09185	0.00112	0.15184	0.73426	0.64241
ENST00000589558	BCAM	GR	VM	0.01467	0.00164	0.17998	0.02845	0.04312
ENST00000611077	BCAM	STD	VL	0.08661	0.00171	0.24116	0.22368	0.31029
ENST00000270233	BCAM	STD	VL	-0.08582	0.00205	0.25974	0.69105	0.60524
ENST00000270233	BCAM	GR	VL	-0.09796	0.01098	0.35236	0.7032	0.60524
ENST00000611077	BCAM	STM	VM	0.06611	0.01172	0.37133	0.19795	0.26406
ENST00000589558	BCAM	RF	STD	-0.0138	0.01558	0.37457	0.05075	0.03695
ENST00000589558	BCAM	STM	VM	0.01301	0.01503	0.40295	0.03011	0.04312
ENST00000611077	BCAM	RF	STM	-0.0598	0.02276	0.42185	0.25775	0.19795
ENST00000589558	BCAM	GR	VL	0.01084	0.02262	0.45714	0.02845	0.03929
ENST00000270233	BCAM	RF	STD	0.0588	0.04356	0.50885	0.63225	0.69105
ENST00000588303	BCAM	GR	RF	0.00682	0.05258	0.51786	0.01255	0.01938
ENST00000588303	BCAM	RF	STM	-0.00753	0.06105	0.56693	0.01938	0.01184
ENST00000270233	BCAM	GR	RF	-0.07095	0.07161	0.57232	0.7032	0.63225
ENST00000611077	BCAM	GR	VL	0.08074	0.04804	0.57764	0.22955	0.31029
ENST00000589558	BCAM	STM	VL	0.00919	0.06636	0.61207	0.03011	0.03929
ENST00000589558	BCAM	GL	RF	0.0154	0.03818	0.69566	0.03535	0.05075
ENST00000588303	BCAM	STM	VM	0.00328	0.10335	0.70229	0.01184	0.01512
ENST00000589558	BCAM	GL	GR	-0.0069	0.07297	0.73024	0.03535	0.02845
ENST00000270233	BCAM	GR	VM	-0.06079	0.12982	0.76301	0.7032	0.64241
ENST00000611077	BCAM	RF	STD	-0.03407	0.24857	0.80092	0.25775	0.22368
ENST00000588303	BCAM	RF	STD	-0.00422	0.25419	0.80502	0.01938	0.01516
ENST00000270233	BCAM	STD	VM	-0.04864	0.11476	0.83455	0.69105	0.64241
ENST00000588303	BCAM	GL	STM	-0.00301	0.10486	0.84154	0.01485	0.01184
ENST00000270233	BCAM	GL	STM	0.06436	0.11527	0.85677	0.6699	0.73426
ENST00000588303	BCAM	GL	VL	-0.00291	0.04139	0.86519	0.01485	0.01194
ENST00000588303	BCAM	GR	VM	0.00257	0.27179	0.87543	0.01255	0.01512
ENST00000589558	BCAM	STD	VM	0.00617	0.17163	0.88069	0.03695	0.04312
ENST00000589558	BCAM	GR	STD	0.0085	0.07738	0.88106	0.02845	0.03695
ENST00000611077	BCAM	GL	STM	-0.05695	0.15239	0.88418	0.2549	0.19795
ENST00000270233	BCAM	STD	STM	0.04321	0.10105	0.88529	0.69105	0.73426
ENST00000611077	BCAM	STD	VM	0.04037	0.18361	0.89015	0.22368	0.26406
ENST00000611077	BCAM	GR	RF	0.0282	0.41361	0.89229	0.22955	0.25775
ENST00000611077	BCAM	GR	VM	0.03451	0.31193	0.89233	0.22955	0.26406
ENST00000589558	BCAM	GL	STM	-0.00524	0.18247	0.89831	0.03535	0.03011
ENST00000588303	BCAM	GL	GR	-0.0023	0.27669	0.90311	0.01485	0.01255
ENST00000270233	BCAM	GL	GR	0.0333	0.38958	0.94203	0.6699	0.7032
ENST00000270233	BCAM	GL	RF	-0.03765	0.35354	0.95084	0.6699	0.63225
ENST00000588303	BCAM	GL	RF	0.00452	0.36192	0.95317	0.01485	0.01938
ENST00000588303	BCAM	RF	VL	-0.00743	0.03887	0.95377	0.01938	0.01194
ENST00000588303	BCAM	STD	VL	-0.00322	0.39546	0.95486	0.01516	0.01194
ENST00000611077	BCAM	GL	GR	-0.02535	0.45155	0.95551	0.2549	0.22955
ENST00000589558	BCAM	STD	STM	-0.00684	0.19645	0.95679	0.03695	0.03011
ENST00000588303	BCAM	STM	VL	0.0001	0.6533	0.96703	0.01184	0.01194
ENST00000611077	BCAM	GL	STD	-0.03122	0.43515	0.96742	0.2549	0.22368
ENST00000611077	BCAM	STD	STM	-0.02574	0.23706	0.97201	0.22368	0.19795
ENST00000588303	BCAM	GR	VL	-0.00061	0.67739	0.9721	0.01255	0.01194
ENST00000588303	BCAM	STD	STM	-0.00332	0.23897	0.97232	0.01516	0.01184
ENST00000589558	BCAM	STD	VL	0.00235	0.57455	0.97916	0.03695	0.03929
ENST00000270233	BCAM	GL	STD	0.02115	0.53584	0.98236	0.6699	0.69105
ENST00000611077	BCAM	RF	VL	0.05254	0.06143	0.98766	0.25775	0.31029
ENST00000611077	BCAM	GL	VL	0.05539	0.13294	0.99038	0.2549	0.31029
ENST00000588303	BCAM	GL	STD	0.00031	0.60857	0.99337	0.01485	0.01516
ENST00000611077	BCAM	GL	RF	0.00285	0.74789	0.99434	0.2549	0.25775
ENST00000588303	BCAM	STD	VM	-4e-05	0.76987	0.99528	0.01516	0.01512
ENST00000588303	BCAM	GR	STD	0.00261	0.4324	0.99872	0.01255	0.01516
ENST00000589558	BCAM	GL	STD	0.0016	0.9418	1	0.03535	0.03695
ENST00000270233	BCAM	GL	VL	-0.06466	0.19587	1	0.6699	0.60524
ENST00000589558	BCAM	GL	VL	0.00394	0.85049	1	0.03535	0.03929
ENST00000270233	BCAM	GL	VM	-0.02749	0.56156	1	0.6699	0.64241
ENST00000611077	BCAM	GL	VM	0.00916	0.71432	1	0.2549	0.26406
ENST00000588303	BCAM	GL	VM	0.00027	0.79245	1	0.01485	0.01512
ENST00000589558	BCAM	GL	VM	0.00777	0.19239	1	0.03535	0.04312
ENST00000270233	BCAM	GR	STD	-0.01215	0.71473	1	0.7032	0.69105
ENST00000611077	BCAM	GR	STD	-0.00587	0.85974	1	0.22955	0.22368
ENST00000270233	BCAM	GR	STM	0.03106	0.34604	1	0.7032	0.73426
ENST00000611077	BCAM	GR	STM	-0.0316	0.50954	1	0.22955	0.19795
ENST00000588303	BCAM	GR	STM	-0.00071	0.77741	1	0.01255	0.01184
ENST00000589558	BCAM	GR	STM	0.00166	0.72922	1	0.02845	0.03011
ENST00000270233	BCAM	RF	VL	-0.02701	0.21518	1	0.63225	0.60524
ENST00000589558	BCAM	RF	VL	-0.01146	0.26425	1	0.05075	0.03929
ENST00000270233	BCAM	RF	VM	0.01016	0.71884	1	0.63225	0.64241
ENST00000611077	BCAM	RF	VM	0.00631	0.9055	1	0.25775	0.26406
ENST00000588303	BCAM	RF	VM	-0.00426	0.42217	1	0.01938	0.01512
ENST00000589558	BCAM	RF	VM	-0.00763	0.15516	1	0.05075	0.04312
ENST00000270233	BCAM	VL	VM	0.03718	0.06494	1	0.60524	0.64241
ENST00000611077	BCAM	VL	VM	-0.04624	0.0436	1	0.31029	0.26406
ENST00000588303	BCAM	VL	VM	0.00318	0.17082	1	0.01194	0.01512
ENST00000589558	BCAM	VL	VM	0.00382	0.86047	1	0.03929	0.04312
ENST00000666544	BX284668.5	GR	VL	0.1672	1e-05	0.01237	0.17115	0.33835
ENST00000666544	BX284668.5	GL	GR	-0.1912	6e-05	0.05879	0.36235	0.17115
ENST00000666544	BX284668.5	GR	VM	0.15273	0.00064	0.11715	0.17115	0.32388
ENST00000666544	BX284668.5	STM	VL	0.12967	0.00201	0.17089	0.20868	0.33835
ENST00000666544	BX284668.5	GR	RF	0.11829	0.00427	0.20882	0.17115	0.28944
ENST00000660464	BX284668.5	GL	STM	0.12568	0.00092	0.24087	0.0829	0.20858
ENST00000666544	BX284668.5	GL	STM	-0.15367	0.00113	0.26763	0.36235	0.20868
ENST00000666544	BX284668.5	STM	VM	0.1152	0.00593	0.2831	0.20868	0.32388
ENST00000654227	BX284668.5	GR	VL	-0.10394	0.00894	0.325	0.21235	0.10841
ENST00000660464	BX284668.5	GL	GR	0.1375	0.00473	0.35908	0.0829	0.2204
ENST00000666544	BX284668.5	RF	STM	-0.08075	0.04355	0.5142	0.28944	0.20868
ENST00000654227	BX284668.5	STM	VL	-0.0889	0.05061	0.55891	0.19732	0.10841
ENST00000666544	BX284668.5	GR	STD	0.09517	0.00679	0.57277	0.17115	0.26632
ENST00000660464	BX284668.5	GL	STD	0.09452	0.01979	0.60126	0.0829	0.17742
ENST00000422124	BX284668.5	STD	VM	-0.07435	0.02188	0.60869	0.144	0.06965
ENST00000666544	BX284668.5	STD	VL	0.07204	0.03608	0.6607	0.26632	0.33835
ENST00000660464	BX284668.5	STM	VM	-0.07993	0.09119	0.68009	0.20858	0.12865
ENST00000660464	BX284668.5	GL	RF	0.08216	0.05591	0.74425	0.0829	0.16506
ENST00000660464	BX284668.5	GR	VM	-0.09175	0.13413	0.76897	0.2204	0.12865
ENST00000422124	BX284668.5	STM	VM	-0.03746	0.16483	0.77569	0.10711	0.06965
ENST00000671472	BX284668.5	GR	RF	-0.01461	0.21993	0.78216	0.03755	0.02294
ENST00000666544	BX284668.5	GL	STD	-0.09603	0.07165	0.78647	0.36235	0.26632
ENST00000422124	BX284668.5	GL	STD	0.05355	0.07717	0.79529	0.09045	0.144
ENST00000671472	BX284668.5	RF	STD	0.01638	0.27732	0.82136	0.02294	0.03932
ENST00000654227	BX284668.5	STD	VL	-0.03706	0.12469	0.8418	0.14547	0.10841
ENST00000666544	BX284668.5	STD	STM	-0.05763	0.06551	0.84255	0.26632	0.20868
ENST00000660464	BX284668.5	GR	RF	-0.05534	0.31221	0.84362	0.2204	0.16506
ENST00000654227	BX284668.5	GR	RF	-0.06335	0.31641	0.84467	0.21235	0.149
ENST00000457075	BX284668.5	RF	STM	0.02339	0.30629	0.84696	0.14488	0.16826
ENST00000422124	BX284668.5	GR	VM	-0.051	0.23391	0.85487	0.12065	0.06965
ENST00000660464	BX284668.5	RF	STM	0.04352	0.37845	0.88222	0.16506	0.20858
ENST00000671472	BX284668.5	GR	VL	-0.01026	0.31874	0.88691	0.03755	0.02729
ENST00000416869	BX284668.5	GR	VM	0.02527	0.31286	0.89233	0.1062	0.13147
ENST00000660464	BX284668.5	GL	VL	0.10092	0.05732	0.89343	0.0829	0.18382
ENST00000666544	BX284668.5	GL	RF	-0.07291	0.20513	0.90077	0.36235	0.28944
ENST00000422124	BX284668.5	GL	RF	0.05761	0.20903	0.90207	0.09045	0.14806
ENST00000457075	BX284668.5	STM	VM	-0.0162	0.38881	0.90266	0.16826	0.15206
ENST00000671472	BX284668.5	RF	STM	0.0018	0.44747	0.91058	0.02294	0.02474
ENST00000660464	BX284668.5	GL	VM	0.04575	0.04792	0.91398	0.0829	0.12865
ENST00000416869	BX284668.5	STD	VM	0.04447	0.23956	0.91743	0.087	0.13147
ENST00000416869	BX284668.5	GR	VL	-0.04296	0.43097	0.92602	0.1062	0.06324
ENST00000654227	BX284668.5	RF	STM	0.04832	0.50213	0.92769	0.149	0.19732
ENST00000666544	BX284668.5	RF	STD	-0.02312	0.55693	0.93015	0.28944	0.26632
ENST00000422124	BX284668.5	RF	STM	-0.04096	0.51628	0.9311	0.14806	0.10711
ENST00000654227	BX284668.5	GR	STD	-0.06688	0.12633	0.93161	0.21235	0.14547
ENST00000416869	BX284668.5	STM	VL	-0.02224	0.5118	0.9354	0.08547	0.06324
ENST00000671472	BX284668.5	STD	VL	-0.01202	0.30642	0.93795	0.03932	0.02729
ENST00000654227	BX284668.5	GL	GR	0.0504	0.36525	0.9381	0.16195	0.21235
ENST00000654227	BX284668.5	STD	STM	0.05184	0.17803	0.94205	0.14547	0.19732
ENST00000660464	BX284668.5	STD	VM	-0.04877	0.34752	0.94611	0.17742	0.12865
ENST00000654227	BX284668.5	STD	VM	0.02523	0.35042	0.94715	0.14547	0.17071
ENST00000416869	BX284668.5	STM	VM	0.046	0.54977	0.94765	0.08547	0.13147
ENST00000422124	BX284668.5	GR	RF	0.02741	0.60636	0.94766	0.12065	0.14806
ENST00000671472	BX284668.5	STD	VM	-0.0159	0.35341	0.94777	0.03932	0.02341
ENST00000671472	BX284668.5	GR	VM	-0.01414	0.51242	0.94907	0.03755	0.02341
ENST00000654227	BX284668.5	GR	VM	-0.04164	0.52301	0.95071	0.21235	0.17071
ENST00000422124	BX284668.5	GL	STM	0.01666	0.34051	0.95079	0.09045	0.10711
ENST00000666544	BX284668.5	STD	VM	0.05757	0.36576	0.95091	0.26632	0.32388
ENST00000457075	BX284668.5	GR	VL	0.01489	0.57218	0.95467	0.1317	0.14659
ENST00000671472	BX284668.5	STM	VL	0.00256	0.5995	0.95715	0.02474	0.02729
ENST00000457075	BX284668.5	RF	STD	-0.00435	0.7044	0.96061	0.14488	0.14053
ENST00000654227	BX284668.5	GL	RF	-0.01295	0.40411	0.96203	0.16195	0.149
ENST00000654227	BX284668.5	GL	STD	-0.01648	0.40579	0.96226	0.16195	0.14547
ENST00000416869	BX284668.5	STD	VL	-0.02376	0.43819	0.96327	0.087	0.06324
ENST00000422124	BX284668.5	GL	GR	0.0302	0.49825	0.96356	0.09045	0.12065
ENST00000671472	BX284668.5	STM	VM	-0.00133	0.63207	0.9648	0.02474	0.02341
ENST00000671472	BX284668.5	GL	RF	-0.01116	0.43421	0.97022	0.0341	0.02294
ENST00000660464	BX284668.5	STM	VL	-0.02476	0.69415	0.97293	0.20858	0.18382
ENST00000654227	BX284668.5	STM	VM	-0.02661	0.70753	0.97427	0.19732	0.17071
ENST00000422124	BX284668.5	STD	VL	-0.01159	0.5291	0.97635	0.144	0.13241
ENST00000660464	BX284668.5	RF	STD	0.01236	0.80123	0.97871	0.16506	0.17742
ENST00000422124	BX284668.5	STM	VL	0.02531	0.77544	0.98292	0.10711	0.13241
ENST00000422124	BX284668.5	STD	STM	-0.03689	0.31542	0.98573	0.144	0.10711
ENST00000660464	BX284668.5	STD	VL	0.0064	0.66641	0.98614	0.17742	0.18382
ENST00000457075	BX284668.5	GR	VM	0.02036	0.78642	0.98688	0.1317	0.15206
ENST00000660464	BX284668.5	GR	VL	-0.03658	0.80198	0.98688	0.2204	0.18382
ENST00000671472	BX284668.5	GL	GR	0.00345	0.68336	0.98703	0.0341	0.03755
ENST00000457075	BX284668.5	GL	GR	-0.04525	0.69174	0.98751	0.17695	0.1317
ENST00000416869	BX284668.5	GL	GR	0.0149	0.69356	0.98772	0.0913	0.1062
ENST00000671472	BX284668.5	STD	STM	-0.01458	0.35874	0.98855	0.03932	0.02474
ENST00000416869	BX284668.5	GL	STM	-0.00583	0.62151	0.98868	0.0913	0.08547
ENST00000671472	BX284668.5	GL	STD	0.00522	0.57178	0.9889	0.0341	0.03932
ENST00000457075	BX284668.5	STD	VM	0.01153	0.65361	0.99052	0.14053	0.15206
ENST00000416869	BX284668.5	RF	STM	0.00485	0.83203	0.99067	0.08063	0.08547
ENST00000654227	BX284668.5	RF	STD	-0.00353	0.88467	0.99073	0.149	0.14547
ENST00000654227	BX284668.5	GL	VL	-0.05354	0.14163	0.99111	0.16195	0.10841
ENST00000422124	BX284668.5	GR	VL	0.01176	0.85448	0.99158	0.12065	0.13241
ENST00000457075	BX284668.5	GL	STM	-0.00869	0.69632	0.99327	0.17695	0.16826
ENST00000422124	BX284668.5	RF	STD	-0.00406	0.89645	0.99333	0.14806	0.144
ENST00000416869	BX284668.5	GL	RF	-0.01068	0.72914	0.99416	0.0913	0.08063
ENST00000416869	BX284668.5	GR	RF	-0.02558	0.91856	0.99475	0.1062	0.08063
ENST00000457075	BX284668.5	STM	VL	-0.02167	0.85875	0.99589	0.16826	0.14659
ENST00000457075	BX284668.5	STD	VL	0.00606	0.89601	0.99811	0.14053	0.14659
ENST00000654227	BX284668.5	GL	STM	0.03537	0.80997	0.99831	0.16195	0.19732
ENST00000457075	BX284668.5	GL	RF	-0.03207	0.9273	1	0.17695	0.14488
ENST00000416869	BX284668.5	GL	STD	-0.0043	0.87914	1	0.0913	0.087
ENST00000457075	BX284668.5	GL	STD	-0.03642	0.78154	1	0.17695	0.14053
ENST00000671472	BX284668.5	GL	STM	-0.00936	0.96316	1	0.0341	0.02474
ENST00000671472	BX284668.5	GL	VL	-0.00681	0.55817	1	0.0341	0.02729
ENST00000422124	BX284668.5	GL	VL	0.04196	0.78164	1	0.09045	0.13241
ENST00000666544	BX284668.5	GL	VL	-0.024	0.98113	1	0.36235	0.33835
ENST00000416869	BX284668.5	GL	VL	-0.02806	0.54984	1	0.0913	0.06324
ENST00000457075	BX284668.5	GL	VL	-0.03036	0.82548	1	0.17695	0.14659
ENST00000654227	BX284668.5	GL	VM	0.00876	0.57562	1	0.16195	0.17071
ENST00000671472	BX284668.5	GL	VM	-0.01069	0.73281	1	0.0341	0.02341
ENST00000422124	BX284668.5	GL	VM	-0.0208	0.79732	1	0.09045	0.06965
ENST00000666544	BX284668.5	GL	VM	-0.03847	0.14694	1	0.36235	0.32388
ENST00000416869	BX284668.5	GL	VM	0.04017	0.21121	1	0.0913	0.13147
ENST00000457075	BX284668.5	GL	VM	-0.02489	0.65176	1	0.17695	0.15206
ENST00000457075	BX284668.5	GR	RF	0.01317	0.99369	1	0.1317	0.14488
ENST00000671472	BX284668.5	GR	STD	0.00177	0.84339	1	0.03755	0.03932
ENST00000422124	BX284668.5	GR	STD	0.02335	0.50074	1	0.12065	0.144
ENST00000660464	BX284668.5	GR	STD	-0.04298	0.50222	1	0.2204	0.17742
ENST00000416869	BX284668.5	GR	STD	-0.0192	0.86788	1	0.1062	0.087
ENST00000457075	BX284668.5	GR	STD	0.00883	0.54746	1	0.1317	0.14053
ENST00000654227	BX284668.5	GR	STM	-0.01503	0.86117	1	0.21235	0.19732
ENST00000671472	BX284668.5	GR	STM	-0.01281	0.61541	1	0.03755	0.02474
ENST00000422124	BX284668.5	GR	STM	-0.01354	0.84525	1	0.12065	0.10711
ENST00000660464	BX284668.5	GR	STM	-0.01182	0.85875	1	0.2204	0.20858
ENST00000666544	BX284668.5	GR	STM	0.03753	0.47683	1	0.17115	0.20868
ENST00000416869	BX284668.5	GR	STM	-0.02073	0.65541	1	0.1062	0.08547
ENST00000457075	BX284668.5	GR	STM	0.03656	0.36086	1	0.1317	0.16826
ENST00000416869	BX284668.5	RF	STD	0.00638	0.94467	1	0.08063	0.087
ENST00000654227	BX284668.5	RF	VL	-0.04059	0.28765	1	0.149	0.10841
ENST00000671472	BX284668.5	RF	VL	0.00436	0.56803	1	0.02294	0.02729
ENST00000422124	BX284668.5	RF	VL	-0.01565	0.4248	1	0.14806	0.13241
ENST00000660464	BX284668.5	RF	VL	0.01876	0.45531	1	0.16506	0.18382
ENST00000666544	BX284668.5	RF	VL	0.04892	0.42895	1	0.28944	0.33835
ENST00000416869	BX284668.5	RF	VL	-0.01739	0.80404	1	0.08063	0.06324
ENST00000457075	BX284668.5	RF	VL	0.00171	0.9677	1	0.14488	0.14659
ENST00000654227	BX284668.5	RF	VM	0.02171	0.33461	1	0.149	0.17071
ENST00000671472	BX284668.5	RF	VM	0.00047	0.63444	1	0.02294	0.02341
ENST00000422124	BX284668.5	RF	VM	-0.07842	0.08792	1	0.14806	0.06965
ENST00000660464	BX284668.5	RF	VM	-0.03642	0.53186	1	0.16506	0.12865
ENST00000666544	BX284668.5	RF	VM	0.03444	0.697	1	0.28944	0.32388
ENST00000416869	BX284668.5	RF	VM	0.05085	0.27363	1	0.08063	0.13147
ENST00000457075	BX284668.5	RF	VM	0.00718	0.87606	1	0.14488	0.15206
ENST00000660464	BX284668.5	STD	STM	0.03116	0.57967	1	0.17742	0.20858
ENST00000416869	BX284668.5	STD	STM	-0.00153	0.72712	1	0.087	0.08547
ENST00000457075	BX284668.5	STD	STM	0.02774	0.56668	1	0.14053	0.16826
ENST00000654227	BX284668.5	VL	VM	0.06229	0.14802	1	0.10841	0.17071
ENST00000671472	BX284668.5	VL	VM	-0.00388	0.963	1	0.02729	0.02341
ENST00000422124	BX284668.5	VL	VM	-0.06276	0.57893	1	0.13241	0.06965
ENST00000660464	BX284668.5	VL	VM	-0.05518	0.48925	1	0.18382	0.12865
ENST00000666544	BX284668.5	VL	VM	-0.01447	0.25687	1	0.33835	0.32388
ENST00000416869	BX284668.5	VL	VM	0.06824	0.02714	1	0.06324	0.13147
ENST00000457075	BX284668.5	VL	VM	0.00547	0.51435	1	0.14659	0.15206
ENST00000376300	CCDC93	RF	STD	0.46702	1e-05	0.01009	0.29719	0.76421
ENST00000319432	CCDC93	RF	STD	-0.44901	6e-05	0.02907	0.62275	0.17374
ENST00000376300	CCDC93	GL	STD	0.37311	0.00045	0.14735	0.3911	0.76421
ENST00000319432	CCDC93	STD	VL	0.2975	0.00064	0.15594	0.17374	0.47124
ENST00000319432	CCDC93	GL	STD	-0.35381	0.00192	0.26682	0.52755	0.17374
ENST00000376300	CCDC93	GR	RF	-0.29646	0.01738	0.35981	0.59365	0.29719
ENST00000376300	CCDC93	STD	VL	-0.30968	0.00779	0.43245	0.76421	0.45453
ENST00000474546	CCDC93	GR	VM	-0.01859	0.06314	0.63813	0.04235	0.02376
ENST00000319432	CCDC93	RF	STM	-0.16901	0.10874	0.65982	0.62275	0.45374
ENST00000474546	CCDC93	RF	STD	-0.02411	0.15643	0.71858	0.049	0.02489
ENST00000376300	CCDC93	RF	STM	0.18134	0.1503	0.72309	0.29719	0.47853
ENST00000319432	CCDC93	GR	RF	0.3065	0.16765	0.72505	0.31625	0.62275
ENST00000474546	CCDC93	STM	VL	0.02675	0.14621	0.73625	0.02237	0.04912
ENST00000470650	CCDC93	GL	VL	-0.01527	0.01845	0.74718	0.0198	0.00453
ENST00000474546	CCDC93	RF	STM	-0.02663	0.17348	0.75049	0.049	0.02237
ENST00000319432	CCDC93	GR	STD	-0.14251	0.03308	0.7818	0.31625	0.17374
ENST00000474546	CCDC93	STD	VL	0.02422	0.09227	0.80134	0.02489	0.04912
ENST00000466171	CCDC93	STM	VL	-0.00642	0.25554	0.83289	0.01442	0.008
ENST00000466171	CCDC93	STD	VL	-0.00516	0.13109	0.84995	0.01316	0.008
ENST00000470650	CCDC93	GL	RF	-0.01099	0.13539	0.8544	0.0198	0.00881
ENST00000376300	CCDC93	STD	STM	-0.28568	0.08448	0.86327	0.76421	0.47853
ENST00000319432	CCDC93	STD	STM	0.28	0.09756	0.88166	0.17374	0.45374
ENST00000470650	CCDC93	GR	VL	-0.01102	0.29899	0.88198	0.01555	0.00453
ENST00000474546	CCDC93	GL	STM	-0.01693	0.17013	0.89138	0.0393	0.02237
ENST00000376300	CCDC93	GR	STD	0.17056	0.087	0.89281	0.59365	0.76421
ENST00000376300	CCDC93	STM	VM	0.1333	0.37718	0.89901	0.47853	0.61182
ENST00000474546	CCDC93	GL	STD	-0.01441	0.21521	0.90502	0.0393	0.02489
ENST00000319432	CCDC93	GR	VM	-0.0056	0.3579	0.90965	0.31625	0.31065
ENST00000376300	CCDC93	GL	GR	0.20255	0.29592	0.91184	0.3911	0.59365
ENST00000466171	CCDC93	RF	STD	0.00041	0.49187	0.91219	0.01275	0.01316
ENST00000376300	CCDC93	STM	VL	-0.024	0.44224	0.91428	0.47853	0.45453
ENST00000319432	CCDC93	STM	VM	-0.14309	0.44467	0.91816	0.45374	0.31065
ENST00000470650	CCDC93	STD	VL	-0.01237	0.25968	0.92358	0.01689	0.00453
ENST00000470650	CCDC93	STM	VM	0.00792	0.47661	0.92622	0.01132	0.01924
ENST00000470650	CCDC93	RF	STD	0.00808	0.54899	0.92804	0.00881	0.01689
ENST00000376300	CCDC93	RF	VM	0.31464	0.01512	0.92911	0.29719	0.61182
ENST00000466171	CCDC93	GR	VL	-0.00895	0.45698	0.93157	0.01695	0.008
ENST00000470650	CCDC93	GL	STM	-0.00848	0.27342	0.93382	0.0198	0.01132
ENST00000470650	CCDC93	GR	RF	-0.00674	0.55225	0.93415	0.01555	0.00881
ENST00000319432	CCDC93	GL	VM	-0.2169	0.06685	0.93768	0.52755	0.31065
ENST00000376300	CCDC93	STD	VM	-0.15239	0.31156	0.93808	0.76421	0.61182
ENST00000466171	CCDC93	RF	STM	0.00167	0.55828	0.94105	0.01275	0.01442
ENST00000376300	CCDC93	GR	VM	0.01817	0.48741	0.94339	0.59365	0.61182
ENST00000474546	CCDC93	GR	STD	-0.01746	0.1581	0.94616	0.04235	0.02489
ENST00000319432	CCDC93	STM	VL	0.0175	0.55171	0.94708	0.45374	0.47124
ENST00000466171	CCDC93	GR	RF	-0.0042	0.7048	0.96343	0.01695	0.01275
ENST00000376300	CCDC93	GL	RF	-0.09391	0.4244	0.96716	0.3911	0.29719
ENST00000466171	CCDC93	GL	GR	0.00345	0.53664	0.96884	0.0135	0.01695
ENST00000376300	CCDC93	GR	VL	-0.13912	0.65416	0.96896	0.59365	0.45453
ENST00000466171	CCDC93	GL	STM	0.00092	0.4292	0.97	0.0135	0.01442
ENST00000319432	CCDC93	GL	STM	-0.07381	0.4448	0.97084	0.52755	0.45374
ENST00000319432	CCDC93	GL	RF	0.0952	0.44788	0.97247	0.52755	0.62275
ENST00000470650	CCDC93	GL	STD	-0.00291	0.45935	0.97264	0.0198	0.01689
ENST00000470650	CCDC93	GL	GR	-0.00425	0.60003	0.97884	0.0198	0.01555
ENST00000474546	CCDC93	GR	RF	0.00665	0.81026	0.97906	0.04235	0.049
ENST00000474546	CCDC93	GL	GR	0.00305	0.63994	0.98268	0.0393	0.04235
ENST00000474546	CCDC93	GR	VL	0.00677	0.79134	0.98547	0.04235	0.04912
ENST00000376300	CCDC93	GL	STM	0.08743	0.58821	0.9867	0.3911	0.47853
ENST00000319432	CCDC93	GR	VL	0.15499	0.81997	0.98794	0.31625	0.47124
ENST00000470650	CCDC93	GR	VM	0.00369	0.79871	0.98821	0.01555	0.01924
ENST00000319432	CCDC93	GL	GR	-0.2113	0.74309	0.98935	0.52755	0.31625
ENST00000470650	CCDC93	STD	VM	0.00234	0.65482	0.99054	0.01689	0.01924
ENST00000466171	CCDC93	GL	STD	-0.00034	0.64578	0.99601	0.0135	0.01316
ENST00000466171	CCDC93	GL	RF	-0.00075	0.883	0.99763	0.0135	0.01275
ENST00000470650	CCDC93	STM	VL	-0.00679	0.88375	0.99763	0.01132	0.00453
ENST00000474546	CCDC93	GL	RF	0.0097	0.93294	1	0.0393	0.049
ENST00000319432	CCDC93	GL	VL	-0.05631	0.75202	1	0.52755	0.47124
ENST00000376300	CCDC93	GL	VL	0.06343	0.90691	1	0.3911	0.45453
ENST00000474546	CCDC93	GL	VL	0.00982	0.95409	1	0.0393	0.04912
ENST00000466171	CCDC93	GL	VL	-0.0055	0.46176	1	0.0135	0.008
ENST00000376300	CCDC93	GL	VM	0.22072	0.12868	1	0.3911	0.61182
ENST00000474546	CCDC93	GL	VM	-0.01554	0.25209	1	0.0393	0.02376
ENST00000470650	CCDC93	GL	VM	-0.00056	0.7761	1	0.0198	0.01924
ENST00000466171	CCDC93	GL	VM	-0.00168	0.39898	1	0.0135	0.01182
ENST00000470650	CCDC93	GR	STD	0.00134	0.94797	1	0.01555	0.01689
ENST00000466171	CCDC93	GR	STD	-0.00379	1	1	0.01695	0.01316
ENST00000319432	CCDC93	GR	STM	0.13749	0.61165	1	0.31625	0.45374
ENST00000376300	CCDC93	GR	STM	-0.11512	0.62213	1	0.59365	0.47853
ENST00000474546	CCDC93	GR	STM	-0.01998	0.09267	1	0.04235	0.02237
ENST00000470650	CCDC93	GR	STM	-0.00423	0.60828	1	0.01555	0.01132
ENST00000466171	CCDC93	GR	STM	-0.00253	0.9069	1	0.01695	0.01442
ENST00000466171	CCDC93	GR	VM	-0.00513	0.9164	1	0.01695	0.01182
ENST00000470650	CCDC93	RF	STM	0.0025	0.96702	1	0.00881	0.01132
ENST00000319432	CCDC93	RF	VL	-0.15151	0.42558	1	0.62275	0.47124
ENST00000376300	CCDC93	RF	VL	0.15734	0.25271	1	0.29719	0.45453
ENST00000474546	CCDC93	RF	VL	0.00012	0.83349	1	0.049	0.04912
ENST00000470650	CCDC93	RF	VL	-0.00428	0.61872	1	0.00881	0.00453
ENST00000466171	CCDC93	RF	VL	-0.00475	0.62879	1	0.01275	0.008
ENST00000319432	CCDC93	RF	VM	-0.3121	0.0382	1	0.62275	0.31065
ENST00000474546	CCDC93	RF	VM	-0.02524	0.10235	1	0.049	0.02376
ENST00000470650	CCDC93	RF	VM	0.01042	0.25617	1	0.00881	0.01924
ENST00000466171	CCDC93	RF	VM	-0.00093	0.60639	1	0.01275	0.01182
ENST00000474546	CCDC93	STD	STM	-0.00253	0.76744	1	0.02489	0.02237
ENST00000470650	CCDC93	STD	STM	-0.00558	0.66625	1	0.01689	0.01132
ENST00000466171	CCDC93	STD	STM	0.00126	1	1	0.01316	0.01442
ENST00000319432	CCDC93	STD	VM	0.13691	1	1	0.17374	0.31065
ENST00000474546	CCDC93	STD	VM	-0.00113	0.8876	1	0.02489	0.02376
ENST00000466171	CCDC93	STD	VM	-0.00133	0.9881	1	0.01316	0.01182
ENST00000474546	CCDC93	STM	VM	0.0014	1	1	0.02237	0.02376
ENST00000466171	CCDC93	STM	VM	-0.0026	0.97567	1	0.01442	0.01182
ENST00000319432	CCDC93	VL	VM	-0.16059	0.30927	1	0.47124	0.31065
ENST00000376300	CCDC93	VL	VM	0.15729	0.30432	1	0.45453	0.61182
ENST00000474546	CCDC93	VL	VM	-0.02535	0.20021	1	0.04912	0.02376
ENST00000470650	CCDC93	VL	VM	0.01471	0.08649	1	0.00453	0.01924
ENST00000466171	CCDC93	VL	VM	0.00382	0.30488	1	0.008	0.01182
ENST00000358777	CEACAM19	GR	RF	-0.13188	0.00012	0.03706	0.3745	0.24262
ENST00000480278	CEACAM19	GR	RF	0.11925	0.00119	0.11254	0.34525	0.4645
ENST00000358777	CEACAM19	RF	STD	0.09069	0.00108	0.13984	0.24262	0.33332
ENST00000480278	CEACAM19	RF	STD	-0.09034	0.00481	0.24413	0.4645	0.37416
ENST00000480278	CEACAM19	GL	RF	0.1051	0.00034	0.27981	0.3594	0.4645
ENST00000358777	CEACAM19	GL	RF	-0.08242	0.0043	0.44392	0.32505	0.24262
ENST00000459648	CEACAM19	STD	VM	0.00389	0.02317	0.61432	0.01711	0.021
ENST00000403660	CEACAM19	GL	GR	-0.04475	0.03592	0.63794	0.1865	0.14175
ENST00000622237	CEACAM19	GR	VL	-0.01686	0.07183	0.65028	0.0301	0.01324
ENST00000618372	CEACAM19	STM	VM	-0.01686	0.07748	0.65443	0.09216	0.07529
ENST00000480278	CEACAM19	RF	VM	-0.12938	0.00064	0.67986	0.4645	0.33512
ENST00000403660	CEACAM19	GL	VL	-0.06091	0.01093	0.68156	0.1865	0.12559
ENST00000358777	CEACAM19	RF	VM	0.13202	0.00232	0.68951	0.24262	0.37465
ENST00000480278	CEACAM19	RF	STM	-0.0615	0.1278	0.69233	0.4645	0.403
ENST00000358777	CEACAM19	RF	VL	0.1259	0.00462	0.69371	0.24262	0.36853
ENST00000459648	CEACAM19	GR	VM	0.00535	0.08723	0.70286	0.01565	0.021
ENST00000459648	CEACAM19	STM	VL	-0.00748	0.11964	0.7041	0.02042	0.01294
ENST00000403660	CEACAM19	STM	VL	-0.03141	0.13437	0.72021	0.157	0.12559
ENST00000358777	CEACAM19	RF	STM	0.05848	0.16043	0.73712	0.24262	0.30111
ENST00000618372	CEACAM19	STM	VL	-0.01892	0.16281	0.75712	0.09216	0.07324
ENST00000403660	CEACAM19	GL	STD	-0.03408	0.06831	0.77601	0.1865	0.15242
ENST00000480278	CEACAM19	GR	VL	0.0574	0.14792	0.77676	0.34525	0.40265
ENST00000358777	CEACAM19	STM	VM	0.07354	0.16706	0.77802	0.30111	0.37465
ENST00000622237	CEACAM19	GL	STM	-0.00835	0.06328	0.77841	0.0274	0.01905
ENST00000622237	CEACAM19	RF	STM	-0.01263	0.20897	0.78067	0.03169	0.01905
ENST00000480278	CEACAM19	STM	VM	-0.06788	0.19257	0.80079	0.403	0.33512
ENST00000480278	CEACAM19	STM	VL	-0.00035	0.22345	0.81177	0.403	0.40265
ENST00000459648	CEACAM19	GL	VM	0.0057	0.02052	0.81292	0.0153	0.021
ENST00000403660	CEACAM19	GL	RF	-0.03662	0.10506	0.82439	0.1865	0.14988
ENST00000358777	CEACAM19	GL	GR	0.04945	0.16481	0.8402	0.32505	0.3745
ENST00000618372	CEACAM19	RF	STM	0.00847	0.306	0.84693	0.08369	0.09216
ENST00000403660	CEACAM19	STD	VL	-0.02683	0.15093	0.87093	0.15242	0.12559
ENST00000403660	CEACAM19	GR	VM	0.03278	0.28805	0.8829	0.14175	0.17453
ENST00000459648	CEACAM19	RF	STD	-0.00158	0.41938	0.88723	0.01869	0.01711
ENST00000618372	CEACAM19	STD	STM	0.01963	0.10805	0.89074	0.07253	0.09216
ENST00000358777	CEACAM19	STM	VL	0.06742	0.39554	0.8951	0.30111	0.36853
ENST00000459648	CEACAM19	VL	VM	0.00806	0.00654	0.90054	0.01294	0.021
ENST00000459648	CEACAM19	GR	RF	0.00304	0.44229	0.90274	0.01565	0.01869
ENST00000480278	CEACAM19	STD	VM	-0.03904	0.22963	0.91392	0.37416	0.33512
ENST00000358777	CEACAM19	GR	STD	-0.04118	0.11334	0.91612	0.3745	0.33332
ENST00000459648	CEACAM19	STD	STM	0.00332	0.15876	0.92612	0.01711	0.02042
ENST00000358777	CEACAM19	STD	VM	0.04133	0.2641	0.9263	0.33332	0.37465
ENST00000459648	CEACAM19	STM	VM	0.00058	0.48105	0.92744	0.02042	0.021
ENST00000403660	CEACAM19	RF	STD	0.00255	0.54788	0.92775	0.14988	0.15242
ENST00000618372	CEACAM19	GL	STM	0.01026	0.24608	0.92859	0.0819	0.09216
ENST00000403660	CEACAM19	GR	VL	-0.01616	0.4734	0.93579	0.14175	0.12559
ENST00000459648	CEACAM19	GR	VL	-0.00271	0.49958	0.93968	0.01565	0.01294
ENST00000622237	CEACAM19	RF	STD	0.00852	0.59464	0.93994	0.03169	0.04021
ENST00000459648	CEACAM19	STD	VL	-0.00416	0.31614	0.94071	0.01711	0.01294
ENST00000459648	CEACAM19	GL	STM	0.00512	0.31066	0.94528	0.0153	0.02042
ENST00000403660	CEACAM19	STM	VM	0.01753	0.55909	0.94873	0.157	0.17453
ENST00000622237	CEACAM19	GR	VM	-0.01175	0.5204	0.95071	0.0301	0.01835
ENST00000618372	CEACAM19	RF	STD	-0.01116	0.65204	0.9517	0.08369	0.07253
ENST00000459648	CEACAM19	GL	RF	0.00339	0.38675	0.95861	0.0153	0.01869
ENST00000403660	CEACAM19	GL	STM	-0.0295	0.36848	0.95945	0.1865	0.157
ENST00000622237	CEACAM19	GR	RF	0.00159	0.68457	0.96089	0.0301	0.03169
ENST00000480278	CEACAM19	STD	VL	0.02849	0.43482	0.96272	0.37416	0.40265
ENST00000622237	CEACAM19	GL	STD	0.01281	0.43233	0.96684	0.0274	0.04021
ENST00000480278	CEACAM19	GL	STD	0.01476	0.43641	0.96789	0.3594	0.37416
ENST00000480278	CEACAM19	GL	STM	0.0436	0.42255	0.96928	0.3594	0.403
ENST00000618372	CEACAM19	GR	RF	-0.00121	0.75529	0.97076	0.0849	0.08369
ENST00000480278	CEACAM19	GR	VM	-0.01013	0.69328	0.97729	0.34525	0.33512
ENST00000358777	CEACAM19	GR	VL	-0.00597	0.72944	0.97824	0.3745	0.36853
ENST00000358777	CEACAM19	STD	STM	-0.03221	0.29599	0.98252	0.33332	0.30111
ENST00000622237	CEACAM19	STD	VL	-0.02698	0.61683	0.98294	0.04021	0.01324
ENST00000358777	CEACAM19	STD	VL	0.03521	0.6389	0.98304	0.33332	0.36853
ENST00000403660	CEACAM19	STD	VM	0.02211	0.59885	0.98398	0.15242	0.17453
ENST00000358777	CEACAM19	GL	STM	-0.02394	0.54866	0.98467	0.32505	0.30111
ENST00000622237	CEACAM19	STM	VL	-0.00582	0.78606	0.98468	0.01905	0.01324
ENST00000618372	CEACAM19	GL	GR	0.003	0.66844	0.98628	0.0819	0.0849
ENST00000622237	CEACAM19	STM	VM	-0.0007	0.82821	0.98811	0.01905	0.01835
ENST00000459648	CEACAM19	GL	GR	0.00035	0.73722	0.98935	0.0153	0.01565
ENST00000618372	CEACAM19	GR	VM	-0.00961	0.81455	0.99093	0.0849	0.07529
ENST00000618372	CEACAM19	STD	VL	0.00071	0.73083	0.99097	0.07253	0.07324
ENST00000618372	CEACAM19	GR	VL	-0.01166	0.85461	0.99161	0.0849	0.07324
ENST00000622237	CEACAM19	STD	STM	-0.02116	0.40781	0.99167	0.04021	0.01905
ENST00000403660	CEACAM19	GR	RF	0.00813	0.91319	0.99402	0.14175	0.14988
ENST00000618372	CEACAM19	GL	STD	-0.00937	0.6145	0.99412	0.0819	0.07253
ENST00000618372	CEACAM19	GL	RF	0.00179	0.73922	0.99416	0.0819	0.08369
ENST00000622237	CEACAM19	STD	VM	-0.02186	0.75379	0.99416	0.04021	0.01835
ENST00000480278	CEACAM19	GR	STD	0.02891	0.31853	0.99423	0.34525	0.37416
ENST00000403660	CEACAM19	RF	STM	0.00712	0.86148	0.99431	0.14988	0.157
ENST00000622237	CEACAM19	GL	GR	0.0027	0.86404	0.9969	0.0274	0.0301
ENST00000618372	CEACAM19	STD	VM	0.00277	0.82201	0.99724	0.07253	0.07529
ENST00000358777	CEACAM19	GR	VM	0.00015	0.8989	0.99881	0.3745	0.37465
ENST00000480278	CEACAM19	GL	GR	-0.01415	0.8972	1	0.3594	0.34525
ENST00000622237	CEACAM19	GL	RF	0.00429	0.95306	1	0.0274	0.03169
ENST00000358777	CEACAM19	GL	STD	0.00827	0.71616	1	0.32505	0.33332
ENST00000459648	CEACAM19	GL	STD	0.00181	0.92792	1	0.0153	0.01711
ENST00000622237	CEACAM19	GL	VL	-0.01416	0.17097	1	0.0274	0.01324
ENST00000618372	CEACAM19	GL	VL	-0.00866	0.54093	1	0.0819	0.07324
ENST00000358777	CEACAM19	GL	VL	0.04348	0.31552	1	0.32505	0.36853
ENST00000480278	CEACAM19	GL	VL	0.04325	0.19472	1	0.3594	0.40265
ENST00000459648	CEACAM19	GL	VL	-0.00236	0.23305	1	0.0153	0.01294
ENST00000622237	CEACAM19	GL	VM	-0.00905	0.28488	1	0.0274	0.01835
ENST00000618372	CEACAM19	GL	VM	-0.00661	0.62578	1	0.0819	0.07529
ENST00000358777	CEACAM19	GL	VM	0.0496	0.19887	1	0.32505	0.37465
ENST00000403660	CEACAM19	GL	VM	-0.01197	0.32163	1	0.1865	0.17453
ENST00000480278	CEACAM19	GL	VM	-0.02428	0.59807	1	0.3594	0.33512
ENST00000622237	CEACAM19	GR	STD	0.01011	0.72418	1	0.0301	0.04021
ENST00000618372	CEACAM19	GR	STD	-0.01237	0.6723	1	0.0849	0.07253
ENST00000403660	CEACAM19	GR	STD	0.01067	0.54475	1	0.14175	0.15242
ENST00000459648	CEACAM19	GR	STD	0.00146	0.82791	1	0.01565	0.01711
ENST00000622237	CEACAM19	GR	STM	-0.01105	0.43936	1	0.0301	0.01905
ENST00000618372	CEACAM19	GR	STM	0.00726	0.55059	1	0.0849	0.09216
ENST00000358777	CEACAM19	GR	STM	-0.07339	0.07405	1	0.3745	0.30111
ENST00000403660	CEACAM19	GR	STM	0.01525	0.74637	1	0.14175	0.157
ENST00000480278	CEACAM19	GR	STM	0.05775	0.23193	1	0.34525	0.403
ENST00000459648	CEACAM19	GR	STM	0.00477	0.51695	1	0.01565	0.02042
ENST00000459648	CEACAM19	RF	STM	0.00173	0.98924	1	0.01869	0.02042
ENST00000622237	CEACAM19	RF	VL	-0.01845	0.13322	1	0.03169	0.01324
ENST00000618372	CEACAM19	RF	VL	-0.01045	0.68321	1	0.08369	0.07324
ENST00000403660	CEACAM19	RF	VL	-0.02429	0.46683	1	0.14988	0.12559
ENST00000480278	CEACAM19	RF	VL	-0.06185	0.10322	1	0.4645	0.40265
ENST00000459648	CEACAM19	RF	VL	-0.00575	0.24248	1	0.01869	0.01294
ENST00000622237	CEACAM19	RF	VM	-0.01333	0.30272	1	0.03169	0.01835
ENST00000618372	CEACAM19	RF	VM	-0.00839	0.96126	1	0.08369	0.07529
ENST00000403660	CEACAM19	RF	VM	0.02465	0.46268	1	0.14988	0.17453
ENST00000459648	CEACAM19	RF	VM	0.00231	0.55818	1	0.01869	0.021
ENST00000403660	CEACAM19	STD	STM	0.00458	0.97546	1	0.15242	0.157
ENST00000480278	CEACAM19	STD	STM	0.02884	0.69268	1	0.37416	0.403
ENST00000622237	CEACAM19	VL	VM	0.00512	0.4369	1	0.01324	0.01835
ENST00000618372	CEACAM19	VL	VM	0.00206	0.81743	1	0.07324	0.07529
ENST00000358777	CEACAM19	VL	VM	0.00612	0.69205	1	0.36853	0.37465
ENST00000403660	CEACAM19	VL	VM	0.04894	0.17554	1	0.12559	0.17453
ENST00000480278	CEACAM19	VL	VM	-0.06753	0.07321	1	0.40265	0.33512
ENST00000416322	CLDN12	STM	VM	-0.13559	0	0.00123	0.162	0.02641
ENST00000495768	CLDN12	GR	RF	-0.01724	1e-05	0.00654	0.02305	0.00581
ENST00000416322	CLDN12	GL	STM	0.12375	1e-05	0.03816	0.03825	0.162
ENST00000416322	CLDN12	RF	STM	0.10606	0.00042	0.08324	0.05594	0.162
ENST00000495768	CLDN12	RF	STM	0.01277	0.00054	0.09379	0.00581	0.01858
ENST00000416322	CLDN12	STD	STM	0.11842	0.00015	0.15076	0.04358	0.162
ENST00000416322	CLDN12	STM	VL	-0.10388	0.00257	0.19017	0.162	0.05812
ENST00000462636	CLDN12	RF	STD	0.03764	0.00815	0.30182	0.08625	0.12389
ENST00000462636	CLDN12	STD	VL	-0.04272	0.00432	0.3567	0.12389	0.08118
ENST00000495768	CLDN12	GR	VM	-0.01211	0.01102	0.37927	0.02305	0.01094
ENST00000498326	CLDN12	STM	VL	-0.02112	0.01648	0.39179	0.03847	0.01735
ENST00000462636	CLDN12	STD	VM	-0.03684	0.00908	0.46797	0.12389	0.08706
ENST00000416322	CLDN12	GR	VM	-0.05639	0.02347	0.47858	0.0828	0.02641
ENST00000462636	CLDN12	GL	STD	0.03574	0.01285	0.53765	0.08815	0.12389
ENST00000495768	CLDN12	RF	STD	0.01187	0.05984	0.56178	0.00581	0.01768
ENST00000498326	CLDN12	STD	VL	-0.0327	0.01879	0.56645	0.05005	0.01735
ENST00000462636	CLDN12	GR	RF	-0.027	0.0706	0.57012	0.11325	0.08625
ENST00000287916	CLDN12	GL	STM	-0.22293	0.02428	0.64702	0.44325	0.22032
ENST00000394605	CLDN12	RF	STD	-0.06431	0.10456	0.65049	0.10094	0.03663
ENST00000495768	CLDN12	STM	VM	-0.00764	0.07827	0.656	0.01858	0.01094
ENST00000462636	CLDN12	RF	STM	0.03949	0.10901	0.65982	0.08625	0.12574
ENST00000462636	CLDN12	GL	STM	0.03759	0.02791	0.67042	0.08815	0.12574
ENST00000416322	CLDN12	GL	GR	0.04455	0.0516	0.68285	0.03825	0.0828
ENST00000462636	CLDN12	GR	VL	-0.03207	0.08821	0.68935	0.11325	0.08118
ENST00000394604	CLDN12	RF	STM	-0.03801	0.13336	0.69762	0.04706	0.00905
ENST00000394604	CLDN12	STM	VM	0.02412	0.10661	0.70758	0.00905	0.03318
ENST00000496677	CLDN12	GL	VM	0.15818	0.01138	0.73115	0.24935	0.40753
ENST00000498326	CLDN12	STM	VM	-0.00906	0.13139	0.73964	0.03847	0.02941
ENST00000462636	CLDN12	GL	GR	0.0251	0.08132	0.74346	0.08815	0.11325
ENST00000462636	CLDN12	STM	VL	-0.04456	0.15352	0.74662	0.12574	0.08118
ENST00000495768	CLDN12	GL	GR	0.0093	0.09516	0.76338	0.01375	0.02305
ENST00000496677	CLDN12	GR	VL	0.06136	0.13641	0.76347	0.3114	0.37276
ENST00000496677	CLDN12	GR	VM	0.09613	0.14871	0.7835	0.3114	0.40753
ENST00000496677	CLDN12	GL	STM	0.10965	0.07617	0.79767	0.24935	0.359
ENST00000394604	CLDN12	STD	STM	-0.02905	0.04682	0.7977	0.03811	0.00905
ENST00000498326	CLDN12	GL	STM	0.00722	0.08673	0.81445	0.03125	0.03847
ENST00000462636	CLDN12	GR	VM	-0.02619	0.18904	0.81972	0.11325	0.08706
ENST00000462636	CLDN12	STM	VM	-0.03868	0.22725	0.82756	0.12574	0.08706
ENST00000498326	CLDN12	GR	VL	-0.00995	0.21688	0.83311	0.0273	0.01735
ENST00000394605	CLDN12	RF	STM	-0.06073	0.29349	0.83852	0.10094	0.04021
ENST00000287916	CLDN12	GL	VL	-0.18319	0.03515	0.84072	0.44325	0.26006
ENST00000498326	CLDN12	RF	STM	0.00554	0.31112	0.84929	0.03294	0.03847
ENST00000496677	CLDN12	GL	STD	0.08018	0.14424	0.86309	0.24935	0.32953
ENST00000498033	CLDN12	STM	VM	0.00754	0.29604	0.86512	0.01405	0.02159
ENST00000394604	CLDN12	GL	STD	0.02036	0.15735	0.87089	0.01775	0.03811
ENST00000287916	CLDN12	GL	GR	-0.1254	0.21435	0.871	0.44325	0.31785
ENST00000416322	CLDN12	GL	RF	0.01769	0.15925	0.87416	0.03825	0.05594
ENST00000498326	CLDN12	STD	VM	-0.02064	0.16646	0.87516	0.05005	0.02941
ENST00000498326	CLDN12	GL	STD	0.0188	0.18597	0.88848	0.03125	0.05005
ENST00000495768	CLDN12	GR	VL	-0.00829	0.33381	0.89376	0.02305	0.01476
ENST00000287916	CLDN12	GR	VL	-0.05779	0.33795	0.89471	0.31785	0.26006
ENST00000416322	CLDN12	STD	VM	-0.01717	0.18967	0.89599	0.04358	0.02641
ENST00000498033	CLDN12	STD	VM	0.01317	0.19002	0.89599	0.00842	0.02159
ENST00000287916	CLDN12	GR	RF	-0.07291	0.42749	0.89662	0.31785	0.24494
ENST00000394605	CLDN12	STD	VL	0.08337	0.20897	0.90162	0.03663	0.12
ENST00000416322	CLDN12	GL	VL	0.01987	0.06326	0.91078	0.03825	0.05812
ENST00000498326	CLDN12	RF	STD	0.01712	0.49061	0.91162	0.03294	0.05005
ENST00000498326	CLDN12	GR	STD	0.02275	0.10765	0.91411	0.0273	0.05005
ENST00000495768	CLDN12	GL	STM	0.00483	0.21679	0.9147	0.01375	0.01858
ENST00000394605	CLDN12	GR	STD	-0.03897	0.11065	0.91513	0.0756	0.03663
ENST00000287916	CLDN12	STM	VL	0.03974	0.45559	0.91826	0.22032	0.26006
ENST00000394605	CLDN12	STM	VL	0.07979	0.46115	0.91955	0.04021	0.12
ENST00000496677	CLDN12	GL	GR	0.06205	0.31986	0.92099	0.24935	0.3114
ENST00000287916	CLDN12	GL	STD	-0.09957	0.26556	0.92259	0.44325	0.34368
ENST00000495768	CLDN12	STD	VM	-0.00674	0.27809	0.92878	0.01768	0.01094
ENST00000287916	CLDN12	RF	STM	-0.02462	0.51195	0.93046	0.24494	0.22032
ENST00000495768	CLDN12	GL	RF	-0.00794	0.28882	0.93241	0.01375	0.00581
ENST00000287916	CLDN12	GL	RF	-0.19831	0.31184	0.93691	0.44325	0.24494
ENST00000416322	CLDN12	GR	RF	-0.02686	0.56349	0.9371	0.0828	0.05594
ENST00000498033	CLDN12	GL	GR	-0.003	0.36311	0.938	0.0183	0.0153
ENST00000495768	CLDN12	STM	VL	-0.00381	0.52531	0.93853	0.01858	0.01476
ENST00000394604	CLDN12	GL	RF	0.02931	0.31599	0.93874	0.01775	0.04706
ENST00000416322	CLDN12	RF	STD	-0.01236	0.61987	0.94498	0.05594	0.04358
[truncated: 8,388 more rows]
