# Supplementary material for: A transcriptome atlas of leg muscles from healthy human volunteers reveals molecular and cellular signatures associated with muscle location
Source: eLife. 2023 Feb 6;12:e80500. doi: 10.7554/eLife.80500 (PMC9988256; doi:10.7554/eLife.80500)
Supplement: Supplementary file 6. [file elife-80500-supp6.xls]

## Sheet: overview
Supplementary Table S6. List of genes – modules.
ensembl gene id	The id based on ensembl version 98 (http://sep2019.archive.ensembl.org/).
hgnc symbol	Gene symbol based on ensembl version 98 (http://sep2019.archive.ensembl.org/).
gene biotype	Gene biotype extracted from ensembl version 98 (http://sep2019.archive.ensembl.org/).
module	The module to which the gene assigned based on the WGCNA (weighted gene co-expression network analysis). Genes that did not assign to any specific module labeled “grey”.
is hub?	TRUE if the gene is highly interconnected, FALSE otherwise.

## Sheet: SupplementaryTableS6
ensembl gene id	hgnc symbol	gene biotype	module	is hub?
ENSG00000000460	C1orf112	protein_coding	grey	FALSE
ENSG00000001460	STPG1	protein_coding	grey	FALSE
ENSG00000002919	SNX11	protein_coding	grey	FALSE
ENSG00000003096	KLHL13	protein_coding	grey	FALSE
ENSG00000004838	ZMYND10	protein_coding	grey	FALSE
ENSG00000004866	ST7	protein_coding	grey	FALSE
ENSG00000005801	ZNF195	protein_coding	grey	FALSE
ENSG00000006530	AGK	protein_coding	grey	FALSE
ENSG00000006837	CDKL3	protein_coding	grey	FALSE
ENSG00000007062	PROM1	protein_coding	grey	FALSE
ENSG00000007341	ST7L	protein_coding	grey	FALSE
ENSG00000008128	CDK11A	protein_coding	grey	FALSE
ENSG00000008277	ADAM22	protein_coding	grey	FALSE
ENSG00000008311	AASS	protein_coding	grey	FALSE
ENSG00000009954	BAZ1B	protein_coding	grey	FALSE
ENSG00000010244	ZNF207	protein_coding	grey	FALSE
ENSG00000010292	NCAPD2	protein_coding	grey	FALSE
ENSG00000010318	PHF7	protein_coding	grey	FALSE
ENSG00000013392	RWDD2A	protein_coding	grey	FALSE
ENSG00000016402	IL20RA	protein_coding	grey	FALSE
ENSG00000018189	RUFY3	protein_coding	grey	FALSE
ENSG00000018236	CNTN1	protein_coding	grey	FALSE
ENSG00000018280	SLC11A1	protein_coding	grey	FALSE
ENSG00000018869	ZNF582	protein_coding	grey	FALSE
ENSG00000023171	GRAMD1B	protein_coding	grey	FALSE
ENSG00000023318	ERP44	protein_coding	grey	FALSE
ENSG00000023839	ABCC2	protein_coding	grey	FALSE
ENSG00000028839	TBPL1	protein_coding	grey	FALSE
ENSG00000030304	MUSK	protein_coding	grey	FALSE
ENSG00000034533	ASTE1	protein_coding	grey	FALSE
ENSG00000037897	METTL1	protein_coding	grey	FALSE
ENSG00000040199	PHLPP2	protein_coding	grey	FALSE
ENSG00000040275	SPDL1	protein_coding	grey	FALSE
ENSG00000040531	CTNS	protein_coding	grey	FALSE
ENSG00000042088	TDP1	protein_coding	grey	FALSE
ENSG00000042317	SPATA7	protein_coding	grey	FALSE
ENSG00000042429	MED17	protein_coding	grey	FALSE
ENSG00000043143	JADE2	protein_coding	grey	FALSE
ENSG00000043514	TRIT1	protein_coding	grey	FALSE
ENSG00000044574	HSPA5	protein_coding	grey	FALSE
ENSG00000051180	RAD51	protein_coding	grey	FALSE
ENSG00000051596	THOC3	protein_coding	grey	FALSE
ENSG00000052802	MSMO1	protein_coding	grey	FALSE
ENSG00000053524	MCF2L2	protein_coding	grey	FALSE
ENSG00000053900	ANAPC4	protein_coding	grey	FALSE
ENSG00000054938	CHRDL2	protein_coding	grey	FALSE
ENSG00000056277	ZNF280C	protein_coding	grey	FALSE
ENSG00000056736	IL17RB	protein_coding	grey	FALSE
ENSG00000058799	YIPF1	protein_coding	grey	FALSE
ENSG00000059769	DNAJC25	protein_coding	grey	FALSE
ENSG00000059915	PSD	protein_coding	grey	FALSE
ENSG00000060642	PIGV	protein_coding	grey	FALSE
ENSG00000062370	ZNF112	protein_coding	grey	FALSE
ENSG00000064652	SNX24	protein_coding	grey	FALSE
ENSG00000064933	PMS1	protein_coding	grey	FALSE
ENSG00000065413	ANKRD44	protein_coding	grey	FALSE
ENSG00000065491	TBC1D22B	protein_coding	grey	FALSE
ENSG00000065548	ZC3H15	protein_coding	grey	FALSE
ENSG00000065600	PACC1	protein_coding	grey	FALSE
ENSG00000065621	GSTO2	protein_coding	grey	FALSE
ENSG00000066933	MYO9A	protein_coding	grey	FALSE
ENSG00000067601	PMS2P4	transcribed_unprocessed_pseudogene	grey	FALSE
ENSG00000068078	FGFR3	protein_coding	grey	FALSE
ENSG00000068438	FTSJ1	protein_coding	grey	FALSE
ENSG00000068885	IFT80	protein_coding	grey	FALSE
ENSG00000070269	TMEM260	protein_coding	grey	FALSE
ENSG00000070950	RAD18	protein_coding	grey	FALSE
ENSG00000071282	LMCD1	protein_coding	grey	FALSE
ENSG00000072571	HMMR	protein_coding	grey	FALSE
ENSG00000072756	TRNT1	protein_coding	grey	FALSE
ENSG00000072849	DERL2	protein_coding	grey	FALSE
ENSG00000073584	SMARCE1	protein_coding	grey	FALSE
ENSG00000075073	TACR2	protein_coding	grey	FALSE
ENSG00000075131	TIPIN	protein_coding	grey	FALSE
ENSG00000075240	GRAMD4	protein_coding	grey	FALSE
ENSG00000075340	ADD2	protein_coding	grey	FALSE
ENSG00000075407	ZNF37A	protein_coding	grey	FALSE
ENSG00000076003	MCM6	protein_coding	grey	FALSE
ENSG00000076351	SLC46A1	protein_coding	grey	FALSE
ENSG00000076382	SPAG5	protein_coding	grey	FALSE
ENSG00000078114	NEBL	protein_coding	grey	FALSE
ENSG00000078487	ZCWPW1	protein_coding	grey	FALSE
ENSG00000078549	ADCYAP1R1	protein_coding	grey	FALSE
ENSG00000080166	DCT	protein_coding	grey	FALSE
ENSG00000080298	RFX3	protein_coding	grey	FALSE
ENSG00000080608	PUM3	protein_coding	grey	FALSE
ENSG00000080815	PSEN1	protein_coding	grey	FALSE
ENSG00000081041	CXCL2	protein_coding	grey	FALSE
ENSG00000081181	ARG2	protein_coding	grey	FALSE
ENSG00000081818	PCDHB4	protein_coding	grey	FALSE
ENSG00000081853	PCDHGA2	protein_coding	grey	FALSE
ENSG00000082293	COL19A1	protein_coding	grey	FALSE
ENSG00000083093	PALB2	protein_coding	grey	FALSE
ENSG00000083535	PIBF1	protein_coding	grey	FALSE
ENSG00000083812	ZNF324	protein_coding	grey	FALSE
ENSG00000083814	ZNF671	protein_coding	grey	FALSE
ENSG00000083817	ZNF416	protein_coding	grey	FALSE
ENSG00000083896	YTHDC1	protein_coding	grey	FALSE
ENSG00000084444	FAM234B	protein_coding	grey	FALSE
ENSG00000084693	AGBL5	protein_coding	grey	FALSE
ENSG00000085831	TTC39A	protein_coding	grey	FALSE
ENSG00000086061	DNAJA1	protein_coding	grey	FALSE
ENSG00000086062	B4GALT1	protein_coding	grey	FALSE
ENSG00000086589	RBM22	protein_coding	grey	FALSE
ENSG00000086848	ALG9	protein_coding	grey	FALSE
ENSG00000087206	UIMC1	protein_coding	grey	FALSE
ENSG00000088451	TGDS	protein_coding	grey	FALSE
ENSG00000088726	TMEM40	protein_coding	grey	FALSE
ENSG00000088826	SMOX	protein_coding	grey	FALSE
ENSG00000089123	TASP1	protein_coding	grey	FALSE
ENSG00000089737	DDX24	protein_coding	grey	FALSE
ENSG00000090487	SPG21	protein_coding	grey	FALSE
ENSG00000092036	HAUS4	protein_coding	grey	FALSE
ENSG00000092330	TINF2	protein_coding	grey	FALSE
ENSG00000092871	RFFL	protein_coding	grey	FALSE
ENSG00000092978	GPATCH2	protein_coding	grey	FALSE
ENSG00000093217	XYLB	protein_coding	grey	FALSE
ENSG00000095539	SEMA4G	protein_coding	grey	FALSE
ENSG00000099625	CBARP	protein_coding	grey	FALSE
ENSG00000099958	DERL3	protein_coding	grey	FALSE
ENSG00000099999	RNF215	protein_coding	grey	FALSE
ENSG00000100150	DEPDC5	protein_coding	grey	FALSE
ENSG00000100170	SLC5A1	protein_coding	grey	FALSE
ENSG00000100221	JOSD1	protein_coding	grey	FALSE
ENSG00000100297	MCM5	protein_coding	grey	FALSE
ENSG00000100429	HDAC10	protein_coding	grey	FALSE
ENSG00000100461	RBM23	protein_coding	grey	FALSE
ENSG00000100478	AP4S1	protein_coding	grey	FALSE
ENSG00000100505	TRIM9	protein_coding	grey	FALSE
ENSG00000100526	CDKN3	protein_coding	grey	FALSE
ENSG00000100603	SNW1	protein_coding	grey	FALSE
ENSG00000100629	CEP128	protein_coding	grey	FALSE
ENSG00000100890	PRORP	protein_coding	grey	FALSE
ENSG00000101079	NDRG3	protein_coding	grey	FALSE
ENSG00000101096	NFATC2	protein_coding	grey	FALSE
ENSG00000101146	RAE1	protein_coding	grey	FALSE
ENSG00000101150	TPD52L2	protein_coding	grey	FALSE
ENSG00000101152	DNAJC5	protein_coding	grey	FALSE
ENSG00000101190	TCFL5	protein_coding	grey	FALSE
ENSG00000101361	NOP56	protein_coding	grey	FALSE
ENSG00000101417	PXMP4	protein_coding	grey	FALSE
ENSG00000101442	ACTR5	protein_coding	grey	FALSE
ENSG00000101751	POLI	protein_coding	grey	FALSE
ENSG00000101811	CSTF2	protein_coding	grey	FALSE
ENSG00000101888	NXT2	protein_coding	grey	FALSE
ENSG00000101935	AMMECR1	protein_coding	grey	FALSE
ENSG00000101951	PAGE4	protein_coding	grey	FALSE
ENSG00000101966	XIAP	protein_coding	grey	FALSE
ENSG00000102096	PIM2	protein_coding	grey	FALSE
ENSG00000102100	SLC35A2	protein_coding	grey	FALSE
ENSG00000102312	PORCN	protein_coding	grey	FALSE
ENSG00000102837	OLFM4	protein_coding	grey	FALSE
ENSG00000102900	NUP93	protein_coding	grey	FALSE
ENSG00000103174	NAGPA	protein_coding	grey	FALSE
ENSG00000103351	CLUAP1	protein_coding	grey	FALSE
ENSG00000103494	RPGRIP1L	protein_coding	grey	FALSE
ENSG00000103544	VPS35L	protein_coding	grey	FALSE
ENSG00000103671	TRIP4	protein_coding	grey	FALSE
ENSG00000104047	DTWD1	protein_coding	grey	FALSE
ENSG00000104299	INTS9	protein_coding	grey	FALSE
ENSG00000104313	EYA1	protein_coding	grey	FALSE
ENSG00000104356	POP1	protein_coding	grey	FALSE
ENSG00000104691	UBXN8	protein_coding	grey	FALSE
ENSG00000104835	SARS2	protein_coding	grey	FALSE
ENSG00000105072	C19orf44	protein_coding	grey	FALSE
ENSG00000105173	CCNE1	protein_coding	grey	FALSE
ENSG00000105486	LIG1	protein_coding	grey	FALSE
ENSG00000105612	DNASE2	protein_coding	grey	FALSE
ENSG00000105650	PDE4C	protein_coding	grey	FALSE
ENSG00000105750	ZNF85	protein_coding	grey	FALSE
ENSG00000105829	BET1	protein_coding	grey	FALSE
ENSG00000105849	TWISTNB	protein_coding	grey	FALSE
ENSG00000105852	PON3	protein_coding	grey	FALSE
ENSG00000105948	TTC26	protein_coding	grey	FALSE
ENSG00000106012	IQCE	protein_coding	grey	FALSE
ENSG00000106089	STX1A	protein_coding	grey	FALSE
ENSG00000106113	CRHR2	protein_coding	grey	FALSE
ENSG00000106302	HYAL4	protein_coding	grey	FALSE
ENSG00000106336	FBXO24	protein_coding	grey	FALSE
ENSG00000106346	USP42	protein_coding	grey	FALSE
ENSG00000106415	GLCCI1	protein_coding	grey	FALSE
ENSG00000106617	PRKAG2	protein_coding	grey	FALSE
ENSG00000107104	KANK1	protein_coding	grey	FALSE
ENSG00000107242	PIP5K1B	protein_coding	grey	FALSE
ENSG00000107249	GLIS3	protein_coding	grey	FALSE
ENSG00000107371	EXOSC3	protein_coding	grey	FALSE
ENSG00000107485	GATA3	protein_coding	grey	FALSE
ENSG00000107625	DDX50	protein_coding	grey	FALSE
ENSG00000107960	STN1	protein_coding	grey	FALSE
ENSG00000108039	XPNPEP1	protein_coding	grey	FALSE
ENSG00000108306	FBXL20	protein_coding	grey	FALSE
ENSG00000108433	GOSR2	protein_coding	grey	FALSE
ENSG00000108578	BLMH	protein_coding	grey	FALSE
ENSG00000108590	MED31	protein_coding	grey	FALSE
ENSG00000109220	CHIC2	protein_coding	grey	FALSE
ENSG00000109321	AREG	protein_coding	grey	FALSE
ENSG00000109339	MAPK10	protein_coding	grey	FALSE
ENSG00000109534	GAR1	protein_coding	grey	FALSE
ENSG00000109680	TBC1D19	protein_coding	grey	FALSE
ENSG00000109689	STIM2	protein_coding	grey	FALSE
ENSG00000109794	FAM149A	protein_coding	grey	FALSE
ENSG00000110025	SNX15	protein_coding	grey	FALSE
ENSG00000110801	PSMD9	protein_coding	grey	FALSE
ENSG00000111241	FGF6	protein_coding	grey	FALSE
ENSG00000111254	AKAP3	protein_coding	grey	FALSE
ENSG00000111361	EIF2B1	protein_coding	grey	FALSE
ENSG00000111424	VDR	protein_coding	grey	FALSE
ENSG00000111707	SUDS3	protein_coding	grey	FALSE
ENSG00000111728	ST8SIA1	protein_coding	grey	FALSE
ENSG00000111834	RSPH4A	protein_coding	grey	FALSE
ENSG00000111845	PAK1IP1	protein_coding	grey	FALSE
ENSG00000112029	FBXO5	protein_coding	grey	FALSE
ENSG00000112039	FANCE	protein_coding	grey	FALSE
ENSG00000112081	SRSF3	protein_coding	grey	FALSE
ENSG00000112149	CD83	protein_coding	grey	FALSE
ENSG00000112167	SAYSD1	protein_coding	grey	FALSE
ENSG00000112394	SLC16A10	protein_coding	grey	FALSE
ENSG00000112530	PACRG	protein_coding	grey	FALSE
ENSG00000112877	CEP72	protein_coding	grey	FALSE
ENSG00000112983	BRD8	protein_coding	grey	FALSE
ENSG00000113209	PCDHB5	protein_coding	grey	FALSE
ENSG00000113356	POLR3G	protein_coding	grey	FALSE
ENSG00000113460	BRIX1	protein_coding	grey	FALSE
ENSG00000113734	BNIP1	protein_coding	grey	FALSE
ENSG00000113761	ZNF346	protein_coding	grey	FALSE
ENSG00000115112	TFCP2L1	protein_coding	grey	FALSE
ENSG00000115239	ASB3	protein_coding	grey	FALSE
ENSG00000115514	TXNDC9	protein_coding	grey	FALSE
ENSG00000115526	CHST10	protein_coding	grey	FALSE
ENSG00000115604	IL18R1	protein_coding	grey	FALSE
ENSG00000115657	ABCB6	protein_coding	grey	FALSE
ENSG00000115828	QPCT	protein_coding	grey	FALSE
ENSG00000115841	RMDN2	protein_coding	grey	FALSE
ENSG00000115875	SRSF7	protein_coding	grey	FALSE
ENSG00000115998	C2orf42	protein_coding	grey	FALSE
ENSG00000116212	LRRC42	protein_coding	grey	FALSE
ENSG00000116260	QSOX1	protein_coding	grey	FALSE
ENSG00000116514	RNF19B	protein_coding	grey	FALSE
ENSG00000116668	SWT1	protein_coding	grey	FALSE
ENSG00000116675	DNAJC6	protein_coding	grey	FALSE
ENSG00000116754	SRSF11	protein_coding	grey	FALSE
ENSG00000116830	TTF2	protein_coding	grey	FALSE
ENSG00000116885	OSCP1	protein_coding	grey	FALSE
ENSG00000116990	MYCL	protein_coding	grey	FALSE
ENSG00000117010	ZNF684	protein_coding	grey	FALSE
ENSG00000117262	GPR89A	protein_coding	grey	FALSE
ENSG00000117362	APH1A	protein_coding	grey	FALSE
ENSG00000117481	NSUN4	protein_coding	grey	FALSE
ENSG00000117594	HSD11B1	protein_coding	grey	FALSE
ENSG00000117862	TXNDC12	protein_coding	grey	FALSE
ENSG00000117877	CD3EAP	protein_coding	grey	FALSE
ENSG00000118058	KMT2A	protein_coding	grey	FALSE
ENSG00000118156	ZNF541	protein_coding	grey	FALSE
ENSG00000118369	USP35	protein_coding	grey	FALSE
ENSG00000118420	UBE3D	protein_coding	grey	FALSE
ENSG00000118514	ALDH8A1	protein_coding	grey	FALSE
ENSG00000118620	ZNF430	protein_coding	grey	FALSE
ENSG00000119227	PIGZ	protein_coding	grey	FALSE
ENSG00000119326	CTNNAL1	protein_coding	grey	FALSE
ENSG00000119328	ABITRAM	protein_coding	grey	FALSE
ENSG00000119661	DNAL1	protein_coding	grey	FALSE
ENSG00000119977	TCTN3	protein_coding	grey	FALSE
ENSG00000119979	DENND10	protein_coding	grey	FALSE
ENSG00000120217	CD274	protein_coding	grey	FALSE
ENSG00000120539	MASTL	protein_coding	grey	FALSE
ENSG00000121390	PSPC1	protein_coding	grey	FALSE
ENSG00000121542	SEC22A	protein_coding	grey	FALSE
ENSG00000121775	TMEM39B	protein_coding	grey	FALSE
ENSG00000121903	ZSCAN20	protein_coding	grey	FALSE
ENSG00000121966	CXCR4	protein_coding	grey	FALSE
ENSG00000122557	HERPUD2	protein_coding	grey	FALSE
ENSG00000122674	CCZ1	protein_coding	grey	FALSE
ENSG00000122778	KIAA1549	protein_coding	grey	FALSE
ENSG00000123600	METTL8	protein_coding	grey	FALSE
ENSG00000123810	B9D2	protein_coding	grey	FALSE
ENSG00000123965	PMS2P5	unprocessed_pseudogene	grey	FALSE
ENSG00000123975	CKS2	protein_coding	grey	FALSE
ENSG00000124160	NCOA5	protein_coding	grey	FALSE
ENSG00000124171	PARD6B	protein_coding	grey	FALSE
ENSG00000124193	SRSF6	protein_coding	grey	FALSE
ENSG00000124802	EEF1E1	protein_coding	grey	FALSE
ENSG00000124935	SCGB1D2	protein_coding	grey	FALSE
ENSG00000125122	LRRC29	protein_coding	grey	FALSE
ENSG00000125388	GRK4	protein_coding	grey	FALSE
ENSG00000125675	GRIA3	protein_coding	grey	FALSE
ENSG00000125779	PANK2	protein_coding	grey	FALSE
ENSG00000125814	NAPB	protein_coding	grey	FALSE
ENSG00000126070	AGO3	protein_coding	grey	FALSE
ENSG00000126773	PCNX4	protein_coding	grey	FALSE
ENSG00000126790	L3HYPDH	protein_coding	grey	FALSE
ENSG00000127191	TRAF2	protein_coding	grey	FALSE
ENSG00000127364	TAS2R4	protein_coding	grey	FALSE
ENSG00000127720	METTL25	protein_coding	grey	FALSE
ENSG00000127989	MTERF1	protein_coding	grey	FALSE
ENSG00000128039	SRD5A3	protein_coding	grey	FALSE
ENSG00000128513	POT1	protein_coding	grey	FALSE
ENSG00000128829	EIF2AK4	protein_coding	grey	FALSE
ENSG00000128918	ALDH1A2	protein_coding	grey	FALSE
ENSG00000129214	SHBG	protein_coding	grey	FALSE
ENSG00000129518	EAPP	protein_coding	grey	FALSE
ENSG00000129988	LBP	protein_coding	grey	FALSE
ENSG00000130038	CRACR2A	protein_coding	grey	FALSE
ENSG00000130226	DPP6	protein_coding	grey	FALSE
ENSG00000130363	RSPH3	protein_coding	grey	FALSE
ENSG00000130783	CCDC62	protein_coding	grey	FALSE
ENSG00000130810	PPAN	protein_coding	grey	FALSE
ENSG00000131043	AAR2	protein_coding	grey	FALSE
ENSG00000131398	KCNC3	protein_coding	grey	FALSE
ENSG00000131437	KIF3A	protein_coding	grey	FALSE
ENSG00000131732	ZCCHC9	protein_coding	grey	FALSE
ENSG00000131781	FMO5	protein_coding	grey	FALSE
ENSG00000131788	PIAS3	protein_coding	grey	FALSE
ENSG00000131871	SELENOS	protein_coding	grey	FALSE
ENSG00000131876	SNRPA1	protein_coding	grey	FALSE
ENSG00000132016	C19orf57	protein_coding	grey	FALSE
ENSG00000132141	CCT6B	protein_coding	grey	FALSE
ENSG00000132196	HSD17B7	protein_coding	grey	FALSE
ENSG00000132275	RRP8	protein_coding	grey	FALSE
ENSG00000132330	SCLY	protein_coding	grey	FALSE
ENSG00000132466	ANKRD17	protein_coding	grey	FALSE
ENSG00000132467	UTP3	protein_coding	grey	FALSE
ENSG00000132603	NIP7	protein_coding	grey	FALSE
ENSG00000132623	ANKEF1	protein_coding	grey	FALSE
ENSG00000132646	PCNA	protein_coding	grey	FALSE
ENSG00000132781	MUTYH	protein_coding	grey	FALSE
ENSG00000132801	ZSWIM3	protein_coding	grey	FALSE
ENSG00000132824	SERINC3	protein_coding	grey	FALSE
ENSG00000132846	ZBED3	protein_coding	grey	FALSE
ENSG00000132881	CPLANE2	protein_coding	grey	FALSE
ENSG00000132967	HMGB1P5	transcribed_processed_pseudogene	grey	FALSE
ENSG00000133119	RFC3	protein_coding	grey	FALSE
ENSG00000133193	FAM104A	protein_coding	grey	FALSE
ENSG00000133302	SLF1	protein_coding	grey	FALSE
ENSG00000133627	ACTR3B	protein_coding	grey	FALSE
ENSG00000133678	TMEM254	protein_coding	grey	FALSE
ENSG00000133710	SPINK5	protein_coding	grey	FALSE
ENSG00000133740	E2F5	protein_coding	grey	FALSE
ENSG00000133985	TTC9	protein_coding	grey	FALSE
ENSG00000134042	MRO	protein_coding	grey	FALSE
ENSG00000134057	CCNB1	protein_coding	grey	FALSE
ENSG00000134086	VHL	protein_coding	grey	FALSE
ENSG00000134107	BHLHE40	protein_coding	grey	FALSE
ENSG00000134207	SYT6	protein_coding	grey	FALSE
ENSG00000134480	CCNH	protein_coding	grey	FALSE
ENSG00000134899	ERCC5	protein_coding	grey	FALSE
ENSG00000135090	TAOK3	protein_coding	grey	FALSE
ENSG00000135205	CCDC146	protein_coding	grey	FALSE
ENSG00000135250	SRPK2	protein_coding	grey	FALSE
ENSG00000135315	CEP162	protein_coding	grey	FALSE
ENSG00000135338	LCA5	protein_coding	grey	FALSE
ENSG00000135365	PHF21A	protein_coding	grey	FALSE
ENSG00000135392	DNAJC14	protein_coding	grey	FALSE
ENSG00000135426	TESPA1	protein_coding	grey	FALSE
ENSG00000135437	RDH5	protein_coding	grey	FALSE
ENSG00000135486	HNRNPA1	protein_coding	grey	FALSE
ENSG00000135525	MAP7	protein_coding	grey	FALSE
ENSG00000135605	TEC	protein_coding	grey	FALSE
ENSG00000135845	PIGC	protein_coding	grey	FALSE
ENSG00000135951	TSGA10	protein_coding	grey	FALSE
ENSG00000135953	MFSD9	protein_coding	grey	FALSE
ENSG00000136045	PWP1	protein_coding	grey	FALSE
ENSG00000136099	PCDH8	protein_coding	grey	FALSE
ENSG00000136122	BORA	protein_coding	grey	FALSE
ENSG00000136161	RCBTB2	protein_coding	grey	FALSE
ENSG00000136169	SETDB2	protein_coding	grey	FALSE
ENSG00000136319	TTC5	protein_coding	grey	FALSE
ENSG00000136485	DCAF7	protein_coding	grey	FALSE
ENSG00000136709	WDR33	protein_coding	grey	FALSE
ENSG00000136824	SMC2	protein_coding	grey	FALSE
ENSG00000136827	TOR1A	protein_coding	grey	FALSE
ENSG00000136932	TRMO	protein_coding	grey	FALSE
ENSG00000136982	DSCC1	protein_coding	grey	FALSE
ENSG00000137133	HINT2	protein_coding	grey	FALSE
ENSG00000137185	ZSCAN9	protein_coding	grey	FALSE
ENSG00000137193	PIM1	protein_coding	grey	FALSE
ENSG00000137338	PGBD1	protein_coding	grey	FALSE
ENSG00000137558	PI15	protein_coding	grey	FALSE
ENSG00000137814	HAUS2	protein_coding	grey	FALSE
ENSG00000137825	ITPKA	protein_coding	grey	FALSE
ENSG00000137878	GCOM1	protein_coding	grey	FALSE
ENSG00000137947	GTF2B	protein_coding	grey	FALSE
ENSG00000137968	SLC44A5	protein_coding	grey	FALSE
ENSG00000138050	THUMPD2	protein_coding	grey	FALSE
ENSG00000138111	MFSD13A	protein_coding	grey	FALSE
ENSG00000138375	SMARCAL1	protein_coding	grey	FALSE
ENSG00000138395	CDK15	protein_coding	grey	FALSE
ENSG00000138400	MDH1B	protein_coding	grey	FALSE
ENSG00000138443	ABI2	protein_coding	grey	FALSE
ENSG00000138587	MNS1	protein_coding	grey	FALSE
ENSG00000138642	HERC6	protein_coding	grey	FALSE
ENSG00000138670	RASGEF1B	protein_coding	grey	FALSE
ENSG00000138696	BMPR1B	protein_coding	grey	FALSE
ENSG00000139192	TAPBPL	protein_coding	grey	FALSE
ENSG00000139344	AMDHD1	protein_coding	grey	FALSE
ENSG00000139372	TDG	protein_coding	grey	FALSE
ENSG00000139546	TARBP2	protein_coding	grey	FALSE
ENSG00000139974	SLC38A6	protein_coding	grey	FALSE
ENSG00000140006	WDR89	protein_coding	grey	FALSE
ENSG00000140022	STON2	protein_coding	grey	FALSE
ENSG00000140025	EFCAB11	protein_coding	grey	FALSE
ENSG00000140153	WDR20	protein_coding	grey	FALSE
ENSG00000140395	WDR61	protein_coding	grey	FALSE
ENSG00000140455	USP3	protein_coding	grey	FALSE
ENSG00000140465	CYP1A1	protein_coding	grey	FALSE
ENSG00000140470	ADAMTS17	protein_coding	grey	FALSE
ENSG00000140543	DET1	protein_coding	grey	FALSE
ENSG00000140650	PMM2	protein_coding	grey	FALSE
ENSG00000140854	KATNB1	protein_coding	grey	FALSE
ENSG00000140955	ADAD2	protein_coding	grey	FALSE
ENSG00000140987	ZSCAN32	protein_coding	grey	FALSE
ENSG00000140993	TIGD7	protein_coding	grey	FALSE
ENSG00000141013	GAS8	protein_coding	grey	FALSE
ENSG00000141127	PRPSAP2	protein_coding	grey	FALSE
ENSG00000141198	TOM1L1	protein_coding	grey	FALSE
ENSG00000141337	ARSG	protein_coding	grey	FALSE
ENSG00000141384	TAF4B	protein_coding	grey	FALSE
ENSG00000141452	RMC1	protein_coding	grey	FALSE
ENSG00000141458	NPC1	protein_coding	grey	FALSE
ENSG00000141639	MAPK4	protein_coding	grey	FALSE
ENSG00000141642	ELAC1	protein_coding	grey	FALSE
ENSG00000141682	PMAIP1	protein_coding	grey	FALSE
ENSG00000141699	RETREG3	protein_coding	grey	FALSE
ENSG00000141956	PRDM15	protein_coding	grey	FALSE
ENSG00000142185	TRPM2	protein_coding	grey	FALSE
ENSG00000142188	TMEM50B	protein_coding	grey	FALSE
ENSG00000142408	CACNG8	protein_coding	grey	FALSE
ENSG00000142794	NBPF3	protein_coding	grey	FALSE
ENSG00000142973	CYP4B1	protein_coding	grey	FALSE
ENSG00000143179	UCK2	protein_coding	grey	FALSE
ENSG00000143190	POU2F1	protein_coding	grey	FALSE
ENSG00000143322	ABL2	protein_coding	grey	FALSE
ENSG00000143622	RIT1	protein_coding	grey	FALSE
ENSG00000143630	HCN3	protein_coding	grey	FALSE
ENSG00000143633	C1orf131	protein_coding	grey	FALSE
ENSG00000143786	CNIH3	protein_coding	grey	FALSE
ENSG00000143842	SOX13	protein_coding	grey	FALSE
ENSG00000143951	WDPCP	protein_coding	grey	FALSE
ENSG00000144048	DUSP11	protein_coding	grey	FALSE
ENSG00000144061	NPHP1	protein_coding	grey	FALSE
ENSG00000144063	MALL	protein_coding	grey	FALSE
ENSG00000144118	RALB	protein_coding	grey	FALSE
ENSG00000144214	LYG1	protein_coding	grey	FALSE
ENSG00000144451	SPAG16	protein_coding	grey	FALSE
ENSG00000144460	NYAP2	protein_coding	grey	FALSE
ENSG00000144535	DIS3L2	protein_coding	grey	FALSE
ENSG00000144559	TAMM41	protein_coding	grey	FALSE
ENSG00000145388	METTL14	protein_coding	grey	FALSE
ENSG00000145545	SRD5A1	protein_coding	grey	FALSE
ENSG00000145604	SKP2	protein_coding	grey	FALSE
ENSG00000145736	GTF2H2	protein_coding	grey	FALSE
ENSG00000145819	ARHGAP26	protein_coding	grey	FALSE
ENSG00000145934	TENM2	protein_coding	grey	FALSE
ENSG00000146143	PRIM2	protein_coding	grey	FALSE
ENSG00000146223	RPL7L1	protein_coding	grey	FALSE
ENSG00000146233	CYP39A1	protein_coding	grey	FALSE
ENSG00000146243	IRAK1BP1	protein_coding	grey	FALSE
ENSG00000146263	MMS22L	protein_coding	grey	FALSE
ENSG00000146426	TIAM2	protein_coding	grey	FALSE
ENSG00000146574	CCZ1B	protein_coding	grey	FALSE
ENSG00000146670	CDCA5	protein_coding	grey	FALSE
ENSG00000146856	AGBL3	protein_coding	grey	FALSE
ENSG00000146938	NLGN4X	protein_coding	grey	FALSE
ENSG00000147118	ZNF182	protein_coding	grey	FALSE
ENSG00000147174	GCNA	protein_coding	grey	FALSE
ENSG00000147383	NSDHL	protein_coding	grey	FALSE
ENSG00000147437	GNRH1	protein_coding	grey	FALSE
ENSG00000147679	UTP23	protein_coding	grey	FALSE
ENSG00000147996	CBWD5	protein_coding	grey	FALSE
ENSG00000148019	CEP78	protein_coding	grey	FALSE
ENSG00000148219	ASTN2	protein_coding	grey	FALSE
ENSG00000148225	WDR31	protein_coding	grey	FALSE
ENSG00000148835	TAF5	protein_coding	grey	FALSE
ENSG00000149256	TENM4	protein_coding	grey	FALSE
ENSG00000149262	INTS4	protein_coding	grey	FALSE
ENSG00000149295	DRD2	protein_coding	grey	FALSE
ENSG00000149328	GLB1L2	protein_coding	grey	FALSE
ENSG00000149346	SLX4IP	protein_coding	grey	FALSE
ENSG00000150433	TMEM218	protein_coding	grey	FALSE
ENSG00000150477	KIAA1328	protein_coding	grey	FALSE
ENSG00000150636	CCDC102B	protein_coding	grey	FALSE
ENSG00000150672	DLG2	protein_coding	grey	FALSE
ENSG00000150756	ATPSCKMT	protein_coding	grey	FALSE
ENSG00000151065	DCP1B	protein_coding	grey	FALSE
ENSG00000151164	RAD9B	protein_coding	grey	FALSE
ENSG00000151287	TEX30	protein_coding	grey	FALSE
ENSG00000151327	FAM177A1	protein_coding	grey	FALSE
ENSG00000151332	MBIP	protein_coding	grey	FALSE
ENSG00000151445	VIPAS39	protein_coding	grey	FALSE
ENSG00000151502	VPS26B	protein_coding	grey	FALSE
ENSG00000151657	KIN	protein_coding	grey	FALSE
ENSG00000151725	CENPU	protein_coding	grey	FALSE
ENSG00000151773	CCDC122	protein_coding	grey	FALSE
ENSG00000151881	TMEM267	protein_coding	grey	FALSE
ENSG00000151917	BEND6	protein_coding	grey	FALSE
ENSG00000152147	GEMIN6	protein_coding	grey	FALSE
ENSG00000152422	XRCC4	protein_coding	grey	FALSE
ENSG00000152433	ZNF547	protein_coding	grey	FALSE
ENSG00000152672	CLEC4F	protein_coding	grey	FALSE
ENSG00000152760	TCTEX1D1	protein_coding	grey	FALSE
ENSG00000152763	WDR78	protein_coding	grey	FALSE
ENSG00000152767	FARP1	protein_coding	grey	FALSE
ENSG00000153037	SRP19	protein_coding	grey	FALSE
ENSG00000153044	CENPH	protein_coding	grey	FALSE
ENSG00000153140	CETN3	protein_coding	grey	FALSE
ENSG00000153234	NR4A2	protein_coding	grey	FALSE
ENSG00000153303	FRMD1	protein_coding	grey	FALSE
ENSG00000153487	ING1	protein_coding	grey	FALSE
ENSG00000153832	FBXO36	protein_coding	grey	FALSE
ENSG00000153896	ZNF599	protein_coding	grey	FALSE
ENSG00000153975	ZUP1	protein_coding	grey	FALSE
ENSG00000153982	GDPD1	protein_coding	grey	FALSE
ENSG00000154144	TBRG1	protein_coding	grey	FALSE
ENSG00000154328	NEIL2	protein_coding	grey	FALSE
ENSG00000154330	PGM5	protein_coding	grey	FALSE
ENSG00000154655	L3MBTL4	protein_coding	grey	FALSE
ENSG00000154710	RABGEF1	protein_coding	grey	FALSE
ENSG00000154743	TSEN2	protein_coding	grey	FALSE
ENSG00000154928	EPHB1	protein_coding	grey	FALSE
ENSG00000155011	DKK2	protein_coding	grey	FALSE
ENSG00000155016	CYP2U1	protein_coding	grey	FALSE
ENSG00000155252	PI4K2A	protein_coding	grey	FALSE
ENSG00000155858	LSM11	protein_coding	grey	FALSE
ENSG00000155974	GRIP1	protein_coding	grey	FALSE
ENSG00000156049	GNA14	protein_coding	grey	FALSE
ENSG00000156345	CDK20	protein_coding	grey	FALSE
ENSG00000156384	SFR1	protein_coding	grey	FALSE
ENSG00000156650	KAT6B	protein_coding	grey	FALSE
ENSG00000156802	ATAD2	protein_coding	grey	FALSE
ENSG00000156869	FRRS1	protein_coding	grey	FALSE
ENSG00000156876	SASS6	protein_coding	grey	FALSE
ENSG00000156973	PDE6D	protein_coding	grey	FALSE
ENSG00000157181	ODR4	protein_coding	grey	FALSE
ENSG00000157470	FAM81A	protein_coding	grey	FALSE
ENSG00000157657	ZNF618	protein_coding	grey	FALSE
ENSG00000157764	BRAF	protein_coding	grey	FALSE
ENSG00000157869	RAB28	protein_coding	grey	FALSE
ENSG00000157954	WIPI2	protein_coding	grey	FALSE
ENSG00000157992	KRTCAP3	protein_coding	grey	FALSE
ENSG00000158050	DUSP2	protein_coding	grey	FALSE
ENSG00000158169	FANCC	protein_coding	grey	FALSE
ENSG00000158220	ESYT3	protein_coding	grey	FALSE
ENSG00000158296	SLC13A3	protein_coding	grey	FALSE
ENSG00000158458	NRG2	protein_coding	grey	FALSE
ENSG00000158481	CD1C	protein_coding	grey	FALSE
ENSG00000158486	DNAH3	protein_coding	grey	FALSE
ENSG00000158715	SLC45A3	protein_coding	grey	FALSE
ENSG00000159055	MIS18A	protein_coding	grey	FALSE
ENSG00000159202	UBE2Z	protein_coding	grey	FALSE
ENSG00000159208	CIART	protein_coding	grey	FALSE
ENSG00000159212	CLIC6	protein_coding	grey	FALSE
ENSG00000159885	ZNF222	protein_coding	grey	FALSE
ENSG00000159899	NPR2	protein_coding	grey	FALSE
ENSG00000159917	ZNF235	protein_coding	grey	FALSE
ENSG00000159958	TNFRSF13C	protein_coding	grey	FALSE
ENSG00000160051	IQCC	protein_coding	grey	FALSE
ENSG00000160172	FAM86C2P	transcribed_unprocessed_pseudogene	grey	FALSE
ENSG00000160193	WDR4	protein_coding	grey	FALSE
ENSG00000160201	U2AF1	protein_coding	grey	FALSE
ENSG00000160345	C9orf116	protein_coding	grey	FALSE
ENSG00000160563	MED27	protein_coding	grey	FALSE
ENSG00000160908	ZNF394	protein_coding	grey	FALSE
ENSG00000161328	LRRC56	protein_coding	grey	FALSE
ENSG00000161956	SENP3	protein_coding	grey	FALSE
ENSG00000162063	CCNF	protein_coding	grey	FALSE
ENSG00000162174	ASRGL1	protein_coding	grey	FALSE
ENSG00000162543	UBXN10	protein_coding	grey	FALSE
ENSG00000162599	NFIA	protein_coding	grey	FALSE
ENSG00000162757	C1orf74	protein_coding	grey	FALSE
ENSG00000162836	ACP6	protein_coding	grey	FALSE
ENSG00000162924	REL	protein_coding	grey	FALSE
ENSG00000162929	KIAA1841	protein_coding	grey	FALSE
ENSG00000162981	LRATD1	protein_coding	grey	FALSE
ENSG00000162994	CLHC1	protein_coding	grey	FALSE
ENSG00000163002	NUP35	protein_coding	grey	FALSE
ENSG00000163006	CCDC138	protein_coding	grey	FALSE
ENSG00000163041	H3F3A	protein_coding	grey	FALSE
ENSG00000163071	SPATA18	protein_coding	grey	FALSE
ENSG00000163093	BBS5	protein_coding	grey	FALSE
ENSG00000163141	BNIPL	protein_coding	grey	FALSE
ENSG00000163214	DHX57	protein_coding	grey	FALSE
ENSG00000163257	DCAF16	protein_coding	grey	FALSE
ENSG00000163406	SLC15A2	protein_coding	grey	FALSE
ENSG00000163485	ADORA1	protein_coding	grey	FALSE
ENSG00000163507	CIP2A	protein_coding	grey	FALSE
ENSG00000163596	ICA1L	protein_coding	grey	FALSE
ENSG00000163655	GMPS	protein_coding	grey	FALSE
ENSG00000163794	UCN	protein_coding	grey	FALSE
ENSG00000163803	PLB1	protein_coding	grey	FALSE
ENSG00000163950	SLBP	protein_coding	grey	FALSE
ENSG00000164002	EXO5	protein_coding	grey	FALSE
ENSG00000164011	ZNF691	protein_coding	grey	FALSE
ENSG00000164045	CDC25A	protein_coding	grey	FALSE
ENSG00000164053	ATRIP	protein_coding	grey	FALSE
ENSG00000164056	SPRY1	protein_coding	grey	FALSE
ENSG00000164066	INTU	protein_coding	grey	FALSE
ENSG00000164105	SAP30	protein_coding	grey	FALSE
ENSG00000164117	FBXO8	protein_coding	grey	FALSE
ENSG00000164124	TMEM144	protein_coding	grey	FALSE
ENSG00000164162	ANAPC10	protein_coding	grey	FALSE
ENSG00000164167	LSM6	protein_coding	grey	FALSE
ENSG00000164169	PRMT9	protein_coding	grey	FALSE
ENSG00000164305	CASP3	protein_coding	grey	FALSE
ENSG00000164306	PRIMPOL	protein_coding	grey	FALSE
ENSG00000164344	KLKB1	protein_coding	grey	FALSE
ENSG00000164406	LEAP2	protein_coding	grey	FALSE
ENSG00000164509	IL31RA	protein_coding	grey	FALSE
ENSG00000164543	STK17A	protein_coding	grey	FALSE
ENSG00000164758	MED30	protein_coding	grey	FALSE
ENSG00000164815	ORC5	protein_coding	grey	FALSE
ENSG00000164934	DCAF13	protein_coding	grey	FALSE
ENSG00000164989	CCDC171	protein_coding	grey	FALSE
ENSG00000165055	METTL2B	protein_coding	grey	FALSE
ENSG00000165115	KIF27	protein_coding	grey	FALSE
ENSG00000165118	C9orf64	protein_coding	grey	FALSE
ENSG00000165121		transcribed_unprocessed_pseudogene	grey	FALSE
ENSG00000165186	PTCHD1	protein_coding	grey	FALSE
ENSG00000165209	STRBP	protein_coding	grey	FALSE
ENSG00000165449	SLC16A9	protein_coding	grey	FALSE
ENSG00000165475	CRYL1	protein_coding	grey	FALSE
ENSG00000165490	DDIAS	protein_coding	grey	FALSE
ENSG00000165568	AKR1E2	protein_coding	grey	FALSE
ENSG00000165630	PRPF18	protein_coding	grey	FALSE
ENSG00000165704	HPRT1	protein_coding	grey	FALSE
ENSG00000165782	PIP4P1	protein_coding	grey	FALSE
ENSG00000165816	VWA2	protein_coding	grey	FALSE
ENSG00000165914	TTC7B	protein_coding	grey	FALSE
ENSG00000166002	SMCO4	protein_coding	grey	FALSE
ENSG00000166004	CEP295	protein_coding	grey	FALSE
ENSG00000166024	R3HCC1L	protein_coding	grey	FALSE
ENSG00000166246	C16orf71	protein_coding	grey	FALSE
ENSG00000166446	CDYL2	protein_coding	grey	FALSE
ENSG00000166450	PRTG	protein_coding	grey	FALSE
ENSG00000166704	ZNF606	protein_coding	grey	FALSE
ENSG00000166923	GREM1	protein_coding	grey	FALSE
ENSG00000166946	CCNDBP1	protein_coding	grey	FALSE
ENSG00000167034	NKX3-1	protein_coding	grey	FALSE
ENSG00000167130	DOLPP1	protein_coding	grey	FALSE
ENSG00000167196	FBXO22	protein_coding	grey	FALSE
ENSG00000167216	KATNAL2	protein_coding	grey	FALSE
ENSG00000167220	HDHD2	protein_coding	grey	FALSE
ENSG00000167384	ZNF180	protein_coding	grey	FALSE
ENSG00000167395	ZNF646	protein_coding	grey	FALSE
ENSG00000167397	VKORC1	protein_coding	grey	FALSE
ENSG00000167522	ANKRD11	protein_coding	grey	FALSE
ENSG00000167554	ZNF610	protein_coding	grey	FALSE
ENSG00000167555	ZNF528	protein_coding	grey	FALSE
ENSG00000167562	ZNF701	protein_coding	grey	FALSE
ENSG00000167637	ZNF283	protein_coding	grey	FALSE
ENSG00000167740	CYB5D2	protein_coding	grey	FALSE
ENSG00000167785	ZNF558	protein_coding	grey	FALSE
ENSG00000167840	ZNF232	protein_coding	grey	FALSE
ENSG00000167981	ZNF597	protein_coding	grey	FALSE
ENSG00000168005	SPINDOC	protein_coding	grey	FALSE
ENSG00000168280	KIF5C	protein_coding	grey	FALSE
ENSG00000168297	PXK	protein_coding	grey	FALSE
ENSG00000168301	KCTD6	protein_coding	grey	FALSE
ENSG00000168329	CX3CR1	protein_coding	grey	FALSE
ENSG00000168491	CCDC110	protein_coding	grey	FALSE
ENSG00000168502	MTCL1	protein_coding	grey	FALSE
ENSG00000168646	AXIN2	protein_coding	grey	FALSE
ENSG00000168772	CXXC4	protein_coding	grey	FALSE
ENSG00000168806	LCMT2	protein_coding	grey	FALSE
ENSG00000169019	COMMD8	protein_coding	grey	FALSE
ENSG00000169203	NPIPB12	protein_coding	grey	FALSE
ENSG00000169246	NPIPB3	protein_coding	grey	FALSE
ENSG00000169302	STK32A	protein_coding	grey	FALSE
ENSG00000169359	SLC33A1	protein_coding	grey	FALSE
ENSG00000169490	TM2D2	protein_coding	grey	FALSE
ENSG00000169507	SLC38A11	protein_coding	grey	FALSE
ENSG00000169621	APLF	protein_coding	grey	FALSE
ENSG00000169981	ZNF35	protein_coding	grey	FALSE
ENSG00000170191	NANP	protein_coding	grey	FALSE
ENSG00000170260	ZNF212	protein_coding	grey	FALSE
ENSG00000170264	FAM161A	protein_coding	grey	FALSE
ENSG00000170426	SDR9C7	protein_coding	grey	FALSE
ENSG00000170439	METTL7B	protein_coding	grey	FALSE
ENSG00000170468	RIOX1	protein_coding	grey	FALSE
ENSG00000170485	NPAS2	protein_coding	grey	FALSE
ENSG00000170558	CDH2	protein_coding	grey	FALSE
ENSG00000170632	ARMC10	protein_coding	grey	FALSE
ENSG00000170837	GPR27	protein_coding	grey	FALSE
ENSG00000171084	FAM86JP	transcribed_unprocessed_pseudogene	grey	FALSE
ENSG00000171155	C1GALT1C1	protein_coding	grey	FALSE
ENSG00000171169	NAIF1	protein_coding	grey	FALSE
ENSG00000171224	FAM241B	protein_coding	grey	FALSE
ENSG00000171295	ZNF440	protein_coding	grey	FALSE
ENSG00000171492	LRRC8D	protein_coding	grey	FALSE
ENSG00000171634	BPTF	protein_coding	grey	FALSE
ENSG00000171772	SYCE1	protein_coding	grey	FALSE
ENSG00000171806	METTL18	protein_coding	grey	FALSE
ENSG00000171817	ZNF540	protein_coding	grey	FALSE
ENSG00000171827	ZNF570	protein_coding	grey	FALSE
ENSG00000171970	ZNF57	protein_coding	grey	FALSE
ENSG00000172000	ZNF556	protein_coding	grey	FALSE
ENSG00000172062	SMN1	protein_coding	grey	FALSE
ENSG00000172071	EIF2AK3	protein_coding	grey	FALSE
ENSG00000172167	MTBP	protein_coding	grey	FALSE
ENSG00000172243	CLEC7A	protein_coding	grey	FALSE
ENSG00000172262	ZNF131	protein_coding	grey	FALSE
ENSG00000172264	MACROD2	protein_coding	grey	FALSE
ENSG00000172269	DPAGT1	protein_coding	grey	FALSE
ENSG00000172425	TTC36	protein_coding	grey	FALSE
ENSG00000172530	BANP	protein_coding	grey	FALSE
ENSG00000172687	ZNF738	protein_coding	grey	FALSE
ENSG00000172728	FUT10	protein_coding	grey	FALSE
ENSG00000172785	CBWD1	protein_coding	grey	FALSE
ENSG00000172840	PDP2	protein_coding	grey	FALSE
ENSG00000172954	LCLAT1	protein_coding	grey	FALSE
ENSG00000173214	MFSD4B	protein_coding	grey	FALSE
ENSG00000173226	IQCB1	protein_coding	grey	FALSE
ENSG00000173227	SYT12	protein_coding	grey	FALSE
ENSG00000173295	FAM86B3P	transcribed_unprocessed_pseudogene	grey	FALSE
ENSG00000173338	KCNK7	protein_coding	grey	FALSE
ENSG00000173421	CCDC36	protein_coding	grey	FALSE
ENSG00000174125	TLR1	protein_coding	grey	FALSE
ENSG00000174137	FAM53A	protein_coding	grey	FALSE
ENSG00000174165	ZDHHC24	protein_coding	grey	FALSE
ENSG00000174326	SLC16A11	protein_coding	grey	FALSE
ENSG00000174564	IL20RB	protein_coding	grey	FALSE
ENSG00000174721	FGFBP3	protein_coding	grey	FALSE
ENSG00000174842	GLMN	protein_coding	grey	FALSE
ENSG00000174891	RSRC1	protein_coding	grey	FALSE
ENSG00000175054	ATR	protein_coding	grey	FALSE
ENSG00000175170	FAM182B	lncRNA	grey	FALSE
ENSG00000175482	POLD4	protein_coding	grey	FALSE
ENSG00000175611	LINC00476	lncRNA	grey	FALSE
ENSG00000175643	RMI2	protein_coding	grey	FALSE
ENSG00000175691	ZNF77	protein_coding	grey	FALSE
ENSG00000175768	TOMM5	protein_coding	grey	FALSE
ENSG00000175782	SLC35E3	protein_coding	grey	FALSE
ENSG00000175787	ZNF169	protein_coding	grey	FALSE
ENSG00000176024	ZNF613	protein_coding	grey	FALSE
ENSG00000176124	DLEU1	lncRNA	grey	FALSE
ENSG00000176204	LRRTM4	protein_coding	grey	FALSE
ENSG00000176208	ATAD5	protein_coding	grey	FALSE
ENSG00000176222	ZNF404	protein_coding	grey	FALSE
ENSG00000176225	RTTN	protein_coding	grey	FALSE
ENSG00000176390	CRLF3	protein_coding	grey	FALSE
ENSG00000176396	EID2	protein_coding	grey	FALSE
ENSG00000176401	EID2B	protein_coding	grey	FALSE
ENSG00000176595	KBTBD11	protein_coding	grey	FALSE
ENSG00000176681	LRRC37A	protein_coding	grey	FALSE
ENSG00000176723	ZNF843	protein_coding	grey	FALSE
ENSG00000176749	CDK5R1	protein_coding	grey	FALSE
ENSG00000177058	SLC38A9	protein_coding	grey	FALSE
ENSG00000177076	ACER2	protein_coding	grey	FALSE
ENSG00000177103	DSCAML1	protein_coding	grey	FALSE
ENSG00000177335	C8orf31	lncRNA	grey	FALSE
ENSG00000177359		transcribed_unprocessed_pseudogene	grey	FALSE
ENSG00000177432	NAP1L5	protein_coding	grey	FALSE
ENSG00000177483	RBM44	protein_coding	grey	FALSE
ENSG00000177576	C18orf32	protein_coding	grey	FALSE
ENSG00000177599	ZNF491	protein_coding	grey	FALSE
ENSG00000177738		lncRNA	grey	FALSE
ENSG00000177842	ZNF620	protein_coding	grey	FALSE
ENSG00000177854	TMEM187	protein_coding	grey	FALSE
ENSG00000177873	ZNF619	protein_coding	grey	FALSE
ENSG00000178075	GRAMD1C	protein_coding	grey	FALSE
ENSG00000178149	DALRD3	protein_coding	grey	FALSE
ENSG00000178201	VN1R1	protein_coding	grey	FALSE
ENSG00000178295	GEN1	protein_coding	grey	FALSE
ENSG00000178752	ERFE	protein_coding	grey	FALSE
ENSG00000178761	FAM219B	protein_coding	grey	FALSE
ENSG00000178917	ZNF852	protein_coding	grey	FALSE
ENSG00000178947	SMIM10L2A	protein_coding	grey	FALSE
ENSG00000179151	EDC3	protein_coding	grey	FALSE
ENSG00000179242	CDH4	protein_coding	grey	FALSE
ENSG00000179335	CLK3	protein_coding	grey	FALSE
ENSG00000179361	ARID3B	protein_coding	grey	FALSE
ENSG00000179388	EGR3	protein_coding	grey	FALSE
ENSG00000179397	CATSPERE	protein_coding	grey	FALSE
ENSG00000179593	ALOX15B	protein_coding	grey	FALSE
ENSG00000179611	DGKZP1	processed_pseudogene	grey	FALSE
ENSG00000179627	ZBTB42	protein_coding	grey	FALSE
ENSG00000179636	TPPP2	protein_coding	grey	FALSE
ENSG00000179859	RNF227	protein_coding	grey	FALSE
ENSG00000179899	PHC1P1	processed_pseudogene	grey	FALSE
ENSG00000180035	ZNF48	protein_coding	grey	FALSE
ENSG00000180113	TDRD6	protein_coding	grey	FALSE
ENSG00000180198	RCC1	protein_coding	grey	FALSE
ENSG00000180229	HERC2P3	transcribed_unprocessed_pseudogene	grey	FALSE
ENSG00000180257	ZNF816	protein_coding	grey	FALSE
ENSG00000180287	PLD5	protein_coding	grey	FALSE
ENSG00000180376	CCDC66	protein_coding	grey	FALSE
ENSG00000180385	EMC3-AS1	transcribed_unprocessed_pseudogene	grey	FALSE
ENSG00000180423	HARBI1	protein_coding	grey	FALSE
ENSG00000180479	ZNF571	protein_coding	grey	FALSE
ENSG00000180481	GLIPR1L2	protein_coding	grey	FALSE
ENSG00000180638	SLC47A2	protein_coding	grey	FALSE
ENSG00000180855	ZNF443	protein_coding	grey	FALSE
ENSG00000180867	PDIA3P1	transcribed_processed_pseudogene	grey	FALSE
ENSG00000180979	LRRC57	protein_coding	grey	FALSE
ENSG00000181026	AEN	protein_coding	grey	FALSE
ENSG00000181038	METTL23	protein_coding	grey	FALSE
ENSG00000181191	PJA1	protein_coding	grey	FALSE
ENSG00000181220	ZNF746	protein_coding	grey	FALSE
ENSG00000181409	AATK	protein_coding	grey	FALSE
ENSG00000181450	ZNF678	protein_coding	grey	FALSE
ENSG00000181690	PLAG1	protein_coding	grey	FALSE
ENSG00000181789	COPG1	protein_coding	grey	FALSE
ENSG00000182308	DCAF4L1	protein_coding	grey	FALSE
ENSG00000182318	ZSCAN22	protein_coding	grey	FALSE
ENSG00000182362	YBEY	protein_coding	grey	FALSE
ENSG00000182372	CLN8	protein_coding	grey	FALSE
ENSG00000182481	KPNA2	protein_coding	grey	FALSE
ENSG00000182544	MFSD5	protein_coding	grey	FALSE
ENSG00000182628	SKA2	protein_coding	grey	FALSE
ENSG00000182752	PAPPA	protein_coding	grey	FALSE
ENSG00000183044	ABAT	protein_coding	grey	FALSE
ENSG00000183066	WBP2NL	protein_coding	grey	FALSE
ENSG00000183137	CEP57L1	protein_coding	grey	FALSE
ENSG00000183155	RABIF	protein_coding	grey	FALSE
ENSG00000183250	LINC01547	lncRNA	grey	FALSE
ENSG00000183281	PLGLB1	protein_coding	grey	FALSE
ENSG00000183283	DAZAP2	protein_coding	grey	FALSE
ENSG00000183474	GTF2H2C	protein_coding	grey	FALSE
ENSG00000183527	PSMG1	protein_coding	grey	FALSE
ENSG00000183569	SERHL2	protein_coding	grey	FALSE
ENSG00000183579	ZNRF3	protein_coding	grey	FALSE
ENSG00000183604	SMG1P5	transcribed_unprocessed_pseudogene	grey	FALSE
ENSG00000183666	GUSBP1	transcribed_unprocessed_pseudogene	grey	FALSE
ENSG00000183763	TRAIP	protein_coding	grey	FALSE
ENSG00000183798	EMILIN3	protein_coding	grey	FALSE
ENSG00000184178	SCFD2	protein_coding	grey	FALSE
ENSG00000184208	C22orf46	unitary_pseudogene	grey	FALSE
ENSG00000184277	TM2D3	protein_coding	grey	FALSE
ENSG00000184363	PKP3	protein_coding	grey	FALSE
ENSG00000184445	KNTC1	protein_coding	grey	FALSE
ENSG00000184619	KRBA2	protein_coding	grey	FALSE
ENSG00000184635	ZNF93	protein_coding	grey	FALSE
ENSG00000184786	TCTE3	protein_coding	grey	FALSE
ENSG00000184923	NUTM2A	protein_coding	grey	FALSE
ENSG00000184988	TMEM106A	protein_coding	grey	FALSE
ENSG00000184992	BRI3BP	protein_coding	grey	FALSE
ENSG00000185015	CA13	protein_coding	grey	FALSE
ENSG00000185158	LRRC37B	protein_coding	grey	FALSE
ENSG00000185250	PPIL6	protein_coding	grey	FALSE
ENSG00000185442	FAM174B	protein_coding	grey	FALSE
ENSG00000185652	NTF3	protein_coding	grey	FALSE
ENSG00000185670	ZBTB3	protein_coding	grey	FALSE
ENSG00000185697	MYBL1	protein_coding	grey	FALSE
ENSG00000185730	ZNF696	protein_coding	grey	FALSE
ENSG00000185798	WDR53	protein_coding	grey	FALSE
ENSG00000185829	ARL17A	protein_coding	grey	FALSE
ENSG00000185920	PTCH1	protein_coding	grey	FALSE
ENSG00000186001	LRCH3	protein_coding	grey	FALSE
ENSG00000186017	ZNF566	protein_coding	grey	FALSE
ENSG00000186104	CYP2R1	protein_coding	grey	FALSE
ENSG00000186132	C2orf76	protein_coding	grey	FALSE
ENSG00000186141	POLR3C	protein_coding	grey	FALSE
ENSG00000186230	ZNF749	protein_coding	grey	FALSE
ENSG00000186272	ZNF17	protein_coding	grey	FALSE
ENSG00000186280	KDM4D	protein_coding	grey	FALSE
ENSG00000186283	TOR3A	protein_coding	grey	FALSE
ENSG00000186318	BACE1	protein_coding	grey	FALSE
ENSG00000186364	NUDT17	protein_coding	grey	FALSE
ENSG00000186615	KTN1-AS1	lncRNA	grey	FALSE
ENSG00000186638	KIF24	protein_coding	grey	FALSE
ENSG00000186666	BCDIN3D	protein_coding	grey	FALSE
ENSG00000186787	SPIN2B	protein_coding	grey	FALSE
ENSG00000186889	TMEM17	protein_coding	grey	FALSE
ENSG00000186976	EFCAB6	protein_coding	grey	FALSE
ENSG00000187049	TMEM216	protein_coding	grey	FALSE
ENSG00000187122	SLIT1	protein_coding	grey	FALSE
ENSG00000187140	FOXD3	protein_coding	grey	FALSE
ENSG00000187626	ZKSCAN4	protein_coding	grey	FALSE
ENSG00000187790	FANCM	protein_coding	grey	FALSE
ENSG00000187824	TMEM220	protein_coding	grey	FALSE
ENSG00000187951		lncRNA	grey	FALSE
ENSG00000188033	ZNF490	protein_coding	grey	FALSE
ENSG00000188092	GPR89B	protein_coding	grey	FALSE
ENSG00000188266	HYKK	protein_coding	grey	FALSE
ENSG00000188283	ZNF383	protein_coding	grey	FALSE
ENSG00000188428	BLOC1S5	protein_coding	grey	FALSE
ENSG00000188611	ASAH2	protein_coding	grey	FALSE
ENSG00000188681	TEKT4P2	transcribed_unprocessed_pseudogene	grey	FALSE
ENSG00000188706	ZDHHC9	protein_coding	grey	FALSE
ENSG00000188707	ZBED6CL	protein_coding	grey	FALSE
ENSG00000188732	FAM221A	protein_coding	grey	FALSE
ENSG00000188785	ZNF548	protein_coding	grey	FALSE
ENSG00000188803	SHISA6	protein_coding	grey	FALSE
ENSG00000188811	NHLRC3	protein_coding	grey	FALSE
ENSG00000188825	LINC00910	lncRNA	grey	FALSE
ENSG00000188856	RPSAP47	processed_pseudogene	grey	FALSE
ENSG00000188868	ZNF563	protein_coding	grey	FALSE
ENSG00000188933	USP32P1	transcribed_unprocessed_pseudogene	grey	FALSE
ENSG00000189042	ZNF567	protein_coding	grey	FALSE
ENSG00000189058	APOD	protein_coding	grey	FALSE
ENSG00000189164	ZNF527	protein_coding	grey	FALSE
ENSG00000189195	BTBD8	protein_coding	grey	FALSE
ENSG00000189362	NEMP2	protein_coding	grey	FALSE
ENSG00000189420	ZFP92	protein_coding	grey	FALSE
ENSG00000189431	RASSF10	protein_coding	grey	FALSE
ENSG00000196116	TDRD7	protein_coding	grey	FALSE
ENSG00000196150	ZNF250	protein_coding	grey	FALSE
ENSG00000196151	WDSUB1	protein_coding	grey	FALSE
ENSG00000196204	RNF216P1	transcribed_unprocessed_pseudogene	grey	FALSE
ENSG00000196345	ZKSCAN7	protein_coding	grey	FALSE
ENSG00000196357	ZNF565	protein_coding	grey	FALSE
ENSG00000196466	ZNF799	protein_coding	grey	FALSE
ENSG00000196505	GDAP2	protein_coding	grey	FALSE
ENSG00000196605	ZNF846	protein_coding	grey	FALSE
ENSG00000196646	ZNF136	protein_coding	grey	FALSE
ENSG00000196724	ZNF418	protein_coding	grey	FALSE
ENSG00000196735	HLA-DQA1	protein_coding	grey	FALSE
ENSG00000196741	LINC01560	lncRNA	grey	FALSE
ENSG00000196812	ZSCAN16	protein_coding	grey	FALSE
ENSG00000196873	CBWD3	protein_coding	grey	FALSE
ENSG00000196972	SMIM10L2B	protein_coding	grey	FALSE
ENSG00000196981	WDR5B	protein_coding	grey	FALSE
ENSG00000197013	ZNF429	protein_coding	grey	FALSE
ENSG00000197016	ZNF470	protein_coding	grey	FALSE
ENSG00000197021	CXorf40B	protein_coding	grey	FALSE
ENSG00000197062	ZSCAN26	protein_coding	grey	FALSE
ENSG00000197124	ZNF682	protein_coding	grey	FALSE
ENSG00000197157	SND1	protein_coding	grey	FALSE
ENSG00000197302	ZNF720	protein_coding	grey	FALSE
ENSG00000197323	TRIM33	protein_coding	grey	FALSE
ENSG00000197362	ZNF786	protein_coding	grey	FALSE
ENSG00000197363	ZNF517	protein_coding	grey	FALSE
ENSG00000197451	HNRNPAB	protein_coding	grey	FALSE
ENSG00000197479	PCDHB11	protein_coding	grey	FALSE
ENSG00000197548	ATG7	protein_coding	grey	FALSE
ENSG00000197603	CPLANE1	protein_coding	grey	FALSE
ENSG00000197808	ZNF461	protein_coding	grey	FALSE
ENSG00000197816	CCDC180	protein_coding	grey	FALSE
ENSG00000197930	ERO1A	protein_coding	grey	FALSE
ENSG00000197937	ZNF347	protein_coding	grey	FALSE
ENSG00000197951	ZNF71	protein_coding	grey	FALSE
ENSG00000198000	NOL8	protein_coding	grey	FALSE
ENSG00000198018	ENTPD7	protein_coding	grey	FALSE
ENSG00000198056	PRIM1	protein_coding	grey	FALSE
ENSG00000198064	NPIPB13	protein_coding	grey	FALSE
ENSG00000198093	ZNF649	protein_coding	grey	FALSE
ENSG00000198108	CHSY3	protein_coding	grey	FALSE
ENSG00000198133	TMEM229B	protein_coding	grey	FALSE
ENSG00000198162	MAN1A2	protein_coding	grey	FALSE
ENSG00000198270	TMEM116	protein_coding	grey	FALSE
ENSG00000198298	ZNF485	protein_coding	grey	FALSE
ENSG00000198301	SDAD1	protein_coding	grey	FALSE
ENSG00000198331	HYLS1	protein_coding	grey	FALSE
ENSG00000198353	HOXC4	protein_coding	grey	FALSE
ENSG00000198400	NTRK1	protein_coding	grey	FALSE
ENSG00000198420	TCAF1	protein_coding	grey	FALSE
ENSG00000198429	ZNF69	protein_coding	grey	FALSE
ENSG00000198440	ZNF583	protein_coding	grey	FALSE
ENSG00000198453	ZNF568	protein_coding	grey	FALSE
ENSG00000198468	FLVCR1-DT	lncRNA	grey	FALSE
ENSG00000198496	NBR2	lncRNA	grey	FALSE
ENSG00000198498	TMA16	protein_coding	grey	FALSE
ENSG00000198538	ZNF28	protein_coding	grey	FALSE
ENSG00000198554	WDHD1	protein_coding	grey	FALSE
ENSG00000198625	MDM4	protein_coding	grey	FALSE
ENSG00000198663	C6orf89	protein_coding	grey	FALSE
ENSG00000198783	ZNF830	protein_coding	grey	FALSE
ENSG00000198825	INPP5F	protein_coding	grey	FALSE
ENSG00000198839	ZNF277	protein_coding	grey	FALSE
ENSG00000198855	FICD	protein_coding	grey	FALSE
ENSG00000198870	STKLD1	protein_coding	grey	FALSE
ENSG00000198909	MAP3K3	protein_coding	grey	FALSE
ENSG00000198912	C1orf174	protein_coding	grey	FALSE
ENSG00000198939	ZFP2	protein_coding	grey	FALSE
ENSG00000198945	L3MBTL3	protein_coding	grey	FALSE
ENSG00000199017	MIR1-1	miRNA	grey	FALSE
ENSG00000202538	RNU4-2	snRNA	grey	FALSE
ENSG00000203288	TDRKH-AS1	lncRNA	grey	FALSE
ENSG00000203791	EEF1AKMT2	protein_coding	grey	FALSE
ENSG00000203799	CCDC162P	transcribed_unitary_pseudogene	grey	FALSE
ENSG00000203993	ARRDC1-AS1	lncRNA	grey	FALSE
ENSG00000203999	LINC01270	lncRNA	grey	FALSE
ENSG00000204147	ASAH2B	protein_coding	grey	FALSE
ENSG00000204177	BMS1P1	transcribed_unprocessed_pseudogene	grey	FALSE
ENSG00000204427	ABHD16A	protein_coding	grey	FALSE
ENSG00000204428	LY6G5C	protein_coding	grey	FALSE
ENSG00000204444	APOM	protein_coding	grey	FALSE
ENSG00000204519	ZNF551	protein_coding	grey	FALSE
ENSG00000204569	PPP1R10	protein_coding	grey	FALSE
ENSG00000204599	TRIM39	protein_coding	grey	FALSE
ENSG00000204604	ZNF468	protein_coding	grey	FALSE
ENSG00000204611	ZNF616	protein_coding	grey	FALSE
ENSG00000204650	LINC02210	transcribed_unitary_pseudogene	grey	FALSE
ENSG00000204745		unprocessed_pseudogene	grey	FALSE
ENSG00000204856	FAM216A	protein_coding	grey	FALSE
ENSG00000204920	ZNF155	protein_coding	grey	FALSE
ENSG00000204934	ATP6V0E2-AS1	lncRNA	grey	FALSE
ENSG00000204956	PCDHGA1	protein_coding	grey	FALSE
ENSG00000205060	SLC35B4	protein_coding	grey	FALSE
ENSG00000205208	C4orf46	protein_coding	grey	FALSE
ENSG00000205215	KRT17P7	transcribed_unprocessed_pseudogene	grey	FALSE
ENSG00000205302	SNX2	protein_coding	grey	FALSE
ENSG00000205312	KRT17P4	transcribed_unprocessed_pseudogene	grey	FALSE
ENSG00000205485		transcribed_unprocessed_pseudogene	grey	FALSE
ENSG00000205534	SMG1P2	unprocessed_pseudogene	grey	FALSE
ENSG00000205559	CHKB-DT	lncRNA	grey	FALSE
ENSG00000205609	EIF3CL	protein_coding	grey	FALSE
ENSG00000205758	CRYZL1	protein_coding	grey	FALSE
ENSG00000205771	CATSPER2P1	transcribed_unprocessed_pseudogene	grey	FALSE
ENSG00000205808	PLPP6	protein_coding	grey	FALSE
ENSG00000206530	CFAP44	protein_coding	grey	FALSE
ENSG00000206535	LNP1	protein_coding	grey	FALSE
ENSG00000206562	METTL6	protein_coding	grey	FALSE
ENSG00000206573	THUMPD3-AS1	lncRNA	grey	FALSE
ENSG00000207561	MIR635	miRNA	grey	FALSE
ENSG00000207650	MIR570	miRNA	grey	FALSE
ENSG00000210100	MT-TI	Mt_tRNA	grey	FALSE
ENSG00000210117	MT-TW	Mt_tRNA	grey	FALSE
ENSG00000211896	IGHG1	IG_C_gene	grey	FALSE
ENSG00000212127	TAS2R14	protein_coding	grey	FALSE
ENSG00000213025	COX20P1	processed_pseudogene	grey	FALSE
ENSG00000213066	FGFR1OP	protein_coding	grey	FALSE
ENSG00000213073		transcribed_processed_pseudogene	grey	FALSE
ENSG00000213533	STIMATE	protein_coding	grey	FALSE
ENSG00000213588	ZBTB9	protein_coding	grey	FALSE
ENSG00000213888	LINC01521	lncRNA	grey	FALSE
ENSG00000213963		lncRNA	grey	FALSE
ENSG00000214050	FBXO16	protein_coding	grey	FALSE
ENSG00000214290	COLCA2	protein_coding	grey	FALSE
ENSG00000214413	BBIP1	protein_coding	grey	FALSE
ENSG00000214439	FAM185BP	transcribed_unprocessed_pseudogene	grey	FALSE
ENSG00000214595	EML6	protein_coding	grey	FALSE
ENSG00000214783	POLR2J4	lncRNA	grey	FALSE
ENSG00000214870		lncRNA	grey	FALSE
ENSG00000214900	LINC01588	lncRNA	grey	FALSE
ENSG00000214942		lncRNA	grey	FALSE
ENSG00000215022		lncRNA	grey	FALSE
ENSG00000215126	CBWD6	protein_coding	grey	FALSE
ENSG00000215190	LINC00680	transcribed_unprocessed_pseudogene	grey	FALSE
ENSG00000215193	PEX26	protein_coding	grey	FALSE
ENSG00000215244	LINC02649	lncRNA	grey	FALSE
ENSG00000215302		transcribed_unprocessed_pseudogene	grey	FALSE
ENSG00000215374	FAM66B	lncRNA	grey	FALSE
ENSG00000215386	MIR99AHG	lncRNA	grey	FALSE
ENSG00000216866	RPS2P55	processed_pseudogene	grey	FALSE
ENSG00000216895		lncRNA	grey	FALSE
ENSG00000216901	ZNF603P	unprocessed_pseudogene	grey	FALSE
ENSG00000216937	CCDC7	protein_coding	grey	FALSE
ENSG00000217334		processed_pseudogene	grey	FALSE
ENSG00000218510	LINC00339	lncRNA	grey	FALSE
ENSG00000219186	FTH1P19	unprocessed_pseudogene	grey	FALSE
ENSG00000219665	ZNF433-AS1	lncRNA	grey	FALSE
ENSG00000220323	HIST2H2BD	transcribed_unprocessed_pseudogene	grey	FALSE
ENSG00000220563	PKMP3	processed_pseudogene	grey	FALSE
ENSG00000220848	RPS18P9	transcribed_processed_pseudogene	grey	FALSE
ENSG00000221866	PLXNA4	protein_coding	grey	FALSE
ENSG00000221886	ZBED8	protein_coding	grey	FALSE
ENSG00000221916	C19orf73	protein_coding	grey	FALSE
ENSG00000221923	ZNF880	protein_coding	grey	FALSE
ENSG00000221944	TIGD1	protein_coding	grey	FALSE
ENSG00000221988	PPT2	protein_coding	grey	FALSE
ENSG00000221990	EXOC3-AS1	lncRNA	grey	FALSE
ENSG00000221994	ZNF630	protein_coding	grey	FALSE
ENSG00000222880	RN7SKP261	misc_RNA	grey	FALSE
ENSG00000223482	NUTM2A-AS1	lncRNA	grey	FALSE
ENSG00000223508	RPL23AP53	transcribed_processed_pseudogene	grey	FALSE
ENSG00000223704	LINC01422	lncRNA	grey	FALSE
ENSG00000224097		transcribed_processed_pseudogene	grey	FALSE
ENSG00000224114		processed_pseudogene	grey	FALSE
ENSG00000224328	MDC1-AS1	lncRNA	grey	FALSE
ENSG00000224505		lncRNA	grey	FALSE
ENSG00000224565	LINC01754	lncRNA	grey	FALSE
ENSG00000224578	HNRNPA1P48	protein_coding	grey	FALSE
ENSG00000224812	TMEM72-AS1	lncRNA	grey	FALSE
ENSG00000224958	PGM5-AS1	lncRNA	grey	FALSE
ENSG00000225125	RANP4	processed_pseudogene	grey	FALSE
ENSG00000225151	GOLGA2P7	transcribed_unprocessed_pseudogene	grey	FALSE
ENSG00000225177		lncRNA	grey	FALSE
ENSG00000225342		lncRNA	grey	FALSE
ENSG00000225447	RPS15AP10	processed_pseudogene	grey	FALSE
ENSG00000225472		lncRNA	grey	FALSE
ENSG00000225484	NUTM2B-AS1	lncRNA	grey	FALSE
ENSG00000225518	LINC01703	lncRNA	grey	FALSE
ENSG00000225721		lncRNA	grey	FALSE
ENSG00000225778	PROSER2-AS1	lncRNA	grey	FALSE
ENSG00000225880	LINC00115	lncRNA	grey	FALSE
ENSG00000226149		lncRNA	grey	FALSE
ENSG00000226200	SGMS1-AS1	lncRNA	grey	FALSE
ENSG00000226259	GTF2H2B	transcribed_unprocessed_pseudogene	grey	FALSE
ENSG00000226266		lncRNA	grey	FALSE
ENSG00000226445		lncRNA	grey	FALSE
ENSG00000226686	LINC01535	lncRNA	grey	FALSE
ENSG00000226823	SUGT1P1	unprocessed_pseudogene	grey	FALSE
ENSG00000226824		lncRNA	grey	FALSE
ENSG00000227124	ZNF717	protein_coding	grey	FALSE
ENSG00000227252		lncRNA	grey	FALSE
ENSG00000227354	RBM26-AS1	lncRNA	grey	FALSE
ENSG00000227540		lncRNA	grey	FALSE
ENSG00000227799		processed_pseudogene	grey	FALSE
ENSG00000227811	INKA2-AS1	lncRNA	grey	FALSE
ENSG00000227963	RBM15-AS1	lncRNA	grey	FALSE
ENSG00000228049	POLR2J2	protein_coding	grey	FALSE
ENSG00000228063	LYPLAL1-DT	lncRNA	grey	FALSE
ENSG00000228065	LINC01515	lncRNA	grey	FALSE
ENSG00000228175	GEMIN8P4	processed_pseudogene	grey	FALSE
ENSG00000228274		lncRNA	grey	FALSE
ENSG00000228288	PCAT6	lncRNA	grey	FALSE
ENSG00000228434		lncRNA	grey	FALSE
ENSG00000228436		lncRNA	grey	FALSE
ENSG00000228451	SDAD1P1	transcribed_processed_pseudogene	grey	FALSE
ENSG00000228463		transcribed_processed_pseudogene	grey	FALSE
ENSG00000228696	ARL17B	protein_coding	grey	FALSE
ENSG00000228701	TNKS2-AS1	lncRNA	grey	FALSE
ENSG00000228812	LAMA5-AS1	lncRNA	grey	FALSE
ENSG00000229017	LINC01277	lncRNA	grey	FALSE
ENSG00000229043		lncRNA	grey	FALSE
ENSG00000229321		lncRNA	grey	FALSE
ENSG00000229828	PDE4DIPP1	unprocessed_pseudogene	grey	FALSE
ENSG00000229852		lncRNA	grey	FALSE
ENSG00000229921	KIF25-AS1	lncRNA	grey	FALSE
ENSG00000230084		lncRNA	grey	FALSE
ENSG00000230330	HMGN2P3	processed_pseudogene	grey	FALSE
ENSG00000230373	GOLGA6L5P	transcribed_unprocessed_pseudogene	grey	FALSE
ENSG00000230415	LINC01786	lncRNA	grey	FALSE
ENSG00000230537		lncRNA	grey	FALSE
ENSG00000230606		lncRNA	grey	FALSE
ENSG00000230797	YY2	protein_coding	grey	FALSE
ENSG00000231086	TSSK1A	unitary_pseudogene	grey	FALSE
ENSG00000231156		lncRNA	grey	FALSE
ENSG00000231167	YBX1P2	processed_pseudogene	grey	FALSE
ENSG00000231170		lncRNA	grey	FALSE
ENSG00000231365	WARS2-AS1	lncRNA	grey	FALSE
ENSG00000231584	FAHD2CP	transcribed_unprocessed_pseudogene	grey	FALSE
ENSG00000231711	LINC00899	lncRNA	grey	FALSE
ENSG00000231742	LINC01273	lncRNA	grey	FALSE
ENSG00000231770	TMEM44-AS1	lncRNA	grey	FALSE
ENSG00000231887	PRH1	protein_coding	grey	FALSE
ENSG00000231889	TRAF3IP2-AS1	lncRNA	grey	FALSE
ENSG00000232098		lncRNA	grey	FALSE
ENSG00000232104	RFX3-AS1	lncRNA	grey	FALSE
ENSG00000232445		lncRNA	grey	FALSE
ENSG00000232453	LINC02777	lncRNA	grey	FALSE
ENSG00000232480	TGFB2-AS1	lncRNA	grey	FALSE
ENSG00000232533		lncRNA	grey	FALSE
ENSG00000232586	KIAA1614-AS1	lncRNA	grey	FALSE
ENSG00000232677	LINC00665	lncRNA	grey	FALSE
ENSG00000232977	LINC00327	lncRNA	grey	FALSE
ENSG00000233382	NKAPP1	transcribed_processed_pseudogene	grey	FALSE
ENSG00000233396	LINC01719	lncRNA	grey	FALSE
ENSG00000233461		lncRNA	grey	FALSE
ENSG00000233469	ST6GALNAC4P1	processed_pseudogene	grey	FALSE
ENSG00000233597		processed_pseudogene	grey	FALSE
ENSG00000233654		lncRNA	grey	FALSE
ENSG00000233695	GAS6-AS1	lncRNA	grey	FALSE
ENSG00000233913	RPL10P9	processed_pseudogene	grey	FALSE
ENSG00000233937		lncRNA	grey	FALSE
ENSG00000234171	RNASEH1-AS1	lncRNA	grey	FALSE
ENSG00000234585	CCT6P3	transcribed_unprocessed_pseudogene	grey	FALSE
ENSG00000234589		processed_pseudogene	grey	FALSE
ENSG00000234664	HMGN2P5	processed_pseudogene	grey	FALSE
ENSG00000234665	LERFS	lncRNA	grey	FALSE
ENSG00000234684	SDCBP2-AS1	lncRNA	grey	FALSE
ENSG00000234719	NPIPB2	protein_coding	grey	FALSE
ENSG00000234807	LINC01135	lncRNA	grey	FALSE
ENSG00000234912	SNHG20	lncRNA	grey	FALSE
ENSG00000235034	C19orf81	protein_coding	grey	FALSE
ENSG00000235092	ID2-AS1	lncRNA	grey	FALSE
ENSG00000235162	C12orf75	protein_coding	grey	FALSE
ENSG00000235381		lncRNA	grey	FALSE
ENSG00000235609		lncRNA	grey	FALSE
ENSG00000235652		lncRNA	grey	FALSE
ENSG00000235655	H3F3AP4	processed_pseudogene	grey	FALSE
ENSG00000235888		lncRNA	grey	FALSE
ENSG00000235919	ASH1L-AS1	lncRNA	grey	FALSE
ENSG00000235954	TTC28-AS1	lncRNA	grey	FALSE
ENSG00000236255		lncRNA	grey	FALSE
ENSG00000236423	LINC01134	lncRNA	grey	FALSE
ENSG00000236753	MKLN1-AS	lncRNA	grey	FALSE
ENSG00000236778	INTS6-AS1	lncRNA	grey	FALSE
ENSG00000237004	ZNRF2P1	transcribed_processed_pseudogene	grey	FALSE
ENSG00000237181		lncRNA	grey	FALSE
ENSG00000237296	SMG1P1	transcribed_unprocessed_pseudogene	grey	FALSE
ENSG00000237429		lncRNA	grey	FALSE
ENSG00000237440	ZNF737	protein_coding	grey	FALSE
ENSG00000237491	LINC01409	lncRNA	grey	FALSE
ENSG00000237541	HLA-DQA2	protein_coding	grey	FALSE
ENSG00000237742		lncRNA	grey	FALSE
ENSG00000237950		lncRNA	grey	FALSE
ENSG00000237975	FLG-AS1	lncRNA	grey	FALSE
ENSG00000238058		lncRNA	grey	FALSE
ENSG00000238105	GOLGA2P5	transcribed_unprocessed_pseudogene	grey	FALSE
ENSG00000238197	PAXBP1-AS1	lncRNA	grey	FALSE
ENSG00000239332	LINC01119	lncRNA	grey	FALSE
ENSG00000239445	ST3GAL6-AS1	lncRNA	grey	FALSE
ENSG00000239672	NME1	protein_coding	grey	FALSE
ENSG00000240057		lncRNA	grey	FALSE
ENSG00000240219		lncRNA	grey	FALSE
ENSG00000240225	ZNF542P	transcribed_unprocessed_pseudogene	grey	FALSE
ENSG00000240288	GHRLOS	lncRNA	grey	FALSE
ENSG00000240303	ACAD11	protein_coding	grey	FALSE
ENSG00000240875	LINC00886	lncRNA	grey	FALSE
ENSG00000241058	NSUN6	protein_coding	grey	FALSE
ENSG00000241127	YAE1	protein_coding	grey	FALSE
ENSG00000241170		transcribed_processed_pseudogene	grey	FALSE
ENSG00000241506	PSMC1P1	processed_pseudogene	grey	FALSE
ENSG00000241684	ADAMTS9-AS2	lncRNA	grey	FALSE
ENSG00000241764		lncRNA	grey	FALSE
ENSG00000241935	HOGA1	protein_coding	grey	FALSE
ENSG00000241945	PWP2	protein_coding	grey	FALSE
ENSG00000242028	HYPK	protein_coding	grey	FALSE
ENSG00000242110	AMACR	protein_coding	grey	FALSE
ENSG00000242125	SNHG3	lncRNA	grey	FALSE
ENSG00000242173	ARHGDIG	protein_coding	grey	FALSE
ENSG00000242474		lncRNA	grey	FALSE
ENSG00000243566	UPK3B	protein_coding	grey	FALSE
ENSG00000243660	ZNF487	protein_coding	grey	FALSE
ENSG00000243725	TTC4	protein_coding	grey	FALSE
ENSG00000244038	DDOST	protein_coding	grey	FALSE
ENSG00000244045	TMEM199	protein_coding	grey	FALSE
ENSG00000244119	PDCL3P4	processed_pseudogene	grey	FALSE
ENSG00000244625	MIATNB	lncRNA	grey	FALSE
ENSG00000244671	RN7SL280P	misc_RNA	grey	FALSE
ENSG00000244701		lncRNA	grey	FALSE
ENSG00000244998		lncRNA	grey	FALSE
ENSG00000245105	A2M-AS1	lncRNA	grey	FALSE
ENSG00000245146	MALINC1	lncRNA	grey	FALSE
ENSG00000245149	RNF139-AS1	lncRNA	grey	FALSE
ENSG00000245498		lncRNA	grey	FALSE
ENSG00000245552		lncRNA	grey	FALSE
ENSG00000245975		lncRNA	grey	FALSE
ENSG00000246089		lncRNA	grey	FALSE
ENSG00000246174	KCTD21-AS1	lncRNA	grey	FALSE
ENSG00000246263	UBR5-AS1	lncRNA	grey	FALSE
ENSG00000246273	SBF2-AS1	lncRNA	grey	FALSE
ENSG00000246430	LINC00968	lncRNA	grey	FALSE
ENSG00000246523	FZD4-DT	lncRNA	grey	FALSE
ENSG00000246763	RGMB-AS1	lncRNA	grey	FALSE
ENSG00000247092	SNHG10	lncRNA	grey	FALSE
ENSG00000247095	MIR210HG	lncRNA	grey	FALSE
ENSG00000247121		lncRNA	grey	FALSE
ENSG00000247157	LINC01252	lncRNA	grey	FALSE
ENSG00000247199		lncRNA	grey	FALSE
ENSG00000247240	UBL7-AS1	lncRNA	grey	FALSE
ENSG00000247400	DNAJC3-DT	lncRNA	grey	FALSE
ENSG00000247679		lncRNA	grey	FALSE
ENSG00000247708	STX18-AS1	lncRNA	grey	FALSE
ENSG00000247796		lncRNA	grey	FALSE
ENSG00000247934		lncRNA	grey	FALSE
ENSG00000248445	SEMA6A-AS1	lncRNA	grey	FALSE
ENSG00000248489	LINC02062	lncRNA	grey	FALSE
ENSG00000248538		lncRNA	grey	FALSE
ENSG00000248671		lncRNA	grey	FALSE
ENSG00000248863		transcribed_processed_pseudogene	grey	FALSE
ENSG00000248866	USP46-AS1	lncRNA	grey	FALSE
ENSG00000248905	FMN1	protein_coding	grey	FALSE
ENSG00000249085		lncRNA	grey	FALSE
ENSG00000249348	UGDH-AS1	lncRNA	grey	FALSE
ENSG00000249353	NPM1P27	processed_pseudogene	grey	FALSE
ENSG00000249471	ZNF324B	protein_coding	grey	FALSE
ENSG00000249602		lncRNA	grey	FALSE
ENSG00000249637		lncRNA	grey	FALSE
ENSG00000249936	RAC1P2	processed_pseudogene	grey	FALSE
ENSG00000250091	DNAH10OS	lncRNA	grey	FALSE
ENSG00000250130		processed_pseudogene	grey	FALSE
ENSG00000250565	ATP6V1E2	protein_coding	grey	FALSE
ENSG00000250608		lncRNA	grey	FALSE
ENSG00000250616		lncRNA	grey	FALSE
ENSG00000250673	REELD1	protein_coding	grey	FALSE
ENSG00000250959	GLUD1P3	transcribed_unprocessed_pseudogene	grey	FALSE
ENSG00000251034		lncRNA	grey	FALSE
ENSG00000251131		lncRNA	grey	FALSE
ENSG00000251141	MRPS30-DT	lncRNA	grey	FALSE
ENSG00000251192	ZNF674	protein_coding	grey	FALSE
ENSG00000251364		lncRNA	grey	FALSE
ENSG00000251396	LINC01301	lncRNA	grey	FALSE
ENSG00000251448		lncRNA	grey	FALSE
ENSG00000251867		lncRNA	grey	FALSE
ENSG00000253227		lncRNA	grey	FALSE
ENSG00000253251	SHLD3	protein_coding	grey	FALSE
ENSG00000253372		lncRNA	grey	FALSE
ENSG00000253552	HOXA-AS2	lncRNA	grey	FALSE
ENSG00000253636		lncRNA	grey	FALSE
ENSG00000253704		lncRNA	grey	FALSE
ENSG00000253819	LINC01151	lncRNA	grey	FALSE
ENSG00000254469		protein_coding	grey	FALSE
ENSG00000254536		protein_coding	grey	FALSE
ENSG00000254577		lncRNA	grey	FALSE
ENSG00000254685	FPGT	protein_coding	grey	FALSE
ENSG00000254783		processed_pseudogene	grey	FALSE
ENSG00000255052	FAM66D	lncRNA	grey	FALSE
ENSG00000255145	STX17-AS1	lncRNA	grey	FALSE
ENSG00000255158		lncRNA	grey	FALSE
ENSG00000255200	PGAM1P8	transcribed_processed_pseudogene	grey	FALSE
ENSG00000255435		lncRNA	grey	FALSE
ENSG00000255458		lncRNA	grey	FALSE
ENSG00000255717	SNHG1	lncRNA	grey	FALSE
ENSG00000255772	LINC01479	lncRNA	grey	FALSE
ENSG00000256294	ZNF225	protein_coding	grey	FALSE
ENSG00000256433		lncRNA	grey	FALSE
ENSG00000256448		lncRNA	grey	FALSE
ENSG00000256591		protein_coding	grey	FALSE
ENSG00000256628	ZBTB11-AS1	lncRNA	grey	FALSE
ENSG00000256667	KLRA1P	transcribed_unprocessed_pseudogene	grey	FALSE
ENSG00000257135	ODC1-DT	lncRNA	grey	FALSE
ENSG00000257176		lncRNA	grey	FALSE
ENSG00000257298		lncRNA	grey	FALSE
ENSG00000257497		lncRNA	grey	FALSE
ENSG00000257501		transcribed_processed_pseudogene	grey	FALSE
ENSG00000257511		processed_pseudogene	grey	FALSE
ENSG00000257800	FNBP1P1	processed_pseudogene	grey	FALSE
ENSG00000258311		protein_coding	grey	FALSE
ENSG00000258422		lncRNA	grey	FALSE
ENSG00000258484	SPESP1	protein_coding	grey	FALSE
ENSG00000258559		lncRNA	grey	FALSE
ENSG00000258604		lncRNA	grey	FALSE
ENSG00000258647	LINC00930	lncRNA	grey	FALSE
ENSG00000258667	HIF1A-AS3	lncRNA	grey	FALSE
ENSG00000258708	SLC25A21-AS1	lncRNA	grey	FALSE
ENSG00000258738		lncRNA	grey	FALSE
ENSG00000258789		lncRNA	grey	FALSE
ENSG00000258824		lncRNA	grey	FALSE
ENSG00000259030	FPGT-TNNI3K	protein_coding	grey	FALSE
ENSG00000259417	CTXND1	protein_coding	grey	FALSE
ENSG00000259456	ADNP-AS1	lncRNA	grey	FALSE
ENSG00000259642	ST20-AS1	lncRNA	grey	FALSE
ENSG00000259768		lncRNA	grey	FALSE
ENSG00000259781	HMGB1P6	processed_pseudogene	grey	FALSE
ENSG00000259826		lncRNA	grey	FALSE
ENSG00000259828		lncRNA	grey	FALSE
ENSG00000259877		lncRNA	grey	FALSE
ENSG00000259959		lncRNA	grey	FALSE
ENSG00000259961		lncRNA	grey	FALSE
ENSG00000260000		lncRNA	grey	FALSE
ENSG00000260236		lncRNA	grey	FALSE
ENSG00000260276		lncRNA	grey	FALSE
ENSG00000260296		lncRNA	grey	FALSE
ENSG00000260337		lncRNA	grey	FALSE
ENSG00000260372	AQP4-AS1	lncRNA	grey	FALSE
ENSG00000260400		lncRNA	grey	FALSE
ENSG00000260572		lncRNA	grey	FALSE
ENSG00000260711		lncRNA	grey	FALSE
ENSG00000260751		lncRNA	grey	FALSE
ENSG00000260778		lncRNA	grey	FALSE
ENSG00000260806		lncRNA	grey	FALSE
ENSG00000260855		lncRNA	grey	FALSE
ENSG00000260942	CAPN10-DT	lncRNA	grey	FALSE
ENSG00000261126	RBFADN	lncRNA	grey	FALSE
ENSG00000261186	LINC01238	lncRNA	grey	FALSE
ENSG00000261187		lncRNA	grey	FALSE
ENSG00000261188		lncRNA	grey	FALSE
ENSG00000261220		lncRNA	grey	FALSE
ENSG00000261490		lncRNA	grey	FALSE
ENSG00000261512		lncRNA	grey	FALSE
ENSG00000261652	C15orf65	protein_coding	grey	FALSE
ENSG00000261716	HIST2H2BC	transcribed_unprocessed_pseudogene	grey	FALSE
ENSG00000261737		lncRNA	grey	FALSE
ENSG00000261840		lncRNA	grey	FALSE
ENSG00000261879		lncRNA	grey	FALSE
ENSG00000262155	LINC02175	lncRNA	grey	FALSE
ENSG00000263002	ZNF234	protein_coding	grey	FALSE
ENSG00000263004		lncRNA	grey	FALSE
ENSG00000263006	ROCK1P1	transcribed_unprocessed_pseudogene	grey	FALSE
ENSG00000263069	RNF213-AS1	lncRNA	grey	FALSE
ENSG00000263257		lncRNA	grey	FALSE
ENSG00000263276		lncRNA	grey	FALSE
ENSG00000263327	TAPT1-AS1	lncRNA	grey	FALSE
ENSG00000263400	TMEM220-AS1	lncRNA	grey	FALSE
ENSG00000263412		lncRNA	grey	FALSE
ENSG00000263432	RN7SL689P	misc_RNA	grey	FALSE
ENSG00000263934	SNORD3A	snoRNA	grey	FALSE
ENSG00000264007		lncRNA	grey	FALSE
ENSG00000264204	AGAP7P	unprocessed_pseudogene	grey	FALSE
ENSG00000265018	AGAP12P	transcribed_unprocessed_pseudogene	grey	FALSE
ENSG00000265413		lncRNA	grey	FALSE
ENSG00000265458		lncRNA	grey	FALSE
ENSG00000265681	RPL17	protein_coding	grey	FALSE
ENSG00000266094	RASSF5	protein_coding	grey	FALSE
ENSG00000266538		lncRNA	grey	FALSE
ENSG00000266904	LINC00663	lncRNA	grey	FALSE
ENSG00000266946	MRPL37P1	processed_pseudogene	grey	FALSE
ENSG00000266967	AARSD1	protein_coding	grey	FALSE
ENSG00000267082		lncRNA	grey	FALSE
ENSG00000267106	ZNF561-AS1	lncRNA	grey	FALSE
ENSG00000267248		lncRNA	grey	FALSE
ENSG00000267296	CEBPA-DT	lncRNA	grey	FALSE
ENSG00000267321	SNHG30	lncRNA	grey	FALSE
ENSG00000267325	LINC01415	lncRNA	grey	FALSE
ENSG00000267419		transcribed_unprocessed_pseudogene	grey	FALSE
ENSG00000267481		lncRNA	grey	FALSE
ENSG00000267508	ZNF285	protein_coding	grey	FALSE
ENSG00000267632		lncRNA	grey	FALSE
ENSG00000267640		transcribed_unprocessed_pseudogene	grey	FALSE
ENSG00000267858	MZF1-AS1	lncRNA	grey	FALSE
ENSG00000267871	ZNF460-AS1	lncRNA	grey	FALSE
ENSG00000268006	PTOV1-AS1	lncRNA	grey	FALSE
ENSG00000268043	NBPF12	protein_coding	grey	FALSE
ENSG00000268225		unprocessed_pseudogene	grey	FALSE
ENSG00000268516		lncRNA	grey	FALSE
ENSG00000268575		lncRNA	grey	FALSE
ENSG00000268751	SCGB1B2P	lncRNA	grey	FALSE
ENSG00000268912		lncRNA	grey	FALSE
ENSG00000269001		transcribed_unprocessed_pseudogene	grey	FALSE
ENSG00000269019	HOMER3-AS1	lncRNA	grey	FALSE
ENSG00000269313	MAGIX	protein_coding	grey	FALSE
ENSG00000269399		lncRNA	grey	FALSE
ENSG00000269439		lncRNA	grey	FALSE
ENSG00000269609	RPARP-AS1	lncRNA	grey	FALSE
ENSG00000269696		lncRNA	grey	FALSE
ENSG00000269982		lncRNA	grey	FALSE
ENSG00000270020		lncRNA	grey	FALSE
ENSG00000270084	GAS5-AS1	lncRNA	grey	FALSE
ENSG00000270165		lncRNA	grey	FALSE
ENSG00000270344	POC1B-AS1	lncRNA	grey	FALSE
ENSG00000270392	PFN1P2	transcribed_processed_pseudogene	grey	FALSE
ENSG00000270638		lncRNA	grey	FALSE
ENSG00000270659		lncRNA	grey	FALSE
ENSG00000270673	YTHDF3-AS1	lncRNA	grey	FALSE
ENSG00000270820		lncRNA	grey	FALSE
ENSG00000270959	LPP-AS2	lncRNA	grey	FALSE
ENSG00000270964		lncRNA	grey	FALSE
ENSG00000271009		lncRNA	grey	FALSE
ENSG00000271147	ARMCX5-GPRASP2	lncRNA	grey	FALSE
ENSG00000271200		lncRNA	grey	FALSE
ENSG00000271270	TMCC1-AS1	lncRNA	grey	FALSE
ENSG00000271335		lncRNA	grey	FALSE
ENSG00000271380		lncRNA	grey	FALSE
ENSG00000271576		lncRNA	grey	FALSE
ENSG00000271643		lncRNA	grey	FALSE
ENSG00000271646		lncRNA	grey	FALSE
ENSG00000271913		lncRNA	grey	FALSE
ENSG00000271918		lncRNA	grey	FALSE
ENSG00000271937		lncRNA	grey	FALSE
ENSG00000271971		lncRNA	grey	FALSE
ENSG00000271993		lncRNA	grey	FALSE
ENSG00000272010		lncRNA	grey	FALSE
ENSG00000272024		lncRNA	grey	FALSE
ENSG00000272031	ANKRD34A	protein_coding	grey	FALSE
ENSG00000272054		lncRNA	grey	FALSE
ENSG00000272079		lncRNA	grey	FALSE
ENSG00000272086		lncRNA	grey	FALSE
ENSG00000272142		lncRNA	grey	FALSE
ENSG00000272195		lncRNA	grey	FALSE
ENSG00000272269		lncRNA	grey	FALSE
ENSG00000272277		lncRNA	grey	FALSE
ENSG00000272279		lncRNA	grey	FALSE
ENSG00000272345		lncRNA	grey	FALSE
ENSG00000272356		lncRNA	grey	FALSE
ENSG00000272374		lncRNA	grey	FALSE
ENSG00000272455		lncRNA	grey	FALSE
ENSG00000272505		lncRNA	grey	FALSE
ENSG00000272572		lncRNA	grey	FALSE
ENSG00000272604		lncRNA	grey	FALSE
ENSG00000272622		lncRNA	grey	FALSE
ENSG00000272630		lncRNA	grey	FALSE
ENSG00000272631		lncRNA	grey	FALSE
ENSG00000272690	LINC02018	lncRNA	grey	FALSE
ENSG00000272693		transcribed_unprocessed_pseudogene	grey	FALSE
ENSG00000272695	GAS6-DT	lncRNA	grey	FALSE
ENSG00000272758		lncRNA	grey	FALSE
ENSG00000272829		lncRNA	grey	FALSE
ENSG00000272848		lncRNA	grey	FALSE
ENSG00000272886	DCP1A	protein_coding	grey	FALSE
ENSG00000272894		lncRNA	grey	FALSE
ENSG00000272923		lncRNA	grey	FALSE
ENSG00000272936		lncRNA	grey	FALSE
ENSG00000272977		lncRNA	grey	FALSE
ENSG00000272994		lncRNA	grey	FALSE
ENSG00000273014		lncRNA	grey	FALSE
ENSG00000273066		lncRNA	grey	FALSE
ENSG00000273117		lncRNA	grey	FALSE
ENSG00000273226		lncRNA	grey	FALSE
ENSG00000273271		lncRNA	grey	FALSE
ENSG00000273295		lncRNA	grey	FALSE
ENSG00000273301		lncRNA	grey	FALSE
ENSG00000273314		lncRNA	grey	FALSE
ENSG00000273381		lncRNA	grey	FALSE
ENSG00000273382		lncRNA	grey	FALSE
ENSG00000273487		lncRNA	grey	FALSE
ENSG00000273619		lncRNA	grey	FALSE
ENSG00000273654		transcribed_processed_pseudogene	grey	FALSE
ENSG00000273702		lncRNA	grey	FALSE
ENSG00000273759		lncRNA	grey	FALSE
ENSG00000274104		lncRNA	grey	FALSE
ENSG00000274220		lncRNA	grey	FALSE
ENSG00000274330		unprocessed_pseudogene	grey	FALSE
ENSG00000274349	ZNF658	protein_coding	grey	FALSE
ENSG00000274460		lncRNA	grey	FALSE
ENSG00000274471		transcribed_unprocessed_pseudogene	grey	FALSE
ENSG00000274561		lncRNA	grey	FALSE
ENSG00000274642		unprocessed_pseudogene	grey	FALSE
ENSG00000274922		lncRNA	grey	FALSE
ENSG00000275055		lncRNA	grey	FALSE
ENSG00000275155		lncRNA	grey	FALSE
ENSG00000275441		lncRNA	grey	FALSE
ENSG00000275759		lncRNA	grey	FALSE
ENSG00000275764		lncRNA	grey	FALSE
ENSG00000275765		lncRNA	grey	FALSE
ENSG00000275807		lncRNA	grey	FALSE
ENSG00000275895	U2AF1L5	protein_coding	grey	FALSE
ENSG00000276023	DUSP14	protein_coding	grey	FALSE
ENSG00000276148		lncRNA	grey	FALSE
ENSG00000276168	RN7SL1	misc_RNA	grey	FALSE
ENSG00000276234	TADA2A	protein_coding	grey	FALSE
ENSG00000276256		protein_coding	grey	FALSE
ENSG00000276345		protein_coding	grey	FALSE
ENSG00000276547	PCDHGB5	protein_coding	grey	FALSE
ENSG00000277142	LINC00235	lncRNA	grey	FALSE
ENSG00000277196		protein_coding	grey	FALSE
ENSG00000277462	ZNF670	protein_coding	grey	FALSE
ENSG00000277476		lncRNA	grey	FALSE
ENSG00000277778	PGM5P2	transcribed_unprocessed_pseudogene	grey	FALSE
ENSG00000277879		lncRNA	grey	FALSE
ENSG00000278058		lncRNA	grey	FALSE
ENSG00000278156	TSC22D1-AS1	lncRNA	grey	FALSE
ENSG00000278311	GGNBP2	protein_coding	grey	FALSE
ENSG00000278318	ZNF229	protein_coding	grey	FALSE
ENSG00000278390		lncRNA	grey	FALSE
ENSG00000278662	GOLGA6L10	protein_coding	grey	FALSE
ENSG00000278864		TEC	grey	FALSE
ENSG00000278922		TEC	grey	FALSE
ENSG00000278983		TEC	grey	FALSE
ENSG00000279059		TEC	grey	FALSE
ENSG00000279066	HEXD-IT1	lncRNA	grey	FALSE
ENSG00000279089		TEC	grey	FALSE
ENSG00000279108		TEC	grey	FALSE
ENSG00000279170	TSTD3	protein_coding	grey	FALSE
ENSG00000279227		TEC	grey	FALSE
ENSG00000279344		TEC	grey	FALSE
ENSG00000279456		TEC	grey	FALSE
ENSG00000279520		TEC	grey	FALSE
ENSG00000279529		lncRNA	grey	FALSE
ENSG00000279591		TEC	grey	FALSE
ENSG00000279608		TEC	grey	FALSE
ENSG00000279622		lncRNA	grey	FALSE
ENSG00000279656		TEC	grey	FALSE
ENSG00000279696		TEC	grey	FALSE
ENSG00000279700		TEC	grey	FALSE
ENSG00000279759		TEC	grey	FALSE
ENSG00000280046		TEC	grey	FALSE
ENSG00000280088		TEC	grey	FALSE
ENSG00000280099		TEC	grey	FALSE
ENSG00000280128		TEC	grey	FALSE
ENSG00000280152		TEC	grey	FALSE
ENSG00000280187		TEC	grey	FALSE
ENSG00000280214		TEC	grey	FALSE
ENSG00000280401		TEC	grey	FALSE
ENSG00000280434		lncRNA	grey	FALSE
ENSG00000280670	CCDC163	protein_coding	grey	FALSE
ENSG00000280739	EIF1B-AS1	lncRNA	grey	FALSE
ENSG00000280789	PAGR1	protein_coding	grey	FALSE
ENSG00000281005	LINC00921	lncRNA	grey	FALSE
ENSG00000281332	LINC00997	lncRNA	grey	FALSE
ENSG00000281392		lncRNA	grey	FALSE
ENSG00000281538		lncRNA	grey	FALSE
ENSG00000281912	LINC01144	lncRNA	grey	FALSE
ENSG00000281969		TEC	grey	FALSE
ENSG00000282164	PEG13	lncRNA	grey	FALSE
ENSG00000283341		lncRNA	grey	FALSE
ENSG00000283696		lncRNA	grey	FALSE
ENSG00000284391		lncRNA	grey	FALSE
ENSG00000284693	LINC02606	lncRNA	grey	FALSE
ENSG00000284770	TBCE	protein_coding	grey	FALSE
ENSG00000285106		lncRNA	grey	FALSE
ENSG00000285188		protein_coding	grey	FALSE
ENSG00000285219	HULC	lncRNA	grey	FALSE
ENSG00000285280		lncRNA	grey	FALSE
ENSG00000285331		lncRNA	grey	FALSE
ENSG00000285667		lncRNA	grey	FALSE
ENSG00000285668		lncRNA	grey	FALSE
ENSG00000285693		lncRNA	grey	FALSE
ENSG00000285825	CCDC15-DT	lncRNA	grey	FALSE
ENSG00000285867		lncRNA	grey	FALSE
ENSG00000285886		lncRNA	grey	FALSE
ENSG00000286156		transcribed_unprocessed_pseudogene	grey	FALSE
ENSG00000286191		lncRNA	grey	FALSE
ENSG00000286193		lncRNA	grey	FALSE
ENSG00000286511		lncRNA	grey	FALSE
ENSG00000286615		lncRNA	grey	FALSE
ENSG00000286619		lncRNA	grey	FALSE
ENSG00000286782		lncRNA	grey	FALSE
ENSG00000286818		lncRNA	grey	FALSE
ENSG00000286964		lncRNA	grey	FALSE
ENSG00000287146		lncRNA	grey	FALSE
ENSG00000287151		lncRNA	grey	FALSE
ENSG00000287401		lncRNA	grey	FALSE
ENSG00000287483		lncRNA	grey	FALSE
ENSG00000287539		lncRNA	grey	FALSE
ENSG00000287671		lncRNA	grey	FALSE
ENSG00000287720		lncRNA	grey	FALSE
ENSG00000287725		protein_coding	grey	FALSE
ENSG00000287737		lncRNA	grey	FALSE
ENSG00000287875		lncRNA	grey	FALSE
ENSG00000288061		lncRNA	grey	FALSE
ENSG00000288162		lncRNA	grey	FALSE
ENSG00000004478	FKBP4	protein_coding	M.1	FALSE
ENSG00000005007	UPF1	protein_coding	M.1	FALSE
ENSG00000007866	TEAD3	protein_coding	M.1	FALSE
ENSG00000009830	POMT2	protein_coding	M.1	FALSE
ENSG00000014216	CAPN1	protein_coding	M.1	FALSE
ENSG00000020129	NCDN	protein_coding	M.1	FALSE
ENSG00000034152	MAP2K3	protein_coding	M.1	FALSE
ENSG00000049769	PPP1R3F	protein_coding	M.1	FALSE
ENSG00000052749	RRP12	protein_coding	M.1	FALSE
ENSG00000065000	AP3D1	protein_coding	M.1	FALSE
ENSG00000066044	ELAVL1	protein_coding	M.1	FALSE
ENSG00000068308	OTUD5	protein_coding	M.1	FALSE
ENSG00000068971	PPP2R5B	protein_coding	M.1	FALSE
ENSG00000077235	GTF3C1	protein_coding	M.1	FALSE
ENSG00000079805	DNM2	protein_coding	M.1	FALSE
ENSG00000088888	MAVS	protein_coding	M.1	FALSE
ENSG00000088899	LZTS3	protein_coding	M.1	FALSE
ENSG00000089351	GRAMD1A	protein_coding	M.1	FALSE
ENSG00000100023	PPIL2	protein_coding	M.1	FALSE
ENSG00000103043	VAC14	protein_coding	M.1	FALSE
ENSG00000104812	GYS1	protein_coding	M.1	FALSE
ENSG00000105298	CACTIN	protein_coding	M.1	FALSE
ENSG00000105355	PLIN3	protein_coding	M.1	FALSE
ENSG00000105429	MEGF8	protein_coding	M.1	FALSE
ENSG00000107021	TBC1D13	protein_coding	M.1	FALSE
ENSG00000108312	UBTF	protein_coding	M.1	FALSE
ENSG00000108883	EFTUD2	protein_coding	M.1	FALSE
ENSG00000110046	ATG2A	protein_coding	M.1	FALSE
ENSG00000110844	PRPF40B	protein_coding	M.1	FALSE
ENSG00000111667	USP5	protein_coding	M.1	FALSE
ENSG00000112640	PPP2R5D	protein_coding	M.1	FALSE
ENSG00000116871	MAP7D1	protein_coding	M.1	FALSE
ENSG00000117408	IPO13	protein_coding	M.1	FALSE
ENSG00000124313	IQSEC2	protein_coding	M.1	FALSE
ENSG00000124587	PEX6	protein_coding	M.1	FALSE
ENSG00000125741	OPA3	protein_coding	M.1	FALSE
ENSG00000126107	HECTD3	protein_coding	M.1	FALSE
ENSG00000129170	CSRP3	protein_coding	M.1	FALSE
ENSG00000129925	TMEM8A	protein_coding	M.1	FALSE
ENSG00000130119	GNL3L	protein_coding	M.1	FALSE
ENSG00000130304	SLC27A1	protein_coding	M.1	FALSE
ENSG00000130528	HRC	protein_coding	M.1	FALSE
ENSG00000130653	PNPLA7	protein_coding	M.1	FALSE
ENSG00000130985	UBA1	protein_coding	M.1	FALSE
ENSG00000132763	MMACHC	protein_coding	M.1	FALSE
ENSG00000135424	ITGA7	protein_coding	M.1	FALSE
ENSG00000135723	FHOD1	protein_coding	M.1	FALSE
ENSG00000136715	SAP130	protein_coding	M.1	FALSE
ENSG00000138107	ACTR1A	protein_coding	M.1	FALSE
ENSG00000138136	LBX1	protein_coding	M.1	FALSE
ENSG00000139438	FAM222A	protein_coding	M.1	FALSE
ENSG00000140521	POLG	protein_coding	M.1	FALSE
ENSG00000143303	RRNAD1	protein_coding	M.1	FALSE
ENSG00000144485	HES6	protein_coding	M.1	FALSE
ENSG00000144868	TMEM108	protein_coding	M.1	FALSE
ENSG00000145945	FAM50B	protein_coding	M.1	FALSE
ENSG00000146147	MLIP	protein_coding	M.1	FALSE
ENSG00000149091	DGKZ	protein_coding	M.1	FALSE
ENSG00000149182	ARFGAP2	protein_coding	M.1	FALSE
ENSG00000150990	DHX37	protein_coding	M.1	FALSE
ENSG00000156381	ANKRD9	protein_coding	M.1	FALSE
ENSG00000157119	KLHL40	protein_coding	M.1	FALSE
ENSG00000158156	XKR8	protein_coding	M.1	FALSE
ENSG00000158480	SPATA2	protein_coding	M.1	FALSE
ENSG00000160285	LSS	protein_coding	M.1	FALSE
ENSG00000160460	SPTBN4	protein_coding	M.1	FALSE
ENSG00000161011	SQSTM1	protein_coding	M.1	FALSE
ENSG00000162065	TBC1D24	protein_coding	M.1	FALSE
ENSG00000162129	CLPB	protein_coding	M.1	FALSE
ENSG00000163884	KLF15	protein_coding	M.1	FALSE
ENSG00000163930	BAP1	protein_coding	M.1	FALSE
ENSG00000165280	VCP	protein_coding	M.1	FALSE
ENSG00000165458	INPPL1	protein_coding	M.1	FALSE
ENSG00000165527	ARF6	protein_coding	M.1	FALSE
ENSG00000167110	GOLGA2	protein_coding	M.1	FALSE
ENSG00000167549	CORO6	protein_coding	M.1	FALSE
ENSG00000167971	CASKIN1	protein_coding	M.1	FALSE
ENSG00000167977	KCTD5	protein_coding	M.1	FALSE
ENSG00000168612	ZSWIM1	protein_coding	M.1	FALSE
ENSG00000168936	TMEM129	protein_coding	M.1	FALSE
ENSG00000169696	ASPSCR1	protein_coding	M.1	FALSE
ENSG00000171298	GAA	protein_coding	M.1	FALSE
ENSG00000171853	TRAPPC12	protein_coding	M.1	FALSE
ENSG00000172732	MUS81	protein_coding	M.1	FALSE
ENSG00000173641	HSPB7	protein_coding	M.1	FALSE
ENSG00000175931	UBE2O	protein_coding	M.1	FALSE
ENSG00000178605	GTPBP6	protein_coding	M.1	FALSE
ENSG00000181027	FKRP	protein_coding	M.1	FALSE
ENSG00000183597	TANGO2	protein_coding	M.1	FALSE
ENSG00000183963	SMTN	protein_coding	M.1	FALSE
ENSG00000184058	TBX1	protein_coding	M.1	FALSE
ENSG00000184545	DUSP8	protein_coding	M.1	FALSE
ENSG00000188322	SBK1	protein_coding	M.1	FALSE
ENSG00000188338	SLC38A3	protein_coding	M.1	FALSE
ENSG00000189091	SF3B3	protein_coding	M.1	FALSE
ENSG00000189319	FAM53B	protein_coding	M.1	FALSE
ENSG00000196388	INCA1	protein_coding	M.1	FALSE
ENSG00000196814	MVB12B	protein_coding	M.1	FALSE
ENSG00000197296	FITM2	protein_coding	M.1	FALSE
ENSG00000197530	MIB2	protein_coding	M.1	FALSE
ENSG00000197859	ADAMTSL2	protein_coding	M.1	FALSE
ENSG00000198355	PIM3	protein_coding	M.1	FALSE
ENSG00000198952	SMG5	protein_coding	M.1	FALSE
ENSG00000218739	CEBPZOS	protein_coding	M.1	FALSE
ENSG00000223496	EXOSC6	protein_coding	M.1	FALSE
ENSG00000223774		lncRNA	M.1	FALSE
ENSG00000231274	SBK3	protein_coding	M.1	FALSE
ENSG00000241360	PDXP	protein_coding	M.1	FALSE
ENSG00000247077	PGAM5	protein_coding	M.1	FALSE
ENSG00000255182		lncRNA	M.1	FALSE
ENSG00000259330	INAFM2	protein_coding	M.1	FALSE
ENSG00000261168		lncRNA	M.1	FALSE
ENSG00000273137		lncRNA	M.1	FALSE
ENSG00000273145		lncRNA	M.1	FALSE
ENSG00000279164		TEC	M.1	FALSE
ENSG00000280213	UCKL1-AS1	lncRNA	M.1	FALSE
ENSG00000036672	USP2	protein_coding	M.1	TRUE
ENSG00000065989	PDE4A	protein_coding	M.1	TRUE
ENSG00000099821	POLRMT	protein_coding	M.1	TRUE
ENSG00000103932	RPAP1	protein_coding	M.1	TRUE
ENSG00000105357	MYH14	protein_coding	M.1	TRUE
ENSG00000129245	FXR2	protein_coding	M.1	TRUE
ENSG00000132361	CLUH	protein_coding	M.1	TRUE
ENSG00000142002	DPP9	protein_coding	M.1	TRUE
ENSG00000143434	SEMA6C	protein_coding	M.1	TRUE
ENSG00000151929	BAG3	protein_coding	M.1	TRUE
ENSG00000154358	OBSCN	protein_coding	M.1	TRUE
ENSG00000160445	ZER1	protein_coding	M.1	TRUE
ENSG00000162104	ADCY9	protein_coding	M.1	TRUE
ENSG00000177238	TRIM72	protein_coding	M.1	TRUE
ENSG00000177731	FLII	protein_coding	M.1	TRUE
ENSG00000178209	PLEC	protein_coding	M.1	TRUE
ENSG00000186868	MAPT	protein_coding	M.1	TRUE
ENSG00000188026	RILPL1	protein_coding	M.1	TRUE
ENSG00000198837	DENND4B	protein_coding	M.1	TRUE
ENSG00000204463	BAG6	protein_coding	M.1	TRUE
ENSG00000000005	TNMD	protein_coding	M.10	FALSE
ENSG00000000971	CFH	protein_coding	M.10	FALSE
ENSG00000002586	CD99	protein_coding	M.10	FALSE
ENSG00000002834	LASP1	protein_coding	M.10	FALSE
ENSG00000002933	TMEM176A	protein_coding	M.10	FALSE
ENSG00000003436	TFPI	protein_coding	M.10	FALSE
ENSG00000004139	SARM1	protein_coding	M.10	FALSE
ENSG00000005059	MCUB	protein_coding	M.10	FALSE
ENSG00000005513	SOX8	protein_coding	M.10	FALSE
ENSG00000005810	MYCBP2	protein_coding	M.10	FALSE
ENSG00000006042	TMEM98	protein_coding	M.10	FALSE
ENSG00000006283	CACNA1G	protein_coding	M.10	FALSE
ENSG00000006468	ETV1	protein_coding	M.10	FALSE
ENSG00000006534	ALDH3B1	protein_coding	M.10	FALSE
ENSG00000007384	RHBDF1	protein_coding	M.10	FALSE
ENSG00000009694	TENM1	protein_coding	M.10	FALSE
ENSG00000011028	MRC2	protein_coding	M.10	FALSE
ENSG00000011465	DCN	protein_coding	M.10	FALSE
ENSG00000012171	SEMA3B	protein_coding	M.10	FALSE
ENSG00000013016	EHD3	protein_coding	M.10	FALSE
ENSG00000013288	MAN2B2	protein_coding	M.10	FALSE
ENSG00000013297	CLDN11	protein_coding	M.10	FALSE
ENSG00000013588	GPRC5A	protein_coding	M.10	FALSE
ENSG00000016864	GLT8D1	protein_coding	M.10	FALSE
ENSG00000017483	SLC38A5	protein_coding	M.10	FALSE
ENSG00000019169	MARCO	protein_coding	M.10	FALSE
ENSG00000019991	HGF	protein_coding	M.10	FALSE
ENSG00000021355	SERPINB1	protein_coding	M.10	FALSE
ENSG00000021645	NRXN3	protein_coding	M.10	FALSE
ENSG00000026508	CD44	protein_coding	M.10	FALSE
ENSG00000028277	POU2F2	protein_coding	M.10	FALSE
ENSG00000030582	GRN	protein_coding	M.10	FALSE
ENSG00000031003	FAM13B	protein_coding	M.10	FALSE
ENSG00000033011	ALG1	protein_coding	M.10	FALSE
ENSG00000033100	CHPF2	protein_coding	M.10	FALSE
ENSG00000034971	MYOC	protein_coding	M.10	FALSE
ENSG00000037042	TUBG2	protein_coding	M.10	FALSE
ENSG00000038210	PI4K2B	protein_coding	M.10	FALSE
ENSG00000038427	VCAN	protein_coding	M.10	FALSE
ENSG00000039560	RAI14	protein_coding	M.10	FALSE
ENSG00000041982	TNC	protein_coding	M.10	FALSE
ENSG00000042286	AIFM2	protein_coding	M.10	FALSE
ENSG00000044459	CNTLN	protein_coding	M.10	FALSE
ENSG00000044524	EPHA3	protein_coding	M.10	FALSE
ENSG00000046647	GEMIN8	protein_coding	M.10	FALSE
ENSG00000046653	GPM6B	protein_coding	M.10	FALSE
ENSG00000047578	KIAA0556	protein_coding	M.10	FALSE
ENSG00000048471	SNX29	protein_coding	M.10	FALSE
ENSG00000048740	CELF2	protein_coding	M.10	FALSE
ENSG00000049089	COL9A2	protein_coding	M.10	FALSE
ENSG00000049192	ADAMTS6	protein_coding	M.10	FALSE
ENSG00000049540	ELN	protein_coding	M.10	FALSE
ENSG00000049860	HEXB	protein_coding	M.10	FALSE
ENSG00000050327	ARHGEF5	protein_coding	M.10	FALSE
ENSG00000052126	PLEKHA5	protein_coding	M.10	FALSE
ENSG00000054267	ARID4B	protein_coding	M.10	FALSE
ENSG00000055732	MCOLN3	protein_coding	M.10	FALSE
ENSG00000058085	LAMC2	protein_coding	M.10	FALSE
ENSG00000058866	DGKG	protein_coding	M.10	FALSE
ENSG00000059573	ALDH18A1	protein_coding	M.10	FALSE
ENSG00000060718	COL11A1	protein_coding	M.10	FALSE
ENSG00000061455	PRDM6	protein_coding	M.10	FALSE
ENSG00000062716	VMP1	protein_coding	M.10	FALSE
ENSG00000064205	CCN5	protein_coding	M.10	FALSE
ENSG00000064300	NGFR	protein_coding	M.10	FALSE
ENSG00000064309	CDON	protein_coding	M.10	FALSE
ENSG00000064655	EYA2	protein_coding	M.10	FALSE
ENSG00000064666	CNN2	protein_coding	M.10	FALSE
ENSG00000064692	SNCAIP	protein_coding	M.10	FALSE
ENSG00000064763	FAR2	protein_coding	M.10	FALSE
ENSG00000065308	TRAM2	protein_coding	M.10	FALSE
ENSG00000065809	FAM107B	protein_coding	M.10	FALSE
ENSG00000066248	NGEF	protein_coding	M.10	FALSE
ENSG00000066427	ATXN3	protein_coding	M.10	FALSE
ENSG00000067113	PLPP1	protein_coding	M.10	FALSE
ENSG00000067182	TNFRSF1A	protein_coding	M.10	FALSE
ENSG00000067560	RHOA	protein_coding	M.10	FALSE
ENSG00000067798	NAV3	protein_coding	M.10	FALSE
ENSG00000067900	ROCK1	protein_coding	M.10	FALSE
ENSG00000067992	PDK3	protein_coding	M.10	FALSE
ENSG00000068323	TFE3	protein_coding	M.10	FALSE
ENSG00000068697	LAPTM4A	protein_coding	M.10	FALSE
ENSG00000068796	KIF2A	protein_coding	M.10	FALSE
ENSG00000069943	PIGB	protein_coding	M.10	FALSE
ENSG00000069966	GNB5	protein_coding	M.10	FALSE
ENSG00000070214	SLC44A1	protein_coding	M.10	FALSE
ENSG00000070404	FSTL3	protein_coding	M.10	FALSE
ENSG00000070444	MNT	protein_coding	M.10	FALSE
ENSG00000072042	RDH11	protein_coding	M.10	FALSE
ENSG00000072071	ADGRL1	protein_coding	M.10	FALSE
ENSG00000072133	RPS6KA6	protein_coding	M.10	FALSE
ENSG00000072832	CRMP1	protein_coding	M.10	FALSE
ENSG00000072840	EVC	protein_coding	M.10	FALSE
ENSG00000073150	PANX2	protein_coding	M.10	FALSE
ENSG00000073792	IGF2BP2	protein_coding	M.10	FALSE
ENSG00000074047	GLI2	protein_coding	M.10	FALSE
ENSG00000074211	PPP2R2C	protein_coding	M.10	FALSE
ENSG00000074219	TEAD2	protein_coding	M.10	FALSE
ENSG00000074410	CA12	protein_coding	M.10	FALSE
ENSG00000074842	MYDGF	protein_coding	M.10	FALSE
ENSG00000075035	WSCD2	protein_coding	M.10	FALSE
ENSG00000076344	RGS11	protein_coding	M.10	FALSE
ENSG00000077063	CTTNBP2	protein_coding	M.10	FALSE
ENSG00000077264	PAK3	protein_coding	M.10	FALSE
ENSG00000077585	GPR137B	protein_coding	M.10	FALSE
ENSG00000077616	NAALAD2	protein_coding	M.10	FALSE
ENSG00000077782	FGFR1	protein_coding	M.10	FALSE
ENSG00000077942	FBLN1	protein_coding	M.10	FALSE
ENSG00000078053	AMPH	protein_coding	M.10	FALSE
ENSG00000078596	ITM2A	protein_coding	M.10	FALSE
ENSG00000079150	FKBP7	protein_coding	M.10	FALSE
ENSG00000079691	CARMIL1	protein_coding	M.10	FALSE
ENSG00000081377	CDC14B	protein_coding	M.10	FALSE
ENSG00000081721	DUSP12	protein_coding	M.10	FALSE
ENSG00000082196	C1QTNF3	protein_coding	M.10	FALSE
ENSG00000082397	EPB41L3	protein_coding	M.10	FALSE
ENSG00000082458	DLG3	protein_coding	M.10	FALSE
ENSG00000082482	KCNK2	protein_coding	M.10	FALSE
ENSG00000082497	SERTAD4	protein_coding	M.10	FALSE
ENSG00000082781	ITGB5	protein_coding	M.10	FALSE
ENSG00000083857	FAT1	protein_coding	M.10	FALSE
ENSG00000084636	COL16A1	protein_coding	M.10	FALSE
ENSG00000084731	KIF3C	protein_coding	M.10	FALSE
ENSG00000085563	ABCB1	protein_coding	M.10	FALSE
ENSG00000086544	ITPKC	protein_coding	M.10	FALSE
ENSG00000086991	NOX4	protein_coding	M.10	FALSE
ENSG00000087077	TRIP6	protein_coding	M.10	FALSE
ENSG00000087086	FTL	protein_coding	M.10	FALSE
ENSG00000087245	MMP2	protein_coding	M.10	FALSE
ENSG00000087253	LPCAT2	protein_coding	M.10	FALSE
ENSG00000087494	PTHLH	protein_coding	M.10	FALSE
ENSG00000087903	RFX2	protein_coding	M.10	FALSE
ENSG00000088882	CPXM1	protein_coding	M.10	FALSE
ENSG00000088986	DYNLL1	protein_coding	M.10	FALSE
ENSG00000089041	P2RX7	protein_coding	M.10	FALSE
ENSG00000090006	LTBP4	protein_coding	M.10	FALSE
ENSG00000090530	P3H2	protein_coding	M.10	FALSE
ENSG00000090539	CHRD	protein_coding	M.10	FALSE
ENSG00000090971	NAT14	protein_coding	M.10	FALSE
ENSG00000091972	CD200	protein_coding	M.10	FALSE
ENSG00000091986	CCDC80	protein_coding	M.10	FALSE
ENSG00000092096	SLC22A17	protein_coding	M.10	FALSE
ENSG00000092758	COL9A3	protein_coding	M.10	FALSE
ENSG00000092964	DPYSL2	protein_coding	M.10	FALSE
ENSG00000095303	PTGS1	protein_coding	M.10	FALSE
ENSG00000095397	WHRN	protein_coding	M.10	FALSE
ENSG00000095713	CRTAC1	protein_coding	M.10	FALSE
ENSG00000095739	BAMBI	protein_coding	M.10	FALSE
ENSG00000096092	TMEM14A	protein_coding	M.10	FALSE
ENSG00000097007	ABL1	protein_coding	M.10	FALSE
ENSG00000099139	PCSK5	protein_coding	M.10	FALSE
ENSG00000099204	ABLIM1	protein_coding	M.10	FALSE
ENSG00000099256	PRTFDC1	protein_coding	M.10	FALSE
ENSG00000099308	MAST3	protein_coding	M.10	FALSE
ENSG00000099365	STX1B	protein_coding	M.10	FALSE
ENSG00000099860	GADD45B	protein_coding	M.10	FALSE
ENSG00000099864	PALM	protein_coding	M.10	FALSE
ENSG00000100084	HIRA	protein_coding	M.10	FALSE
ENSG00000100100	PIK3IP1	protein_coding	M.10	FALSE
ENSG00000100196	KDELR3	protein_coding	M.10	FALSE
ENSG00000100243	CYB5R3	protein_coding	M.10	FALSE
ENSG00000100271	TTLL1	protein_coding	M.10	FALSE
ENSG00000100364	KIAA0930	protein_coding	M.10	FALSE
ENSG00000100399	CHADL	protein_coding	M.10	FALSE
ENSG00000100417	PMM1	protein_coding	M.10	FALSE
ENSG00000100626	GALNT16	protein_coding	M.10	FALSE
ENSG00000100711	ZFYVE21	protein_coding	M.10	FALSE
ENSG00000100842	EFS	protein_coding	M.10	FALSE
ENSG00000100889	PCK2	protein_coding	M.10	FALSE
ENSG00000100926	TM9SF1	protein_coding	M.10	FALSE
ENSG00000100979	PLTP	protein_coding	M.10	FALSE
ENSG00000101000	PROCR	protein_coding	M.10	FALSE
ENSG00000101098	RIMS4	protein_coding	M.10	FALSE
ENSG00000101109	STK4	protein_coding	M.10	FALSE
ENSG00000101144	BMP7	protein_coding	M.10	FALSE
ENSG00000101160	CTSZ	protein_coding	M.10	FALSE
ENSG00000101265	RASSF2	protein_coding	M.10	FALSE
ENSG00000101294	HM13	protein_coding	M.10	FALSE
ENSG00000101333	PLCB4	protein_coding	M.10	FALSE
ENSG00000101350	KIF3B	protein_coding	M.10	FALSE
ENSG00000101439	CST3	protein_coding	M.10	FALSE
ENSG00000101773	RBBP8	protein_coding	M.10	FALSE
ENSG00000101825	MXRA5	protein_coding	M.10	FALSE
ENSG00000101856	PGRMC1	protein_coding	M.10	FALSE
ENSG00000101938	CHRDL1	protein_coding	M.10	FALSE
ENSG00000101955	SRPX	protein_coding	M.10	FALSE
ENSG00000101974	ATP11C	protein_coding	M.10	FALSE
ENSG00000102003	SYP	protein_coding	M.10	FALSE
ENSG00000102007	PLP2	protein_coding	M.10	FALSE
ENSG00000102109	PCSK1N	protein_coding	M.10	FALSE
ENSG00000102265	TIMP1	protein_coding	M.10	FALSE
ENSG00000102302	FGD1	protein_coding	M.10	FALSE
ENSG00000102359	SRPX2	protein_coding	M.10	FALSE
ENSG00000102362	SYTL4	protein_coding	M.10	FALSE
ENSG00000102383	ZDHHC15	protein_coding	M.10	FALSE
ENSG00000102409	BEX4	protein_coding	M.10	FALSE
ENSG00000102445	RUBCNL	protein_coding	M.10	FALSE
ENSG00000102547	CAB39L	protein_coding	M.10	FALSE
ENSG00000102802	MEDAG	protein_coding	M.10	FALSE
ENSG00000103005	USB1	protein_coding	M.10	FALSE
ENSG00000103196	CRISPLD2	protein_coding	M.10	FALSE
ENSG00000103528	SYT17	protein_coding	M.10	FALSE
ENSG00000103647	CORO2B	protein_coding	M.10	FALSE
ENSG00000103855	CD276	protein_coding	M.10	FALSE
ENSG00000104081	BMF	protein_coding	M.10	FALSE
ENSG00000104205	SGK3	protein_coding	M.10	FALSE
ENSG00000104213	PDGFRL	protein_coding	M.10	FALSE
ENSG00000104324	CPQ	protein_coding	M.10	FALSE
ENSG00000104332	SFRP1	protein_coding	M.10	FALSE
ENSG00000104368	PLAT	protein_coding	M.10	FALSE
ENSG00000104415	CCN4	protein_coding	M.10	FALSE
ENSG00000104419	NDRG1	protein_coding	M.10	FALSE
ENSG00000104447	TRPS1	protein_coding	M.10	FALSE
ENSG00000104549	SQLE	protein_coding	M.10	FALSE
ENSG00000104611	SH2D4A	protein_coding	M.10	FALSE
ENSG00000104722	NEFM	protein_coding	M.10	FALSE
ENSG00000104870	FCGRT	protein_coding	M.10	FALSE
ENSG00000105245	NUMBL	protein_coding	M.10	FALSE
ENSG00000105270	CLIP3	protein_coding	M.10	FALSE
ENSG00000105281	SLC1A5	protein_coding	M.10	FALSE
ENSG00000105419	MEIS3	protein_coding	M.10	FALSE
ENSG00000105426	PTPRS	protein_coding	M.10	FALSE
ENSG00000105559	PLEKHA4	protein_coding	M.10	FALSE
ENSG00000105664	COMP	protein_coding	M.10	FALSE
ENSG00000105771	SMG9	protein_coding	M.10	FALSE
ENSG00000105894	PTN	protein_coding	M.10	FALSE
ENSG00000106003	LFNG	protein_coding	M.10	FALSE
ENSG00000106025	TSPAN12	protein_coding	M.10	FALSE
ENSG00000106261	ZKSCAN1	protein_coding	M.10	FALSE
ENSG00000106333	PCOLCE	protein_coding	M.10	FALSE
ENSG00000106366	SERPINE1	protein_coding	M.10	FALSE
ENSG00000106483	SFRP4	protein_coding	M.10	FALSE
ENSG00000106484	MEST	protein_coding	M.10	FALSE
ENSG00000106511	MEOX2	protein_coding	M.10	FALSE
ENSG00000106565	TMEM176B	protein_coding	M.10	FALSE
ENSG00000106571	GLI3	protein_coding	M.10	FALSE
ENSG00000106638	TBL2	protein_coding	M.10	FALSE
ENSG00000106665	CLIP2	protein_coding	M.10	FALSE
ENSG00000106789	CORO2A	protein_coding	M.10	FALSE
ENSG00000106809	OGN	protein_coding	M.10	FALSE
ENSG00000106819	ASPN	protein_coding	M.10	FALSE
ENSG00000106823	ECM2	protein_coding	M.10	FALSE
ENSG00000106976	DNM1	protein_coding	M.10	FALSE
ENSG00000107130	NCS1	protein_coding	M.10	FALSE
ENSG00000107338	SHB	protein_coding	M.10	FALSE
ENSG00000107521	HPS1	protein_coding	M.10	FALSE
ENSG00000107566	ERLIN1	protein_coding	M.10	FALSE
ENSG00000107614	TRDMT1	protein_coding	M.10	FALSE
ENSG00000107968	MAP3K8	protein_coding	M.10	FALSE
ENSG00000108175	ZMIZ1	protein_coding	M.10	FALSE
ENSG00000108370	RGS9	protein_coding	M.10	FALSE
ENSG00000108479	GALK1	protein_coding	M.10	FALSE
ENSG00000108604	SMARCD2	protein_coding	M.10	FALSE
ENSG00000108641	B9D1	protein_coding	M.10	FALSE
ENSG00000108679	LGALS3BP	protein_coding	M.10	FALSE
ENSG00000108784	NAGLU	protein_coding	M.10	FALSE
ENSG00000108821	COL1A1	protein_coding	M.10	FALSE
ENSG00000108829	LRRC59	protein_coding	M.10	FALSE
ENSG00000108924	HLF	protein_coding	M.10	FALSE
ENSG00000108950	FAM20A	protein_coding	M.10	FALSE
ENSG00000109099	PMP22	protein_coding	M.10	FALSE
ENSG00000109113	RAB34	protein_coding	M.10	FALSE
ENSG00000109610	SOD3	protein_coding	M.10	FALSE
ENSG00000109654	TRIM2	protein_coding	M.10	FALSE
ENSG00000109736	MFSD10	protein_coding	M.10	FALSE
ENSG00000109743	BST1	protein_coding	M.10	FALSE
ENSG00000109814	UGDH	protein_coding	M.10	FALSE
ENSG00000109861	CTSC	protein_coding	M.10	FALSE
ENSG00000110042	DTX4	protein_coding	M.10	FALSE
ENSG00000110076	NRXN2	protein_coding	M.10	FALSE
ENSG00000110318	CEP126	protein_coding	M.10	FALSE
ENSG00000110651	CD81	protein_coding	M.10	FALSE
ENSG00000110811	P3H3	protein_coding	M.10	FALSE
ENSG00000110881	ASIC1	protein_coding	M.10	FALSE
ENSG00000111057	KRT18	protein_coding	M.10	FALSE
ENSG00000111186	WNT5B	protein_coding	M.10	FALSE
ENSG00000111196	MAGOHB	protein_coding	M.10	FALSE
ENSG00000111321	LTBR	protein_coding	M.10	FALSE
ENSG00000111341	MGP	protein_coding	M.10	FALSE
ENSG00000111450	STX2	protein_coding	M.10	FALSE
ENSG00000111452	ADGRD1	protein_coding	M.10	FALSE
[truncated: 13,570 more rows]
