# Supplementary material for: A transcriptome atlas of leg muscles from healthy human volunteers reveals molecular and cellular signatures associated with muscle location
Source: eLife. 2023 Feb 6;12:e80500. doi: 10.7554/eLife.80500 (PMC9988256; doi:10.7554/eLife.80500)
Supplement: Supplementary file 7. [file elife-80500-supp7.xls]

## Sheet: overview
Supplementary Table S7. List of enriched biological processes and molecular functions within modules.
module	The module of co-expressed genes based on the WGCNA (weighted gene co-expression network analysis).
term ID	The id for the associated biological processes based on the functional enrichment analysis using ClueGO App in Cytoscape.
term	The terms for the associated biological processes based on the functional enrichment analysis using ClueGO App in Cytoscape.
FDR	The Benjamini-Hochberg false-discovery rate (FDR) for the associated biological processes.
#enriched genes	Number of genes associated to the associated biological process.
associated genes	Genes associated to the associated biological process (gene symbol based on ensembl version 98 (http://sep2019.archive.ensembl.org/) are used).
hub genes	Highly interconnected genes associated to the associated biological process.
transcription factors	Transcription factors associated to the associated biological process.
Pathways and gene annotations are from Kyoto Encyclopedia of Genes and Genomes (KEGG), Gene Ontology (GO), Reactome, and WikiPathways (WP)

## Sheet: SupplementaryTableS7
module	term ID	term	FDR	#enriched genes	associated genes	hub genes	transcription factors
M.1	GO:0006515	protein quality control for misfolded or incompletely synthesized proteins	0.00226963	4	[BAG6, POMT2, VCP, ZER1]	BAG6, ZER1
M.1	GO:0034605	cellular response to heat	0.0112516	5	[BAG3, CLPB, FKBP4, MAPT, VCP]	BAG3, MAPT
M.1	GO:0030516	regulation of axon extension	0.0132816	4	[DNM2, MAPT, MEGF8, SEMA6C]	MAPT, SEMA6C
M.1	R-HSA:9007101	Rab regulation of trafficking	0.0137038	5	[ARF6, DENND4B, TBC1D13, TBC1D24, TRAPPC12]	DENND4B
M.1	GO:0007009	plasma membrane organization	0.0137109	4	[CSRP3, DNM2, TRIM72, XKR8]	TRIM72
M.11	GO:0030042	actin filament depolymerization	4.41978e-05	9	[ADD3, CAPZA1, LIMA1, PLEKHH2, SEMA5A, SWAP70, TMOD2, TMOD3, TWF1]	ADD3
M.11	GO:0000139	Golgi membrane	0.00180643	30	[ARFIP1, ASAP2, CHST15, CYTH3, DENND5A, DSE, FUT8, GALNT12, GALNT15, GALNT7, GJA1, GLCE, GOLGB1, LEPROT, MAN1A1, PLPP3, RAB2B, RNF24, SEC24D, SGMS2, SLC10A7, SLC35A5, STX6, TLR3, TMEM165, TMEM87A, TMEM87B, UGCG, USP6NL, XYLT1]	ASAP2, MAN1A1
M.11	GO:0009101	glycoprotein biosynthetic process	0.00202556	17	[CHST15, DPY19L1, DSE, FUT8, GALNT12, GALNT15, GALNT7, GLCE, MAGT1, MAN1A1, PGM3, POGLUT1, SOAT1, TCF7L2, TMEM165, TRAK2, XYLT1]	MAN1A1	TCF7L2
M.11	GO:0060368	regulation of Fc receptor mediated stimulatory signaling pathway	0.00230817	4	[APLP2, APPL2, CD47, PLSCR1]		PLSCR1
M.11	GO:0015629	actin cytoskeleton	0.00302949	23	[AFAP1, AHNAK, CAPZA1, CASK, CLIC4, CTNNA1, EHBP1, EPB41L2, IQGAP1, LIMA1, MACF1, PKD2, PLEKHH2, RAB22A, SNX9, STK17B, STK38L, SWAP70, TMOD2, TMOD3, TWF1, UTRN, WASF2]	IQGAP1, PKD2, WASF2
M.11	GO:0045666	positive regulation of neuron differentiation	0.00321012	18	[BMP6, CREB3L2, CXCL12, ECT2, ENC1, EPHA4, FMR1, FZD4, IQGAP1, KDM4C, MACF1, MAGI2, NTN1, PTEN, SEMA5A, TCF7L2, TWF1, ZEB2]	IQGAP1	CREB3L2, TCF7L2, ZEB2
M.11	GO:0051960	regulation of nervous system development	0.00788967	30	[ADGRA2, APLP2, APPL2, BMP6, CREB3L2, CTNNA1, CXCL12, DENND5A, ECT2, ENC1, EPHA4, FMR1, FZD4, GPR173, IL1RAP, IQGAP1, KDM4C, MACF1, MAGI2, NTN1, PTEN, PTPN9, PTPRG, SEMA5A, TCF7L2, TRAK2, TULP3, TWF1, ZEB2, ZSWIM6]	IQGAP1	CREB3L2, TCF7L2, ZEB2
M.11	GO:0034763	negative regulation of transmembrane transport	0.00870257	8	[APLP2, APPL2, FMR1, GEM, PKD2, PTEN, SESTD1, SLC30A1]	PKD2, SESTD1
M.11	GO:0030334	regulation of cell migration	0.00875402	30	[ADGRA2, AJUBA, APLP2, APPL2, ARPIN, CLIC4, CXCL12, DOCK8, ENC1, GJA1, GPR173, IL1R1, IL33, IQGAP1, MACF1, MAGI2, MEAK7, MOSPD2, NTN1, PLPP3, PPM1F, PTEN, PTPRG, SEMA5A, SMURF2, SNAI2, SPRED1, SWAP70, TGFBR2, ZSWIM6]	IL1R1, IL33, IQGAP1, TGFBR2	SNAI2
M.11	GO:0009100	glycoprotein metabolic process	0.00899645	17	[CHST15, DPY19L1, DSE, FUT8, GALNT12, GALNT15, GALNT7, GLCE, MAGT1, MAN1A1, PGM3, POGLUT1, SOAT1, TCF7L2, TMEM165, TRAK2, XYLT1]	MAN1A1	TCF7L2
M.11	GO:0060986	endocrine hormone secretion	0.00903496	5	[AGTR1, BMP6, FZD4, GJA1, RAB8B]
M.11	GO:0072511	divalent inorganic cation transport	0.00908255	18	[AHNAK, CALCRL, CASK, CXCL12, FMR1, GEM, GJA1, ITPR1, MAGT1, NIPAL2, PKD2, SESTD1, SLC30A1, SLC30A7, SLC39A10, SLC39A9, TMEM165, TRPC1]	PKD2, SESTD1
M.11	GO:0051051	negative regulation of transport	0.00925736	18	[APLP2, APPL2, ARFIP1, CD47, FMR1, GEM, GJA1, IL33, INSIG1, PKD2, PLA2R1, PPM1F, PTEN, RAP1B, SESTD1, SLC30A1, SNX33, VPS4B]	IL33, PKD2, PLA2R1, SESTD1
M.11	GO:0007162	negative regulation of cell adhesion	0.00956296	13	[BMP6, CASK, CXCL12, ENC1, FZD4, PDCD1LG2, PELI1, PPM1F, PTEN, SEMA5A, SNAI2, SWAP70, TWSG1]		SNAI2
M.11	GO:0050678	regulation of epithelial cell proliferation	0.00981826	15	[AGTR1, BMP6, CASK, CD109, CXCL12, CYP7B1, GJA1, IFT57, IGF2, PGR, PTEN, SEMA5A, SNAI2, TCF7L2, TGFBR3]		PGR, SNAI2, TCF7L2
M.11	GO:0098857	membrane microdomain	0.00985821	15	[ADD3, AHNAK, BCL10, BIRC3, CBLB, CTNNA1, GJA1, GNAI1, IQGAP1, PLPP3, PLSCR1, PPT1, SMURF2, SPRED1, TGFBR2]	ADD3, IQGAP1, TGFBR2	PLSCR1
M.11	GO:0030659	cytoplasmic vesicle membrane	0.0105635	25	[APLP2, APPL2, CD109, CD47, CLIC4, CMTM6, DMXL2, FZD4, IQGAP1, ITPR1, LHFPL2, MAGT1, MOSPD2, PKD2, RAB22A, RAB8B, RAP1B, SEC24D, SNTB2, SNX33, SNX9, SPRED2, STX6, TBC1D5, TGOLN2]	IQGAP1, PKD2
M.11	GO:0035272	exocrine system development	0.0115171	5	[IGF2, IGSF3, NTN4, SNAI2, TWSG1]		SNAI2
M.11	GO:0006869	lipid transport	0.0120786	14	[ABCA9, AGTR1, BMP6, FZD4, LIMA1, PITPNM3, PLA2R1, PLSCR1, RFT1, SLC10A7, SOAT1, TTC39B, UGCG, VPS4B]	PLA2R1	PLSCR1
M.11	GO:0002009	morphogenesis of an epithelium	0.0128057	20	[AJUBA, BCL10, CLIC4, CYP7B1, EPHA4, FZD4, GJA1, IFT57, MAGI2, NTN1, NTN4, PGR, PKD2, PRICKLE2, PTEN, SMURF2, SNAI2, TGFBR2, TULP3, ZEB2]	PKD2, TGFBR2	PGR, SNAI2, ZEB2
M.11	GO:1904063	negative regulation of cation transmembrane transport	0.0128369	6	[FMR1, GEM, PKD2, PTEN, SESTD1, SLC30A1]	PKD2, SESTD1
M.11	KEGG:04520	Adherens junction	0.0129346	6	[CTNNA1, IQGAP1, SNAI2, TCF7L2, TGFBR2, WASF2]	IQGAP1, TGFBR2, WASF2	SNAI2, TCF7L2
M.11	GO:0060348	bone development	0.0132086	11	[BMP6, CYP26B1, GJA1, INSIG1, NAB1, PIP4K2A, SLC10A7, TGFBR2, TULP3, WASF2, XYLT1]	TGFBR2, WASF2
M.11	GO:0035091	phosphatidylinositol binding	0.0149169	12	[APLP2, APPL2, ARFIP1, CYTH3, IQGAP1, ITPR1, PLEKHA2, SESTD1, SNX33, SNX9, TULP3, TWF1]	IQGAP1, PLEKHA2, SESTD1
M.11	GO:0005912	adherens junction	0.0183473	9	[AJUBA, CTNNA1, CYTH3, DSC2, EPHA4, FRMD4B, HMCN1, PLPP3, TMOD3]	FRMD4B
M.11	GO:0005509	calcium ion binding	0.0203855	19	[CBLB, DSC2, EFHC1, FKBP14, GCA, GLCE, HEG1, HMCN1, IQGAP1, ITPR1, MACF1, MAN1A1, PCDH19, PCDHGA6, PITPNM3, PKD2, PLSCR1, RCAN3, SWAP70]	IQGAP1, MAN1A1, PKD2	PLSCR1
M.11	GO:0043434	response to peptide hormone	0.0213062	16	[AGTR1, APLP2, APPL2, CXCL12, GJA1, GNAI1, GPR173, IGF2, INSIG1, IQGAP1, LEPROT, MEAK7, PTEN, RAB8B, RAP1B, TGFBR3]	IQGAP1
M.11	GO:0004896	cytokine receptor activity	0.0222967	5	[CSF2RB, FZD4, IL1R1, IL1RAP, LEPROT]	IL1R1
M.11	GO:0015850	organic hydroxy compound transport	0.0224341	9	[AGTR1, BMP6, CXCL12, LIMA1, SLC10A7, SLC16A7, SOAT1, TTC39B, VPS4B]
M.11	GO:0032649	regulation of interferon-gamma production	0.0233854	5	[CD47, IL1R1, IL33, PDCD1LG2, TLR3]	IL1R1, IL33
M.11	GO:0043271	negative regulation of ion transport	0.0236664	7	[FMR1, GEM, PKD2, PLA2R1, PTEN, SESTD1, SLC30A1]	PKD2, PLA2R1, SESTD1
M.11	WP:2431	Spinal Cord Injury	0.0265457	6	[CD47, EPHA4, GJA1, IL1R1, NTN1, XYLT1]	IL1R1
M.11	GO:0030175	filopodium	0.0288268	6	[ADGRA2, CD302, EPHA4, FMR1, TWF1, UTRN]	CD302
M.11	GO:0045785	positive regulation of cell adhesion	0.0295348	14	[BCL10, CD47, CXCL12, CYTH3, DOCK8, ENC1, IGF2, IQGAP1, PDCD1LG2, PLEKHA2, PLPP3, PPM1F, TGFBR2, UTRN]	IQGAP1, PLEKHA2, TGFBR2
M.11	KEGG:04934	Cushing syndrome	0.0302303	7	[AGTR1, CREB3L2, FZD4, GNAI1, ITPR1, RAP1B, TCF7L2]		CREB3L2, TCF7L2
M.11	GO:0072073	kidney epithelium development	0.0302303	7	[EPHA4, IQGAP1, KANK2, MAGI2, PKD2, SOAT1, WWTR1]	IQGAP1, PKD2
M.11	GO:0048193	Golgi vesicle transport	0.0302579	14	[CAPZA1, CREB3L2, CYTH3, GOLGB1, INSIG1, MACF1, PLPP3, RAB8B, RP2, SEC22C, SEC24D, SLC10A7, STX6, YIPF5]		CREB3L2
M.11	KEGG:04060	Cytokine-cytokine receptor interaction	0.0378191	7	[BMP6, CSF2RB, CXCL12, IL1R1, IL1RAP, IL33, TGFBR2]	IL1R1, IL33, TGFBR2
M.11	GO:0009898	cytoplasmic side of plasma membrane	0.0400042	7	[CYTH3, GEM, GNAI1, GNB4, IQGAP1, PTEN, SNX9]	IQGAP1
M.11	GO:0001655	urogenital system development	0.0406943	12	[AGTR1, BMP6, CYP26B1, CYP7B1, EPHA4, IQGAP1, KANK2, MAGI2, PKD2, PTEN, SOAT1, WWTR1]	IQGAP1, PKD2
M.11	GO:0009615	response to virus	0.0416892	11	[BIRC3, BNIP3L, CXCL12, ELMOD2, FMR1, IL33, IRAK3, LYST, PLSCR1, TLR3, TRIM22]	IL33	PLSCR1
M.11	GO:1903037	regulation of leukocyte cell-cell adhesion	0.0487829	10	[BCL10, CD47, CXCL12, DOCK8, ENC1, IGF2, PDCD1LG2, PELI1, TGFBR2, TWSG1]	TGFBR2
M.13	GO:0005739	mitochondrion	3.72306e-45	122	[ACAA2, ACAD9, ACADVL, ACAT1, ACO1, ACOT2, ACSF2, ACSL1, ACSS2, AFG1L, AIFM1, AK2, ALAS1, ALDH4A1, ANK2, ATP5F1A, ATP5F1B, ATPAF1, CASP9, CAT, CCDC51, CHCHD7, CHDH, CKMT2, COQ6, COQ8A, COQ9, COX15, CPT2, CS, CYB5R1, DDX28, DECR1, DELE1, DGLUCY, DHTKD1, DLAT, DLD, DLST, DNAJC11, ECH1, ECHDC3, ECI2, ELAC2, ETFA, ETFDH, FAM210B, FH, GARS1, GATB, GATD3A, GCDH, GHITM, GOT2, GPT2, GRPEL2, GSDMC, GSTK1,…	AIFM1, ATP5F1A, ATP5F1B, CKMT2, COQ9, DLD, DLST, FH, GHITM, HADHA, HADHB, IMMT, MFN2, NDUFS2, PDHA1, PDHB, TRAP1, UQCRC2	MTERF3
M.13	GO:0019752	carboxylic acid metabolic process	9.99885e-20	66	[ACAA2, ACAD9, ACADVL, ACAT1, ACO1, ACOT1, ACOT2, ACSF2, ACSL1, ACSS2, ALDH4A1, ASPA, CKMT2, CPT2, CS, DECR1, DGLUCY, DHTKD1, DLAT, DLD, DLST, ECH1, ECHDC1, ECHDC3, ECI2, EHHADH, ESRRB, ETFA, ETFDH, FAH, FH, GARS1, GATB, GCDH, GOT1, GOT2, GPT2, HACL1, HADH, HADHA, HADHB, HARS2, HIBCH, HYAL1, IDH3B, IVD, MCEE, MDH1, MLYCD, NOS2, OGDH, OXSM, PCCA, PDHA1, PDHB, PDK4, PEX7, PHYH, PRODH, PTGR2, RARS1,…	CKMT2, DLD, DLST, FH, GOT1, HADHA, HADHB, MDH1, PDHA1, PDHB	ESRRB
M.13	GO:0046395	carboxylic acid catabolic process	1.08131e-18	35	[ACAA2, ACADVL, ACAT1, ALDH4A1, ASPA, CPT2, DECR1, DLD, DLST, ECH1, ECHDC1, ECI2, EHHADH, ETFA, ETFDH, FAH, GCDH, GOT1, GOT2, GPT2, HACL1, HADH, HADHA, HADHB, HIBCH, HYAL1, IVD, MCEE, MLYCD, NOS2, OGDH, PCCA, PEX7, PHYH, PRODH]	DLD, DLST, GOT1, HADHA, HADHB
M.13	R-HSA:1430728	Metabolism	1.93389e-18	91	[ACAA2, ACAD9, ACADVL, ACAT1, ACOT1, ACOT2, ACSF2, ACSL1, ACSS2, ADK, AGT, AK2, ALAS1, ALDH4A1, ASPA, ATP5F1A, ATP5F1B, CA3, CHDH, CKMT2, COQ6, COQ9, COX15, CPT2, CS, DECR1, DHCR7, DHTKD1, DLAT, DLD, DLST, ECI2, EHHADH, ETFA, ETFDH, FAH, FDPS, FH, GCDH, GOT1, GOT2, GPT2, GSTK1, HACL1, HADH, HADHA, HADHB, HIBCH, HYAL1, IDH3B, IDI2, IVD, MCEE, MDH1, MED20, MED9, MLYCD, MTARC2, NAXD, NDUFA10, NDUFAF…	ATP5F1A, ATP5F1B, CKMT2, COQ9, DLD, DLST, FH, GOT1, HADHA, HADHB, MDH1, NDUFS2, PDHA1, PDHB, TRAP1, UQCRC2	NFYC
M.13	GO:0005740	mitochondrial envelope	1.92207e-16	54	[ACAD9, ACADVL, ACSL1, AFG1L, AIFM1, AK2, ATP5F1A, ATP5F1B, CAT, CCDC51, CHCHD7, CHDH, CKMT2, COQ6, COQ8A, COQ9, COX15, CPT2, DNAJC11, ETFDH, FAM210B, GHITM, GOT2, GRPEL2, HADHA, HADHB, HSPD1, IMMT, IVD, MFN2, MICU1, MRPL19, MRPL44, MRPS22, MRPS27, MRPS31, MTARC2, MTERF3, MUL1, NDUFA10, NDUFAF1, NDUFS1, NDUFS2, OGDH, PPIF, PRODH, SCO1, SFXN1, SLC25A20, SLC25A34, TRAP1, TTC19, UQCC1, UQCRC2]	AIFM1, ATP5F1A, ATP5F1B, CKMT2, COQ9, GHITM, HADHA, HADHB, IMMT, MFN2, NDUFS2, TRAP1, UQCRC2	MTERF3
M.13	GO:0032787	monocarboxylic acid metabolic process	7.73316e-16	46	[ACAA2, ACAD9, ACADVL, ACAT1, ACOT1, ACOT2, ACSF2, ACSL1, ACSS2, ALDH4A1, CKMT2, CPT2, DECR1, DHTKD1, DLAT, DLD, ECH1, ECHDC1, ECHDC3, ECI2, EHHADH, ESRRB, ETFA, ETFDH, FAH, GCDH, GOT2, HACL1, HADH, HADHA, HADHB, IVD, MCEE, MLYCD, OGDH, OXSM, PCCA, PDHA1, PDHB, PDK4, PEX7, PHYH, PRODH, PTGR2, RGN, TECRL]	CKMT2, DLD, HADHA, HADHB, PDHA1, PDHB	ESRRB
M.13	GO:0045333	cellular respiration	5.70378e-15	27	[ACO1, AFG1L, CAT, COQ9, COX15, CS, DHTKD1, DLAT, DLD, DLST, ETFA, ETFDH, FH, IDH3B, MDH1, NDUFA10, NDUFAF1, NDUFS1, NDUFS2, NOS2, OGDH, PDHA1, PDHB, SIRT3, SUCLA2, TRAP1, UQCRC2]	COQ9, DLD, DLST, FH, MDH1, NDUFS2, PDHA1, PDHB, TRAP1, UQCRC2
M.13	GO:0006635	fatty acid beta-oxidation	2.63475e-14	18	[ACAA2, ACADVL, ACAT1, CPT2, DECR1, ECH1, ECHDC1, ECI2, EHHADH, ETFA, ETFDH, GCDH, HADH, HADHA, HADHB, IVD, MLYCD, PEX7]	HADHA, HADHB
M.13	R-HSA:1428517	The citric acid (TCA) cycle and respiratory electron transport	3.00774e-13	24	[ACAD9, ATP5F1A, ATP5F1B, CS, DLAT, DLD, DLST, ETFA, ETFDH, FH, IDH3B, NDUFA10, NDUFAF1, NDUFAF7, NDUFS1, NDUFS2, OGDH, PDHA1, PDHB, PDK4, SCO1, SUCLA2, TRAP1, UQCRC2]	ATP5F1A, ATP5F1B, DLD, DLST, FH, NDUFS2, PDHA1, PDHB, TRAP1, UQCRC2
M.13	WP:143	Fatty Acid Beta Oxidation	2.51894e-12	12	[ACADVL, ACAT1, ACSL1, ACSS2, CPT2, DECR1, DLD, GCDH, HADH, HADHA, HADHB, SLC25A20]	DLD, HADHA, HADHB
M.13	R-HSA:8978868	Fatty acid metabolism	3.23136e-12	21	[ACAA2, ACADVL, ACOT1, ACOT2, ACSF2, ACSL1, CPT2, DECR1, ECI2, EHHADH, HACL1, HADH, HADHA, HADHB, MCEE, MLYCD, PCCA, PHYH, PTGR2, SLC25A20, TECRL]	HADHA, HADHB
M.13	GO:0009108	coenzyme biosynthetic process	2.39572e-11	20	[ACAT1, ACSL1, ACSS2, COQ6, COQ8A, COQ9, DLAT, DLD, GCDH, MLYCD, NAXD, NFS1, NMRK2, PANK1, PDHA1, PDHB, PDK4, PDSS1, PDSS2, RGN]	COQ9, DLD, PDHA1, PDHB
M.13	WP:2453	TCA Cycle and Deficiency of Pyruvate Dehydrogenase complex (PDHc)	4.51167e-11	9	[ACO1, CS, DLAT, DLD, DLST, FH, MDH1, OGDH, PDHA1]	DLD, DLST, FH, MDH1, PDHA1
M.13	KEGG:00640	Propanoate metabolism	6.16311e-11	11	[ACAT1, ACSS2, DLD, ECHDC1, EHHADH, HADHA, HIBCH, MCEE, MLYCD, PCCA, SUCLA2]	DLD, HADHA
M.13	KEGG:00071	Fatty acid degradation	5.17535e-10	11	[ACAA2, ACADVL, ACAT1, ACSL1, CPT2, ECI2, EHHADH, GCDH, HADH, HADHA, HADHB]	HADHA, HADHB
M.13	R-HSA:9609507	Protein localization	1.13012e-09	19	[ACOT2, ATP5F1A, ATP5F1B, CAT, CHCHD7, CS, ECH1, ECI2, EHHADH, GRPEL2, GSTK1, HACL1, HSPD1, MLYCD, NOS2, PEX11B, PEX7, PHYH, PITRM1]	ATP5F1A, ATP5F1B
M.13	WP:368	Mitochondrial LC-Fatty Acid Beta-Oxidation	3.09352e-09	8	[ACADVL, ACSF2, ACSL1, CPT2, EHHADH, HADH, HADHA, SLC25A20]	HADHA
M.13	KEGG:00280	Valine, leucine and isoleucine degradation	4.20908e-09	11	[ACAA2, ACAT1, DLD, EHHADH, HADH, HADHA, HADHB, HIBCH, IVD, MCEE, PCCA]	DLD, HADHA, HADHB
M.13	KEGG:00310	Lysine degradation	6.16943e-07	10	[ACAT1, DHTKD1, DLD, DLST, EHHADH, GCDH, HADH, HADHA, SETMAR, SMYD3]	DLD, DLST, HADHA	SMYD3
M.13	KEGG:00620	Pyruvate metabolism	7.82298e-07	8	[ACAT1, ACSS2, DLAT, DLD, FH, MDH1, PDHA1, PDHB]	DLD, FH, MDH1, PDHA1, PDHB
M.13	GO:0009068	aspartate family amino acid catabolic process	8.25222e-07	7	[ASPA, DLD, DLST, GCDH, GOT1, GOT2, OGDH]	DLD, DLST, GOT1
M.13	R-HSA:556833	Metabolism of lipids	1.06576e-06	32	[ACAA2, ACADVL, ACAT1, ACOT1, ACOT2, ACSF2, ACSL1, AGT, ALAS1, CPT2, DECR1, DHCR7, ECI2, EHHADH, FDPS, HACL1, HADH, HADHA, HADHB, IDI2, MCEE, MED20, MED9, MLYCD, NFYC, PCCA, PEX11A, PHYH, PLIN2, PTGR2, SLC25A20, TECRL]	HADHA, HADHB	NFYC
M.13	GO:0140053	mitochondrial gene expression	3.25446e-06	15	[ELAC2, GARS1, GATB, MRPL19, MRPL44, MRPS22, MRPS27, MRPS31, MRRF, MTERF3, MTIF2, SUPV3L1, TARS2, TRUB2, UQCC1]		MTERF3
M.13	GO:0007005	mitochondrion organization	3.35785e-06	29	[ACAA2, ACAD9, AFG1L, AIFM1, ALAS1, ATP5F1A, ATP5F1B, ATPAF1, DNAJC11, GRPEL2, HSPD1, IMMT, MFN2, MUL1, NDUFA10, NDUFAF1, NDUFAF7, NDUFS1, NDUFS2, PITRM1, PPIF, PPP3CC, RHOU, SCO1, SIRT3, SUPV3L1, TTC19, UQCC1, UQCRC2]	AIFM1, ATP5F1A, ATP5F1B, IMMT, MFN2, NDUFS2, UQCRC2
M.13	GO:0043604	amide biosynthetic process	3.84072e-06	36	[ACAT1, ACO1, ACSL1, ACSS2, DLAT, DLD, EFL1, EIF2B3, EIF2B4, EIF2B5, GARS1, GATB, GCDH, GSPT2, HARS2, KLHL25, MLYCD, MRPL19, MRPL44, MRPS22, MRPS27, MRPS31, MRRF, MTFMT, MTIF2, OGFOD1, PDHA1, PDHB, PDK4, RARS1, SIRT3, ST6GALNAC3, TARS2, TRAP1, TRUB2, UQCC1]	DLD, PDHA1, PDHB, TRAP1
M.13	KEGG:00062	Fatty acid elongation	1.43433e-05	6	[ACAA2, ACOT1, ACOT2, HADH, HADHA, HADHB]	HADHA, HADHB
M.13	GO:0098800	inner mitochondrial membrane protein complex	4.07075e-05	12	[ATP5F1A, ATP5F1B, DNAJC11, GRPEL2, IMMT, MICU1, NDUFA10, NDUFAF1, NDUFS1, NDUFS2, PPIF, UQCRC2]	ATP5F1A, ATP5F1B, IMMT, NDUFS2, UQCRC2
M.13	GO:0009066	aspartate family amino acid metabolic process	8.47849e-05	7	[ASPA, DLD, DLST, GCDH, GOT1, GOT2, OGDH]	DLD, DLST, GOT1
M.13	GO:0098573	intrinsic component of mitochondrial membrane	0.000111647	9	[CCDC51, DNAJC11, ETFDH, IMMT, MFN2, MICU1, MUL1, SCO1, SFXN1]	IMMT, MFN2
M.13	GO:1990542	mitochondrial transmembrane transport	0.000317052	9	[AIFM1, ATP5F1A, ATP5F1B, CPT2, GRPEL2, HSPD1, MICU1, SFXN1, SLC25A20]	AIFM1, ATP5F1A, ATP5F1B
M.13	GO:0005758	mitochondrial intermembrane space	0.000334625	8	[AIFM1, AK2, CAT, CHCHD7, IMMT, MICU1, NDUFS1, TRAP1]	AIFM1, IMMT, TRAP1
M.13	R-HSA:1989781	PPARA activates gene expression	0.000612586	9	[ACSL1, AGT, ALAS1, CPT2, MED20, MED9, NFYC, PEX11A, PLIN2]		NFYC
M.13	GO:0046394	carboxylic acid biosynthetic process	0.0022234	14	[ACADVL, ACSS2, ASPA, GOT1, GOT2, GPT2, HYAL1, MLYCD, OXSM, PDK4, RGN, SUCLA2, TECRL, UPB1]	GOT1
M.13	GO:0001657	ureteric bud development	0.00268431	7	[AGT, CAT, FGF1, GARS1, GATD3A, HES1, RARB]		HES1, RARB
M.13	R-HSA:8949613	Cristae formation	0.00534827	4	[ATP5F1A, ATP5F1B, DNAJC11, IMMT]	ATP5F1A, ATP5F1B, IMMT
M.13	GO:0090181	regulation of cholesterol metabolic process	0.00688596	5	[ACADVL, DHCR7, FDPS, FGF1, NFYC]		NFYC
M.13	GO:0043531	ADP binding	0.0078952	4	[ATP5F1A, COQ8A, PPP5C, RUVBL1]	ATP5F1A
M.13	GO:0019216	regulation of lipid metabolic process	0.00812186	15	[ACADVL, ACSL1, AGT, ALAS1, CPT2, DHCR7, FDPS, FGF1, MLYCD, NFYC, PDK4, PEX11A, PLIN2, RGN, SIRT3]		NFYC
M.13	GO:0034703	cation channel complex	0.00902427	8	[CACNA2D3, CCDC51, KCND3, KCNMA1, MICU1, PKD1L1, RYR3, SCN2B]
M.13	GO:0070585	protein localization to mitochondrion	0.0109787	8	[AIFM1, GRPEL2, HSPD1, MFN2, PITRM1, PPP3CC, RHOU, UQCRC2]	AIFM1, MFN2, UQCRC2
M.13	GO:0031968	organelle outer membrane	0.0112824	10	[ACSL1, DHCR7, DNAJC11, FAM210B, HADHB, IMMT, MFN2, MTARC2, MTERF3, MUL1]	HADHB, IMMT, MFN2	MTERF3
M.13	GO:0008170	N-methyltransferase activity	0.0153182	6	[EEF1AKMT1, METTL15, METTL21EP, NDUFAF7, SETMAR, SMYD3]		SMYD3
M.13	GO:0042542	response to hydrogen peroxide	0.0210306	7	[AIFM1, CAT, HSPD1, MAP3K5, PPIF, PPP5C, TRAP1]	AIFM1, TRAP1
M.13	GO:0019829	ATPase-coupled cation transmembrane transporter activity	0.0277197	4	[ATP5F1B, ATP6V1B2, PPIF, RGN]	ATP5F1B
M.13	GO:0014013	regulation of gliogenesis	0.0304854	5	[ASPA, GATD3A, HES1, NF2, PRKCH]		HES1
M.13	GO:0045682	regulation of epidermis development	0.0455821	4	[GATD3A, HES1, MACROH2A2, PRKCH]		HES1
M.14	GO:0042581	specific granule	0.00334839	7	[ACAA1, CD36, ITGAL, LRRC7, LTF, NIT2, VAMP8]	ACAA1, CD36	LTF
M.14	GO:0009952	anterior/posterior pattern specification	0.00361798	7	[BTG2, HOXA11, HOXA2, HOXA5, NOG, NOL3, TBX3]	HOXA11	HOXA11, HOXA2, HOXA5, TBX3
M.14	GO:1902882	regulation of response to oxidative stress	0.00370532	5	[ACOX2, CD36, MACROH2A1, NOL3, PYCR1]	CD36
M.14	WP:3942	PPAR signaling pathway	0.00428389	4	[ACAA1, ACOX2, CD36, LPL]	ACAA1, CD36
M.14	KEGG:03320	PPAR signaling pathway	0.00470394	4	[ACAA1, ACOX2, CD36, LPL]	ACAA1, CD36
M.14	R-HSA:8978868	Fatty acid metabolism	0.00496646	6	[ACAA1, ACOT9, ACOX2, EPHX2, HSD17B8, PTGR1]	ACAA1, HSD17B8
M.14	GO:0016616	oxidoreductase activity, acting on the CH-OH group of donors, NAD or NADP as acceptor	0.00510241	5	[DHRS11, GMPR2, HSD17B8, PTGR1, SDSL]	HSD17B8
M.14	GO:0045638	negative regulation of myeloid cell differentiation	0.00552364	5	[HOXA5, LTF, NFKBIA, PTPN2, ZBTB46]		HOXA5, LTF, ZBTB46
M.14	KEGG:04650	Natural killer cell mediated cytotoxicity	0.00844708	4	[CD247, ITGAL, PIK3R3, PRF1]
M.14	GO:0042742	defense response to bacterium	0.00882298	5	[CD36, FGR, GNLY, LTF, NOD1]	CD36, GNLY	LTF
M.15	GO:0030049	muscle filament sliding	6.46745e-08	8	[ACTA1, DES, MYL1, TNNC2, TNNI2, TNNT3, TPM1, TPM2]	ACTA1, TNNI2, TPM2
M.15	GO:0033275	actin-myosin filament sliding	6.46745e-08	8	[ACTA1, DES, MYL1, TNNC2, TNNI2, TNNT3, TPM1, TPM2]	ACTA1, TNNI2, TPM2
M.15	R-HSA:390522	Striated Muscle Contraction	7.45424e-08	8	[ACTA1, DES, MYL1, TNNC2, TNNI2, TNNT3, TPM1, TPM2]	ACTA1, TNNI2, TPM2
M.15	GO:0043292	contractile fiber	1.84772e-07	15	[ACTA1, ARF1, CAPZB, DES, FHL2, FHL3, MYL1, MYLPF, PDLIM7, TNNC2, TNNI2, TNNT3, TPM1, TPM2, TRIM54]	ACTA1, ARF1, FHL3, TNNI2, TPM2
M.15	GO:0005865	striated muscle thin filament	1.17388e-06	6	[ACTA1, TNNC2, TNNI2, TNNT3, TPM1, TPM2]	ACTA1, TNNI2, TPM2
M.15	GO:0036379	myofilament	1.32416e-06	6	[ACTA1, TNNC2, TNNI2, TNNT3, TPM1, TPM2]	ACTA1, TNNI2, TPM2
M.15	KEGG:00010	Glycolysis / Gluconeogenesis	0.000606257	5	[ENO3, GAPDH, PGAM2, PGM1, PKM]	ENO3, GAPDH, PGAM2
M.15	R-HSA:71387	Metabolism of carbohydrates	0.000628306	10	[B4GALT3, ENO3, GAPDH, PGAM2, PGM1, PHKG1, PKM, PYGM, SEC13, SLC37A4]	ENO3, GAPDH, PGAM2, PYGM
M.15	KEGG:03013	RNA transport	0.00133395	7	[EIF1, EIF3F, EIF4EBP1, PABPC4, RPP40, SEC13, UBE2I]	EIF3F
M.15	GO:0030315	T-tubule	0.00197325	4	[CACNG1, RTN2, SCN1B, STAC3]	RTN2, SCN1B
M.15	R-HSA:6807878	COPI-mediated anterograde transport	0.0134745	4	[ARF1, CAPZB, COG4, COPZ1]	ARF1
M.16	GO:0001525	angiogenesis	2.35596e-11	33	[ADAM8, ANGPTL4, AQP1, CARD10, CX3CL1, DLL4, EFNA1, EGFL7, EPHA2, EPHB4, FLT4, FMNL3, FUT1, GATA2, GPR4, HOXB3, ID1, KCNA5, KLF2, MMRN2, NOS3, NOTCH1, NOTCH4, NRARP, PGF, PLCG1, PLXND1, RAPGEF3, RASIP1, RHOB, ROBO4, SOX17, TIE1]	EGFL7, NOTCH4, RAPGEF3, ROBO4, TIE1	GATA2, HOXB3, KLF2, SOX17
M.16	GO:0035239	tube morphogenesis	2.64093e-09	38	[ADAM8, ANGPTL4, AQP1, ATOH8, CARD10, CX3CL1, DLL4, EFNA1, EGFL7, EPHA2, EPHB4, FLT4, FMNL3, FUT1, GATA2, GJC1, GJD3, GPR4, HOXB3, ID1, KCNA5, KLF2, MMRN2, NOS3, NOTCH1, NOTCH4, NRARP, PGF, PLCG1, PLXND1, RAPGEF3, RASIP1, RHOB, ROBO4, SOX17, STOX1, TBX21, TIE1]	EGFL7, NOTCH4, RAPGEF3, ROBO4, TIE1	ATOH8, GATA2, HOXB3, KLF2, SOX17, TBX21
M.16	GO:0072359	circulatory system development	6.8966e-09	43	[ADAM8, ANGPTL4, AQP1, ARHGEF15, CARD10, CCM2L, CX3CL1, DLL4, EFNA1, EGFL7, EPHA2, EPHB4, EPOR, FLT4, FMNL3, FUT1, GATA2, GJA4, GJC1, GJD3, GPR4, HOXB3, ID1, ID3, KCNA5, KLF2, MMRN2, NOS3, NOTCH1, NOTCH4, NRARP, PDE2A, PGF, PLCG1, PLXND1, RAPGEF3, RASIP1, RHOB, ROBO4, SIK1B, SOX17, TBX21, TIE1]	ARHGEF15, EGFL7, NOTCH4, RAPGEF3, ROBO4, TIE1	GATA2, HOXB3, KLF2, SOX17, TBX21
M.16	GO:0043542	endothelial cell migration	1.32987e-06	16	[ATOH8, CARD10, DLL4, EFNA1, EPHA2, EPHB4, FLT4, FUT1, GATA2, ID1, MMRN2, NOS3, NOTCH1, PLCG1, PLXND1, RHOB]		ATOH8, GATA2
M.16	GO:0005887	integral component of plasma membrane	1.42626e-06	38	[ADAM8, ADCY4, ADRA2B, AQP1, CD82, CHRNE, CNTFR, EFNB1, EPHA2, EPHB4, EPOR, FLT4, FUT1, GJA4, GJD3, GPR4, GRIN2C, ICAM2, IL2RB, KCNA5, KCNQ4, NOTCH4, PCDH1, PCDH12, PCDHB12, PLXND1, PTH1R, SEMA3F, SEMA3G, SHANK3, SLC2A6, SLCO4A1, SYT7, TIE1, TMC6, TNFRSF4, TPO, TSPAN32]	NOTCH4, PCDH12, SEMA3G, TIE1
M.16	GO:0002040	sprouting angiogenesis	1.84684e-06	12	[CARD10, DLL4, EPHA2, EPHB4, FLT4, FUT1, GATA2, KLF2, MMRN2, NOTCH1, NRARP, PGF]		GATA2, KLF2
M.16	GO:0001667	ameboidal-type cell migration	3.19607e-06	21	[ATOH8, CARD10, DLL4, EFNA1, EFNB1, EPHA2, EPHB4, FLT4, FUT1, GATA2, HYAL2, ID1, MMRN2, NOS3, NOTCH1, PLCG1, PLXND1, RHOB, SEMA3F, SEMA3G, SOX17]	SEMA3G	ATOH8, GATA2, SOX17
M.16	GO:0043534	blood vessel endothelial cell migration	1.00742e-05	11	[CARD10, DLL4, EFNA1, EPHA2, EPHB4, GATA2, ID1, MMRN2, NOS3, NOTCH1, PLCG1]		GATA2
M.16	R-HSA:1247673	Erythrocytes take up oxygen and release carbon dioxide	1.08868e-05	4	[AQP1, HBA1, HBA2, HBB]
M.16	GO:0007219	Notch signaling pathway	1.29736e-05	13	[AAK1, CHAC1, DLL4, DTX3, EGFL7, GATA2, KCNA5, NEURL1B, NOS3, NOTCH1, NOTCH4, NRARP, PLXND1]	DTX3, EGFL7, NOTCH4	GATA2
M.16	GO:0043535	regulation of blood vessel endothelial cell migration	5.43352e-05	9	[CARD10, DLL4, EFNA1, EPHA2, GATA2, MMRN2, NOS3, NOTCH1, PLCG1]		GATA2
M.16	GO:0008593	regulation of Notch signaling pathway	9.31088e-05	9	[AAK1, CHAC1, DLL4, EGFL7, GATA2, NOS3, NOTCH1, NOTCH4, NRARP]	EGFL7, NOTCH4	GATA2
M.16	GO:0001936	regulation of endothelial cell proliferation	0.000127255	10	[ATOH8, DLL4, EGFL7, FLT4, FUT1, GATA2, NRARP, PGF, PLCG1, TINAGL1]	EGFL7, TINAGL1	ATOH8, GATA2
M.16	GO:0001570	vasculogenesis	0.000147522	8	[EGFL7, EPHA2, GJC1, GJD3, NOTCH1, RASIP1, SOX17, TIE1]	EGFL7, TIE1	SOX17
M.16	GO:0007264	small GTPase mediated signal transduction	0.000349324	21	[ARAP3, ARHGEF16, CCDC88C, CDC42EP4, DOCK6, EPOR, FGD3, GPR4, GRAP, IFT27, IQSEC3, MCF2L, NOTCH1, RAB26, RAPGEF3, RASAL3, RASGRP2, RASIP1, RHOB, SH2D3C, SIPA1L3]	ARAP3, DOCK6, RAPGEF3, RASGRP2, SH2D3C
M.16	GO:0002064	epithelial cell development	0.000449583	11	[ADAMTSL4, CCDC88C, EPHA2, GPR4, ID1, NOTCH1, NOTCH4, PDE2A, RAPGEF3, ROBO4, SIPA1L3]	NOTCH4, RAPGEF3, ROBO4
M.16	KEGG:04015	Rap1 signaling pathway	0.000455384	11	[ADCY4, ARAP3, EFNA1, EPHA2, FLT4, ID1, PGF, PLCG1, RAPGEF3, RASGRP2, SIPA1L3]	ARAP3, RAPGEF3, RASGRP2
M.16	GO:0005921	gap junction	0.000848983	4	[GJA4, GJC1, GJD3, SPECC1L]
M.16	GO:0006525	arginine metabolic process	0.000848983	4	[ASL, ASS1, NOS3, TINAGL1]	TINAGL1
M.16	GO:0005509	calcium ion binding	0.000896289	19	[ADAM8, CGREF1, CRACR2B, DLL4, EGFL7, GAS6, NOTCH1, NOTCH4, PCDH1, PCDH12, PCDHB12, PITPNM1, PITPNM2, PLCG1, RASGRP2, S100A9, SYT7, TPO, VWCE]	CRACR2B, EGFL7, NOTCH4, PCDH12, RASGRP2
M.16	GO:0015711	organic anion transport	0.00093563	16	[ABCG1, ACE, AQP1, HBA1, HBB, NFKBIE, PITPNC1, PITPNM1, PITPNM2, S100A9, SFXN2, SLC2A6, SLC4A11, SLCO4A1, SYCP2, TINAGL1]	TINAGL1
M.16	GO:0050678	regulation of epithelial cell proliferation	0.000943155	14	[ATOH8, DLL4, EGFL7, FLT4, FUT1, GATA2, ID1, LIMS2, NOTCH1, NRARP, PGF, PLCG1, STOX1, TINAGL1]	EGFL7, TINAGL1	ATOH8, GATA2
M.16	GO:0060216	definitive hemopoiesis	0.000955801	4	[ADAR, GATA2, HOXB3, HOXB4]		GATA2, HOXB3, HOXB4
M.16	GO:0002043	blood vessel endothelial cell proliferation involved in sprouting angiogenesis	0.0010488	4	[DLL4, EPHA2, GATA2, NRARP]		GATA2
M.16	GO:0090049	regulation of cell migration involved in sprouting angiogenesis	0.00106739	5	[CARD10, DLL4, GATA2, MMRN2, NOTCH1]		GATA2
M.16	GO:0045216	cell-cell junction organization	0.00107891	10	[ACE, CLDN9, EPHA2, ESAM, GJA4, GJC1, GJD3, GRHL1, LIMS2, PKP1]	ESAM	GRHL1
M.16	GO:0050679	positive regulation of epithelial cell proliferation	0.00126459	10	[EGFL7, FLT4, GATA2, ID1, NOTCH1, NRARP, PGF, PLCG1, STOX1, TINAGL1]	EGFL7, TINAGL1	GATA2
M.16	GO:0001569	branching involved in blood vessel morphogenesis	0.00214376	4	[DLL4, NOTCH4, NRARP, PLXND1]	NOTCH4
M.16	GO:0071549	cellular response to dexamethasone stimulus	0.0027482	4	[AQP1, ASS1, DDIT4, TINAGL1]	TINAGL1
M.16	GO:0002244	hematopoietic progenitor cell differentiation	0.00280575	9	[ACE, ADAR, GATA2, HOXB3, HOXB4, HYAL2, KCP, NOTCH1, SIPA1L3]		GATA2, HOXB3, HOXB4
M.16	GO:0048562	embryonic organ morphogenesis	0.002812	11	[EFNA1, EPHA2, GATA2, HOXB2, HOXB3, HOXB4, KCNQ4, NOTCH1, SOX17, STOX1, TBX21]		GATA2, HOXB2, HOXB3, HOXB4, SOX17, TBX21
M.16	GO:0019935	cyclic-nucleotide-mediated signaling	0.00285529	8	[ADCY4, ADRA2B, AQP1, GPR4, PDE11A, PDE2A, PTH1R, RAPGEF3]	RAPGEF3
M.16	KEGG:04658	Th1 and Th2 cell differentiation	0.0029989	6	[DLL4, IL2RB, NFKBIE, NOTCH1, PLCG1, TBX21]		TBX21
M.16	GO:0032715	negative regulation of interleukin-6 production	0.00313302	4	[CX3CL1, GAS6, INPP5D, KLF2]		KLF2
M.16	GO:1990782	protein tyrosine kinase binding	0.00344215	6	[ARHGEF16, GAS6, HYAL2, PITPNM1, PITPNM2, PLCG1]
M.16	GO:0048568	embryonic organ development	0.00384274	14	[EFNA1, EPHA2, GATA2, HOXB2, HOXB3, HOXB4, ID3, KCNQ4, NOTCH1, PCDH12, SOX17, STOX1, TBX21, TPO]	PCDH12	GATA2, HOXB2, HOXB3, HOXB4, SOX17, TBX21
M.16	GO:0050708	regulation of protein secretion	0.00389267	14	[ABCG1, ADAM8, CX3CL1, DEFB124, FCN1, GAS6, HYAL2, KCNA5, MAP4K2, RAPGEF3, RHBDF2, S100A9, SYT7, TNFRSF4]	RAPGEF3
M.16	GO:0001885	endothelial cell development	0.00393308	5	[ID1, NOTCH4, PDE2A, RAPGEF3, ROBO4]	NOTCH4, RAPGEF3, ROBO4
M.16	GO:0050900	leukocyte migration	0.0045917	13	[ADAM8, CX3CL1, DEFB124, ESAM, GAS6, INPP5D, PGF, PLCG1, S100A9, SPNS2, TBX21, TNFRSF10A, TNFRSF10B]	ESAM	TBX21
M.16	GO:0001818	negative regulation of cytokine production	0.00526408	10	[CX3CL1, EPHA2, GAS6, INPP5D, KLF2, NLRC5, SIGIRR, TBX21, TINAGL1, TNFRSF4]	NLRC5, TINAGL1	KLF2, TBX21
M.16	GO:0003170	heart valve development	0.00530773	5	[DLL4, EFNA1, NOS3, NOTCH1, PDE2A]
M.16	GO:0007596	blood coagulation	0.00556147	11	[ADRA2B, DOCK6, ENTPD2, GAS6, GATA2, HBB, HDAC1, NOS3, PEAR1, RHBDF2, TSPAN32]	DOCK6	GATA2
M.16	WP:4222	Phosphodiesterases in neuronal function	0.00566383	4	[ADCY4, GRIN2C, PDE11A, PDE2A]
M.16	GO:0051056	regulation of small GTPase mediated signal transduction	0.00592402	12	[ARAP3, ARHGEF16, EPOR, FGD3, GPR4, IQSEC3, MCF2L, NOTCH1, RASAL3, RASIP1, RHOB, SIPA1L3]	ARAP3
M.16	R-HSA:202733	Cell surface interactions at the vascular wall	0.00667854	6	[ESAM, GAS6, INPP5D, PLCG1, TNFRSF10A, TNFRSF10B]	ESAM
M.16	GO:0048469	cell maturation	0.00697595	7	[CX3CL1, GATA2, HID1, KLF2, PCSK4, PTH1R, SCARF1]		GATA2, KLF2
M.16	GO:2000177	regulation of neural precursor cell proliferation	0.00712288	5	[CX3CL1, DLL4, GATA2, LIMS2, NOTCH1]		GATA2
M.16	R-HSA:194840	Rho GTPase cycle	0.00780999	7	[ARAP3, ARHGAP27, ARHGEF15, ARHGEF16, FGD3, MCF2L, RHOB]	ARAP3, ARHGAP27, ARHGEF15
M.16	GO:0046718	viral entry into host cell	0.0081805	6	[CLDN9, EPHA2, FCN1, GAS6, HYAL2, TNFRSF4]
M.16	GO:0002695	negative regulation of leukocyte activation	0.00834471	7	[CX3CL1, INPP5D, NRARP, TBC1D10C, TBX21, TINAGL1, TSPAN32]	TINAGL1	TBX21
M.16	GO:0072577	endothelial cell apoptotic process	0.00846207	4	[ANGPTL4, GAS6, GATA2, PLCG1]		GATA2
M.16	GO:0051271	negative regulation of cellular component movement	0.00846924	11	[CARD10, CX3CL1, DLL4, HYAL2, MMRN2, NOTCH1, RHOB, S100A9, SEMA3F, SEMA3G, TIE1]	SEMA3G, TIE1
M.16	GO:0042542	response to hydrogen peroxide	0.00875062	7	[AQP1, HBA1, HBB, KCNA5, KLF2, RHOB, TINAGL1]	TINAGL1	KLF2
M.16	R-HSA:112316	Neuronal System	0.00983613	10	[ADCY4, AP2M1, CHRNE, GJC1, GRIN2C, KCNA5, KCNQ4, KIF17, SYN2, SYT7]
M.16	GO:0033613	activating transcription factor binding	0.011197	5	[ATOH8, CIITA, HDAC1, HOXB4, TBX21]		ATOH8, HOXB4, TBX21
M.16	GO:0044409	entry into host	0.0121201	6	[CLDN9, EPHA2, FCN1, GAS6, HYAL2, TNFRSF4]
M.16	GO:0042136	neurotransmitter biosynthetic process	0.012186	5	[ASS1, HBB, KLF2, NOS3, SH2D3C]	SH2D3C	KLF2
M.16	GO:0060326	cell chemotaxis	0.0131006	9	[ADAM8, ARHGEF16, CX3CL1, DEFB124, EPHA2, GAS6, NOTCH1, PGF, S100A9]
M.16	GO:0010771	negative regulation of cell morphogenesis involved in differentiation	0.0133625	5	[EFNA1, GORASP1, ID1, SEMA3F, SEMA3G]	SEMA3G
M.16	GO:0050891	multicellular organismal water homeostasis	0.0134708	4	[ADCY4, AQP1, GRHL1, HYAL2]		GRHL1
M.16	GO:0007162	negative regulation of cell adhesion	0.0146895	9	[ASS1, CCM2L, CX3CL1, NOTCH1, NOTCH4, NRARP, PLXND1, TBX21, TINAGL1]	NOTCH4, TINAGL1	TBX21
M.16	GO:1990748	cellular detoxification	0.0206103	5	[HBA1, HBB, NOS3, S100A9, TPO]
M.16	GO:0005902	microvillus	0.0215524	4	[HYAL2, ICAM2, RAPGEF3, SYTL1]	RAPGEF3
M.16	GO:0007156	homophilic cell adhesion via plasma membrane adhesion molecules	0.0218292	5	[ESAM, PCDH1, PCDH12, PCDHB12, ROBO4]	ESAM, PCDH12, ROBO4
M.16	GO:0098802	plasma membrane signaling receptor complex	0.0268471	6	[CHRNE, CNTFR, GRIN2C, IL2RB, SHANK3, TSPAN32]
M.16	WP:2877	Vitamin D Receptor Pathway	0.0290564	5	[ABCA11P, CRACR2B, EPHB4, ID1, S100A9]	CRACR2B
M.16	GO:0051591	response to cAMP	0.0377552	4	[AQP1, ASS1, PDE2A, RAPGEF3]	RAPGEF3
M.16	GO:0034341	response to interferon-gamma	0.0379773	6	[ASS1, CDC42EP4, CIITA, CX3CL1, NLRC5, TINAGL1]	NLRC5, TINAGL1
M.16	GO:0045995	regulation of embryonic development	0.0411065	5	[GATA2, NOTCH1, NRARP, SOX17, STOX1]		GATA2, SOX17
M.17	R-HSA:3214841	PKMTs methylate histone lysines	0.00158895	6	[DOT1L, KMT2B, NFKB1, RELA, SETD1A, SETD1B]	SETD1A	DOT1L, KMT2B, NFKB1, RELA
M.17	R-HSA:3247509	Chromatin modifying enzymes	0.00369754	11	[ARID1A, DOT1L, HCFC1, KDM6B, KMT2B, NCOR2, NFKB1, RELA, SETD1A, SETD1B, SMARCA4]	HCFC1, SETD1A	DOT1L, KMT2B, NFKB1, RELA
M.17	GO:0016197	endosomal transport	0.0056334	10	[AP5B1, DENND1A, MICALL1, PHETA1, PTPN23, RAB11FIP3, SCRIB, SNX8, TBC1D10B, VPS37C]	PTPN23, SCRIB, TBC1D10B
M.17	GO:0001217	DNA-binding transcription repressor activity	0.00570465	9	[CC2D1A, CEBPB, MAFK, NACC2, NFKB1, PPARD, RELA, SP2, ZBTB45]		CC2D1A, CEBPB, MAFK, NACC2, NFKB1, PPARD, RELA, SP2, ZBTB45
M.17	R-HSA:400253	Circadian Clock	0.00627355	5	[CRTC1, CRTC2, CSNK1D, RAI1, SREBF1]		SREBF1
M.17	R-HSA:381340	Transcriptional regulation of white adipocyte differentiation	0.0106803	5	[CEBPB, NCOR2, NFKB1, RELA, SREBF1]		CEBPB, NFKB1, RELA, SREBF1
M.17	GO:0046888	negative regulation of hormone secretion	0.0111597	4	[MIDN, RAB11FIP3, RAB11FIP5, SREBF1]		SREBF1
M.17	GO:0034332	adherens junction organization	0.0142644	4	[CDH15, FZR1, PTPN23, ZNF703]	PTPN23	ZNF703
M.17	GO:0001841	neural tube formation	0.0169838	5	[ARID1A, RGMA, SCRIB, STK24, TSC2]	SCRIB
M.17	WP:4674	Head and Neck Squamous Cell Carcinoma	0.0204558	4	[ERBB2, NFKB1, RELA, TSC2]		NFKB1, RELA
M.17	GO:0044344	cellular response to fibroblast growth factor stimulus	0.0219532	5	[FAM20C, GPC1, NR4A1, POLR2A, ZFP36]		NR4A1
M.17	GO:0006029	proteoglycan metabolic process	0.0220452	4	[CANT1, CHST12, GPC1, PPARD]		PPARD
M.17	GO:0031490	chromatin DNA binding	0.0244123	4	[KDM6B, RELA, SBNO2, SMARCA4]		RELA
M.17	KEGG:04211	Longevity regulating pathway	0.0258257	4	[NFKB1, RELA, TSC2, ULK1]	ULK1	NFKB1, RELA
M.17	GO:0007613	memory	0.0334914	4	[CEBPB, CIC, CRTC1, KMT2B]		CEBPB, CIC, KMT2B
M.18	GO:0030049	muscle filament sliding	2.89002e-09	10	[ACTN2, MYH6, MYH7, MYL2, MYL6B, TNNC1, TNNI1, TNNI3, TNNT1, TPM3]	MYH6, MYH7, MYL2, TNNC1, TNNI1, TNNT1, TPM3
M.18	GO:0043292	contractile fiber	5.26288e-09	20	[ACTN2, ANKRD2, CASQ2, FHOD3, MYH6, MYH7, MYH7B, MYL12A, MYL2, MYL6B, MYOM3, MYOZ2, PDLIM1, SMPX, TNNC1, TNNI1, TNNI3, TNNT1, TPM3, TWF2]	ANKRD2, CASQ2, MYH6, MYH7, MYH7B, MYL12A, MYL2, MYOM3, TNNC1, TNNI1, TNNT1, TPM3, TWF2
M.18	GO:0050848	regulation of calcium-mediated signaling	5.62697e-05	8	[CAMK2D, CASQ2, CHP1, HOMER2, MYOZ2, P2RX5, RCAN2, SLC9A1]	CASQ2
M.18	GO:0006942	regulation of striated muscle contraction	5.94231e-05	8	[CAMK2D, CASQ2, MYH7, MYL2, SLC9A1, STRIT1, TNNI1, TNNI3]	CASQ2, MYH7, MYL2, TNNI1
M.18	GO:0007605	sensory perception of sound	0.000728803	7	[ALDH7A1, HOMER2, MYH7B, OTOF, PJVK, RIPOR2, TECTA]	MYH7B
M.18	GO:0005604	basement membrane	0.00833499	5	[COLQ, FGF9, LAD1, SMOC1, TNNC1]	TNNC1
M.18	GO:1902936	phosphatidylinositol bisphosphate binding	0.00967563	5	[ACTN2, PFN2, PHLDA3, SLC9A1, TWF2]	TWF2
M.18	GO:0015276	ligand-gated ion channel activity	0.0104677	6	[ACTN2, CAMK2D, CASQ2, CHRNB1, CNIH4, P2RX5]	CASQ2
M.18	GO:0072332	intrinsic apoptotic signaling pathway by p53 class mediator	0.0220313	4	[ANKRD2, PHLDA3, TAF9, ZNF385B]	ANKRD2	ZNF385B
M.18	GO:0005884	actin filament	0.0226223	5	[ACTN2, DPYSL3, PDLIM1, TPM3, TWF2]	TPM3, TWF2
M.21	GO:0035304	regulation of protein dephosphorylation	0.00230884	6	[PINK1, PPP1R16A, PPP2R1A, PTPA, SMPD1, SYMPK]	PPP1R16A, PPP2R1A
M.21	GO:0009063	cellular amino acid catabolic process	0.0040819	5	[BCAT2, GPT, LDHD, MPST, TST]	GPT, LDHD
M.21	GO:0072329	monocarboxylic acid catabolic process	0.00481247	5	[ACADS, AKT1, CRAT, DCXR, LDHD]	ACADS, CRAT, DCXR, LDHD
M.21	GO:0010507	negative regulation of autophagy	0.00538733	4	[AKT1, CPTP, PINK1, SIRT2]	CPTP
M.21	GO:0006094	gluconeogenesis	0.0075965	4	[GPI, GPT, PC, PDK2]	GPT, PDK2
M.24	GO:0014031	mesenchymal cell development	0.00760455	12	[ACVR1, CITED2, EDN3, ERBB4, HEY2, KBTBD8, PITX2, RET, SEMA3C, SEMA4D, SOX9, VPS72]		HEY2, PITX2, SOX9
M.24	GO:0014816	skeletal muscle satellite cell differentiation	0.0260602	4	[KLF5, MSTN, MYLK2, PAX7]		KLF5, PAX7
M.24	GO:0048762	mesenchymal cell differentiation	0.030083	17	[ACVR1, CITED2, EDN3, ERBB4, HEY2, KBTBD8, OLFM1, PDPN, PITX2, RET, SEMA3C, SEMA4D, SMAD7, SOX9, SPRY2, VPS72, WNT4]		HEY2, PITX2, SOX9
M.24	GO:0060384	innervation	0.0302165	5	[NPTX1, POU4F1, RET, SERPINE2, UNC13B]	SERPINE2	POU4F1
M.24	GO:0061041	regulation of wound healing	0.0311334	13	[AJAP1, DUSP10, FGF13, HBEGF, MYOD1, PDGFA, PDPN, PRKCA, SERPINE2, TNFAIP3, TSPAN8, UBASH3B, WNT4]	SERPINE2, TSPAN8	MYOD1
M.24	GO:0006165	nucleoside diphosphate phosphorylation	0.0311334	13	[ACTN3, BPGM, GPD1, HOOK3, LDHA, NDC1, NME9, PFKFB3, PGK1, PGM2L1, PRKAG3, PRXL2C, TIGAR]
M.24	GO:0007517	muscle organ development	0.0316796	26	[ACTN3, ARID5B, ASB2, ATF3, BCL9, CITED2, ERBB4, FGF13, FOXP2, FZD7, HBEGF, HDAC9, HEY2, KLF5, MRAS, MSTN, MYF5, MYLK2, MYOD1, PAK1, PAX7, PITX1, POU4F1, SMAD7, TLL2, ZFHX3]		ARID5B, ATF3, FOXP2, HEY2, KLF5, MYF5, MYOD1, PAX7, PITX1, POU4F1, ZFHX3
M.24	GO:0048668	collateral sprouting	0.0344713	5	[COBL, FGF13, IFRD1, NIN, SEMA4D]	COBL
M.24	WP:1423	Ganglio Sphingolipid Metabolism	0.0361475	4	[B3GALT1, B4GALNT1, ST3GAL2, ST3GAL5]
M.24	GO:0021516	dorsal spinal cord development	0.0361475	4	[DAAM2, LMO4, PAX7, PBX3]		PAX7, PBX3
M.24	GO:1903034	regulation of response to wounding	0.0388029	14	[AJAP1, DUSP10, FGF13, HBEGF, MYOD1, PDGFA, PDPN, PRKCA, RTN4RL1, SERPINE2, TNFAIP3, TSPAN8, UBASH3B, WNT4]	SERPINE2, TSPAN8	MYOD1
M.24	GO:0010453	regulation of cell fate commitment	0.0430641	5	[AR, FGF13, FZD7, LMO4, PAX7]		AR, PAX7
M.24	R-HSA:3371571	HSF1-dependent transactivation	0.0430641	5	[HSPA1B, HSPA1L, HSPA2, HSPB8, PTGES3]
M.24	GO:0010959	regulation of metal ion transport	0.0433291	22	[ATP2A1, C4orf3, CACNG6, CALCR, CALM1, EDN3, EGF, GLRX, HECW1, HSPA2, MRLN, NANOS1, NEDD4L, NKAIN1, OPRD1, ORAI1, PRKCA, PSEN2, SERPINE2, SLC31A2, STK39, UBASH3B]	ATP2A1, NANOS1, SERPINE2
M.24	R-HSA:112315	Transmission across Chemical Synapses	0.043655	15	[ARL6IP5, CALM1, CHRNA5, ERBB4, GABRR2, GLRB, GLUL, GNAL, GRIK2, KCNJ12, PRKAG3, PRKCA, TUBA4A, TUBB4B, UNC13B]	KCNJ12
M.24	GO:0007218	neuropeptide signaling pathway	0.0441143	6	[GLRB, GPR37, LGALSL, NPY6R, OPRD1, SSTR1]
M.24	GO:0010766	negative regulation of sodium ion transport	0.044379	4	[HECW1, NEDD4L, SERPINE2, STK39]	SERPINE2
M.24	R-HSA:3371497	HSP90 chaperone cycle for steroid hormone receptors (SHR)	0.0452009	7	[AR, HSPA1B, HSPA1L, HSPA2, PTGES3, TUBA4A, TUBB4B]		AR
M.24	GO:0048588	developmental cell growth	0.0459036	16	[AKAP13, AUTS2, COBL, FGF13, IFRD1, MEX3C, NEDD4L, NIN, OLFM1, PAK1, RAPH1, RNF157, SEMA3C, SEMA4D, SMAD7, SOX9]	COBL	SOX9
M.24	GO:0009250	glucan biosynthetic process	0.046025	7	[GYG1, IRS1, PGM2L1, PPP1R3D, PRKAG3, PTGES3, STK39]
M.24	GO:0005978	glycogen biosynthetic process	0.046025	7	[GYG1, IRS1, PGM2L1, PPP1R3D, PRKAG3, PTGES3, STK39]
M.24	GO:0097581	lamellipodium organization	0.0465994	9	[ARPC2, AUTS2, GOLPH3, MSTN, NCK2, PDPN, PLCE1, RHOD, WASF3]
M.24	GO:0009968	negative regulation of signal transduction	0.0472173	58	[ACTN3, ACVR1, AIDA, APCDD1, APCDD1L, APPL1, AR, ATF3, C12orf66, CALM1, CASTOR3, CRY1, DDIT4L, DLK1, DUSP10, EGF, FAS, FGF13, GLG1, GRB10, GREM2, H2BC11, HBEGF, HDAC9, HECW1, HEY2, HSPA1B, IGFBP5, IRS1, IVNS1ABP, JADE1, MSTN, NCK2, OPTN, PLEKHA1, PPP2CB, PRKCA, RASA3, RGS10, SEC14L1, SERPINE2, SH3RF2, SHISA2, SIAH2, SKIL, SMAD7, SNX5, SOX9, SPRY2, TMEM25, TNFAIP3, TOB1, TP63, TRIB1, TSPAN15, UBAS…	SERPINE2	AR, ATF3, HEY2, SKIL, SOX9, TP63, ZNF385A
M.24	GO:0009132	nucleoside diphosphate metabolic process	0.0472821	13	[ACTN3, BPGM, GPD1, HOOK3, LDHA, NDC1, NME9, PFKFB3, PGK1, PGM2L1, PRKAG3, PRXL2C, TIGAR]
M.24	GO:0048880	sensory system development	0.0483188	21	[ATP8A2, CITED2, FGF13, FOXP2, GPD2, HCN1, IRX5, MAF, MAPRE2, MAX, MYF5, PBX3, PITX2, POU4F1, PRPH2, RET, SALL2, SKIL, SOX9, SPRY2, TMOD1]	IRX5, TMOD1	FOXP2, IRX5, MAF, MAX, MYF5, PBX3, PITX2, POU4F1, SALL2, SKIL, SOX9
M.25	GO:0001667	ameboidal-type cell migration	0.00481548	15	[CFL1, CYGB, EVL, LRP5, MEN1, NR2F2, PDGFB, PML, SCARB1, SEMA6B, SEMA7A, SOX18, TBXA2R, TGFB1, ZNF580]	CFL1, PML, TGFB1	NR2F2, SOX18, ZNF580
M.25	GO:0030198	extracellular matrix organization	0.00499285	13	[AGRN, COL18A1, CREB3L1, ENG, FOXF2, FSCN1, HSPG2, MMP15, PDGFB, SPOCK2, TGFB1, VWA1, VWF]	AGRN, COL18A1, ENG, TGFB1, VWA1	CREB3L1, FOXF2
M.25	GO:0043202	lysosomal lumen	0.00514344	7	[ACP2, AGRN, ATP13A2, CD74, CTSA, HSPG2, MTCH1]	AGRN, CD74
M.25	GO:0051149	positive regulation of muscle cell differentiation	0.00888103	6	[EHD1, EHD2, ENG, NIBAN2, TCF3, TGFB1]	EHD2, ENG, NIBAN2, TGFB1	TCF3
M.25	GO:0005912	adherens junction	0.00914319	8	[CDC42EP1, NECTIN2, NIBAN2, PIP5K1C, PPP1R9B, SHROOM1, TLN1, TMEM204]	CDC42EP1, NECTIN2, NIBAN2
M.25	R-HSA:381426	Regulation of Insulin-like Growth Factor (IGF) transport and uptake by Insulin-like Growth Factor Binding Proteins (IGFBPs)	0.00930398	6	[APOL1, IGFBP2, MEN1, SHISA5, VWA1, WFS1]	SHISA5, VWA1
M.25	GO:0099003	vesicle-mediated transport in synapse	0.0105966	8	[ADRA1D, CLSTN1, DRD4, GIT1, PIP5K1C, PRKAR1B, SEPTIN9, SLC17A7]
M.25	R-HSA:373755	Semaphorin interactions	0.0106701	5	[CFL1, PIP5K1C, RHOC, SEMA7A, TLN1]	CFL1
M.25	GO:0032355	response to estradiol	0.0112529	6	[GGT5, IGFBP2, MMP15, NR2F2, PPP1R9B, TGFB1]	TGFB1	NR2F2
M.25	GO:0006690	icosanoid metabolic process	0.0114204	5	[CBR1, CD74, EPHX1, GGT5, MGLL]	CD74, MGLL
M.25	GO:0032965	regulation of collagen biosynthetic process	0.0114313	4	[CREB3L1, CYGB, ENG, TGFB1]	ENG, TGFB1	CREB3L1
M.25	R-HSA:114608	Platelet degranulation	0.0114794	6	[CFL1, PDGFB, TGFB1, TLN1, TOR4A, VWF]	CFL1, TGFB1
M.25	GO:0048145	regulation of fibroblast proliferation	0.0115484	5	[BAX, CD74, PDGFB, PML, TGFB1]	CD74, PML, TGFB1
M.25	GO:0030308	negative regulation of cell growth	0.0117729	7	[PML, PPP1R9B, RTN4R, SEMA6B, SEMA7A, SESN2, TGFB1]	PML, TGFB1
M.25	WP:4258	LncRNA involvement in canonical Wnt signaling and colorectal cancer	0.0118177	5	[CCND3, FZD2, H19, LRP5, TCF3]		TCF3
M.25	GO:0005771	multivesicular body	0.0118397	4	[ATP13A2, CD74, LAMP1, PRKAR1B]	CD74, LAMP1
M.25	GO:0051147	regulation of muscle cell differentiation	0.0120009	7	[EHD1, EHD2, ENG, NIBAN2, PDGFB, TCF3, TGFB1]	EHD2, ENG, NIBAN2, TGFB1	TCF3
M.25	GO:1901343	negative regulation of vasculature development	0.0120362	6	[CREB3L1, HSPG2, NIBAN2, PDGFB, PML, TBXA2R]	NIBAN2, PML	CREB3L1
M.25	GO:0045216	cell-cell junction organization	0.0120902	7	[CSK, FSCN1, NECTIN2, PIP5K1C, RHOC, TGFB1, TLN1]	NECTIN2, TGFB1
M.25	R-HSA:76002	Platelet activation, signaling and aggregation	0.0139876	9	[CFL1, CSK, MGLL, PDGFB, TBXA2R, TGFB1, TLN1, TOR4A, VWF]	CFL1, MGLL, TGFB1
M.25	R-HSA:416482	G alpha (12/13) signalling events	0.0190768	4	[ADRA1D, ARHGEF10, RHOC, TBXA2R]
M.25	WP:51	Regulation of Actin Cytoskeleton	0.0246138	5	[CFL1, CSK, GIT1, PDGFB, PIP5K1C]	CFL1
M.25	GO:0048469	cell maturation	0.0257618	5	[AGRN, LHX6, MAP3K13, MTCH1, SOX18]	AGRN	LHX6, SOX18
M.25	GO:0007266	Rho protein signal transduction	0.0257618	5	[ADRA1D, ARHGEF10, CDC42EP1, CFL1, RTN4R]	CDC42EP1, CFL1
M.25	GO:0120034	positive regulation of plasma membrane bounded cell projection assembly	0.0297825	4	[AGRN, CDC42EP1, FSCN1, SEPTIN9]	AGRN, CDC42EP1
M.25	GO:0045446	endothelial cell differentiation	0.0297825	4	[COL18A1, ENG, NR2F2, SOX18]	COL18A1, ENG	NR2F2, SOX18
M.25	GO:0019724	B cell mediated immunity	0.0343019	4	[CD74, IL27RA, NECTIN2, TGFB1]	CD74, NECTIN2, TGFB1
M.25	GO:0021987	cerebral cortex development	0.0366394	4	[BAX, LHX6, MBOAT7, PPP1R9B]		LHX6
M.29	WP:111	Electron Transport Chain (OXPHOS system in mitochondria)	5.57841e-18	12	[ATP6, ATP8, COX1, COX2, COX3, CYTB, ND1, ND2, ND3, ND4, ND4L, ND5]	ATP6, ATP8, COX1, COX2, COX3, CYTB, ND1, ND2, ND3, ND4, ND4L, ND5
M.29	KEGG:00190	Oxidative phosphorylation	2.22507e-17	12	[ATP6, ATP8, COX1, COX2, COX3, CYTB, ND1, ND2, ND3, ND4, ND4L, ND5]	ATP6, ATP8, COX1, COX2, COX3, CYTB, ND1, ND2, ND3, ND4, ND4L, ND5
M.29	GO:0042773	ATP synthesis coupled electron transport	5.61981e-15	10	[COX1, COX3, CYTB, MTCO2P12, ND1, ND2, ND3, ND4, ND4L, ND5]	COX1, COX3, CYTB, MTCO2P12, ND1, ND2, ND3, ND4, ND4L, ND5
M.29	R-HSA:611105	Respiratory electron transport	2.69667e-13	9	[COX1, COX2, COX3, CYTB, ND1, ND2, ND3, ND4, ND5]	COX1, COX2, COX3, CYTB, ND1, ND2, ND3, ND4, ND5
M.29	GO:0045333	cellular respiration	1.90569e-12	10	[COX1, COX3, CYTB, MTCO2P12, ND1, ND2, ND3, ND4, ND4L, ND5]	COX1, COX3, CYTB, MTCO2P12, ND1, ND2, ND3, ND4, ND4L, ND5
M.30	GO:0036498	IRE1-mediated unfolded protein response	0.000357755	4	[COPS5, CTDSP2, EXTL3, HDGF]
M.31	GO:0008380	RNA splicing	5.93567e-05	54	[ACIN1, AKAP17A, AKAP8L, CASC3, CCAR2, CCDC130, CDK13, CIRBP, CLASRP, CLK2, CPSF1, CPSF7, CWF19L1, DAZAP1, DDX39B, DDX5, DHX35, DHX38, DHX8, EIF4A3, ERN1, FUS, GPATCH1, HNRNPA3, HNRNPH1, HNRNPM, KHDC4, LUC7L, LUC7L2, LUC7L3, METTL3, NONO, PABPN1, PNN, PTBP1, RBM10, RBM19, RBM28, RBM39, RBM4, RBM5, RBM6, SF3A3, SNRNP200, SNRNP70, SRRM1, SRRM2, SRRT, SRSF5, SUGP2, SUPT6H, TELO2, TSEN54, U2AF1L4]	SNRNP70	AKAP8L
M.31	GO:0006396	RNA processing	0.000105341	89	[ACIN1, ADARB1, ADAT1, AKAP17A, AKAP8L, CASC3, CCAR2, CCDC130, CCNL1, CDK13, CDK9, CIRBP, CLASRP, CLK2, CMTR1, CPSF1, CPSF7, CWF19L1, DAZAP1, DDX39B, DDX5, DDX51, DGCR8, DHX35, DHX38, DHX8, DUS1L, EIF4A3, ERN1, EXOSC10, EXOSC2, FUS, GPATCH1, GTPBP3, HNRNPA3, HNRNPH1, HNRNPM, INTS3, KHDC4, LAS1L, LUC7L, LUC7L2, LUC7L3, METTL3, NOL9, NONO, NVL, OSGEP, PABPN1, PAN2, PDCD11, PNN, PTBP1, QTRT1, RBM10,…	SNRNP70	AKAP8L, SAFB2
M.31	GO:0006397	mRNA processing	0.000154917	57	[ACIN1, ADARB1, AKAP17A, AKAP8L, CASC3, CCAR2, CDK13, CDK9, CIRBP, CLASRP, CMTR1, CPSF1, CPSF7, CWF19L1, DAZAP1, DDX39B, DDX5, DHX35, DHX38, DHX8, EIF4A3, ERN1, FUS, GPATCH1, HNRNPA3, HNRNPH1, HNRNPM, KHDC4, LUC7L, LUC7L2, LUC7L3, METTL3, NONO, PABPN1, PAN2, PDCD11, PNN, PTBP1, RBM10, RBM19, RBM28, RBM39, RBM4, RBM5, RBM6, SAFB2, SF3A3, SNRNP200, SNRNP70, SRRM1, SRRM2, SRRT, SRSF5, SUGP2, SUPT6H,…	SNRNP70	AKAP8L, SAFB2
M.31	GO:0016570	histone modification	0.00301547	47	[AKAP8, AKAP8L, ASXL1, ATXN7L3, AURKC, BAZ2A, BRD1, CDK9, CPA4, CXXC1, DNMT1, EHMT1, EHMT2, EP400, EZH1, FLCN, HDAC6, HSF4, ING5, KAT2A, KAT8, KDM5C, KDM5D, KMT5C, LDB1, MCM3AP, MSL1, MST1, MTHFR, NAA40, PHF8, RBM14, RCOR1, RING1, SETD5, SETDB1, SIN3A, SIN3B, SIRT6, SIRT7, SRCAP, SUPT6H, SUPT7L, TAF6L, TRRAP, USP36, ZNF335]	KAT2A	AKAP8, AKAP8L, BAZ2A, CXXC1, DNMT1, HSF4, SETDB1, SRCAP, ZNF335
M.31	GO:0034399	nuclear periphery	0.0123624	19	[AKAP8, AKAP8L, CAD, CXXC1, DDX39B, DGKQ, HNRNPM, KAT8, MAEA, NONO, NSMF, NUMA1, NUP107, PRR14, RGS12, SATB2, SRRM1, TELO2, TEP1]		AKAP8, AKAP8L, CXXC1, SATB2
M.31	GO:0051276	chromosome organization	0.0139586	87	[ACIN1, AKAP8, AKAP8L, ASXL1, ATXN7L3, AURKC, BAZ2A, BRD1, CABIN1, CDAN1, CDK9, CENPT, CHD8, CHTF18, CPA4, CTC1, CXXC1, DDX11, DNMT1, EHMT1, EHMT2, EP400, EXOSC10, EZH1, FBH1, FLCN, GATAD1, HDAC6, HSF4, ING5, KAT2A, KAT8, KDM5C, KDM5D, KMT5C, L3MBTL1, LDB1, MAU2, MCM3AP, MEI1, MOCOS, MSL1, MST1, MTHFR, NAA40, NASP, NUMA1, NUP107, PARP10, PHF8, PLK1, PNKP, POGZ, POLE, RAD54L2, RBBP7, RBM14, RCCD1,…	CHTF18, KAT2A	AKAP8, AKAP8L, BAZ2A, CENPT, CXXC1, DNMT1, HSF4, L3MBTL1, SATB2, SETDB1, SRCAP, ZBTB48, ZNF335
M.31	GO:0003729	mRNA binding	0.0310833	29	[ADARB1, CDK9, CIRBP, CPSF1, DAZAP1, DDX5, DND1, EIF4A1, EIF4A3, FUBP3, FUS, HNRNPA3, HNRNPM, ILF3, JRK, LUC7L, LUC7L2, LUC7L3, METTL3, NXF1, PTBP1, RBM14, RBM4, RBM5, SNRNP70, SRRM2, SRSF5, UNK, XPO5]	SNRNP70	JRK
M.31	GO:0010847	regulation of chromatin assembly	0.0369247	6	[DNMT1, NAA40, PARP10, PHF8, SETDB1, SIRT6]		DNMT1, SETDB1
M.31	GO:0005524	ATP binding	0.0389523	101	[ABCA7, ABCB8, ABCC10, ABCD4, ACSF3, ADCK2, AGAP2, ATAD3B, ATP13A1, AURKC, BCS1L, CAD, CARNS1, CDC42BPB, CDC42BPG, CDK10, CDK13, CDK9, CHD8, CHTF18, CLCN6, CLCN7, CLK2, COQ8B, CUL9, DDX11, DDX39B, DDX5, DDX51, DGKQ, DHX34, DHX35, DHX38, DHX8, DNAH1, DNHD1, EIF4A1, EIF4A3, ENTPD6, EP400, EPHB6, ERBB3, ERN1, FBH1, FCSK, FGFR4, FN3KRP, GAK, KIF13B, KIFC2, LIG3, LIMK2, LTK, MAP2K5, MAP3K14, MINK1, MO…	ATAD3B, CHTF18, TRPM4	SRCAP
M.32	GO:0009755	hormone-mediated signaling pathway	0.00902347	11	[AXIN1, CARM1, DDX54, NR1D1, NUP62, PARD3, PMEPA1, RARA, TADA3, WBP2, ZBTB7A]	CARM1, WBP2, ZBTB7A	NR1D1, RARA, ZBTB7A
M.32	R-HSA:1989781	PPARA activates gene expression	0.00932744	7	[CARM1, MED15, MED16, MED18, MED25, MED26, NR1D1]	CARM1, MED25	NR1D1
M.32	GO:0051092	positive regulation of NF-kappaB transcription factor activity	0.00933088	8	[CARM1, FLOT2, HSPA1A, IRAK1, TICAM1, TRAPPC9, TRIM8, ZBTB7A]	CARM1, ZBTB7A	ZBTB7A
M.32	GO:0006352	DNA-templated transcription, initiation	0.0098098	11	[MAZ, MED15, MED16, MED25, MED26, NR1D1, RARA, TAF3, TAF6, TEAD4, TRIM28]	MAZ, MED25, TAF6	MAZ, NR1D1, RARA, TEAD4
M.32	GO:0019888	protein phosphatase regulator activity	0.00996974	6	[CALM3, MRTFA, PPME1, PPP1R15A, PPP1R37, PPP6R2]
M.32	GO:0061629	RNA polymerase II-specific DNA-binding transcription factor binding	0.0100495	12	[DDX54, DUSP26, JUND, MED16, MED25, MTA1, NUP62, TADA3, TAF6, WBP2, ZBTB7A, ZFPM1]	MED25, TAF6, WBP2, ZBTB7A	JUND, ZBTB7A, ZFPM1
M.32	GO:1902275	regulation of chromatin organization	0.0104797	10	[BRD4, KMT2E, MAP1S, NOC2L, PHF1, PHF19, PYGO2, TADA3, TRIM28, WBP2]	MAP1S, WBP2	PHF1
M.32	GO:0032007	negative regulation of TOR signaling	0.0162362	4	[AKT1S1, CASTOR2, GSK3A, NPRL3]	CASTOR2
M.32	GO:0000793	condensed chromosome	0.0169917	8	[BRD4, CHMP1A, H2AX, PHF1, PMEPA1, RRAD, SUV39H1, SYN1]		PHF1
M.32	R-HSA:8936459	RUNX1 regulates genes involved in megakaryocyte differentiation and platelet function	0.0184044	4	[H2AX, KMT2E, TNRC6C, ZFPM1]		ZFPM1
M.32	WP:4754	IL-18 signaling pathway	0.0188209	9	[BIN1, HSPB1, IRAK1, KRT31, MEPCE, NACA, PRCC, ZBTB7A, ZNF219]	ZBTB7A	ZBTB7A, ZNF219
M.32	GO:0031110	regulation of microtubule polymerization or depolymerization	0.021316	5	[HSPA1A, MAP1S, MAPRE3, SLC25A23, TUBB4A]	MAP1S
M.32	GO:0045652	regulation of megakaryocyte differentiation	0.0214639	4	[KMT2E, THPO, TNRC6C, ZFPM1]		ZFPM1
M.32	GO:1901019	regulation of calcium ion transmembrane transporter activity	0.021778	5	[CALM3, JSRP1, RRAD, S100A1, SELENON]
M.32	GO:0002221	pattern recognition receptor signaling pathway	0.0234626	7	[HSPA1A, IRAK1, NR1D1, S100A1, TICAM1, TNIP2, ZCCHC3]		NR1D1
M.32	R-HSA:8939211	ESR-mediated signaling	0.0239201	7	[AXIN1, CALM3, CARM1, H2AX, HSPB1, JUND, TNRC6C]	CARM1	JUND
M.32	KEGG:04915	Estrogen signaling pathway	0.0288786	5	[CALM3, GNAS, HSPA1A, KRT31, RARA]		RARA
M.32	R-HSA:9018519	Estrogen-dependent gene expression	0.0324994	5	[AXIN1, CARM1, H2AX, JUND, TNRC6C]	CARM1	JUND
M.32	GO:0061035	regulation of cartilage development	0.0343126	4	[CARM1, LTBP3, RARA, ZNF219]	CARM1	RARA, ZNF219
M.32	GO:0050684	regulation of mRNA processing	0.0346971	6	[PUF60, SF1, SF3B4, SRPK3, ZBTB7A, ZC3H3]	ZBTB7A	ZBTB7A
M.32	GO:0099501	exocytic vesicle membrane	0.0406344	4	[CALM3, RAB11B, SYN1, SYNGR2]
M.32	GO:0030901	midbrain development	0.0406344	4	[CALM3, PITX3, RRAD, S100A1]		PITX3
M.32	GO:0030672	synaptic vesicle membrane	0.0406344	4	[CALM3, RAB11B, SYN1, SYNGR2]
M.32	WP:3594	Circadian rhythm related genes	0.0410575	6	[DBP, JUND, MTA1, NR1D1, RELB, SUV39H1]		DBP, JUND, NR1D1, RELB
M.33	GO:0043296	apical junction complex	0.0242118	11	[ARHGEF2, CLDN15, CLDN7, CNKSR3, CYTH2, FBF1, KIFC3, MICALL2, MPP3, NPHP4, PLEKHA7]	MICALL2
M.33	GO:0031267	small GTPase binding	0.0255396	25	[ARFIP2, ARHGAP4, ARHGEF1, ARHGEF2, ARHGEF25, DENND6B, ELMO3, GRASP, INF2, LLGL2, LZTR1, MICAL1, MICALL2, MYO9B, PKN3, PLEKHG2, PLEKHG5, RGL3, SPHK2, STK19, TBC1D10A, TBC1D2, TBC1D3, TNFRSF25, XPO6]	ARHGEF1, MICALL2, TNFRSF25
M.33	GO:0007264	small GTPase mediated signal transduction	0.0267443	29	[ARFIP2, ARHGAP39, ARHGAP4, ARHGEF1, ARHGEF19, ARHGEF2, ARHGEF25, CYTH2, DOK3, GPR35, ITGA3, LZTR1, MAPK11, MYO9B, PLD2, PLEKHG2, PLEKHG5, RAB35, RAB37, RAB40C, RAP1GAP2, RASL10A, RGL3, RRAGC, SHC1, SHC2, STK19, SYNGAP1, TNFRSF25]	ARHGEF1, PLD2, TNFRSF25
M.33	GO:0050953	sensory perception of light stimulus	0.0279338	12	[AOC2, ATXN7, CLN6, E2F1, EML2, GUCA1B, KIFC3, PRCD, RPGR, SEMA5B, STK19, ZNF513]		E2F1, ZNF513
M.33	GO:0043202	lysosomal lumen	0.0283808	9	[ACD, ARSA, CEL, GBAP1, GLB1, GPC2, IDUA, MANBA, RNASET2]	ARSA, IDUA
M.33	R-HSA:1650814	Collagen biosynthesis and modifying enzymes	0.0417043	7	[BMP1, COL23A1, COL27A1, COL5A3, COLGALT1, P3H1, PLOD3]	COL5A3
M.34	GO:0005743	mitochondrial inner membrane	1.38215e-96	150	[APOO, ATAD3A, ATP5F1C, ATP5MC1, ATP5MC3, ATP5MD, ATP5MG, ATP5MPL, ATP5PB, ATP5PD, ATP5PF, CHCHD3, COA1, COQ3, COQ5, COX20, COX4I1, COX5A, COX5B, COX6B1, COX6C, COX7A2, COX7A2L, COX7B, COX7C, CYC1, CYCS, DAP3, DHODH, DMAC1, DMAC2, DNAJC15, DNAJC19, DNAJC30, ECSIT, ENDOG, ERAL1, GCAT, GRPEL1, HCCS, HIGD1A, IMMP1L, MAIP1, MCUR1, MICOS10, MPC1, MPC2, MPV17L2, MRPL1, MRPL13, MRPL15, MRPL16, MRPL18, M…	ATP5MC3, ATP5PB, ATP5PF, COQ5, COX6B1, MRPS18B, MRPS7, NDUFA12, NDUFA6, NDUFA8, NDUFAB1, NDUFB5, NDUFS3, PHB, UQCRC1, UQCRFS1, UQCRH	CHCHD3
M.34	GO:0005739	mitochondrion	1.17987e-92	246	[ABHD10, ACO2, ACOT13, ADHFE1, APOO, ATAD3A, ATP5F1C, ATP5IF1, ATP5MC1, ATP5MC3, ATP5MD, ATP5MG, ATP5MPL, ATP5PB, ATP5PD, ATP5PF, ATPAF2, BCKDK, BOLA3, C12orf65, C1QBP, CARS2, CHCHD3, CIAPIN1, CISD1, CLYBL, CMC1, CMC2, COA1, COA5, COQ3, COQ5, COX20, COX4I1, COX5A, COX5B, COX6B1, COX6C, COX7A2, COX7A2L, COX7B, COX7C, CRYM, CYB5B, CYC1, CYCS, DAP3, DCTPP1, DHODH, DHRS4, DMAC1, DMAC2, DNAJC15, DNAJC…	ATP5MC3, ATP5PB, ATP5PF, COQ5, COX6B1, MRPS18B, MRPS7, NDUFA12, NDUFA6, NDUFA8, NDUFAB1, NDUFB5, NDUFS3, PHB, SUCLG1, UQCRC1, UQCRFS1, UQCRH	CHCHD3
M.34	GO:0019866	organelle inner membrane	2.062e-89	150	[APOO, ATAD3A, ATP5F1C, ATP5MC1, ATP5MC3, ATP5MD, ATP5MG, ATP5MPL, ATP5PB, ATP5PD, ATP5PF, CHCHD3, COA1, COQ3, COQ5, COX20, COX4I1, COX5A, COX5B, COX6B1, COX6C, COX7A2, COX7A2L, COX7B, COX7C, CYC1, CYCS, DAP3, DHODH, DMAC1, DMAC2, DNAJC15, DNAJC19, DNAJC30, ECSIT, ENDOG, ERAL1, GCAT, GRPEL1, HCCS, HIGD1A, IMMP1L, MAIP1, MCUR1, MICOS10, MPC1, MPC2, MPV17L2, MRPL1, MRPL13, MRPL15, MRPL16, MRPL18, M…	ATP5MC3, ATP5PB, ATP5PF, COQ5, COX6B1, MRPS18B, MRPS7, NDUFA12, NDUFA6, NDUFA8, NDUFAB1, NDUFB5, NDUFS3, PHB, UQCRC1, UQCRFS1, UQCRH	CHCHD3
M.34	GO:0098798	mitochondrial protein complex	7.44036e-77	104	[APOO, ATP5F1C, ATP5MC1, ATP5MC3, ATP5MD, ATP5MG, ATP5MPL, ATP5PB, ATP5PD, ATP5PF, BCKDK, C12orf65, CHCHD3, COX4I1, COX5A, COX7C, CYC1, DAP3, DMAC1, DMAC2, DNAJC15, DNAJC19, GRPEL1, IMMP1L, MICOS10, MPV17L2, MRPL13, MRPL15, MRPL16, MRPL18, MRPL2, MRPL21, MRPL22, MRPL27, MRPL32, MRPL33, MRPL36, MRPL37, MRPL39, MRPL4, MRPL41, MRPL45, MRPL47, MRPL48, MRPL58, MRPS11, MRPS12, MRPS14, MRPS17, MRPS18A, …	ATP5MC3, ATP5PB, ATP5PF, MRPS18B, MRPS7, NDUFA12, NDUFA6, NDUFA8, NDUFAB1, NDUFB5, NDUFS3, UQCRC1, UQCRFS1, UQCRH	CHCHD3
M.34	KEGG:00190	Oxidative phosphorylation	6.99905e-45	56	[ATP5F1C, ATP5MC1, ATP5MC3, ATP5MG, ATP5PB, ATP5PD, ATP5PF, ATP6V0B, ATP6V1D, COX4I1, COX5A, COX5B, COX6B1, COX6C, COX7A2, COX7A2L, COX7B, COX7C, CYC1, NDUFA1, NDUFA12, NDUFA4, NDUFA5, NDUFA6, NDUFA8, NDUFA9, NDUFAB1, NDUFB1, NDUFB10, NDUFB2, NDUFB3, NDUFB4, NDUFB5, NDUFB6, NDUFB8, NDUFB9, NDUFC1, NDUFC2, NDUFS3, NDUFS4, NDUFS7, NDUFS8, NDUFV1, PPA1, PPA2, SDHA, SDHB, SDHD, UQCR10, UQCR11, UQCRB,…	ATP5MC3, ATP5PB, ATP5PF, COX6B1, NDUFA12, NDUFA6, NDUFA8, NDUFAB1, NDUFB5, NDUFS3, UQCRC1, UQCRFS1, UQCRH
M.34	GO:0006119	oxidative phosphorylation	4.1026e-41	57	[ATP5F1C, ATP5MC1, ATP5MC3, ATP5MG, ATP5PB, ATP5PD, ATP5PF, COX4I1, COX5A, COX5B, COX6B1, COX6C, COX7A2, COX7A2L, COX7B, COX7C, CYC1, CYCS, DNAJC15, DNAJC30, ISCU, NDUFA1, NDUFA12, NDUFA4, NDUFA5, NDUFA6, NDUFA8, NDUFA9, NDUFAB1, NDUFB1, NDUFB10, NDUFB2, NDUFB3, NDUFB4, NDUFB5, NDUFB6, NDUFB8, NDUFB9, NDUFC1, NDUFC2, NDUFS3, NDUFS4, NDUFS7, NDUFS8, NDUFV1, SDHA, SDHD, STOML2, TEFM, UQCR10, UQCR11…	ATP5MC3, ATP5PB, ATP5PF, COX6B1, NDUFA12, NDUFA6, NDUFA8, NDUFAB1, NDUFB5, NDUFS3, UQCRC1, UQCRFS1, UQCRH
M.34	GO:0009060	aerobic respiration	7.12406e-18	29	[ACO2, COX4I1, COX5A, COX5B, COX6B1, COX6C, COX7A2L, COX7B, COX7C, CYCS, FAHD1, IDH1, IDH2, IDH3G, MDH2, MTFR1L, NDUFA4, NDUFS7, NDUFS8, OXA1L, SDHA, SDHB, SDHD, SUCLG1, UQCR10, UQCRB, UQCRC1, UQCRH, UQCRHL]	COX6B1, SUCLG1, UQCRC1, UQCRH
M.34	GO:1990542	mitochondrial transmembrane transport	6.04634e-14	26	[ATP5F1C, ATP5MC1, ATP5MC3, ATP5MG, ATP5PB, ATP5PD, ATP5PF, COX5B, CYC1, DNAJC15, DNAJC19, DNAJC30, GRPEL1, MAIP1, MCUR1, MPC1, MPC2, MRPL18, SFXN4, STOML2, TIMM17A, TIMM21, TIMM23, TIMM44, TIMM50, TOMM40L]	ATP5MC3, ATP5PB, ATP5PF
M.34	GO:0032592	integral component of mitochondrial membrane	4.03826e-09	19	[APOO, CHCHD3, COA1, FUNDC1, MCUR1, MFF, MICOS10, MPC1, MPC2, MTX2, OXA1L, SFXN4, SLC25A19, SLC25A3, SLC25A4, TIMM17A, TIMM23, TMEM177, TMEM70]		CHCHD3
M.34	R-HSA:71406	Pyruvate metabolism and Citric Acid (TCA) cycle	3.84615e-08	14	[ACO2, ADHFE1, FAHD1, GSTZ1, HAGH, IDH2, IDH3G, MDH2, MPC1, MPC2, SDHA, SDHB, SDHD, SUCLG1]	SUCLG1
M.34	R-HSA:8949613	Cristae formation	9.41162e-08	11	[APOO, ATP5F1C, ATP5MC1, ATP5MC3, ATP5MG, ATP5PB, ATP5PD, ATP5PF, CHCHD3, MICOS10, MTX2]	ATP5MC3, ATP5PB, ATP5PF	CHCHD3
M.34	GO:0018065	protein-cofactor linkage	7.61048e-06	6	[GCSH, GLRX5, HMBS, LIAS, LIPT1, NDUFAB1]	NDUFAB1
M.34	R-HSA:389661	Glyoxylate metabolism and glycine degradation	0.000655868	6	[DDO, GCSH, GRHPR, LIAS, LIPT1, NDUFAB1]	GRHPR, NDUFAB1
M.34	R-HSA:8949215	Mitochondrial calcium ion transport	0.000835339	6	[MAIP1, PHB, PHB2, STOML2, VDAC2, VDAC3]	PHB
M.34	GO:0019752	carboxylic acid metabolic process	0.00123676	57	[ABHD10, ACO2, ADHFE1, AHCY, ARV1, BCKDK, CARS2, CREM, CRYM, DDO, DECR2, ECHS1, ECI1, FABP3, GCAT, GCSH, GRHPR, GSTZ1, HACD1, HAGH, HMGCL, IDH1, IDH2, IDH3G, IDO1, LIAS, LYPLA2, MCAT, MDH2, MECR, MGST2, MGST3, MPC1, MPC2, MRPS36, NDUFAB1, NUP37, PCBD1, PECR, PPA1, PPA2, PRKAG1, PSMD8, PTGDS, PYCR2, QARS1, QRSL1, RIDA, SDHA, SDHB, SLC25A21, THAP4, TXN2, UROS, VDAC2, WARS1, WARS2]	GRHPR, NDUFAB1	CREM, THAP4
M.34	GO:0042579	microbody	0.00186076	14	[CRYM, DDO, DECR2, DHRS4, FNDC5, GRHPR, HMGCL, IDH1, IDH2, MFF, MVK, PECR, PMVK, RIDA]	GRHPR
M.34	GO:0005777	peroxisome	0.00186076	14	[CRYM, DDO, DECR2, DHRS4, FNDC5, GRHPR, HMGCL, IDH1, IDH2, MFF, MVK, PECR, PMVK, RIDA]	GRHPR
M.34	GO:0006520	cellular amino acid metabolic process	0.00312171	24	[ADHFE1, AHCY, BCKDK, CARS2, CRYM, DDO, GCAT, GCSH, GSTZ1, HMGCL, IDO1, PCBD1, PPA1, PPA2, PSMD8, PYCR2, QARS1, QRSL1, RIDA, SLC25A21, THAP4, TXN2, WARS1, WARS2]		THAP4
M.34	GO:0042254	ribosome biogenesis	0.00387414	24	[C1QBP, ERAL1, EXOSC7, EXOSC9, FCF1, LTV1, MPHOSPH6, MPV17L2, MRM1, MRM3, MRPL1, MRPL22, MRPL36, MRPS11, MRPS2, MRPS7, MTG2, NOP16, NSUN5, POP4, RPUSD2, RRP9, SNU13, ZCCHC4]	MRPS7
M.34	R-HSA:77289	Mitochondrial Fatty Acid Beta-Oxidation	0.00480011	6	[ACOT13, ECHS1, ECI1, MCAT, MECR, NDUFAB1]	NDUFAB1
M.34	GO:0009165	nucleotide biosynthetic process	0.009387	20	[ATP5F1C, ATP5MC1, ATP5MC3, ATP5MG, ATP5PB, ATP5PD, ATP5PF, COX5B, CYC1, DHODH, DNAJC30, GSTZ1, HACD1, IDH2, IDO1, MPC1, MPC2, NAXE, NME6, STOML2]	ATP5MC3, ATP5PB, ATP5PF
M.34	GO:1901293	nucleoside phosphate biosynthetic process	0.00968719	20	[ATP5F1C, ATP5MC1, ATP5MC3, ATP5MG, ATP5PB, ATP5PD, ATP5PF, COX5B, CYC1, DHODH, DNAJC30, GSTZ1, HACD1, IDH2, IDO1, MPC1, MPC2, NAXE, NME6, STOML2]	ATP5MC3, ATP5PB, ATP5PF
M.34	GO:0008757	S-adenosylmethionine-dependent methyltransferase activity	0.0386828	12	[COQ3, COQ5, DPH5, INMT, METTL2A, MRM1, MRM3, NSUN5, SETD9, TPMT, TRMT10C, ZCCHC4]	COQ5
M.4	GO:0005925	focal adhesion	0.000147196	24	[ACTR3, ARHGAP31, ARHGEF7, CAPN2, CYFIP1, DLC1, EZR, FLT1, HYOU1, ITGA1, ITGA6, KLF11, MAPRE1, NRP1, NUMB, PACSIN2, PEAK1, PTK2, PTPN12, SHROOM4, SPRY4, TEK, TNS3, YES1]	ARHGAP31, DLC1, ITGA1, ITGA6, NRP1	KLF11
M.4	GO:0016324	apical plasma membrane	0.00050596	16	[ADRB2, CD300LG, ENPEP, EZR, KL, PODXL, PTK2, SHROOM4, SLC1A1, SLC23A2, SLC39A8, SLC4A7, SLC52A3, STX3, TEK, TJP1]	PODXL
M.4	GO:0007044	cell-substrate junction assembly	0.00101359	10	[ARHGEF7, DLC1, ITGA6, KDR, NRP1, PEAK1, PTK2, PTPRK, RCC2, TEK]	DLC1, ITGA6, KDR, NRP1
M.4	WP:1539	Angiogenesis	0.00121453	5	[FLT1, KDR, PTK2, SMAD1, TEK]	KDR	SMAD1
M.4	GO:0043087	regulation of GTPase activity	0.00165347	20	[AFDN, ARHGAP29, ARHGAP31, ARHGEF7, ASAP1, DLC1, ERRFI1, ITGA6, LRCH1, NRP1, PLXNA2, PTK2, RASAL2, RCC2, RGS5, RIN2, S1PR1, SIPA1L1, SRGAP2, TBCK]	ARHGAP31, DLC1, ITGA6, NRP1, RGS5, S1PR1
M.4	GO:0030175	filopodium	0.00320326	8	[CYFIP1, EZR, ITGA6, KITLG, MYO10, MYO1B, PODXL, SPATA13]	ITGA6, MYO1B, PODXL
M.4	GO:0098857	membrane microdomain	0.00326634	15	[BAALC, CAPN2, CAVIN2, DLC1, EDNRB, EZR, ITGA1, KDR, PACSIN2, PAG1, PODXL, S1PR1, STOM, SYNJ2, TEK]	CAVIN2, DLC1, ITGA1, KDR, PODXL, S1PR1
M.4	GO:1904018	positive regulation of vasculature development	0.00326689	11	[ANXA3, CDH5, ETS1, FLT1, KDR, NRP1, PPP1R16B, RIN2, SMAD1, TEK, TJP1]	CDH5, ETS1, KDR, NRP1	ETS1, SMAD1
M.4	GO:0048514	blood vessel morphogenesis	0.00356566	22	[ADAMTS9, ADGRF5, ANXA3, APLN, CDH5, ELK3, ENPEP, EPAS1, ETS1, FLT1, KDR, NRP1, PPP1R16B, PRDM1, PTK2, PTPRB, RIN2, S1PR1, SLC1A1, SMAD1, TEK, TJP1]	ADGRF5, CDH5, ETS1, KDR, NRP1, PTPRB, S1PR1	ELK3, EPAS1, ETS1, PRDM1, SMAD1
M.4	KEGG:04014	Ras signaling pathway	0.00366573	11	[AFDN, ETS1, ETS2, FLT1, KDR, KITLG, RAPGEF5, RASAL2, RASGRF2, SHC4, TEK]	ETS1, KDR	ETS1, ETS2
M.4	GO:0043114	regulation of vascular permeability	0.00417571	5	[CDH5, PDE3A, TEK, TJP1, YES1]	CDH5
M.4	WP:4541	Hippo-Merlin Signaling Dysregulation	0.00436632	8	[CDH5, CDH8, FLT1, ITGA1, ITGA6, KDR, PTK2, TEK]	CDH5, ITGA1, ITGA6, KDR
M.4	GO:1903727	positive regulation of phospholipid metabolic process	0.00455828	5	[ADGRF5, CAPN2, FLT1, PTK2, TEK]	ADGRF5
M.4	GO:0051056	regulation of small GTPase mediated signal transduction	0.00648608	14	[ARFGEF3, ARHGAP29, ARHGAP31, ARHGEF3, ARHGEF7, ARHGEF9, DLC1, ITPKB, KITLG, NRP1, RASGRF2, SIPA1L1, SPRY4, SRGAP2]	ARHGAP31, DLC1, NRP1
M.4	GO:0045785	positive regulation of cell adhesion	0.00740925	15	[AFDN, ARHGEF7, DENND6A, ETS1, ITGA6, ITPKB, KDR, MYO10, NRP1, PODXL, RIN2, STX3, TEK, TJP1, YES1]	ETS1, ITGA6, KDR, NRP1, PODXL	ETS1
M.4	GO:0036010	protein localization to endosome	0.00742275	4	[ANKRD13A, EZR, NRP1, PACSIN2]	NRP1
M.4	GO:0042581	specific granule	0.00927452	8	[ANXA3, CD93, CYFIP1, DLC1, HGSNAT, PTPRB, STOM, STX3]	CD93, DLC1, PTPRB
M.4	WP:117	GPCRs, Other	0.00938814	4	[ADGRF5, ADRB2, ALG6, S1PR1]	ADGRF5, S1PR1
M.4	KEGG:04924	Renin secretion	0.00997533	5	[ADRB2, GUCY1A2, GUCY1B1, PDE3A, PTGER4]
M.4	GO:0097581	lamellipodium organization	0.0121997	6	[ACTR3, ARHGEF7, CYFIP1, S1PR1, SPATA13, SRGAP2]	S1PR1
M.4	GO:0030695	GTPase regulator activity	0.0143843	12	[ARHGAP29, ARHGAP31, ASAP1, DLC1, ERRFI1, NRP1, RASAL2, RGS5, RIN2, SIPA1L1, SRGAP2, TBCK]	ARHGAP31, DLC1, NRP1, RGS5
M.4	WP:2858	Ectoderm Differentiation	0.0145042	7	[ARHGEF9, CDH8, PLXNA2, PODXL, PTPRB, ST8SIA4, TTC14]	PODXL, PTPRB
M.4	GO:0002262	myeloid cell homeostasis	0.0158346	8	[ADGRF5, EPAS1, ETS1, ITPKB, KITLG, KLF13, PTBP3, SH2B3]	ADGRF5, ETS1	EPAS1, ETS1, KLF13
M.4	R-HSA:373760	L1CAM interactions	0.0209706	6	[EZR, ITGA1, NRP1, NUMB, SCN3B, SCN4B]	ITGA1, NRP1
M.4	GO:0001894	tissue homeostasis	0.0210999	9	[ADGRF5, ADRB2, CDH5, EPAS1, MDM1, S1PR1, SLC1A1, SLC39A8, TJP1]	ADGRF5, CDH5, S1PR1	EPAS1
M.4	GO:0006275	regulation of DNA replication	0.0244452	6	[CDK2, DACH1, LRIG3, POLG2, RFC5, SLFN11]		DACH1
M.4	GO:0002027	regulation of heart rate	0.0265372	5	[AVPR1A, EPAS1, SCN3B, SCN4B, SLC1A1]		EPAS1
M.4	GO:0060840	artery development	0.032766	5	[ADAMTS9, ADGRF5, LUZP1, NRP1, PRDM1]	ADGRF5, NRP1	PRDM1
M.4	KEGG:04510	Focal adhesion	0.0329223	8	[CAPN2, COL4A6, FLT1, ITGA1, ITGA6, KDR, PTK2, SHC4]	ITGA1, ITGA6, KDR
M.4	GO:1902936	phosphatidylinositol bisphosphate binding	0.0381884	5	[ASAP1, MYO1B, STXBP6, TTPAL, WDR45B]	MYO1B
M.4	WP:185	Integrin-mediated Cell Adhesion	0.0437314	5	[ARHGEF7, CAPN2, ITGA1, ITGA6, PTK2]	ITGA1, ITGA6
M.4	GO:0001217	DNA-binding transcription repressor activity	0.0458088	8	[DACH1, ELK3, ETS2, ETV6, NFIL3, PRDM1, ZNF217, ZNF589]		DACH1, ELK3, ETS2, ETV6, NFIL3, PRDM1, ZNF217, ZNF589
M.5	GO:0050994	regulation of lipid catabolic process	0.000732175	6	[ADRA2A, CIDEA, LGALS12, PDE3B, PRKCD, RARRES2]	ADRA2A, CIDEA, LGALS12, PDE3B
M.5	GO:0019216	regulation of lipid metabolic process	0.000780397	15	[ADIPOQ, ADRA2A, CES1, CIDEA, ELOVL5, FASN, FGF2, GPAM, LEP, LGALS12, PDE3B, PRKCD, RARRES2, SCD, THRSP]	ADIPOQ, ADRA2A, CIDEA, LEP, LGALS12, PDE3B, SCD
M.5	R-HSA:75105	Fatty acyl-CoA biosynthesis	0.000786363	5	[ELOVL5, FASN, HACD2, SCD, SLC25A1]	SCD
M.5	R-HSA:418594	G alpha (i) signalling events	0.000810715	11	[ADRA2A, C5, DHRS3, MYO7A, PDE1B, PPP1R1B, PPP2R1B, PRKAR2B, PRKCD, PTGER3, RBP4]	ADRA2A, PPP1R1B, PRKAR2B, PTGER3, RBP4
M.5	R-HSA:163685	Integration of energy metabolism	0.000966395	7	[ABCC8, ADIPOQ, ADRA2A, FASN, PPP2R1B, PRKAR2B, STXBP1]	ADIPOQ, ADRA2A, PRKAR2B
M.5	GO:0046879	hormone secretion	0.00167733	11	[ABCC8, ADIPOQ, ADRA2A, CPAMD8, EFNA5, HFE, LEP, NMB, NNAT, PASK, RBP4]	ADIPOQ, ADRA2A, LEP, RBP4
M.5	R-HSA:381340	Transcriptional regulation of white adipocyte differentiation	0.00248636	6	[ADIPOQ, ADIRF, CEBPA, LEP, PCK1, PLIN1]	ADIPOQ, ADIRF, LEP, PLIN1	CEBPA
M.5	GO:0016101	diterpenoid metabolic process	0.00453758	5	[ADH1B, DHRS3, RARRES2, RBP4, SCPEP1]	RBP4
M.5	GO:1903034	regulation of response to wounding	0.00648652	7	[ABCC8, ADRA2A, DUOX1, FGF2, PRKCD, PTPRF, SOX15]	ADRA2A	SOX15
M.5	GO:0051591	response to cAMP	0.00651344	5	[ADIPOQ, DUOX1, FOSB, MMP19, PCK1]	ADIPOQ	FOSB
M.5	GO:0051952	regulation of amine transport	0.00813181	4	[ADRA2A, CPAMD8, LEP, STXBP1]	ADRA2A, LEP
M.5	GO:0015837	amine transport	0.00852905	4	[ADRA2A, CPAMD8, LEP, STXBP1]	ADRA2A, LEP
M.5	KEGG:04910	Insulin signaling pathway	0.00899126	6	[FASN, PCK1, PDE3B, PRKAR2B, PTPRF, PYGL]	PDE3B, PRKAR2B
M.5	KEGG:03320	PPAR signaling pathway	0.0104521	4	[ADIPOQ, PCK1, PLIN1, SCD]	ADIPOQ, PLIN1, SCD
M.5	GO:0046660	female sex differentiation	0.0108371	5	[FST, LEP, MMP19, RBP4, TYRO3]	LEP, RBP4
M.5	R-HSA:196849	Metabolism of water-soluble vitamins and cofactors	0.0152051	5	[CUBN, CYB5A, FASN, PARP16, SLC19A3]	SLC19A3
M.5	GO:0006805	xenobiotic metabolic process	0.0187726	4	[CES1, MGST1, MTARC1, PHGDH]	MGST1
M.5	GO:0072329	monocarboxylic acid catabolic process	0.0206611	5	[ADIPOQ, IDNK, LEP, PCK1, PHGDH]	ADIPOQ, LEP
M.5	GO:0034754	cellular hormone metabolic process	0.0224626	4	[ADH1B, DHRS3, RBP4, SCPEP1]	RBP4
M.7	GO:0045934	negative regulation of nucleobase-containing compound metabolic process	0.000564062	51	[ANKRD52, BCL7A, BCOR, CBFA2T2, CBX7, CC2D1B, CREBBP, DAB2IP, DNMT3A, DPF2, EP300, FOXK1, FOXK2, GATAD2B, HDAC5, HNRNPA0, HNRNPL, IKZF4, IRF2BP2, JUN, KDM2A, KDM2B, KMT2D, LARP1, MBD1, METTL16, NAT10, NMNAT1, PATZ1, PBXIP1, PER1, PHF2, PRDM2, RERE, RREB1, RXRA, SMARCC2, SPEN, SREBF2, SUFU, TENT4A, TERF2, TFDP2, THRA, TIRAP, TLE1, TOB2, UBQLN4, ZBTB4, ZC3H4, ZHX2]	CREBBP, DAB2IP, FOXK2, LARP1, RXRA, THRA	FOXK1, FOXK2, GATAD2B, IKZF4, JUN, KDM2A, KDM2B, MBD1, PATZ1, PRDM2, RREB1, RXRA, SPEN, SREBF2, TERF2, TFDP2, THRA, ZBTB4, ZHX2
M.7	GO:0043565	sequence-specific DNA binding	0.00187058	39	[ALX4, ANKRD52, BCOR, CC2D1B, CREBBP, DNMT3A, DPF2, EP300, FOXJ2, FOXK1, FOXK2, GATAD2B, HDAC5, IKZF4, JUN, KDM2A, KDM2B, MAFB, MAFG, MBD1, MED12, MEF2D, PATZ1, PER1, PKNOX2, PRDM2, RERE, RREB1, RXRA, SMARCC2, SREBF2, TCF20, TERF2, TFDP2, THRA, XBP1, ZBED1, ZBTB4, ZNF142]	CREBBP, FOXK2, RXRA, THRA, ZNF142	ALX4, FOXJ2, FOXK1, FOXK2, GATAD2B, IKZF4, JUN, KDM2A, KDM2B, MAFB, MAFG, MBD1, MEF2D, PATZ1, PKNOX2, PRDM2, RREB1, RXRA, SREBF2, TCF20, TERF2, TFDP2, THRA, XBP1, ZBED1, ZBTB4, ZNF142
M.7	R-HSA:3247509	Chromatin modifying enzymes	0.00200274	15	[ARID1B, BRPF1, BRPF3, CREBBP, DNMT3A, EP300, GATAD2B, H2BC6, KDM2A, KDM2B, KDM4B, KMT2D, PHF2, SMARCC2, TADA2B]	ARID1B, CREBBP	GATAD2B, KDM2A, KDM2B
M.7	R-HSA:4839726	Chromatin organization	0.00200274	15	[ARID1B, BRPF1, BRPF3, CREBBP, DNMT3A, EP300, GATAD2B, H2BC6, KDM2A, KDM2B, KDM4B, KMT2D, PHF2, SMARCC2, TADA2B]	ARID1B, CREBBP	GATAD2B, KDM2A, KDM2B
M.7	R-HSA:5617472	Activation of anterior HOX genes in hindbrain development during early embryogenesis	0.00354846	8	[CREBBP, EP300, H2BC6, JUN, KMT2D, MAFB, POLR2D, RXRA]	CREBBP, RXRA	JUN, MAFB, RXRA
M.7	GO:0006325	chromatin organization	0.0102839	27	[ARID1B, BCOR, BRD2, BRPF1, BRPF3, CBX7, CREBBP, DNMT3A, DPF2, EP300, GATAD2B, H2BC6, HDAC5, HUWE1, KDM2A, KDM2B, KDM4B, KMT2D, MBD1, MLLT6, NOS1, PER1, PHF2, RERE, SMARCC2, TADA2B, UBN1]	ARID1B, CREBBP, HUWE1	GATAD2B, KDM2A, KDM2B, MBD1
M.7	GO:0043547	positive regulation of GTPase activity	0.010952	17	[AGAP1, AKT2, ARHGAP35, ARHGEF11, ASAP3, BCAS3, DAB2IP, DVL2, IQSEC1, JUN, LLGL1, NDEL1, RAPGEF1, RASA4B, RUNDC1, SGSM2, TBC1D9B]	DAB2IP, RAPGEF1	ARHGAP35, JUN, SGSM2
M.7	GO:0051129	negative regulation of cellular component organization	0.0114344	26	[ADD1, ALPK3, ATXN2, BCAS3, BCOR, CBFA2T2, EP300, HUWE1, KDM4B, KREMEN1, LLGL1, LRP4, MAP4, MED12, MID1IP1, MLLT6, MPV17L, NAT10, NMNAT1, PEX5, PHF2, SPTB, TERF2, THRA, TOM1L2, UBQLN4]	HUWE1, THRA, TOM1L2	TERF2, THRA
M.7	GO:0043087	regulation of GTPase activity	0.0129808	19	[AGAP1, AKT2, ARHGAP35, ARHGEF11, ASAP3, BCAS3, DAB2IP, DVL2, IQSEC1, JUN, LLGL1, NDEL1, PLXNA1, RAPGEF1, RASA4B, RTKN, RUNDC1, SGSM2, TBC1D9B]	DAB2IP, RAPGEF1	ARHGAP35, JUN, SGSM2
M.7	GO:0009895	negative regulation of catabolic process	0.0138674	15	[CRTC3, DAB2IP, DYSF, EIF4G1, FOXK1, FOXK2, HNRNPA0, LARP1, METTL16, NMNAT1, SUFU, TENT4A, TIRAP, UBQLN4, USP19]	DAB2IP, EIF4G1, FOXK2, LARP1	FOXK1, FOXK2
M.7	GO:0042594	response to starvation	0.0164567	11	[AMBRA1, BCAS3, FOXK1, FOXK2, GCN1, HNRNPL, JUN, LARP1, RPTOR, SREBF2, XBP1]	FOXK2, LARP1	FOXK1, FOXK2, JUN, SREBF2, XBP1
M.7	GO:0045948	positive regulation of translational initiation	0.0169325	4	[LARP1, POLR2D, RXRA, YTHDF1]	LARP1, RXRA	RXRA
M.7	GO:0043009	chordate embryonic development	0.0169624	23	[ADD1, ALX4, AMBRA1, ARHGAP35, BCOR, BRD2, DVL2, ELL, EP300, HS6ST1, KDM2B, MAFG, MED12, NDEL1, NDST1, PKD1, PLCD3, POLR2D, RDH10, RUNDC1, RXRA, SUFU, TAF8]	RXRA	ALX4, ARHGAP35, KDM2B, MAFG, RXRA
M.7	GO:0036498	IRE1-mediated unfolded protein response	0.0172081	6	[ADD1, CUL7, DAB2IP, DCTN1, SRPRA, XBP1]	DAB2IP	XBP1
M.7	GO:0050994	regulation of lipid catabolic process	0.0172257	5	[AKT2, CRTC3, DAGLB, IRS2, THRA]	THRA	THRA
M.7	GO:0031103	axon regeneration	0.0181916	5	[DAG1, JUN, KREMEN1, LMNB2, NDEL1]		JUN
M.7	GO:0009792	embryo development ending in birth or egg hatching	0.018306	23	[ADD1, ALX4, AMBRA1, ARHGAP35, BCOR, BRD2, DVL2, ELL, EP300, HS6ST1, KDM2B, MAFG, MED12, NDEL1, NDST1, PKD1, PLCD3, POLR2D, RDH10, RUNDC1, RXRA, SUFU, TAF8]	RXRA	ALX4, ARHGAP35, KDM2B, MAFG, RXRA
M.7	GO:1902850	microtubule cytoskeleton organization involved in mitosis	0.0189291	8	[DCTN1, DYNC1H1, HTT, MAP4, NDEL1, PKD1, SUN2, TACC2]	TACC2
M.7	GO:0010506	regulation of autophagy	0.0190423	15	[AMBRA1, ATG13, EIF4G1, EP300, FOXK1, FOXK2, HTT, HUWE1, LARP1, PSAP, RPTOR, SREBF2, TMEM150A, UBQLN4, XBP1]	EIF4G1, FOXK2, HUWE1, LARP1	FOXK1, FOXK2, SREBF2, XBP1
M.7	GO:0090316	positive regulation of intracellular protein transport	0.0198198	10	[AKT2, ATG13, BCAS3, HUWE1, JUP, MBD1, SEC16A, SREBF2, TFDP2, TM9SF4]	HUWE1	MBD1, SREBF2, TFDP2
M.7	GO:0000226	microtubule cytoskeleton organization	0.0242138	19	[BCAS3, BICD2, CUL7, DAG1, DCTN1, DNAAF5, DYNC1H1, HTT, LLGL1, MAP4, MBD1, MID1IP1, NDEL1, NEURL1, PKD1, SUN2, TACC2, TPPP, WEE1]	TACC2	MBD1
M.7	GO:0070588	calcium ion transmembrane transport	0.025496	12	[CACNA2D2, DIAPH1, DYSF, HTT, JPH2, MED12, NOS1, PKD1, PLCD3, RYR1, SLC25A25, STIM1]	JPH2, STIM1
M.7	GO:0051146	striated muscle cell differentiation	0.025856	12	[ALPK3, CACNA2D2, DYSF, FLNC, HDAC5, NOL6, NOS1, RXRA, RYR1, STIM1, WFIKKN2, XBP1]	RXRA, STIM1	RXRA, XBP1
M.7	GO:0071277	cellular response to calcium ion	0.0269426	5	[ADCY1, ADD1, JUN, RASA4B, RYR1]		JUN
M.7	GO:0021795	cerebral cortex cell migration	0.0271856	4	[DAB2IP, NDEL1, PEX5, SUN2]	DAB2IP
M.7	GO:0007517	muscle organ development	0.0278489	15	[ALX4, ANKRD52, EP300, FOXK1, JPH2, LARGE1, MEF2D, NEURL1, POLR2D, RXRA, RYR1, SPEG, UBE4B, USP19, XBP1]	JPH2, RXRA, SPEG	ALX4, FOXK1, MEF2D, RXRA, XBP1
M.7	GO:0048732	gland development	0.0320918	15	[AKT2, ARHGAP35, DAG1, IRS2, JUN, MAFB, NEURL1, PHF2, PKD1, PLXNA1, PSAP, RREB1, RXRA, THRA, XBP1]	RXRA, THRA	ARHGAP35, JUN, MAFB, RREB1, RXRA, THRA, XBP1
M.7	GO:0030968	endoplasmic reticulum unfolded protein response	0.0330188	7	[ADD1, CUL7, DAB2IP, DCTN1, EP300, SRPRA, XBP1]	DAB2IP	XBP1
M.7	GO:0032479	regulation of type I interferon production	0.0337568	7	[CRCP, CREBBP, EP300, NPLOC4, POLR3E, RNF216, TIRAP]	CREBBP
M.7	GO:0071230	cellular response to amino acid stimulus	0.0341687	5	[DNMT3A, MED12, NEURL1, RPTOR, XBP1]		XBP1
M.7	GO:0034250	positive regulation of cellular amide metabolic process	0.0380948	8	[CTIF, EIF4G1, HNRNPL, LARP1, NAT10, POLR2D, RXRA, YTHDF1]	EIF4G1, LARP1, RXRA	RXRA
M.7	GO:0001678	cellular glucose homeostasis	0.0401061	7	[FOXK1, FOXK2, IGF1R, IRS2, KCNJ11, MED12, XBP1]	FOXK2	FOXK1, FOXK2, XBP1
M.7	GO:0007611	learning or memory	0.0413494	9	[ADCY1, EP300, HTT, JUN, LLGL1, LRCH4, PAK6, THRA, YTHDF1]	THRA	JUN, THRA
M.7	GO:0072686	mitotic spindle	0.0428901	6	[ALPK3, DCTN1, DIAPH1, MAP4, TFDP2, TPPP]		TFDP2
M.7	GO:0097306	cellular response to alcohol	0.0439539	5	[ADCY1, DAG1, DNMT3A, JUP, LARP1]	LARP1
M.7	GO:0002011	morphogenesis of an epithelial sheet	0.0458182	4	[ARHGAP35, DAG1, DVL2, RREB1]		ARHGAP35, RREB1
M.7	GO:0046580	negative regulation of Ras protein signal transduction	0.0458182	4	[ARHGAP35, DAB2IP, RAPGEF1, RASA4B]	DAB2IP, RAPGEF1	ARHGAP35
M.7	GO:0044380	protein localization to cytoskeleton	0.0492927	4	[DIAPH1, KLHL21, MBD1, RTKN]		MBD1
M.8	R-HSA:397014	Muscle contraction	4.5097e-08	13	[ACTA2, ACTG2, CACNB2, CALD1, GUCY1A1, KCNK3, MYH11, MYL4, MYL9, MYLK, RYR2, SCN3A, SLC8A1]	ACTA2, ACTG2, CALD1, MYH11, MYL9, MYLK
M.8	KEGG:04270	Vascular smooth muscle contraction	6.79846e-08	11	[ACTA2, ACTG2, CALD1, GUCY1A1, KCNMB1, MRVI1, MYH11, MYL9, MYLK, PLA2G4A, PPP1R12A]	ACTA2, ACTG2, CALD1, MRVI1, MYH11, MYL9, MYLK
M.8	GO:0035296	regulation of tube diameter	4.331e-07	10	[ACTA2, CSRP1, FOXC1, FOXC2, GJA5, GUCY1A1, HRH2, KCNMB1, P2RX1, SLC8A1]	ACTA2, CSRP1	FOXC1, FOXC2
M.8	GO:0006939	smooth muscle contraction	5.27199e-07	9	[ACTA2, CNN1, GUCY1A1, MYH11, MYLK, MYOCD, NPNT, P2RX1, SLC8A1]	ACTA2, CNN1, MYH11, MYLK
M.8	R-HSA:445355	Smooth Muscle Contraction	5.55121e-07	7	[ACTA2, ACTG2, CALD1, GUCY1A1, MYH11, MYL9, MYLK]	ACTA2, ACTG2, CALD1, MYH11, MYL9, MYLK
M.8	GO:0043292	contractile fiber	1.535e-06	13	[ACTA2, ACTN1, CALD1, CSRP1, FHL5, FLNA, MYH11, MYL4, MYL9, NPNT, PPP1R12A, RYR2, SLC8A1]	ACTA2, ACTN1, CALD1, CSRP1, FLNA, MYH11, MYL9
M.8	GO:0006937	regulation of muscle contraction	3.05822e-06	10	[CNN1, FLNA, GJA5, GUCY1A1, MYL9, MYOCD, NPNT, P2RX1, RYR2, SLC8A1]	CNN1, FLNA, MYL9
M.8	WP:289	Myometrial Relaxation and Contraction Pathways	1.49058e-05	9	[ACTA2, CALD1, CNN1, GUCY1A1, MYL4, PLCD1, RGS6, RYR2, SLC8A1]	ACTA2, CALD1, CNN1
M.8	WP:1591	Heart Development	8.34418e-05	5	[FOXC1, FOXC2, GATA6, MIR145, VEGFC]		FOXC1, FOXC2, GATA6
M.8	GO:0006940	regulation of smooth muscle contraction	0.000175534	5	[CNN1, GUCY1A1, MYOCD, NPNT, P2RX1]	CNN1
M.8	GO:0048738	cardiac muscle tissue development	0.000204682	9	[FOXC1, FOXC2, GATA6, GJA5, GLI1, MYH11, MYOCD, RYR2, SLC8A1]	MYH11	FOXC1, FOXC2, GATA6, GLI1
M.8	GO:0046928	regulation of neurotransmitter secretion	0.000206927	6	[CACNA1A, CACNB2, GRIK5, P2RX1, RIMS1, RIMS3]	CACNA1A
M.8	R-HSA:112316	Neuronal System	0.000208735	10	[CACNA1A, CACNB2, GRIK5, KCNAB1, KCNK3, KCNMB1, LRRC4B, NRGN, NTRK3, RIMS1]	CACNA1A, KCNAB1
M.8	GO:0048844	artery morphogenesis	0.000474463	5	[FOXC1, FOXC2, GJA5, MYLK, MYOCD]	MYLK	FOXC1, FOXC2
M.8	GO:0002576	platelet degranulation	0.00092718	6	[ACTN1, FLNA, ITIH3, MMRN1, P2RX1, VEGFC]	ACTN1, FLNA
M.8	GO:0007416	synapse assembly	0.00130076	6	[CACNA1A, CBLN1, LRRC4B, MAP1B, NTRK3, PCDHB16]	CACNA1A
M.8	GO:0030863	cortical cytoskeleton	0.00215629	5	[CALD1, DSTN, FLNA, RIMS1, RIMS3]	CALD1, DSTN, FLNA
M.8	GO:0031345	negative regulation of cell projection organization	0.00289858	6	[CCL21, ITM2C, LINGO1, MAP2, NR2F1, TACSTD2]		NR2F1
M.8	GO:0048644	muscle organ morphogenesis	0.00437762	4	[FOXC1, FOXC2, MYLK, RYR2]	MYLK	FOXC1, FOXC2
M.8	GO:0001704	formation of primary germ layer	0.011101	4	[FOXC1, FOXC2, GATA6, ITGA8]		FOXC1, FOXC2, GATA6
